# Supplementary material for: Critical role of WNK1 in MYC-dependent early mouse thymocyte development
Source: eLife. 2020 Oct 14;9:e56934. doi: 10.7554/eLife.56934 (PMC7591260; doi:10.7554/eLife.56934)
Supplement: Supplementary file 2. — Analysis of RNAseq experiment described in Figure 3A, showing differential gene expression analysis with DESeq2, taking into account all genes. [file elife-56934-supp2.xlsx]

## Sheet: Read me
DESeq2 analysis of differential gene expression
Samples:
0 hours: 4 Wnk1fl/flRag1-/-CD2-Cre and 3 Wnk1fl/+Rag1-/-CD2-Cre
3 hours: 3 Wnk1fl/flRag1-/-CD2-Cre and 3 Wnk1fl/+Rag1-/-CD2-Cre
24 hours: 3 Wnk1fl/flRag1-/-CD2-Cre and 3 Wnk1fl/+Rag1-/-CD2-Cre
48 hours: 3 Wnk1fl/flRag1-/-CD2-Cre and 3 Wnk1fl/+Rag1-/-CD2-Cre
Worksheets
Sheets show differential gene expression analysis between Wnk1fl/flRag1-/-CD2-Cre (KO) and Wnk1fl/+Rag1-/-CD2-Cre(HET) at 0, 3, 24 and 48 h after anti-CD3e injection
Columns	Meaning
ID	Gene ID in Ensembl
gene	Gene symbol in MGI
baseMean	Average of the normalized counts taken over all samples
log2FoldChange	Log2fold change between Wnk1fl/flRag1-/-CD2-Cre (KO) and Wnk1fl/+Rag1-/-CD2-Cre(HET)
lfcSE	Standard error of the log2FoldChange estimate
stat	Wald statistic
pvalue	Wald test p-value
padj	Benjamini-Hochberg adjusted p-value
NA, not available

## Sheet: 0 hours KO vs HET unfiltered
ID	gene	baseMean	log2FoldChange	lfcSE	stat	pvalue	padj
ENSMUSG00000000001	GNAI3	10504.4	0.553728	0.265848	2.08287	0.0372627	0.12624
ENSMUSG00000000003	PBSN	0	NA	NA	NA	NA	NA
ENSMUSG00000000028	CDC45	1597.1	0.421149	0.314994	1.33701	0.181219	0.373681
ENSMUSG00000000031	H19	10327.6	-1.20658	0.562404	-2.14541	0.0319204	0.112864
ENSMUSG00000000037	SCML2	65.5556	-0.425082	0.336962	-1.26151	0.207124	0.406915
ENSMUSG00000000049	APOH	1.70369	-1.08035	0.672622	-1.60618	0.108234	NA
ENSMUSG00000000056	NARF	1982.71	0.00822393	0.202826	0.0405467	0.967657	0.987115
ENSMUSG00000000058	CAV2	2.00738	1.13144	0.666334	1.69801	0.0895059	NA
ENSMUSG00000000078	KLF6	1647.36	0.287158	0.243441	1.17958	0.238168	0.443082
ENSMUSG00000000085	SCMH1	1195.44	-0.268596	0.148621	-1.80725	0.0707226	0.196833
ENSMUSG00000000088	COX5A	3359.84	0.186488	0.144636	1.28936	0.197273	0.394926
ENSMUSG00000000093	TBX2	2.0632	-1.37153	0.67252	-2.03939	0.0414113	NA
ENSMUSG00000000094	TBX4	0.424463	0	0.301819	0	1	NA
ENSMUSG00000000103	ZFY2	0	NA	NA	NA	NA	NA
ENSMUSG00000000120	NGFR	36.6058	-3.30468	0.545956	-6.05302	1.42157e-09	8.88578e-08
ENSMUSG00000000125	WNT3	0.884114	1.09889	0.63006	1.74411	0.0811404	NA
ENSMUSG00000000126	WNT9A	4.84536	0.248495	0.643228	0.386326	NA	NA
ENSMUSG00000000127	FER	44.1557	0.524958	0.339128	1.54796	0.121631	0.286271
ENSMUSG00000000131	XPO6	5793.68	-0.268342	0.119996	-2.23626	0.0253345	0.0958331
ENSMUSG00000000134	TFE3	1402.18	0.585141	0.189683	3.08484	0.00203663	0.0143624
ENSMUSG00000000142	AXIN2	891.911	0.492567	0.211411	2.32991	0.019811	0.0797233
ENSMUSG00000000148	BRAT1	1370.78	-0.189622	0.14124	-1.34255	0.179418	0.371135
ENSMUSG00000000149	GNA12	2086.33	0.0596365	0.117369	0.508111	0.611376	0.781834
ENSMUSG00000000154	SLC22A18	1.60429	-1.10474	0.66728	-1.65559	0.0978043	NA
ENSMUSG00000000157	ITGB2L	0.0611446	0	0.301474	0	1	NA
ENSMUSG00000000159	IGSF5	1.73872	-0.0383232	0.621892	-0.0616235	0.950863	NA
ENSMUSG00000000167	PIH1D2	37.7746	0.518562	0.329918	1.57179	0.115999	0.277495
ENSMUSG00000000168	DLAT	1677.7	0.194266	0.090033	2.15772	0.0309494	0.110327
ENSMUSG00000000171	SDHD	2904.19	-0.102138	0.114443	-0.892476	0.372138	0.589792
ENSMUSG00000000182	FGF23	0	NA	NA	NA	NA	NA
ENSMUSG00000000183	FGF6	0.0758083	0	0.301474	0	1	NA
ENSMUSG00000000184	CCND2	18069.7	-0.327752	0.207494	-1.57957	0.114205	0.275
ENSMUSG00000000194	GPR107	1676	-0.457747	0.16686	-2.74329	0.00608265	0.033266
ENSMUSG00000000197	NALCN	0	NA	NA	NA	NA	NA
ENSMUSG00000000202	BTBD17	0.660877	-0.44808	0.562336	-0.796818	0.425557	NA
ENSMUSG00000000204	SLFN4	0.813163	0.317306	0.622594	0.509652	0.610295	NA
ENSMUSG00000000214	TH	0.0984641	0	0.301474	0	1	NA
ENSMUSG00000000215	INS2	0	NA	NA	NA	NA	NA
ENSMUSG00000000216	SCNN1G	0.0945778	0.032642	0.301474	0.108275	0.913778	NA
ENSMUSG00000000223	DRP2	6.79824	-0.380913	0.542202	-0.70253	0.482349	0.686543
ENSMUSG00000000244	TSPAN32	1320.87	1.36186	0.607629	2.24127	0.0250087	0.0950819
ENSMUSG00000000247	LHX2	18.1787	0.247008	0.552727	0.446889	0.654955	0.811318
ENSMUSG00000000248	CLEC2G	5.89332	0.150819	0.449398	0.335604	0.73717	0.862774
ENSMUSG00000000253	GMPR	495.435	-0.733914	0.207342	-3.53963	0.000400694	0.00392479
ENSMUSG00000000263	GLRA1	0	NA	NA	NA	NA	NA
ENSMUSG00000000266	MID2	1.22492	-0.0398994	0.662574	-0.0602188	0.951981	NA
ENSMUSG00000000275	TRIM25	5331.62	-0.253232	0.208748	-1.2131	0.225091	0.428315
ENSMUSG00000000276	DGKE	2548.78	-0.118831	0.391436	-0.303578	0.761449	0.877222
ENSMUSG00000000278	SCPEP1	367.699	0.053321	0.278735	0.191296	0.848293	0.92936
ENSMUSG00000000282	MNT	2755.31	0.123476	0.186181	0.663202	0.507201	0.706214
ENSMUSG00000000290	ITGB2	8922.93	0.980944	0.326819	3.00149	0.00268661	0.0176373
ENSMUSG00000000295	HDDC2	635.118	-0.199223	0.172051	-1.15793	0.246893	0.453789
ENSMUSG00000000296	TPD52L1	0.178091	0.108841	0.301525	0.360968	0.718123	NA
ENSMUSG00000000301	PEMT	96.8606	0.187503	0.214956	0.872289	0.383051	0.59984
ENSMUSG00000000303	CDH1	1343.55	-0.432192	0.372452	-1.1604	0.245887	0.452376
ENSMUSG00000000305	CDH4	1.22984	-0.0221897	0.668631	-0.0331868	0.973526	NA
ENSMUSG00000000308	CKMT1	0.536038	0	0.455625	0	1	NA
ENSMUSG00000000317	BCL6B	20.556	1.40504	0.577067	2.43479	0.0149003	0.0648823
ENSMUSG00000000318	CLEC10A	1.92373	0.578943	0.66968	0.864508	0.387309	NA
ENSMUSG00000000320	ALOX12	0.681067	-0.230104	0.447399	-0.514316	0.607031	NA
ENSMUSG00000000325	ARVCF	654.155	-0.379114	0.266343	-1.4234	0.154619	0.335619
ENSMUSG00000000326	COMT	677.047	-0.235448	0.185529	-1.26906	0.204419	0.40335
ENSMUSG00000000339	RTCA	1129.73	-0.113789	0.092878	-1.22515	0.22052	0.42234
ENSMUSG00000000340	DBT	857.99	-0.189385	0.179774	-1.05346	0.292131	0.506551
ENSMUSG00000000346	DAZAP2	10706.9	0.0575084	0.120462	0.477399	0.633078	0.797082
ENSMUSG00000000355	MCTS1	915.774	0.490552	0.228749	2.1445	0.0319926	0.113016
ENSMUSG00000000359	REM1	0.19907	0	0.301474	0	1	NA
ENSMUSG00000000365	RNF17	7.3812	-1.99829	0.583403	-3.42524	0.000614258	0.00553733
ENSMUSG00000000374	TRAPPC10	3723.6	0.331414	0.114471	2.89517	0.00378952	0.0230806
ENSMUSG00000000378	CCM2	4024.59	-0.317576	0.18454	-1.7209	0.0852681	0.223433
ENSMUSG00000000381	WAP	0	NA	NA	NA	NA	NA
ENSMUSG00000000384	TBRG4	2501.15	0.0201492	0.154728	0.130224	0.896389	0.951781
ENSMUSG00000000385	TMPRSS2	1.07585	-0.160172	0.651859	-0.245715	0.805903	NA
ENSMUSG00000000386	MX1	178.273	0.954907	0.512827	1.86205	0.0625965	0.180708
ENSMUSG00000000392	FAP	1.78709	0.58588	0.660609	0.886879	0.375144	NA
ENSMUSG00000000394	GCG	0.0592209	0	0.301474	0	1	NA
ENSMUSG00000000399	NDUFA9	2995.29	-0.133668	0.119874	-1.11507	0.264821	0.474571
ENSMUSG00000000402	EGFL6	0.558456	0.0448039	0.362082	0.123739	0.901522	NA
ENSMUSG00000000409	LCK	47518.6	-0.863143	0.159317	-5.41776	6.03495e-08	2.33786e-06
ENSMUSG00000000411	TSSK3	0.169159	-0.057061	0.301474	-0.189274	0.849878	NA
ENSMUSG00000000416	CTTNBP2	22.0502	1.16136	0.624608	1.85935	0.0629777	0.181382
ENSMUSG00000000420	GALNT1	6324.02	0.318122	0.18785	1.69348	0.0903634	0.232436
ENSMUSG00000000435	MYF5	0	NA	NA	NA	NA	NA
ENSMUSG00000000439	MKRN2	1523.53	0.0519852	0.0700697	0.741907	0.458144	0.665772
ENSMUSG00000000440	PPARG	77.591	-0.939504	0.464973	-2.02055	0.0433259	0.140287
ENSMUSG00000000441	RAF1	4201.46	-0.034118	0.0772803	-0.441484	0.658863	0.813936
ENSMUSG00000000486	SEPT1	17715.2	-0.449174	0.170203	-2.63905	0.00831391	0.0419621
ENSMUSG00000000489	PDGFB	7.91076	0.369092	0.574727	0.642205	0.52074	0.716653
ENSMUSG00000000530	ACVRL1	77.3816	-0.00833764	0.405849	-0.0205437	0.98361	0.994246
ENSMUSG00000000531	GRASP	362.672	-0.3217	0.37267	-0.86323	0.388011	0.604037
ENSMUSG00000000532	ACVR1B	1555.96	-0.0199099	0.173267	-0.114909	0.908518	0.957682
ENSMUSG00000000538	TOM1L2	907.718	-0.176465	0.168069	-1.04996	0.293738	0.508228
ENSMUSG00000000544	GPA33	0.356316	0.111556	0.378945	0.294385	0.768464	NA
ENSMUSG00000000552	ZFP385A	1723.47	-0.607565	0.226813	-2.67871	0.00739071	0.0384746
ENSMUSG00000000555	ITGA5	925.044	-0.81245	0.214234	-3.79234	0.000149233	0.00176292
ENSMUSG00000000560	GABRA2	0.520326	0.0406145	0.487586	0.0832971	0.933615	NA
ENSMUSG00000000561	WDR77	3377.32	-0.209111	0.1814	-1.15276	0.249008	0.456055
ENSMUSG00000000562	ADORA3	25.1509	1.29451	0.487303	2.65648	0.00789618	0.0403489
ENSMUSG00000000563	ATP5F1	10174.6	0.130523	0.134835	0.968022	0.333033	0.549201
ENSMUSG00000000567	SOX9	0.769766	-0.916439	0.630238	-1.45412	0.145914	NA
ENSMUSG00000000568	HNRNPD	7961.1	0.134291	0.210003	0.639471	0.522517	0.718166
ENSMUSG00000000579	DYNLT1C	703.501	-0.408349	0.218142	-1.87194	0.0612151	0.177825
ENSMUSG00000000581	C1D	1414.07	0.16589	0.184586	0.898714	0.368805	0.586234
ENSMUSG00000000594	GM2A	6527.04	-0.0126947	0.166117	-0.0764204	0.939085	0.972926
ENSMUSG00000000600	KRIT1	1628.55	0.695586	0.219847	3.16395	0.00155642	0.0117055
ENSMUSG00000000605	CLCN4	2111.94	0.507264	0.175526	2.88996	0.00385291	0.0233839
ENSMUSG00000000606	VMN2R88	0	NA	NA	NA	NA	NA
ENSMUSG00000000617	GRM6	0.61508	-0.05595	0.500596	-0.111767	0.911008	NA
ENSMUSG00000000627	SEMA4F	260.853	0.597544	0.4991	1.19724	0.231212	0.434913
ENSMUSG00000000628	HK2	786.74	0.996471	0.270815	3.67953	0.000233661	0.0025566
ENSMUSG00000000631	MYO18A	6032.76	-0.0117223	0.189174	-0.0619656	0.95059	0.978597
ENSMUSG00000000632	SEZ6	0.167738	0	0.301474	0	1	NA
ENSMUSG00000000673	HAAO	38.377	-1.18901	0.650675	-1.82736	0.0676463	0.190834
ENSMUSG00000000682	CD52	5689.07	-0.303552	0.415398	-0.730749	0.464933	0.671157
ENSMUSG00000000686	ABHD15	940.379	-0.828656	0.267829	-3.09397	0.00197497	0.014037
ENSMUSG00000000690	HOXB6	0	NA	NA	NA	NA	NA
ENSMUSG00000000693	LOXL3	11.1918	0.0300383	0.487089	0.061669	0.950826	0.978708
ENSMUSG00000000701	TCL1B5	0	NA	NA	NA	NA	NA
ENSMUSG00000000706	BTN1A1	1.41475	1.30011	0.660745	1.96765	0.0491087	NA
ENSMUSG00000000708	KAT2B	1509.63	-0.107317	0.220945	-0.485719	0.627166	0.793297
ENSMUSG00000000711	RAB5B	3305.4	-0.349967	0.165642	-2.1128	0.0346182	0.11995
ENSMUSG00000000724	CRYBA1	0	NA	NA	NA	NA	NA
ENSMUSG00000000730	DNMT3L	14.9379	0.716037	0.437559	1.63644	0.101748	0.253413
ENSMUSG00000000731	AIRE	65.2245	0.913613	0.457392	1.99744	0.0457775	0.145245
ENSMUSG00000000732	ICOSL	385.678	1.19443	0.263992	4.5245	6.0539e-06	0.000125757
ENSMUSG00000000738	SPG7	1908.92	0.0909496	0.117505	0.774004	0.438928	0.648395
ENSMUSG00000000739	SULT5A1	2.81751	-0.602777	0.64431	-0.935539	0.349511	0.566359
ENSMUSG00000000740	RPL13	21033.5	-0.701824	0.17599	-3.98786	6.66716e-05	0.000921085
ENSMUSG00000000743	CHMP1A	3032.34	-0.573436	0.186885	-3.06839	0.00215217	0.0149868
ENSMUSG00000000751	RPA1	7314.51	0.0861212	0.139615	0.616847	0.537336	0.730254
ENSMUSG00000000753	SERPINF1	30.2651	-0.0370613	0.440325	-0.0841679	0.932923	0.970032
ENSMUSG00000000759	TUBGCP3	2240.36	-0.0551242	0.0873258	-0.631248	0.527878	0.722637
ENSMUSG00000000766	OPRM1	0.28013	-0.0258184	0.319355	-0.0808456	0.935565	NA
ENSMUSG00000000776	POLR3D	850.618	-0.297365	0.213309	-1.39406	0.1633	0.348559
ENSMUSG00000000782	TCF7	84410.3	0.534113	0.10837	4.92861	8.28181e-07	2.28281e-05
ENSMUSG00000000787	DDX3X	17102	0.365112	0.25543	1.4294	0.152889	0.333082
ENSMUSG00000000791	IL12RB1	1714.93	0.199603	0.279854	0.713242	0.475696	0.680601
ENSMUSG00000000792	SLC5A5	2.34866	1.32049	0.660082	2.00049	0.0454471	0.144597
ENSMUSG00000000794	KCNN3	1.99808	-0.328227	0.65817	-0.498697	0.617993	NA
ENSMUSG00000000804	USP32	1401.39	0.120664	0.18494	0.652448	0.514112	0.711459
ENSMUSG00000000805	CAR4	0.228713	0	0.301474	0	NA	NA
ENSMUSG00000000811	TXNRD3	392.377	0.820877	0.301898	2.71905	0.00654697	0.0351526
ENSMUSG00000000817	FASL	67.5288	0.699396	0.51937	1.34662	0.178101	0.369383
ENSMUSG00000000823	ZFP512B	2203	-0.785634	0.202852	-3.87294	0.000107531	0.001352
ENSMUSG00000000826	DNAJC5	5943.64	-0.227325	0.110994	-2.04808	0.0405522	0.133782
ENSMUSG00000000827	TPD52L2	1992.61	-0.113622	0.120686	-0.941466	0.346466	0.56304
ENSMUSG00000000838	FMR1	1700.15	0.877412	0.2969	2.95524	0.00312423	0.0198144
ENSMUSG00000000861	BCL11A	112.82	0.171079	0.509889	0.335522	0.737232	0.862787
ENSMUSG00000000869	IL4	9.79724	0	0.671688	0	1	1
ENSMUSG00000000876	PXMP4	1188.83	-0.843208	0.119672	-7.04598	1.84162e-12	2.18454e-10
ENSMUSG00000000881	DLG3	651.534	-0.575987	0.136739	-4.21232	2.52757e-05	0.000414426
ENSMUSG00000000884	GNB1L	604.856	-0.0581701	0.168824	-0.34456	0.730425	0.859354
ENSMUSG00000000889	DBH	0.67598	-1.03997	0.561408	-1.85244	0.063963	NA
ENSMUSG00000000901	MMP11	131.722	-0.548446	0.336084	-1.63187	0.102707	0.255151
ENSMUSG00000000902	SMARCB1	3819.14	-0.0827794	0.145992	-0.567013	0.570705	0.754724
ENSMUSG00000000903	VPREB3	0.728092	-0.0135227	0.45076	-0.0299998	0.976067	NA
ENSMUSG00000000915	HIP1R	1857.4	-0.120182	0.233257	-0.515236	0.606388	0.77864
ENSMUSG00000000916	NSUN5	832.776	0.0181653	0.169735	0.107022	0.914772	0.960913
ENSMUSG00000000934	TOP1MT	221.593	-0.0380928	0.198914	-0.191504	0.84813	0.92936
ENSMUSG00000000938	HOXA10	0.735732	0.0767579	0.474364	0.161812	0.871454	NA
ENSMUSG00000000942	HOXA4	8.58454	-0.587779	0.570364	-1.03053	0.30276	0.518414
ENSMUSG00000000948	GM38393	0.024507	0.0343122	0.301474	0.113815	0.909384	NA
ENSMUSG00000000957	MMP14	97.8531	-0.00402336	0.457713	-0.00879012	0.992987	0.998807
ENSMUSG00000000958	SLC7A7	36.0503	-0.285989	0.387166	-0.738672	0.460106	0.667664
ENSMUSG00000000959	OXA1L	3248.01	-0.0202575	0.128926	-0.157125	0.875146	0.942786
ENSMUSG00000000976	HEATR6	1604.81	-0.29657	0.117116	-2.53229	0.0113321	0.0531346
ENSMUSG00000000982	CCL3	96.5099	-0.627695	0.667473	-0.940405	0.34701	0.563593
ENSMUSG00000000983	WFDC18	0.29934	0.0250709	0.301524	0.0831473	0.933734	NA
ENSMUSG00000001014	ICAM4	10.9151	-0.888462	0.515236	-1.72438	0.0846396	0.222396
ENSMUSG00000001016	ILF2	4116.54	0.0751086	0.11929	0.629631	0.528936	0.7233
ENSMUSG00000001017	CHTOP	7351.63	-0.0262773	0.0856223	-0.306898	0.758921	0.87563
ENSMUSG00000001018	SNAPIN	1006.35	-0.351102	0.163166	-2.1518	0.0314129	0.111563
ENSMUSG00000001020	S100A4	971.186	-0.16372	0.646221	-0.25335	0.799998	0.901206
ENSMUSG00000001021	S100A3	8.28002	0.344189	0.670163	0.513589	0.607539	0.779652
ENSMUSG00000001023	S100A5	0.397335	0.0714918	0.302013	0.236718	0.812876	NA
ENSMUSG00000001025	S100A6	385.24	0.371342	0.62282	0.596226	0.551024	0.740218
ENSMUSG00000001027	SCN4A	3.09747	-0.991808	0.659532	-1.50381	0.132631	0.303157
ENSMUSG00000001029	ICAM2	1459.55	0.0137211	0.176765	0.0776234	0.938128	0.972505
ENSMUSG00000001034	MAPK7	986.141	-0.216936	0.238087	-0.911165	0.362209	0.579749
ENSMUSG00000001036	EPN2	16.463	-0.309186	0.453951	-0.681099	0.495809	0.697484
ENSMUSG00000001039	B9D1	81.4496	-0.879895	0.422046	-2.08483	0.0370845	0.125908
ENSMUSG00000001052	SEC24B	4418.5	0.118376	0.119443	0.991061	0.321656	0.537134
ENSMUSG00000001053	N4BP3	696.953	-0.209662	0.225856	-0.928299	0.353252	0.570525
ENSMUSG00000001054	RMND5B	2087.78	-0.252513	0.175352	-1.44004	0.149857	0.328337
ENSMUSG00000001056	NHP2	2672.3	-0.263699	0.212085	-1.24337	0.213733	0.414641
ENSMUSG00000001062	VPS9D1	582.835	-0.101304	0.190922	-0.530604	0.595693	0.77144
ENSMUSG00000001065	ZFP276	793.262	-0.267335	0.146461	-1.8253	0.0679559	0.191488
ENSMUSG00000001076	C1QL4	0.269458	0.0129373	0.3016	0.0428957	0.965785	NA
ENSMUSG00000001082	MFSD10	1241.76	0.0616942	0.146397	0.421416	0.673451	0.822774
ENSMUSG00000001089	LUZP1	768.804	1.23359	0.220867	5.5852	2.33435e-08	1.01648e-06
ENSMUSG00000001095	SLC13A2	0.686268	-0.613804	0.388629	-1.57941	0.114242	NA
ENSMUSG00000001098	KCTD10	3193.01	0.143829	0.200812	0.716235	0.473846	0.679041
ENSMUSG00000001100	POLDIP2	2450.25	-0.373858	0.155776	-2.39997	0.0163966	0.0696007
ENSMUSG00000001103	SEBOX	1.74179	0	0.30774	0	NA	NA
ENSMUSG00000001105	IFT20	1021.83	-0.177606	0.106599	-1.66611	0.0956909	0.242505
ENSMUSG00000001119	COL6A1	5.70206	-0.706777	0.663251	-1.06562	NA	NA
ENSMUSG00000001120	PCBP3	344.577	-0.647135	0.216696	-2.98638	0.00282305	0.0183098
ENSMUSG00000001123	LGALS9	15799	0.0432634	0.175645	0.246311	0.805441	0.904319
ENSMUSG00000001127	ARAF	1806.87	-0.5419	0.129599	-4.18136	2.89769e-05	0.000458512
ENSMUSG00000001128	CFP	98.163	0.0726031	0.277803	0.261348	0.793824	0.897743
ENSMUSG00000001131	TIMP1	0.677084	0.167332	0.610937	0.273894	0.784166	NA
ENSMUSG00000001134	UXT	535.868	-0.136175	0.148734	-0.915561	0.359897	0.577179
ENSMUSG00000001138	CNNM3	1375.68	-0.273149	0.100777	-2.71043	0.00671955	0.0357821
ENSMUSG00000001143	LMAN2L	2982.77	-0.452937	0.196237	-2.30812	0.0209926	0.0836398
ENSMUSG00000001150	MCM3AP	3763.57	-0.201234	0.100451	-2.0033	0.045145	0.144062
ENSMUSG00000001151	PCNT	3544.26	0.0529113	0.174029	0.304037	0.7611	0.876996
ENSMUSG00000001155	FTCD	0.0309578	0	0.301474	0	1	NA
ENSMUSG00000001156	MXD1	901.323	0.325262	0.210047	1.54852	0.121498	0.286119
ENSMUSG00000001157	GMCL1	1571.47	0.203833	0.188613	1.08069	0.279835	0.492294
ENSMUSG00000001158	SNRNP27	1540.53	-0.503805	0.133712	-3.76783	0.000164674	0.00191119
ENSMUSG00000001166	OAS1C	281.631	-0.508904	0.25607	-1.98737	0.0468817	0.14755
ENSMUSG00000001168	OAS1H	0	NA	NA	NA	NA	NA
ENSMUSG00000001173	OCRL	453.869	-0.537798	0.177836	-3.02413	0.00249353	0.0166688
ENSMUSG00000001175	CALM1	13298.8	0.843928	0.169869	4.96811	6.76073e-07	1.92843e-05
ENSMUSG00000001211	AGPAT3	4319.1	-0.487042	0.184768	-2.63596	0.00839003	0.0422573
ENSMUSG00000001225	SLC26A3	0.0289605	0	0.301474	0	1	NA
ENSMUSG00000001227	SEMA6B	80.1059	0.0642673	0.332931	0.193035	0.846931	0.928795
ENSMUSG00000001228	UHRF1	13700.7	-0.837628	0.287748	-2.91098	0.00360298	0.0221563
ENSMUSG00000001229	DPP9	3033.22	-0.0916489	0.104694	-0.875397	0.381358	0.597936
ENSMUSG00000001240	RAMP2	12.9069	-0.0121628	0.630457	-0.0192921	0.984608	0.994612
ENSMUSG00000001247	LSR	106.483	-1.75744	0.357596	-4.91459	8.89691e-07	2.429e-05
ENSMUSG00000001248	GRAMD1A	4364.42	0.493787	0.32878	1.50188	0.133129	0.303891
ENSMUSG00000001249	HPN	6.81971	3.33471	0.601941	5.53993	3.02596e-08	1.26327e-06
ENSMUSG00000001260	GABRG1	0.122289	0	0.301474	0	1	NA
ENSMUSG00000001270	CKB	103.635	0.46992	0.454506	1.03391	0.301176	0.516422
ENSMUSG00000001280	SP1	6802.54	0.125258	0.183934	0.680994	0.495875	0.697484
ENSMUSG00000001281	ITGB7	6333.13	0.921945	0.583128	1.58103	0.11387	0.274501
ENSMUSG00000001285	MYG1	1679.75	-0.155423	0.170668	-0.910675	0.362467	0.580055
ENSMUSG00000001288	RARG	231.733	0.915345	0.580944	1.57562	0.115114	0.276376
ENSMUSG00000001289	PFDN5	4605.02	-0.373436	0.170854	-2.1857	0.0288378	0.105042
ENSMUSG00000001300	EFNB2	26.2632	2.34974	0.405306	5.79743	6.73373e-09	3.4368e-07
ENSMUSG00000001305	RRP15	1193.76	0.116892	0.180699	0.646888	0.517704	0.714189
ENSMUSG00000001313	RND2	152.446	0.434483	0.219946	1.9754	0.0482223	0.1505
ENSMUSG00000001323	SRR	656.243	-0.764777	0.112188	-6.8169	9.30233e-12	9.87654e-10
ENSMUSG00000001333	SYNC	0.236108	0.0250705	0.301525	0.0831458	0.933736	NA
ENSMUSG00000001334	FNDC5	0.083621	0	0.301474	0	1	NA
ENSMUSG00000001348	ACP5	2632.34	-0.86097	0.344395	-2.49995	0.0124211	0.0567597
ENSMUSG00000001349	CNN1	0.141424	0	0.301474	0	1	NA
ENSMUSG00000001366	FBXO9	1379.14	0.13459	0.157477	0.854664	0.392737	0.608018
ENSMUSG00000001376	VPS50	797.108	0.19407	0.199302	0.973746	0.330182	0.546124
ENSMUSG00000001380	HARS	2958.15	-0.107114	0.102419	-1.04585	0.295633	0.510325
ENSMUSG00000001383	ZMAT2	3321.97	-0.122255	0.0958752	-1.27515	0.202257	0.401062
ENSMUSG00000001403	UBE2C	1978.05	-0.00737799	0.356131	-0.0207171	0.983471	0.994246
ENSMUSG00000001415	SMG5	4303.84	-0.746	0.136159	-5.47888	4.28033e-08	1.72416e-06
ENSMUSG00000001416	CCT3	10616.4	-0.0959176	0.159484	-0.601426	0.547556	0.737911
ENSMUSG00000001418	GLMP	2764.73	-0.549724	0.186401	-2.94915	0.00318646	0.0201127
ENSMUSG00000001419	MEF2D	8223.21	-0.32134	0.172414	-1.86377	0.0623545	0.180131
ENSMUSG00000001420	TMEM79	69.9127	0.013732	0.243444	0.056407	0.955018	0.980909
ENSMUSG00000001424	SND1	8592.41	-0.306728	0.137018	-2.23859	0.0251824	0.0954384
ENSMUSG00000001435	COL18A1	1.73769	-0.304054	0.665844	-0.456645	0.647926	NA
ENSMUSG00000001436	SLC19A1	1219.89	0.0498895	0.245575	0.203154	0.839015	0.923787
ENSMUSG00000001440	KPNB1	17943.2	0.142893	0.128975	1.10791	0.2679	0.478294
ENSMUSG00000001441	NPEPPS	3214.45	0.203871	0.0909788	2.24087	0.0250348	0.095114
ENSMUSG00000001444	TBX21	43.457	0.176895	0.523645	0.337814	0.735503	0.861761
ENSMUSG00000001445	MRPL10	1919.95	-0.19198	0.124416	-1.54305	0.12282	0.288042
ENSMUSG00000001467	CYP51	2395.69	-0.249214	0.233986	-1.06508	0.28684	0.501221
ENSMUSG00000001472	TCF25	14013.4	-0.911701	0.118022	-7.72481	1.12018e-14	2.24036e-12
ENSMUSG00000001473	TUBB6	8.36653	-0.626208	0.512586	-1.22166	0.221835	0.423951
ENSMUSG00000001482	DEF8	2343.79	-0.602296	0.173369	-3.47408	0.000512614	0.00478649
ENSMUSG00000001493	MEOX1	0	NA	NA	NA	NA	NA
ENSMUSG00000001494	SOST	0	NA	NA	NA	NA	NA
ENSMUSG00000001496	NKX2-1	0	NA	NA	NA	NA	NA
ENSMUSG00000001497	PAX9	2.02793	-0.253173	0.649578	-0.38975	0.696721	NA
ENSMUSG00000001504	IRX2	0.464377	0.270986	0.442675	0.612155	0.540435	NA
ENSMUSG00000001506	COL1A1	29.7443	-1.28912	0.429772	-2.99955	0.00270375	0.0177176
ENSMUSG00000001507	ITGA3	78.3598	1.94995	0.381903	5.10587	3.2928e-07	1.03877e-05
ENSMUSG00000001508	SGCA	1.86537	-0.783134	0.666872	-1.17434	0.240259	NA
ENSMUSG00000001510	DLX3	0.492466	0	0.409137	0	1	NA
ENSMUSG00000001517	FOXM1	1882.93	0.489204	0.339113	1.4426	0.149134	0.32725
ENSMUSG00000001518	ITFG2	752.28	-0.237628	0.135207	-1.75752	0.0788292	0.211721
ENSMUSG00000001520	NRIP2	1.60875	0.340826	0.668438	0.509884	0.610133	NA
ENSMUSG00000001521	TULP3	410.133	-0.0164484	0.22289	-0.0737962	0.941173	0.973836
ENSMUSG00000001524	GTF2H4	864.677	-0.152539	0.179805	-0.848356	0.39624	0.611404
ENSMUSG00000001525	TUBB5	49811.6	0.0130729	0.159825	0.0817953	0.93481	0.971055
ENSMUSG00000001542	ELL2	122.73	1.01035	0.334543	3.02009	0.00252697	0.01684
ENSMUSG00000001552	JUP	493.17	-0.178822	0.555527	-0.321897	0.747531	0.868739
ENSMUSG00000001555	FKBP10	19.1733	-0.275258	0.624185	-0.440987	NA	NA
ENSMUSG00000001558	KLHL10	29.712	0.082622	0.335781	0.246059	0.805637	0.904383
ENSMUSG00000001566	MNX1	0.0264254	0	0.301474	0	1	NA
ENSMUSG00000001569	NOM1	2063.37	0.0676459	0.109777	0.616212	0.537755	0.730541
ENSMUSG00000001576	ERGIC1	4059.34	-0.532424	0.135437	-3.93117	8.45343e-05	0.00111502
ENSMUSG00000001583	TNK1	1.19985	-1.5831	0.661829	-2.392	0.0167568	NA
ENSMUSG00000001588	ACAP1	11342.4	-0.275621	0.173142	-1.59188	0.111412	0.27051
ENSMUSG00000001604	TCEA3	0.516852	0.144048	0.497459	0.289567	0.772147	NA
ENSMUSG00000001622	CSN3	0	NA	NA	NA	NA	NA
ENSMUSG00000001627	IFRD1	1004.73	1.16761	0.186364	6.26519	3.72373e-10	2.70657e-08
ENSMUSG00000001630	STK38L	309.384	0.846826	0.15195	5.57305	2.50315e-08	1.07609e-06
ENSMUSG00000001632	BRPF1	3133.89	0.116586	0.0906726	1.28579	0.198516	0.396479
ENSMUSG00000001642	AKR1B3	9154.54	-0.0352113	0.146904	-0.23969	0.810571	0.907611
ENSMUSG00000001655	HOXC13	0	NA	NA	NA	NA	NA
ENSMUSG00000001656	HOXC11	0	NA	NA	NA	NA	NA
ENSMUSG00000001657	HOXC8	0	NA	NA	NA	NA	NA
ENSMUSG00000001661	HOXC6	0	NA	NA	NA	NA	NA
ENSMUSG00000001663	GSTT1	6.79136	2.75629	0.590861	4.66488	3.08801e-06	7.20675e-05
ENSMUSG00000001665	GSTT3	164.929	-0.518983	0.229127	-2.26505	0.0235097	0.0909359
ENSMUSG00000001666	DDT	1179.85	0.2724	0.168553	1.61611	0.106071	0.260967
ENSMUSG00000001670	TAT	0	NA	NA	NA	NA	NA
ENSMUSG00000001672	MARVELD3	0.0309578	0	0.301474	0	1	NA
ENSMUSG00000001674	DDX18	3886.93	0.104117	0.133064	0.782464	0.433942	0.64444
ENSMUSG00000001687	UBL3	1352.34	0.437916	0.174099	2.51534	0.0118919	0.0550642
ENSMUSG00000001700	GRAMD3	66.124	2.7589	0.614137	4.49232	NA	NA
ENSMUSG00000001707	EEF1E1	1362.48	0.1516	0.18152	0.83517	0.403622	0.618027
ENSMUSG00000001729	AKT1	8321.97	-0.346595	0.149692	-2.31538	0.0205921	0.0821773
ENSMUSG00000001739	CLDN15	3.89644	1.82095	0.618245	2.94535	0.00322592	0.0203096
ENSMUSG00000001741	IL16	9219.36	-0.356784	0.157062	-2.27161	0.0231101	0.0897074
ENSMUSG00000001750	TCIRG1	1741.25	-0.0514034	0.165474	-0.310643	0.756072	0.87372
ENSMUSG00000001751	NAGLU	565.131	-1.18355	0.196355	-6.0276	1.66417e-09	1.01864e-07
ENSMUSG00000001755	COASY	1054.76	-0.162601	0.159417	-1.01997	0.30774	0.52361
ENSMUSG00000001761	SMO	5906.97	-0.330855	0.248756	-1.33004	0.183506	0.376871
ENSMUSG00000001763	TSPAN33	8.42562	-1.20144	0.500564	-2.40016	0.0163878	0.0695804
ENSMUSG00000001767	CRNKL1	2136.86	0.1345	0.120495	1.11623	0.264323	0.473874
ENSMUSG00000001768	RIN2	15.7021	0.0661304	0.37103	0.178234	0.858539	0.9346
ENSMUSG00000001773	FOLH1	0.0418921	0	0.301474	0	1	NA
ENSMUSG00000001774	CHORDC1	2748.67	0.224296	0.197979	1.13293	0.257244	0.465895
ENSMUSG00000001783	RTCB	6498.37	-0.182169	0.107831	-1.68939	0.0911445	0.233992
ENSMUSG00000001785	PWP1	2667.29	0.230293	0.111614	2.0633	0.0390845	0.130852
ENSMUSG00000001786	FBXO7	1579.5	-0.0457433	0.0972329	-0.470451	0.638033	0.800859
ENSMUSG00000001794	CAPNS1	7762.86	0.202099	0.198534	1.01796	0.308699	0.52465
ENSMUSG00000001802	LRP3	0.093726	0.0309717	0.301474	0.102734	0.918174	NA
ENSMUSG00000001804	DSG4	0	NA	NA	NA	NA	NA
ENSMUSG00000001815	EVX2	0	NA	NA	NA	NA	NA
ENSMUSG00000001819	HOXD13	0	NA	NA	NA	NA	NA
ENSMUSG00000001823	HOXD12	0	NA	NA	NA	NA	NA
ENSMUSG00000001827	FOLR1	0	NA	NA	NA	NA	NA
ENSMUSG00000001829	CLPB	1256.27	0.279625	0.11803	2.3691	0.0178315	0.0738505
ENSMUSG00000001833	SEPT7	6447.33	0.518871	0.210108	2.46954	0.0135287	0.0603614
ENSMUSG00000001844	ZDHHC4	1376.75	-0.0255029	0.130467	-0.195474	0.845022	0.927899
ENSMUSG00000001847	RAC1	9070.16	-0.242908	0.0888736	-2.73319	0.00627242	0.0339904
ENSMUSG00000001855	NUP214	4762.74	-0.2741	0.132071	-2.07539	0.0379501	0.12809
ENSMUSG00000001864	AIF1L	14.8297	1.10906	0.586725	1.89025	0.058725	0.172839
ENSMUSG00000001865	CPA3	9051.1	0.953691	0.53534	1.78147	0.0748364	0.204608
ENSMUSG00000001870	LTBP1	3.11802	0.177223	0.670035	0.264499	0.791395	0.896273
ENSMUSG00000001891	UGP2	937.856	0.234955	0.208037	1.12939	0.258734	0.467412
ENSMUSG00000001901	KCNH6	0.233394	0.0250705	0.301525	0.0831458	0.933736	NA
ENSMUSG00000001909	TRMT1	3355.47	0.0116173	0.173873	0.0668151	0.946729	0.976536
ENSMUSG00000001910	NACC1	9319.04	0.104375	0.157585	0.662341	0.507753	0.706581
ENSMUSG00000001911	NFIX	1339.72	-0.0760106	0.24847	-0.305915	0.75967	0.876117
ENSMUSG00000001918	SLC1A5	3542.11	-0.12095	0.118995	-1.01643	0.309426	0.525257
ENSMUSG00000001924	UBA1	24759.2	-0.0996778	0.142211	-0.700915	0.483356	0.687255
ENSMUSG00000001930	VWF	4.54865	0.49972	0.61239	0.816016	0.414491	0.627395
ENSMUSG00000001942	SIAE	1375.43	-0.342968	0.214135	-1.60164	0.109235	0.266608
ENSMUSG00000001943	VSIG2	0.507739	-0.15043	0.353626	-0.425392	0.670551	NA
ENSMUSG00000001946	ESAM	2.20164	0.635192	0.667679	0.951343	0.34143	0.557755
ENSMUSG00000001948	SPA17	21.7595	0.0211582	0.319968	0.0661261	0.947277	0.976809
ENSMUSG00000001962	FAM50A	1373.11	-0.0934803	0.0972579	-0.961159	0.336472	0.552911
ENSMUSG00000001964	EMD	2718.11	0.06795	0.152831	0.44461	0.656602	0.81196
ENSMUSG00000001983	TACO1	521.927	-0.211997	0.127951	-1.65686	0.0975475	0.245669
ENSMUSG00000001985	GRIK3	0	NA	NA	NA	NA	NA
ENSMUSG00000001986	GRIA3	1414.19	-0.0259651	0.261084	-0.0994512	0.92078	0.963757
ENSMUSG00000001988	NPAS1	0.457521	-0.280996	0.527219	-0.532978	0.594049	NA
ENSMUSG00000001995	SIPA1L2	283.205	-0.281531	0.318381	-0.884258	0.376557	0.593333
ENSMUSG00000001998	AP4E1	576.344	-0.154816	0.238107	-0.650196	0.515565	0.712689
ENSMUSG00000001999	BLVRA	565.023	-0.435048	0.134313	-3.23907	0.00119922	0.0095361
ENSMUSG00000002006	PDZD4	700.459	-0.72773	0.306758	-2.37233	0.0176763	0.0734555
ENSMUSG00000002007	SRPK3	0.193163	0	0.301474	0	1	NA
ENSMUSG00000002010	IDH3G	5089.86	-0.0298828	0.139684	-0.21393	0.830601	0.919386
ENSMUSG00000002012	PNCK	115.777	-1.47137	0.350934	-4.19273	2.75615e-05	0.000441807
ENSMUSG00000002014	SSR4	2616.95	-0.336078	0.163175	-2.05962	0.0394344	0.131381
ENSMUSG00000002015	BCAP31	4139.55	-0.0424048	0.106947	-0.396502	0.691735	0.83476
ENSMUSG00000002017	FAM98A	1540.71	0.231978	0.12759	1.81814	0.0690423	0.193661
ENSMUSG00000002020	LTBP2	0.303281	-0.152358	0.301581	-0.505197	0.613421	NA
ENSMUSG00000002028	KMT2A	11897.3	-0.270737	0.324229	-0.835017	0.403708	0.618075
ENSMUSG00000002031	IFT46	1294.28	-0.515566	0.135273	-3.81131	0.00013823	0.00165915
ENSMUSG00000002032	TMEM25	8.92855	0.595587	0.562769	1.05831	0.289912	0.504705
ENSMUSG00000002033	CD3G	36200.9	-0.948756	0.204869	-4.63104	3.6383e-06	8.31059e-05
ENSMUSG00000002043	TRAPPC6A	794.858	-0.748381	0.216747	-3.45278	0.000554847	0.00510614
ENSMUSG00000002052	SUPT6	7685.15	-0.108787	0.115444	-0.942335	0.346021	0.562431
ENSMUSG00000002055	SPAG5	1339.76	0.399797	0.342407	1.16761	0.242965	0.449089
ENSMUSG00000002057	FOXN1	4.67944	-1.42057	0.592696	-2.39679	0.0165395	0.0700687
ENSMUSG00000002058	UNC119	976.264	-0.128487	0.290966	-0.441587	0.658788	0.813936
ENSMUSG00000002059	RAB34	50.3814	-0.246846	0.48675	-0.507132	0.612062	0.782415
ENSMUSG00000002064	SDF2	1712.81	0.0617872	0.191486	0.322672	0.746943	0.86859
ENSMUSG00000002068	CCNE1	519.52	0.60034	0.305717	1.96371	0.0495638	0.15345
ENSMUSG00000002076	HSF2BP	46.3294	-0.60371	0.484903	-1.24501	0.213128	0.413887
ENSMUSG00000002083	BBC3	309.925	1.39759	0.286816	4.87276	1.1005e-06	2.91658e-05
ENSMUSG00000002100	MYBPC3	0.445642	0.175778	0.390502	0.450133	0.652614	NA
ENSMUSG00000002102	PSMC3	6607.42	-0.00817519	0.151704	-0.0538889	0.957024	0.982031
ENSMUSG00000002103	ACP2	1133.49	-0.532526	0.151638	-3.51183	0.000445036	0.00427155
ENSMUSG00000002104	RAPSN	266.201	1.45228	0.498924	2.91083	0.00360465	0.0221587
ENSMUSG00000002105	SLC39A13	208.668	0.305267	0.239031	1.2771	0.201566	0.400062
ENSMUSG00000002107	CELF2	8491.16	0.370554	0.191906	1.93091	0.0534938	0.162074
ENSMUSG00000002108	NR1H3	66.0248	0.0779972	0.310426	0.251259	0.801614	0.902104
ENSMUSG00000002109	DDB2	1091.09	-0.209778	0.123746	-1.69523	0.0900319	0.231805
ENSMUSG00000002111	SPI1	50.6636	-0.69392	0.406196	-1.70834	0.0875738	0.227568
ENSMUSG00000002129	SF3A1	8162.73	-0.267445	0.143098	-1.86896	0.0616277	0.178661
ENSMUSG00000002147	STAT6	7569.57	0.0692805	0.147339	0.47021	0.638205	0.801016
ENSMUSG00000002190	CLGN	1.17811	0.51501	0.657713	0.783032	0.433608	NA
ENSMUSG00000002204	NAPSA	519.772	1.0351	0.429237	2.41148	0.0158879	0.06786
ENSMUSG00000002205	VRK3	2868.24	-0.220755	0.151919	-1.45311	0.146192	0.322579
ENSMUSG00000002210	SMG9	1322.67	-0.244727	0.172107	-1.42194	0.155043	0.336328
ENSMUSG00000002221	PAXIP1	1962.25	0.220431	0.149613	1.47334	0.140659	0.314526
ENSMUSG00000002222	RMND5A	5502.51	0.296177	0.24517	1.20805	0.227029	0.430244
ENSMUSG00000002227	MOV10	2585.06	-0.00711401	0.213429	-0.033332	0.97341	0.989635
ENSMUSG00000002228	PPM1J	23.7748	0.420755	0.600711	0.700428	0.48366	0.687522
ENSMUSG00000002233	RHOC	26.3863	-0.961498	0.611649	-1.57198	0.115956	0.277429
ENSMUSG00000002240	PRR27	0	NA	NA	NA	NA	NA
ENSMUSG00000002249	TEAD3	20.0829	-1.02684	0.481776	-2.13136	0.0330598	0.116165
ENSMUSG00000002250	PPARD	1048.19	-0.506977	0.182587	-2.77664	0.00549243	0.030682
ENSMUSG00000002257	DEF6	8108.43	-0.492723	0.161872	-3.04389	0.00233537	0.0158768
ENSMUSG00000002265	PEG3	0.444141	0.0437606	0.389719	0.112288	0.910595	NA
ENSMUSG00000002266	ZIM1	0.0296678	0	0.301474	0	1	NA
ENSMUSG00000002274	METRN	1249.22	-0.164871	0.20248	-0.814257	0.415498	0.628049
ENSMUSG00000002279	LMF1	698.229	-0.379556	0.18798	-2.01913	0.0434736	0.140659
ENSMUSG00000002280	NARFL	865.455	-0.113074	0.163578	-0.691254	0.489406	0.692769
ENSMUSG00000002289	ANGPTL4	558.668	-0.271412	0.265226	-1.02333	0.306154	0.522087
ENSMUSG00000002297	DBF4	1323.06	0.789588	0.279055	2.8295	0.00466207	0.0271087
ENSMUSG00000002307	DAXX	2629.85	-0.328793	0.13561	-2.42454	0.0153278	0.0662882
ENSMUSG00000002308	CD320	565.559	0.334822	0.215429	1.55421	0.120134	0.283873
ENSMUSG00000002319	IPO4	2983.2	0.0919697	0.23025	0.399435	0.689573	0.833262
ENSMUSG00000002320	TM9SF1	2073.75	-0.0199844	0.0772808	-0.258594	0.795948	0.898883
ENSMUSG00000002324	REC8	111.859	-1.27563	0.572017	-2.23006	0.0257432	0.0968679
ENSMUSG00000002325	IRF9	2854.4	-0.0813483	0.251775	-0.3231	0.74662	0.868481
ENSMUSG00000002326	GMPR2	818.6	-0.513995	0.0992812	-5.17717	2.25283e-07	7.35268e-06
ENSMUSG00000002329	MDP1	1606.17	-0.00124094	0.122777	-0.0101073	0.991936	0.998453
ENSMUSG00000002332	DHRS1	1298.36	-0.0437835	0.172855	-0.253296	0.800039	0.901206
ENSMUSG00000002341	NCAN	0.0269766	0	0.301474	0	1	NA
ENSMUSG00000002342	TMEM161A	1017.83	-0.317574	0.142943	-2.22168	0.0263049	0.0985503
ENSMUSG00000002343	ARMC6	405.807	0.131144	0.192119	0.682616	0.494849	0.697085
ENSMUSG00000002345	BORCS8	1107.67	-1.33797	0.146308	-9.14492	5.9672e-20	3.20737e-17
ENSMUSG00000002346	SLC25A42	202.991	-0.30847	0.229739	-1.3427	0.179369	0.371094
ENSMUSG00000002365	SNX9	535.153	-0.456641	0.278123	-1.64187	0.100618	0.251471
ENSMUSG00000002372	RANBP3	3732.68	-0.14823	0.125063	-1.18524	0.235922	0.440833
ENSMUSG00000002379	NDUFA11	1461.4	-0.56271	0.185912	-3.02676	0.00247187	0.0165755
ENSMUSG00000002384	BMP8B	1.95794	0.49331	0.661963	0.745224	0.456136	NA
ENSMUSG00000002393	NR2F6	384.26	1.73361	0.252454	6.86705	6.55443e-12	7.22668e-10
ENSMUSG00000002395	USE1	3453.46	-0.601746	0.196684	-3.05945	0.00221743	0.015262
ENSMUSG00000002396	OCEL1	688.405	-0.764865	0.155266	-4.92617	8.38554e-07	2.30539e-05
ENSMUSG00000002409	DYRK1B	1006.67	-0.600983	0.252219	-2.38278	0.0171824	0.0720987
ENSMUSG00000002413	BRAF	1143.46	0.367087	0.247728	1.48182	0.138389	0.311196
ENSMUSG00000002416	NDUFB2	982.006	-0.247437	0.178539	-1.3859	0.165777	0.351544
ENSMUSG00000002428	HLTF	1855.45	0.267588	0.196605	1.36105	0.173499	0.362687
ENSMUSG00000002455	PRPF6	3657.25	-0.0914986	0.0767484	-1.19219	0.233187	0.437534
ENSMUSG00000002458	RGS19	2149.56	-0.260403	0.137139	-1.89883	0.0575865	0.170388
ENSMUSG00000002459	RGS20	0.300985	-0.0637646	0.301648	-0.211387	NA	NA
ENSMUSG00000002475	ABHD3	1.31846	0.228737	0.655729	0.348829	0.727218	NA
ENSMUSG00000002477	SNRPD1	3286.03	0.0605932	0.1998	0.303269	0.761685	0.877376
ENSMUSG00000002486	TCHP	508.239	-0.319969	0.166488	-1.92188	0.0546215	0.164246
ENSMUSG00000002489	TIAM1	3183.47	-0.0165279	0.153963	-0.107349	0.914512	0.960841
ENSMUSG00000002496	TSC2	3828.28	-0.128588	0.135974	-0.945684	0.34431	0.560625
ENSMUSG00000002500	RPL3L	33.4791	-1.33394	0.496036	-2.68921	0.00716217	0.0375807
ENSMUSG00000002504	SLC9A3R2	18.2686	0.408253	0.452647	0.901924	0.367097	0.585015
ENSMUSG00000002524	PUF60	6583.48	-0.220686	0.136007	-1.6226	0.104675	0.258419
ENSMUSG00000002546	GOLGA2	2467.84	-0.24341	0.115927	-2.09969	0.0357559	0.122804
ENSMUSG00000002550	UCK1	2287.34	-0.402879	0.124292	-3.24139	0.00118949	0.00948502
ENSMUSG00000002565	SCIN	4775.31	0.0362582	0.408786	0.0886973	0.929322	0.968337
ENSMUSG00000002578	IKZF4	598.461	-0.582275	0.21877	-2.66158	0.00777751	0.0399206
ENSMUSG00000002580	MIEN1	1899.21	-0.361556	0.196204	-1.84276	0.0653639	0.186183
ENSMUSG00000002588	PON1	0.0328834	0	0.301474	0	1	NA
ENSMUSG00000002602	AXL	694.212	-0.431263	0.194703	-2.21497	0.0267619	0.0996761
ENSMUSG00000002603	TGFB1	9384.24	0.499286	0.217169	2.29907	0.0215009	0.0850347
ENSMUSG00000002608	CCDC97	2710.71	-0.586842	0.179225	-3.27433	0.00105911	0.00866569
ENSMUSG00000002617	ZFP40	209.218	0.58129	0.345049	1.68466	0.0920546	0.235616
ENSMUSG00000002625	AKAP8L	1173.01	-0.842643	0.165099	-5.10388	3.32765e-07	1.04254e-05
ENSMUSG00000002633	SHH	0	NA	NA	NA	NA	NA
ENSMUSG00000002635	PDCD2L	669.974	-0.0264701	0.156612	-0.169018	0.865783	0.937927
ENSMUSG00000002658	GTF2F1	3203.95	0.00819086	0.138381	0.0591907	0.9528	0.97986
ENSMUSG00000002660	CLPP	1193.91	0.101705	0.171209	0.594042	0.552484	0.741705
ENSMUSG00000002661	ALKBH7	427.989	0.0347347	0.206341	0.168336	0.866319	0.938035
ENSMUSG00000002664	PSPN	0.0395512	0	0.301474	0	1	NA
ENSMUSG00000002668	DENND1C	1134.95	-1.47261	0.309291	-4.76124	1.9241e-06	4.74134e-05
ENSMUSG00000002679	MED6	410.035	0.0973979	0.192954	0.504774	0.613718	0.782966
ENSMUSG00000002688	PRKD1	0.0490141	0.0763354	0.301474	0.253208	0.800108	NA
ENSMUSG00000002699	LCP2	15611.7	0.467219	0.165765	2.81857	0.00482384	0.0278143
ENSMUSG00000002718	CSE1L	4743.76	0.444279	0.215179	2.0647	0.0389516	0.130496
ENSMUSG00000002728	NAA20	1175.69	0.0995963	0.135305	0.736089	0.461677	0.668646
ENSMUSG00000002731	PRKRA	609.646	0.0862501	0.137825	0.625795	0.531449	0.72524
ENSMUSG00000002732	FKBP7	63.8341	0.441293	0.208395	2.11758	0.0342109	0.119043
ENSMUSG00000002733	PLEKHA3	667.841	0.290071	0.146243	1.98349	0.0473126	0.148445
ENSMUSG00000002741	YKT6	3164.34	-0.233104	0.11245	-2.07296	0.0381763	0.128701
ENSMUSG00000002748	BAZ1B	9234.06	0.158812	0.146941	1.08078	0.279794	0.492273
ENSMUSG00000002763	PEX6	3909.63	-0.177319	0.211674	-0.837698	0.4022	0.61663
ENSMUSG00000002767	MRPL2	1453.79	-0.241379	0.169284	-1.42588	0.153903	0.334529
ENSMUSG00000002768	MEA1	1555.37	-0.097236	0.199562	-0.487246	0.626084	0.792453
ENSMUSG00000002769	GNMT	4.32372	0.552544	0.632925	0.873	0.382663	0.599545
ENSMUSG00000002771	GRIN2D	10.6175	1.02524	0.465051	2.20459	0.0274832	0.101575
ENSMUSG00000002778	KDELR1	2642.88	-0.222904	0.157092	-1.41894	0.155917	0.33767
ENSMUSG00000002781	TMEM143	443.515	0.154778	0.165755	0.933772	0.350422	0.567431
ENSMUSG00000002791	PDXK-PS	6.45076	-1.01207	0.546356	-1.8524	0.0639682	0.183559
ENSMUSG00000002797	GGCT	194.293	0.450678	0.205663	2.19134	0.0284271	0.104023
ENSMUSG00000002799	JAG2	181.276	-0.670126	0.216967	-3.0886	0.002011	0.0142401
ENSMUSG00000002803	BTBD6	678.365	-0.278624	0.180246	-1.5458	0.122153	0.286947
ENSMUSG00000002804	NUDT14	717.939	-1.02324	0.186996	-5.47196	4.45074e-08	1.78029e-06
ENSMUSG00000002808	EPDR1	8.74855	-1.52037	0.623017	-2.44033	0.014674	0.0640837
ENSMUSG00000002812	FLII	7701.18	-0.218909	0.140186	-1.56156	0.118393	0.281497
ENSMUSG00000002814	TOP3A	1373.31	0.194589	0.106535	1.82654	0.0677697	0.191088
ENSMUSG00000002820	ATG4D	1128.22	-0.391107	0.194574	-2.01006	0.0444244	0.142662
ENSMUSG00000002825	QTRT1	501.348	-0.399318	0.179783	-2.22111	0.0263437	0.0986311
ENSMUSG00000002831	PLIN4	0.108847	-0.0553908	0.301474	-0.183733	0.854223	NA
ENSMUSG00000002833	HDGFRP2	3046.22	-0.124578	0.102552	-1.21478	0.224451	0.427584
ENSMUSG00000002835	CHAF1A	2605.13	0.0595213	0.269106	0.221181	0.824951	0.915903
ENSMUSG00000002844	ADPRH	3008.11	-0.104579	0.166932	-0.626473	0.531004	0.725151
ENSMUSG00000002845	TMEM39A	907.822	-0.0779147	0.106256	-0.733276	0.46339	0.669922
ENSMUSG00000002846	TIMMDC1	857.897	-0.170704	0.12993	-1.31381	0.188909	0.384281
ENSMUSG00000002847	PLA1A	3.25572	0.448929	0.666577	0.673484	0.500639	0.701164
ENSMUSG00000002870	MCM2	11251.5	-0.220322	0.232511	-0.947579	0.343344	0.559842
ENSMUSG00000002871	TPRA1	914.637	-0.385011	0.140998	-2.73061	0.00632182	0.0342473
ENSMUSG00000002881	NAB1	1959.55	0.385445	0.211088	1.82599	0.0678515	0.191256
ENSMUSG00000002885	ADGRE5	895.254	-0.328454	0.409081	-0.802907	0.422029	0.634186
ENSMUSG00000002897	IL17RA	7103.97	0.0314422	0.152627	0.206007	0.836785	0.922087
ENSMUSG00000002900	LAMB1	13.3331	-0.52009	0.661168	-0.786623	0.431503	0.642362
ENSMUSG00000002908	KCNN1	1.7927	-0.412263	0.671472	-0.613969	0.539236	NA
ENSMUSG00000002910	ARRDC2	342.571	-0.404758	0.16617	-2.43581	0.0148585	0.0647333
ENSMUSG00000002930	PPP1R17	0	NA	NA	NA	NA	NA
ENSMUSG00000002944	CD36	2.65559	0.0277768	0.665877	0.0417146	0.966726	0.986834
ENSMUSG00000002948	MAP2K7	3890.76	-0.0515906	0.155428	-0.331926	0.739945	0.864574
ENSMUSG00000002949	TIMM44	1819.25	-0.0823863	0.0822765	-1.00133	0.316665	0.532366
ENSMUSG00000002957	AP2A2	4750.05	0.200074	0.0968393	2.06604	0.0388246	0.130248
ENSMUSG00000002963	PNKP	1563.83	0.0139127	0.199999	0.069564	0.944541	0.975215
ENSMUSG00000002968	MED25	2472.19	-0.18943	0.162458	-1.16602	0.243604	0.449715
ENSMUSG00000002980	BCAM	121.799	1.64536	0.262181	6.27567	3.48135e-10	2.54833e-08
ENSMUSG00000002981	CLPTM1	4698.38	0.0189637	0.158406	0.119716	0.904708	0.955772
ENSMUSG00000002983	RELB	955.211	2.79026	0.232322	12.0103	3.13783e-33	6.74634e-30
ENSMUSG00000002984	TOMM40	2478.15	-0.323892	0.184445	-1.75604	0.0790817	0.212185
ENSMUSG00000002985	APOE	526.052	-0.301707	0.411774	-0.732701	0.463741	0.670001
ENSMUSG00000002992	APOC2	0.245963	-0.0678514	0.310829	-0.218292	0.827202	NA
ENSMUSG00000002996	HBP1	2677.82	0.21624	0.168924	1.2801	0.20051	0.398971
ENSMUSG00000002997	PRKAR2B	1118.53	-0.168802	0.254778	-0.662543	0.507623	0.706516
ENSMUSG00000003031	CDKN1B	2668.73	0.281898	0.154879	1.82012	0.0687414	0.193163
ENSMUSG00000003032	KLF4	32.3313	3.01344	0.42271	7.12886	1.01201e-12	1.299e-10
ENSMUSG00000003033	AP1M1	4440.69	-0.314782	0.144818	-2.17363	0.0297328	0.107143
ENSMUSG00000003037	RAB8A	5380.36	-0.407266	0.126165	-3.22803	0.00124646	0.00979437
ENSMUSG00000003038	HMGN2	16668	-0.0205526	0.242297	-0.0848243	0.932401	0.969908
ENSMUSG00000003039	FAM32A	3487.92	-0.230634	0.142517	-1.61828	0.105601	0.260146
ENSMUSG00000003051	ELF3	0.713707	0.359284	0.459421	0.782037	0.434193	NA
ENSMUSG00000003053	CYP2C29	0	NA	NA	NA	NA	NA
ENSMUSG00000003062	STARD3NL	567.022	-0.90462	0.161371	-5.60584	2.07242e-08	9.21074e-07
ENSMUSG00000003068	STK11	4105.44	-0.321717	0.115125	-2.7945	0.00519808	0.0293908
ENSMUSG00000003070	EFNA2	5.48729	-0.434623	0.614611	-0.707151	0.479473	0.683882
ENSMUSG00000003072	ATP5D	5775.47	-0.439767	0.196735	-2.23533	0.0253956	0.0959799
ENSMUSG00000003099	PPP5C	4571.89	0.0483392	0.138948	0.347895	0.727919	0.85741
ENSMUSG00000003119	CDK12	3486.85	0.047184	0.132951	0.354898	0.722666	0.854573
ENSMUSG00000003123	LIPE	594.4	0.248533	0.186651	1.33154	0.183013	0.376219
ENSMUSG00000003131	PAFAH1B2	3206.19	0.157878	0.103196	1.52989	0.126045	0.293048
ENSMUSG00000003134	TBC1D8	367.041	-0.680944	0.33793	-2.01505	0.0438995	0.141426
ENSMUSG00000003135	CNOT11	2377.75	0.20847	0.0948479	2.19794	0.0279534	0.102845
ENSMUSG00000003153	SLC2A3	2696.17	1.81829	0.205705	8.83929	9.63252e-19	4.73369e-16
ENSMUSG00000003154	FOXJ2	1405.23	0.827752	0.205057	4.03669	5.42098e-05	0.000773783
ENSMUSG00000003161	SRI	2961.54	-0.295537	0.131725	-2.24359	0.0248588	0.0947003
ENSMUSG00000003166	DGCR2	4170.27	-0.0206282	0.114139	-0.18073	0.85658	0.933708
ENSMUSG00000003184	IRF3	2656.75	-0.432985	0.129022	-3.3559	0.000791073	0.00683741
ENSMUSG00000003190	BCL2L12	979.117	-0.26295	0.156308	-1.68225	0.0925197	0.236721
ENSMUSG00000003198	ZFP959	286.733	0.811679	0.282161	2.87665	0.0040192	0.0242137
ENSMUSG00000003199	MPND	2209.28	0.273996	0.1621	1.6903	0.0909712	0.233713
ENSMUSG00000003200	SH3GL1	2745.68	-0.0359868	0.123498	-0.291395	0.770749	0.882204
ENSMUSG00000003206	EBI3	4.91953	0.303909	0.574867	0.52866	0.597041	0.772291
ENSMUSG00000003208	CCDC94	713.035	-0.285995	0.154927	-1.846	0.064892	0.185375
ENSMUSG00000003226	RANBP2	8615.61	0.625203	0.263823	2.36979	0.0177984	0.073823
ENSMUSG00000003227	EDAR	3.95789	0.384665	0.665841	0.577713	0.563458	0.749302
ENSMUSG00000003228	GRK5	287.279	2.23382	0.204601	10.918	9.45998e-28	9.57127e-25
ENSMUSG00000003233	DVL3	1007.33	0.345563	0.167982	2.05715	0.0396719	0.131856
ENSMUSG00000003234	ABCF3	1905.98	-0.449792	0.123415	-3.64455	0.000267861	0.00285985
ENSMUSG00000003235	EIF2B5	3152.21	-0.185885	0.138733	-1.33987	0.180286	0.372305
ENSMUSG00000003269	CYTH2	2073.55	-0.016688	0.157196	-0.10616	0.915455	0.961119
ENSMUSG00000003271	SULT2B1	96.3456	-0.694781	0.294557	-2.35873	0.0183374	0.0754194
ENSMUSG00000003273	CAR11	13.41	2.62865	0.551604	4.76547	1.88411e-06	4.66956e-05
ENSMUSG00000003279	DLGAP1	0.123402	-0.0150378	0.301474	-0.0498809	0.960217	NA
ENSMUSG00000003282	PLAG1	24.0275	0.392772	0.418674	0.938132	0.348177	0.564806
ENSMUSG00000003283	HCK	31.8584	-0.017155	0.424199	-0.040441	0.967742	0.987115
ENSMUSG00000003299	MRPL4	1889.31	-0.301778	0.177959	-1.69578	0.0899283	0.231656
ENSMUSG00000003308	KEAP1	3216.4	-0.270406	0.114977	-2.35183	0.0186813	0.0763385
ENSMUSG00000003309	AP1M2	19.4689	-1.10263	0.455187	-2.42237	0.0154198	0.0666217
ENSMUSG00000003316	GLG1	5886.94	0.403397	0.120122	3.35824	0.000784411	0.0068021
ENSMUSG00000003341	ATP8B3	3.3698	-0.0421424	0.596533	-0.0706455	0.94368	0.974618
ENSMUSG00000003344	BTBD2	2748.59	-0.175537	0.181412	-0.967616	0.333236	0.549283
ENSMUSG00000003345	CSNK1G2	8364.16	-0.454088	0.154185	-2.94508	0.00322867	0.0203195
ENSMUSG00000003346	ABHD17A	2526.83	-0.352142	0.206195	-1.70781	0.0876722	0.227703
ENSMUSG00000003348	MOB3A	9162.3	0.450641	0.238974	1.88573	0.059331	0.174224
ENSMUSG00000003352	CACNB3	121.173	-0.0832961	0.439494	-0.189527	NA	NA
ENSMUSG00000003354	CCDC65	0.461811	0.147462	0.355235	0.415112	0.67806	NA
ENSMUSG00000003355	FKBP11	15.9759	-1.3896	0.451363	-3.07867	0.0020793	0.0146038
ENSMUSG00000003360	DDX23	4669.15	-0.0186407	0.0946398	-0.196965	0.843855	0.927491
ENSMUSG00000003363	PLD3	8409.55	0.226048	0.295871	0.764008	0.444863	0.653405
ENSMUSG00000003378	GRIK5	289.923	-0.293563	0.363348	-0.807938	0.419126	0.63153
ENSMUSG00000003379	CD79A	4.99852	-0.461891	0.662289	-0.697416	NA	NA
ENSMUSG00000003380	RABAC1	2290.88	0.332267	0.199458	1.66585	0.0957431	0.242566
ENSMUSG00000003382	ETV3	4369.86	0.803524	0.205102	3.91767	8.94082e-05	0.00115923
ENSMUSG00000003402	PRKCSH	5086.64	-0.253278	0.166345	-1.52261	0.127856	0.295807
ENSMUSG00000003410	ELAVL3	4.31589	-1.85802	0.642764	-2.89067	0.00384425	0.0233478
ENSMUSG00000003411	RAB3B	1.22737	1.00603	0.647343	1.5541	0.120161	NA
ENSMUSG00000003418	ST8SIA6	31.6434	1.48857	0.587175	2.53514	0.0112404	0.052838
ENSMUSG00000003420	FCGRT	21.437	-0.424865	0.47973	-0.885634	0.375815	0.592812
ENSMUSG00000003421	NOSIP	2329.28	-0.0939132	0.165148	-0.56866	0.569587	0.754145
ENSMUSG00000003423	PIH1D1	1373.05	-0.270322	0.157959	-1.71134	0.0870186	0.226673
ENSMUSG00000003429	RPS11	42833.8	-0.597629	0.147668	-4.04712	5.1852e-05	0.000747575
ENSMUSG00000003435	SUPT5	9238.5	-0.149615	0.124538	-1.20136	0.22961	0.433025
ENSMUSG00000003436	DLL3	0.401644	0.138349	0.441109	0.313638	0.753796	NA
ENSMUSG00000003437	PAF1	2324.45	-0.0759129	0.116977	-0.648958	0.516366	0.713036
ENSMUSG00000003438	TIMM50	1878.35	0.0033181	0.191583	0.0173194	0.986182	0.995521
ENSMUSG00000003444	MED29	646.334	-0.611677	0.187128	-3.26876	0.00108021	0.00879718
ENSMUSG00000003452	BICD1	76.6517	0.467329	0.466325	1.00215	0.316269	0.532116
ENSMUSG00000003458	NCSTN	3406.62	-0.303959	0.152369	-1.99489	0.0460554	0.145777
ENSMUSG00000003464	PEX19	2054.33	-0.532192	0.110226	-4.8282	1.37774e-06	3.55279e-05
ENSMUSG00000003469	PHYHIP	1.09154	-1.0614	0.657857	-1.61341	0.106654	NA
ENSMUSG00000003476	CRHR2	0	NA	NA	NA	NA	NA
ENSMUSG00000003477	INMT	4.76422	-0.428733	0.60439	-0.709364	0.478099	0.68266
ENSMUSG00000003484	CYP4F18	1.89032	0.560744	0.669794	0.837189	0.402486	NA
ENSMUSG00000003500	IMPDH1	6382.61	-0.42154	0.164305	-2.5656	0.0102998	0.0492787
ENSMUSG00000003505	PSG18	0	NA	NA	NA	NA	NA
ENSMUSG00000003518	DUSP3	8.86288	0.533293	0.543358	0.981476	0.326358	0.542197
ENSMUSG00000003526	PRODH	513.189	-1.30944	0.374063	-3.50058	0.000464246	0.00441406
ENSMUSG00000003527	DGCR14	1385.02	-0.144055	0.174128	-0.827293	0.408071	0.622015
ENSMUSG00000003528	SLC25A1	1912.12	-0.294083	0.170007	-1.72983	0.0836615	0.220567
ENSMUSG00000003531	DGCR6	1119.37	-0.683287	0.208797	-3.2725	0.00106601	0.00869391
ENSMUSG00000003534	DDR1	9.1929	-1.44834	0.557002	-2.60024	0.00931591	0.0456506
ENSMUSG00000003541	IER3	66.0561	0.52202	0.415444	1.25654	0.208921	0.40909
ENSMUSG00000003545	FOSB	199.414	1.22264	0.361597	3.38122	0.000721658	0.00634263
ENSMUSG00000003546	KLC4	826.531	-0.134632	0.203627	-0.661171	0.508503	0.707282
ENSMUSG00000003549	ERCC1	742.083	-0.0736771	0.192064	-0.383606	0.70127	0.84125
ENSMUSG00000003555	CYP17A1	0	NA	NA	NA	NA	NA
ENSMUSG00000003559	AS3MT	755.357	-0.709929	0.271751	-2.61242	0.00899031	0.0443839
ENSMUSG00000003573	HOMER3	1243.07	-0.260519	0.13927	-1.87061	0.0613992	0.178119
ENSMUSG00000003575	CRTC1	2939.67	-0.0224689	0.174664	-0.128641	0.897642	0.952347
ENSMUSG00000003581	RNF215	450.275	0.169858	0.206595	0.822178	0.410976	0.624645
ENSMUSG00000003585	SEC14L2	28.0233	-0.422125	0.293725	-1.43714	0.150677	0.329642
ENSMUSG00000003604	AVEN	707.922	0.105826	0.0946799	1.11773	0.263683	0.472975
ENSMUSG00000003617	CP	1.57938	-0.114321	0.655854	-0.174309	0.861623	NA
ENSMUSG00000003623	CROT	1503.74	0.0103569	0.214138	0.0483658	0.961425	0.98414
ENSMUSG00000003644	RPS6KA1	6382.21	-0.755195	0.2562	-2.94767	0.00320177	0.0201945
ENSMUSG00000003657	CALB2	0	NA	NA	NA	NA	NA
ENSMUSG00000003660	SNRNP200	13041.6	-0.170854	0.0921591	-1.8539	0.0637528	0.183155
ENSMUSG00000003662	CIAO1	1770.27	-0.00361266	0.114595	-0.0315253	0.974851	0.990398
ENSMUSG00000003665	HAS1	0.0563155	0.0343122	0.301474	0.113815	0.909384	NA
ENSMUSG00000003680	TAF6L	1460.29	-0.202442	0.123652	-1.63719	0.101591	0.253132
ENSMUSG00000003721	INSIG2	504.592	0.157785	0.132416	1.19159	0.233423	0.437731
ENSMUSG00000003731	KPNA6	3311.14	-0.0661096	0.0897654	-0.736471	0.461444	0.668559
ENSMUSG00000003746	MAN1A	3010.53	0.729091	0.223311	3.26491	0.00109499	0.00888805
ENSMUSG00000003752	ITPKC	520.919	-0.209804	0.176625	-1.18785	0.234893	0.43953
ENSMUSG00000003762	COQ8B	600.753	-0.3696	0.194213	-1.90306	0.0570327	0.169365
ENSMUSG00000003778	BRD8	2481.28	0.205171	0.129499	1.58435	0.113115	0.273178
ENSMUSG00000003779	KIF20A	1994.27	0.275609	0.337558	0.816478	0.414227	0.627075
ENSMUSG00000003808	FARSA	2525.06	-0.112975	0.135418	-0.834269	0.404129	0.618435
ENSMUSG00000003809	GCDH	668.649	-0.792865	0.139403	-5.68758	1.28853e-08	6.1223e-07
ENSMUSG00000003810	MAST2	2355.99	0.408603	0.188264	2.17037	0.0299788	0.107738
ENSMUSG00000003812	DNASE2A	466.555	0.394751	0.130951	3.01449	0.00257408	0.0170811
ENSMUSG00000003813	RAD23A	2662.43	-0.249225	0.127698	-1.95167	0.0509771	0.156516
ENSMUSG00000003814	CALR	23907.3	0.360127	0.142135	2.5337	0.0112866	0.053012
ENSMUSG00000003824	SYCE2	1407.84	0.229986	0.300347	0.765734	0.443834	0.652678
ENSMUSG00000003847	NFAT5	2226.07	0.0434985	0.277626	0.15668	0.875497	0.943046
ENSMUSG00000003848	NOB1	2600.07	0.0196423	0.148694	0.132099	0.894906	0.951381
ENSMUSG00000003849	NQO1	50.5194	0.0859291	0.414357	0.207379	0.835714	0.921827
ENSMUSG00000003863	PPFIA3	2.27986	0.673533	0.667325	1.0093	0.31283	0.528858
ENSMUSG00000003865	GYS1	1113.58	-0.555879	0.174162	-3.19174	0.00141418	0.0108058
ENSMUSG00000003868	RUVBL2	3893.99	0.00352888	0.160933	0.0219277	0.982506	0.994045
ENSMUSG00000003872	LIN7B	1.2097	-0.0144404	0.6103	-0.0236612	0.981123	NA
ENSMUSG00000003873	BAX	1938.38	0.169196	0.153144	1.10481	0.26924	0.480038
ENSMUSG00000003882	IL7R	5378.02	0.770063	0.231069	3.33261	0.000860364	0.0073295
ENSMUSG00000003923	TFAM	2105.16	0.161937	0.150668	1.07479	0.282468	0.495814
ENSMUSG00000003929	ZFP81	910.055	0.471955	0.244432	1.93082	0.0535053	0.16208
ENSMUSG00000003934	EFNB3	38.6282	-0.131005	0.284111	-0.461103	0.644725	0.805626
ENSMUSG00000003948	MMD	2005.7	0.364678	0.216969	1.68079	0.092804	0.237075
ENSMUSG00000003949	HLF	11.0315	0.559714	0.520153	1.07606	0.281902	0.495121
ENSMUSG00000003955	FAM162A	1058.98	-0.258652	0.190075	-1.36079	0.17358	0.362746
ENSMUSG00000003970	RPL8	49856.4	-0.763672	0.170448	-4.48038	7.45087e-06	0.000150593
ENSMUSG00000003974	GRM3	0	NA	NA	NA	NA	NA
ENSMUSG00000003992	SSBP2	1573.62	-0.0167828	0.193946	-0.0865331	0.931043	0.969308
ENSMUSG00000004018	FANCL	359.576	-0.0771491	0.202193	-0.381562	0.702786	0.8423
ENSMUSG00000004031	BRINP2	0	NA	NA	NA	NA	NA
ENSMUSG00000004032	GSTM5	1.254	-0.0994352	0.653657	-0.152121	0.879091	NA
ENSMUSG00000004035	GSTM7	49.6388	0.167479	0.521988	0.320848	0.748326	0.86913
ENSMUSG00000004038	GSTM3	0	NA	NA	NA	NA	NA
ENSMUSG00000004040	STAT3	9957.35	0.252237	0.168553	1.49648	0.134529	0.305989
ENSMUSG00000004043	STAT5A	8862.19	-0.192211	0.12922	-1.48747	0.13689	0.309355
ENSMUSG00000004044	PTRF	15.1409	-0.302392	0.502415	-0.601878	0.547255	0.737628
ENSMUSG00000004054	MAP3K11	3680.91	-0.107023	0.190838	-0.560806	0.57493	0.757878
ENSMUSG00000004056	AKT2	7608.04	-0.499623	0.172736	-2.89241	0.00382294	0.023243
ENSMUSG00000004069	DNAJA3	1961.51	0.154607	0.100669	1.53579	0.12459	0.291201
ENSMUSG00000004070	HMOX2	3069.7	-0.315357	0.127604	-2.47137	0.0134595	0.0601307
ENSMUSG00000004071	CDIP1	1559.17	0.203912	0.134043	1.52124	0.1282	0.296256
ENSMUSG00000004085	MAP3K20	203.105	-0.0592333	0.41887	-0.141412	0.887545	0.948597
ENSMUSG00000004096	CWC15	2687.91	-0.203149	0.133191	-1.52524	0.127198	0.294694
ENSMUSG00000004098	COL5A3	0.270685	-0.15075	0.301474	-0.500044	0.617044	NA
ENSMUSG00000004099	DNMT1	18055.5	0.0690956	0.194916	0.35449	0.722972	0.85462
ENSMUSG00000004100	PPAN	2438.67	-0.25097	0.221547	-1.13281	0.257294	0.465937
ENSMUSG00000004105	ANGPTL2	3097.85	0.0210566	0.216402	0.0973032	0.922486	0.964772
ENSMUSG00000004110	CACNA1E	12.0782	-0.922718	0.647303	-1.42548	NA	NA
ENSMUSG00000004113	CACNA1B	0.624086	0.180785	0.458104	0.394638	0.69311	NA
ENSMUSG00000004127	TRMT10A	383.977	-0.420235	0.190499	-2.20597	0.0273861	0.101321
ENSMUSG00000004151	ETV1	36.2814	0.493658	0.534593	0.923428	0.355784	0.573093
ENSMUSG00000004187	KIFC2	117.114	0.054012	0.294676	0.183293	0.854569	0.932828
ENSMUSG00000004207	PSAP	21537.8	-0.410571	0.151202	-2.71537	0.00662015	0.0354173
ENSMUSG00000004221	IKBKG	1942.06	-0.0846444	0.132039	-0.641055	0.521487	0.717247
ENSMUSG00000004231	PAX2	0.312127	-0.285255	0.301486	-0.946164	0.344065	NA
ENSMUSG00000004233	WARS2	391.752	-0.167741	0.142683	-1.17562	0.239747	0.445295
ENSMUSG00000004263	ATN1	2336.61	-0.107011	0.238002	-0.449623	0.652982	0.810105
ENSMUSG00000004264	PHB2	7779.11	-0.301141	0.169893	-1.77254	0.0763056	0.207273
ENSMUSG00000004266	PTPN6	11633.8	-0.40827	0.20732	-1.96928	0.0489212	0.151995
ENSMUSG00000004267	ENO2	36.1271	2.73186	0.514392	5.31085	1.09118e-07	3.90193e-06
ENSMUSG00000004268	EMG1	4413.49	-0.815479	0.121106	-6.73358	1.65535e-11	1.66503e-09
ENSMUSG00000004270	LPCAT3	2088.59	-0.18037	0.160816	-1.12159	0.262036	0.470732
ENSMUSG00000004285	ATP6V1F	3319.36	-0.357216	0.174432	-2.04787	0.0405724	0.133789
ENSMUSG00000004296	IL12B	0.620598	0.3526	0.454374	0.776013	0.437741	NA
ENSMUSG00000004317	CLCN5	867.985	-0.240119	0.228871	-1.04915	0.294111	0.508593
ENSMUSG00000004319	CLCN3	2082.99	0.517897	0.189358	2.73502	0.00623774	0.0338665
ENSMUSG00000004328	HIF3A	454.282	-0.588355	0.22336	-2.63411	0.00843574	0.0423634
ENSMUSG00000004341	GPX6	0	NA	NA	NA	NA	NA
ENSMUSG00000004344	GPX5	0	NA	NA	NA	NA	NA
ENSMUSG00000004347	PDE1C	2.60116	-0.259297	0.668377	-0.38795	0.698053	0.839154
ENSMUSG00000004356	UTP20	3240.43	0.221116	0.20573	1.07479	0.282471	0.495814
ENSMUSG00000004359	SPIC	14.3784	0.76404	0.497713	1.5351	0.124758	0.291325
ENSMUSG00000004360	9330159F19RIK	0.0664731	0	0.301474	0	1	NA
ENSMUSG00000004364	CUL3	5216.9	0.570541	0.213544	2.67177	0.00754521	0.0390309
ENSMUSG00000004366	SST	0	NA	NA	NA	NA	NA
ENSMUSG00000004371	IL11	0.455085	0.207557	0.445586	0.465807	0.641354	NA
ENSMUSG00000004383	LARGE1	248.883	0.682311	0.290177	2.35136	0.0187049	0.076401
ENSMUSG00000004393	DDX56	2077.73	-0.332983	0.159368	-2.0894	0.0366722	0.125086
ENSMUSG00000004394	TMED4	1605.25	0.220961	0.104862	2.10717	0.035103	0.121142
ENSMUSG00000004415	COL26A1	0.640894	-0.0945269	0.493626	-0.191495	0.848138	NA
ENSMUSG00000004446	BID	906.834	-0.107171	0.193301	-0.554428	0.579286	0.76117
ENSMUSG00000004451	RALB	961.639	-0.537745	0.188513	-2.85256	0.00433683	0.0257307
ENSMUSG00000004455	PPP1CC	10486.2	0.211558	0.112133	1.88666	0.0592056	0.173985
ENSMUSG00000004460	DNAJB11	3052.09	0.241868	0.0970345	2.4926	0.0126812	0.0575303
ENSMUSG00000004462	TBCCD1	589.809	-0.0110406	0.0954111	-0.115716	0.907878	0.957301
ENSMUSG00000004473	CLEC11A	190.218	-0.72764	0.329184	-2.21044	0.0270747	0.100471
ENSMUSG00000004500	ZFP324	719.91	-0.3542	0.158074	-2.24072	0.0250442	0.095114
ENSMUSG00000004508	GAB2	556.484	0.955935	0.258722	3.69483	0.000220032	0.00243536
ENSMUSG00000004530	CORO1C	5802.67	-0.183687	0.1782	-1.03079	0.302641	0.518366
ENSMUSG00000004535	TAX1BP1	6659.45	0.543985	0.215815	2.52061	0.0117151	0.0544447
ENSMUSG00000004540	PSG17	4.27687	0.259035	0.310472	0.834326	NA	NA
ENSMUSG00000004542	PSG19	0.0423077	-0.0537205	0.301474	-0.178193	0.858571	NA
ENSMUSG00000004552	CTSE	5949.34	-0.554999	0.648834	-0.855378	0.392342	0.607625
ENSMUSG00000004558	NDRG2	398.775	0.17983	0.303994	0.591559	0.554146	0.743125
ENSMUSG00000004561	METTL17	876.794	0.0667101	0.115898	0.575596	0.564889	0.750393
ENSMUSG00000004562	ARHGEF40	318.037	1.43262	0.324129	4.4199	9.8746e-06	0.000188715
ENSMUSG00000004565	PNPLA6	847.778	0.690592	0.170485	4.05074	5.10567e-05	0.000738583
ENSMUSG00000004567	MCOLN1	789.305	-0.195832	0.176091	-1.11211	0.266092	0.476152
ENSMUSG00000004568	ARHGEF18	3696.81	-0.131004	0.25608	-0.511576	0.608948	0.780528
ENSMUSG00000004591	PKN2	2238.6	0.510067	0.198175	2.57383	0.010058	0.0483504
ENSMUSG00000004609	CD33	11.9252	-0.552761	0.462158	-1.19604	0.23168	0.435602
ENSMUSG00000004610	ETFB	2403.04	-0.559384	0.183437	-3.04947	0.00229247	0.0156719
ENSMUSG00000004612	NKG7	6811	0.395891	0.286122	1.38364	0.166467	0.352572
ENSMUSG00000004613	LIM2	0	NA	NA	NA	NA	NA
ENSMUSG00000004626	STXBP2	3967.87	-0.526035	0.16932	-3.10675	0.00189155	0.0136015
ENSMUSG00000004630	PCP2	0.898594	-0.247179	0.599797	-0.412105	0.680263	NA
ENSMUSG00000004631	SGCE	0.564162	-0.251388	0.531329	-0.47313	0.63612	NA
ENSMUSG00000004633	CHN2	1124.01	-0.59487	0.551035	-1.07955	0.280342	0.492985
ENSMUSG00000004637	WWOX	746.038	-0.610622	0.22268	-2.74215	0.00610389	0.0333592
ENSMUSG00000004642	SLBP	4314.53	0.466652	0.224724	2.07656	0.0378426	0.127801
ENSMUSG00000004651	TYR	0	NA	NA	NA	NA	NA
ENSMUSG00000004654	GHRHR	0	NA	NA	NA	NA	NA
ENSMUSG00000004655	AQP1	2.4647	0.201187	0.670263	0.300162	0.764054	0.878634
ENSMUSG00000004661	ARID3B	665.615	-0.418232	0.191739	-2.18125	0.0291647	0.105807
ENSMUSG00000004665	CNN2	11031.2	-0.110978	0.275345	-0.403053	0.686909	0.831387
ENSMUSG00000004667	POLR2E	2312.41	-0.188097	0.159146	-1.18192	0.237239	0.442291
ENSMUSG00000004668	ABCA13	0.433722	-0.0870874	0.491939	-0.177029	0.859486	NA
ENSMUSG00000004677	MYO9B	7281.14	-0.0276401	0.130879	-0.211188	0.832741	0.92004
ENSMUSG00000004698	HDAC9	308.246	-0.28656	0.449465	-0.637557	0.523762	0.719029
ENSMUSG00000004707	LY9	2772.11	0.276156	0.239636	1.1524	0.249158	0.456196
ENSMUSG00000004709	CD244	93.9218	0.356412	0.551467	0.646298	0.518086	0.714373
ENSMUSG00000004730	ADGRE1	38.5329	0.362214	0.383447	0.944627	0.344849	0.561155
ENSMUSG00000004748	MTFP1	166.367	0.756895	0.237551	3.18624	0.00144137	0.0109648
ENSMUSG00000004768	RAB23	91.3483	0.932147	0.230295	4.04763	5.17393e-05	0.000747201
ENSMUSG00000004771	RAB11A	1558.65	0.413849	0.129338	3.19976	0.00137543	0.0105425
ENSMUSG00000004788	EIF2B2	2780.61	-0.165678	0.182212	-0.909262	0.363212	0.580738
ENSMUSG00000004789	DLST	4270.74	-0.251491	0.122543	-2.05226	0.0401446	0.132888
ENSMUSG00000004791	PGF	10.1257	-2.05198	0.50963	-4.02642	5.66326e-05	0.000801054
ENSMUSG00000004798	ULK2	1687.61	0.0222633	0.196763	0.113148	0.909913	0.958327
ENSMUSG00000004814	CCL24	0.580413	0.152112	0.302478	0.502886	0.615044	NA
ENSMUSG00000004815	DGKQ	530.438	-0.296619	0.154271	-1.92272	0.0545155	0.164085
ENSMUSG00000004821	TMED11	0	NA	NA	NA	NA	NA
ENSMUSG00000004837	GRAP	2355.2	-0.176998	0.223654	-0.791391	0.428716	0.640193
ENSMUSG00000004842	POU1F1	0.0841244	-0.0553908	0.301474	-0.183733	0.854223	NA
ENSMUSG00000004843	CHMP2B	1372.73	0.144469	0.168035	0.859757	0.389923	0.605241
ENSMUSG00000004846	PLOD3	850.489	0.119588	0.233804	0.511487	0.60901	0.78055
ENSMUSG00000004849	AP1S1	1897.05	-0.481446	0.147995	-3.25312	0.00114145	0.00918289
ENSMUSG00000004864	MAPK13	1.30665	-0.448849	0.656024	-0.684197	0.493851	NA
ENSMUSG00000004865	SRPK1	5366.15	0.0978743	0.143966	0.679843	0.496604	0.698093
ENSMUSG00000004872	PAX3	0.0296105	0	0.301474	0	1	NA
ENSMUSG00000004880	LBR	10578.3	0.332007	0.160264	2.07163	0.0383001	0.128966
ENSMUSG00000004885	CRABP2	1.70036	0.17314	0.670135	0.258366	0.796124	NA
ENSMUSG00000004891	NES	19.2661	0.60726	0.524682	1.15739	0.247114	0.453954
ENSMUSG00000004892	BCAN	0.499239	-0.332455	0.356235	-0.933246	0.350693	NA
ENSMUSG00000004894	HAPLN2	0.0563155	0.0343122	0.301474	0.113815	0.909384	NA
ENSMUSG00000004895	PRCC	2914.65	-0.0884836	0.158725	-0.557463	0.577211	0.759531
ENSMUSG00000004896	RRNAD1	668.024	-0.134345	0.135119	-0.994272	0.320091	0.535833
ENSMUSG00000004897	HDGF	12339.7	0.103385	0.157766	0.655309	0.512269	0.710108
ENSMUSG00000004902	SLC25A18	0.0619156	0	0.301474	0	1	NA
ENSMUSG00000004929	THOP1	1242.15	-0.396092	0.23687	-1.67219	0.0944874	0.240204
ENSMUSG00000004931	APBA3	903.988	-0.508496	0.219204	-2.31974	0.0203548	0.0814384
ENSMUSG00000004933	MATK	774.308	-0.222176	0.278724	-0.797117	0.425383	0.637167
ENSMUSG00000004934	PIAS4	1271.25	-0.203678	0.149897	-1.35879	0.174213	0.363812
ENSMUSG00000004936	MAP2K1	1953.31	0.333454	0.103159	3.23244	0.00122737	0.00968832
ENSMUSG00000004937	SGTA	2745.08	-0.565351	0.16941	-3.33717	0.000846354	0.00722446
ENSMUSG00000004939	NMRK2	0.0264254	0	0.301474	0	1	NA
ENSMUSG00000004945	TMEM242	3320.32	-0.645425	0.191188	-3.37586	0.000735863	0.00643725
ENSMUSG00000004947	DTX2	1309.21	0.293348	0.198596	1.47711	0.139646	0.313076
ENSMUSG00000004948	ZP3	0.0849964	0	0.301474	0	1	NA
ENSMUSG00000004951	HSPB1	0.246034	-0.0604015	0.301474	-0.200354	0.841204	NA
ENSMUSG00000004952	RASA4	1220.88	-0.76565	0.444968	-1.72069	0.0853078	0.223468
ENSMUSG00000004961	SYT5	8.87221	0.404978	0.605578	0.668746	0.503657	0.703215
ENSMUSG00000004980	HNRNPA2B1	27425.8	0.15908	0.192352	0.827024	0.408223	0.622082
ENSMUSG00000004988	FXYD4	1.42994	0	0.520954	0	1	NA
ENSMUSG00000004994	CCDC130	434.669	-0.368952	0.158407	-2.32914	0.0198515	0.0798142
ENSMUSG00000004996	MRI1	1511.61	-0.245566	0.173112	-1.41854	0.156033	0.337793
ENSMUSG00000005034	PRKACB	8737.42	-0.151508	0.177422	-0.853942	0.393137	0.608317
ENSMUSG00000005043	SGSH	1534.16	-0.441736	0.3213	-1.37484	0.169181	0.356564
ENSMUSG00000005045	CHD5	6.66482	1.47495	0.623727	2.36474	0.0180429	0.0744753
ENSMUSG00000005054	CSTB	1246.2	-0.478371	0.175021	-2.73322	0.00627187	0.0339904
ENSMUSG00000005057	SH2B2	130.436	-1.45285	0.396176	-3.66718	0.000245241	0.00265794
ENSMUSG00000005069	PEX5	2290.93	-0.195671	0.153681	-1.27323	0.202937	0.401995
ENSMUSG00000005078	JKAMP	570.743	-0.0973563	0.172414	-0.564664	0.572302	0.755937
ENSMUSG00000005087	CD44	199.262	0.779734	0.452886	1.7217	0.0851236	0.223156
ENSMUSG00000005089	SLC1A2	0.390909	-0.0460862	0.385184	-0.119647	0.904763	NA
ENSMUSG00000005102	EIF2AK4	851.774	-0.0529929	0.116029	-0.456722	0.647871	0.806913
ENSMUSG00000005103	WDR1	12093.3	-0.49293	0.152646	-3.22924	0.0012412	0.00978722
ENSMUSG00000005107	SLC2A9	620.304	-0.624314	0.202536	-3.08249	0.00205277	0.0144644
ENSMUSG00000005124	WISP1	0.0541748	0.032642	0.301474	0.108275	0.913778	NA
ENSMUSG00000005125	NDRG1	5440.95	-0.314632	0.325166	-0.967604	0.333242	0.549283
ENSMUSG00000005131	4930550C14RIK	8.10886	-0.426805	0.60675	-0.703428	0.481789	0.685991
ENSMUSG00000005142	MAN2B1	4938.84	-0.389705	0.164718	-2.36589	0.0179867	0.0743325
ENSMUSG00000005148	KLF5	1.82585	0.817039	0.666357	1.22613	0.22015	NA
ENSMUSG00000005150	WDR83	746.572	-0.348347	0.0871632	-3.99649	6.42886e-05	0.000893185
ENSMUSG00000005161	PRDX2	8513.27	-0.359065	0.184441	-1.94678	0.0515615	0.157792
ENSMUSG00000005198	POLR2A	20458.9	0.388338	0.119921	3.23828	0.00120253	0.00954915
ENSMUSG00000005202	SHBG	0	NA	NA	NA	NA	NA
ENSMUSG00000005204	SENP3	3983.66	0.198022	0.115751	1.71076	0.0871262	0.226839
ENSMUSG00000005220	CORIN	0.111665	-0.0133675	0.301474	-0.0443406	0.964633	NA
ENSMUSG00000005225	PLEKHA8	49.0791	1.23871	0.569492	2.17511	0.0296222	0.106993
ENSMUSG00000005232	G6PC2	0.024507	0.0343122	0.301474	0.113815	0.909384	NA
ENSMUSG00000005233	SPC25	772.529	0.88845	0.388288	2.28812	0.0221305	0.0867863
ENSMUSG00000005237	DNAH2	1.2151	-0.825181	0.591561	-1.39492	0.163039	NA
ENSMUSG00000005251	RIPK4	4.28111	1.13764	0.614549	1.85118	0.064143	0.183815
ENSMUSG00000005262	UFD1L	1623.67	0.00696415	0.0758334	0.0918348	0.926829	0.96697
ENSMUSG00000005267	ZFP287	181.086	-0.302822	0.204181	-1.48311	0.138046	0.310817
ENSMUSG00000005268	PRLR	1.23918	0.491275	0.63246	0.776769	0.437295	NA
ENSMUSG00000005299	LETM1	3611.75	0.387535	0.0972947	3.98311	6.80201e-05	0.000935208
ENSMUSG00000005312	UBQLN1	4788.25	-0.00449815	0.0865661	-0.0519621	0.958559	0.982868
ENSMUSG00000005320	FGFR4	0.275618	0.0759388	0.315003	0.241073	0.809498	NA
ENSMUSG00000005338	CADM3	0.199401	0	0.301474	0	1	NA
ENSMUSG00000005339	FCER1A	0.829273	0.0269619	0.303236	0.0889139	NA	NA
ENSMUSG00000005354	TXN2	3799.81	-0.490842	0.144205	-3.40378	0.0006646	0.00590756
ENSMUSG00000005355	CASP14	0	NA	NA	NA	NA	NA
ENSMUSG00000005357	SLC1A6	0.158866	0.072995	0.301474	0.242127	0.808682	NA
ENSMUSG00000005360	SLC1A3	5.78259	0.7257	0.567584	1.27858	0.201046	0.399629
ENSMUSG00000005362	CRBN	2270.11	0.436765	0.178988	2.4402	0.0146791	0.0640837
ENSMUSG00000005364	IL5RA	5.69119	0.247231	0.665141	0.371697	0.710118	0.846201
ENSMUSG00000005370	MSH6	6451.07	0.101053	0.147629	0.684503	0.493658	0.696168
ENSMUSG00000005371	FBXO11	1779.03	0.646914	0.228979	2.82521	0.00472495	0.027391
ENSMUSG00000005373	MLXIPL	1.73743	0.408561	0.645729	0.632712	0.526922	NA
ENSMUSG00000005374	TBL2	1627.45	0.207527	0.127497	1.6277	0.103588	0.256409
ENSMUSG00000005378	WBSCR22	1708.94	-0.135639	0.137791	-0.984375	0.324931	0.540504
ENSMUSG00000005397	NID1	1.98503	0.0816066	0.472453	0.17273	NA	NA
ENSMUSG00000005410	MCM5	10757.4	0.0890631	0.272876	0.326387	0.744132	0.866615
ENSMUSG00000005413	HMOX1	51.598	0.651194	0.283797	2.29458	0.0217573	0.0857333
ENSMUSG00000005417	MPRIP	7707.64	-0.639944	0.11216	-5.70561	1.15926e-08	5.58525e-07
ENSMUSG00000005442	CIC	8391.38	-0.183008	0.222031	-0.824246	0.4098	0.623431
ENSMUSG00000005447	PAFAH1B3	1385.84	-0.404977	0.172023	-2.3542	0.0185624	0.0759451
ENSMUSG00000005465	IL27RA	3272.62	-0.238384	0.166241	-1.43397	0.151582	0.330949
ENSMUSG00000005469	PRKACA	2898.25	-0.45043	0.144675	-3.11338	0.00184955	0.0133553
ENSMUSG00000005470	ASF1B	1613.51	0.0800645	0.314359	0.254691	0.798962	0.900947
ENSMUSG00000005474	MYL10	5905.84	-1.11135	0.380972	-2.91715	0.00353248	0.0218164
ENSMUSG00000005481	DDX39	3339.83	-0.341731	0.152298	-2.24384	0.0248429	0.0946664
ENSMUSG00000005483	DNAJB1	4444.05	0.76436	0.142322	5.37065	7.84516e-08	2.93341e-06
ENSMUSG00000005493	MSH4	0.778565	1.04321	0.625801	1.667	0.0955149	NA
ENSMUSG00000005501	USP40	597.389	-0.221271	0.249346	-0.887407	0.37486	0.591848
ENSMUSG00000005503	EVX1	0.109706	0	0.301474	0	1	NA
ENSMUSG00000005505	KBTBD4	1319.5	0.0855946	0.108692	0.787497	0.430991	0.642039
ENSMUSG00000005506	CELF1	6511.64	-0.126008	0.154154	-0.817415	0.413692	0.62675
ENSMUSG00000005510	NDUFS3	2344.64	-0.302544	0.140501	-2.15333	0.031293	0.111299
ENSMUSG00000005514	POR	3738.8	-0.20276	0.20822	-0.973777	0.330168	0.546124
ENSMUSG00000005533	IGF1R	1703.71	-0.467869	0.354271	-1.32065	0.186617	0.380807
ENSMUSG00000005534	INSR	1021.36	-0.348993	0.259155	-1.34666	0.17809	0.369383
ENSMUSG00000005540	FCER2A	0	NA	NA	NA	NA	NA
ENSMUSG00000005547	CYP2A5	0.282338	-0.239429	0.301474	-0.794195	0.427082	NA
ENSMUSG00000005553	ATP4A	2.37173	1.24644	0.662899	1.88029	0.0600683	0.17574
ENSMUSG00000005566	TRIM28	21519.8	-0.00831369	0.160901	-0.0516697	0.958792	0.982868
ENSMUSG00000005575	UBE2M	4801.58	0.0475852	0.148541	0.32035	0.748703	0.86913
ENSMUSG00000005580	ADCY9	62.6723	0.671188	0.46287	1.45006	0.147043	0.323774
ENSMUSG00000005583	MEF2C	520.259	0.21787	0.616426	0.35344	NA	NA
ENSMUSG00000005609	CTR9	3669.75	-0.0735599	0.0799749	-0.919787	0.357684	0.575091
ENSMUSG00000005610	EIF4G2	42932.5	0.145568	0.118443	1.22901	0.219066	0.421138
ENSMUSG00000005611	MRVI1	49.9902	-0.713159	0.527298	-1.35248	0.176222	0.36651
ENSMUSG00000005615	PCYT1A	1357.29	0.658064	0.253866	2.59217	0.00953718	0.0464044
ENSMUSG00000005621	ZFP592	4122.03	0.0581626	0.144163	0.40345	0.686617	0.831284
ENSMUSG00000005625	PSMD4	4303.32	-0.148854	0.137662	-1.0813	0.279565	0.492021
ENSMUSG00000005628	TMOD4	23.2587	0.561023	0.56451	0.993823	0.320309	0.535995
ENSMUSG00000005640	INSRR	0.566263	0.289226	0.459725	0.62913	0.529264	NA
ENSMUSG00000005649	CABP5	0.0289605	0	0.301474	0	1	NA
ENSMUSG00000005656	SNX6	2360.47	-0.0747781	0.169363	-0.441526	0.658832	0.813936
ENSMUSG00000005667	MTHFD2	1999.15	0.624709	0.173518	3.60024	0.00031792	0.00330406
ENSMUSG00000005672	KIT	2134.61	0.816474	0.38653	2.11232	0.034659	0.119995
ENSMUSG00000005674	TOMM40L	1213.75	-0.173259	0.156582	-1.10651	0.268506	0.479077
ENSMUSG00000005677	NR1I3	7.6686	0.332653	0.499639	0.665785	0.505548	0.705226
ENSMUSG00000005681	APOA2	13.0172	0.622307	0.442942	1.40494	0.16004	0.343988
ENSMUSG00000005682	PAN2	1687.84	-0.317441	0.110004	-2.88571	0.00390529	0.0236435
ENSMUSG00000005683	CS	9097.64	-0.0191144	0.0834615	-0.22902	0.818853	0.911721
ENSMUSG00000005686	AMPD3	139.516	-0.943236	0.341613	-2.76112	0.00576033	0.0318988
ENSMUSG00000005687	BCAS2	1891.49	-0.0410035	0.121567	-0.337292	0.735897	0.86193
ENSMUSG00000005696	SH2D1A	2856.87	0.246845	0.228918	1.07831	0.280895	0.493846
ENSMUSG00000005698	CTCF	7605.25	0.192995	0.12773	1.51096	0.130799	0.300161
ENSMUSG00000005699	PARD6A	330.817	0.137824	0.193894	0.710821	0.477195	0.682104
ENSMUSG00000005705	AGRP	11.4111	-0.69812	0.479936	-1.45461	0.145777	0.322093
ENSMUSG00000005716	PVALB	0	NA	NA	NA	NA	NA
ENSMUSG00000005718	TFAP4	1522.67	-0.111814	0.236634	-0.472521	0.636555	0.799471
ENSMUSG00000005732	RANBP1	5634.3	-0.156456	0.226074	-0.692058	0.488901	0.692391
ENSMUSG00000005763	CD247	12591.6	-0.414079	0.196548	-2.10675	0.0351392	0.121194
ENSMUSG00000005774	RFX5	1513.73	-0.205762	0.104295	-1.97289	0.0485077	0.151065
ENSMUSG00000005779	PSMB4	5337.32	-0.215003	0.170567	-1.26051	0.207484	0.407389
ENSMUSG00000005800	MMP8	0.264076	0	0.301578	0	1	NA
ENSMUSG00000005802	SLC30A4	1821.05	1.34694	0.259934	5.18185	2.19697e-07	7.18399e-06
ENSMUSG00000005803	SQRDL	164.142	0.337619	0.339029	0.995842	0.319327	0.535011
ENSMUSG00000005804	BLOC1S6	1284.11	0.0467274	0.100516	0.464874	0.642022	0.803637
ENSMUSG00000005813	METAP1	1650.36	0.187157	0.107169	1.74636	0.0807476	0.215137
ENSMUSG00000005823	GPR108	1350.27	0.0855852	0.146752	0.583196	0.559761	0.74658
ENSMUSG00000005824	TNFSF14	388.2	0.229386	0.318926	0.719245	0.47199	0.677265
ENSMUSG00000005836	GATA6	0.293859	0.0250705	0.301525	0.0831458	0.933736	NA
ENSMUSG00000005846	RSL1D1	5163.63	0.134971	0.204177	0.66105	0.50858	0.707332
ENSMUSG00000005864	CNGA2	0	NA	NA	NA	NA	NA
ENSMUSG00000005871	APC	2774.35	0.669497	0.219259	3.05345	0.00226229	0.0155087
ENSMUSG00000005873	REEP5	2653.47	0.0826421	0.197291	0.418885	0.6753	0.824077
ENSMUSG00000005881	ERGIC3	3406.73	-0.332771	0.187945	-1.77058	0.0766307	0.207665
ENSMUSG00000005882	UQCC1	1100.39	-0.250985	0.0959759	-2.61508	0.00892063	0.0441285
ENSMUSG00000005883	SPO11	173.789	-1.73733	0.337944	-5.14088	2.73454e-07	8.79142e-06
ENSMUSG00000005886	NCOA2	5587.16	-0.14972	0.168617	-0.887929	0.374579	0.591728
ENSMUSG00000005891	PRL4A1	0	NA	NA	NA	NA	NA
ENSMUSG00000005892	TRH	0.0264254	0	0.301474	0	1	NA
ENSMUSG00000005893	NR2C2	4435.59	0.103766	0.172987	0.599846	0.548609	0.738462
ENSMUSG00000005897	NR2C1	498.037	-0.502578	0.140906	-3.56676	0.000361416	0.00362047
ENSMUSG00000005899	SMPD4	2413.93	-0.0118827	0.160748	-0.0739216	0.941073	0.973836
ENSMUSG00000005907	PEX1	724.979	0.168177	0.10008	1.68043	0.0928731	0.237182
ENSMUSG00000005917	OTX1	0.695438	0	0.334018	0	1	NA
ENSMUSG00000005936	KCTD20	4040.8	-0.404167	0.0820467	-4.92606	8.39056e-07	2.30539e-05
ENSMUSG00000005947	ITGAE	1337.17	1.69355	0.407866	4.15222	3.29259e-05	0.000510204
ENSMUSG00000005949	CTNS	568.658	0.135866	0.162773	0.834692	0.403891	0.618219
ENSMUSG00000005950	P2RX5	1.17174	0.854869	0.624108	1.36974	0.170767	NA
ENSMUSG00000005951	SHPK	230.841	0.731649	0.183947	3.97749	6.96462e-05	0.000952238
ENSMUSG00000005952	TRPV1	0.0863122	0	0.301474	0	1	NA
ENSMUSG00000005958	EPHB3	3.75818	1.93067	0.636268	3.03437	0.0024104	0.0162139
ENSMUSG00000005968	TUFT1	113.449	1.02043	0.288878	3.53239	0.000411817	0.00401314
ENSMUSG00000005973	RCN1	1159.59	0.055409	0.15384	0.360172	0.718718	0.851609
ENSMUSG00000005980	DNASE1	3.84495	-0.442702	0.615357	-0.719423	0.47188	0.677243
ENSMUSG00000005981	TRAP1	5732.11	-0.0200034	0.129921	-0.153966	0.877636	0.943636
ENSMUSG00000005982	NAA60	3072.95	-0.0122775	0.146123	-0.0840214	0.933039	0.970036
ENSMUSG00000005983	1700037C18RIK	98.3599	-0.0294256	0.224219	-0.131236	0.895589	0.951537
ENSMUSG00000005986	ANKRD13D	308.661	-0.393083	0.174867	-2.2479	0.0245825	0.0940017
ENSMUSG00000005994	TYRP1	0	NA	NA	NA	NA	NA
ENSMUSG00000006005	TPR	7919.87	0.0822372	0.186754	0.440352	0.659682	0.814657
ENSMUSG00000006007	PDC	0	NA	NA	NA	NA	NA
ENSMUSG00000006010	BC003331	617.578	0.357738	0.196807	1.81771	0.0691089	0.193721
ENSMUSG00000006014	PRG4	21.736	0.0308658	0.670253	0.046051	0.96327	0.985149
ENSMUSG00000006019	DHX34	2211.78	0.298941	0.167475	1.78499	0.0742623	0.203375
ENSMUSG00000006021	KPTN	655.716	-0.107664	0.177713	-0.60583	0.544628	0.735464
ENSMUSG00000006024	NAPA	3613.18	-0.105285	0.124965	-0.842518	0.399498	0.614337
ENSMUSG00000006050	SRA1	1908.63	-0.170302	0.127207	-1.33878	0.180642	0.37281
ENSMUSG00000006056	CALCOCO2	0.0423077	-0.0537205	0.301474	-0.178193	0.858571	NA
ENSMUSG00000006057	ATP5G1	2951.97	-0.335021	0.190551	-1.75817	0.0787187	0.211457
ENSMUSG00000006058	SNF8	1487.87	-0.365816	0.104353	-3.50558	0.000455609	0.00435118
ENSMUSG00000006095	TBCB	1471.19	0.0954671	0.164373	0.580797	0.561377	0.747553
ENSMUSG00000006127	INPP5K	2448.57	-0.363412	0.167203	-2.17347	0.0297446	0.107143
ENSMUSG00000006134	CRKL	3606.26	0.204099	0.104138	1.95989	0.050009	0.154482
ENSMUSG00000006143	UPK3BL	0.780734	-0.29633	0.330189	-0.897455	0.369476	NA
ENSMUSG00000006154	EPS8L1	849.806	-0.415683	0.439198	-0.946459	0.343914	0.560217
ENSMUSG00000006169	CLINT1	6549.25	-0.0644575	0.118992	-0.541696	0.588028	0.767032
ENSMUSG00000006179	PRSS16	59.14	-0.281898	0.370271	-0.761328	0.446461	0.654713
ENSMUSG00000006191	CDKAL1	747.045	0.21394	0.0972925	2.19894	0.0278825	0.102628
ENSMUSG00000006200	RHOX6	0	NA	NA	NA	NA	NA
ENSMUSG00000006204	5430419D17RIK	0	NA	NA	NA	NA	NA
ENSMUSG00000006205	HTRA1	1.43158	-0.150289	0.653697	-0.229906	0.818165	NA
ENSMUSG00000006215	ZBTB17	2027.58	-0.186554	0.175852	-1.06086	0.288752	0.503298
ENSMUSG00000006216	CLCNKB	0.0296105	0	0.301474	0	1	NA
ENSMUSG00000006218	FAM131C	0.101453	-0.057061	0.301474	-0.189274	0.849878	NA
ENSMUSG00000006219	FBLIM1	7.23686	0.846136	0.583535	1.45002	0.147054	0.323774
ENSMUSG00000006221	HSPB7	1.38149	-0.263646	0.555575	-0.474547	0.63511	NA
ENSMUSG00000006235	EPOR	8.91231	-1.59673	0.582331	-2.74196	0.00610745	0.0333592
ENSMUSG00000006241	CCDC159	0.783693	-0.406479	0.620101	-0.655505	0.512143	NA
ENSMUSG00000006262	MOB1B	684.856	0.0511248	0.281172	0.181828	0.855718	0.933313
ENSMUSG00000006269	ATP6V1B1	0	NA	NA	NA	NA	NA
ENSMUSG00000006270	VAX1	0.0264254	0	0.301474	0	1	NA
ENSMUSG00000006273	ATP6V1B2	3142.01	-0.0930465	0.123513	-0.753335	0.451248	0.659507
ENSMUSG00000006276	EPS15L1	3444.43	-0.289738	0.117926	-2.45694	0.0140124	0.062021
ENSMUSG00000006281	TEP1	1245.56	-0.2937	0.177073	-1.65864	0.0971876	0.245154
ENSMUSG00000006288	TTC5	1680.31	-0.337414	0.155257	-2.17326	0.0297605	0.107178
ENSMUSG00000006289	OSGEP	2043.58	-0.0606971	0.134292	-0.45198	0.651284	0.809048
ENSMUSG00000006299	AAMP	6062.97	0.0165642	0.157159	0.105398	0.91606	0.961567
ENSMUSG00000006301	TMBIM1	252.061	-0.376392	0.183297	-2.05345	0.0400285	0.132606
ENSMUSG00000006304	ARPC2	12410	0.0187634	0.124326	0.150921	0.880038	0.94465
ENSMUSG00000006307	KMT2B	4793.61	-0.232501	0.205583	-1.13093	0.258084	0.46674
ENSMUSG00000006310	ZBTB32	1.10316	-0.169549	0.63481	-0.267086	0.789403	NA
ENSMUSG00000006311	ETV2	0.378938	0.136855	0.332142	0.412036	0.680313	NA
ENSMUSG00000006313	UPK1A	9.29636	0.417496	0.574671	0.726495	0.467535	0.673671
ENSMUSG00000006315	TMEM147	1405.86	-0.086113	0.176857	-0.486907	0.626324	0.792465
ENSMUSG00000006333	RPS9	54379.5	-0.600642	0.171006	-3.51241	0.000444064	0.0042654
ENSMUSG00000006335	TFPT	651.152	-0.0977235	0.115737	-0.844356	0.39847	0.613196
ENSMUSG00000006342	SUSD2	87.4178	0.142132	0.336359	0.42256	0.672616	0.822633
ENSMUSG00000006344	GGT5	124.419	-0.0892357	0.37536	-0.237734	0.812088	0.90836
ENSMUSG00000006345	GGT1	168.833	0.242271	0.627395	0.386154	0.699383	0.839923
ENSMUSG00000006356	CRIP2	239.459	1.47656	0.34253	4.31074	1.62707e-05	0.000285567
ENSMUSG00000006360	CRIP1	19710	-0.246293	0.221101	-1.11394	0.265306	0.475142
ENSMUSG00000006362	CBFA2T3	2890.63	-0.566915	0.267124	-2.12229	0.0338135	0.117994
ENSMUSG00000006369	FBLN1	23.0955	-1.11545	0.578478	-1.92825	0.0538246	0.162732
ENSMUSG00000006373	PGRMC1	2414.41	0.78763	0.154367	5.10233	3.35496e-07	1.04919e-05
ENSMUSG00000006378	GCAT	99.3951	-0.403869	0.389421	-1.0371	0.299689	0.515007
ENSMUSG00000006386	TEK	0.396654	-0.0726075	0.386983	-0.187625	0.851171	NA
ENSMUSG00000006389	MPL	2.93531	0.419555	0.621864	0.674674	0.499883	0.700904
ENSMUSG00000006390	ELOVL1	1795.88	-0.138482	0.178119	-0.77747	0.436882	0.646675
ENSMUSG00000006392	MED8	1108.59	-0.407917	0.0963771	-4.2325	2.31104e-05	0.000384056
ENSMUSG00000006395	HYI	239.282	-0.435545	0.178413	-2.44121	0.014638	0.0640321
ENSMUSG00000006398	CDC20	2274.18	0.16344	0.291851	0.560012	0.575471	0.758243
ENSMUSG00000006403	ADAMTS4	1.19173	-0.15034	0.616296	-0.243941	0.807277	NA
ENSMUSG00000006411	NECTIN4	9.47116	1.21439	0.518052	2.34415	0.0190703	0.0775801
ENSMUSG00000006412	PFDN2	1291.9	0.00514447	0.113613	0.0452807	0.963884	0.985529
ENSMUSG00000006418	RNF114	6086.4	-0.206096	0.204529	-1.00766	0.313618	0.52952
ENSMUSG00000006423	C330007P06RIK	1694.34	0.317243	0.204216	1.55346	0.120312	0.28416
ENSMUSG00000006435	NEURL1A	6.82529	-0.0233656	0.649308	-0.0359854	0.971294	0.988536
ENSMUSG00000006442	SRM	2835.83	-0.195028	0.286406	-0.680948	0.495904	0.697484
ENSMUSG00000006445	EPHA2	71.0675	-0.0028509	0.394952	-0.00721833	0.994241	0.99916
ENSMUSG00000006456	RBM14	3475.47	-0.111489	0.17436	-0.639421	0.522549	0.718166
ENSMUSG00000006457	ACTN3	19.1388	1.08582	0.427386	2.54062	0.0110657	0.0521593
ENSMUSG00000006462	A530013C23RIK	0.1098	0	0.301474	0	1	NA
ENSMUSG00000006463	ZDHHC24	313.631	-0.316142	0.189885	-1.66491	0.0959304	0.24279
ENSMUSG00000006464	BBS1	141.379	-0.602744	0.309465	-1.9477	0.0514512	0.157578
ENSMUSG00000006469	SLC34A3	0	NA	NA	NA	NA	NA
ENSMUSG00000006471	NDOR1	1874.79	-0.166737	0.147976	-1.12679	0.259831	0.468542
ENSMUSG00000006476	NSMF	452.53	-0.387332	0.240858	-1.60813	0.107806	0.263801
ENSMUSG00000006488	PRL7A1	0	NA	NA	NA	NA	NA
ENSMUSG00000006490	PRL8A9	0	NA	NA	NA	NA	NA
ENSMUSG00000006494	PDK1	3894.21	0.612545	0.130873	4.68047	2.86219e-06	6.77163e-05
ENSMUSG00000006498	PTBP1	22475.4	-0.267863	0.151817	-1.76439	0.077667	0.209582
ENSMUSG00000006517	MVD	801.853	-0.482602	0.230087	-2.09747	0.0359518	0.12328
ENSMUSG00000006519	CYBA	3705.85	0.272763	0.185239	1.47249	0.140888	0.314819
ENSMUSG00000006522	ITIH3	0	NA	NA	NA	NA	NA
ENSMUSG00000006526	TMEM110	502.971	-0.197922	0.136038	-1.4549	0.145698	0.322093
ENSMUSG00000006527	SFMBT1	1269.09	0.37446	0.166529	2.24861	0.0245373	0.0938496
ENSMUSG00000006529	ITIH1	0	NA	NA	NA	NA	NA
ENSMUSG00000006538	IHH	3.05778	1.18606	0.642472	1.84609	0.0648785	0.185367
ENSMUSG00000006542	PRKAG3	0.419888	-0.0768659	0.392611	-0.195781	0.844781	NA
ENSMUSG00000006546	CRYBA2	0	NA	NA	NA	NA	NA
ENSMUSG00000006567	ATP7B	24.5232	0.295687	0.485861	0.608582	0.542801	0.734649
ENSMUSG00000006570	DEFB2	0	NA	NA	NA	NA	NA
ENSMUSG00000006574	SLC4A1	0.572302	0.380354	0.489775	0.77659	0.437401	NA
ENSMUSG00000006575	RUNDC3A	125.59	-0.279558	0.420477	-0.664859	0.506141	0.705488
ENSMUSG00000006576	SLC4A3	0.254844	0.0250408	0.309861	0.0808131	0.935591	NA
ENSMUSG00000006585	CDT1	2873.1	0.281179	0.238392	1.17948	0.238208	0.443082
ENSMUSG00000006586	RUNX1T1	0	NA	NA	NA	NA	NA
ENSMUSG00000006587	SNAI3	750.055	0.296234	0.312821	0.946975	0.343652	0.55995
ENSMUSG00000006589	APRT	1619.39	-0.910355	0.219088	-4.1552	3.25009e-05	0.000504526
ENSMUSG00000006599	GTF2H1	1832.13	0.015628	0.137466	0.113687	0.909486	0.958175
ENSMUSG00000006611	HFE	49.7056	-0.794104	0.310851	-2.55461	0.0106306	0.0506357
ENSMUSG00000006638	ABHD1	119.147	-0.200172	0.367014	-0.545407	0.585474	0.765325
ENSMUSG00000006641	SLC5A6	725.891	0.447021	0.247315	1.8075	0.0706847	0.196808
ENSMUSG00000006642	TCF23	0.0269766	0	0.301474	0	1	NA
ENSMUSG00000006649	NPHS1	173.951	-0.550342	0.355438	-1.54835	0.121539	0.28617
ENSMUSG00000006651	APLP1	21.3879	-0.123041	0.615234	-0.199991	0.841488	0.925658
ENSMUSG00000006673	QRICH1	5334.23	-0.102618	0.0854258	-1.20125	0.229654	0.433025
ENSMUSG00000006675	P4HTM	118.114	-0.15828	0.218685	-0.723783	0.469199	0.674797
ENSMUSG00000006676	USP19	6913.77	-0.202158	0.125834	-1.60655	0.108154	0.264465
ENSMUSG00000006678	POLA1	1895.77	0.30368	0.358275	0.847617	0.396651	0.611892
ENSMUSG00000006699	CDC42	13376.7	0.124396	0.109216	1.139	0.254705	0.463002
ENSMUSG00000006705	PKNOX1	2161.37	-0.382967	0.114516	-3.34421	0.00082516	0.00709235
ENSMUSG00000006711	D130043K22RIK	1.05615	1.02071	0.625271	1.63242	0.10259	NA
ENSMUSG00000006715	GMNN	1095.85	0.495101	0.294589	1.68065	0.0928306	0.237108
ENSMUSG00000006717	ACOT13	760.204	-0.269167	0.129984	-2.07076	0.0383813	0.12908
ENSMUSG00000006720	ZFP184	225.024	0.830585	0.290183	2.86227	0.00420613	0.0251811
ENSMUSG00000006724	CYP27B1	6.9427	0.373094	0.584533	0.638277	0.523293	0.718557
ENSMUSG00000006728	CDK4	13667.6	-0.189119	0.162563	-1.16336	0.244683	0.451223
ENSMUSG00000006731	B4GALNT1	9276.59	0.0277225	0.323288	0.0857518	0.931664	0.969602
ENSMUSG00000006732	METTL1	821.855	-0.112346	0.246845	-0.455129	0.649016	0.807748
ENSMUSG00000006736	TSPAN31	3123.11	-0.296464	0.177134	-1.67367	0.094195	0.239717
ENSMUSG00000006740	KIF5B	3861.38	0.391257	0.228142	1.71497	0.0863511	0.225343
ENSMUSG00000006763	SAAL1	939.892	-0.512641	0.0846554	-6.05562	1.39878e-09	8.81283e-08
ENSMUSG00000006764	TPH2	0.0309578	0	0.301474	0	1	NA
ENSMUSG00000006777	KRT23	0	NA	NA	NA	NA	NA
ENSMUSG00000006782	CNP	8746.02	-0.481464	0.157222	-3.06232	0.0021963	0.015153
ENSMUSG00000006784	TTC25	4.94185	0.468324	0.59044	0.793177	0.427675	0.639208
ENSMUSG00000006800	SULF2	32.4758	-0.155058	0.451882	-0.343139	0.731494	0.859758
ENSMUSG00000006818	SOD2	2539.7	0.265693	0.1258	2.11203	0.0346838	0.120056
ENSMUSG00000006850	TMCO6	652.871	-0.258262	0.15158	-1.7038	0.0884181	0.229069
ENSMUSG00000006906	STAMBP	1131.18	0.00876711	0.0854611	0.102586	0.918292	0.962544
ENSMUSG00000006920	EZH1	2205.81	-0.62436	0.199974	-3.12221	0.001795	0.0130601
ENSMUSG00000006930	HAP1	14.6227	-0.0602675	0.59531	-0.101237	0.919362	0.963015
ENSMUSG00000006931	P3H4	3.72011	0.141314	0.664961	0.212515	0.831705	0.919747
ENSMUSG00000006932	CTNNB1	11087.8	0.283945	0.0920031	3.08626	0.00202693	0.0143293
ENSMUSG00000006941	EIF1B	2431.88	0.0335713	0.135315	0.248098	0.804059	0.90326
ENSMUSG00000006948	KLK4	0	NA	NA	NA	NA	NA
ENSMUSG00000006958	CHRD	0.191616	0	0.301474	0	1	NA
ENSMUSG00000006998	PSMD2	8946.77	-0.182842	0.0940428	-1.94425	0.0518657	0.158387
ENSMUSG00000007021	SYNGR3	1.77689	0.587477	0.667232	0.880468	0.378606	NA
ENSMUSG00000007029	VARS	12205.7	0.191708	0.16728	1.14603	0.251784	0.459351
ENSMUSG00000007030	VWA7	7.18715	0.0518479	0.573201	0.0904533	0.927927	0.967411
ENSMUSG00000007033	HSPA1L	1.63914	0.862122	0.665236	1.29596	0.194988	NA
ENSMUSG00000007034	SLC44A4	0.182984	0.115018	0.301474	0.38152	0.702817	NA
ENSMUSG00000007035	MSH5	194.16	-0.532315	0.173059	-3.07592	0.00209852	0.0146845
ENSMUSG00000007036	ABHD16A	1912.31	-0.182998	0.138606	-1.32027	0.186743	0.381018
ENSMUSG00000007038	NEU1	1277.42	-0.489	0.139032	-3.51717	0.00043617	0.00420523
ENSMUSG00000007039	DDAH2	822.053	0.180779	0.317568	0.56926	0.56918	0.753957
ENSMUSG00000007041	CLIC1	11848.6	-0.344508	0.158629	-2.17179	0.0298715	0.107491
ENSMUSG00000007050	LSM2	1382.8	-0.0816921	0.197129	-0.414409	0.678574	0.826533
ENSMUSG00000007080	POLE	3232.01	0.371065	0.286757	1.29401	0.195664	0.39311
ENSMUSG00000007097	ATP1A2	1.33129	0	0.610628	0	1	NA
ENSMUSG00000007107	ATP1A4	0	NA	NA	NA	NA	NA
ENSMUSG00000007122	CASQ1	0.0745184	0	0.301474	0	1	NA
ENSMUSG00000007207	STX1A	99.3095	0.408289	0.47926	0.851915	0.394261	0.609457
ENSMUSG00000007209	CEACAM9	0.0423077	-0.0537205	0.301474	-0.178193	0.858571	NA
ENSMUSG00000007216	ZFP775	566.398	-0.932869	0.176479	-5.286	1.25022e-07	4.3781e-06
ENSMUSG00000007279	SCUBE2	0	NA	NA	NA	NA	NA
ENSMUSG00000007338	MRPL49	1564.1	-0.281978	0.111778	-2.52266	0.0116471	0.0542097
ENSMUSG00000007379	DENND2C	39.6837	1.04416	0.420378	2.48387	0.0129964	0.0585791
ENSMUSG00000007411	MARK3	2231.48	-0.0946646	0.0904804	-1.04624	0.295448	0.510109
ENSMUSG00000007415	GATAD1	2353.3	0.519451	0.101062	5.13992	2.74855e-07	8.80356e-06
ENSMUSG00000007440	PCDHA11	0	NA	NA	NA	NA	NA
ENSMUSG00000007457	2310003L06RIK	0	NA	NA	NA	NA	NA
ENSMUSG00000007458	M6PR	8259.78	0.11967	0.0860129	1.3913	0.164135	0.34943
ENSMUSG00000007476	LRRC8A	1319.51	0.144463	0.177465	0.814034	0.415626	0.628155
ENSMUSG00000007480	MC5R	4.09923	0.158367	0.664813	0.238212	0.811716	0.908185
ENSMUSG00000007564	PPP2R1A	8875.54	-0.389114	0.146653	-2.6533	0.00797083	0.0406579
ENSMUSG00000007570	FANCE	635.024	-0.432546	0.169014	-2.55924	0.0104902	0.0500783
ENSMUSG00000007589	TINF2	1252.14	0.307196	0.125073	2.45613	0.0140441	0.0621454
ENSMUSG00000007591	TSSK4	31.2455	-0.66614	0.365695	-1.82157	0.0685201	0.192659
ENSMUSG00000007594	HAPLN4	0.475408	0.101986	0.400174	0.254855	0.798835	NA
ENSMUSG00000007603	DUS3L	1567.3	0.304845	0.120697	2.52571	0.0115465	0.0538648
ENSMUSG00000007610	GTPBP3	722.287	-0.404662	0.131582	-3.07537	0.00210243	0.014694
ENSMUSG00000007613	TGFBR1	2149.74	0.0961606	0.29255	0.328698	0.742384	0.865872
ENSMUSG00000007617	HOMER1	436.227	1.64817	0.252499	6.52742	6.69108e-11	5.89618e-09
ENSMUSG00000007646	RAD51C	221.388	0.253591	0.262029	0.967797	0.333146	0.549283
ENSMUSG00000007653	GABRB2	0	NA	NA	NA	NA	NA
ENSMUSG00000007655	CAV1	0.78771	0	0.580026	0	1	NA
ENSMUSG00000007656	ARPP19	2169.25	-0.119341	0.156225	-0.763906	0.444923	0.653405
ENSMUSG00000007659	BCL2L1	1327.41	0.108595	0.20003	0.542892	0.587204	0.766364
ENSMUSG00000007670	KHSRP	6699.61	-0.00494104	0.164788	-0.0299843	0.97608	0.990634
ENSMUSG00000007682	DIO2	404.583	0.713337	0.310762	2.29544	0.0217078	0.0855774
ENSMUSG00000007721	CCDC124	1722.24	-0.0222855	0.206747	-0.107791	0.914161	0.960805
ENSMUSG00000007739	CCT4	9904.31	0.08351	0.133133	0.627268	0.530484	0.724728
ENSMUSG00000007777	0610009B22RIK	414.763	0.37971	0.163972	2.3157	0.0205746	0.0821266
ENSMUSG00000007783	CPT1C	3.66608	-0.377168	0.602319	-0.626193	0.531188	0.725151
ENSMUSG00000007805	TWIST2	0	NA	NA	NA	NA	NA
ENSMUSG00000007812	ZFP655	1599.22	0.515135	0.189778	2.71441	0.00663941	0.0354615
ENSMUSG00000007815	RHOA	18052.3	0.0546559	0.095402	0.572901	0.566712	0.752001
ENSMUSG00000007817	ZMIZ1	10517.7	-0.383039	0.155679	-2.46044	0.0138769	0.061516
ENSMUSG00000007827	ANKRD26	592.337	0.0804871	0.22588	0.356327	0.721595	0.853959
ENSMUSG00000007833	ALDH16A1	1920.99	-0.00547214	0.153015	-0.0357622	0.971472	0.9886
ENSMUSG00000007836	HNRNPA0	11985.9	0.184652	0.100589	1.8357	0.0664024	0.188251
ENSMUSG00000007837	PRRG2	111.28	0.767514	0.256107	2.99685	0.00272784	0.0178196
ENSMUSG00000007850	HNRNPH1	6896.38	-0.16506	0.245004	-0.673705	0.500499	0.701082
ENSMUSG00000007867	IFT43	10.3167	-1.35238	0.569705	-2.37382	0.0176052	0.073337
ENSMUSG00000007872	ID3	4478.64	0.328831	0.306675	1.07225	0.283609	0.49699
ENSMUSG00000007877	TCAP	2.33041	-0.673546	0.672327	-1.00181	0.316434	0.532186
ENSMUSG00000007880	ARID1A	18440.8	0.0813446	0.192612	0.422323	0.672789	0.822633
ENSMUSG00000007888	CRLF1	4.14335	0.233535	0.586831	0.397959	0.69066	0.833817
ENSMUSG00000007891	CTSD	13666.7	-0.446801	0.184764	-2.41822	0.0155965	0.0671245
ENSMUSG00000007892	RPLP1	37921.2	-0.593405	0.199031	-2.98147	0.00286871	0.0185426
ENSMUSG00000007907	CABS1	0	NA	NA	NA	NA	NA
ENSMUSG00000007908	HMGCLL1	0.668897	-0.558332	0.528904	-1.05564	0.291133	NA
ENSMUSG00000007944	TTC9B	1.3286	0.226332	0.663493	0.341122	0.733012	NA
ENSMUSG00000007946	PHOX2A	0	NA	NA	NA	NA	NA
ENSMUSG00000007950	ABHD8	5851.15	0.25868	0.222085	1.16478	0.244109	0.450502
ENSMUSG00000007987	IFT22	331.353	-0.545977	0.210745	-2.59069	0.00957826	0.0465384
ENSMUSG00000007989	FZD3	15.73	0.614767	0.464267	1.32417	0.185447	0.379523
ENSMUSG00000008028	1700008O03RIK	10.3677	0.507301	0.516216	0.982729	0.325741	0.541328
ENSMUSG00000008035	MID1IP1	920.357	0.357237	0.143063	2.49707	0.0125226	0.0571019
ENSMUSG00000008036	AP2S1	2931.56	-0.387369	0.163756	-2.36552	0.0180047	0.0743887
ENSMUSG00000008090	FGFRL1	272.621	0.462913	0.190809	2.42605	0.0152641	0.0661177
ENSMUSG00000008129	4930432K21RIK	137.626	-0.347022	0.199004	-1.74379	0.081195	0.216024
ENSMUSG00000008136	FHL2	480.598	-0.796198	0.29923	-2.66082	0.00779497	0.0399662
ENSMUSG00000008140	EMC10	4720.53	-0.232672	0.175613	-1.32491	0.185201	0.37922
ENSMUSG00000008153	CLSTN3	70.4377	-0.840024	0.486639	-1.72617	0.0843161	0.221817
ENSMUSG00000008167	FBXW9	297.53	0.097483	0.193176	0.504634	0.613816	0.782975
ENSMUSG00000008193	SPIB	553.997	-0.401518	0.582914	-0.688811	0.490942	0.694025
ENSMUSG00000008200	FNBP4	3479.54	0.0682535	0.177135	0.38532	0.7	0.840471
ENSMUSG00000008206	CERS4	350.44	0.894667	0.436686	2.04877	0.040485	0.133604
ENSMUSG00000008226	SCRN3	201.396	0.288644	0.177432	1.62679	0.103782	0.256841
ENSMUSG00000008301	PHAX	1603.24	0.074273	0.10454	0.710472	0.477412	0.682357
ENSMUSG00000008305	TLE1	562.131	1.12866	0.260583	4.33128	1.48244e-05	0.000264502
ENSMUSG00000008307	1700109H08RIK	61.4632	0.341654	0.424374	0.805077	0.420775	0.632911
ENSMUSG00000008318	RELT	922.176	0.623743	0.223747	2.78772	0.00530803	0.029797
ENSMUSG00000008333	SNRPB2	2335.25	0.251336	0.186673	1.3464	0.178174	0.369452
ENSMUSG00000008348	UBC	20490.4	-0.35533	0.149018	-2.38448	0.0171033	0.0718381
ENSMUSG00000008373	PRPF31	3175.67	-0.391258	0.144226	-2.71282	0.0066713	0.0355913
ENSMUSG00000008384	SERTAD1	627.047	0.897947	0.242847	3.69757	0.000217669	0.00241387
ENSMUSG00000008393	CARHSP1	1326.55	0.891656	0.309527	2.88071	0.00396783	0.023963
ENSMUSG00000008398	ELK3	2660.31	-0.655036	0.279875	-2.34046	0.0192602	0.0781127
ENSMUSG00000008429	HERPUD2	1246.6	0.179693	0.122618	1.46547	0.142792	0.317766
ENSMUSG00000008435	RDH13	650.198	0.424677	0.119867	3.54291	0.000395739	0.003894
ENSMUSG00000008438	ADAM21	2.56918	0.922094	0.668742	1.37885	0.167942	0.354995
ENSMUSG00000008450	NUTF2	939.306	-0.541282	0.177182	-3.05495	0.00225096	0.0154434
ENSMUSG00000008461	FUT1	0.155332	0.111714	0.301495	0.370533	0.710986	NA
ENSMUSG00000008475	ARPC5	8644.94	0.0904739	0.118517	0.763381	0.445236	0.653525
ENSMUSG00000008482	RNF151	1.44849	-0.713608	0.657254	-1.08574	0.277593	NA
ENSMUSG00000008489	ELAVL2	0.234957	-0.0604015	0.301474	-0.200354	0.841204	NA
ENSMUSG00000008496	POU2F2	155.755	1.11465	0.422918	2.63561	0.0083985	0.0422697
ENSMUSG00000008540	MGST1	30.357	0.400065	0.467225	0.856258	0.391855	0.607282
ENSMUSG00000008575	NFIB	3.21019	-0.69381	0.658637	-1.0534	0.292156	0.506551
ENSMUSG00000008590	HTR3B	0	NA	NA	NA	NA	NA
ENSMUSG00000008601	RAB25	2.44133	-0.89268	0.664622	-1.34314	0.179227	0.370897
ENSMUSG00000008604	UBQLN4	3570.46	0.1974	0.142926	1.38113	0.167239	0.353702
ENSMUSG00000008658	RBFOX1	0.142207	0.0293015	0.301474	0.0971942	0.922572	NA
ENSMUSG00000008668	RPS18	34760	-0.735614	0.169125	-4.34952	1.36437e-05	0.000246649
ENSMUSG00000008682	RPL10	8545.79	-0.339776	0.214253	-1.58586	0.11277	0.272729
ENSMUSG00000008683	RPS15A	27383	-0.522929	0.164406	-3.18072	0.00146909	0.0111363
ENSMUSG00000008690	NCAPH2	5978.27	-0.113908	0.168645	-0.675434	0.4994	0.700456
ENSMUSG00000008730	HIPK1	9388.73	0.237405	0.182266	1.30252	0.192738	0.389142
ENSMUSG00000008734	GPRC5B	321.842	-1.97515	0.469026	-4.21118	2.54037e-05	0.000415741
ENSMUSG00000008763	MAN1A2	2711.35	0.642726	0.141655	4.53725	5.69938e-06	0.000119402
ENSMUSG00000008789	CEACAM5	0	NA	NA	NA	NA	NA
ENSMUSG00000008813	TPPP2	0.123696	0	0.301474	0	1	NA
ENSMUSG00000008822	ACYP1	557.44	-0.942148	0.149959	-6.28272	3.32706e-10	2.46661e-08
ENSMUSG00000008843	CLDN13	0	NA	NA	NA	NA	NA
ENSMUSG00000008845	CD163	116.444	0.193117	0.26488	0.729074	0.465957	0.67241
ENSMUSG00000008855	HDAC5	1241.48	1.63882	0.219861	7.45386	9.06479e-14	1.47089e-11
ENSMUSG00000008859	RALA	1325.09	0.399659	0.150776	2.65068	0.00803295	0.040914
ENSMUSG00000008874	CLEC3A	0	NA	NA	NA	NA	NA
ENSMUSG00000008892	VDAC3	3896.45	0.178136	0.140358	1.26915	0.204388	0.403335
ENSMUSG00000008932	SLC1A7	0	NA	NA	NA	NA	NA
ENSMUSG00000008958	VPS72	2307.78	-0.144498	0.183342	-0.788134	0.430618	0.641878
ENSMUSG00000008976	GABPA	2344.78	0.161275	0.18112	0.890432	0.373234	0.590698
ENSMUSG00000008999	BMP7	288.389	0.369717	0.325408	1.13617	0.255887	0.464452
ENSMUSG00000009013	DYNLL1	5798.85	-0.203827	0.181589	-1.12247	0.261664	0.470333
ENSMUSG00000009030	PDCL	1417.97	0.594864	0.141461	4.20516	2.60901e-05	0.00042455
ENSMUSG00000009035	TMEM184B	1685.8	0.199095	0.177013	1.12475	0.260696	0.46933
ENSMUSG00000009047	GM5965	0	NA	NA	NA	NA	NA
ENSMUSG00000009070	RSPH14	0.070509	0	0.301474	0	1	NA
ENSMUSG00000009073	NF2	2894.35	-0.00145123	0.0959492	-0.015125	0.987932	0.996157
ENSMUSG00000009075	CABP7	5.86627	-0.149771	0.591449	-0.253227	0.800093	0.901206
ENSMUSG00000009076	ZMAT5	865.273	-0.0637017	0.193941	-0.32846	0.742564	0.865964
ENSMUSG00000009079	EWSR1	15076.6	-0.171406	0.119472	-1.4347	0.151372	0.330574
ENSMUSG00000009090	AP1B1	6876.53	-0.054422	0.184959	-0.294239	0.768575	0.880889
ENSMUSG00000009092	DERL3	27.8073	-0.270362	0.541593	-0.499197	0.617641	0.785698
ENSMUSG00000009093	GSTT4	0.973355	0.215389	0.640578	0.336242	0.736689	NA
ENSMUSG00000009097	TBX1	0.324223	0.0318459	0.379812	0.0838465	0.933179	NA
ENSMUSG00000009108	GNAT2	9.49749	-0.470741	0.550413	-0.85525	0.392413	0.607625
ENSMUSG00000009112	BCL2L13	3180.72	-0.0608486	0.0671358	-0.906351	0.36475	0.582534
ENSMUSG00000009114	2610028H24RIK	0.14594	0	0.301474	0	1	NA
ENSMUSG00000009115	SPATC1L	0.799734	-0.333703	0.510907	-0.653158	0.513654	NA
ENSMUSG00000009145	DQX1	68.531	-1.56451	0.31559	-4.95741	7.14391e-07	2.01766e-05
ENSMUSG00000009185	CCL8	6.59445	0.439431	0.524043	0.83854	0.401728	0.616224
ENSMUSG00000009207	LNPK	279.688	0.120663	0.270445	0.446165	0.655478	0.811336
ENSMUSG00000009210	PRR29	3.73825	-1.36434	0.653403	-2.08805	0.0367932	0.125315
ENSMUSG00000009214	TMEM8C	0.939298	-0.751214	0.463269	-1.62155	0.1049	NA
ENSMUSG00000009216	FAM163B	923.256	-4.90428	0.559847	-8.76004	1.95177e-18	8.83432e-16
ENSMUSG00000009246	TRPM5	1.59515	1.28772	0.663477	1.94087	0.0522742	NA
ENSMUSG00000009248	ASCL2	0.0992939	-0.0553908	0.301474	-0.183733	0.854223	NA
ENSMUSG00000009281	RARRES2	3.85577	-0.153724	0.642713	-0.239179	0.810966	0.907845
ENSMUSG00000009291	PTTG1IP	2444.72	0.168445	0.144019	1.1696	0.242162	0.448303
ENSMUSG00000009292	TRPM2	15.4846	0.182617	0.456607	0.399944	0.689198	0.832926
ENSMUSG00000009293	UBE2G2	1921.5	-0.179025	0.129125	-1.38645	0.165611	0.35132
ENSMUSG00000009350	MPO	16.6498	-0.410444	0.424865	-0.966058	0.334015	0.550188
ENSMUSG00000009356	LPO	0	NA	NA	NA	NA	NA
ENSMUSG00000009376	MET	6.6835	1.02244	0.58818	1.73831	0.0821566	0.217597
ENSMUSG00000009378	SLC16A12	0.452118	0	0.480204	0	1	NA
ENSMUSG00000009394	SYN2	0.3312	0.0177835	0.301696	0.0589451	0.952996	NA
ENSMUSG00000009406	ELK1	1041.71	-0.703437	0.191321	-3.67673	0.000236243	0.00258156
ENSMUSG00000009418	NAV1	99.8846	-0.177031	0.429418	-0.412259	0.68015	0.827494
ENSMUSG00000009470	TNPO1	6780.74	0.358862	0.198483	1.80803	0.0706025	0.196722
ENSMUSG00000009471	MYOD1	0.0788999	0	0.301474	0	1	NA
ENSMUSG00000009487	OTOG	0.0868815	0	0.301474	0	1	NA
ENSMUSG00000009535	RNMT	1666.67	0.386856	0.18282	2.11604	0.0343411	0.119399
ENSMUSG00000009545	KCNQ1	0.0400477	0	0.301474	0	1	NA
ENSMUSG00000009549	SRP14	3219.92	-0.260811	0.123793	-2.10683	0.0351325	0.121194
ENSMUSG00000009551	6330409D20RIK	0.0765375	-0.0553908	0.301474	-0.183733	0.854223	NA
ENSMUSG00000009555	CDK9	3927.65	-0.201927	0.101551	-1.98842	0.0467654	0.147347
ENSMUSG00000009563	TOR2A	2037.59	0.116082	0.178409	0.65065	0.515272	0.712492
ENSMUSG00000009566	FPGS	1333.9	0.104307	0.185684	0.561747	0.574288	0.757381
ENSMUSG00000009569	MKL2	1256.03	-0.317093	0.159933	-1.98266	0.0474057	0.148683
ENSMUSG00000009575	CBX5	8351.4	0.326935	0.29096	1.12364	0.261166	0.46983
ENSMUSG00000009580	ODAM	0	NA	NA	NA	NA	NA
ENSMUSG00000009585	APOBEC3	10908.1	0.277258	0.141665	1.95714	0.0503316	0.155172
ENSMUSG00000009588	ST6GALNAC1	5.11024	0.812187	0.664454	1.22234	0.22158	0.423558
ENSMUSG00000009596	TAF7L	0	NA	NA	NA	NA	NA
ENSMUSG00000009614	SARDH	17.1458	-3.386	0.527146	-6.42327	1.33381e-10	1.08696e-08
ENSMUSG00000009621	VAV2	1147.21	-0.73878	0.130058	-5.68039	1.34389e-08	6.29833e-07
ENSMUSG00000009628	TEX15	34.1411	1.21715	0.614605	1.98037	0.047662	0.149351
ENSMUSG00000009630	PPP2CB	3212.98	-0.0757044	0.0981493	-0.771318	0.440518	0.649765
ENSMUSG00000009633	G0S2	59.433	-1.71938	0.406479	-4.22993	2.33769e-05	0.00038811
ENSMUSG00000009640	DMAP1	1172.14	-0.277692	0.134749	-2.06081	0.0393214	0.131224
ENSMUSG00000009646	PLA2G12B	0.172567	0	0.301474	0	1	NA
ENSMUSG00000009647	MCU	659.312	-0.0836787	0.181324	-0.461486	0.64445	0.805626
ENSMUSG00000009654	OIT3	0.673619	0.0777318	0.467864	0.166142	0.868045	NA
ENSMUSG00000009670	TEX11	67.3487	0	0.403615	0	NA	NA
ENSMUSG00000009681	BCR	4812.88	0.0168759	0.173782	0.0971096	0.922639	0.964772
ENSMUSG00000009687	FXYD5	5550.46	-0.574118	0.222988	-2.57466	0.010034	0.0482483
ENSMUSG00000009731	KCND1	7.89226	0.222288	0.586169	0.379221	0.704524	0.843388
ENSMUSG00000009733	TFCP2	387.65	-0.991232	0.155869	-6.35941	2.02528e-10	1.54821e-08
ENSMUSG00000009734	POU6F2	0	NA	NA	NA	NA	NA
ENSMUSG00000009739	POU6F1	681.322	-0.950503	0.222365	-4.27452	1.91554e-05	0.00032816
ENSMUSG00000009741	UBP1	2552.01	0.37918	0.135642	2.79545	0.0051828	0.0293141
ENSMUSG00000009772	NUAK2	165.784	0.318105	0.218816	1.45375	0.146015	0.322394
ENSMUSG00000009828	ICK	1261.5	-0.0105012	0.129824	-0.0808881	0.935531	0.971379
ENSMUSG00000009863	SDHB	4801.41	0.173069	0.178567	0.969208	0.332441	0.548699
ENSMUSG00000009876	COX4I2	7.34004	1.08549	0.57776	1.87879	0.0602735	0.17613
ENSMUSG00000009894	SNAP47	766.205	-0.566659	0.191715	-2.95573	0.00311932	0.0197979
ENSMUSG00000009900	WNT3A	0	NA	NA	NA	NA	NA
ENSMUSG00000009905	KDSR	1218.96	0.604937	0.149173	4.05526	5.00782e-05	0.000726874
ENSMUSG00000009907	VPS4B	3892.73	0.336481	0.177178	1.89912	0.0575491	0.170385
ENSMUSG00000009927	RPS25	25061.1	-0.625933	0.16792	-3.72756	0.000193346	0.0021893
ENSMUSG00000009941	NXF2	17.7973	0.95765	0.407304	2.35119	0.0187134	0.0764176
ENSMUSG00000009995	TAZ	1192.85	-0.0458889	0.131397	-0.349238	0.726911	0.856693
ENSMUSG00000010021	KIF19A	1.64702	-0.518218	0.661136	-0.783829	0.43314	NA
ENSMUSG00000010025	ALDH3A2	972.935	-0.031401	0.172088	-0.182471	0.855213	0.933091
ENSMUSG00000010044	ZMYND10	12.6672	-0.573699	0.471986	-1.2155	0.224175	0.427178
ENSMUSG00000010045	TMEM115	1470.21	-0.322783	0.174747	-1.84714	0.0647267	0.185087
ENSMUSG00000010047	HYAL2	858.957	-0.0106869	0.205776	-0.0519348	0.958581	0.982868
ENSMUSG00000010048	IFRD2	1545.08	-0.254949	0.252882	-1.00817	0.313371	0.529208
ENSMUSG00000010051	HYAL1	34.8129	-0.19507	0.365973	-0.533016	0.594022	0.770352
ENSMUSG00000010054	TUSC2	1348.01	-0.197608	0.171914	-1.14946	0.250367	0.457511
ENSMUSG00000010057	NPRL2	1064.35	-0.329311	0.155717	-2.11481	0.034446	0.119603
ENSMUSG00000010064	SLC38A3	0.811926	-0.584412	0.578939	-1.00945	0.312757	NA
ENSMUSG00000010066	CACNA2D2	185.518	-0.935506	0.229193	-4.08174	4.46989e-05	0.000658238
ENSMUSG00000010067	RASSF1	1417.94	-0.619296	0.147982	-4.18493	2.8525e-05	0.000453448
ENSMUSG00000010080	EPN3	0.138639	-0.059377	0.301474	-0.196956	0.843862	NA
ENSMUSG00000010086	RNF112	0.398207	-0.286865	0.392229	-0.73137	0.464553	NA
ENSMUSG00000010095	SLC3A2	4386.59	0.572771	0.155333	3.68737	0.000226584	0.00249344
ENSMUSG00000010097	NXF1	7073.21	0.17001	0.0922434	1.84306	0.0653201	0.186134
ENSMUSG00000010110	STX5A	2577.25	-0.301726	0.131876	-2.28795	0.0221406	0.0868059
ENSMUSG00000010122	SLC47A1	0.049232	0	0.301474	0	1	NA
ENSMUSG00000010136	PIFO	0.0296678	0	0.301474	0	1	NA
ENSMUSG00000010142	TNFRSF13B	1758.16	-0.449584	0.138366	-3.24924	0.00115715	0.00927014
ENSMUSG00000010154	SPIRE2	51.9596	0.806117	0.450583	1.78905	0.0736065	0.202209
ENSMUSG00000010175	PROX1	4.51312	0.115034	0.636618	0.180695	0.856607	0.933708
ENSMUSG00000010205	RAVER1	10087.5	-0.366956	0.155841	-2.35469	0.0185382	0.0759363
ENSMUSG00000010277	2610507B11RIK	12817.7	-0.212705	0.0988291	-2.15225	0.0313774	0.111517
ENSMUSG00000010290	AI597479	822.204	0.336096	0.155331	2.16375	0.0304838	0.109119
ENSMUSG00000010307	TMEM86A	178.554	0.0430615	0.203414	0.211693	0.832346	0.919956
ENSMUSG00000010311	OPTC	0.0423077	-0.0537205	0.301474	-0.178193	0.858571	NA
ENSMUSG00000010342	TEX14	12.5268	-1.03997	0.561268	-1.85289	0.0638974	0.183448
ENSMUSG00000010358	IFI35	1383.08	-0.407277	0.209518	-1.94387	0.0519107	0.15845
ENSMUSG00000010362	RDM1	413.834	-0.26967	0.230113	-1.1719	0.241237	0.447023
ENSMUSG00000010376	NEDD8	2486.87	-0.264561	0.145744	-1.81524	0.0694865	0.194431
ENSMUSG00000010392	GOSR1	2487.59	-0.0138025	0.139438	-0.0989867	0.921149	0.963908
ENSMUSG00000010406	MRPL52	1247.43	-0.489982	0.216194	-2.26639	0.0234273	0.0906726
ENSMUSG00000010435	SPACA7	0	NA	NA	NA	NA	NA
ENSMUSG00000010453	KANSL3	3233.03	-0.1871	0.083752	-2.23397	0.0254848	0.0962111
ENSMUSG00000010461	EYA4	0.483037	-0.347759	0.443488	-0.784145	0.432955	NA
ENSMUSG00000010476	EBF3	0.420752	0.0287581	0.396938	0.0724499	0.942244	NA
ENSMUSG00000010492	UCKL1OS	5.16677	-0.706972	0.574336	-1.23094	0.218346	0.420397
ENSMUSG00000010505	MYT1	0.423639	0.184555	0.479549	0.384851	0.700348	NA
ENSMUSG00000010517	FAF1	2305.58	0.256598	0.111364	2.30413	0.0212153	0.0842536
ENSMUSG00000010529	GM266	7.60542	-3.71831	0.637567	-5.83203	5.47566e-09	2.85398e-07
ENSMUSG00000010538	TSACC	137.431	-0.163621	0.267983	-0.610564	0.541488	0.733701
ENSMUSG00000010554	METTL16	1546.13	0.0710472	0.16353	0.434459	0.663955	0.816766
ENSMUSG00000010592	DAZL	1.77198	0.0797976	0.67044	0.119023	0.905257	NA
ENSMUSG00000010601	APOL7A	0	NA	NA	NA	NA	NA
ENSMUSG00000010607	PIGYL	626.261	-0.136079	0.20389	-0.667415	0.504507	0.704164
ENSMUSG00000010608	RBM25	5251.68	0.193232	0.173041	1.11669	0.264128	0.473625
ENSMUSG00000010609	PSEN2	720.453	-0.149898	0.246349	-0.608477	0.542871	0.734649
ENSMUSG00000010651	ACAA1B	1.39602	-0.191565	0.570452	-0.335812	0.737012	NA
ENSMUSG00000010660	PLCD1	2.54506	-0.60799	0.649935	-0.935463	0.349549	0.566359
ENSMUSG00000010663	FADS1	2398.63	-0.240202	0.229492	-1.04667	0.295252	0.509873
ENSMUSG00000010721	LMBR1	105.093	-0.415753	0.33881	-1.2271	0.219786	0.421864
ENSMUSG00000010751	TNFRSF22	239.447	0.694947	0.221131	3.14269	0.00167404	0.0123648
ENSMUSG00000010755	CARS	1309.41	-0.0778883	0.161234	-0.483076	0.629042	0.794384
ENSMUSG00000010760	PHLDA2	0.194068	0.0276312	0.301474	0.0916539	0.926973	NA
ENSMUSG00000010796	ASZ1	0	NA	NA	NA	NA	NA
ENSMUSG00000010797	WNT2	0.160563	0	0.301474	0	1	NA
ENSMUSG00000010803	GABRA1	0	NA	NA	NA	NA	NA
ENSMUSG00000010825	GRID2IP	0.303138	0	0.301483	0	1	NA
ENSMUSG00000010830	KDELR3	1.31715	0.758131	0.650979	1.1646	0.24418	NA
ENSMUSG00000010841	1700006E09RIK	0	NA	NA	NA	NA	NA
ENSMUSG00000010911	APIP	437.376	-0.161343	0.168974	-0.954842	0.339657	0.555756
ENSMUSG00000010914	PDHX	826.675	0.176024	0.112561	1.56381	0.117863	0.280703
ENSMUSG00000010936	VAC14	2012.77	-0.0807506	0.122561	-0.658858	0.509987	0.708143
ENSMUSG00000011008	MCOLN2	944.701	0.611549	0.225651	2.71015	0.00672525	0.0358014
ENSMUSG00000011034	SLC5A1	0	NA	NA	NA	NA	NA
ENSMUSG00000011052	1700049J03RIK	0.103441	-0.0133675	0.301474	-0.0443406	0.964633	NA
ENSMUSG00000011096	AKT1S1	1401.83	0.0614002	0.173254	0.354395	0.723043	0.85462
ENSMUSG00000011114	TBRG1	3720.38	-0.286389	0.116787	-2.45222	0.0141977	0.0625996
ENSMUSG00000011118	PANX3	0	NA	NA	NA	NA	NA
ENSMUSG00000011148	ADSSL1	1138.5	-0.93087	0.287634	-3.2363	0.00121089	0.00958699
ENSMUSG00000011154	CFAP161	0.136252	0.0293015	0.301474	0.0971942	0.922572	NA
ENSMUSG00000011158	BRF1	2033.44	-0.418872	0.0769675	-5.44218	5.26311e-08	2.07152e-06
ENSMUSG00000011171	VIPR2	69.9066	-0.0590918	0.413638	-0.142859	0.886402	0.948061
ENSMUSG00000011179	ODC1	4689.78	0.447267	0.211718	2.11256	0.0346388	0.119973
ENSMUSG00000011254	THG1L	884.88	-0.0254296	0.153881	-0.165255	0.868743	0.939019
ENSMUSG00000011256	ADAM19	849.705	-0.676458	0.441009	-1.53389	0.125058	0.29162
ENSMUSG00000011257	PABPC4	4802.18	-0.342782	0.0943294	-3.63389	0.000279183	0.00296051
ENSMUSG00000011263	EXOC3L2	8.3923	0.499104	0.670292	0.744607	NA	NA
ENSMUSG00000011267	ZFP296	40.8187	0.549227	0.394049	1.3938	0.163377	0.348559
ENSMUSG00000011305	PLIN5	0	NA	NA	NA	NA	NA
ENSMUSG00000011306	SUGP1	2491.45	-0.177628	0.153826	-1.15474	0.248197	0.455128
ENSMUSG00000011349	DMRTC2	3.67304	0.113036	0.536672	0.210625	NA	NA
ENSMUSG00000011350	GM5893	0	NA	NA	NA	NA	NA
ENSMUSG00000011382	DHDH	81.6406	0.693457	0.27401	2.53077	0.0113813	0.0533039
ENSMUSG00000011427	ZFP790	875.015	0.423688	0.153085	2.76766	0.00564599	0.0313869
ENSMUSG00000011463	CPB1	9.34036	0.435031	0.660636	0.658503	0.510215	0.708403
ENSMUSG00000011486	SLC25A41	1.98833	-0.530617	0.672201	-0.789373	0.429894	NA
ENSMUSG00000011589	FSD1	3.81718	-0.26255	0.644625	-0.40729	0.683795	0.829661
ENSMUSG00000011632	PINLYP	0.584104	0.201232	0.50385	0.399389	0.689607	NA
ENSMUSG00000011658	FUZ	537.825	-0.42186	0.204416	-2.06374	0.0390426	0.13075
ENSMUSG00000011751	SPTBN4	21.9382	0.440305	0.49756	0.884928	0.376195	0.593162
ENSMUSG00000011752	PGAM1	6779.95	0.400755	0.148606	2.69676	0.00700176	0.0369176
ENSMUSG00000011831	EVI5	276.017	0.913915	0.256633	3.56118	0.000369196	0.00368041
ENSMUSG00000011832	EVI5L	817.383	-0.430038	0.186957	-2.3002	0.0214371	0.0848406
ENSMUSG00000011837	SNAPC2	954.612	-0.030844	0.19115	-0.16136	0.87181	0.940438
ENSMUSG00000011877	GIT1	3855.68	0.0388845	0.182706	0.212825	0.831463	0.91963
ENSMUSG00000011884	GLTP	4572.91	-0.447579	0.145835	-3.06908	0.00214721	0.0149583
ENSMUSG00000011958	BNIP2	2006.09	0.331369	0.129623	2.5564	0.0105762	0.0504186
ENSMUSG00000011960	CCNT1	3457.6	0.532011	0.184904	2.87723	0.00401187	0.0241781
ENSMUSG00000012017	SCARF2	2.14866	-0.326352	0.670071	-0.487041	0.626229	0.792462
ENSMUSG00000012042	4930579F01RIK	0	NA	NA	NA	NA	NA
ENSMUSG00000012076	BRMS1L	494.509	-0.119785	0.184475	-0.64933	0.516125	0.712926
ENSMUSG00000012114	MED15	2922.6	-0.270037	0.133607	-2.02112	0.0432671	0.140176
ENSMUSG00000012117	DHDDS	2318.87	-0.353789	0.113365	-3.12079	0.00180365	0.0131119
ENSMUSG00000012123	AIM1L	46.1203	-0.168151	0.491189	-0.342335	0.732099	0.860057
ENSMUSG00000012126	UBXN11	166.469	-0.584904	0.210871	-2.77375	0.00554138	0.0309052
ENSMUSG00000012187	MOGAT1	0.334408	-0.188565	0.332927	-0.566386	0.571132	NA
ENSMUSG00000012211	TEX22	1.09177	-0.762729	0.642344	-1.18742	0.235064	NA
ENSMUSG00000012282	WNT8A	2.63994	0.0173072	0.659339	0.0262493	0.979058	0.992246
ENSMUSG00000012296	TJAP1	1185.28	-0.105195	0.13403	-0.784866	0.432532	0.643293
ENSMUSG00000012350	EHF	4.09469	-0.0119493	0.578283	-0.0206635	0.983514	0.994246
ENSMUSG00000012396	NANOG	0.155927	0.072995	0.301474	0.242127	0.808682	NA
ENSMUSG00000012405	RPL15	21217.7	-0.515495	0.189548	-2.7196	0.00653603	0.0351273
ENSMUSG00000012422	TMEM167	2085.18	0.40018	0.203187	1.96952	0.0488932	0.151963
ENSMUSG00000012428	STEAP4	0.740818	-0.737569	0.520397	-1.41732	0.15639	NA
ENSMUSG00000012429	MPLKIP	1446.95	0.0588881	0.102863	0.57249	0.56699	0.752276
ENSMUSG00000012443	KIF11	3420.81	0.760584	0.391207	1.9442	0.0518718	0.158387
ENSMUSG00000012483	RPA3	1127.55	0.140577	0.211849	0.663574	0.506963	0.705939
ENSMUSG00000012519	MLKL	185.351	0.751854	0.253751	2.96296	0.00304699	0.0194176
ENSMUSG00000012520	PHOX2B	0	NA	NA	NA	NA	NA
ENSMUSG00000012535	TNPO3	3997.06	-0.00776743	0.122904	-0.0631994	0.949608	0.978156
ENSMUSG00000012609	TTLL5	1147.02	-0.3475	0.129418	-2.68511	0.00725067	0.0379085
ENSMUSG00000012640	ZFP715	854.261	0.652832	0.195297	3.34276	0.000829495	0.00710562
ENSMUSG00000012705	RETN	0.260854	-0.0240192	0.301548	-0.079653	0.936513	NA
ENSMUSG00000012777	ACPT	0.715989	0.0204734	0.558794	0.0366385	0.970773	NA
ENSMUSG00000012819	CDH23	738.135	-0.215341	0.393638	-0.547055	0.584341	0.764337
ENSMUSG00000012848	RPS5	32819.9	-0.552058	0.193284	-2.8562	0.00428747	0.0255436
ENSMUSG00000012889	PODNL1	807.028	1.06949	0.230284	4.64424	3.41324e-06	7.88023e-05
ENSMUSG00000013033	ADGRL1	2730.92	1.00758	0.156881	6.42259	1.33974e-10	1.08696e-08
ENSMUSG00000013076	AMOTL1	10.0449	-0.275775	0.538718	-0.51191	0.608714	0.780345
ENSMUSG00000013083	2200002J24RIK	0	NA	NA	NA	NA	NA
ENSMUSG00000013089	ETV5	5607.81	2.18043	0.308786	7.0613	1.64953e-12	1.97849e-10
ENSMUSG00000013091	TMEM190	0.100394	0	0.301474	0	1	NA
ENSMUSG00000013150	GFOD2	465.926	-0.142404	0.143792	-0.990343	0.322007	0.537459
ENSMUSG00000013155	ENKD1	464.838	0.00770635	0.255309	0.0301845	0.97592	0.990634
ENSMUSG00000013158	4933405L10RIK	3.19671	1.34193	0.610096	2.19954	0.0278398	0.102514
ENSMUSG00000013160	ATP6V0D1	3157.66	-0.155094	0.189009	-0.82056	0.411897	0.625353
ENSMUSG00000013236	PTPRS	6482.85	0.241539	0.173817	1.38961	0.164647	0.350053
ENSMUSG00000013275	SLC41A1	1326.74	-0.29221	0.247623	-1.18006	0.237976	0.442889
ENSMUSG00000013338	FER1L4	0.156653	0.0276312	0.301474	0.0916539	0.926973	NA
ENSMUSG00000013353	4931406B18RIK	0	NA	NA	NA	NA	NA
ENSMUSG00000013367	IGLON5	0.0566444	0	0.301474	0	1	NA
ENSMUSG00000013415	IGF2BP1	0	NA	NA	NA	NA	NA
ENSMUSG00000013418	B4GALNT2	257.575	1.29714	0.592607	2.18887	0.028606	0.104508
ENSMUSG00000013419	ZFP651	42.5518	2.3248	0.304041	7.64632	2.06818e-14	3.78432e-12
ENSMUSG00000013465	NELFB	3452.17	-0.347157	0.121316	-2.86159	0.00421517	0.0252177
ENSMUSG00000013483	CARD14	4.93315	-0.721916	0.639389	-1.12907	0.258868	0.467555
ENSMUSG00000013495	TMEM175	733.104	-0.362623	0.109556	-3.30994	0.000933165	0.00784862
ENSMUSG00000013523	BCAS1	29.4112	-1.31312	0.522054	-2.5153	0.0118932	0.0550642
ENSMUSG00000013539	TANGO2	432.016	-0.918224	0.14092	-6.51595	7.22325e-11	6.30659e-09
ENSMUSG00000013562	4833413E03RIK	2.79672	-0.489768	0.630849	-0.776363	0.437535	0.647195
ENSMUSG00000013584	ALDH1A2	0.55361	0.0652076	0.447616	0.145678	0.884176	NA
ENSMUSG00000013593	NDUFS2	5954.88	-0.112635	0.143702	-0.783807	0.433153	0.643759
ENSMUSG00000013611	SNX31	40.9838	-2.21706	0.49382	-4.48961	7.13546e-06	0.000145071
ENSMUSG00000013622	ATRAID	863.844	0.228714	0.148748	1.5376	0.124147	0.29052
ENSMUSG00000013629	CAD	8088.67	0.110431	0.207301	0.532711	0.594234	0.77051
ENSMUSG00000013643	LYPD8	0	NA	NA	NA	NA	NA
ENSMUSG00000013646	SH3BP5L	1139.96	-0.239242	0.135617	-1.7641	0.0777159	0.209615
ENSMUSG00000013653	1810065E05RIK	0.208256	0.110203	0.301529	0.36548	0.714753	NA
ENSMUSG00000013662	ATAD1	3232.58	0.515129	0.197106	2.61346	0.00896298	0.0442744
ENSMUSG00000013663	PTEN	8516.03	0.492905	0.246811	1.9971	0.0458143	0.145335
ENSMUSG00000013668	4933402N03RIK	0	NA	NA	NA	NA	NA
ENSMUSG00000013698	PEA15A	832.48	0.6447	0.358002	1.80083	0.0717301	0.198833
ENSMUSG00000013701	TIMM23	3330.94	0.0434226	0.153768	0.28239	0.777645	0.8868
ENSMUSG00000013707	TNFAIP8L2	925.003	0.0633197	0.381897	0.165803	0.868312	0.939019
ENSMUSG00000013736	TRNT1	1480.54	0.371131	0.209359	1.7727	0.0762785	0.207265
ENSMUSG00000013766	LY6G6E	0	NA	NA	NA	NA	NA
ENSMUSG00000013787	EHMT2	8557.69	0.199853	0.145044	1.37788	0.16824	0.355363
ENSMUSG00000013822	ELOF1	1433.65	-0.427245	0.157398	-2.71442	0.00663929	0.0354615
ENSMUSG00000013833	MED16	1776.54	-0.521066	0.154092	-3.38153	0.000720841	0.00633868
ENSMUSG00000013846	ST3GAL1	5867.69	-0.0622752	0.193361	-0.322067	0.747402	0.86872
ENSMUSG00000013858	TMEM259	2853.59	-0.0567531	0.176149	-0.322189	0.74731	0.868671
ENSMUSG00000013878	RNF170	594.342	0.129578	0.219425	0.590533	0.554834	0.743501
ENSMUSG00000013921	CLIP3	10.3057	-0.592247	0.611596	-0.968363	0.332863	0.548973
ENSMUSG00000013928	THAP8	3.55683	1.47618	0.659994	2.23666	0.0253088	0.0957992
ENSMUSG00000013936	MYL2	0	NA	NA	NA	NA	NA
ENSMUSG00000013973	DEDD	1385.6	0.0504989	0.118297	0.426882	0.669465	0.820376
ENSMUSG00000013974	MCEMP1	1.59185	0.184037	0.6635	0.277374	0.781493	NA
ENSMUSG00000013997	NIT1	1253.82	-0.408718	0.120435	-3.39367	0.000689618	0.00608903
ENSMUSG00000014030	PAX5	0.195238	-0.0604015	0.301474	-0.200354	0.841204	NA
ENSMUSG00000014039	PRDM15	1034.04	-0.142069	0.130972	-1.08473	0.278042	0.490289
ENSMUSG00000014074	RNF168	1569.84	0.361126	0.20756	1.73987	0.0818825	0.217346
ENSMUSG00000014075	TCTEX1D2	131.335	-0.0823716	0.272583	-0.302189	0.762508	0.877736
ENSMUSG00000014077	CHP1	4112.19	0.00731818	0.121985	0.0599924	0.952162	0.979438
ENSMUSG00000014104	SVAL2	0	NA	NA	NA	NA	NA
ENSMUSG00000014158	TRPV4	22.1342	-0.791609	0.510929	-1.54935	0.121297	0.285835
ENSMUSG00000014164	KLHL3	142.861	-0.696364	0.235276	-2.95978	0.00307861	0.0195829
ENSMUSG00000014177	TVP23B	668.383	0.473898	0.155631	3.04502	0.00232668	0.0158428
ENSMUSG00000014195	DNAJC7	7039.4	-0.634959	0.0998348	-6.3601	2.01626e-10	1.5482e-08
ENSMUSG00000014198	ZFP385C	0.9576	-0.413975	0.55761	-0.74241	0.457839	NA
ENSMUSG00000014226	CACYBP	3490.17	0.386747	0.2217	1.74446	0.0810786	0.215842
ENSMUSG00000014232	CLUAP1	1081.42	0.0965472	0.109671	0.880334	0.378678	0.595308
ENSMUSG00000014243	ZSWIM7	155.162	0.858771	0.221848	3.87099	0.000108396	0.00136088
ENSMUSG00000014245	PIGL	333.885	-0.520885	0.116825	-4.45866	8.24727e-06	0.000163614
ENSMUSG00000014294	NDUFA2	1365.99	-0.442432	0.200969	-2.20149	0.0277013	0.102205
ENSMUSG00000014301	PAM16	233.824	-0.681758	0.211268	-3.22698	0.00125103	0.00981649
ENSMUSG00000014303	GLIS2	256.853	1.37197	0.265476	5.16797	2.36649e-07	7.66548e-06
ENSMUSG00000014313	COX6C	4049.39	-0.0543204	0.155324	-0.349722	0.726547	0.856557
ENSMUSG00000014329	BICC1	0.222427	-0.0184982	0.302392	-0.061173	0.951221	NA
ENSMUSG00000014349	UBE2Z	3203.71	-0.0816487	0.113544	-0.719091	0.472085	0.677276
ENSMUSG00000014351	GIP	0	NA	NA	NA	NA	NA
ENSMUSG00000014353	TMEM87B	399.74	0.0326977	0.228814	0.142901	0.886368	0.948061
ENSMUSG00000014355	ANAPC1	7264.04	-0.0867958	0.10165	-0.853868	0.393178	0.608317
ENSMUSG00000014361	MERTK	10.7616	-0.22456	0.51806	-0.433463	0.664678	0.817189
ENSMUSG00000014402	TSG101	2545.19	-0.00539555	0.0972843	-0.0554616	0.955771	0.981448
ENSMUSG00000014418	HPS5	1197.1	-0.252248	0.145782	-1.73032	0.0835738	0.220403
ENSMUSG00000014426	MAP3K4	1551.01	0.320066	0.11404	2.80662	0.00500636	0.0285888
ENSMUSG00000014444	PIEZO1	2397.35	0.0219326	0.164947	0.132967	0.894219	0.95112
ENSMUSG00000014453	BLK	1805.11	0.761163	0.278135	2.73667	0.00620651	0.0337716
ENSMUSG00000014470	RNF166	3819.25	0.0909157	0.207483	0.438184	0.661253	0.815667
ENSMUSG00000014496	ANKRD28	3344.81	0.977839	0.190539	5.13197	2.86733e-07	9.16692e-06
ENSMUSG00000014498	ANKRD52	4611.48	-0.219208	0.163744	-1.33872	0.180661	0.37281
ENSMUSG00000014503	PKD2L2	13.7381	-0.133913	0.409482	-0.32703	0.743645	0.866226
ENSMUSG00000014504	SRP19	1256.02	0.038716	0.170883	0.226564	0.820763	0.913316
ENSMUSG00000014529	TMBIM7	2.61957	0.0996664	0.664759	0.149929	0.880821	0.944934
ENSMUSG00000014542	CLEC4F	1.24721	-1.69987	0.613123	-2.77249	0.005563	NA
ENSMUSG00000014543	KLRA17	0.096141	0	0.301474	0	1	NA
ENSMUSG00000014547	WDFY2	263.448	1.06306	0.22034	4.82462	1.40268e-06	3.61168e-05
ENSMUSG00000014550	RBSN	1211.1	-0.0230695	0.0943798	-0.244433	0.806895	0.905382
ENSMUSG00000014551	MRPS25	927.936	-0.444839	0.125942	-3.5321	0.00041228	0.00401314
ENSMUSG00000014554	DGUOK	1235.54	-0.733604	0.131654	-5.57223	2.51504e-08	1.07609e-06
ENSMUSG00000014592	CAMTA1	306.886	0.134517	0.1442	0.932847	0.350899	0.568097
ENSMUSG00000014599	CSF1	10.3996	0.821011	0.644592	1.27369	0.202773	0.401808
ENSMUSG00000014601	STRIP1	2140.17	0.0964789	0.156406	0.616849	0.537334	0.730254
ENSMUSG00000014602	KIF1A	3.20957	-0.778177	0.615516	-1.26427	0.206134	0.405618
ENSMUSG00000014603	ALX3	0.142536	-0.10307	0.301474	-0.341889	0.732434	NA
ENSMUSG00000014606	SLC25A11	2952.86	-0.263923	0.149001	-1.77129	0.0765132	0.207477
ENSMUSG00000014609	CHRNE	2.71361	1.12068	0.639941	1.75122	0.0799082	0.213918
ENSMUSG00000014633	CMC2	689.47	-0.209608	0.205276	-1.0211	0.307205	0.523368
ENSMUSG00000014668	CHFR	2983.88	-0.110892	0.114691	-0.966875	0.333607	0.549743
ENSMUSG00000014686	CEACAM16	8.20158	-0.0317677	0.662754	-0.0479329	0.96177	0.984341
ENSMUSG00000014704	HOXA2	0.841362	-0.115357	0.619388	-0.186244	0.852253	NA
ENSMUSG00000014725	ADAM28	0.208787	-0.0620717	0.301474	-0.205894	0.836873	NA
ENSMUSG00000014747	ANKRD53	0.0563155	0.0343122	0.301474	0.113815	0.909384	NA
ENSMUSG00000014748	TEX261	3469.85	-0.33161	0.0909844	-3.64469	0.000267711	0.00285985
ENSMUSG00000014763	FAM120B	1499.76	-0.244085	0.092719	-2.63252	0.00847541	0.0425021
ENSMUSG00000014767	TBP	1358.6	0.0139543	0.106533	0.130986	0.895786	0.951537
ENSMUSG00000014769	PSMB1	6285.99	-0.185993	0.129468	-1.4366	0.150833	0.329812
ENSMUSG00000014771	PDCD2	1342.34	0.192347	0.111647	1.72281	0.0849232	0.22291
ENSMUSG00000014773	DLL1	3.14548	0.602391	0.646764	0.931393	0.35165	0.568832
ENSMUSG00000014776	NOL3	19.6438	-1.25322	0.4247	-2.95084	0.00316908	0.0200192
ENSMUSG00000014778	FHOD1	820.836	-0.0800624	0.184946	-0.432897	0.665089	0.817577
ENSMUSG00000014782	PLEKHG4	17.6223	-2.00345	0.494822	-4.04882	5.14768e-05	0.000744034
ENSMUSG00000014786	SLC9A5	128.732	0.775599	0.241105	3.21685	0.00129607	0.0100573
ENSMUSG00000014791	ELMO3	92.9844	-1.33992	0.291901	-4.59031	4.42581e-06	9.70968e-05
ENSMUSG00000014813	STC1	115.307	0.799528	0.521095	1.53432	0.12495	0.291505
ENSMUSG00000014837	4931428F04RIK	724.897	0.411819	0.12471	3.3022	0.000959292	0.00803302
ENSMUSG00000014846	TPPP3	3.59113	-1.42312	0.607751	-2.34162	0.0192004	0.0779434
ENSMUSG00000014850	MSH3	1253.64	0.0906312	0.19787	0.458033	0.646929	0.80629
ENSMUSG00000014852	ADAMTS13	1.72015	0.387862	0.308326	1.25796	NA	NA
ENSMUSG00000014856	TMEM208	971.916	-0.1491	0.176562	-0.844464	0.39841	0.613158
ENSMUSG00000014859	E2F4	5010.41	-0.744557	0.162262	-4.5886	4.46231e-06	9.76485e-05
ENSMUSG00000014867	SURF4	8902.84	-0.10062	0.110986	-0.906602	0.364618	0.582413
ENSMUSG00000014873	SURF2	1121.99	-0.537387	0.129643	-4.14512	3.3964e-05	0.00052346
ENSMUSG00000014905	DNAJB9	870.165	0.538775	0.19824	2.71779	0.00657197	0.0352472
ENSMUSG00000014907	NAF1	1221.35	0.270458	0.211452	1.27905	0.200878	0.399434
ENSMUSG00000014932	YES1	3.41577	1.02899	0.669475	1.53702	0.12429	0.290696
ENSMUSG00000014956	PPP1CB	6368.53	0.679872	0.234376	2.90078	0.0037224	0.0227443
ENSMUSG00000014959	GORASP2	4294.04	-0.0160686	0.115714	-0.138864	0.889557	0.949339
ENSMUSG00000014980	TSEN15	350.525	-0.620504	0.136973	-4.53013	5.89476e-06	0.000122897
ENSMUSG00000015001	OC90	0	NA	NA	NA	NA	NA
ENSMUSG00000015002	EFR3A	3639.88	0.274729	0.192323	1.42848	0.153154	0.333576
ENSMUSG00000015013	TRAPPC2L	599.685	-0.364186	0.188525	-1.93177	0.053388	0.16191
ENSMUSG00000015016	ACSF3	520.397	-1.28	0.166062	-7.70794	1.27863e-14	2.52788e-12
ENSMUSG00000015023	DDX19A	5676.49	0.0297492	0.1375	0.216357	0.828709	0.918592
ENSMUSG00000015027	GALNS	988.947	-0.776655	0.183637	-4.2293	2.34422e-05	0.00038882
ENSMUSG00000015053	GATA2	3.79055	0.688116	0.653105	1.05361	0.292062	0.506551
ENSMUSG00000015083	C8G	63.6589	0.104487	0.263271	0.396879	0.691457	0.834542
ENSMUSG00000015085	ENTPD2	0.544191	0	0.49439	0	1	NA
ENSMUSG00000015087	RABL6	2562.53	-0.258425	0.127036	-2.03427	0.0419247	0.13691
ENSMUSG00000015090	PTGDS	2.27652	0.329461	0.670417	0.491427	0.623124	0.789811
ENSMUSG00000015092	EDF1	3586.31	-0.455957	0.173245	-2.63186	0.00849184	0.0425447
ENSMUSG00000015093	CLIC3	2.39541	-0.365819	0.664798	-0.550271	0.582134	0.763105
ENSMUSG00000015094	NPDC1	8.78389	-0.627511	0.574716	-1.09186	0.274894	0.486638
ENSMUSG00000015095	FBXW5	1824.25	-0.496419	0.145788	-3.40507	0.000661474	0.00588281
ENSMUSG00000015112	SLC25A13	561.821	-0.193621	0.149753	-1.29293	0.196034	0.393533
ENSMUSG00000015120	UBE2I	8362.93	-0.195812	0.0558757	-3.50442	0.00045761	0.00436302
ENSMUSG00000015126	TSR3	952.387	-0.204128	0.154397	-1.3221	0.186135	0.380296
ENSMUSG00000015127	UNKL	2096.58	-0.148351	0.15875	-0.934492	0.35005	0.567043
ENSMUSG00000015133	LRRK1	34.4651	-0.342229	0.478098	-0.715813	0.474107	0.679157
ENSMUSG00000015134	ALDH1A3	3.38408	0.295654	0.586054	0.504482	0.613923	0.783053
ENSMUSG00000015143	ACTN1	10901.3	-0.936698	0.151369	-6.18816	6.08688e-10	4.22155e-08
ENSMUSG00000015149	SIRT2	2748.66	-0.0679622	0.183541	-0.370284	0.711171	0.846867
ENSMUSG00000015165	HNRNPL	17087.8	-0.150972	0.0943078	-1.60084	0.109412	0.266828
ENSMUSG00000015176	NOLC1	6737.08	-0.113558	0.213989	-0.530673	0.595645	0.77144
ENSMUSG00000015189	CASD1	1208.11	0.218821	0.197959	1.10538	0.268993	0.479697
ENSMUSG00000015202	CNKSR3	593.195	0.555655	0.243578	2.28122	0.0225357	0.0880741
ENSMUSG00000015214	MTMR1	1823.06	0.101928	0.17433	0.584683	0.558761	0.746132
ENSMUSG00000015217	HMGB3	2278.23	0.747292	0.232239	3.21777	0.00129192	0.0100411
ENSMUSG00000015222	MAP2	23.7644	0.273665	0.627927	0.435822	0.662966	0.816191
ENSMUSG00000015224	CYP2J9	138.148	-0.819095	0.271126	-3.02109	0.00251865	0.0168031
ENSMUSG00000015242	NIPSNAP3A	0	NA	NA	NA	NA	NA
ENSMUSG00000015243	ABCA1	609.989	1.69359	0.439537	3.85312	0.000116622	0.00144518
ENSMUSG00000015247	NIPSNAP3B	931.432	0.200961	0.132369	1.51819	0.128968	0.297591
ENSMUSG00000015289	LAGE3	1043.34	-0.319241	0.159222	-2.005	0.0449629	0.143778
ENSMUSG00000015290	UBL4A	1662.31	-0.260918	0.131884	-1.97839	0.0478851	0.149804
ENSMUSG00000015291	GDI1	2593.8	-0.237759	0.177158	-1.34208	0.179572	0.371364
ENSMUSG00000015305	SASH1	63.7489	-0.225752	0.337485	-0.668925	0.503544	0.703215
ENSMUSG00000015312	GADD45B	231.471	1.211	0.282797	4.28224	1.85022e-05	0.000318238
ENSMUSG00000015314	SLAMF6	4748.72	-0.578388	0.243572	-2.3746	0.0175678	0.0732701
ENSMUSG00000015316	SLAMF1	284.755	-0.0149775	0.344086	-0.0435283	0.96528	0.986267
ENSMUSG00000015335	ZDHHC12	331.67	-0.430331	0.187799	-2.29145	0.0219375	0.0862612
ENSMUSG00000015337	ENDOG	210.322	0.131528	0.241609	0.544382	0.586179	0.765662
ENSMUSG00000015340	CYBB	33.2054	1.07149	0.386091	2.77523	0.00551626	0.0307951
ENSMUSG00000015341	GOLGA7	3133.3	0.0175638	0.100177	0.175327	0.860822	0.935858
ENSMUSG00000015342	XK	382.906	0.81157	0.271164	2.99291	0.00276329	0.0180032
ENSMUSG00000015354	PCOLCE2	0.138236	0	0.301474	0	1	NA
ENSMUSG00000015355	CD48	4310.48	0.250986	0.206918	1.21297	0.22514	0.428315
ENSMUSG00000015357	CLPX	1474.84	-0.160679	0.132394	-1.21364	0.224884	0.428066
ENSMUSG00000015363	TRABD	2460.67	-0.303095	0.147811	-2.05057	0.0403092	0.133279
ENSMUSG00000015365	MOV10L1	0	NA	NA	NA	NA	NA
ENSMUSG00000015377	DENND6B	281.497	0.153198	0.236028	0.649067	0.516295	0.713036
ENSMUSG00000015396	CD83	51.6602	0.846965	0.351585	2.40899	0.0159966	0.0682066
ENSMUSG00000015401	TMEM27	0.115188	-0.0577068	0.301474	-0.191416	0.8482	NA
ENSMUSG00000015405	ACE2	0.0307238	0.0343122	0.301474	0.113815	0.909384	NA
ENSMUSG00000015437	GZMB	187.485	0.969335	0.668333	1.45038	0.146953	0.323677
ENSMUSG00000015441	GZMF	0	NA	NA	NA	NA	NA
ENSMUSG00000015443	GZMN	0	NA	NA	NA	NA	NA
ENSMUSG00000015451	C4A	11.9955	-0.693761	0.478567	-1.44966	0.147153	0.323909
ENSMUSG00000015452	AGER	58.9613	0.486665	0.297178	1.63762	0.101502	0.253018
ENSMUSG00000015461	ATF6B	3100.13	-0.284304	0.163537	-1.73847	0.0821274	0.217597
ENSMUSG00000015467	EGFL8	42.0377	-0.863805	0.29005	-2.97812	0.00290023	0.0187111
ENSMUSG00000015468	NOTCH4	25.6608	0.838761	0.333697	2.51355	0.0119524	0.055225
ENSMUSG00000015474	PPT2	2394.43	-0.601424	0.179148	-3.35714	0.000787546	0.00681905
ENSMUSG00000015476	PRRT1	1726.17	-1.12156	0.245476	-4.56893	4.90215e-06	0.000105133
ENSMUSG00000015478	RNF5	1292.93	-0.296381	0.101798	-2.91145	0.00359752	0.0221307
ENSMUSG00000015484	FAM163A	0	NA	NA	NA	NA	NA
ENSMUSG00000015488	CACFD1	1407.49	-0.368065	0.118019	-3.11868	0.00181663	0.0131618
ENSMUSG00000015501	HIVEP2	5278.75	0.0794559	0.174228	0.456045	0.648357	0.807186
ENSMUSG00000015519	2310057J18RIK	0	NA	NA	NA	NA	NA
ENSMUSG00000015522	ARNT	2019.66	-0.152885	0.118547	-1.28966	0.197168	0.394882
ENSMUSG00000015533	ITGA2	121.159	0.303484	0.572117	0.530457	0.595795	0.771488
ENSMUSG00000015536	MOCS2	780.521	-0.0123193	0.185663	-0.0663534	0.947096	0.976681
ENSMUSG00000015542	NAT9	276.907	-0.300891	0.173285	-1.7364	0.0824939	0.218157
ENSMUSG00000015568	LPL	15.0083	0.0545832	0.417637	0.130695	0.896016	0.95162
ENSMUSG00000015575	ATP6V0E	2622.97	0.161728	0.159057	1.0168	0.309251	0.525241
ENSMUSG00000015579	NKX2-5	0.343196	0	0.30157	0	1	NA
ENSMUSG00000015597	ZFP318	991.93	0.861414	0.244842	3.51825	0.000434403	0.00419525
ENSMUSG00000015599	TTBK1	2.812	0.535996	0.667464	0.803033	0.421955	0.634153
ENSMUSG00000015605	SRF	3057.22	-0.363268	0.17357	-2.09292	0.0363562	0.124344
ENSMUSG00000015619	GATA3	6978.11	0.378219	0.146708	2.57804	0.00993635	0.0479263
ENSMUSG00000015627	GATA5	0	NA	NA	NA	NA	NA
ENSMUSG00000015647	LAMA5	17.4617	1.12507	0.555187	2.02647	0.0427165	0.138837
ENSMUSG00000015652	STEAP1	0	NA	NA	NA	NA	NA
ENSMUSG00000015653	STEAP2	0.0269766	0	0.301474	0	1	NA
ENSMUSG00000015656	HSPA8	92504.7	-0.0847914	0.205618	-0.412373	0.680066	0.827472
ENSMUSG00000015659	SERAC1	142.61	-0.394446	0.230971	-1.70777	0.0876791	0.227703
ENSMUSG00000015665	AWAT1	0.0309578	0	0.301474	0	1	NA
ENSMUSG00000015668	PDZD11	862.351	-0.521764	0.155132	-3.36334	0.000770042	0.00669941
ENSMUSG00000015671	PSMA2	6057.08	-0.025742	0.146681	-0.175496	0.86069	0.935858
ENSMUSG00000015672	MRPL32	1088.1	0.0891616	0.12704	0.701836	0.482781	0.686892
ENSMUSG00000015697	SETDB1	3679	0.100458	0.0955768	1.05107	0.293225	0.507667
ENSMUSG00000015702	ANXA9	69.556	-0.885468	0.221379	-3.99978	6.34011e-05	0.000882995
ENSMUSG00000015709	ARNT2	67.1094	-0.699999	0.42958	-1.6295	0.103208	0.256048
ENSMUSG00000015711	PRUNE1	1167.76	0.331786	0.14791	2.24315	0.024887	0.0947237
ENSMUSG00000015714	CERS2	4227.3	0.0591478	0.0814428	0.72625	0.467686	0.673775
ENSMUSG00000015721	NLRP5	0	NA	NA	NA	NA	NA
ENSMUSG00000015733	CAPZA2	6080.97	0.718649	0.21996	3.26719	0.00108622	0.00883772
ENSMUSG00000015745	PLEKHO1	1916.57	-0.353585	0.244201	-1.44793	0.147637	0.324685
ENSMUSG00000015747	VPS45	1011.91	-0.162793	0.121478	-1.3401	0.180213	0.372243
ENSMUSG00000015748	PRPF3	1784.31	-0.0990345	0.134594	-0.735802	0.461851	0.66873
ENSMUSG00000015749	ANP32E	17391.3	0.556644	0.238641	2.33256	0.0196714	0.0793326
ENSMUSG00000015750	APH1A	3005.22	-0.216609	0.147919	-1.46438	0.143091	0.318145
ENSMUSG00000015755	TAB2	4987.52	0.110993	0.147646	0.751751	0.452201	0.660372
ENSMUSG00000015757	PPIL4	1712.08	0.310571	0.212717	1.46002	0.144285	0.319972
ENSMUSG00000015759	CNIH1	2118.11	0.0468764	0.115006	0.407601	0.683567	0.829501
ENSMUSG00000015766	EPS8	25.9814	1.45518	0.533191	2.72918	0.00634919	0.0343112
ENSMUSG00000015776	MED22	2985.54	-0.226636	0.13444	-1.68577	0.0918394	0.235253
ENSMUSG00000015787	ABO	0.0553283	0.0343122	0.301474	0.113815	0.909384	NA
ENSMUSG00000015790	SURF1	1352.11	-0.316216	0.154931	-2.04101	0.0412494	0.135373
ENSMUSG00000015804	MED28	1854.73	-0.170254	0.143181	-1.18908	0.234406	0.439049
ENSMUSG00000015806	QDPR	2170.68	0.0436805	0.148956	0.293244	0.769336	0.881436
ENSMUSG00000015812	GNRH1	4.84238	-0.507051	0.56207	-0.902113	0.366997	0.584964
ENSMUSG00000015829	TNR	33.9635	-1.21844	0.644465	-1.89062	0.0586756	0.172752
ENSMUSG00000015837	SQSTM1	7851.17	-0.458072	0.176555	-2.5945	0.00947278	0.0461956
ENSMUSG00000015839	NFE2L2	1936.29	0.638362	0.165758	3.85117	0.000117553	0.00145461
ENSMUSG00000015843	RXRG	23.0587	0.444908	0.588295	0.756268	0.449489	0.657863
ENSMUSG00000015846	RXRA	585.452	-0.516908	0.379153	-1.36332	0.172781	0.361669
ENSMUSG00000015850	ADAMTSL4	6.90159	-1.42362	0.635343	-2.24071	0.0250448	0.095114
ENSMUSG00000015852	FCRLS	0.58378	0.209303	0.411092	0.50914	0.610654	NA
ENSMUSG00000015854	CD5L	6.73028	0.47176	0.610139	0.773202	0.439403	0.6489
ENSMUSG00000015869	PRPSAP1	2191.94	0.0941725	0.121447	0.775419	0.438092	0.64785
ENSMUSG00000015879	FAM184B	20.8861	0.489966	0.598674	0.81842	0.413118	0.626267
ENSMUSG00000015880	NCAPG	1351.02	0.737082	0.404649	1.82154	0.0685255	0.192659
ENSMUSG00000015882	LCORL	612.069	1.21248	0.353489	3.43003	0.000603508	0.00547486
ENSMUSG00000015889	LTA4H	11304.6	-0.471617	0.137641	-3.42643	0.000611577	0.00552185
ENSMUSG00000015890	AMDHD1	2.96118	-0.779927	0.672117	-1.1604	0.245884	0.452376
ENSMUSG00000015932	DSTN	910.11	-0.0645573	0.238156	-0.271072	0.786336	0.893025
ENSMUSG00000015937	H2AFY	19779.7	0.245592	0.103492	2.37304	0.0176423	0.0734208
ENSMUSG00000015942	GTF2IRD2	546.377	-0.353896	0.159535	-2.2183	0.0265345	0.0991744
ENSMUSG00000015943	BOLA1	504.356	-0.0911965	0.21046	-0.433319	0.664783	0.817259
ENSMUSG00000015944	GATSL2	1364.57	0.168213	0.210508	0.799082	0.424243	0.636219
ENSMUSG00000015947	FCGR1	7.20907	0.00345639	0.561461	0.00615608	0.995088	0.999508
ENSMUSG00000015950	NCF1	246.579	-0.596962	0.460576	-1.29612	0.194934	0.392239
ENSMUSG00000015957	WNT11	0.253631	0	0.301474	0	1	NA
ENSMUSG00000015961	ADSS	5304.67	0.546138	0.144871	3.76982	0.000163363	0.00189854
ENSMUSG00000015962	1700016C15RIK	0	NA	NA	NA	NA	NA
ENSMUSG00000015966	IL17RB	3114.92	0.110444	0.209511	0.52715	0.59809	0.773286
ENSMUSG00000015968	CACNA1D	18.9215	0.429412	0.371354	1.15634	0.247542	0.454423
ENSMUSG00000015970	CHDH	6986.05	0.177991	0.150189	1.18511	0.235974	0.440853
ENSMUSG00000015971	ACTR8	1328.63	-0.291366	0.0929029	-3.13624	0.00171127	0.0125947
ENSMUSG00000015980	LRRC27	56.0564	0.372811	0.353199	1.05553	0.291184	0.506101
ENSMUSG00000015981	STK32C	13.5648	0.514827	0.539161	0.954868	0.339644	0.555756
ENSMUSG00000015994	FNTA	2452.19	0.215883	0.108067	1.99766	0.045753	0.145194
ENSMUSG00000016018	SKIV2L2	3826.89	0.283369	0.184546	1.53549	0.124664	0.291257
ENSMUSG00000016024	LBP	37.2704	0.68352	0.505062	1.35334	0.175947	0.366202
ENSMUSG00000016028	CELSR1	6627.88	0.0847609	0.226219	0.374685	0.707895	0.845371
ENSMUSG00000016087	FLI1	3663.69	0.474037	0.146454	3.23676	0.00120895	0.00957991
ENSMUSG00000016128	STARD13	5.58466	0.804947	0.626893	1.28403	0.199133	0.397065
ENSMUSG00000016150	TENM1	547.308	-2.04446	0.610334	-3.34974	0.000808883	0.00697033
ENSMUSG00000016179	CAMK1G	19.998	-4.05825	0.632853	-6.41262	1.43038e-10	1.13901e-08
ENSMUSG00000016181	DIEXF	2578.51	0.136022	0.160064	0.849801	0.395436	0.610591
ENSMUSG00000016194	HSD11B1	986.563	-1.02871	0.252177	-4.07933	4.51661e-05	0.000662282
ENSMUSG00000016200	SYT14	83.5503	-0.660834	0.524482	-1.25997	0.207678	0.407631
ENSMUSG00000016206	H2-M3	751.11	0.197525	0.235778	0.837759	0.402166	0.61663
ENSMUSG00000016239	LONRF3	20.5997	2.02097	0.462604	4.36868	1.25003e-05	0.00022946
ENSMUSG00000016252	ATP5E	3380.4	-0.513397	0.206213	-2.48964	0.0127871	0.0578481
ENSMUSG00000016253	NELFCD	2141.76	-0.195112	0.108633	-1.79607	0.0724833	0.200243
ENSMUSG00000016255	TUBB1	0.155053	0	0.301474	0	1	NA
ENSMUSG00000016256	CTSZ	1790.35	-0.577585	0.182352	-3.16742	0.00153798	0.0115921
ENSMUSG00000016257	PRELID3B	2034.64	0.0783543	0.153095	0.511802	0.60879	0.780383
ENSMUSG00000016262	SERTAD4	10.3145	-0.283193	0.657781	-0.430528	0.666812	0.818466
ENSMUSG00000016283	H2-M2	13.0833	0.79317	0.509287	1.55741	0.119372	0.282919
ENSMUSG00000016308	UBE2A	1704.81	0.518852	0.131843	3.93537	8.30673e-05	0.00109651
ENSMUSG00000016319	SLC25A5	19825.4	0.0771516	0.137261	0.56208	0.574061	0.757288
ENSMUSG00000016327	ATP1B4	0	NA	NA	NA	NA	NA
ENSMUSG00000016344	PPDPF	2161.56	-0.471265	0.198335	-2.37611	0.0174964	0.0731383
ENSMUSG00000016346	KCNQ2	0.358886	0.124974	0.332565	0.375787	0.707075	NA
ENSMUSG00000016349	EEF1A2	0	NA	NA	NA	NA	NA
ENSMUSG00000016356	COL20A1	38.6416	-0.360707	0.305039	-1.1825	0.237009	0.442095
ENSMUSG00000016382	PLS3	64.9302	-0.043542	0.366716	-0.118735	0.905485	0.956199
ENSMUSG00000016386	MPPED2	16.6501	1.19569	0.535877	2.23127	0.0256634	0.0966522
ENSMUSG00000016409	NKAP	1038.81	0.195305	0.187081	1.04396	0.296504	0.511265
ENSMUSG00000016427	NDUFA1	1372.85	-0.0252247	0.174008	-0.144963	0.88474	0.947189
ENSMUSG00000016458	WT1	0.712718	0.0374384	0.329764	0.113531	0.90961	NA
ENSMUSG00000016477	E2F3	1298.62	0.270343	0.181916	1.48609	0.137255	0.309855
ENSMUSG00000016481	CR1L	2664.57	0.0383661	0.0798074	0.480734	0.630706	0.795785
ENSMUSG00000016487	PPFIBP1	171.691	-0.760731	0.306674	-2.48059	0.0131165	0.0589815
ENSMUSG00000016493	CD46	67.4873	0.509702	0.44269	1.15138	0.249578	0.456771
ENSMUSG00000016494	CD34	15.6824	0.389657	0.516484	0.754442	0.450584	0.65895
ENSMUSG00000016495	PLGRKT	1463.08	-0.856431	0.158729	-5.39556	6.83107e-08	2.59943e-06
ENSMUSG00000016496	CD274	697.986	0.223364	0.236644	0.943883	0.34523	0.561614
ENSMUSG00000016498	PDCD1LG2	165.328	2.65686	0.446673	5.94812	2.71238e-09	1.5603e-07
ENSMUSG00000016503	GTF3A	2713.57	-0.406877	0.137413	-2.96098	0.00306659	0.0195209
ENSMUSG00000016510	MTIF3	782.976	-0.514519	0.158227	-3.25178	0.00114685	0.0092051
ENSMUSG00000016520	LNX2	1395.35	-0.398853	0.147048	-2.71239	0.00667997	0.0356265
ENSMUSG00000016524	IL19	0.837846	0.603398	0.588756	1.02487	0.305425	NA
ENSMUSG00000016526	DYRK3	212.72	1.28521	0.280746	4.57785	4.6978e-06	0.000101766
ENSMUSG00000016528	MAPKAPK2	6041.56	0.757345	0.185304	4.08703	4.36928e-05	0.000645801
ENSMUSG00000016529	IL10	5.02458	-2.4753	0.630018	-3.92894	8.53229e-05	0.00112113
ENSMUSG00000016534	LAMP2	3212.02	0.349853	0.175678	1.99145	0.0464319	0.146607
ENSMUSG00000016541	ATXN10	5327.1	-0.179265	0.128501	-1.39505	0.163001	0.348231
ENSMUSG00000016552	FOXRED2	1214.2	-0.0751623	0.191491	-0.39251	0.694681	0.836945
ENSMUSG00000016554	EIF3D	10258	-0.112746	0.157688	-0.714993	0.474613	0.679429
ENSMUSG00000016559	H3F3B	22858.4	0.253559	0.103299	2.45461	0.0141037	0.0623126
ENSMUSG00000016619	NUP50	4827.89	0.212056	0.103544	2.04798	0.0405623	0.133782
ENSMUSG00000016624	PHF21B	14.472	-0.0288409	0.43873	-0.0657372	0.947587	0.976897
ENSMUSG00000016626	NLRP14	0	NA	NA	NA	NA	NA
ENSMUSG00000016637	IFT27	716.856	-0.50596	0.203409	-2.4874	0.0128681	0.058104
ENSMUSG00000016664	PACSIN2	617.947	-0.314127	0.294024	-1.06837	0.285353	0.499041
ENSMUSG00000016756	CMAH	5193.83	0.135208	0.372611	0.362868	0.716703	0.850415
ENSMUSG00000016757	TTLL12	4435.1	-0.531997	0.159163	-3.34247	0.000830366	0.00710562
ENSMUSG00000016758	BIK	4.71169	-0.962418	0.606508	-1.58682	0.112554	0.272495
ENSMUSG00000016763	SCUBE1	5.98334	-0.392397	0.624028	-0.628813	0.529472	0.723747
ENSMUSG00000016831	TOX4	6220.63	-0.0865432	0.0954176	-0.906994	0.36441	0.582136
ENSMUSG00000016833	MRPS18C	1083.84	0.133978	0.198669	0.674379	0.500071	0.70093
ENSMUSG00000016918	SULF1	2.7338	-1.66778	0.644351	-2.58832	0.00964462	0.0468344
ENSMUSG00000016921	SRSF6	9988.36	-0.225739	0.11926	-1.89284	0.0583795	0.17213
ENSMUSG00000016933	PLCG1	11859.8	-0.0856633	0.172922	-0.495388	0.620326	0.787628
ENSMUSG00000016940	KCTD2	1247.7	-0.357328	0.138558	-2.57891	0.00991133	0.0478459
ENSMUSG00000016942	TMPRSS6	0.150825	-0.0587313	0.301474	-0.194814	0.845539	NA
ENSMUSG00000016946	KCTD5	1145.88	-0.082684	0.0838836	-0.985699	0.324281	0.539769
ENSMUSG00000016982	POM121L2	0.0422322	-0.0537205	0.301474	-0.178193	0.858571	NA
ENSMUSG00000016984	ETAA1	789.377	0.754527	0.271705	2.77701	0.00548617	0.0306669
ENSMUSG00000016995	MATN4	0	NA	NA	NA	NA	NA
ENSMUSG00000016998	SVS4	0	NA	NA	NA	NA	NA
ENSMUSG00000017000	SVS6	0	NA	NA	NA	NA	NA
ENSMUSG00000017002	SLPI	5.56214	-0.0988514	0.668715	-0.147823	0.882482	0.945702
ENSMUSG00000017003	SVS3A	0	NA	NA	NA	NA	NA
ENSMUSG00000017004	SVS5	0	NA	NA	NA	NA	NA
ENSMUSG00000017007	RBPJL	0	NA	NA	NA	NA	NA
ENSMUSG00000017009	SDC4	90.9192	3.73672	0.461655	8.09418	5.7651e-16	1.4371e-13
ENSMUSG00000017049	CCDC70	0	NA	NA	NA	NA	NA
ENSMUSG00000017057	IL13RA1	6.24659	-0.778738	0.496685	-1.56787	0.116911	0.278978
ENSMUSG00000017064	PRL5A1	0	NA	NA	NA	NA	NA
ENSMUSG00000017119	NBR1	3310.23	-0.149945	0.128857	-1.16365	0.244565	0.451095
ENSMUSG00000017132	CYTH1	5075.94	-0.0514287	0.188819	-0.272371	0.785337	0.892252
ENSMUSG00000017144	RND3	8.1959	1.11296	0.538547	2.06659	0.0387728	0.130125
ENSMUSG00000017146	BRCA1	1024.5	0.462511	0.357891	1.29232	0.196245	0.393864
ENSMUSG00000017165	GAST	0	NA	NA	NA	NA	NA
ENSMUSG00000017167	CNTNAP1	943.478	1.90631	0.523516	3.64137	0.000271191	0.00288643
ENSMUSG00000017176	NT5C3B	2868.99	-0.167081	0.185665	-0.899906	0.36817	0.58578
ENSMUSG00000017188	COA3	1235.03	-0.432312	0.144917	-2.98317	0.00285284	0.0184608
ENSMUSG00000017195	ZPBP2	26.4396	-0.639766	0.45805	-1.39672	0.162499	0.347592
ENSMUSG00000017204	GSDMA	0.0921922	0	0.301474	0	1	NA
ENSMUSG00000017210	MED24	5715.19	0.131692	0.137961	0.954557	0.339802	0.555887
ENSMUSG00000017211	GSDMA2	0	NA	NA	NA	NA	NA
ENSMUSG00000017221	PSMD3	7704.97	-0.18156	0.139528	-1.30124	0.193177	0.389662
ENSMUSG00000017264	EXOSC10	5013.95	-0.259405	0.12993	-1.9965	0.0458794	0.145461
ENSMUSG00000017286	GLOD4	3811.15	0.0713578	0.123867	0.576082	0.56456	0.750162
ENSMUSG00000017288	VPS53	2055.42	-0.41921	0.109406	-3.8317	0.000127259	0.00155019
ENSMUSG00000017291	TAOK1	2530.63	0.299154	0.287009	1.04232	0.297265	0.51237
ENSMUSG00000017299	DNTTIP1	1427.76	-0.139045	0.140695	-0.988273	0.323019	0.538568
ENSMUSG00000017300	TNNC2	0.365391	0.401846	0.39519	1.01684	0.309229	NA
ENSMUSG00000017307	ACOT8	515.517	-0.0929407	0.165605	-0.56122	0.574648	0.757738
ENSMUSG00000017309	CD300LG	0.237016	0	0.301474	0	1	NA
ENSMUSG00000017310	SPINT4	0	NA	NA	NA	NA	NA
ENSMUSG00000017311	PYY	0	NA	NA	NA	NA	NA
ENSMUSG00000017314	MPP2	17.4746	-0.822668	0.629156	-1.30757	0.191018	0.387031
ENSMUSG00000017316	PPY	0	NA	NA	NA	NA	NA
ENSMUSG00000017344	VTN	0.140835	0	0.301474	0	1	NA
ENSMUSG00000017376	NLK	1412.88	-0.0216475	0.19679	-0.110003	0.912407	0.959665
ENSMUSG00000017386	TRAF4	3237.18	-0.123179	0.181456	-0.678837	0.497241	0.698623
ENSMUSG00000017390	ALDOC	127.954	-2.03391	0.242627	-8.38287	5.16517e-17	1.6452e-14
ENSMUSG00000017400	STAC2	4.87229	1.17836	0.66129	1.78191	0.0747634	0.204473
ENSMUSG00000017404	RPL19	51370.2	-0.555066	0.174017	-3.18972	0.00142412	0.0108721
ENSMUSG00000017405	NEK8	487.876	0.0681634	0.183133	0.372207	0.709739	0.846201
ENSMUSG00000017412	CACNB4	1.1414	0.183467	0.613461	0.299069	0.764888	NA
ENSMUSG00000017417	PLXDC1	794.985	-2.13569	0.286694	-7.44935	9.38008e-14	1.50783e-11
ENSMUSG00000017418	ARL5B	1338.42	0.232271	0.240487	0.965835	0.334127	0.550319
ENSMUSG00000017421	ZFP207	7587.69	0.0862524	0.127231	0.677921	0.497822	0.69904
ENSMUSG00000017428	PSMD11	3977.81	0.143006	0.0738779	1.9357	0.0529039	0.160654
ENSMUSG00000017446	C1QTNF1	849.221	0.286877	0.562436	0.510062	0.610008	0.781246
ENSMUSG00000017453	PIPOX	107.533	-1.45449	0.382848	-3.79914	0.000145196	0.00172114
ENSMUSG00000017466	TIMP2	3250.74	-0.513025	0.219686	-2.33526	0.0195297	0.078945
ENSMUSG00000017478	ZC3H18	4895.7	0.0337082	0.112628	0.299288	0.76472	0.878962
ENSMUSG00000017485	TOP2B	10875.2	0.379646	0.231801	1.63781	0.101461	0.252991
ENSMUSG00000017491	RARB	0.443207	0.0287502	0.342661	0.0839026	NA	NA
ENSMUSG00000017493	IGFBP4	16975.4	0.0671474	0.560958	0.119701	0.90472	0.955772
ENSMUSG00000017499	CDC6	1884.5	0.227373	0.318926	0.712933	0.475887	0.680744
ENSMUSG00000017548	SUZ12	3736.94	0.553642	0.287309	1.92699	0.0539808	0.162963
ENSMUSG00000017550	ATAD5	1641.22	0.371834	0.316308	1.17554	0.239777	0.445295
ENSMUSG00000017561	CRLF3	3974.27	-0.101592	0.126608	-0.802412	0.422315	0.634395
ENSMUSG00000017588	KRT27	0	NA	NA	NA	NA	NA
ENSMUSG00000017607	TNS4	113.923	-0.108785	0.597105	-0.182187	0.855436	0.933243
ENSMUSG00000017615	TNFAIP1	895.909	0.883327	0.127444	6.9311	4.17592e-12	4.6945e-10
ENSMUSG00000017631	ABR	7967	-0.102874	0.131533	-0.782113	0.434148	0.644667
ENSMUSG00000017639	RAB11FIP4	2284.44	-1.2965	0.24291	-5.33736	9.43104e-08	3.45136e-06
ENSMUSG00000017652	CD40	2.51468	1.34461	0.649212	2.07115	0.0383449	0.129042
ENSMUSG00000017664	SLC35C2	1428.86	-0.00879492	0.203297	-0.0432615	0.965493	0.986426
ENSMUSG00000017667	ZFP334	0.246541	0.0267138	0.309348	0.0863551	0.931184	NA
ENSMUSG00000017670	ELMO2	1963.37	-0.0666674	0.128512	-0.518762	0.603926	0.777194
ENSMUSG00000017677	WSB1	1888.84	0.429285	0.170803	2.51334	0.0119595	0.055225
ENSMUSG00000017679	TTPAL	2644.3	-0.310319	0.120516	-2.57493	0.010026	0.0482432
ENSMUSG00000017686	RHOT1	1958.23	0.393544	0.144863	2.71666	0.00659436	0.0353453
ENSMUSG00000017688	HNF4G	0	NA	NA	NA	NA	NA
ENSMUSG00000017692	RHBDL3	141.445	2.13537	0.456331	4.67943	2.87678e-06	6.79679e-05
ENSMUSG00000017697	ADA	1587.69	0.57581	0.242589	2.3736	0.0176156	0.0733449
ENSMUSG00000017707	SERINC3	28970.1	1.02518	0.18001	5.69515	1.23263e-08	5.90566e-07
ENSMUSG00000017713	THA1	157.417	-0.465037	0.361933	-1.28487	0.198838	0.396764
ENSMUSG00000017715	PGS1	1509.44	-0.537504	0.118248	-4.54556	5.47904e-06	0.00011549
ENSMUSG00000017716	BIRC5	1566.74	0.22809	0.33456	0.681761	0.49539	0.697283
ENSMUSG00000017718	AFMID	419.155	-0.501219	0.235268	-2.13041	0.0331375	0.116391
ENSMUSG00000017720	TRP53TG5	0	NA	NA	NA	NA	NA
ENSMUSG00000017721	PIGT	5325.72	0.140743	0.186194	0.755895	0.449712	0.658078
ENSMUSG00000017723	WFDC2	4.29549	-0.00887618	0.310013	-0.0286316	NA	NA
ENSMUSG00000017724	ETV4	74.6474	0.0492258	0.609672	0.0807414	0.935648	0.971379
ENSMUSG00000017733	EPPIN	0	NA	NA	NA	NA	NA
ENSMUSG00000017734	DBNDD2	19.6302	0.507034	0.635389	0.797991	0.424876	0.636796
ENSMUSG00000017737	MMP9	198.987	-0.458949	0.650235	-0.70582	0.4803	0.684494
ENSMUSG00000017740	SLC12A5	2.07506	-0.0191748	0.664429	-0.028859	0.976977	NA
ENSMUSG00000017747	GHDC	158.234	-0.724155	0.27452	-2.63789	0.00834232	0.0420786
ENSMUSG00000017754	PLTP	93.4972	-0.225979	0.494793	-0.456715	0.647876	0.806913
ENSMUSG00000017756	SLC12A7	3715.96	-0.705031	0.184806	-3.81498	0.000136196	0.0016393
ENSMUSG00000017760	CTSA	7172.79	-0.347152	0.195936	-1.77177	0.0764336	0.207465
ENSMUSG00000017764	ZSWIM1	539.382	-0.0475773	0.179538	-0.264998	0.791011	0.896153
ENSMUSG00000017765	SLC12A4	950.086	0.0850996	0.158034	0.538488	0.59024	0.768293
ENSMUSG00000017767	SPATA25	0.440152	0.104302	0.392172	0.26596	0.79027	NA
ENSMUSG00000017774	MYO1C	1077.89	-0.165703	0.270344	-0.612935	0.539919	0.732301
ENSMUSG00000017776	CRK	2339.91	0.596867	0.16793	3.55426	0.000379049	0.00375556
ENSMUSG00000017778	COX7C	1829.51	-0.272902	0.19853	-1.37461	0.169253	0.356652
ENSMUSG00000017781	PITPNA	8641.32	-0.0528155	0.0948802	-0.556655	0.577763	0.759924
ENSMUSG00000017801	MLX	1821.72	-0.350256	0.129274	-2.70941	0.00674039	0.0358426
ENSMUSG00000017802	FAM134C	4351.41	-0.152263	0.168489	-0.903696	0.366156	0.584328
ENSMUSG00000017817	JPH2	68.2647	-1.40705	0.4592	-3.06413	0.00218302	0.0151098
ENSMUSG00000017830	DHX58	1038.18	0.0135416	0.401269	0.033747	0.973079	0.989533
ENSMUSG00000017831	RAB5A	1360.37	0.666823	0.187281	3.56054	0.000370088	0.00368161
ENSMUSG00000017832	HSPB9	7.15977	-0.218604	0.53943	-0.405249	0.685294	0.830543
ENSMUSG00000017837	NKIRAS2	993.102	-0.538629	0.140054	-3.84587	0.000120124	0.00147686
ENSMUSG00000017843	PPP2R5C	6723.94	-0.0795494	0.105086	-0.756994	0.449053	0.65748
ENSMUSG00000017858	IFT52	1844.41	-0.57912	0.0935824	-6.18834	6.08009e-10	4.22155e-08
ENSMUSG00000017861	MYBL2	1730.01	0.0574164	0.314178	0.182751	0.854993	0.932937
ENSMUSG00000017868	SGK2	0	NA	NA	NA	NA	NA
ENSMUSG00000017897	EYA2	751.879	-1.18076	0.303399	-3.89177	9.95158e-05	0.00126791
ENSMUSG00000017922	PRL3C1	0	NA	NA	NA	NA	NA
ENSMUSG00000017929	B4GALT5	528.743	1.01686	0.269554	3.77236	0.000161712	0.00188445
ENSMUSG00000017943	GDAP1L1	5.84535	1.97439	0.626475	3.15158	0.00162387	0.0120888
ENSMUSG00000017950	HNF4A	9.65232	0.312435	0.550809	0.56723	0.570558	0.754718
ENSMUSG00000017969	PTGIS	1.49965	-0.036129	0.562203	-0.0642632	0.948761	NA
ENSMUSG00000017978	CADPS2	3.10125	-0.495015	0.672171	-0.736442	0.461462	0.668559
ENSMUSG00000017999	DDX27	3738.51	0.0532535	0.131624	0.404588	0.68578	0.831014
ENSMUSG00000018001	CYTH3	564.064	-0.456364	0.236482	-1.9298	0.053631	0.162404
ENSMUSG00000018008	CYTH4	3565.02	-0.91923	0.28092	-3.27221	0.00106709	0.00869858
ENSMUSG00000018012	RAC3	14.344	-0.0824753	0.457988	-0.180082	0.857089	0.933916
ENSMUSG00000018040	RRP7A	4166.71	-0.223739	0.161679	-1.38385	0.166405	0.352528
ENSMUSG00000018042	CYB5R3	2066.71	-0.0481655	0.14216	-0.338811	0.734752	0.861397
ENSMUSG00000018068	INTS2	1247.18	-0.00116596	0.198583	-0.00587139	0.995315	0.999508
ENSMUSG00000018076	MED13L	4779.77	0.213672	0.231456	0.923166	0.355921	0.573206
ENSMUSG00000018102	HIST1H2BC	681.057	1.36253	0.303693	4.48653	7.23909e-06	0.000146558
ENSMUSG00000018126	BAIAP2L2	9.70889	0.0545202	0.49328	0.110526	0.911992	0.959522
ENSMUSG00000018143	MAFK	2466.27	-0.366625	0.141169	-2.59706	0.00940262	0.0459446
ENSMUSG00000018160	MED1	4267.65	0.232766	0.155562	1.49629	0.134578	0.306061
ENSMUSG00000018166	ERBB3	406.057	-0.829679	0.247752	-3.34883	0.000811536	0.0069897
ENSMUSG00000018167	STARD3	2044.16	-0.491233	0.192056	-2.55775	0.0105351	0.0502643
ENSMUSG00000018168	IKZF3	3845.6	1.86103	0.422648	4.40327	1.06634e-05	0.000200229
ENSMUSG00000018169	MFNG	2247.05	0.00310719	0.153316	0.0202666	0.983831	0.994348
ENSMUSG00000018171	VMP1	2497.23	0.10797	0.116571	0.926215	0.354334	0.571561
ENSMUSG00000018189	UCHL5	1673.02	0.637904	0.260095	2.45258	0.0141836	0.0625694
ENSMUSG00000018196	GLRX2	859.664	0.0927888	0.120581	0.769512	0.441589	0.650919
ENSMUSG00000018199	TROVE2	317.29	0.771215	0.269673	2.85982	0.00423884	0.0253417
ENSMUSG00000018209	STK4	13939.4	0.209186	0.1636	1.27865	0.201022	0.399628
ENSMUSG00000018211	WFDC15B	0	NA	NA	NA	NA	NA
ENSMUSG00000018217	PMP22	1.54259	-0.15794	0.657925	-0.240058	0.810286	NA
ENSMUSG00000018238	GDF9	11.8891	0.281095	0.439087	0.640182	0.522055	0.71783
ENSMUSG00000018239	ZCCHC10	401.506	0.208709	0.140929	1.48096	0.138618	0.311461
ENSMUSG00000018259	PRL8A2	0	NA	NA	NA	NA	NA
ENSMUSG00000018263	TBX5	0	NA	NA	NA	NA	NA
ENSMUSG00000018286	PSMB6	4847.25	-0.197003	0.174034	-1.13198	0.257644	0.466352
ENSMUSG00000018287	SPAG7	1773.68	-0.102029	0.089058	-1.14564	0.251943	0.459439
ENSMUSG00000018293	PFN1	37514.5	-0.135827	0.210995	-0.643746	0.51974	0.715966
ENSMUSG00000018322	TOMM34	2054.14	-0.513792	0.112431	-4.56984	4.88103e-06	0.000104942
ENSMUSG00000018326	YWHAB	8660.54	-0.0179913	0.0938744	-0.191653	0.848014	0.92933
ENSMUSG00000018334	KSR1	1309.31	0.543763	0.16575	3.28063	0.00103577	0.0085324
ENSMUSG00000018339	GPX3	1.28534	-0.134368	0.668621	-0.200963	0.840728	NA
ENSMUSG00000018340	ANXA6	16436.9	-0.337778	0.266019	-1.26975	0.204174	0.403191
ENSMUSG00000018341	IL12RB2	1297.17	0.538808	0.307967	1.74957	0.080193	0.214213
ENSMUSG00000018347	ZKSCAN6	893.562	-0.45382	0.166904	-2.71905	0.00654693	0.0351526
ENSMUSG00000018362	KPNA2	3396.92	-0.205184	0.540291	-0.379766	0.704119	0.843135
ENSMUSG00000018363	SMURF2	1317.1	0.724806	0.26244	2.7618	0.00574831	0.0318425
ENSMUSG00000018372	CEP95	701.661	-0.679066	0.133164	-5.09945	3.40634e-07	1.06332e-05
ENSMUSG00000018377	VEZF1	3435.1	0.515132	0.191502	2.68995	0.00714622	0.0375199
ENSMUSG00000018378	CUEDC1	475.598	-0.758309	0.327116	-2.31817	0.0204402	0.0816848
ENSMUSG00000018379	SRSF1	12943.3	0.255383	0.229709	1.11177	0.266238	0.476315
ENSMUSG00000018381	ABI3	5109.2	-0.932831	0.210833	-4.42449	9.66693e-06	0.000185364
ENSMUSG00000018387	SHROOM1	0.121388	-0.057061	0.301474	-0.189274	0.849878	NA
ENSMUSG00000018395	KIF3A	309.382	-0.953318	0.218267	-4.36767	1.25577e-05	0.000230024
ENSMUSG00000018398	SEPT8	79.0684	-0.590663	0.51826	-1.1397	0.254409	0.462612
ENSMUSG00000018401	MTMR4	2237.25	-0.175644	0.0904398	-1.94211	0.0521241	0.158876
ENSMUSG00000018405	MRM1	821.925	-0.147317	0.175597	-0.838948	0.401499	0.615927
ENSMUSG00000018411	MAPT	3.56264	-0.179219	0.671395	-0.266936	0.789519	0.894993
ENSMUSG00000018412	KANSL1	5009.76	0.0223585	0.116157	0.192485	0.847362	0.928971
ENSMUSG00000018415	GID4	2209.88	0.222038	0.180248	1.23185	0.218006	0.4199
ENSMUSG00000018417	MYO1B	7.85085	-0.690049	0.62514	-1.10383	0.269666	0.480599
ENSMUSG00000018425	DHX40	2420.36	0.171718	0.237601	0.722716	0.469854	0.675315
ENSMUSG00000018427	YPEL2	1478.79	-1.15237	0.294975	-3.90668	9.35744e-05	0.0012038
ENSMUSG00000018428	AKAP1	1447.32	-0.0661101	0.244055	-0.270882	0.786482	0.893025
ENSMUSG00000018433	NOL11	2092.44	-0.044288	0.121772	-0.363695	0.716085	0.850004
ENSMUSG00000018442	DERL2	1034.03	0.0890752	0.110659	0.804949	0.420849	0.632967
ENSMUSG00000018446	C1QBP	4807.23	-0.14387	0.213462	-0.673985	0.500321	0.701004
ENSMUSG00000018449	RPAIN	561.124	0.150202	0.146951	1.02212	0.306723	0.522651
ENSMUSG00000018451	6330403K07RIK	15.4246	1.28859	0.627247	2.05436	0.0399409	0.132443
ENSMUSG00000018459	SLC13A3	5.43609	0.480889	0.629429	0.764008	0.444862	0.653405
ENSMUSG00000018470	KCNAB3	168.102	-0.0553605	0.30894	-0.179195	0.857784	0.934205
ENSMUSG00000018474	CHD3	22687.2	0.361122	0.176194	2.04957	0.0404062	0.133472
ENSMUSG00000018476	KDM6B	7964.5	-0.246161	0.221648	-1.11059	0.266743	0.47702
ENSMUSG00000018479	1700125H20RIK	0.580549	-0.250469	0.527555	-0.474773	0.634949	NA
ENSMUSG00000018481	APPBP2	3403.62	0.395838	0.148691	2.66215	0.00776427	0.0398881
ENSMUSG00000018486	WNT9B	0.0524242	0	0.301474	0	1	NA
ENSMUSG00000018500	ADORA2B	36.2053	2.30048	0.56493	4.07216	4.65797e-05	0.000680111
ENSMUSG00000018501	NCOR1	14515.7	0.020766	0.152749	0.135948	0.891862	0.950436
ENSMUSG00000018507	TRPV2	4712.35	0.152784	0.25053	0.609842	0.541966	0.734002
ENSMUSG00000018509	CENPV	160.927	-0.7988	0.395652	-2.01894	0.0434931	0.140674
ENSMUSG00000018537	PCGF2	51.844	-0.281705	0.442784	-0.636213	0.524638	0.7199
ENSMUSG00000018541	CWC25	1471.14	-0.107148	0.102496	-1.04539	0.295842	0.510585
ENSMUSG00000018543	1700001P01RIK	2.08224	0.415363	0.660401	0.628956	0.529378	NA
ENSMUSG00000018547	PIP4K2B	5660.37	-0.100847	0.150043	-0.672119	0.501508	0.702063
ENSMUSG00000018548	TRIM37	2330.09	0.14274	0.275211	0.518657	0.604	0.777194
ENSMUSG00000018554	YBX2	92.032	-0.0259656	0.661802	-0.0392346	0.968703	0.98764
ENSMUSG00000018559	CTDNEP1	3468.25	-0.109102	0.136749	-0.797826	0.424971	0.636813
ENSMUSG00000018565	ELP5	1782.85	-0.235053	0.138534	-1.69672	0.0897497	0.2313
ENSMUSG00000018566	SLC2A4	7.25137	0.0490198	0.624478	0.0784971	0.937433	0.972311
ENSMUSG00000018567	GABARAP	5453.72	-0.507273	0.174026	-2.91493	0.00355768	0.0219169
ENSMUSG00000018569	CLDN7	0.674248	0.241632	0.381183	0.6339	0.526146	NA
ENSMUSG00000018570	2810408A11RIK	287.572	-0.0203314	0.15706	-0.12945	0.897002	0.952079
ENSMUSG00000018572	PHF23	3024.02	0.00110874	0.155171	0.00714524	0.994299	0.99916
ENSMUSG00000018574	ACADVL	2053.67	-0.265316	0.177538	-1.49441	0.135068	0.306791
ENSMUSG00000018581	DNAH11	20.0044	-0.616645	0.39192	-1.5734	0.115627	0.277074
ENSMUSG00000018583	G3BP1	14088.8	-0.0494302	0.139584	-0.354124	0.723246	0.854677
ENSMUSG00000018585	ATOX1	1022.57	-0.585391	0.203278	-2.87976	0.00397981	0.0240017
ENSMUSG00000018589	GLRA2	0	NA	NA	NA	NA	NA
ENSMUSG00000018593	SPARC	2.3188	-0.173652	0.670512	-0.258984	0.795648	0.898742
ENSMUSG00000018595	GLRA4	0	NA	NA	NA	NA	NA
ENSMUSG00000018599	MIEF2	448.248	-0.179233	0.195003	-0.919126	0.35803	0.575491
ENSMUSG00000018604	TBX3	0.0945778	0.032642	0.301474	0.108275	0.913778	NA
ENSMUSG00000018620	MMP20	0	NA	NA	NA	NA	NA
ENSMUSG00000018623	MMP7	0	NA	NA	NA	NA	NA
ENSMUSG00000018634	CRHR1	0	NA	NA	NA	NA	NA
ENSMUSG00000018648	DUSP14	3.67734	-1.00725	0.65639	-1.53453	0.124901	0.291475
ENSMUSG00000018651	TADA2A	552.994	-0.509166	0.197718	-2.57521	0.0100179	0.0482432
ENSMUSG00000018654	IKZF1	29283.2	0.675147	0.117426	5.74954	8.9485e-09	4.39755e-07
ENSMUSG00000018656	TCAF3	0	NA	NA	NA	NA	NA
ENSMUSG00000018659	PNPO	1334.63	-0.85317	0.189954	-4.49145	7.07385e-06	0.000144159
ENSMUSG00000018661	COG1	2008.1	-0.088707	0.152011	-0.583556	0.559519	0.746497
ENSMUSG00000018666	CBX1	4214.26	0.0746561	0.164448	0.453979	0.649844	0.808099
ENSMUSG00000018669	CDK5RAP3	3198.39	-0.333365	0.162957	-2.04573	0.0407831	0.134304
ENSMUSG00000018672	COPZ2	4.38733	-0.459933	0.632125	-0.727598	0.46686	0.673148
ENSMUSG00000018677	SLC25A39	2553.98	-0.457547	0.186428	-2.45429	0.0141164	0.0623529
ENSMUSG00000018678	SP2	1905.2	-0.201507	0.148529	-1.35669	0.17488	0.364554
ENSMUSG00000018697	AATF	1889.99	-0.168538	0.175978	-0.957724	0.338202	0.554355
ENSMUSG00000018698	LHX1	0	NA	NA	NA	NA	NA
ENSMUSG00000018707	DYNC1H1	20948.2	-0.0113623	0.153295	-0.0741205	0.940915	0.973836
ENSMUSG00000018727	CPSF4L	112.249	-1.18029	0.649218	-1.81802	0.0690617	0.193683
ENSMUSG00000018733	PEX12	478.912	-0.0374698	0.147685	-0.253715	0.799716	0.901148
ENSMUSG00000018736	NDEL1	1283.24	0.0347479	0.105516	0.329315	0.741918	0.865648
ENSMUSG00000018740	SLC25A35	321.692	-0.343344	0.234497	-1.46418	0.143146	0.318184
ENSMUSG00000018750	ZBTB4	804.789	-1.39176	0.289207	-4.81234	1.49174e-06	3.82383e-05
ENSMUSG00000018752	TNFSFM13	2.66226	-0.119144	0.67085	-0.177601	0.859036	0.934799
ENSMUSG00000018761	MPDU1	1735.48	0.308752	0.154964	1.99241	0.0463262	0.146365
ENSMUSG00000018765	FXR2	3336.46	0.227232	0.116423	1.95178	0.0509648	0.156507
ENSMUSG00000018770	ATP5G3	6223.89	-0.228519	0.154539	-1.47871	0.139217	0.312358
ENSMUSG00000018774	CD68	93.6224	-0.00212925	0.288637	-0.0073769	0.994114	0.999139
ENSMUSG00000018776	SLC35G3	7.62617	-0.989953	0.605441	-1.63509	0.102029	0.2539
ENSMUSG00000018796	ACSL1	342.257	0.922039	0.24749	3.72556	0.000194882	0.0022009
ENSMUSG00000018800	ABCA5	9.31614	2.27099	0.530102	4.28406	1.83515e-05	0.000315961
[truncated: 46,796 more rows]

## Sheet: 3 hours KO vs HET unfiltered
ID	gene	baseMean	log2FoldChange	lfcSE	stat	pvalue	padj
ENSMUSG00000000001	GNAI3	10504.4	-0.127976	0.282729	-0.452647	0.650803	0.862437
ENSMUSG00000000003	PBSN	0	NA	NA	NA	NA	NA
ENSMUSG00000000028	CDC45	1597.1	0.159365	0.334397	0.476574	0.633666	0.853066
ENSMUSG00000000031	H19	10327.6	-0.660976	0.583774	-1.13225	0.257531	0.568767
ENSMUSG00000000037	SCML2	65.5556	0.234884	0.368382	0.637609	0.523728	0.788803
ENSMUSG00000000049	APOH	1.70369	-0.471831	0.671183	-0.702984	0.482066	NA
ENSMUSG00000000056	NARF	1982.71	0.355914	0.217232	1.63841	0.101337	0.342975
ENSMUSG00000000058	CAV2	2.00738	-0.0771908	0.672734	-0.114742	0.90865	NA
ENSMUSG00000000078	KLF6	1647.36	-0.252101	0.258412	-0.975576	0.329274	0.641296
ENSMUSG00000000085	SCMH1	1195.44	0.212206	0.158638	1.33768	0.181002	0.475665
ENSMUSG00000000088	COX5A	3359.84	-0.0905514	0.154457	-0.586256	0.557703	0.809221
ENSMUSG00000000093	TBX2	2.0632	-0.89036	0.672096	-1.32475	0.185254	NA
ENSMUSG00000000094	TBX4	0.424463	-0.0428985	0.282619	-0.151789	0.879353	NA
ENSMUSG00000000103	ZFY2	0	NA	NA	NA	NA	NA
ENSMUSG00000000120	NGFR	36.6058	-2.23966	0.573246	-3.90698	9.34567e-05	0.00228332
ENSMUSG00000000125	WNT3	0.884114	1.02118	0.619018	1.64968	0.0990079	NA
ENSMUSG00000000126	WNT9A	4.84536	1.59653	0.63526	2.5132	NA	NA
ENSMUSG00000000127	FER	44.1557	1.47979	0.374703	3.94925	7.83956e-05	0.0020006
ENSMUSG00000000131	XPO6	5793.68	-0.224263	0.127801	-1.75478	0.0792971	0.297084
ENSMUSG00000000134	TFE3	1402.18	0.813798	0.201695	4.0348	5.46484e-05	0.00150633
ENSMUSG00000000142	AXIN2	891.911	0.622497	0.224017	2.7788	0.00545609	0.0502279
ENSMUSG00000000148	BRAT1	1370.78	0.157951	0.150912	1.04664	0.295264	0.609084
ENSMUSG00000000149	GNA12	2086.33	-0.144122	0.124882	-1.15406	0.248475	0.559777
ENSMUSG00000000154	SLC22A18	1.60429	0.208598	0.661501	0.315341	0.752503	NA
ENSMUSG00000000157	ITGB2L	0.0611446	0	0.282173	0	1	NA
ENSMUSG00000000159	IGSF5	1.73872	0.475658	0.608591	0.781573	0.434466	NA
ENSMUSG00000000167	PIH1D2	37.7746	0.58957	0.358614	1.64402	0.100171	0.340975
ENSMUSG00000000168	DLAT	1677.7	-0.063788	0.0950459	-0.671128	0.502139	0.773245
ENSMUSG00000000171	SDHD	2904.19	0.0173569	0.123275	0.140798	0.88803	0.962088
ENSMUSG00000000182	FGF23	0	NA	NA	NA	NA	NA
ENSMUSG00000000183	FGF6	0.0758083	0.0395501	0.282173	0.140163	0.888532	NA
ENSMUSG00000000184	CCND2	18069.7	-0.191606	0.221006	-0.866969	0.385959	0.692375
ENSMUSG00000000194	GPR107	1676	-0.0714355	0.178061	-0.401185	0.688284	0.88212
ENSMUSG00000000197	NALCN	0	NA	NA	NA	NA	NA
ENSMUSG00000000202	BTBD17	0.660877	-0.339439	0.538731	-0.630071	0.528648	NA
ENSMUSG00000000204	SLFN4	0.813163	0.499993	0.619042	0.807689	0.419269	NA
ENSMUSG00000000214	TH	0.0984641	0	0.282173	0	1	NA
ENSMUSG00000000215	INS2	0	NA	NA	NA	NA	NA
ENSMUSG00000000216	SCNN1G	0.0945778	-0.0491284	0.282173	-0.174107	0.861781	NA
ENSMUSG00000000223	DRP2	6.79824	-0.138307	0.570186	-0.242565	0.808343	0.934266
ENSMUSG00000000244	TSPAN32	1320.87	0.208394	0.624733	0.333573	0.738702	0.904816
ENSMUSG00000000247	LHX2	18.1787	-0.681504	0.549949	-1.23921	0.215267	0.522301
ENSMUSG00000000248	CLEC2G	5.89332	0.019802	0.426156	0.0464665	0.962938	0.988666
ENSMUSG00000000253	GMPR	495.435	-0.99564	0.22273	-4.47016	7.81629e-06	0.000297857
ENSMUSG00000000263	GLRA1	0	NA	NA	NA	NA	NA
ENSMUSG00000000266	MID2	1.22492	0.738966	0.636121	1.16167	0.245368	NA
ENSMUSG00000000275	TRIM25	5331.62	0.173013	0.22244	0.777795	0.43669	0.728876
ENSMUSG00000000276	DGKE	2548.78	-0.162395	0.413468	-0.392763	0.694495	0.884641
ENSMUSG00000000278	SCPEP1	367.699	1.08082	0.301063	3.59002	0.00033065	0.00602121
ENSMUSG00000000282	MNT	2755.31	0.214998	0.197365	1.08934	0.276005	0.588994
ENSMUSG00000000290	ITGB2	8922.93	0.243173	0.345491	0.703848	0.481528	0.759807
ENSMUSG00000000295	HDDC2	635.118	-0.321655	0.185594	-1.73311	0.0830758	0.304939
ENSMUSG00000000296	TPD52L1	0.178091	0	0.282173	0	1	NA
ENSMUSG00000000301	PEMT	96.8606	0.102623	0.232312	0.441745	0.658673	0.866079
ENSMUSG00000000303	CDH1	1343.55	0.0276257	0.394675	0.0699962	0.944197	0.982359
ENSMUSG00000000305	CDH4	1.22984	-0.201815	0.656617	-0.307356	0.758572	NA
ENSMUSG00000000308	CKMT1	0.536038	0.0996532	0.432211	0.230566	0.817652	NA
ENSMUSG00000000317	BCL6B	20.556	2.06651	0.492151	4.19894	2.68164e-05	0.0008371
ENSMUSG00000000318	CLEC10A	1.92373	-0.370965	0.672571	-0.551562	0.581248	NA
ENSMUSG00000000320	ALOX12	0.681067	-0.0761077	0.428196	-0.17774	0.858927	NA
ENSMUSG00000000325	ARVCF	654.155	-0.626883	0.285768	-2.19368	0.0282582	0.156611
ENSMUSG00000000326	COMT	677.047	0.0064727	0.19712	0.0328364	0.973805	0.991721
ENSMUSG00000000339	RTCA	1129.73	-0.104004	0.098506	-1.05581	0.291054	0.605264
ENSMUSG00000000340	DBT	857.99	-0.108219	0.191264	-0.56581	0.571523	0.817133
ENSMUSG00000000346	DAZAP2	10706.9	0.052808	0.128649	0.410479	0.681454	0.878564
ENSMUSG00000000355	MCTS1	915.774	-0.0337135	0.244317	-0.137991	0.890248	0.962866
ENSMUSG00000000359	REM1	0.19907	-0.0491284	0.282173	-0.174107	0.861781	NA
ENSMUSG00000000365	RNF17	7.3812	-1.44866	0.593616	-2.4404	0.0146711	0.101751
ENSMUSG00000000374	TRAPPC10	3723.6	0.144857	0.121719	1.19009	0.234011	0.542659
ENSMUSG00000000378	CCM2	4024.59	-0.346502	0.197043	-1.75851	0.0786615	0.29541
ENSMUSG00000000381	WAP	0	NA	NA	NA	NA	NA
ENSMUSG00000000384	TBRG4	2501.15	-0.037824	0.164215	-0.230332	0.817834	0.937595
ENSMUSG00000000385	TMPRSS2	1.07585	-0.730281	0.633679	-1.15245	0.249138	NA
ENSMUSG00000000386	MX1	178.273	0.428888	0.535272	0.801253	0.422985	0.719628
ENSMUSG00000000392	FAP	1.78709	-0.135041	0.641812	-0.210406	0.833351	NA
ENSMUSG00000000394	GCG	0.0592209	0.0838894	0.282173	0.297297	0.766239	NA
ENSMUSG00000000399	NDUFA9	2995.29	-0.0793669	0.128435	-0.617952	0.536607	0.7962
ENSMUSG00000000402	EGFL6	0.558456	-0.419432	0.34221	-1.22566	0.220328	NA
ENSMUSG00000000409	LCK	47518.6	-0.343634	0.170021	-2.02113	0.0432662	0.205121
ENSMUSG00000000411	TSSK3	0.169159	0	0.282173	0	1	NA
ENSMUSG00000000416	CTTNBP2	22.0502	1.12062	0.608013	1.84309	0.0653157	0.265444
ENSMUSG00000000420	GALNT1	6324.02	-0.245344	0.200098	-1.22612	0.220154	0.527682
ENSMUSG00000000435	MYF5	0	NA	NA	NA	NA	NA
ENSMUSG00000000439	MKRN2	1523.53	-0.0763	0.0756907	-1.00805	0.313431	0.62756
ENSMUSG00000000440	PPARG	77.591	0.523879	0.48901	1.0713	0.284032	0.597817
ENSMUSG00000000441	RAF1	4201.46	-0.0544406	0.0825704	-0.659324	0.509688	0.778857
ENSMUSG00000000486	SEPT1	17715.2	-0.225974	0.181617	-1.24423	0.213414	0.519269
ENSMUSG00000000489	PDGFB	7.91076	0.811273	0.562934	1.44115	0.149542	0.430048
ENSMUSG00000000530	ACVRL1	77.3816	-0.467561	0.421941	-1.10812	0.26781	0.57993
ENSMUSG00000000531	GRASP	362.672	0.392137	0.394455	0.994124	0.320162	0.632384
ENSMUSG00000000532	ACVR1B	1555.96	-0.458678	0.184301	-2.48874	0.0128198	0.0928186
ENSMUSG00000000538	TOM1L2	907.718	0.25466	0.179202	1.42108	0.155294	0.438194
ENSMUSG00000000544	GPA33	0.356316	0.066252	0.355944	0.18613	0.852343	NA
ENSMUSG00000000552	ZFP385A	1723.47	-0.787104	0.241789	-3.25533	0.00113259	0.0152669
ENSMUSG00000000555	ITGA5	925.044	-0.841714	0.228105	-3.69003	0.000224224	0.0044689
ENSMUSG00000000560	GABRA2	0.520326	0.010059	0.468568	0.0214674	0.982873	NA
ENSMUSG00000000561	WDR77	3377.32	-0.315651	0.193109	-1.63457	0.102138	0.344518
ENSMUSG00000000562	ADORA3	25.1509	1.03425	0.444774	2.32535	0.0200533	0.125333
ENSMUSG00000000563	ATP5F1	10174.6	-0.0965755	0.144025	-0.670545	0.502511	0.773439
ENSMUSG00000000567	SOX9	0.769766	0.436264	0.603531	0.722853	0.46977	NA
ENSMUSG00000000568	HNRNPD	7961.1	-0.152457	0.22354	-0.682014	0.49523	0.768996
ENSMUSG00000000579	DYNLT1C	703.501	-0.25804	0.233796	-1.1037	0.269724	0.581866
ENSMUSG00000000581	C1D	1414.07	-0.252585	0.197655	-1.27791	0.201282	0.503499
ENSMUSG00000000594	GM2A	6527.04	0.0955274	0.177398	0.538491	0.590238	0.82916
ENSMUSG00000000600	KRIT1	1628.55	-0.00452987	0.23358	-0.0193932	0.984527	0.995524
ENSMUSG00000000605	CLCN4	2111.94	-0.00639166	0.185898	-0.0343826	0.972572	0.991348
ENSMUSG00000000606	VMN2R88	0	NA	NA	NA	NA	NA
ENSMUSG00000000617	GRM6	0.61508	0.0291728	0.48125	0.0606187	0.951663	NA
ENSMUSG00000000627	SEMA4F	260.853	1.08468	0.511255	2.12161	0.0338704	0.175738
ENSMUSG00000000628	HK2	786.74	0.445479	0.281822	1.58071	0.113944	0.367003
ENSMUSG00000000631	MYO18A	6032.76	0.225845	0.20191	1.11854	0.263335	0.57554
ENSMUSG00000000632	SEZ6	0.167738	0.0838894	0.282173	0.297297	0.766239	NA
ENSMUSG00000000673	HAAO	38.377	0.300538	0.66275	0.453471	0.650209	0.862001
ENSMUSG00000000682	CD52	5689.07	-0.615976	0.437597	-1.40763	0.15924	0.44312
ENSMUSG00000000686	ABHD15	940.379	-0.285484	0.286113	-0.997802	0.318375	0.630519
ENSMUSG00000000690	HOXB6	0	NA	NA	NA	NA	NA
ENSMUSG00000000693	LOXL3	11.1918	0.94435	0.502035	1.88104	0.059966	0.251197
ENSMUSG00000000701	TCL1B5	0	NA	NA	NA	NA	NA
ENSMUSG00000000706	BTN1A1	1.41475	1.47881	0.655461	2.25614	0.0240617	NA
ENSMUSG00000000708	KAT2B	1509.63	-0.652871	0.234746	-2.78118	0.00541616	0.0500311
ENSMUSG00000000711	RAB5B	3305.4	-0.186754	0.176982	-1.05521	0.291328	0.605556
ENSMUSG00000000724	CRYBA1	0	NA	NA	NA	NA	NA
ENSMUSG00000000730	DNMT3L	14.9379	0.592447	0.503932	1.17565	0.239735	0.549719
ENSMUSG00000000731	AIRE	65.2245	1.08314	0.481851	2.24787	0.0245844	0.143146
ENSMUSG00000000732	ICOSL	385.678	1.23051	0.286059	4.30158	1.69584e-05	0.000581044
ENSMUSG00000000738	SPG7	1908.92	0.252351	0.125465	2.01132	0.0442915	0.208203
ENSMUSG00000000739	SULT5A1	2.81751	-0.874639	0.66119	-1.32283	0.185893	0.482605
ENSMUSG00000000740	RPL13	21033.5	-0.323464	0.187805	-1.72234	0.0850082	0.310055
ENSMUSG00000000743	CHMP1A	3032.34	-0.206624	0.199661	-1.03487	0.300727	0.614605
ENSMUSG00000000751	RPA1	7314.51	0.0981072	0.14913	0.657865	0.510625	0.779373
ENSMUSG00000000753	SERPINF1	30.2651	-0.481642	0.431751	-1.11555	0.264613	0.576557
ENSMUSG00000000759	TUBGCP3	2240.36	-0.137569	0.0924659	-1.48778	0.13681	0.409098
ENSMUSG00000000766	OPRM1	0.28013	0	0.299097	0	1	NA
ENSMUSG00000000776	POLR3D	850.618	-0.325731	0.225077	-1.4472	0.147841	0.427302
ENSMUSG00000000782	TCF7	84410.3	-0.0350241	0.115685	-0.302755	0.762077	0.913621
ENSMUSG00000000787	DDX3X	17102	-0.49469	0.271678	-1.82087	0.0686261	0.274313
ENSMUSG00000000791	IL12RB1	1714.93	-0.163244	0.29595	-0.551592	0.581228	0.823418
ENSMUSG00000000792	SLC5A5	2.34866	0.127537	0.663206	0.192303	0.847505	0.948905
ENSMUSG00000000794	KCNN3	1.99808	-0.388472	0.672559	-0.577602	0.563533	NA
ENSMUSG00000000804	USP32	1401.39	0.0206065	0.196734	0.104743	0.91658	0.97254
ENSMUSG00000000805	CAR4	0.228713	-0.182146	0.282173	-0.645512	NA	NA
ENSMUSG00000000811	TXNRD3	392.377	0.830733	0.319473	2.60033	0.0093135	0.0742772
ENSMUSG00000000817	FASL	67.5288	-0.65282	0.46465	-1.40497	0.16003	0.444456
ENSMUSG00000000823	ZFP512B	2203	-0.453868	0.215926	-2.10196	0.035557	0.181233
ENSMUSG00000000826	DNAJC5	5943.64	-0.132022	0.118233	-1.11662	0.264156	0.575927
ENSMUSG00000000827	TPD52L2	1992.61	-0.1121	0.129357	-0.866596	0.386163	0.692568
ENSMUSG00000000838	FMR1	1700.15	-0.0718098	0.314894	-0.228044	0.819612	0.93831
ENSMUSG00000000861	BCL11A	112.82	0.172257	0.53024	0.324866	0.745283	0.907535
ENSMUSG00000000869	IL4	9.79724	1.13054	0.672339	1.68151	0.0926637	0.325401
ENSMUSG00000000876	PXMP4	1188.83	0.169675	0.128226	1.32325	0.185754	0.482598
ENSMUSG00000000881	DLG3	651.534	-0.275921	0.14871	-1.85544	0.0635338	0.261119
ENSMUSG00000000884	GNB1L	604.856	0.423197	0.18517	2.28546	0.0222861	0.134404
ENSMUSG00000000889	DBH	0.67598	-0.175505	0.527859	-0.332485	0.739523	NA
ENSMUSG00000000901	MMP11	131.722	-1.17521	0.360631	-3.25877	0.00111898	0.0151849
ENSMUSG00000000902	SMARCB1	3819.14	0.037857	0.155894	0.242839	0.80813	0.934266
ENSMUSG00000000903	VPREB3	0.728092	-0.376337	0.429303	-0.876623	0.380691	NA
ENSMUSG00000000915	HIP1R	1857.4	-0.399582	0.247255	-1.61607	0.106079	0.35162
ENSMUSG00000000916	NSUN5	832.776	0.0644492	0.179389	0.359271	0.719393	0.896923
ENSMUSG00000000934	TOP1MT	221.593	-0.115697	0.203619	-0.568202	0.569898	0.816399
ENSMUSG00000000938	HOXA10	0.735732	-0.463579	0.460706	-1.00624	0.314302	NA
ENSMUSG00000000942	HOXA4	8.58454	0.504852	0.589791	0.855985	0.392006	0.696684
ENSMUSG00000000948	GM38393	0.024507	0	0.282173	0	1	NA
ENSMUSG00000000957	MMP14	97.8531	0.834784	0.454408	1.83708	0.0661978	0.267906
ENSMUSG00000000958	SLC7A7	36.0503	-0.403155	0.370697	-1.08756	0.276789	0.590081
ENSMUSG00000000959	OXA1L	3248.01	0.214115	0.137505	1.55714	0.119437	0.376801
ENSMUSG00000000976	HEATR6	1604.81	-0.180398	0.124274	-1.45161	0.14661	0.425452
ENSMUSG00000000982	CCL3	96.5099	-0.0493054	0.6693	-0.0736671	0.941275	0.981387
ENSMUSG00000000983	WFDC18	0.29934	0	0.282173	0	1	NA
ENSMUSG00000001014	ICAM4	10.9151	0.450619	0.536039	0.840646	0.400547	0.701997
ENSMUSG00000001016	ILF2	4116.54	0.0899033	0.127478	0.705244	0.480658	0.759585
ENSMUSG00000001017	CHTOP	7351.63	-0.0826621	0.0912318	-0.906067	0.3649	0.674434
ENSMUSG00000001018	SNAPIN	1006.35	-0.25566	0.174516	-1.46496	0.142932	0.419601
ENSMUSG00000001020	S100A4	971.186	2.12286	0.657804	3.22719	0.00125013	0.0164516
ENSMUSG00000001021	S100A3	8.28002	0.297353	0.671988	0.442498	0.658129	0.865876
ENSMUSG00000001023	S100A5	0.397335	0.154734	0.282726	0.547291	0.584179	NA
ENSMUSG00000001025	S100A6	385.24	1.77022	0.638027	2.77452	0.00552831	0.0507672
ENSMUSG00000001027	SCN4A	3.09747	0.373211	0.670073	0.556971	0.577547	0.820857
ENSMUSG00000001029	ICAM2	1459.55	-0.140736	0.188611	-0.746171	0.455564	0.743192
ENSMUSG00000001034	MAPK7	986.141	0.165658	0.252843	0.65518	0.512352	0.78053
ENSMUSG00000001036	EPN2	16.463	-0.694355	0.466839	-1.48736	0.136921	0.409144
ENSMUSG00000001039	B9D1	81.4496	0.117293	0.450555	0.26033	0.794609	0.928234
ENSMUSG00000001052	SEC24B	4418.5	0.0521712	0.127063	0.410592	0.681371	0.878564
ENSMUSG00000001053	N4BP3	696.953	-0.411869	0.242426	-1.69895	0.0893291	0.319099
ENSMUSG00000001054	RMND5B	2087.78	-0.120928	0.187189	-0.646021	0.518266	0.784698
ENSMUSG00000001056	NHP2	2672.3	-0.277617	0.225745	-1.22978	0.218778	0.525987
ENSMUSG00000001062	VPS9D1	582.835	0.226516	0.201916	1.12183	0.261933	0.573772
ENSMUSG00000001065	ZFP276	793.262	0.0216747	0.155757	0.139157	0.889326	0.962492
ENSMUSG00000001076	C1QL4	0.269458	0	0.282173	0	1	NA
ENSMUSG00000001082	MFSD10	1241.76	0.094394	0.155242	0.608044	0.543158	0.801084
ENSMUSG00000001089	LUZP1	768.804	1.34201	0.232313	5.77673	7.61685e-09	8.67615e-07
ENSMUSG00000001095	SLC13A2	0.686268	-0.131544	0.36372	-0.361664	0.717603	NA
ENSMUSG00000001098	KCTD10	3193.01	0.289609	0.214099	1.35269	0.176156	0.468297
ENSMUSG00000001100	POLDIP2	2450.25	-0.0590575	0.166325	-0.355072	0.722536	0.898497
ENSMUSG00000001103	SEBOX	1.74179	0.447287	0.288927	1.5481	NA	NA
ENSMUSG00000001105	IFT20	1021.83	-0.268278	0.113615	-2.36128	0.0182118	0.117849
ENSMUSG00000001119	COL6A1	5.70206	0.641927	0.663507	0.967477	NA	NA
ENSMUSG00000001120	PCBP3	344.577	-0.553909	0.231911	-2.38845	0.0169194	0.112067
ENSMUSG00000001123	LGALS9	15799	0.269512	0.18742	1.43801	0.150432	0.43131
ENSMUSG00000001127	ARAF	1806.87	-0.188847	0.138126	-1.3672	0.171562	0.461145
ENSMUSG00000001128	CFP	98.163	0.151565	0.299551	0.505974	0.612875	0.842162
ENSMUSG00000001131	TIMP1	0.677084	-0.24279	0.595639	-0.407612	0.683558	NA
ENSMUSG00000001134	UXT	535.868	-0.281645	0.160267	-1.75735	0.0788575	0.295759
ENSMUSG00000001138	CNNM3	1375.68	-0.0629216	0.107196	-0.586977	0.557219	0.809207
ENSMUSG00000001143	LMAN2L	2982.77	0.0998358	0.209507	0.476527	0.633699	0.853066
ENSMUSG00000001150	MCM3AP	3763.57	0.102401	0.107041	0.956647	0.338745	0.650997
ENSMUSG00000001151	PCNT	3544.26	0.263158	0.185522	1.41847	0.156053	0.43901
ENSMUSG00000001155	FTCD	0.0309578	0.0395501	0.282173	0.140163	0.888532	NA
ENSMUSG00000001156	MXD1	901.323	0.938215	0.224094	4.1867	2.83041e-05	0.00086779
ENSMUSG00000001157	GMCL1	1571.47	0.113809	0.200952	0.566347	0.571158	0.817108
ENSMUSG00000001158	SNRNP27	1540.53	-0.413893	0.1438	-2.87826	0.0039988	0.0401045
ENSMUSG00000001166	OAS1C	281.631	-0.141355	0.280121	-0.504621	0.613825	0.842431
ENSMUSG00000001168	OAS1H	0	NA	NA	NA	NA	NA
ENSMUSG00000001173	OCRL	453.869	-0.700621	0.189322	-3.70068	0.000215023	0.00430547
ENSMUSG00000001175	CALM1	13298.8	0.238612	0.181135	1.31731	0.187733	0.485565
ENSMUSG00000001211	AGPAT3	4319.1	-0.325118	0.196484	-1.65468	0.0979901	0.336905
ENSMUSG00000001225	SLC26A3	0.0289605	0	0.282173	0	1	NA
ENSMUSG00000001227	SEMA6B	80.1059	-0.652333	0.361703	-1.80351	0.0713088	0.279451
ENSMUSG00000001228	UHRF1	13700.7	-0.434054	0.305808	-1.41936	0.155793	0.438781
ENSMUSG00000001229	DPP9	3033.22	0.0382751	0.111444	0.343445	0.731263	0.902535
ENSMUSG00000001240	RAMP2	12.9069	0.310378	0.641116	0.484122	0.628299	0.850956
ENSMUSG00000001247	LSR	106.483	-2.24182	0.378449	-5.9237	3.14773e-09	3.98095e-07
ENSMUSG00000001248	GRAMD1A	4364.42	0.0895459	0.348234	0.257143	0.797069	0.929148
ENSMUSG00000001249	HPN	6.81971	1.29665	0.594639	2.18057	0.0292151	0.15993
ENSMUSG00000001260	GABRG1	0.122289	0	0.282173	0	1	NA
ENSMUSG00000001270	CKB	103.635	-0.552633	0.454767	-1.2152	0.22429	0.53233
ENSMUSG00000001280	SP1	6802.54	-0.236798	0.195852	-1.20906	0.226638	0.53473
ENSMUSG00000001281	ITGB7	6333.13	0.525196	0.60295	0.871043	0.383731	0.690611
ENSMUSG00000001285	MYG1	1679.75	-0.242249	0.182229	-1.32937	0.183725	0.479331
ENSMUSG00000001288	RARG	231.733	1.5049	0.597294	2.51953	0.0117513	0.0873477
ENSMUSG00000001289	PFDN5	4605.02	-0.326478	0.18258	-1.78814	0.0737535	0.284175
ENSMUSG00000001300	EFNB2	26.2632	1.50519	0.372167	4.0444	5.24563e-05	0.00145759
ENSMUSG00000001305	RRP15	1193.76	-0.402534	0.191138	-2.10599	0.0352052	0.180172
ENSMUSG00000001313	RND2	152.446	0.820209	0.243354	3.37043	0.000750504	0.0111957
ENSMUSG00000001323	SRR	656.243	-0.235134	0.120603	-1.94965	0.0512174	0.227859
ENSMUSG00000001333	SYNC	0.236108	0.128229	0.282173	0.454432	0.649518	NA
ENSMUSG00000001334	FNDC5	0.083621	0	0.282173	0	1	NA
ENSMUSG00000001348	ACP5	2632.34	-1.02009	0.365434	-2.79145	0.00524728	0.0490773
ENSMUSG00000001349	CNN1	0.141424	0	0.282173	0	1	NA
ENSMUSG00000001366	FBXO9	1379.14	-0.0555489	0.166861	-0.332906	0.739206	0.904963
ENSMUSG00000001376	VPS50	797.108	-0.375956	0.21225	-1.77129	0.0765129	0.291326
ENSMUSG00000001380	HARS	2958.15	-0.132531	0.10859	-1.22047	0.222285	0.529984
ENSMUSG00000001383	ZMAT2	3321.97	0.00845472	0.102521	0.0824684	0.934274	0.978402
ENSMUSG00000001403	UBE2C	1978.05	0.533152	0.377662	1.41172	0.158033	0.441812
ENSMUSG00000001415	SMG5	4303.84	-0.286	0.145309	-1.96823	0.049042	0.221998
ENSMUSG00000001416	CCT3	10616.4	-0.166187	0.170121	-0.976873	0.328632	0.640942
ENSMUSG00000001418	GLMP	2764.73	-0.230578	0.199005	-1.15866	0.246595	0.557644
ENSMUSG00000001419	MEF2D	8223.21	0.0905696	0.183741	0.49292	0.622069	0.847156
ENSMUSG00000001420	TMEM79	69.9127	0.741508	0.263958	2.80919	0.00496664	0.0471447
ENSMUSG00000001424	SND1	8592.41	-0.256409	0.146368	-1.75181	0.0798057	0.298205
ENSMUSG00000001435	COL18A1	1.73769	0.298551	0.654079	0.456445	0.64807	NA
ENSMUSG00000001436	SLC19A1	1219.89	0.0555901	0.260229	0.21362	0.830843	0.943849
ENSMUSG00000001440	KPNB1	17943.2	-0.074027	0.137646	-0.537807	0.59071	0.829382
ENSMUSG00000001441	NPEPPS	3214.45	0.152406	0.0968955	1.57289	0.115743	0.369897
ENSMUSG00000001444	TBX21	43.457	1.68842	0.542667	3.11134	0.00186238	0.0226541
ENSMUSG00000001445	MRPL10	1919.95	-0.0385437	0.13287	-0.290087	0.77175	0.918586
ENSMUSG00000001467	CYP51	2395.69	-0.546512	0.248397	-2.20015	0.027796	0.154922
ENSMUSG00000001472	TCF25	14013.4	-0.327013	0.126097	-2.59334	0.00950486	0.0753293
ENSMUSG00000001473	TUBB6	8.36653	-0.27648	0.535067	-0.516719	0.605352	0.83806
ENSMUSG00000001482	DEF8	2343.79	0.0355987	0.185687	0.191714	0.847967	0.94896
ENSMUSG00000001493	MEOX1	0	NA	NA	NA	NA	NA
ENSMUSG00000001494	SOST	0	NA	NA	NA	NA	NA
ENSMUSG00000001496	NKX2-1	0	NA	NA	NA	NA	NA
ENSMUSG00000001497	PAX9	2.02793	-0.880249	0.662506	-1.32867	0.183958	NA
ENSMUSG00000001504	IRX2	0.464377	0.0706062	0.418756	0.168609	0.866104	NA
ENSMUSG00000001506	COL1A1	29.7443	-0.489188	0.410306	-1.19225	0.233162	0.542098
ENSMUSG00000001507	ITGA3	78.3598	2.66359	0.415683	6.40774	1.47688e-10	3.02409e-08
ENSMUSG00000001508	SGCA	1.86537	-2.00663	0.659818	-3.04118	0.00235653	NA
ENSMUSG00000001510	DLX3	0.492466	0.324503	0.387486	0.837458	0.402335	NA
ENSMUSG00000001517	FOXM1	1882.93	0.672919	0.359459	1.87203	0.0612024	0.25481
ENSMUSG00000001518	ITFG2	752.28	0.0425315	0.143401	0.296591	0.766779	0.916594
ENSMUSG00000001520	NRIP2	1.60875	0.122652	0.669164	0.183292	0.854569	NA
ENSMUSG00000001521	TULP3	410.133	0.0606488	0.238766	0.254009	0.799489	0.930012
ENSMUSG00000001524	GTF2H4	864.677	-0.180977	0.19242	-0.940529	0.346946	0.657356
ENSMUSG00000001525	TUBB5	49811.6	-0.286923	0.170574	-1.6821	0.09255	0.325274
ENSMUSG00000001542	ELL2	122.73	2.15814	0.350634	6.15498	7.50865e-10	1.19582e-07
ENSMUSG00000001552	JUP	493.17	-2.20765	0.576706	-3.82803	0.000129172	0.00293884
ENSMUSG00000001555	FKBP10	19.1733	-3.39804	0.619318	-5.48675	NA	NA
ENSMUSG00000001558	KLHL10	29.712	0.423538	0.371901	1.13884	0.254768	0.567324
ENSMUSG00000001566	MNX1	0.0264254	0	0.282173	0	1	NA
ENSMUSG00000001569	NOM1	2063.37	0.0311571	0.115904	0.268818	0.788069	0.925368
ENSMUSG00000001576	ERGIC1	4059.34	-0.144368	0.144481	-0.999219	0.317689	0.630055
ENSMUSG00000001583	TNK1	1.19985	-0.849832	0.642659	-1.32237	0.186046	NA
ENSMUSG00000001588	ACAP1	11342.4	-0.0518506	0.184683	-0.280754	0.778899	0.921077
ENSMUSG00000001604	TCEA3	0.516852	0	0.471231	0	1	NA
ENSMUSG00000001622	CSN3	0	NA	NA	NA	NA	NA
ENSMUSG00000001627	IFRD1	1004.73	0.133326	0.196366	0.678967	0.497158	0.769989
ENSMUSG00000001630	STK38L	309.384	0.660399	0.157419	4.19516	2.72677e-05	0.000845846
ENSMUSG00000001632	BRPF1	3133.89	0.103913	0.096144	1.0808	0.279785	0.593446
ENSMUSG00000001642	AKR1B3	9154.54	-0.0274285	0.156917	-0.174796	0.86124	0.953115
ENSMUSG00000001655	HOXC13	0	NA	NA	NA	NA	NA
ENSMUSG00000001656	HOXC11	0	NA	NA	NA	NA	NA
ENSMUSG00000001657	HOXC8	0	NA	NA	NA	NA	NA
ENSMUSG00000001661	HOXC6	0	NA	NA	NA	NA	NA
ENSMUSG00000001663	GSTT1	6.79136	1.52719	0.628698	2.42913	0.0151352	0.103881
ENSMUSG00000001665	GSTT3	164.929	0.323705	0.252311	1.28296	0.199505	0.501314
ENSMUSG00000001666	DDT	1179.85	0.607466	0.181576	3.34552	0.000821289	0.012053
ENSMUSG00000001670	TAT	0	NA	NA	NA	NA	NA
ENSMUSG00000001672	MARVELD3	0.0309578	0.0395501	0.282173	0.140163	0.888532	NA
ENSMUSG00000001674	DDX18	3886.93	-0.171753	0.14155	-1.21338	0.224986	0.532822
ENSMUSG00000001687	UBL3	1352.34	0.10259	0.183932	0.55776	0.577008	0.820671
ENSMUSG00000001700	GRAMD3	66.124	-1.14566	0.625444	-1.83175	NA	NA
ENSMUSG00000001707	EEF1E1	1362.48	-0.182961	0.193034	-0.94782	0.343221	0.654122
ENSMUSG00000001729	AKT1	8321.97	-0.197959	0.15971	-1.23948	0.215166	0.52213
ENSMUSG00000001739	CLDN15	3.89644	1.50166	0.644991	2.32819	0.0199018	0.124613
ENSMUSG00000001741	IL16	9219.36	-0.168398	0.167941	-1.00272	0.315995	0.629064
ENSMUSG00000001750	TCIRG1	1741.25	0.174756	0.176754	0.988699	0.322811	0.635061
ENSMUSG00000001751	NAGLU	565.131	-0.477992	0.210907	-2.26636	0.0234292	0.13872
ENSMUSG00000001755	COASY	1054.76	0.160268	0.170876	0.937923	0.348284	0.658875
ENSMUSG00000001761	SMO	5906.97	0.457421	0.264678	1.72822	0.0839496	0.307482
ENSMUSG00000001763	TSPAN33	8.42562	-0.978686	0.535045	-1.82916	0.0673749	0.271139
ENSMUSG00000001767	CRNKL1	2136.86	-0.319603	0.128122	-2.49452	0.0126129	0.0918465
ENSMUSG00000001768	RIN2	15.7021	0.957723	0.387025	2.47458	0.0133394	0.095599
ENSMUSG00000001773	FOLH1	0.0418921	-0.0491284	0.282173	-0.174107	0.861781	NA
ENSMUSG00000001774	CHORDC1	2748.67	-0.352938	0.210822	-1.6741	0.0941105	0.328673
ENSMUSG00000001783	RTCB	6498.37	-0.017274	0.115485	-0.149578	0.881097	0.96019
ENSMUSG00000001785	PWP1	2667.29	-0.0271509	0.118653	-0.228825	0.819005	0.938145
ENSMUSG00000001786	FBXO7	1579.5	-0.177186	0.104589	-1.69412	0.0902418	0.320729
ENSMUSG00000001794	CAPNS1	7762.86	0.136715	0.211604	0.646089	0.518222	0.784698
ENSMUSG00000001802	LRP3	0.093726	-0.0491284	0.282173	-0.174107	0.861781	NA
ENSMUSG00000001804	DSG4	0	NA	NA	NA	NA	NA
ENSMUSG00000001815	EVX2	0	NA	NA	NA	NA	NA
ENSMUSG00000001819	HOXD13	0	NA	NA	NA	NA	NA
ENSMUSG00000001823	HOXD12	0	NA	NA	NA	NA	NA
ENSMUSG00000001827	FOLR1	0	NA	NA	NA	NA	NA
ENSMUSG00000001829	CLPB	1256.27	0.493606	0.126309	3.90793	9.30913e-05	0.00227763
ENSMUSG00000001833	SEPT7	6447.33	-0.368261	0.223515	-1.64759	0.0994372	0.34023
ENSMUSG00000001844	ZDHHC4	1376.75	0.178999	0.13851	1.29232	0.196247	0.496827
ENSMUSG00000001847	RAC1	9070.16	-0.285121	0.0947854	-3.00807	0.00262912	0.0292313
ENSMUSG00000001855	NUP214	4762.74	0.0188076	0.14066	0.13371	0.893632	0.964674
ENSMUSG00000001864	AIF1L	14.8297	-0.76147	0.589441	-1.29185	0.196408	0.49705
ENSMUSG00000001865	CPA3	9051.1	-1.76247	0.557697	-3.16027	0.00157622	0.0198325
ENSMUSG00000001870	LTBP1	3.11802	1.37877	0.671481	2.05332	0.0400416	0.195547
ENSMUSG00000001891	UGP2	937.856	-0.0929018	0.221358	-0.41969	0.674712	0.87506
ENSMUSG00000001901	KCNH6	0.233394	0.0395501	0.282173	0.140163	0.888532	NA
ENSMUSG00000001909	TRMT1	3355.47	0.155802	0.18565	0.839229	0.401341	0.702674
ENSMUSG00000001910	NACC1	9319.04	0.106435	0.167998	0.633548	0.526376	0.789954
ENSMUSG00000001911	NFIX	1339.72	0.0407898	0.263842	0.154599	0.877137	0.959168
ENSMUSG00000001918	SLC1A5	3542.11	-0.0619057	0.126107	-0.4909	0.623497	0.847539
ENSMUSG00000001924	UBA1	24759.2	0.0283958	0.151804	0.187055	0.851617	0.950248
ENSMUSG00000001930	VWF	4.54865	0.0395104	0.631293	0.0625864	0.950096	0.984259
ENSMUSG00000001942	SIAE	1375.43	-0.0051772	0.229174	-0.0225907	0.981977	0.994875
ENSMUSG00000001943	VSIG2	0.507739	0	0.331902	0	1	NA
ENSMUSG00000001946	ESAM	2.20164	0.865396	0.669907	1.29181	0.196421	0.49705
ENSMUSG00000001948	SPA17	21.7595	-0.0420809	0.358628	-0.117338	0.906592	0.968564
ENSMUSG00000001962	FAM50A	1373.11	0.00352801	0.103293	0.0341555	0.972753	0.991378
ENSMUSG00000001964	EMD	2718.11	-0.029592	0.162655	-0.181932	0.855636	0.951393
ENSMUSG00000001983	TACO1	521.927	0.028982	0.139386	0.207926	0.835287	0.945744
ENSMUSG00000001985	GRIK3	0	NA	NA	NA	NA	NA
ENSMUSG00000001986	GRIA3	1414.19	-0.432214	0.277452	-1.5578	0.119281	0.376724
ENSMUSG00000001988	NPAS1	0.457521	0.109617	0.502679	0.218065	0.827378	NA
ENSMUSG00000001995	SIPA1L2	283.205	-0.0555473	0.33305	-0.166784	0.86754	0.955478
ENSMUSG00000001998	AP4E1	576.344	-0.192716	0.251376	-0.766643	0.443294	0.733775
ENSMUSG00000001999	BLVRA	565.023	-0.505832	0.144884	-3.4913	0.000480684	0.00798623
ENSMUSG00000002006	PDZD4	700.459	-0.161833	0.324391	-0.498883	0.617862	0.844436
ENSMUSG00000002007	SRPK3	0.193163	0	0.282173	0	1	NA
ENSMUSG00000002010	IDH3G	5089.86	0.0715088	0.14917	0.479377	0.63167	0.851883
ENSMUSG00000002012	PNCK	115.777	-1.24356	0.374357	-3.32185	0.000894236	0.0128067
ENSMUSG00000002014	SSR4	2616.95	-0.42913	0.174519	-2.45894	0.0139349	0.098383
ENSMUSG00000002015	BCAP31	4139.55	-0.158882	0.114111	-1.39234	0.163819	0.449033
ENSMUSG00000002017	FAM98A	1540.71	-0.0256322	0.13414	-0.191086	0.848458	0.948988
ENSMUSG00000002020	LTBP2	0.303281	-0.00478913	0.282173	-0.0169723	0.986459	NA
ENSMUSG00000002028	KMT2A	11897.3	-0.171499	0.343841	-0.498773	0.617939	0.844475
ENSMUSG00000002031	IFT46	1294.28	-0.0242342	0.14721	-0.164623	0.869241	0.955881
ENSMUSG00000002032	TMEM25	8.92855	0.701535	0.580533	1.20843	0.226881	0.535087
ENSMUSG00000002033	CD3G	36200.9	-0.579406	0.218366	-2.65338	0.00796909	0.0665058
ENSMUSG00000002043	TRAPPC6A	794.858	-0.413865	0.232494	-1.78011	0.0750579	0.287655
ENSMUSG00000002052	SUPT6	7685.15	0.00086643	0.122954	0.00704677	0.994378	0.999374
ENSMUSG00000002055	SPAG5	1339.76	0.362565	0.36377	0.996686	0.318917	0.63106
ENSMUSG00000002057	FOXN1	4.67944	-0.67619	0.624356	-1.08302	0.2788	0.592239
ENSMUSG00000002058	UNC119	976.264	0.510922	0.311898	1.6381	0.1014	0.34312
ENSMUSG00000002059	RAB34	50.3814	-0.132798	0.514592	-0.258065	0.796357	0.928948
ENSMUSG00000002064	SDF2	1712.81	0.333568	0.205128	1.62615	0.103918	0.347555
ENSMUSG00000002068	CCNE1	519.52	0.582642	0.324077	1.79785	0.072201	0.280968
ENSMUSG00000002076	HSF2BP	46.3294	-1.2292	0.507303	-2.42302	0.0153923	0.104696
ENSMUSG00000002083	BBC3	309.925	1.09643	0.303875	3.60816	0.000308377	0.00573415
ENSMUSG00000002100	MYBPC3	0.445642	0	0.366563	0	1	NA
ENSMUSG00000002102	PSMC3	6607.42	0.0986135	0.162008	0.608697	0.542725	0.80092
ENSMUSG00000002103	ACP2	1133.49	0.0026995	0.162143	0.0166489	0.986717	0.996536
ENSMUSG00000002104	RAPSN	266.201	2.49608	0.482779	5.17022	2.33812e-07	1.57093e-05
ENSMUSG00000002105	SLC39A13	208.668	0.812522	0.249559	3.25583	0.0011306	0.015252
ENSMUSG00000002107	CELF2	8491.16	-0.0486838	0.204327	-0.238265	0.811676	0.935294
ENSMUSG00000002108	NR1H3	66.0248	0.472028	0.330257	1.42927	0.152926	0.435053
ENSMUSG00000002109	DDB2	1091.09	0.0301589	0.133325	0.226205	0.821042	0.939145
ENSMUSG00000002111	SPI1	50.6636	-0.378902	0.426024	-0.889391	0.373793	0.683178
ENSMUSG00000002129	SF3A1	8162.73	-0.0621687	0.15271	-0.407104	0.683932	0.879787
ENSMUSG00000002147	STAT6	7569.57	-0.144645	0.156758	-0.922728	0.356149	0.667004
ENSMUSG00000002190	CLGN	1.17811	0.347029	0.637972	0.543956	0.586472	NA
ENSMUSG00000002204	NAPSA	519.772	1.02793	0.451079	2.27883	0.0226772	0.135953
ENSMUSG00000002205	VRK3	2868.24	0.173008	0.162348	1.06566	0.286578	0.600749
ENSMUSG00000002210	SMG9	1322.67	0.0330867	0.183792	0.180023	0.857134	0.951648
ENSMUSG00000002221	PAXIP1	1962.25	0.0302965	0.158503	0.191142	0.848414	0.948988
ENSMUSG00000002222	RMND5A	5502.51	-0.346307	0.260844	-1.32764	0.184297	0.479998
ENSMUSG00000002227	MOV10	2585.06	0.0224504	0.227543	0.0986646	0.921405	0.974432
ENSMUSG00000002228	PPM1J	23.7748	-0.108828	0.603689	-0.180272	0.856939	0.951648
ENSMUSG00000002233	RHOC	26.3863	0.282787	0.630122	0.448782	0.653589	0.863288
ENSMUSG00000002240	PRR27	0	NA	NA	NA	NA	NA
ENSMUSG00000002249	TEAD3	20.0829	-1.12024	0.475641	-2.35523	0.0185114	0.118938
ENSMUSG00000002250	PPARD	1048.19	0.0371356	0.191752	0.193665	0.846438	0.948463
ENSMUSG00000002257	DEF6	8108.43	-0.260407	0.172669	-1.50813	0.131521	0.399006
ENSMUSG00000002265	PEG3	0.444141	-0.0858723	0.366254	-0.234461	0.814627	NA
ENSMUSG00000002266	ZIM1	0.0296678	0	0.282173	0	1	NA
ENSMUSG00000002274	METRN	1249.22	-0.15694	0.217097	-0.722902	0.46974	0.752537
ENSMUSG00000002279	LMF1	698.229	0.16776	0.201051	0.834416	0.404046	0.704827
ENSMUSG00000002280	NARFL	865.455	0.225948	0.175478	1.28761	0.197881	0.499232
ENSMUSG00000002289	ANGPTL4	558.668	-0.684276	0.280676	-2.43796	0.0147704	0.102127
ENSMUSG00000002297	DBF4	1323.06	0.0956259	0.296071	0.322983	0.746708	0.907916
ENSMUSG00000002307	DAXX	2629.85	-0.0182035	0.144738	-0.125769	0.899915	0.967009
ENSMUSG00000002308	CD320	565.559	0.324512	0.230365	1.40868	0.158929	0.442962
ENSMUSG00000002319	IPO4	2983.2	-0.11718	0.244782	-0.47871	0.632145	0.851883
ENSMUSG00000002320	TM9SF1	2073.75	0.0749676	0.0817467	0.917072	0.359105	0.669397
ENSMUSG00000002324	REC8	111.859	0.0902944	0.594472	0.15189	0.879274	0.959623
ENSMUSG00000002325	IRF9	2854.4	0.461676	0.268237	1.72115	0.0852238	0.310561
ENSMUSG00000002326	GMPR2	818.6	-0.254734	0.105595	-2.41236	0.0158496	0.107033
ENSMUSG00000002329	MDP1	1606.17	0.165688	0.1317	1.25807	0.208366	0.51279
ENSMUSG00000002332	DHRS1	1298.36	0.380771	0.185051	2.05765	0.0396236	0.194222
ENSMUSG00000002341	NCAN	0.0269766	0	0.282173	0	1	NA
ENSMUSG00000002342	TMEM161A	1017.83	-0.00169239	0.152273	-0.0111142	0.991132	0.998471
ENSMUSG00000002343	ARMC6	405.807	0.214674	0.204072	1.05195	0.292821	0.606613
ENSMUSG00000002345	BORCS8	1107.67	-0.88905	0.156516	-5.68025	1.34499e-08	1.38526e-06
ENSMUSG00000002346	SLC25A42	202.991	0.15919	0.24215	0.657404	0.510921	0.779572
ENSMUSG00000002365	SNX9	535.153	-0.429038	0.292753	-1.46553	0.142776	0.4195
ENSMUSG00000002372	RANBP3	3732.68	-0.0511968	0.133414	-0.383744	0.701168	0.888077
ENSMUSG00000002379	NDUFA11	1461.4	-0.381435	0.198781	-1.91887	0.0550003	0.238049
ENSMUSG00000002384	BMP8B	1.95794	-0.650378	0.666647	-0.975596	0.329265	NA
ENSMUSG00000002393	NR2F6	384.26	0.814048	0.258837	3.14502	0.00166075	0.0207143
ENSMUSG00000002395	USE1	3453.46	-0.0386566	0.210097	-0.183994	0.854018	0.95089
ENSMUSG00000002396	OCEL1	688.405	-0.149814	0.16613	-0.901789	0.367169	0.676664
ENSMUSG00000002409	DYRK1B	1006.67	-0.143333	0.269563	-0.531724	0.594917	0.832303
ENSMUSG00000002413	BRAF	1143.46	-0.0860285	0.261631	-0.328816	0.742295	0.90618
ENSMUSG00000002416	NDUFB2	982.006	-0.0651121	0.191669	-0.339711	0.734074	0.903426
ENSMUSG00000002428	HLTF	1855.45	-0.303191	0.209723	-1.44567	0.14827	0.427965
ENSMUSG00000002455	PRPF6	3657.25	0.0776215	0.0816597	0.950549	0.341833	0.653246
ENSMUSG00000002458	RGS19	2149.56	-0.272732	0.146453	-1.86225	0.0625681	0.258272
ENSMUSG00000002459	RGS20	0.300985	0.244764	0.282507	0.8664	NA	NA
ENSMUSG00000002475	ABHD3	1.31846	0.212931	0.639813	0.332802	0.739284	NA
ENSMUSG00000002477	SNRPD1	3286.03	-0.0405849	0.212931	-0.190601	0.848838	0.949224
ENSMUSG00000002486	TCHP	508.239	0.107104	0.174575	0.613511	0.539539	0.798835
ENSMUSG00000002489	TIAM1	3183.47	0.364358	0.164149	2.21968	0.0264408	0.149698
ENSMUSG00000002496	TSC2	3828.28	0.316871	0.145071	2.18425	0.0289439	0.158966
ENSMUSG00000002500	RPL3L	33.4791	-2.31799	0.508694	-4.55676	5.19498e-06	0.00021074
ENSMUSG00000002504	SLC9A3R2	18.2686	0.0454964	0.490066	0.0928372	0.926033	0.975473
ENSMUSG00000002524	PUF60	6583.48	-0.445535	0.145132	-3.06987	0.00214155	0.0252465
ENSMUSG00000002546	GOLGA2	2467.84	0.145573	0.123709	1.17674	0.239301	0.549016
ENSMUSG00000002550	UCK1	2287.34	-0.10651	0.133533	-0.797629	0.425086	0.72091
ENSMUSG00000002565	SCIN	4775.31	-1.05112	0.431268	-2.43726	0.0147988	0.102225
ENSMUSG00000002578	IKZF4	598.461	-0.125941	0.234507	-0.537046	0.591236	0.829737
ENSMUSG00000002580	MIEN1	1899.21	-0.154243	0.209084	-0.73771	0.460691	0.746816
ENSMUSG00000002588	PON1	0.0328834	0	0.282173	0	1	NA
ENSMUSG00000002602	AXL	694.212	-0.362879	0.206414	-1.75801	0.0787453	0.295496
ENSMUSG00000002603	TGFB1	9384.24	0.230544	0.231074	0.997704	0.318423	0.630522
ENSMUSG00000002608	CCDC97	2710.71	-0.251468	0.191021	-1.31644	0.188027	0.486172
ENSMUSG00000002617	ZFP40	209.218	-0.0171596	0.366586	-0.0468091	0.962665	0.988666
ENSMUSG00000002625	AKAP8L	1173.01	-0.196384	0.176018	-1.11571	0.264547	0.576487
ENSMUSG00000002633	SHH	0	NA	NA	NA	NA	NA
ENSMUSG00000002635	PDCD2L	669.974	0.180594	0.167934	1.07538	0.282203	0.596155
ENSMUSG00000002658	GTF2F1	3203.95	0.0429863	0.147374	0.291682	0.77053	0.917951
ENSMUSG00000002660	CLPP	1193.91	0.022945	0.181671	0.126299	0.899495	0.966836
ENSMUSG00000002661	ALKBH7	427.989	0.318783	0.223854	1.42407	0.154427	0.437632
ENSMUSG00000002664	PSPN	0.0395512	-0.0491284	0.282173	-0.174107	0.861781	NA
ENSMUSG00000002668	DENND1C	1134.95	-0.921913	0.325143	-2.8354	0.00457676	0.044417
ENSMUSG00000002679	MED6	410.035	0.0103457	0.208723	0.0495668	0.960468	0.988499
ENSMUSG00000002688	PRKD1	0.0490141	0	0.282173	0	1	NA
ENSMUSG00000002699	LCP2	15611.7	0.190987	0.176611	1.0814	0.279521	0.593038
ENSMUSG00000002718	CSE1L	4743.76	-0.224049	0.229087	-0.978012	0.328068	0.640378
ENSMUSG00000002728	NAA20	1175.69	-0.255976	0.144911	-1.76644	0.0773227	0.292834
ENSMUSG00000002731	PRKRA	609.646	0.45366	0.150603	3.0123	0.00259275	0.0288829
ENSMUSG00000002732	FKBP7	63.8341	0.167983	0.224257	0.749068	0.453816	0.742122
ENSMUSG00000002733	PLEKHA3	667.841	-0.181633	0.152991	-1.18721	0.235144	0.543611
ENSMUSG00000002741	YKT6	3164.34	-0.223515	0.120425	-1.85605	0.0634462	0.260942
ENSMUSG00000002748	BAZ1B	9234.06	0.013564	0.156683	0.0865701	0.931013	0.977217
ENSMUSG00000002763	PEX6	3909.63	0.141698	0.225767	0.627631	0.530246	0.792581
ENSMUSG00000002767	MRPL2	1453.79	-0.0748591	0.180924	-0.413759	0.67905	0.877201
ENSMUSG00000002768	MEA1	1555.37	0.0186381	0.21293	0.0875319	0.930249	0.977057
ENSMUSG00000002769	GNMT	4.32372	0.127788	0.644001	0.198429	0.84271	0.948016
ENSMUSG00000002771	GRIN2D	10.6175	0.368955	0.448552	0.822546	0.410766	0.710211
ENSMUSG00000002778	KDELR1	2642.88	0.0526554	0.167992	0.313439	0.753947	0.910272
ENSMUSG00000002781	TMEM143	443.515	0.472458	0.181278	2.60626	0.00915377	0.0735289
ENSMUSG00000002791	PDXK-PS	6.45076	-0.893712	0.574783	-1.55487	0.119977	0.377812
ENSMUSG00000002797	GGCT	194.293	-0.602773	0.201473	-2.99183	0.00277307	0.0304771
ENSMUSG00000002799	JAG2	181.276	-0.864769	0.22548	-3.83524	0.000125443	0.00288066
ENSMUSG00000002803	BTBD6	678.365	0.24109	0.192032	1.25547	0.209309	0.514009
ENSMUSG00000002804	NUDT14	717.939	-0.559871	0.202893	-2.75944	0.00579004	0.0526367
ENSMUSG00000002808	EPDR1	8.74855	-1.11045	0.635759	-1.74665	0.0806982	0.299956
ENSMUSG00000002812	FLII	7701.18	-0.210992	0.149428	-1.412	0.15795	0.441747
ENSMUSG00000002814	TOP3A	1373.31	0.351566	0.113322	3.10237	0.00191977	0.0231883
ENSMUSG00000002820	ATG4D	1128.22	-0.265446	0.208085	-1.27566	0.202076	0.504521
ENSMUSG00000002825	QTRT1	501.348	-0.346349	0.190611	-1.81705	0.0692098	0.275619
ENSMUSG00000002831	PLIN4	0.108847	0	0.282173	0	1	NA
ENSMUSG00000002833	HDGFRP2	3046.22	0.122681	0.109445	1.12094	0.262315	0.574389
ENSMUSG00000002835	CHAF1A	2605.13	0.0849117	0.28613	0.296759	0.76665	0.916549
ENSMUSG00000002844	ADPRH	3008.11	0.142877	0.178358	0.801072	0.42309	0.719726
ENSMUSG00000002845	TMEM39A	907.822	-0.315418	0.110524	-2.85384	0.00431943	0.0426882
ENSMUSG00000002846	TIMMDC1	857.897	-0.06312	0.138708	-0.455056	0.649069	0.861425
ENSMUSG00000002847	PLA1A	3.25572	0.595252	0.671541	0.886397	0.375403	0.68427
ENSMUSG00000002870	MCM2	11251.5	-0.200851	0.24754	-0.811389	0.417142	0.715339
ENSMUSG00000002871	TPRA1	914.637	-0.024338	0.150407	-0.161814	0.871452	0.956906
ENSMUSG00000002881	NAB1	1959.55	-0.172707	0.221584	-0.779421	0.435732	0.728054
ENSMUSG00000002885	ADGRE5	895.254	-1.18488	0.428153	-2.76743	0.00564999	0.0517352
ENSMUSG00000002897	IL17RA	7103.97	0.277701	0.16292	1.70453	0.0882825	0.316544
ENSMUSG00000002900	LAMB1	13.3331	-0.0290725	0.654691	-0.0444064	0.96458	0.988783
ENSMUSG00000002908	KCNN1	1.7927	0.988871	0.67162	1.47237	0.140922	NA
ENSMUSG00000002910	ARRDC2	342.571	-0.122107	0.175799	-0.694582	0.487317	0.763236
ENSMUSG00000002930	PPP1R17	0	NA	NA	NA	NA	NA
ENSMUSG00000002944	CD36	2.65559	0.525914	0.666013	0.789645	0.429735	0.724226
ENSMUSG00000002948	MAP2K7	3890.76	0.131139	0.165626	0.791779	0.428489	0.723473
ENSMUSG00000002949	TIMM44	1819.25	-0.176043	0.0874303	-2.01352	0.0440598	0.207624
ENSMUSG00000002957	AP2A2	4750.05	0.177645	0.103447	1.71726	0.0859326	0.312337
ENSMUSG00000002963	PNKP	1563.83	0.0140068	0.213155	0.065712	0.947607	0.983695
ENSMUSG00000002968	MED25	2472.19	0.0762453	0.172967	0.440807	0.659353	0.866448
ENSMUSG00000002980	BCAM	121.799	0.674298	0.26824	2.51379	0.0119443	0.0882482
ENSMUSG00000002981	CLPTM1	4698.38	0.152554	0.168876	0.90335	0.36634	0.675788
ENSMUSG00000002983	RELB	955.211	0.745673	0.238635	3.12475	0.00177959	0.0219105
ENSMUSG00000002984	TOMM40	2478.15	-0.287146	0.196182	-1.46367	0.143285	0.420276
ENSMUSG00000002985	APOE	526.052	0.0787435	0.434105	0.181393	0.856059	0.951484
ENSMUSG00000002992	APOC2	0.245963	0.0422233	0.291077	0.145059	0.884664	NA
ENSMUSG00000002996	HBP1	2677.82	0.106331	0.180763	0.588236	0.556374	0.809135
ENSMUSG00000002997	PRKAR2B	1118.53	-0.461913	0.271337	-1.70236	0.0886882	0.317403
ENSMUSG00000003031	CDKN1B	2668.73	0.244057	0.1658	1.472	0.141022	0.415978
ENSMUSG00000003032	KLF4	32.3313	0.718289	0.393972	1.8232	0.0682736	0.273604
ENSMUSG00000003033	AP1M1	4440.69	0.0526174	0.15463	0.340279	0.733647	0.903273
ENSMUSG00000003037	RAB8A	5380.36	0.0738728	0.134795	0.548036	0.583667	0.824555
ENSMUSG00000003038	HMGN2	16668	-0.00152207	0.257946	-0.00590071	0.995292	0.999896
ENSMUSG00000003039	FAM32A	3487.92	-0.0604623	0.152432	-0.396651	0.691625	0.883669
ENSMUSG00000003051	ELF3	0.713707	0.0353801	0.434656	0.0813979	0.935125	NA
ENSMUSG00000003053	CYP2C29	0	NA	NA	NA	NA	NA
ENSMUSG00000003062	STARD3NL	567.022	-0.192961	0.174459	-1.10605	0.268704	0.580945
ENSMUSG00000003068	STK11	4105.44	-0.0840011	0.122882	-0.683592	0.494233	0.768608
ENSMUSG00000003070	EFNA2	5.48729	-0.409681	0.618988	-0.661857	0.508063	0.777622
ENSMUSG00000003072	ATP5D	5775.47	-0.168711	0.209817	-0.804091	0.421345	0.718676
ENSMUSG00000003099	PPP5C	4571.89	0.0964341	0.148238	0.650534	0.515347	0.782895
ENSMUSG00000003119	CDK12	3486.85	-0.00151465	0.141262	-0.0107223	0.991445	0.998586
ENSMUSG00000003123	LIPE	594.4	0.443343	0.19764	2.24319	0.0248848	0.144163
ENSMUSG00000003131	PAFAH1B2	3206.19	-0.071686	0.109695	-0.6535	0.513434	0.781233
ENSMUSG00000003134	TBC1D8	367.041	-0.165281	0.359399	-0.459882	0.645601	0.859535
ENSMUSG00000003135	CNOT11	2377.75	0.278077	0.100782	2.75918	0.00579467	0.052651
ENSMUSG00000003153	SLC2A3	2696.17	2.22701	0.21851	10.1918	2.15742e-24	5.31407e-21
ENSMUSG00000003154	FOXJ2	1405.23	0.826862	0.216899	3.8122	0.000137736	0.0030807
ENSMUSG00000003161	SRI	2961.54	-0.164239	0.140795	-1.16652	0.243406	0.554699
ENSMUSG00000003166	DGCR2	4170.27	0.130855	0.121974	1.07281	0.283358	0.59704
ENSMUSG00000003184	IRF3	2656.75	-0.12552	0.137493	-0.912917	0.361286	0.670782
ENSMUSG00000003190	BCL2L12	979.117	0.101213	0.166294	0.60864	0.542763	0.80092
ENSMUSG00000003198	ZFP959	286.733	-0.0270271	0.29815	-0.0906493	0.927771	0.975646
ENSMUSG00000003199	MPND	2209.28	0.570846	0.173741	3.28562	0.00101758	0.0141949
ENSMUSG00000003200	SH3GL1	2745.68	0.126757	0.131616	0.963088	0.335503	0.64765
ENSMUSG00000003206	EBI3	4.91953	1.25534	0.602284	2.0843	0.0371329	0.185972
ENSMUSG00000003208	CCDC94	713.035	0.00304546	0.165355	0.0184177	0.985306	0.995668
ENSMUSG00000003226	RANBP2	8615.61	-0.316937	0.280413	-1.13025	0.258371	0.569522
ENSMUSG00000003227	EDAR	3.95789	0.264767	0.665013	0.398137	0.690529	0.883055
ENSMUSG00000003228	GRK5	287.279	2.1392	0.209899	10.1916	2.1627e-24	5.31407e-21
ENSMUSG00000003233	DVL3	1007.33	0.368793	0.177238	2.08078	0.0374541	0.187161
ENSMUSG00000003234	ABCF3	1905.98	-0.17818	0.131796	-1.35193	0.176396	0.468574
ENSMUSG00000003235	EIF2B5	3152.21	-0.118891	0.148042	-0.803086	0.421925	0.719167
ENSMUSG00000003269	CYTH2	2073.55	0.160321	0.167896	0.954885	0.339636	0.652053
ENSMUSG00000003271	SULT2B1	96.3456	-1.16035	0.290407	-3.9956	6.45304e-05	0.00172081
ENSMUSG00000003273	CAR11	13.41	2.45613	0.547775	4.48383	7.33161e-06	0.000282744
ENSMUSG00000003279	DLGAP1	0.123402	0.0395501	0.282173	0.140163	0.888532	NA
ENSMUSG00000003282	PLAG1	24.0275	0.734486	0.44408	1.65395	0.0981374	0.337121
ENSMUSG00000003283	HCK	31.8584	0.00595224	0.447934	0.0132882	0.989398	0.997576
ENSMUSG00000003299	MRPL4	1889.31	-0.169625	0.189796	-0.893725	0.371469	0.681159
ENSMUSG00000003308	KEAP1	3216.4	-0.0561166	0.122761	-0.457121	0.647584	0.860776
ENSMUSG00000003309	AP1M2	19.4689	-0.674242	0.469461	-1.43621	0.150944	0.432346
ENSMUSG00000003316	GLG1	5886.94	0.451679	0.127979	3.52931	0.000416645	0.00716629
ENSMUSG00000003341	ATP8B3	3.3698	-0.498175	0.65184	-0.764259	0.444713	0.735084
ENSMUSG00000003344	BTBD2	2748.59	0.0841719	0.193589	0.434798	0.663709	0.868452
ENSMUSG00000003345	CSNK1G2	8364.16	-0.175585	0.16448	-1.06752	0.285739	0.600041
ENSMUSG00000003346	ABHD17A	2526.83	-0.376928	0.219612	-1.71634	0.0860998	0.312496
ENSMUSG00000003348	MOB3A	9162.3	0.261558	0.254303	1.02853	0.3037	0.617993
ENSMUSG00000003352	CACNB3	121.173	-0.535141	0.46294	-1.15596	NA	NA
ENSMUSG00000003354	CCDC65	0.461811	0	0.332923	0	1	NA
ENSMUSG00000003355	FKBP11	15.9759	-0.844637	0.468031	-1.80466	0.071128	0.279315
ENSMUSG00000003360	DDX23	4669.15	-0.0862922	0.100894	-0.855272	0.392401	0.696814
ENSMUSG00000003363	PLD3	8409.55	0.183461	0.313879	0.584497	0.558886	0.809358
ENSMUSG00000003378	GRIK5	289.923	0.317403	0.384634	0.82521	0.409253	0.708877
ENSMUSG00000003379	CD79A	4.99852	-1.12111	0.666233	-1.68276	NA	NA
ENSMUSG00000003380	RABAC1	2290.88	0.636621	0.213113	2.98725	0.002815	0.0308764
ENSMUSG00000003382	ETV3	4369.86	0.678984	0.218046	3.11395	0.00184602	0.0225029
ENSMUSG00000003402	PRKCSH	5086.64	0.193425	0.177463	1.08995	0.275736	0.588565
ENSMUSG00000003410	ELAVL3	4.31589	-1.13182	0.65094	-1.73874	0.0820808	0.303255
ENSMUSG00000003411	RAB3B	1.22737	0.268233	0.642246	0.417648	0.676204	NA
ENSMUSG00000003418	ST8SIA6	31.6434	0.539607	0.588462	0.916977	0.359154	0.669397
ENSMUSG00000003420	FCGRT	21.437	-0.186109	0.500071	-0.372164	0.70977	0.892924
ENSMUSG00000003421	NOSIP	2329.28	0.389223	0.177083	2.19797	0.0279515	0.155588
ENSMUSG00000003423	PIH1D1	1373.05	0.0778788	0.169577	0.459254	0.646052	0.85967
ENSMUSG00000003429	RPS11	42833.8	-0.33873	0.157655	-2.14855	0.0316705	0.168543
ENSMUSG00000003435	SUPT5	9238.5	0.0102999	0.132909	0.077496	0.938229	0.979457
ENSMUSG00000003436	DLL3	0.401644	-0.21623	0.415895	-0.519916	0.603122	NA
ENSMUSG00000003437	PAF1	2324.45	-0.0412551	0.123693	-0.333528	0.738736	0.904816
ENSMUSG00000003438	TIMM50	1878.35	-0.0619722	0.204262	-0.303395	0.761589	0.913429
ENSMUSG00000003444	MED29	646.334	-0.45687	0.197934	-2.3082	0.020988	0.129114
ENSMUSG00000003452	BICD1	76.6517	1.43066	0.493884	2.89676	0.00377035	0.0384182
ENSMUSG00000003458	NCSTN	3406.62	-0.0140703	0.162486	-0.086594	0.930994	0.977217
ENSMUSG00000003464	PEX19	2054.33	-0.0456591	0.118726	-0.384576	0.700552	0.887842
ENSMUSG00000003469	PHYHIP	1.09154	-0.255878	0.651055	-0.39302	0.694305	NA
ENSMUSG00000003476	CRHR2	0	NA	NA	NA	NA	NA
ENSMUSG00000003477	INMT	4.76422	0.268891	0.655265	0.410354	0.681546	0.878564
ENSMUSG00000003484	CYP4F18	1.89032	0.428586	0.663319	0.646123	0.518199	NA
ENSMUSG00000003500	IMPDH1	6382.61	-0.340258	0.175257	-1.94148	0.0522003	0.230761
ENSMUSG00000003505	PSG18	0	NA	NA	NA	NA	NA
ENSMUSG00000003518	DUSP3	8.86288	0.112486	0.523883	0.214717	0.829988	0.943849
ENSMUSG00000003526	PRODH	513.189	-0.551796	0.396897	-1.39027	0.164446	0.450177
ENSMUSG00000003527	DGCR14	1385.02	0.0163837	0.185876	0.0881429	0.929763	0.976785
ENSMUSG00000003528	SLC25A1	1912.12	-0.170817	0.181334	-0.942005	0.34619	0.656568
ENSMUSG00000003531	DGCR6	1119.37	-0.272704	0.224498	-1.21473	0.22447	0.532364
ENSMUSG00000003534	DDR1	9.1929	-1.35887	0.571032	-2.37967	0.0173283	0.114238
ENSMUSG00000003541	IER3	66.0561	-0.474123	0.439484	-1.07882	0.280668	0.594393
ENSMUSG00000003545	FOSB	199.414	-0.487196	0.268153	-1.81686	0.0692391	0.275619
ENSMUSG00000003546	KLC4	826.531	0.609332	0.219179	2.78007	0.00543479	0.0501763
ENSMUSG00000003549	ERCC1	742.083	0.068837	0.20485	0.336036	0.736844	0.904234
ENSMUSG00000003555	CYP17A1	0	NA	NA	NA	NA	NA
ENSMUSG00000003559	AS3MT	755.357	-0.0626962	0.289943	-0.216236	0.828804	0.943256
ENSMUSG00000003573	HOMER3	1243.07	-0.226012	0.149453	-1.51227	0.130466	0.39689
ENSMUSG00000003575	CRTC1	2939.67	0.449109	0.18649	2.40822	0.0160304	0.107915
ENSMUSG00000003581	RNF215	450.275	0.36014	0.221029	1.62938	0.103233	0.346257
ENSMUSG00000003585	SEC14L2	28.0233	0.471058	0.363874	1.29456	0.195471	0.495739
ENSMUSG00000003604	AVEN	707.922	0.245547	0.0999068	2.45776	0.0139807	0.098512
ENSMUSG00000003617	CP	1.57938	0.272262	0.645341	0.421888	0.673107	NA
ENSMUSG00000003623	CROT	1503.74	0.052749	0.228999	0.230347	0.817823	0.937595
ENSMUSG00000003644	RPS6KA1	6382.21	0.230285	0.272256	0.845842	0.397641	0.700092
ENSMUSG00000003657	CALB2	0	NA	NA	NA	NA	NA
ENSMUSG00000003660	SNRNP200	13041.6	-0.0231096	0.0983586	-0.234952	0.814246	0.936365
ENSMUSG00000003662	CIAO1	1770.27	0.0169167	0.122723	0.137845	0.890363	0.962866
ENSMUSG00000003665	HAS1	0.0563155	0	0.282173	0	1	NA
ENSMUSG00000003680	TAF6L	1460.29	-0.0839964	0.132727	-0.632853	0.52683	0.790385
ENSMUSG00000003721	INSIG2	504.592	0.00809803	0.140568	0.0576094	0.95406	0.985694
ENSMUSG00000003731	KPNA6	3311.14	-0.0321923	0.0951753	-0.338242	0.735181	0.903426
ENSMUSG00000003746	MAN1A	3010.53	0.0568278	0.237484	0.239291	0.81088	0.935097
ENSMUSG00000003752	ITPKC	520.919	0.0222567	0.186839	0.119122	0.905179	0.96831
ENSMUSG00000003762	COQ8B	600.753	0.184566	0.207992	0.887369	0.374881	0.684111
ENSMUSG00000003778	BRD8	2481.28	0.00652591	0.138158	0.0472352	0.962326	0.988592
ENSMUSG00000003779	KIF20A	1994.27	0.17066	0.358497	0.476043	0.634044	0.853191
ENSMUSG00000003808	FARSA	2525.06	-0.271273	0.144476	-1.87763	0.0604322	0.252596
ENSMUSG00000003809	GCDH	668.649	-0.452388	0.152248	-2.97138	0.00296461	0.0319895
ENSMUSG00000003810	MAST2	2355.99	0.284336	0.200592	1.41749	0.156341	0.439318
ENSMUSG00000003812	DNASE2A	466.555	0.249012	0.135945	1.83171	0.0669952	0.269927
ENSMUSG00000003813	RAD23A	2662.43	-0.290162	0.135896	-2.13517	0.0327468	0.171826
ENSMUSG00000003814	CALR	23907.3	-0.13647	0.151682	-0.899708	0.368276	0.67776
ENSMUSG00000003824	SYCE2	1407.84	-0.221166	0.319323	-0.692607	0.488556	0.764223
ENSMUSG00000003847	NFAT5	2226.07	-0.17198	0.294629	-0.583719	0.55941	0.809404
ENSMUSG00000003848	NOB1	2600.07	-0.0406846	0.158442	-0.25678	0.797349	0.929341
ENSMUSG00000003849	NQO1	50.5194	-0.404861	0.44242	-0.915105	0.360136	0.670028
ENSMUSG00000003863	PPFIA3	2.27986	0.255932	0.666683	0.383889	0.701061	0.888007
ENSMUSG00000003865	GYS1	1113.58	-0.0373483	0.186528	-0.200229	0.841301	0.947325
ENSMUSG00000003868	RUVBL2	3893.99	0.033447	0.171641	0.194866	0.845498	0.948463
ENSMUSG00000003872	LIN7B	1.2097	0.572514	0.593608	0.964465	0.334813	NA
ENSMUSG00000003873	BAX	1938.38	0.0302168	0.163307	0.185031	0.853205	0.950614
ENSMUSG00000003882	IL7R	5378.02	-0.362479	0.245467	-1.47669	0.139758	0.413528
ENSMUSG00000003923	TFAM	2105.16	-0.195709	0.160979	-1.21574	0.224083	0.532329
ENSMUSG00000003929	ZFP81	910.055	-0.211223	0.260483	-0.810887	0.417431	0.715444
ENSMUSG00000003934	EFNB3	38.6282	-0.0952448	0.287554	-0.331224	0.740475	0.905458
ENSMUSG00000003948	MMD	2005.7	0.526463	0.22986	2.29037	0.0219999	0.133239
ENSMUSG00000003949	HLF	11.0315	0.985421	0.517791	1.90312	0.0570243	0.2435
ENSMUSG00000003955	FAM162A	1058.98	-0.304066	0.202434	-1.50205	0.133085	0.402012
ENSMUSG00000003970	RPL8	49856.4	-0.63171	0.181855	-3.4737	0.000513335	0.00838495
ENSMUSG00000003974	GRM3	0	NA	NA	NA	NA	NA
ENSMUSG00000003992	SSBP2	1573.62	-0.172263	0.207159	-0.831547	0.405665	0.705627
ENSMUSG00000004018	FANCL	359.576	-0.422827	0.217778	-1.94155	0.052192	0.230761
ENSMUSG00000004031	BRINP2	0	NA	NA	NA	NA	NA
ENSMUSG00000004032	GSTM5	1.254	0.0619093	0.654146	0.0946414	0.9246	NA
ENSMUSG00000004035	GSTM7	49.6388	0.777784	0.541695	1.43583	0.151049	0.432576
ENSMUSG00000004038	GSTM3	0	NA	NA	NA	NA	NA
ENSMUSG00000004040	STAT3	9957.35	0.0120223	0.179698	0.0669029	0.946659	0.983262
ENSMUSG00000004043	STAT5A	8862.19	-0.314758	0.137998	-2.28089	0.0225547	0.135407
ENSMUSG00000004044	PTRF	15.1409	1.23997	0.519087	2.38874	0.0169061	0.112056
ENSMUSG00000004054	MAP3K11	3680.91	0.0534245	0.203142	0.262991	0.792557	0.927661
ENSMUSG00000004056	AKT2	7608.04	-0.156752	0.184153	-0.851203	0.394656	0.698435
ENSMUSG00000004069	DNAJA3	1961.51	-0.0210947	0.106395	-0.198269	0.842835	0.948016
ENSMUSG00000004070	HMOX2	3069.7	-0.16444	0.136582	-1.20397	0.228601	0.537233
ENSMUSG00000004071	CDIP1	1559.17	-0.269381	0.141442	-1.90454	0.0568402	0.242955
ENSMUSG00000004085	MAP3K20	203.105	0.269896	0.442564	0.609847	0.541963	0.800154
ENSMUSG00000004096	CWC15	2687.91	-0.226057	0.142314	-1.58844	0.112186	0.363186
ENSMUSG00000004098	COL5A3	0.270685	0.0838894	0.282173	0.297297	0.766239	NA
ENSMUSG00000004099	DNMT1	18055.5	0.134134	0.207788	0.645531	0.518583	0.785109
ENSMUSG00000004100	PPAN	2438.67	-0.182597	0.235441	-0.775553	0.438013	0.729919
ENSMUSG00000004105	ANGPTL2	3097.85	-0.0608889	0.230657	-0.26398	0.791795	0.927086
ENSMUSG00000004110	CACNA1E	12.0782	-3.68922	0.645412	-5.71608	NA	NA
ENSMUSG00000004113	CACNA1B	0.624086	-0.37717	0.438179	-0.860769	0.389365	NA
ENSMUSG00000004127	TRMT10A	383.977	-0.293378	0.202449	-1.44914	0.147297	0.426302
ENSMUSG00000004151	ETV1	36.2814	1.39839	0.545437	2.5638	0.0103532	0.0798546
ENSMUSG00000004187	KIFC2	117.114	0.693176	0.307889	2.25139	0.0243611	0.142376
ENSMUSG00000004207	PSAP	21537.8	0.389855	0.161471	2.41439	0.0157615	0.106689
ENSMUSG00000004221	IKBKG	1942.06	0.117008	0.141369	0.827678	0.407853	0.707307
ENSMUSG00000004231	PAX2	0.312127	0	0.282173	0	1	NA
ENSMUSG00000004233	WARS2	391.752	0.153264	0.153626	0.997648	0.31845	0.630522
ENSMUSG00000004263	ATN1	2336.61	0.348564	0.252954	1.37797	0.168212	0.455964
ENSMUSG00000004264	PHB2	7779.11	-0.167683	0.181122	-0.925804	0.354548	0.665063
ENSMUSG00000004266	PTPN6	11633.8	-0.19748	0.220552	-0.895388	0.37058	0.680398
ENSMUSG00000004267	ENO2	36.1271	1.887	0.450502	4.18866	2.806e-05	0.000864933
ENSMUSG00000004268	EMG1	4413.49	-0.479608	0.129441	-3.70522	0.000211207	0.00425382
ENSMUSG00000004270	LPCAT3	2088.59	0.0513778	0.17098	0.30049	0.763803	0.914862
ENSMUSG00000004285	ATP6V1F	3319.36	-0.00766401	0.186339	-0.0411295	0.967193	0.989378
ENSMUSG00000004296	IL12B	0.620598	-0.332982	0.435592	-0.764435	0.444608	NA
ENSMUSG00000004317	CLCN5	867.985	0.178695	0.244024	0.732286	0.463994	0.748865
ENSMUSG00000004319	CLCN3	2082.99	0.0230136	0.200863	0.114574	0.908783	0.969609
ENSMUSG00000004328	HIF3A	454.282	-0.499319	0.236853	-2.10814	0.0350187	0.179616
ENSMUSG00000004341	GPX6	0	NA	NA	NA	NA	NA
ENSMUSG00000004344	GPX5	0	NA	NA	NA	NA	NA
ENSMUSG00000004347	PDE1C	2.60116	0.174045	0.668742	0.260257	0.794666	0.928234
ENSMUSG00000004356	UTP20	3240.43	-0.221312	0.218663	-1.01211	0.311484	0.625733
ENSMUSG00000004359	SPIC	14.3784	0.759312	0.517898	1.46614	0.14261	0.419154
ENSMUSG00000004360	9330159F19RIK	0.0664731	0	0.282173	0	1	NA
ENSMUSG00000004364	CUL3	5216.9	-0.102308	0.227269	-0.450165	0.652591	0.862964
ENSMUSG00000004366	SST	0	NA	NA	NA	NA	NA
ENSMUSG00000004371	IL11	0.455085	0.402153	0.422634	0.95154	0.34133	NA
ENSMUSG00000004383	LARGE1	248.883	1.84913	0.311654	5.93327	2.96955e-09	3.81166e-07
ENSMUSG00000004393	DDX56	2077.73	-0.338332	0.169623	-1.99462	0.0460848	0.213367
ENSMUSG00000004394	TMED4	1605.25	0.41327	0.112554	3.67176	0.000240886	0.00473513
ENSMUSG00000004415	COL26A1	0.640894	-0.0559313	0.469776	-0.119059	0.905228	NA
ENSMUSG00000004446	BID	906.834	-0.134218	0.206866	-0.648818	0.516456	0.783491
ENSMUSG00000004451	RALB	961.639	-0.074558	0.201447	-0.370111	0.711299	0.893525
ENSMUSG00000004455	PPP1CC	10486.2	-0.195511	0.119736	-1.63284	0.102502	0.344988
ENSMUSG00000004460	DNAJB11	3052.09	-0.109136	0.102021	-1.06975	0.284732	0.599142
ENSMUSG00000004462	TBCCD1	589.809	0.290833	0.102699	2.83189	0.00462736	0.0447138
ENSMUSG00000004473	CLEC11A	190.218	0.00094139	0.354307	0.00265699	0.99788	1
ENSMUSG00000004500	ZFP324	719.91	0.074687	0.168192	0.444057	0.657001	0.86527
ENSMUSG00000004508	GAB2	556.484	0.349722	0.274381	1.27459	0.202456	0.504965
ENSMUSG00000004530	CORO1C	5802.67	-0.0699713	0.189395	-0.369447	0.711795	0.893525
ENSMUSG00000004535	TAX1BP1	6659.45	-0.147385	0.229868	-0.641171	0.521411	0.786885
ENSMUSG00000004540	PSG17	4.27687	0.278181	0.290835	0.956491	NA	NA
ENSMUSG00000004542	PSG19	0.0423077	0	0.282173	0	1	NA
ENSMUSG00000004552	CTSE	5949.34	-0.949435	0.660241	-1.43801	0.15043	0.43131
ENSMUSG00000004558	NDRG2	398.775	0.698314	0.332998	2.09705	0.0359892	0.182338
ENSMUSG00000004561	METTL17	876.794	0.137543	0.123512	1.1136	0.265452	0.577315
ENSMUSG00000004562	ARHGEF40	318.037	1.49401	0.347089	4.30441	1.67433e-05	0.000576867
ENSMUSG00000004565	PNPLA6	847.778	1.19536	0.181721	6.57804	4.76697e-11	1.09322e-08
ENSMUSG00000004567	MCOLN1	789.305	0.266512	0.187378	1.42232	0.154932	0.437863
ENSMUSG00000004568	ARHGEF18	3696.81	-0.106145	0.272358	-0.389726	0.696739	0.88586
ENSMUSG00000004591	PKN2	2238.6	-0.14401	0.210944	-0.682691	0.494802	0.7688
ENSMUSG00000004609	CD33	11.9252	-0.718222	0.463843	-1.54842	0.121522	0.380446
ENSMUSG00000004610	ETFB	2403.04	-0.334229	0.196007	-1.70519	0.0881588	0.316428
ENSMUSG00000004612	NKG7	6811	-0.253707	0.303683	-0.835436	0.403472	0.704254
ENSMUSG00000004613	LIM2	0	NA	NA	NA	NA	NA
ENSMUSG00000004626	STXBP2	3967.87	-0.16631	0.180655	-0.920592	0.357263	0.667855
ENSMUSG00000004630	PCP2	0.898594	-0.0277395	0.58142	-0.0477099	0.961947	NA
ENSMUSG00000004631	SGCE	0.564162	-0.170939	0.509373	-0.335588	0.737181	NA
ENSMUSG00000004633	CHN2	1124.01	1.84077	0.565263	3.25648	0.00112802	0.015252
ENSMUSG00000004637	WWOX	746.038	0.029378	0.237551	0.12367	0.901576	0.967136
ENSMUSG00000004642	SLBP	4314.53	-0.0393122	0.239345	-0.164249	0.869535	0.956061
ENSMUSG00000004651	TYR	0	NA	NA	NA	NA	NA
ENSMUSG00000004654	GHRHR	0	NA	NA	NA	NA	NA
ENSMUSG00000004655	AQP1	2.4647	0.948025	0.671795	1.41118	0.158191	0.441812
ENSMUSG00000004661	ARID3B	665.615	0.314945	0.20274	1.55344	0.120318	0.37859
ENSMUSG00000004665	CNN2	11031.2	-0.862778	0.292374	-2.95094	0.00316808	0.0336572
ENSMUSG00000004667	POLR2E	2312.41	-0.177641	0.169689	-1.04687	0.295161	0.608986
ENSMUSG00000004668	ABCA13	0.433722	0.118076	0.46776	0.252429	0.800709	NA
ENSMUSG00000004677	MYO9B	7281.14	0.0646866	0.139522	0.463632	0.642912	0.858009
ENSMUSG00000004698	HDAC9	308.246	-1.87757	0.472829	-3.97093	7.15915e-05	0.00186289
ENSMUSG00000004707	LY9	2772.11	0.186799	0.25367	0.736385	0.461496	0.747062
ENSMUSG00000004709	CD244	93.9218	-1.65799	0.573822	-2.88939	0.00385994	0.0390535
ENSMUSG00000004730	ADGRE1	38.5329	0.395613	0.403136	0.981339	0.326426	0.639484
ENSMUSG00000004748	MTFP1	166.367	0.703643	0.252897	2.78233	0.00539702	0.0499348
ENSMUSG00000004768	RAB23	91.3483	0.449103	0.236702	1.89734	0.0577834	0.245523
ENSMUSG00000004771	RAB11A	1558.65	-0.0244025	0.137997	-0.176833	0.85964	0.952387
ENSMUSG00000004788	EIF2B2	2780.61	0.118957	0.194688	0.611013	0.541191	0.799832
ENSMUSG00000004789	DLST	4270.74	0.0265863	0.130711	0.203398	0.838824	0.946518
ENSMUSG00000004791	PGF	10.1257	-0.318682	0.621067	-0.513121	0.607867	0.839766
ENSMUSG00000004798	ULK2	1687.61	-0.0537543	0.209829	-0.256182	0.79781	0.929394
ENSMUSG00000004814	CCL24	0.580413	-0.166639	0.283435	-0.587927	0.556581	NA
ENSMUSG00000004815	DGKQ	530.438	-0.016587	0.163581	-0.101399	0.919234	0.973513
ENSMUSG00000004821	TMED11	0	NA	NA	NA	NA	NA
ENSMUSG00000004837	GRAP	2355.2	0.120336	0.238698	0.504134	0.614168	0.842431
ENSMUSG00000004842	POU1F1	0.0841244	-0.0491284	0.282173	-0.174107	0.861781	NA
ENSMUSG00000004843	CHMP2B	1372.73	0.325773	0.180333	1.8065	0.0708399	0.278566
ENSMUSG00000004846	PLOD3	850.489	0.53879	0.248105	2.17162	0.0298843	0.162416
ENSMUSG00000004849	AP1S1	1897.05	-0.214646	0.158218	-1.35665	0.174894	0.466341
ENSMUSG00000004864	MAPK13	1.30665	0.484232	0.645112	0.750617	0.452883	NA
ENSMUSG00000004865	SRPK1	5366.15	-0.218063	0.153086	-1.42445	0.154316	0.437632
ENSMUSG00000004872	PAX3	0.0296105	0.0395501	0.282173	0.140163	0.888532	NA
ENSMUSG00000004880	LBR	10578.3	0.106313	0.171024	0.621627	0.534187	0.794936
ENSMUSG00000004885	CRABP2	1.70036	0.170107	0.667537	0.254827	0.798856	NA
ENSMUSG00000004891	NES	19.2661	1.22081	0.548152	2.22714	0.0259376	0.14792
ENSMUSG00000004892	BCAN	0.499239	-0.185567	0.334442	-0.554855	0.578994	NA
ENSMUSG00000004894	HAPLN2	0.0563155	0	0.282173	0	1	NA
ENSMUSG00000004895	PRCC	2914.65	0.340537	0.169479	2.00932	0.0445035	0.208743
ENSMUSG00000004896	RRNAD1	668.024	0.0893327	0.142617	0.626381	0.531065	0.79308
ENSMUSG00000004897	HDGF	12339.7	-0.0535181	0.168322	-0.31795	0.750523	0.908954
ENSMUSG00000004902	SLC25A18	0.0619156	0.0838894	0.282173	0.297297	0.766239	NA
ENSMUSG00000004929	THOP1	1242.15	-0.357132	0.252023	-1.41706	0.156465	0.439451
ENSMUSG00000004931	APBA3	903.988	-0.0845486	0.233746	-0.361712	0.717567	0.895722
ENSMUSG00000004933	MATK	774.308	0.413684	0.296879	1.39344	0.163486	0.448837
ENSMUSG00000004934	PIAS4	1271.25	0.0657412	0.160502	0.409597	0.682101	0.878703
ENSMUSG00000004936	MAP2K1	1953.31	0.198161	0.110054	1.80058	0.0717694	0.280154
ENSMUSG00000004937	SGTA	2745.08	-0.0297852	0.180913	-0.164638	0.869229	0.955881
ENSMUSG00000004939	NMRK2	0.0264254	0	0.282173	0	1	NA
ENSMUSG00000004945	TMEM242	3320.32	0.118565	0.204942	0.578526	0.562909	0.811315
ENSMUSG00000004947	DTX2	1309.21	0.461424	0.212155	2.17494	0.0296347	0.161507
ENSMUSG00000004948	ZP3	0.0849964	0.0395501	0.282173	0.140163	0.888532	NA
ENSMUSG00000004951	HSPB1	0.246034	-0.0491284	0.282173	-0.174107	0.861781	NA
ENSMUSG00000004952	RASA4	1220.88	-0.358846	0.46873	-0.765571	0.443931	0.734406
ENSMUSG00000004961	SYT5	8.87221	0.857476	0.61574	1.39259	0.163743	0.448968
ENSMUSG00000004980	HNRNPA2B1	27425.8	-0.0140373	0.20503	-0.0684646	0.945416	0.982755
ENSMUSG00000004988	FXYD4	1.42994	0.386084	0.503357	0.767018	0.443071	NA
ENSMUSG00000004994	CCDC130	434.669	0.216388	0.169155	1.27923	0.200817	0.502777
ENSMUSG00000004996	MRI1	1511.61	-0.456131	0.184175	-2.47662	0.0132632	0.0951323
ENSMUSG00000005034	PRKACB	8737.42	-0.0418673	0.189306	-0.221162	0.824967	0.940881
ENSMUSG00000005043	SGSH	1534.16	0.109753	0.34087	0.321978	0.747469	0.908001
ENSMUSG00000005045	CHD5	6.66482	1.67789	0.627698	2.67308	0.00751587	0.0638506
ENSMUSG00000005054	CSTB	1246.2	-0.32603	0.187359	-1.74013	0.0818358	0.302698
ENSMUSG00000005057	SH2B2	130.436	-0.195355	0.417956	-0.467406	0.64021	0.856468
ENSMUSG00000005069	PEX5	2290.93	0.284056	0.164538	1.72638	0.0842785	0.308415
ENSMUSG00000005078	JKAMP	570.743	0.156886	0.18448	0.850422	0.39509	0.698718
ENSMUSG00000005087	CD44	199.262	-0.368195	0.467948	-0.78683	0.431382	0.725445
ENSMUSG00000005089	SLC1A2	0.390909	-0.0792845	0.361852	-0.219107	0.826566	NA
ENSMUSG00000005102	EIF2AK4	851.774	0.00341438	0.12284	0.0277954	0.977825	0.993567
ENSMUSG00000005103	WDR1	12093.3	-0.642183	0.162627	-3.94882	7.85372e-05	0.00200124
ENSMUSG00000005107	SLC2A9	620.304	-0.0722269	0.2174	-0.332231	0.739715	0.90513
ENSMUSG00000005124	WISP1	0.0541748	0	0.282173	0	1	NA
ENSMUSG00000005125	NDRG1	5440.95	0.470693	0.344945	1.36455	0.172396	0.462015
ENSMUSG00000005131	4930550C14RIK	8.10886	0.0675122	0.630007	0.107161	0.914661	0.971505
ENSMUSG00000005142	MAN2B1	4938.84	-0.182579	0.175546	-1.04007	0.298309	0.612134
ENSMUSG00000005148	KLF5	1.82585	0.780603	0.662145	1.1789	0.238438	NA
ENSMUSG00000005150	WDR83	746.572	-0.115006	0.0928187	-1.23904	0.21533	0.522379
ENSMUSG00000005161	PRDX2	8513.27	-0.0812441	0.196838	-0.412747	0.679792	0.877941
ENSMUSG00000005198	POLR2A	20458.9	0.499924	0.128006	3.90546	9.40449e-05	0.00229118
ENSMUSG00000005202	SHBG	0	NA	NA	NA	NA	NA
ENSMUSG00000005204	SENP3	3983.66	0.072112	0.123243	0.585119	0.558467	0.809317
ENSMUSG00000005220	CORIN	0.111665	0	0.282173	0	1	NA
ENSMUSG00000005225	PLEKHA8	49.0791	2.46308	0.596393	4.12996	3.62832e-05	0.00106315
ENSMUSG00000005232	G6PC2	0.024507	0	0.282173	0	1	NA
ENSMUSG00000005233	SPC25	772.529	0.16519	0.411704	0.401236	0.688246	0.88212
ENSMUSG00000005237	DNAH2	1.2151	-0.897587	0.570783	-1.57256	0.115822	NA
ENSMUSG00000005251	RIPK4	4.28111	1.16636	0.615266	1.89571	0.057999	0.245983
ENSMUSG00000005262	UFD1L	1623.67	0.0191045	0.0814284	0.234617	0.814506	0.936418
ENSMUSG00000005267	ZFP287	181.086	-0.76789	0.223813	-3.43094	0.000601494	0.00946659
ENSMUSG00000005268	PRLR	1.23918	0.60913	0.635007	0.959248	0.337434	NA
ENSMUSG00000005299	LETM1	3611.75	0.383293	0.103465	3.70457	0.000211753	0.00425982
ENSMUSG00000005312	UBQLN1	4788.25	-0.126448	0.0918468	-1.37673	0.168595	0.456524
ENSMUSG00000005320	FGFR4	0.275618	0.140785	0.294875	0.477438	0.63305	NA
ENSMUSG00000005338	CADM3	0.199401	0.0838894	0.282173	0.297297	0.766239	NA
ENSMUSG00000005339	FCER1A	0.829273	0.525771	0.285259	1.84314	NA	NA
ENSMUSG00000005354	TXN2	3799.81	-0.5919	0.153788	-3.84879	0.000118702	0.00276649
ENSMUSG00000005355	CASP14	0	NA	NA	NA	NA	NA
ENSMUSG00000005357	SLC1A6	0.158866	0	0.282173	0	1	NA
ENSMUSG00000005360	SLC1A3	5.78259	-0.0649002	0.574777	-0.112914	0.910099	0.970066
ENSMUSG00000005362	CRBN	2270.11	-0.321332	0.190489	-1.68688	0.0916265	0.32341
ENSMUSG00000005364	IL5RA	5.69119	-0.474421	0.670841	-0.707203	0.47944	0.758284
ENSMUSG00000005370	MSH6	6451.07	-0.08075	0.157569	-0.512475	0.608318	0.840003
ENSMUSG00000005371	FBXO11	1779.03	0.0657784	0.243004	0.270689	0.78663	0.924516
ENSMUSG00000005373	MLXIPL	1.73743	0.645634	0.636976	1.01359	0.310778	NA
ENSMUSG00000005374	TBL2	1627.45	0.130527	0.134714	0.968925	0.332583	0.644713
ENSMUSG00000005378	WBSCR22	1708.94	-0.0863228	0.1465	-0.589233	0.555705	0.808709
ENSMUSG00000005397	NID1	1.98503	-1.13295	0.455526	-2.48712	NA	NA
ENSMUSG00000005410	MCM5	10757.4	-0.0401321	0.290125	-0.138327	0.889982	0.962866
ENSMUSG00000005413	HMOX1	51.598	0.58334	0.300585	1.94069	0.0522964	0.230996
ENSMUSG00000005417	MPRIP	7707.64	-0.452343	0.11977	-3.77676	0.00015888	0.00344173
ENSMUSG00000005442	CIC	8391.38	0.428108	0.236471	1.8104	0.0702334	0.277577
ENSMUSG00000005447	PAFAH1B3	1385.84	-0.257162	0.184212	-1.39601	0.16271	0.447636
ENSMUSG00000005465	IL27RA	3272.62	-0.356882	0.176845	-2.01805	0.0435859	0.206125
ENSMUSG00000005469	PRKACA	2898.25	-0.25662	0.154542	-1.66052	0.0968106	0.334667
ENSMUSG00000005470	ASF1B	1613.51	-0.0401724	0.33436	-0.120147	0.904367	0.968157
ENSMUSG00000005474	MYL10	5905.84	-1.34228	0.402889	-3.33164	0.000863356	0.0124803
ENSMUSG00000005481	DDX39	3339.83	-0.30964	0.162353	-1.9072	0.0564945	0.242019
ENSMUSG00000005483	DNAJB1	4444.05	0.326715	0.151833	2.15181	0.0314126	0.167794
ENSMUSG00000005493	MSH4	0.778565	-0.0278572	0.59995	-0.0464325	0.962966	NA
ENSMUSG00000005501	USP40	597.389	0.30675	0.264133	1.16135	0.245501	0.556444
ENSMUSG00000005503	EVX1	0.109706	0.0395501	0.282173	0.140163	0.888532	NA
ENSMUSG00000005505	KBTBD4	1319.5	0.302008	0.116376	2.59511	0.00945612	0.0750555
ENSMUSG00000005506	CELF1	6511.64	-0.00428554	0.164414	-0.0260655	0.979205	0.993701
ENSMUSG00000005510	NDUFS3	2344.64	-0.0984695	0.150279	-0.655245	0.51231	0.78053
ENSMUSG00000005514	POR	3738.8	-0.180823	0.22182	-0.815178	0.41497	0.713348
ENSMUSG00000005533	IGF1R	1703.71	-0.660373	0.374752	-1.76216	0.0780421	0.294563
ENSMUSG00000005534	INSR	1021.36	-0.287477	0.275183	-1.04468	0.296171	0.609925
ENSMUSG00000005540	FCER2A	0	NA	NA	NA	NA	NA
ENSMUSG00000005547	CYP2A5	0.282338	0	0.282173	0	1	NA
ENSMUSG00000005553	ATP4A	2.37173	0.558375	0.671464	0.831579	0.405647	0.705627
ENSMUSG00000005566	TRIM28	21519.8	0.100722	0.17172	0.586547	0.557508	0.809207
ENSMUSG00000005575	UBE2M	4801.58	0.13282	0.158497	0.837994	0.402034	0.703142
ENSMUSG00000005580	ADCY9	62.6723	-0.134744	0.476465	-0.282799	0.777331	0.92026
ENSMUSG00000005583	MEF2C	520.259	3.03939	0.632902	4.8023	NA	NA
ENSMUSG00000005609	CTR9	3669.75	-0.0586166	0.0849872	-0.689711	0.490376	0.76561
ENSMUSG00000005610	EIF4G2	42932.5	-0.194239	0.126455	-1.53603	0.124531	0.386142
ENSMUSG00000005611	MRVI1	49.9902	-0.411944	0.500309	-0.82338	0.410292	0.709891
ENSMUSG00000005615	PCYT1A	1357.29	0.186382	0.26677	0.698659	0.484765	0.761399
ENSMUSG00000005621	ZFP592	4122.03	0.253581	0.153641	1.65048	0.0988444	0.338872
ENSMUSG00000005625	PSMD4	4303.32	0.0214445	0.147068	0.145813	0.884069	0.961458
ENSMUSG00000005628	TMOD4	23.2587	0.151504	0.579254	0.26155	0.793668	0.928078
ENSMUSG00000005640	INSRR	0.566263	-0.522498	0.439556	-1.1887	0.23456	NA
ENSMUSG00000005649	CABP5	0.0289605	0	0.282173	0	1	NA
ENSMUSG00000005656	SNX6	2360.47	-0.101898	0.181584	-0.561159	0.574689	0.818897
ENSMUSG00000005667	MTHFD2	1999.15	-0.453545	0.183491	-2.47176	0.0134451	0.0960363
ENSMUSG00000005672	KIT	2134.61	0.129645	0.408074	0.317699	0.750713	0.908954
ENSMUSG00000005674	TOMM40L	1213.75	0.244692	0.1677	1.45911	0.144535	0.421731
ENSMUSG00000005677	NR1I3	7.6686	-0.177125	0.552075	-0.320836	0.748335	0.908139
ENSMUSG00000005681	APOA2	13.0172	1.22928	0.492379	2.4966	0.0125389	0.091424
ENSMUSG00000005682	PAN2	1687.84	0.171884	0.11798	1.45689	0.145147	0.422496
ENSMUSG00000005683	CS	9097.64	0.0201267	0.0891249	0.225826	0.821337	0.939192
ENSMUSG00000005686	AMPD3	139.516	-0.193007	0.361042	-0.534582	0.592939	0.831276
ENSMUSG00000005687	BCAS2	1891.49	-0.12289	0.129347	-0.950079	0.342072	0.653306
ENSMUSG00000005696	SH2D1A	2856.87	-0.21254	0.24407	-0.870816	0.383855	0.690669
ENSMUSG00000005698	CTCF	7605.25	-0.014927	0.136288	-0.109526	0.912786	0.971056
ENSMUSG00000005699	PARD6A	330.817	0.42733	0.209077	2.04389	0.0409642	0.198388
ENSMUSG00000005705	AGRP	11.4111	-0.984999	0.527718	-1.86653	0.0619679	0.256761
ENSMUSG00000005716	PVALB	0	NA	NA	NA	NA	NA
ENSMUSG00000005718	TFAP4	1522.67	-0.00691784	0.251499	-0.0275064	0.978056	0.993567
ENSMUSG00000005732	RANBP1	5634.3	-0.286947	0.240638	-1.19244	0.233088	0.542065
ENSMUSG00000005763	CD247	12591.6	-0.112021	0.209592	-0.53447	0.593016	0.831276
ENSMUSG00000005774	RFX5	1513.73	0.220989	0.110812	1.99427	0.0461223	0.213483
ENSMUSG00000005779	PSMB4	5337.32	-0.106209	0.182218	-0.582869	0.559982	0.809682
ENSMUSG00000005800	MMP8	0.264076	-0.00478913	0.282173	-0.0169723	0.986459	NA
ENSMUSG00000005802	SLC30A4	1821.05	-0.246467	0.275731	-0.893868	0.371393	0.681091
ENSMUSG00000005803	SQRDL	164.142	-0.593948	0.359762	-1.65094	0.0987501	0.338737
ENSMUSG00000005804	BLOC1S6	1284.11	0.0743985	0.106892	0.696013	0.486421	0.762874
ENSMUSG00000005813	METAP1	1650.36	-0.0377132	0.112607	-0.33491	0.737693	0.904816
ENSMUSG00000005823	GPR108	1350.27	0.437391	0.156849	2.78861	0.0052934	0.0493477
ENSMUSG00000005824	TNFSF14	388.2	0.5229	0.330141	1.58387	0.113224	0.365651
ENSMUSG00000005836	GATA6	0.293859	-0.0934676	0.282173	-0.331242	0.740462	NA
ENSMUSG00000005846	RSL1D1	5163.63	-0.302792	0.217397	-1.39281	0.163677	0.448862
ENSMUSG00000005864	CNGA2	0	NA	NA	NA	NA	NA
ENSMUSG00000005871	APC	2774.35	0.159188	0.232995	0.683222	0.494466	0.768693
ENSMUSG00000005873	REEP5	2653.47	-0.194785	0.210721	-0.924373	0.355292	0.665906
ENSMUSG00000005881	ERGIC3	3406.73	0.00275241	0.200542	0.0137249	0.989049	0.9974
ENSMUSG00000005882	UQCC1	1100.39	-0.132653	0.10317	-1.28578	0.198521	0.499874
ENSMUSG00000005883	SPO11	173.789	-1.71368	0.357316	-4.79599	1.61871e-06	8.16475e-05
ENSMUSG00000005886	NCOA2	5587.16	-0.540733	0.179296	-3.01586	0.00256248	0.0287162
ENSMUSG00000005891	PRL4A1	0	NA	NA	NA	NA	NA
ENSMUSG00000005892	TRH	0.0264254	0	0.282173	0	1	NA
ENSMUSG00000005893	NR2C2	4435.59	-0.1928	0.184403	-1.04554	0.295775	0.609766
ENSMUSG00000005897	NR2C1	498.037	-0.320372	0.149132	-2.14825	0.0316937	0.168562
ENSMUSG00000005899	SMPD4	2413.93	0.199546	0.171522	1.16338	0.244674	0.555701
ENSMUSG00000005907	PEX1	724.979	0.179216	0.103896	1.72496	0.084534	0.308767
ENSMUSG00000005917	OTX1	0.695438	0	0.313406	0	1	NA
ENSMUSG00000005936	KCTD20	4040.8	-0.300922	0.0879725	-3.42064	0.000624736	0.0097332
ENSMUSG00000005947	ITGAE	1337.17	1.97785	0.430796	4.59115	4.40807e-06	0.000186287
ENSMUSG00000005949	CTNS	568.658	0.606173	0.177805	3.4092	0.000651532	0.0100867
ENSMUSG00000005950	P2RX5	1.17174	0.314117	0.612116	0.513166	0.607835	NA
ENSMUSG00000005951	SHPK	230.841	1.08968	0.205201	5.31032	1.09433e-07	8.18615e-06
ENSMUSG00000005952	TRPV1	0.0863122	0	0.282173	0	1	NA
ENSMUSG00000005958	EPHB3	3.75818	1.65429	0.660978	2.5028	0.0123216	0.0902991
ENSMUSG00000005968	TUFT1	113.449	0.854919	0.301721	2.83347	0.00460449	0.044568
ENSMUSG00000005973	RCN1	1159.59	-0.296416	0.163565	-1.81222	0.0699516	0.277036
ENSMUSG00000005980	DNASE1	3.84495	-0.942587	0.627946	-1.50106	0.133339	0.402498
ENSMUSG00000005981	TRAP1	5732.11	-0.055366	0.138662	-0.399288	0.689681	0.882594
ENSMUSG00000005982	NAA60	3072.95	-0.275169	0.155003	-1.77524	0.0758576	0.289687
ENSMUSG00000005983	1700037C18RIK	98.3599	0.189634	0.23905	0.793279	0.427615	0.72299
ENSMUSG00000005986	ANKRD13D	308.661	0.0212849	0.188009	0.113212	0.909862	0.970038
ENSMUSG00000005994	TYRP1	0	NA	NA	NA	NA	NA
ENSMUSG00000006005	TPR	7919.87	-0.323201	0.198912	-1.62485	0.104195	0.348127
ENSMUSG00000006007	PDC	0	NA	NA	NA	NA	NA
ENSMUSG00000006010	BC003331	617.578	-0.0136216	0.210568	-0.0646898	0.948421	0.984024
ENSMUSG00000006014	PRG4	21.736	0.292393	0.670331	0.436191	0.662698	0.86816
ENSMUSG00000006019	DHX34	2211.78	0.67535	0.178625	3.78083	0.000156306	0.00339452
ENSMUSG00000006021	KPTN	655.716	0.332873	0.190026	1.75172	0.0798219	0.298205
ENSMUSG00000006024	NAPA	3613.18	-0.0908513	0.133168	-0.682234	0.495091	0.768909
ENSMUSG00000006050	SRA1	1908.63	-0.120329	0.135221	-0.88987	0.373536	0.682837
ENSMUSG00000006056	CALCOCO2	0.0423077	0	0.282173	0	1	NA
ENSMUSG00000006057	ATP5G1	2951.97	-0.486894	0.203205	-2.39608	0.0165715	0.110562
ENSMUSG00000006058	SNF8	1487.87	-0.197388	0.111483	-1.77056	0.0766336	0.291516
ENSMUSG00000006095	TBCB	1471.19	0.21957	0.176532	1.2438	0.213574	0.519585
ENSMUSG00000006127	INPP5K	2448.57	0.110705	0.179252	0.617597	0.536841	0.796213
ENSMUSG00000006134	CRKL	3606.26	0.146594	0.111041	1.32018	0.186775	0.48387
ENSMUSG00000006143	UPK3BL	0.780734	0.034974	0.308822	0.11325	0.909832	NA
ENSMUSG00000006154	EPS8L1	849.806	-0.161781	0.461965	-0.350202	0.726187	0.900534
ENSMUSG00000006169	CLINT1	6549.25	-0.300219	0.126654	-2.3704	0.0177689	0.116195
ENSMUSG00000006179	PRSS16	59.14	0.502523	0.403579	1.24517	0.21307	0.518947
ENSMUSG00000006191	CDKAL1	747.045	-0.0267522	0.105266	-0.254138	0.799389	0.930012
ENSMUSG00000006200	RHOX6	0	NA	NA	NA	NA	NA
ENSMUSG00000006204	5430419D17RIK	0	NA	NA	NA	NA	NA
ENSMUSG00000006205	HTRA1	1.43158	0.472333	0.646554	0.730539	0.465061	NA
ENSMUSG00000006215	ZBTB17	2027.58	0.205391	0.18766	1.09448	0.273743	0.586276
ENSMUSG00000006216	CLCNKB	0.0296105	0.0395501	0.282173	0.140163	0.888532	NA
ENSMUSG00000006218	FAM131C	0.101453	0.0838894	0.282173	0.297297	0.766239	NA
ENSMUSG00000006219	FBLIM1	7.23686	0.770026	0.591966	1.30079	0.193329	0.49307
ENSMUSG00000006221	HSPB7	1.38149	-0.508662	0.556156	-0.914605	0.360399	NA
ENSMUSG00000006235	EPOR	8.91231	-1.04506	0.597498	-1.74906	0.0802801	0.299263
ENSMUSG00000006241	CCDC159	0.783693	0.197087	0.587734	0.335333	0.737374	NA
ENSMUSG00000006262	MOB1B	684.856	-0.133094	0.298205	-0.446317	0.655368	0.864244
ENSMUSG00000006269	ATP6V1B1	0	NA	NA	NA	NA	NA
ENSMUSG00000006270	VAX1	0.0264254	0	0.282173	0	1	NA
ENSMUSG00000006273	ATP6V1B2	3142.01	-0.063433	0.132027	-0.480454	0.630905	0.85177
ENSMUSG00000006276	EPS15L1	3444.43	-0.19918	0.125486	-1.58726	0.112453	0.363845
ENSMUSG00000006281	TEP1	1245.56	0.0583514	0.188716	0.309202	0.757168	0.911574
ENSMUSG00000006288	TTC5	1680.31	-0.0421949	0.166452	-0.253496	0.799885	0.930098
ENSMUSG00000006289	OSGEP	2043.58	0.0523305	0.144008	0.363385	0.716317	0.895176
ENSMUSG00000006299	AAMP	6062.97	0.0803508	0.167777	0.478913	0.632	0.851883
ENSMUSG00000006301	TMBIM1	252.061	-0.147129	0.196019	-0.750582	0.452904	0.741288
ENSMUSG00000006304	ARPC2	12410	-0.279463	0.132467	-2.10969	0.0348852	0.179112
ENSMUSG00000006307	KMT2B	4793.61	0.194797	0.218901	0.889884	0.373528	0.682837
ENSMUSG00000006310	ZBTB32	1.10316	-0.137628	0.613447	-0.224351	0.822484	NA
ENSMUSG00000006311	ETV2	0.378938	-0.00476523	0.311021	-0.0153212	0.987776	NA
ENSMUSG00000006313	UPK1A	9.29636	-0.259403	0.5746	-0.451449	0.651666	0.862646
ENSMUSG00000006315	TMEM147	1405.86	-0.115315	0.188583	-0.611482	0.540881	0.799709
ENSMUSG00000006333	RPS9	54379.5	-0.328351	0.18246	-1.79957	0.0719279	0.280408
ENSMUSG00000006335	TFPT	651.152	0.238402	0.124262	1.91854	0.0550425	0.238171
ENSMUSG00000006342	SUSD2	87.4178	0.344742	0.353342	0.975662	0.329232	0.641296
ENSMUSG00000006344	GGT5	124.419	-0.34746	0.390794	-0.889114	0.373942	0.683217
ENSMUSG00000006345	GGT1	168.833	1.1863	0.637132	1.86194	0.0626116	0.258272
ENSMUSG00000006356	CRIP2	239.459	1.67616	0.363494	4.61125	4.00246e-06	0.000171677
ENSMUSG00000006360	CRIP1	19710	0.0703332	0.235607	0.29852	0.765306	0.915706
ENSMUSG00000006362	CBFA2T3	2890.63	-0.224911	0.284485	-0.790592	0.429182	0.72374
ENSMUSG00000006369	FBLN1	23.0955	-1.53976	0.598801	-2.57141	0.0101285	0.0787429
ENSMUSG00000006373	PGRMC1	2414.41	0.173295	0.16423	1.0552	0.291336	0.605556
ENSMUSG00000006378	GCAT	99.3951	0.0231476	0.410331	0.056412	0.955014	0.98601
ENSMUSG00000006386	TEK	0.396654	-0.00932521	0.36371	-0.0256391	0.979545	NA
ENSMUSG00000006389	MPL	2.93531	-0.38068	0.635849	-0.598695	0.549376	0.805153
ENSMUSG00000006390	ELOVL1	1795.88	-0.124981	0.189605	-0.659166	0.509789	0.778857
ENSMUSG00000006392	MED8	1108.59	-0.231879	0.101894	-2.27568	0.0228651	0.136698
ENSMUSG00000006395	HYI	239.282	-0.162541	0.193077	-0.841844	0.399875	0.701471
ENSMUSG00000006398	CDC20	2274.18	0.211441	0.310758	0.680406	0.496247	0.769531
ENSMUSG00000006403	ADAMTS4	1.19173	0.0681745	0.60388	0.112894	0.910115	NA
ENSMUSG00000006411	NECTIN4	9.47116	0.879012	0.561611	1.56516	0.117545	0.373436
ENSMUSG00000006412	PFDN2	1291.9	0.0479899	0.11994	0.400115	0.689072	0.882397
ENSMUSG00000006418	RNF114	6086.4	0.116197	0.218186	0.532561	0.594338	0.832169
ENSMUSG00000006423	C330007P06RIK	1694.34	-0.34845	0.217101	-1.60502	0.10849	0.356532
ENSMUSG00000006435	NEURL1A	6.82529	2.20137	0.659193	3.33949	0.000839319	0.0122549
ENSMUSG00000006442	SRM	2835.83	-0.423919	0.303913	-1.39487	0.163054	0.448152
ENSMUSG00000006445	EPHA2	71.0675	0.904691	0.428802	2.10981	0.0348744	0.17911
ENSMUSG00000006456	RBM14	3475.47	-0.102352	0.185656	-0.551298	0.581429	0.823462
ENSMUSG00000006457	ACTN3	19.1388	1.1305	0.440573	2.56597	0.0102888	0.0795359
ENSMUSG00000006462	A530013C23RIK	0.1098	0.0838894	0.282173	0.297297	0.766239	NA
ENSMUSG00000006463	ZDHHC24	313.631	-0.0405664	0.202012	-0.200812	0.840846	0.947121
ENSMUSG00000006464	BBS1	141.379	0.466209	0.331425	1.40668	0.159522	0.443634
ENSMUSG00000006469	SLC34A3	0	NA	NA	NA	NA	NA
ENSMUSG00000006471	NDOR1	1874.79	-0.152899	0.156999	-0.973887	0.330112	0.642396
ENSMUSG00000006476	NSMF	452.53	-0.540685	0.253088	-2.13635	0.0326506	0.17153
ENSMUSG00000006488	PRL7A1	0	NA	NA	NA	NA	NA
ENSMUSG00000006490	PRL8A9	0	NA	NA	NA	NA	NA
ENSMUSG00000006494	PDK1	3894.21	0.436099	0.139267	3.13139	0.00173981	0.0215131
ENSMUSG00000006498	PTBP1	22475.4	-0.237928	0.161988	-1.46881	0.141886	0.417525
ENSMUSG00000006517	MVD	801.853	-0.0354166	0.246537	-0.143656	0.885772	0.961782
ENSMUSG00000006519	CYBA	3705.85	0.172349	0.197612	0.872159	0.383122	0.690166
ENSMUSG00000006522	ITIH3	0	NA	NA	NA	NA	NA
ENSMUSG00000006526	TMEM110	502.971	-0.168968	0.14505	-1.16489	0.244063	0.555291
ENSMUSG00000006527	SFMBT1	1269.09	0.11944	0.176643	0.676162	0.498938	0.770943
ENSMUSG00000006529	ITIH1	0	NA	NA	NA	NA	NA
ENSMUSG00000006538	IHH	3.05778	1.39225	0.660431	2.10809	0.0350231	0.179616
ENSMUSG00000006542	PRKAG3	0.419888	-0.239091	0.368879	-0.648157	0.516884	NA
ENSMUSG00000006546	CRYBA2	0	NA	NA	NA	NA	NA
ENSMUSG00000006567	ATP7B	24.5232	0.413926	0.504433	0.820578	0.411887	0.711065
ENSMUSG00000006570	DEFB2	0	NA	NA	NA	NA	NA
ENSMUSG00000006574	SLC4A1	0.572302	-0.0123027	0.465307	-0.0264399	0.978906	NA
ENSMUSG00000006575	RUNDC3A	125.59	0.0976214	0.44074	0.221494	0.824707	0.940881
ENSMUSG00000006576	SLC4A3	0.254844	0	0.290116	0	1	NA
ENSMUSG00000006585	CDT1	2873.1	-0.0356512	0.253582	-0.14059	0.888194	0.962158
ENSMUSG00000006586	RUNX1T1	0	NA	NA	NA	NA	NA
ENSMUSG00000006587	SNAI3	750.055	0.556604	0.331797	1.67754	0.0934361	0.327284
ENSMUSG00000006589	APRT	1619.39	-0.692281	0.233603	-2.9635	0.00304163	0.0326967
ENSMUSG00000006599	GTF2H1	1832.13	-0.236093	0.146622	-1.61021	0.107351	0.354109
ENSMUSG00000006611	HFE	49.7056	-0.671097	0.339253	-1.97816	0.0479109	0.218644
ENSMUSG00000006638	ABHD1	119.147	-0.166475	0.386035	-0.431243	0.666291	0.870176
ENSMUSG00000006641	SLC5A6	725.891	0.371599	0.261095	1.42323	0.154668	0.437755
ENSMUSG00000006642	TCF23	0.0269766	0	0.282173	0	1	NA
ENSMUSG00000006649	NPHS1	173.951	-0.975778	0.380164	-2.56673	0.0102663	0.0794688
ENSMUSG00000006651	APLP1	21.3879	1.23	0.638918	1.92514	0.0542123	0.236543
ENSMUSG00000006673	QRICH1	5334.23	-0.218809	0.0907781	-2.41037	0.0159362	0.107491
ENSMUSG00000006675	P4HTM	118.114	-0.236257	0.235155	-1.00468	0.315049	0.628271
ENSMUSG00000006676	USP19	6913.77	0.0802732	0.134262	0.597883	0.549918	0.805535
ENSMUSG00000006678	POLA1	1895.77	-0.165053	0.379269	-0.435188	0.663426	0.86824
ENSMUSG00000006699	CDC42	13376.7	-0.225556	0.116572	-1.93491	0.0530016	0.233307
ENSMUSG00000006705	PKNOX1	2161.37	-0.399933	0.121622	-3.28834	0.0010078	0.0141158
ENSMUSG00000006711	D130043K22RIK	1.05615	0.197345	0.60285	0.327354	0.743401	NA
ENSMUSG00000006715	GMNN	1095.85	-0.0980325	0.313499	-0.312705	0.754505	0.910272
ENSMUSG00000006717	ACOT13	760.204	0.0971485	0.141843	0.684902	0.493406	0.767941
ENSMUSG00000006720	ZFP184	225.024	0.155625	0.305518	0.509379	0.610487	0.840837
ENSMUSG00000006724	CYP27B1	6.9427	0.785289	0.586828	1.33819	0.180834	0.475514
ENSMUSG00000006728	CDK4	13667.6	-0.140149	0.173466	-0.807937	0.419127	0.716394
ENSMUSG00000006731	B4GALNT1	9276.59	-0.0323	0.342609	-0.0942765	0.924889	0.975066
ENSMUSG00000006732	METTL1	821.855	-0.312985	0.261158	-1.19845	0.230742	0.53976
ENSMUSG00000006736	TSPAN31	3123.11	-0.0182385	0.188811	-0.0965969	0.923047	0.974686
ENSMUSG00000006740	KIF5B	3861.38	-0.275634	0.242522	-1.13653	0.255735	0.568003
ENSMUSG00000006763	SAAL1	939.892	-0.176162	0.093264	-1.88885	0.0589115	0.248329
ENSMUSG00000006764	TPH2	0.0309578	0.0395501	0.282173	0.140163	0.888532	NA
ENSMUSG00000006777	KRT23	0	NA	NA	NA	NA	NA
ENSMUSG00000006782	CNP	8746.02	-0.0332886	0.168089	-0.198042	0.843013	0.948016
ENSMUSG00000006784	TTC25	4.94185	0.723583	0.628416	1.15144	0.249551	0.561026
ENSMUSG00000006800	SULF2	32.4758	0.121491	0.463683	0.262013	0.793312	0.927986
ENSMUSG00000006818	SOD2	2539.7	0.0746521	0.133881	0.557602	0.577116	0.820671
ENSMUSG00000006850	TMCO6	652.871	-0.0648115	0.163817	-0.395634	0.692375	0.883792
ENSMUSG00000006906	STAMBP	1131.18	0.221413	0.091195	2.42791	0.015186	0.104035
ENSMUSG00000006920	EZH1	2205.81	-0.204303	0.213224	-0.958164	0.33798	0.650107
ENSMUSG00000006930	HAP1	14.6227	0.231751	0.5974	0.387933	0.698065	0.886636
ENSMUSG00000006931	P3H4	3.72011	-1.20202	0.659521	-1.82256	0.0683695	0.273797
ENSMUSG00000006932	CTNNB1	11087.8	0.00467889	0.0982028	0.0476451	0.961999	0.988499
ENSMUSG00000006941	EIF1B	2431.88	-0.0377067	0.144358	-0.261202	0.793936	0.928135
ENSMUSG00000006948	KLK4	0	NA	NA	NA	NA	NA
ENSMUSG00000006958	CHRD	0.191616	0.172568	0.282173	0.611567	0.540824	NA
ENSMUSG00000006998	PSMD2	8946.77	-0.111587	0.100414	-1.11127	0.266451	0.577927
ENSMUSG00000007021	SYNGR3	1.77689	0.510874	0.665254	0.767938	0.442524	NA
ENSMUSG00000007029	VARS	12205.7	0.170018	0.178468	0.952654	0.340765	0.652667
ENSMUSG00000007030	VWA7	7.18715	1.02682	0.588733	1.74412	0.0811373	0.300897
ENSMUSG00000007033	HSPA1L	1.63914	-0.446112	0.664817	-0.671029	0.502202	NA
ENSMUSG00000007034	SLC44A4	0.182984	0	0.282173	0	1	NA
ENSMUSG00000007035	MSH5	194.16	-0.00770323	0.186595	-0.0412831	0.96707	0.989378
ENSMUSG00000007036	ABHD16A	1912.31	-0.0882264	0.148	-0.596125	0.551091	0.806155
ENSMUSG00000007038	NEU1	1277.42	-0.306838	0.148574	-2.06522	0.0389026	0.191588
ENSMUSG00000007039	DDAH2	822.053	-0.0436031	0.337474	-0.129204	0.897196	0.966165
ENSMUSG00000007041	CLIC1	11848.6	-0.131496	0.16941	-0.7762	0.437631	0.729597
ENSMUSG00000007050	LSM2	1382.8	-0.110462	0.209866	-0.526347	0.598647	0.834638
ENSMUSG00000007080	POLE	3232.01	0.290142	0.304747	0.952073	0.34106	0.652876
ENSMUSG00000007097	ATP1A2	1.33129	0.0988902	0.60559	0.163296	0.870286	NA
ENSMUSG00000007107	ATP1A4	0	NA	NA	NA	NA	NA
ENSMUSG00000007122	CASQ1	0.0745184	0	0.282173	0	1	NA
ENSMUSG00000007207	STX1A	99.3095	0.568283	0.489337	1.16133	0.245507	0.556444
ENSMUSG00000007209	CEACAM9	0.0423077	0	0.282173	0	1	NA
ENSMUSG00000007216	ZFP775	566.398	-0.214745	0.19198	-1.11858	0.263318	0.57554
ENSMUSG00000007279	SCUBE2	0	NA	NA	NA	NA	NA
ENSMUSG00000007338	MRPL49	1564.1	-0.13771	0.12065	-1.1414	0.253704	0.566274
ENSMUSG00000007379	DENND2C	39.6837	0.929964	0.426653	2.17968	0.0292816	0.160039
ENSMUSG00000007411	MARK3	2231.48	-0.214428	0.0958669	-2.23673	0.0253042	0.14566
ENSMUSG00000007415	GATAD1	2353.3	0.145353	0.107215	1.35572	0.175188	0.466734
ENSMUSG00000007440	PCDHA11	0	NA	NA	NA	NA	NA
ENSMUSG00000007457	2310003L06RIK	0	NA	NA	NA	NA	NA
ENSMUSG00000007458	M6PR	8259.78	-0.322954	0.0914005	-3.53339	0.000410263	0.00707066
ENSMUSG00000007476	LRRC8A	1319.51	-0.025851	0.187565	-0.137824	0.89038	0.962866
ENSMUSG00000007480	MC5R	4.09923	-0.414621	0.672136	-0.616871	0.53732	0.796647
ENSMUSG00000007564	PPP2R1A	8875.54	-0.205601	0.156542	-1.31339	0.189051	0.487435
ENSMUSG00000007570	FANCE	635.024	-0.0634075	0.180933	-0.350447	0.726003	0.900437
ENSMUSG00000007589	TINF2	1252.14	0.0228814	0.131628	0.173834	0.861996	0.953459
ENSMUSG00000007591	TSSK4	31.2455	-0.222927	0.383698	-0.580996	0.561243	0.810422
ENSMUSG00000007594	HAPLN4	0.475408	0.311251	0.377895	0.823643	0.410142	NA
ENSMUSG00000007603	DUS3L	1567.3	0.622965	0.129249	4.81987	1.43654e-06	7.41995e-05
ENSMUSG00000007610	GTPBP3	722.287	-0.175301	0.140542	-1.24732	0.212279	0.518195
ENSMUSG00000007613	TGFBR1	2149.74	0.0518069	0.311226	0.16646	0.867795	0.955513
ENSMUSG00000007617	HOMER1	436.227	0.457247	0.256651	1.78159	0.0748163	0.287128
ENSMUSG00000007646	RAD51C	221.388	0.208467	0.277174	0.752117	0.451981	0.741002
ENSMUSG00000007653	GABRB2	0	NA	NA	NA	NA	NA
ENSMUSG00000007655	CAV1	0.78771	-0.0748829	0.576673	-0.129853	0.896682	NA
ENSMUSG00000007656	ARPP19	2169.25	-0.19395	0.166559	-1.16445	0.244242	0.555479
ENSMUSG00000007659	BCL2L1	1327.41	0.275965	0.212502	1.29865	0.194065	0.494141
ENSMUSG00000007670	KHSRP	6699.61	0.0384119	0.175676	0.218652	0.826921	0.942423
ENSMUSG00000007682	DIO2	404.583	0.403948	0.330713	1.22144	0.221918	0.529496
ENSMUSG00000007721	CCDC124	1722.24	0.208672	0.220101	0.948072	0.343093	0.654034
ENSMUSG00000007739	CCT4	9904.31	-0.189639	0.142146	-1.33411	0.182168	0.476909
ENSMUSG00000007777	0610009B22RIK	414.763	0.786365	0.183194	4.29253	1.76647e-05	0.00060046
ENSMUSG00000007783	CPT1C	3.66608	0.806821	0.636353	1.26788	0.20484	0.508404
ENSMUSG00000007805	TWIST2	0	NA	NA	NA	NA	NA
ENSMUSG00000007812	ZFP655	1599.22	-0.227823	0.201909	-1.12834	0.259174	0.570416
ENSMUSG00000007815	RHOA	18052.3	-0.124331	0.101824	-1.22104	0.222073	0.529664
ENSMUSG00000007817	ZMIZ1	10517.7	0.287702	0.166053	1.73259	0.0831682	0.305075
ENSMUSG00000007827	ANKRD26	592.337	-0.528372	0.238852	-2.21213	0.0269578	0.151676
ENSMUSG00000007833	ALDH16A1	1920.99	0.168523	0.163871	1.02839	0.303765	0.617993
ENSMUSG00000007836	HNRNPA0	11985.9	-0.0850137	0.107267	-0.792542	0.428045	0.723299
ENSMUSG00000007837	PRRG2	111.28	1.26375	0.284269	4.44562	8.76393e-06	0.000330569
ENSMUSG00000007850	HNRNPH1	6896.38	-0.438129	0.260613	-1.68115	0.0927341	0.32547
ENSMUSG00000007867	IFT43	10.3167	-0.0674349	0.608668	-0.110791	0.911782	0.97061
ENSMUSG00000007872	ID3	4478.64	0.521727	0.323023	1.61514	0.10628	0.352152
ENSMUSG00000007877	TCAP	2.33041	0.150476	0.671137	0.224211	0.822593	0.939576
ENSMUSG00000007880	ARID1A	18440.8	0.315392	0.205271	1.53647	0.124424	0.386089
ENSMUSG00000007888	CRLF1	4.14335	-0.645117	0.621098	-1.03867	0.298958	0.6131
ENSMUSG00000007891	CTSD	13666.7	0.0869037	0.19718	0.440732	0.659407	0.866448
ENSMUSG00000007892	RPLP1	37921.2	-0.35032	0.212205	-1.65086	0.098768	0.338737
ENSMUSG00000007907	CABS1	0	NA	NA	NA	NA	NA
ENSMUSG00000007908	HMGCLL1	0.668897	0.344525	0.498708	0.690835	0.489669	NA
ENSMUSG00000007944	TTC9B	1.3286	-0.0433882	0.662937	-0.0654485	0.947817	NA
ENSMUSG00000007946	PHOX2A	0	NA	NA	NA	NA	NA
ENSMUSG00000007950	ABHD8	5851.15	0.451409	0.236824	1.9061	0.0566378	0.242477
ENSMUSG00000007987	IFT22	331.353	-0.157119	0.228136	-0.688706	0.491008	0.766226
ENSMUSG00000007989	FZD3	15.73	0.126118	0.442824	0.284804	0.775794	0.919788
ENSMUSG00000008028	1700008O03RIK	10.3677	0.636465	0.537257	1.18466	0.236153	0.544336
ENSMUSG00000008035	MID1IP1	920.357	0.151299	0.151614	0.997922	0.318317	0.630519
ENSMUSG00000008036	AP2S1	2931.56	-0.198659	0.175127	-1.13437	0.256639	0.568107
ENSMUSG00000008090	FGFRL1	272.621	0.531914	0.202424	2.62772	0.00859592	0.0705054
ENSMUSG00000008129	4930432K21RIK	137.626	0.130328	0.215121	0.605838	0.544622	0.801862
ENSMUSG00000008136	FHL2	480.598	-0.850895	0.308804	-2.75545	0.00586106	0.053114
ENSMUSG00000008140	EMC10	4720.53	-0.16181	0.187333	-0.863757	0.387721	0.693667
ENSMUSG00000008153	CLSTN3	70.4377	0.0547112	0.504661	0.108412	0.913669	0.971208
ENSMUSG00000008167	FBXW9	297.53	0.337346	0.206541	1.63331	0.102403	0.344752
ENSMUSG00000008193	SPIB	553.997	0.105767	0.60325	0.175329	0.860821	0.952896
ENSMUSG00000008200	FNBP4	3479.54	-0.0574151	0.188358	-0.30482	0.760504	0.913243
ENSMUSG00000008206	CERS4	350.44	0.952056	0.457672	2.08021	0.0375059	0.187203
ENSMUSG00000008226	SCRN3	201.396	0.425995	0.193059	2.20655	0.0273455	0.153206
ENSMUSG00000008301	PHAX	1603.24	0.0478858	0.111718	0.42863	0.668192	0.871467
ENSMUSG00000008305	TLE1	562.131	0.635963	0.275055	2.31213	0.0207706	0.128324
ENSMUSG00000008307	1700109H08RIK	61.4632	0.0864723	0.440072	0.196496	0.844222	0.948069
ENSMUSG00000008318	RELT	922.176	0.552573	0.236692	2.33456	0.0195662	0.123319
ENSMUSG00000008333	SNRPB2	2335.25	-0.190108	0.199223	-0.954251	0.339957	0.652201
ENSMUSG00000008348	UBC	20490.4	0.0382589	0.159048	0.240549	0.809905	0.934485
ENSMUSG00000008373	PRPF31	3175.67	-0.115935	0.153957	-0.753032	0.451431	0.740214
ENSMUSG00000008384	SERTAD1	627.047	0.370307	0.257354	1.4389	0.150179	0.431161
ENSMUSG00000008393	CARHSP1	1326.55	-0.0688867	0.328439	-0.20974	0.833871	0.945281
ENSMUSG00000008398	ELK3	2660.31	-0.782052	0.297111	-2.63219	0.00848371	0.0698515
ENSMUSG00000008429	HERPUD2	1246.6	0.374245	0.130655	2.86437	0.00417834	0.0414939
ENSMUSG00000008435	RDH13	650.198	0.138014	0.125847	1.09668	0.27278	0.585061
ENSMUSG00000008438	ADAM21	2.56918	0.979883	0.670797	1.46077	0.144078	0.421308
ENSMUSG00000008450	NUTF2	939.306	-0.506157	0.188467	-2.68565	0.00723888	0.0620372
ENSMUSG00000008461	FUT1	0.155332	0	0.282173	0	1	NA
ENSMUSG00000008475	ARPC5	8644.94	-0.0111189	0.126406	-0.0879616	0.929907	0.976877
ENSMUSG00000008482	RNF151	1.44849	-0.27598	0.653093	-0.422573	0.672607	NA
ENSMUSG00000008489	ELAVL2	0.234957	0	0.282173	0	1	NA
ENSMUSG00000008496	POU2F2	155.755	-0.201793	0.424567	-0.47529	0.63458	0.853591
ENSMUSG00000008540	MGST1	30.357	1.49953	0.508841	2.94695	0.00320927	0.0339277
ENSMUSG00000008575	NFIB	3.21019	-1.26176	0.661239	-1.90817	0.0563687	0.24166
ENSMUSG00000008590	HTR3B	0	NA	NA	NA	NA	NA
ENSMUSG00000008601	RAB25	2.44133	-1.03401	0.671571	-1.53969	0.123636	0.384755
ENSMUSG00000008604	UBQLN4	3570.46	0.193133	0.152053	1.27017	0.204024	0.507496
ENSMUSG00000008658	RBFOX1	0.142207	-0.00478913	0.282173	-0.0169723	0.986459	NA
ENSMUSG00000008668	RPS18	34760	-0.57852	0.180491	-3.20527	0.00134938	0.0174506
ENSMUSG00000008682	RPL10	8545.79	-0.102661	0.228467	-0.449347	0.653181	0.863237
ENSMUSG00000008683	RPS15A	27383	-0.658477	0.175532	-3.75132	0.000175905	0.00369421
ENSMUSG00000008690	NCAPH2	5978.27	-0.216424	0.180107	-1.20164	0.229502	0.53848
ENSMUSG00000008730	HIPK1	9388.73	-0.0111094	0.194326	-0.057169	0.954411	0.985819
ENSMUSG00000008734	GPRC5B	321.842	0.49801	0.492474	1.01124	0.311901	0.626187
ENSMUSG00000008763	MAN1A2	2711.35	0.15228	0.150539	1.01157	0.311744	0.626035
ENSMUSG00000008789	CEACAM5	0	NA	NA	NA	NA	NA
ENSMUSG00000008813	TPPP2	0.123696	0	0.282173	0	1	NA
ENSMUSG00000008822	ACYP1	557.44	-0.53067	0.162006	-3.27562	0.0010543	0.0145704
ENSMUSG00000008843	CLDN13	0	NA	NA	NA	NA	NA
ENSMUSG00000008845	CD163	116.444	0.411752	0.283063	1.45463	0.145771	0.423811
ENSMUSG00000008855	HDAC5	1241.48	0.878364	0.222853	3.94144	8.09934e-05	0.00204866
ENSMUSG00000008859	RALA	1325.09	-0.107188	0.160256	-0.668855	0.503588	0.774265
ENSMUSG00000008874	CLEC3A	0	NA	NA	NA	NA	NA
ENSMUSG00000008892	VDAC3	3896.45	-0.125047	0.15007	-0.833259	0.404699	0.705277
ENSMUSG00000008932	SLC1A7	0	NA	NA	NA	NA	NA
ENSMUSG00000008958	VPS72	2307.78	0.188837	0.195881	0.96404	0.335026	0.647276
ENSMUSG00000008976	GABPA	2344.78	-0.151702	0.192837	-0.786687	0.431465	0.725445
ENSMUSG00000008999	BMP7	288.389	-1.01123	0.338597	-2.98653	0.00282161	0.0308923
ENSMUSG00000009013	DYNLL1	5798.85	-0.504323	0.193618	-2.60473	0.0091946	0.0737626
ENSMUSG00000009030	PDCL	1417.97	0.130306	0.15086	0.863752	0.387724	0.693667
ENSMUSG00000009035	TMEM184B	1685.8	-0.153198	0.188033	-0.81474	0.415221	0.713395
ENSMUSG00000009047	GM5965	0	NA	NA	NA	NA	NA
ENSMUSG00000009070	RSPH14	0.070509	-0.00478913	0.282173	-0.0169723	0.986459	NA
ENSMUSG00000009073	NF2	2894.35	0.204094	0.101395	2.01287	0.0441285	0.207891
ENSMUSG00000009075	CABP7	5.86627	-0.322155	0.620025	-0.519584	0.603354	0.837045
ENSMUSG00000009076	ZMAT5	865.273	0.206557	0.20781	0.993973	0.320236	0.632384
ENSMUSG00000009079	EWSR1	15076.6	-0.0638358	0.127441	-0.500903	0.616439	0.843656
ENSMUSG00000009090	AP1B1	6876.53	0.143598	0.197343	0.727657	0.466823	0.750899
ENSMUSG00000009092	DERL3	27.8073	0.28542	0.546149	0.522604	0.60125	0.835795
ENSMUSG00000009093	GSTT4	0.973355	0.126598	0.622122	0.203494	0.838749	NA
ENSMUSG00000009097	TBX1	0.324223	0.212852	0.357089	0.596076	0.551125	NA
ENSMUSG00000009108	GNAT2	9.49749	0.0137987	0.58961	0.023403	0.981329	0.994534
ENSMUSG00000009112	BCL2L13	3180.72	0.196922	0.0716056	2.75009	0.00595785	0.0538492
ENSMUSG00000009114	2610028H24RIK	0.14594	0	0.282173	0	1	NA
ENSMUSG00000009115	SPATC1L	0.799734	-0.118016	0.480533	-0.245595	0.805996	NA
ENSMUSG00000009145	DQX1	68.531	-0.689873	0.332888	-2.07238	0.0382296	0.189714
ENSMUSG00000009185	CCL8	6.59445	1.3415	0.584735	2.2942	0.0217789	0.132133
ENSMUSG00000009207	LNPK	279.688	-0.794032	0.285694	-2.77931	0.00544743	0.0502279
ENSMUSG00000009210	PRR29	3.73825	-1.94165	0.6641	-2.92373	0.00345868	0.0359018
ENSMUSG00000009214	TMEM8C	0.939298	-0.246016	0.435406	-0.565025	0.572056	NA
ENSMUSG00000009216	FAM163B	923.256	-3.55329	0.581484	-6.11072	9.91846e-10	1.50971e-07
ENSMUSG00000009246	TRPM5	1.59515	-0.850442	0.666729	-1.27554	0.202117	NA
ENSMUSG00000009248	ASCL2	0.0992939	0	0.282173	0	1	NA
ENSMUSG00000009281	RARRES2	3.85577	-0.643736	0.663195	-0.970659	0.331718	0.64404
ENSMUSG00000009291	PTTG1IP	2444.72	0.290098	0.153989	1.88388	0.0595807	0.250253
ENSMUSG00000009292	TRPM2	15.4846	-0.151265	0.476023	-0.317768	0.750661	0.908954
ENSMUSG00000009293	UBE2G2	1921.5	-0.0152034	0.137635	-0.110462	0.912043	0.970799
ENSMUSG00000009350	MPO	16.6498	0.25754	0.445515	0.578072	0.563216	0.811315
ENSMUSG00000009356	LPO	0	NA	NA	NA	NA	NA
ENSMUSG00000009376	MET	6.6835	1.46314	0.629931	2.32269	0.0201956	0.125994
ENSMUSG00000009378	SLC16A12	0.452118	-0.141595	0.457235	-0.309678	0.756806	NA
ENSMUSG00000009394	SYN2	0.3312	-0.226311	0.282187	-0.80199	0.422559	NA
ENSMUSG00000009406	ELK1	1041.71	-0.02027	0.204433	-0.0991523	0.921017	0.974262
ENSMUSG00000009418	NAV1	99.8846	0.548513	0.45559	1.20396	0.228605	0.537233
ENSMUSG00000009470	TNPO1	6780.74	-0.0988341	0.211533	-0.467229	0.640336	0.85657
ENSMUSG00000009471	MYOD1	0.0788999	0	0.282173	0	1	NA
ENSMUSG00000009487	OTOG	0.0868815	0	0.282173	0	1	NA
ENSMUSG00000009535	RNMT	1666.67	0.00717035	0.194465	0.0368723	0.970587	0.99063
ENSMUSG00000009545	KCNQ1	0.0400477	0	0.282173	0	1	NA
ENSMUSG00000009549	SRP14	3219.92	-0.362502	0.132508	-2.73569	0.0062249	0.0557357
ENSMUSG00000009551	6330409D20RIK	0.0765375	0	0.282173	0	1	NA
ENSMUSG00000009555	CDK9	3927.65	-0.054804	0.10841	-0.505525	0.61319	0.842271
ENSMUSG00000009563	TOR2A	2037.59	0.244492	0.190537	1.28317	0.199431	0.501273
ENSMUSG00000009566	FPGS	1333.9	0.0285811	0.197495	0.144718	0.884933	0.961782
ENSMUSG00000009569	MKL2	1256.03	-0.173469	0.170328	-1.01844	0.308468	0.622875
ENSMUSG00000009575	CBX5	8351.4	-0.0573281	0.309018	-0.185517	0.852824	0.950529
ENSMUSG00000009580	ODAM	0	NA	NA	NA	NA	NA
ENSMUSG00000009585	APOBEC3	10908.1	-0.0939939	0.151191	-0.621689	0.534146	0.794936
ENSMUSG00000009588	ST6GALNAC1	5.11024	-1.82437	0.659753	-2.76523	0.00568831	0.0519315
ENSMUSG00000009596	TAF7L	0	NA	NA	NA	NA	NA
ENSMUSG00000009614	SARDH	17.1458	-2.30573	0.574921	-4.01051	6.05866e-05	0.00163593
ENSMUSG00000009621	VAV2	1147.21	-0.0300665	0.138711	-0.216757	0.828397	0.942951
ENSMUSG00000009628	TEX15	34.1411	-0.100972	0.630862	-0.160053	0.872839	0.957695
ENSMUSG00000009630	PPP2CB	3212.98	-0.0622835	0.105216	-0.591961	0.553877	0.807909
ENSMUSG00000009633	G0S2	59.433	-0.997842	0.407266	-2.4501	0.0142818	0.100153
ENSMUSG00000009640	DMAP1	1172.14	-0.0595734	0.144752	-0.411554	0.680666	0.878162
ENSMUSG00000009646	PLA2G12B	0.172567	0	0.282173	0	1	NA
ENSMUSG00000009647	MCU	659.312	-0.0634187	0.190901	-0.332207	0.739733	0.90513
ENSMUSG00000009654	OIT3	0.673619	0.418855	0.446636	0.9378	0.348347	NA
ENSMUSG00000009670	TEX11	67.3487	0.0188915	0.3805	0.049649	NA	NA
ENSMUSG00000009681	BCR	4812.88	-0.0859774	0.185041	-0.464639	0.64219	0.857849
ENSMUSG00000009687	FXYD5	5550.46	-0.645041	0.23728	-2.71848	0.00655831	0.0578773
ENSMUSG00000009731	KCND1	7.89226	1.1641	0.597502	1.94829	0.0513807	0.228417
ENSMUSG00000009733	TFCP2	387.65	-0.374015	0.165769	-2.25625	0.0240551	0.14135
ENSMUSG00000009734	POU6F2	0	NA	NA	NA	NA	NA
ENSMUSG00000009739	POU6F1	681.322	-0.035912	0.236434	-0.15189	0.879274	0.959623
ENSMUSG00000009741	UBP1	2552.01	0.030383	0.144179	0.210731	0.833097	0.944891
ENSMUSG00000009772	NUAK2	165.784	0.0645094	0.235524	0.273898	0.784163	0.923591
ENSMUSG00000009828	ICK	1261.5	0.17419	0.138117	1.26118	0.207244	0.511334
ENSMUSG00000009863	SDHB	4801.41	0.15547	0.190672	0.815378	0.414856	0.713336
ENSMUSG00000009876	COX4I2	7.34004	0.048106	0.596935	0.0805883	0.935769	0.978486
ENSMUSG00000009894	SNAP47	766.205	-0.0567326	0.206151	-0.2752	0.783163	0.923056
ENSMUSG00000009900	WNT3A	0	NA	NA	NA	NA	NA
ENSMUSG00000009905	KDSR	1218.96	0.349469	0.158956	2.19852	0.0279118	0.155467
ENSMUSG00000009907	VPS4B	3892.73	-0.124414	0.188732	-0.659211	0.50976	0.778857
ENSMUSG00000009927	RPS25	25061.1	-0.323477	0.179233	-1.80479	0.0711083	0.279302
ENSMUSG00000009941	NXF2	17.7973	0.893465	0.428508	2.08506	0.0370636	0.185735
ENSMUSG00000009995	TAZ	1192.85	0.106718	0.141017	0.756773	0.449186	0.738552
ENSMUSG00000010021	KIF19A	1.64702	-0.0993472	0.667614	-0.148809	0.881704	NA
ENSMUSG00000010025	ALDH3A2	972.935	0.0321362	0.183848	0.174798	0.861238	0.953115
ENSMUSG00000010044	ZMYND10	12.6672	0.668707	0.519392	1.28748	0.197927	0.499232
ENSMUSG00000010045	TMEM115	1470.21	0.241776	0.186994	1.29296	0.196024	0.496654
ENSMUSG00000010047	HYAL2	858.957	-0.00656083	0.219629	-0.0298723	0.976169	0.992732
ENSMUSG00000010048	IFRD2	1545.08	-0.231996	0.268502	-0.864041	0.387566	0.693667
ENSMUSG00000010051	HYAL1	34.8129	0.36695	0.382652	0.958965	0.337576	0.649694
ENSMUSG00000010054	TUSC2	1348.01	-0.11345	0.183205	-0.619253	0.53575	0.795593
ENSMUSG00000010057	NPRL2	1064.35	0.0970748	0.168047	0.577666	0.56349	0.811523
ENSMUSG00000010064	SLC38A3	0.811926	-0.0564765	0.552896	-0.102147	0.91864	NA
ENSMUSG00000010066	CACNA2D2	185.518	-0.643872	0.244828	-2.6299	0.00854112	0.0701563
ENSMUSG00000010067	RASSF1	1417.94	-0.232093	0.157569	-1.47296	0.140761	0.415422
ENSMUSG00000010080	EPN3	0.138639	0	0.282173	0	1	NA
ENSMUSG00000010086	RNF112	0.398207	-0.0069127	0.368885	-0.0187394	0.985049	NA
ENSMUSG00000010095	SLC3A2	4386.59	0.016034	0.164732	0.0973344	0.922461	0.97465
ENSMUSG00000010097	NXF1	7073.21	0.232491	0.0981713	2.36822	0.017874	0.11654
ENSMUSG00000010110	STX5A	2577.25	-0.0844885	0.141015	-0.599145	0.549076	0.804902
ENSMUSG00000010122	SLC47A1	0.049232	0	0.282173	0	1	NA
ENSMUSG00000010136	PIFO	0.0296678	0	0.282173	0	1	NA
ENSMUSG00000010142	TNFRSF13B	1758.16	0.00962502	0.148552	0.0647922	0.948339	0.984024
ENSMUSG00000010154	SPIRE2	51.9596	0.795663	0.475812	1.67222	0.0944807	0.329388
ENSMUSG00000010175	PROX1	4.51312	0.37979	0.627155	0.605576	0.544796	0.801887
ENSMUSG00000010205	RAVER1	10087.5	-0.165918	0.166199	-0.998309	0.31813	0.630372
ENSMUSG00000010277	2610507B11RIK	12817.7	0.125496	0.10545	1.1901	0.234009	0.542659
ENSMUSG00000010290	AI597479	822.204	0.101769	0.166092	0.612725	0.540058	0.799191
ENSMUSG00000010307	TMEM86A	178.554	0.210571	0.224637	0.937385	0.34856	0.65918
ENSMUSG00000010311	OPTC	0.0423077	0	0.282173	0	1	NA
ENSMUSG00000010342	TEX14	12.5268	-0.0196805	0.588778	-0.033426	0.973335	0.991552
ENSMUSG00000010358	IFI35	1383.08	-0.0125768	0.223771	-0.0562041	0.955179	0.98601
ENSMUSG00000010362	RDM1	413.834	-0.298061	0.251951	-1.18301	0.236804	0.545178
ENSMUSG00000010376	NEDD8	2486.87	-0.204172	0.156222	-1.30693	0.191235	0.490127
ENSMUSG00000010392	GOSR1	2487.59	-0.106955	0.148803	-0.718769	0.472284	0.753412
ENSMUSG00000010406	MRPL52	1247.43	-0.210821	0.22992	-0.916932	0.359178	0.669397
ENSMUSG00000010435	SPACA7	0	NA	NA	NA	NA	NA
ENSMUSG00000010453	KANSL3	3233.03	-0.128134	0.0890346	-1.43915	0.150109	0.431092
ENSMUSG00000010461	EYA4	0.483037	0.105028	0.419119	0.250592	0.802129	NA
ENSMUSG00000010476	EBF3	0.420752	0.335236	0.375215	0.893449	0.371617	NA
ENSMUSG00000010492	UCKL1OS	5.16677	-0.730669	0.597207	-1.22348	0.22115	0.528915
ENSMUSG00000010505	MYT1	0.423639	-0.261632	0.453408	-0.577036	0.563915	NA
ENSMUSG00000010517	FAF1	2305.58	0.0585783	0.118967	0.49239	0.622443	0.847331
ENSMUSG00000010529	GM266	7.60542	-1.17358	0.641744	-1.82874	0.0674388	0.271144
ENSMUSG00000010538	TSACC	137.431	0.209017	0.290292	0.720022	0.471512	0.753227
ENSMUSG00000010554	METTL16	1546.13	0.00665702	0.17354	0.0383602	0.9694	0.989889
ENSMUSG00000010592	DAZL	1.77198	-0.255996	0.670812	-0.381622	0.702742	NA
ENSMUSG00000010601	APOL7A	0	NA	NA	NA	NA	NA
ENSMUSG00000010607	PIGYL	626.261	0.230828	0.22058	1.04646	0.295349	0.609181
ENSMUSG00000010608	RBM25	5251.68	-0.290472	0.184444	-1.57485	0.115291	0.369028
ENSMUSG00000010609	PSEN2	720.453	0.327325	0.262686	1.24607	0.212739	0.518599
ENSMUSG00000010651	ACAA1B	1.39602	0.138858	0.544362	0.255085	0.798658	NA
ENSMUSG00000010660	PLCD1	2.54506	-0.0473124	0.668954	-0.0707259	0.943616	0.982329
ENSMUSG00000010663	FADS1	2398.63	-0.0394875	0.24431	-0.161629	0.871598	0.957005
ENSMUSG00000010721	LMBR1	105.093	0.833896	0.362242	2.30204	0.0213327	0.130392
ENSMUSG00000010751	TNFRSF22	239.447	1.19848	0.226781	5.28473	1.25891e-07	9.21412e-06
ENSMUSG00000010755	CARS	1309.41	-0.529546	0.170584	-3.10432	0.00190718	0.0230686
ENSMUSG00000010760	PHLDA2	0.194068	-0.00478913	0.282173	-0.0169723	0.986459	NA
ENSMUSG00000010796	ASZ1	0	NA	NA	NA	NA	NA
ENSMUSG00000010797	WNT2	0.160563	-0.0491284	0.282173	-0.174107	0.861781	NA
ENSMUSG00000010803	GABRA1	0	NA	NA	NA	NA	NA
ENSMUSG00000010825	GRID2IP	0.303138	0	0.282173	0	1	NA
ENSMUSG00000010830	KDELR3	1.31715	-0.581394	0.641998	-0.905601	0.365147	NA
ENSMUSG00000010841	1700006E09RIK	0	NA	NA	NA	NA	NA
ENSMUSG00000010911	APIP	437.376	0.155586	0.183874	0.846154	0.397467	0.700081
ENSMUSG00000010914	PDHX	826.675	-0.0722829	0.120562	-0.59955	0.548806	0.80466
ENSMUSG00000010936	VAC14	2012.77	-0.0127771	0.130298	-0.0980601	0.921885	0.97446
ENSMUSG00000011008	MCOLN2	944.701	0.161943	0.240078	0.674542	0.499967	0.771533
ENSMUSG00000011034	SLC5A1	0	NA	NA	NA	NA	NA
ENSMUSG00000011052	1700049J03RIK	0.103441	0	0.282173	0	1	NA
ENSMUSG00000011096	AKT1S1	1401.83	0.366831	0.184822	1.98478	0.0471687	0.216694
ENSMUSG00000011114	TBRG1	3720.38	-0.238787	0.124724	-1.91452	0.0555533	0.239274
ENSMUSG00000011118	PANX3	0	NA	NA	NA	NA	NA
ENSMUSG00000011148	ADSSL1	1138.5	-0.311917	0.305637	-1.02055	0.307469	0.621241
ENSMUSG00000011154	CFAP161	0.136252	-0.0934676	0.282173	-0.331242	0.740462	NA
ENSMUSG00000011158	BRF1	2033.44	-0.12342	0.0817493	-1.50974	0.13111	0.398215
ENSMUSG00000011171	VIPR2	69.9066	-0.522474	0.434101	-1.20358	0.228753	0.537421
ENSMUSG00000011179	ODC1	4689.78	0.0214565	0.225357	0.0952108	0.924147	0.974945
ENSMUSG00000011254	THG1L	884.88	0.12238	0.164119	0.745677	0.455863	0.743489
ENSMUSG00000011256	ADAM19	849.705	0.772142	0.464346	1.66286	0.0963407	0.333412
ENSMUSG00000011257	PABPC4	4802.18	-0.456953	0.0999602	-4.57135	4.84603e-06	0.000199884
ENSMUSG00000011263	EXOC3L2	8.3923	2.50863	0.672035	3.73288	NA	NA
ENSMUSG00000011267	ZFP296	40.8187	1.11483	0.388656	2.86842	0.00412523	0.0411565
ENSMUSG00000011305	PLIN5	0	NA	NA	NA	NA	NA
ENSMUSG00000011306	SUGP1	2491.45	0.019512	0.164003	0.118973	0.905296	0.96831
ENSMUSG00000011349	DMRTC2	3.67304	1.16279	0.514978	2.25793	NA	NA
ENSMUSG00000011350	GM5893	0	NA	NA	NA	NA	NA
ENSMUSG00000011382	DHDH	81.6406	0.612357	0.291357	2.10174	0.0355761	0.181239
ENSMUSG00000011427	ZFP790	875.015	0.167312	0.163008	1.02641	0.3047	0.618578
ENSMUSG00000011463	CPB1	9.34036	0	0.672638	0	1	1
ENSMUSG00000011486	SLC25A41	1.98833	0.256081	0.664296	0.385492	0.699873	NA
ENSMUSG00000011589	FSD1	3.81718	-0.082562	0.667656	-0.12366	0.901585	0.967136
ENSMUSG00000011632	PINLYP	0.584104	0.151123	0.479441	0.315207	0.752605	NA
ENSMUSG00000011658	FUZ	537.825	-0.0463839	0.217114	-0.213638	0.830829	0.943849
ENSMUSG00000011751	SPTBN4	21.9382	0.854064	0.522515	1.63453	0.102148	0.344518
ENSMUSG00000011752	PGAM1	6779.95	0.157955	0.158184	0.998552	0.318012	0.630372
ENSMUSG00000011831	EVI5	276.017	0.0641586	0.269101	0.238418	0.811557	0.935294
ENSMUSG00000011832	EVI5L	817.383	0.392847	0.200769	1.95671	0.0503818	0.225826
ENSMUSG00000011837	SNAPC2	954.612	0.18608	0.205124	0.907159	0.364323	0.67378
ENSMUSG00000011877	GIT1	3855.68	0.204527	0.194343	1.0524	0.292616	0.606605
ENSMUSG00000011884	GLTP	4572.91	-0.193435	0.155852	-1.24115	0.214552	0.521297
ENSMUSG00000011958	BNIP2	2006.09	-0.193378	0.137771	-1.40362	0.160432	0.444814
ENSMUSG00000011960	CCNT1	3457.6	-0.14868	0.196586	-0.756312	0.449462	0.738685
ENSMUSG00000012017	SCARF2	2.14866	-1.60859	0.670482	-2.39916	0.016433	0.109851
ENSMUSG00000012042	4930579F01RIK	0	NA	NA	NA	NA	NA
ENSMUSG00000012076	BRMS1L	494.509	-0.694897	0.195991	-3.54555	0.0003918	0.00681391
ENSMUSG00000012114	MED15	2922.6	-0.0321997	0.142181	-0.22647	0.820836	0.939056
ENSMUSG00000012117	DHDDS	2318.87	-0.0691637	0.121103	-0.571115	0.567922	0.815108
ENSMUSG00000012123	AIM1L	46.1203	0.764044	0.495027	1.54344	0.122724	0.383039
ENSMUSG00000012126	UBXN11	166.469	-0.349706	0.225285	-1.55228	0.120595	0.379081
ENSMUSG00000012187	MOGAT1	0.334408	-0.0607661	0.312018	-0.194752	0.845587	NA
ENSMUSG00000012211	TEX22	1.09177	0.491652	0.618172	0.795333	0.42642	NA
ENSMUSG00000012282	WNT8A	2.63994	0	0.652372	0	1	1
ENSMUSG00000012296	TJAP1	1185.28	-0.0698553	0.141798	-0.492639	0.622267	0.847225
ENSMUSG00000012350	EHF	4.09469	0.309544	0.550482	0.562315	0.573901	0.818628
ENSMUSG00000012396	NANOG	0.155927	-0.0491284	0.282173	-0.174107	0.861781	NA
ENSMUSG00000012405	RPL15	21217.7	-0.538825	0.202191	-2.66492	0.00770058	0.0648312
ENSMUSG00000012422	TMEM167	2085.18	-0.276269	0.216427	-1.2765	0.201778	0.504299
ENSMUSG00000012428	STEAP4	0.740818	-0.343142	0.500701	-0.685324	0.493139	NA
ENSMUSG00000012429	MPLKIP	1446.95	0.0803825	0.110028	0.730562	0.465047	0.749654
ENSMUSG00000012443	KIF11	3420.81	0.089877	0.413281	0.217472	0.827841	0.942666
ENSMUSG00000012483	RPA3	1127.55	-0.100801	0.22698	-0.444094	0.656974	0.86527
ENSMUSG00000012519	MLKL	185.351	0.685706	0.268566	2.55321	0.0106734	0.0815922
ENSMUSG00000012520	PHOX2B	0	NA	NA	NA	NA	NA
ENSMUSG00000012535	TNPO3	3997.06	-0.054424	0.130983	-0.415505	0.677773	0.876523
ENSMUSG00000012609	TTLL5	1147.02	0.113107	0.138215	0.818344	0.413161	0.711918
ENSMUSG00000012640	ZFP715	854.261	-0.0691217	0.20697	-0.33397	0.738402	0.904816
ENSMUSG00000012705	RETN	0.260854	-0.0491284	0.282173	-0.174107	0.861781	NA
ENSMUSG00000012777	ACPT	0.715989	-0.818782	0.542335	-1.50973	0.131111	NA
ENSMUSG00000012819	CDH23	738.135	0.262194	0.415595	0.630889	0.528113	0.791705
ENSMUSG00000012848	RPS5	32819.9	-0.395396	0.206132	-1.91817	0.0550893	0.238314
ENSMUSG00000012889	PODNL1	807.028	0.890295	0.243534	3.65573	0.000256449	0.0049841
ENSMUSG00000013033	ADGRL1	2730.92	1.55877	0.166595	9.35664	8.23091e-21	1.41572e-17
ENSMUSG00000013076	AMOTL1	10.0449	-0.964696	0.553557	-1.74272	0.0813825	0.301546
ENSMUSG00000013083	2200002J24RIK	0	NA	NA	NA	NA	NA
ENSMUSG00000013089	ETV5	5607.81	1.01313	0.310952	3.25817	0.00112135	0.0151987
ENSMUSG00000013091	TMEM190	0.100394	-0.0491284	0.282173	-0.174107	0.861781	NA
ENSMUSG00000013150	GFOD2	465.926	0.247738	0.15963	1.55196	0.120673	0.379231
ENSMUSG00000013155	ENKD1	464.838	0.131019	0.272176	0.481376	0.630249	0.851488
ENSMUSG00000013158	4933405L10RIK	3.19671	1.28542	0.649279	1.97977	0.0477297	0.218222
ENSMUSG00000013160	ATP6V0D1	3157.66	0.29049	0.201859	1.43907	0.15013	0.431092
ENSMUSG00000013236	PTPRS	6482.85	0.291309	0.185237	1.57263	0.115805	0.369976
ENSMUSG00000013275	SLC41A1	1326.74	-0.71452	0.262138	-2.72574	0.00641584	0.0569121
ENSMUSG00000013338	FER1L4	0.156653	0	0.282173	0	1	NA
ENSMUSG00000013353	4931406B18RIK	0	NA	NA	NA	NA	NA
ENSMUSG00000013367	IGLON5	0.0566444	0	0.282173	0	1	NA
ENSMUSG00000013415	IGF2BP1	0	NA	NA	NA	NA	NA
ENSMUSG00000013418	B4GALNT2	257.575	0.0324697	0.611807	0.0530718	0.957675	0.987174
ENSMUSG00000013419	ZFP651	42.5518	2.20325	0.375854	5.86198	4.57369e-09	5.674e-07
ENSMUSG00000013465	NELFB	3452.17	-0.0663766	0.129738	-0.511622	0.608916	0.840288
ENSMUSG00000013483	CARD14	4.93315	-0.195343	0.659246	-0.296313	0.766991	0.916765
ENSMUSG00000013495	TMEM175	733.104	-0.0598778	0.116038	-0.516019	0.605841	0.838332
ENSMUSG00000013523	BCAS1	29.4112	0.640838	0.564904	1.13442	0.256618	0.568107
ENSMUSG00000013539	TANGO2	432.016	-0.577151	0.155914	-3.70174	0.000214129	0.00429758
ENSMUSG00000013562	4833413E03RIK	2.79672	-0.597743	0.655978	-0.911223	0.362178	0.671712
ENSMUSG00000013584	ALDH1A2	0.55361	-0.0356657	0.424659	-0.0839867	0.933067	NA
ENSMUSG00000013593	NDUFS2	5954.88	0.117154	0.153746	0.762	0.44606	0.736369
ENSMUSG00000013611	SNX31	40.9838	-2.03727	0.537724	-3.78869	0.000151447	0.0033141
ENSMUSG00000013622	ATRAID	863.844	0.49002	0.160279	3.05729	0.00223347	0.0260093
ENSMUSG00000013629	CAD	8088.67	0.220966	0.220816	1.00068	0.316982	0.629717
ENSMUSG00000013643	LYPD8	0	NA	NA	NA	NA	NA
ENSMUSG00000013646	SH3BP5L	1139.96	0.0996585	0.145367	0.685567	0.492986	0.767859
ENSMUSG00000013653	1810065E05RIK	0.208256	0.0395501	0.282173	0.140163	0.888532	NA
ENSMUSG00000013662	ATAD1	3232.58	-0.237537	0.209882	-1.13176	0.257734	0.568786
ENSMUSG00000013663	PTEN	8516.03	-0.274355	0.26254	-1.045	0.296022	0.609925
ENSMUSG00000013668	4933402N03RIK	0	NA	NA	NA	NA	NA
ENSMUSG00000013698	PEA15A	832.48	1.13983	0.377463	3.01971	0.00253014	0.0284248
ENSMUSG00000013701	TIMM23	3330.94	-0.223571	0.163614	-1.36645	0.171797	0.461351
ENSMUSG00000013707	TNFAIP8L2	925.003	0.395409	0.403991	0.978756	0.327701	0.640378
ENSMUSG00000013736	TRNT1	1480.54	-0.354166	0.222823	-1.58945	0.111959	0.362761
ENSMUSG00000013766	LY6G6E	0	NA	NA	NA	NA	NA
ENSMUSG00000013787	EHMT2	8557.69	0.410596	0.154859	2.65142	0.00801543	0.0667306
ENSMUSG00000013822	ELOF1	1433.65	-0.230071	0.16911	-1.36048	0.173679	0.464079
ENSMUSG00000013833	MED16	1776.54	-0.172035	0.164635	-1.04495	0.296047	0.609925
ENSMUSG00000013846	ST3GAL1	5867.69	0.210742	0.206021	1.02291	0.306348	0.620381
ENSMUSG00000013858	TMEM259	2853.59	-0.064245	0.187681	-0.34231	0.732118	0.902589
ENSMUSG00000013878	RNF170	594.342	-0.168605	0.23372	-0.721395	0.470667	0.752755
ENSMUSG00000013921	CLIP3	10.3057	-0.765043	0.633736	-1.20719	0.227357	0.535684
ENSMUSG00000013928	THAP8	3.55683	0.449744	0.672309	0.668954	0.503525	0.774238
ENSMUSG00000013936	MYL2	0	NA	NA	NA	NA	NA
ENSMUSG00000013973	DEDD	1385.6	0.217673	0.125859	1.7295	0.0837197	0.30677
ENSMUSG00000013974	MCEMP1	1.59185	1.06113	0.665245	1.59509	0.110691	NA
ENSMUSG00000013997	NIT1	1253.82	0.227777	0.128929	1.76669	0.0772805	0.292834
ENSMUSG00000014030	PAX5	0.195238	-0.00478913	0.282173	-0.0169723	0.986459	NA
ENSMUSG00000014039	PRDM15	1034.04	-0.0816229	0.13786	-0.592071	0.553803	0.807909
ENSMUSG00000014074	RNF168	1569.84	-0.0284258	0.220722	-0.128785	0.897528	0.966231
ENSMUSG00000014075	TCTEX1D2	131.335	-0.0991392	0.292646	-0.338769	0.734784	0.903426
ENSMUSG00000014077	CHP1	4112.19	0.0110104	0.130295	0.0845034	0.932656	0.978048
ENSMUSG00000014104	SVAL2	0	NA	NA	NA	NA	NA
ENSMUSG00000014158	TRPV4	22.1342	-0.0781398	0.528258	-0.14792	0.882406	0.960911
ENSMUSG00000014164	KLHL3	142.861	-0.300063	0.247052	-1.21457	0.224528	0.53238
ENSMUSG00000014177	TVP23B	668.383	0.181677	0.166193	1.09317	0.27432	0.587
ENSMUSG00000014195	DNAJC7	7039.4	-0.053855	0.106982	-0.503404	0.61468	0.842766
ENSMUSG00000014198	ZFP385C	0.9576	-0.707415	0.538258	-1.31427	0.188756	NA
ENSMUSG00000014226	CACYBP	3490.17	-0.324813	0.236081	-1.37586	0.168866	0.45696
ENSMUSG00000014232	CLUAP1	1081.42	-0.109545	0.118094	-0.927605	0.353612	0.663698
ENSMUSG00000014243	ZSWIM7	155.162	0.520585	0.23603	2.20559	0.0274124	0.153531
ENSMUSG00000014245	PIGL	333.885	-0.369963	0.121574	-3.04311	0.00234143	0.0269202
ENSMUSG00000014294	NDUFA2	1365.99	-0.40314	0.215425	-1.87137	0.0612939	0.254991
ENSMUSG00000014301	PAM16	233.824	-0.406258	0.228524	-1.77775	0.0754447	0.28865
ENSMUSG00000014303	GLIS2	256.853	0.455049	0.265252	1.71553	0.0862474	0.312636
ENSMUSG00000014313	COX6C	4049.39	-0.427438	0.166233	-2.57132	0.0101313	0.0787429
ENSMUSG00000014329	BICC1	0.222427	0.0398082	0.283048	0.140641	0.888153	NA
ENSMUSG00000014349	UBE2Z	3203.71	0.0346782	0.121106	0.286345	0.774614	0.919677
ENSMUSG00000014351	GIP	0	NA	NA	NA	NA	NA
ENSMUSG00000014353	TMEM87B	399.74	-0.113949	0.242244	-0.470391	0.638076	0.855543
ENSMUSG00000014355	ANAPC1	7264.04	-0.0989772	0.108329	-0.913671	0.36089	0.670335
ENSMUSG00000014361	MERTK	10.7616	0.523837	0.535548	0.978133	0.328009	0.640378
ENSMUSG00000014402	TSG101	2545.19	-0.120944	0.103321	-1.17057	0.241774	0.552441
ENSMUSG00000014418	HPS5	1197.1	0.0513738	0.155353	0.330691	0.740878	0.905693
ENSMUSG00000014426	MAP3K4	1551.01	0.366489	0.120894	3.03149	0.00243348	0.0276094
ENSMUSG00000014444	PIEZO1	2397.35	-0.0726016	0.175155	-0.414499	0.678508	0.876942
ENSMUSG00000014453	BLK	1805.11	0.660466	0.295279	2.23675	0.0253026	0.14566
ENSMUSG00000014470	RNF166	3819.25	0.111089	0.221183	0.502251	0.615491	0.843001
ENSMUSG00000014496	ANKRD28	3344.81	-0.00828413	0.202123	-0.0409855	0.967307	0.989378
ENSMUSG00000014498	ANKRD52	4611.48	0.163272	0.174195	0.937296	0.348606	0.659194
ENSMUSG00000014503	PKD2L2	13.7381	0.231193	0.458502	0.504235	0.614096	0.842431
ENSMUSG00000014504	SRP19	1256.02	-0.34956	0.182845	-1.91178	0.0559038	0.240146
ENSMUSG00000014529	TMBIM7	2.61957	0.480405	0.671895	0.715	0.474609	0.755299
ENSMUSG00000014542	CLEC4F	1.24721	-0.976359	0.587589	-1.66164	0.0965857	NA
ENSMUSG00000014543	KLRA17	0.096141	0	0.282173	0	1	NA
ENSMUSG00000014547	WDFY2	263.448	1.46951	0.232781	6.31283	2.73979e-10	5.05368e-08
ENSMUSG00000014550	RBSN	1211.1	0.205033	0.0992068	2.06672	0.0387602	0.191353
ENSMUSG00000014551	MRPS25	927.936	-0.444121	0.135734	-3.27199	0.00106793	0.0147065
ENSMUSG00000014554	DGUOK	1235.54	-0.495813	0.142007	-3.49147	0.000480378	0.00798623
ENSMUSG00000014592	CAMTA1	306.886	0.153834	0.149797	1.02695	0.304445	0.618464
ENSMUSG00000014599	CSF1	10.3996	1.20188	0.652537	1.84186	0.0654959	0.265879
ENSMUSG00000014601	STRIP1	2140.17	0.0953201	0.166842	0.571318	0.567784	0.814997
ENSMUSG00000014602	KIF1A	3.20957	0.55881	0.601426	0.929141	0.352816	0.662927
ENSMUSG00000014603	ALX3	0.142536	0	0.282173	0	1	NA
ENSMUSG00000014606	SLC25A11	2952.86	-0.0629915	0.159321	-0.395375	0.692566	0.883792
ENSMUSG00000014609	CHRNE	2.71361	0.446146	0.649909	0.686475	0.492414	0.767444
ENSMUSG00000014633	CMC2	689.47	-0.271293	0.221428	-1.2252	0.220499	0.527994
ENSMUSG00000014668	CHFR	2983.88	0.121199	0.122627	0.988351	0.322981	0.635251
ENSMUSG00000014686	CEACAM16	8.20158	-1.78759	0.661244	-2.70338	0.0068639	0.0598373
ENSMUSG00000014704	HOXA2	0.841362	0.205528	0.603881	0.340345	0.733597	NA
ENSMUSG00000014725	ADAM28	0.208787	0	0.282173	0	1	NA
ENSMUSG00000014747	ANKRD53	0.0563155	0	0.282173	0	1	NA
ENSMUSG00000014748	TEX261	3469.85	-0.115104	0.0972061	-1.18413	0.236363	0.544601
ENSMUSG00000014763	FAM120B	1499.76	-0.0781785	0.0990034	-0.789654	0.42973	0.724226
ENSMUSG00000014767	TBP	1358.6	-0.199246	0.113108	-1.76155	0.0781461	0.294663
ENSMUSG00000014769	PSMB1	6285.99	-0.143121	0.138523	-1.0332	0.301512	0.615476
ENSMUSG00000014771	PDCD2	1342.34	0.104996	0.119858	0.876005	0.381027	0.688192
ENSMUSG00000014773	DLL1	3.14548	2.29711	0.655007	3.507	0.000453198	0.00766229
ENSMUSG00000014776	NOL3	19.6438	-1.54216	0.463223	-3.3292	0.000870948	0.0125463
ENSMUSG00000014778	FHOD1	820.836	0.337637	0.197687	1.70794	0.0876477	0.315495
ENSMUSG00000014782	PLEKHG4	17.6223	-1.32309	0.520825	-2.54037	0.0110737	0.0838132
ENSMUSG00000014786	SLC9A5	128.732	0.47178	0.255421	1.84707	0.0647371	0.264153
ENSMUSG00000014791	ELMO3	92.9844	-0.461882	0.30495	-1.51462	0.129869	0.395977
ENSMUSG00000014813	STC1	115.307	1.53432	0.543599	2.82253	0.00476471	0.0456817
ENSMUSG00000014837	4931428F04RIK	724.897	0.81403	0.131551	6.18794	6.09539e-10	1.03669e-07
ENSMUSG00000014846	TPPP3	3.59113	-0.185206	0.622034	-0.297742	0.7659	0.916098
ENSMUSG00000014850	MSH3	1253.64	-0.103914	0.210809	-0.492928	0.622063	0.847156
ENSMUSG00000014852	ADAMTS13	1.72015	0.0140634	0.288334	0.0487746	NA	NA
ENSMUSG00000014856	TMEM208	971.916	-0.26981	0.188786	-1.42918	0.152952	0.435053
ENSMUSG00000014859	E2F4	5010.41	-0.450119	0.172977	-2.60219	0.00926305	0.0740699
ENSMUSG00000014867	SURF4	8902.84	-0.0534807	0.118494	-0.451336	0.651748	0.862646
ENSMUSG00000014873	SURF2	1121.99	-0.375336	0.136976	-2.74015	0.00614107	0.0550998
ENSMUSG00000014905	DNAJB9	870.165	-0.535638	0.209356	-2.55851	0.0105123	0.0805752
ENSMUSG00000014907	NAF1	1221.35	-0.168336	0.223444	-0.753369	0.451228	0.740175
ENSMUSG00000014932	YES1	3.41577	1.28863	0.671286	1.91964	0.0549037	0.237925
ENSMUSG00000014956	PPP1CB	6368.53	-0.0655497	0.249453	-0.262774	0.792725	0.927795
ENSMUSG00000014959	GORASP2	4294.04	-0.190519	0.12303	-1.54856	0.121488	0.380434
ENSMUSG00000014980	TSEN15	350.525	-0.698569	0.152906	-4.56863	4.90932e-06	0.00020201
ENSMUSG00000015001	OC90	0	NA	NA	NA	NA	NA
ENSMUSG00000015002	EFR3A	3639.88	-0.463391	0.204607	-2.26478	0.023526	0.139198
ENSMUSG00000015013	TRAPPC2L	599.685	-0.0286715	0.203478	-0.140907	0.887943	0.962088
ENSMUSG00000015016	ACSF3	520.397	-0.876336	0.181753	-4.82158	1.42428e-06	7.40108e-05
ENSMUSG00000015023	DDX19A	5676.49	0.33319	0.146826	2.26928	0.0232511	0.138046
ENSMUSG00000015027	GALNS	988.947	-0.322666	0.197731	-1.63185	0.102712	0.345304
ENSMUSG00000015053	GATA2	3.79055	-0.780873	0.658108	-1.18654	0.235408	0.543823
ENSMUSG00000015083	C8G	63.6589	0.564094	0.295037	1.91195	0.0558832	0.240118
ENSMUSG00000015085	ENTPD2	0.544191	-0.37449	0.476178	-0.78645	0.431604	NA
ENSMUSG00000015087	RABL6	2562.53	-0.111479	0.135462	-0.822958	0.410532	0.71002
ENSMUSG00000015090	PTGDS	2.27652	0.591093	0.671191	0.880664	0.3785	0.686078
ENSMUSG00000015092	EDF1	3586.31	-0.37535	0.184818	-2.03092	0.0422629	0.202372
ENSMUSG00000015093	CLIC3	2.39541	0.0568707	0.671869	0.0846455	0.932543	0.978048
ENSMUSG00000015094	NPDC1	8.78389	-0.874454	0.583578	-1.49843	0.13402	0.403778
ENSMUSG00000015095	FBXW5	1824.25	-0.167074	0.155149	-1.07686	0.281542	0.595196
ENSMUSG00000015112	SLC25A13	561.821	-0.481217	0.159128	-3.02408	0.00249392	0.0281651
ENSMUSG00000015120	UBE2I	8362.93	-0.311174	0.0595065	-5.22925	1.70203e-07	1.19979e-05
ENSMUSG00000015126	TSR3	952.387	-0.14463	0.164889	-0.877135	0.380413	0.68756
ENSMUSG00000015127	UNKL	2096.58	-0.26043	0.16816	-1.54871	0.121452	0.380434
ENSMUSG00000015133	LRRK1	34.4651	0.377966	0.491825	0.768498	0.442192	0.733251
ENSMUSG00000015134	ALDH1A3	3.38408	0.0934273	0.658027	0.141981	0.887095	0.962045
ENSMUSG00000015143	ACTN1	10901.3	-0.453688	0.161583	-2.80776	0.00498869	0.0472237
ENSMUSG00000015149	SIRT2	2748.66	0.23728	0.195593	1.21313	0.22508	0.532822
ENSMUSG00000015165	HNRNPL	17087.8	-0.0102262	0.100703	-0.101548	0.919115	0.973507
ENSMUSG00000015176	NOLC1	6737.08	-0.193103	0.227668	-0.848179	0.396338	0.699486
ENSMUSG00000015189	CASD1	1208.11	-0.363412	0.210964	-1.72263	0.0849559	0.309979
ENSMUSG00000015202	CNKSR3	593.195	1.12514	0.258798	4.34754	1.37671e-05	0.00048227
ENSMUSG00000015214	MTMR1	1823.06	-0.0791024	0.185253	-0.426996	0.669382	0.872063
ENSMUSG00000015217	HMGB3	2278.23	0.460271	0.247211	1.86185	0.0626237	0.258272
ENSMUSG00000015222	MAP2	23.7644	1.39352	0.613395	2.27182	0.0230974	0.137669
ENSMUSG00000015224	CYP2J9	138.148	-0.818197	0.295757	-2.76645	0.00566698	0.0518005
ENSMUSG00000015242	NIPSNAP3A	0	NA	NA	NA	NA	NA
ENSMUSG00000015243	ABCA1	609.989	1.46941	0.462832	3.17483	0.00149925	0.0190875
ENSMUSG00000015247	NIPSNAP3B	931.432	0.199325	0.142364	1.4001	0.161482	0.44618
ENSMUSG00000015289	LAGE3	1043.34	0.0188938	0.171301	0.110296	0.912175	0.970819
ENSMUSG00000015290	UBL4A	1662.31	-0.123868	0.140789	-0.879814	0.37896	0.686221
ENSMUSG00000015291	GDI1	2593.8	-0.116708	0.188042	-0.620647	0.534832	0.795199
ENSMUSG00000015305	SASH1	63.7489	0.480029	0.354597	1.35373	0.175822	0.467944
ENSMUSG00000015312	GADD45B	231.471	1.5948	0.30168	5.2864	1.2475e-07	9.16965e-06
ENSMUSG00000015314	SLAMF6	4748.72	-0.558205	0.25947	-2.15133	0.0314501	0.167838
ENSMUSG00000015316	SLAMF1	284.755	-1.57017	0.364852	-4.30358	1.68063e-05	0.000576984
ENSMUSG00000015335	ZDHHC12	331.67	-0.0893536	0.198552	-0.450026	0.652692	0.863031
ENSMUSG00000015337	ENDOG	210.322	-0.269781	0.255759	-1.05482	0.291506	0.605722
ENSMUSG00000015340	CYBB	33.2054	0.736187	0.39174	1.87928	0.0602069	0.252022
ENSMUSG00000015341	GOLGA7	3133.3	-0.104058	0.106977	-0.972712	0.330696	0.643072
ENSMUSG00000015342	XK	382.906	-0.0141232	0.285542	-0.0494608	0.960552	0.988499
ENSMUSG00000015354	PCOLCE2	0.138236	0	0.282173	0	1	NA
ENSMUSG00000015355	CD48	4310.48	-0.389082	0.221018	-1.76041	0.0783386	0.29497
ENSMUSG00000015357	CLPX	1474.84	-0.0085875	0.142013	-0.0604698	0.951781	0.985194
ENSMUSG00000015363	TRABD	2460.67	-0.455915	0.157972	-2.88605	0.00390107	0.0392388
ENSMUSG00000015365	MOV10L1	0	NA	NA	NA	NA	NA
ENSMUSG00000015377	DENND6B	281.497	0.281594	0.247318	1.13859	0.254873	0.567337
ENSMUSG00000015396	CD83	51.6602	0.725851	0.353056	2.05591	0.0397915	0.194657
ENSMUSG00000015401	TMEM27	0.115188	0	0.282173	0	1	NA
ENSMUSG00000015405	ACE2	0.0307238	0	0.282173	0	1	NA
ENSMUSG00000015437	GZMB	187.485	2.52172	0.672494	3.7498	0.000176978	0.00371194
ENSMUSG00000015441	GZMF	0	NA	NA	NA	NA	NA
ENSMUSG00000015443	GZMN	0	NA	NA	NA	NA	NA
ENSMUSG00000015451	C4A	11.9955	0.171306	0.470832	0.363838	0.715979	0.895092
ENSMUSG00000015452	AGER	58.9613	0.925215	0.31625	2.92558	0.00343814	0.0357102
ENSMUSG00000015461	ATF6B	3100.13	-0.0288511	0.174088	-0.165727	0.868372	0.955772
ENSMUSG00000015467	EGFL8	42.0377	-0.325896	0.305062	-1.06829	0.285388	0.599715
ENSMUSG00000015468	NOTCH4	25.6608	0.844465	0.355731	2.37388	0.0176021	0.115366
ENSMUSG00000015474	PPT2	2394.43	0.0570396	0.190997	0.298642	0.765213	0.915697
ENSMUSG00000015476	PRRT1	1726.17	-0.56969	0.260926	-2.18334	0.0290104	0.159215
ENSMUSG00000015478	RNF5	1292.93	-0.0279845	0.108643	-0.257581	0.79673	0.929046
ENSMUSG00000015484	FAM163A	0	NA	NA	NA	NA	NA
ENSMUSG00000015488	CACFD1	1407.49	-0.277734	0.125275	-2.21699	0.0266236	0.150337
ENSMUSG00000015501	HIVEP2	5278.75	-0.196582	0.184448	-1.06578	0.286522	0.600749
ENSMUSG00000015519	2310057J18RIK	0	NA	NA	NA	NA	NA
ENSMUSG00000015522	ARNT	2019.66	0.0773126	0.126575	0.610806	0.541328	0.799832
ENSMUSG00000015533	ITGA2	121.159	0.200898	0.563463	0.356543	0.721434	0.897878
ENSMUSG00000015536	MOCS2	780.521	-0.0704686	0.200666	-0.351173	0.725458	0.90028
ENSMUSG00000015542	NAT9	276.907	-0.332326	0.187939	-1.76826	0.0770173	0.292557
ENSMUSG00000015568	LPL	15.0083	0.48338	0.447271	1.08073	0.279817	0.593446
ENSMUSG00000015575	ATP6V0E	2622.97	0.0747679	0.169996	0.439822	0.660066	0.866804
ENSMUSG00000015579	NKX2-5	0.343196	0.29782	0.282419	1.05453	0.291639	NA
ENSMUSG00000015597	ZFP318	991.93	0.907818	0.258868	3.50687	0.00045341	0.00766229
ENSMUSG00000015599	TTBK1	2.812	0.496244	0.672215	0.738222	0.460379	0.746718
ENSMUSG00000015605	SRF	3057.22	-0.126118	0.184261	-0.684454	0.493689	0.76804
ENSMUSG00000015619	GATA3	6978.11	0.575831	0.155739	3.6974	0.000217821	0.00435642
ENSMUSG00000015627	GATA5	0	NA	NA	NA	NA	NA
ENSMUSG00000015647	LAMA5	17.4617	2.50643	0.5851	4.28377	1.83751e-05	0.000619711
ENSMUSG00000015652	STEAP1	0	NA	NA	NA	NA	NA
ENSMUSG00000015653	STEAP2	0.0269766	0	0.282173	0	1	NA
ENSMUSG00000015656	HSPA8	92504.7	-0.421492	0.219138	-1.92341	0.0544289	0.236887
ENSMUSG00000015659	SERAC1	142.61	-0.451881	0.240123	-1.88187	0.0598534	0.250992
ENSMUSG00000015665	AWAT1	0.0309578	0.0395501	0.282173	0.140163	0.888532	NA
ENSMUSG00000015668	PDZD11	862.351	-0.131935	0.168084	-0.784937	0.432491	0.726108
ENSMUSG00000015671	PSMA2	6057.08	-0.154997	0.156767	-0.988707	0.322807	0.635061
ENSMUSG00000015672	MRPL32	1088.1	-0.114879	0.13675	-0.840066	0.400872	0.70223
ENSMUSG00000015697	SETDB1	3679	0.15152	0.101629	1.49092	0.135983	0.407334
ENSMUSG00000015702	ANXA9	69.556	-0.741969	0.237971	-3.11789	0.00182151	0.0222989
ENSMUSG00000015709	ARNT2	67.1094	-0.643071	0.45501	-1.41331	0.157564	0.440954
ENSMUSG00000015711	PRUNE1	1167.76	0.595895	0.157497	3.78353	0.000154621	0.00336643
ENSMUSG00000015714	CERS2	4227.3	-0.0695957	0.0864575	-0.80497	0.420837	0.718514
ENSMUSG00000015721	NLRP5	0	NA	NA	NA	NA	NA
ENSMUSG00000015733	CAPZA2	6080.97	-0.000525292	0.234286	-0.0022421	0.998211	1
ENSMUSG00000015745	PLEKHO1	1916.57	-0.180176	0.260253	-0.692312	0.488741	0.764223
ENSMUSG00000015747	VPS45	1011.91	0.115692	0.132193	0.875177	0.381478	0.688529
ENSMUSG00000015748	PRPF3	1784.31	-0.214728	0.143106	-1.50048	0.133489	0.402739
ENSMUSG00000015749	ANP32E	17391.3	0.0546909	0.254014	0.215307	0.829528	0.943517
ENSMUSG00000015750	APH1A	3005.22	-0.0586608	0.157949	-0.37139	0.710347	0.893117
ENSMUSG00000015755	TAB2	4987.52	-0.160956	0.157191	-1.02395	0.30586	0.619718
ENSMUSG00000015757	PPIL4	1712.08	-0.130811	0.226174	-0.578363	0.563019	0.811315
ENSMUSG00000015759	CNIH1	2118.11	-0.115292	0.122859	-0.938406	0.348036	0.658741
ENSMUSG00000015766	EPS8	25.9814	1.62771	0.545824	2.98212	0.0028626	0.0311427
ENSMUSG00000015776	MED22	2985.54	0.133791	0.144145	0.928172	0.353319	0.663364
ENSMUSG00000015787	ABO	0.0553283	0	0.282173	0	1	NA
ENSMUSG00000015790	SURF1	1352.11	0.0275604	0.166531	0.165497	0.868553	0.955772
ENSMUSG00000015804	MED28	1854.73	-0.217957	0.153518	-1.41975	0.155682	0.438744
ENSMUSG00000015806	QDPR	2170.68	0.165519	0.159301	1.03903	0.298789	0.612901
ENSMUSG00000015812	GNRH1	4.84238	0.463439	0.639472	0.724722	0.468623	0.752192
ENSMUSG00000015829	TNR	33.9635	-1.89783	0.657119	-2.88812	0.00387558	0.0391197
ENSMUSG00000015837	SQSTM1	7851.17	-0.351113	0.188335	-1.8643	0.0622799	0.257416
ENSMUSG00000015839	NFE2L2	1936.29	0.212591	0.176171	1.20673	0.227536	0.535893
ENSMUSG00000015843	RXRG	23.0587	-1.13975	0.609572	-1.86975	0.0615191	0.255525
ENSMUSG00000015846	RXRA	585.452	0.681252	0.398159	1.71101	0.0870797	0.313998
ENSMUSG00000015850	ADAMTSL4	6.90159	-0.223871	0.646853	-0.346093	0.729273	0.901197
ENSMUSG00000015852	FCRLS	0.58378	0	0.387065	0	1	NA
ENSMUSG00000015854	CD5L	6.73028	1.30524	0.642812	2.03052	0.0423041	0.202435
ENSMUSG00000015869	PRPSAP1	2191.94	0.400016	0.130207	3.07215	0.00212523	0.0251058
ENSMUSG00000015879	FAM184B	20.8861	0.0813027	0.608993	0.133504	0.893795	0.964674
ENSMUSG00000015880	NCAPG	1351.02	-0.1596	0.427504	-0.37333	0.708903	0.89242
ENSMUSG00000015882	LCORL	612.069	0.291913	0.373254	0.782075	0.43417	0.727494
ENSMUSG00000015889	LTA4H	11304.6	-0.177294	0.147077	-1.20545	0.228028	0.536463
ENSMUSG00000015890	AMDHD1	2.96118	-0.820293	0.670835	-1.22279	0.221408	0.529065
ENSMUSG00000015932	DSTN	910.11	-0.175313	0.253293	-0.692137	0.488852	0.764317
ENSMUSG00000015937	H2AFY	19779.7	0.118049	0.110485	1.06846	0.285312	0.599714
ENSMUSG00000015942	GTF2IRD2	546.377	-0.0809347	0.171202	-0.472745	0.636395	0.854756
ENSMUSG00000015943	BOLA1	504.356	0.0576324	0.225585	0.25548	0.798353	0.929733
ENSMUSG00000015944	GATSL2	1364.57	0.87142	0.225813	3.85904	0.000113835	0.00266751
ENSMUSG00000015947	FCGR1	7.20907	0.79166	0.589596	1.34271	0.179364	0.473388
ENSMUSG00000015950	NCF1	246.579	-0.717109	0.483127	-1.48431	0.137728	0.41013
ENSMUSG00000015957	WNT11	0.253631	0.0395501	0.282173	0.140163	0.888532	NA
ENSMUSG00000015961	ADSS	5304.67	-0.0566918	0.154355	-0.367281	0.713409	0.893971
ENSMUSG00000015962	1700016C15RIK	0	NA	NA	NA	NA	NA
ENSMUSG00000015966	IL17RB	3114.92	0.0372434	0.223097	0.166938	0.867419	0.955466
ENSMUSG00000015968	CACNA1D	18.9215	-0.293503	0.408468	-0.718548	0.47242	0.753412
ENSMUSG00000015970	CHDH	6986.05	-0.0516764	0.160365	-0.322242	0.747269	0.907992
ENSMUSG00000015971	ACTR8	1328.63	-0.114655	0.0991005	-1.15696	0.24729	0.558485
ENSMUSG00000015980	LRRC27	56.0564	-0.352814	0.365248	-0.965957	0.334066	0.646538
ENSMUSG00000015981	STK32C	13.5648	0.461562	0.545809	0.845647	0.39775	0.700092
ENSMUSG00000015994	FNTA	2452.19	0.205844	0.116126	1.77258	0.0762977	0.290851
ENSMUSG00000016018	SKIV2L2	3826.89	-0.174069	0.196635	-0.88524	0.376027	0.684752
ENSMUSG00000016024	LBP	37.2704	1.23024	0.527563	2.33193	0.0197045	0.123873
ENSMUSG00000016028	CELSR1	6627.88	0.0486779	0.240797	0.202153	0.839797	0.946764
ENSMUSG00000016087	FLI1	3663.69	0.251248	0.156001	1.61056	0.107276	0.354089
ENSMUSG00000016128	STARD13	5.58466	-1.37548	0.618941	-2.22232	0.0262619	0.149028
ENSMUSG00000016150	TENM1	547.308	-2.19777	0.628006	-3.4996	0.000465951	0.00781888
ENSMUSG00000016179	CAMK1G	19.998	-2.96983	0.646722	-4.59212	4.38764e-06	0.00018588
ENSMUSG00000016181	DIEXF	2578.51	-0.00576911	0.170039	-0.0339281	0.972934	0.991378
ENSMUSG00000016194	HSD11B1	986.563	-0.456245	0.267237	-1.70727	0.0877724	0.315559
ENSMUSG00000016200	SYT14	83.5503	-3.36526	0.549709	-6.12189	9.24701e-10	1.43287e-07
ENSMUSG00000016206	H2-M3	751.11	0.0515941	0.251588	0.205074	0.837514	0.946308
ENSMUSG00000016239	LONRF3	20.5997	0.55155	0.456701	1.20768	0.227169	0.535549
ENSMUSG00000016252	ATP5E	3380.4	-0.200428	0.22025	-0.910001	0.362822	0.672617
ENSMUSG00000016253	NELFCD	2141.76	0.0785119	0.116537	0.673708	0.500497	0.771837
ENSMUSG00000016255	TUBB1	0.155053	-0.137807	0.282173	-0.488377	0.625283	NA
ENSMUSG00000016256	CTSZ	1790.35	-0.0909056	0.19442	-0.467573	0.64009	0.856374
ENSMUSG00000016257	PRELID3B	2034.64	0.0129884	0.162838	0.0797627	0.936426	0.978585
ENSMUSG00000016262	SERTAD4	10.3145	-2.5425	0.662586	-3.83724	0.000124426	0.00286692
ENSMUSG00000016283	H2-M2	13.0833	0.532111	0.509243	1.0449	0.296067	0.609925
ENSMUSG00000016308	UBE2A	1704.81	-0.183765	0.140012	-1.31249	0.189355	0.487926
ENSMUSG00000016319	SLC25A5	19825.4	-0.0973789	0.14653	-0.664566	0.506328	0.777021
ENSMUSG00000016327	ATP1B4	0	NA	NA	NA	NA	NA
ENSMUSG00000016344	PPDPF	2161.56	-0.199117	0.211439	-0.941722	0.346335	0.656704
ENSMUSG00000016346	KCNQ2	0.358886	0.0487819	0.311607	0.156549	0.8756	NA
ENSMUSG00000016349	EEF1A2	0	NA	NA	NA	NA	NA
ENSMUSG00000016356	COL20A1	38.6416	-0.374231	0.313775	-1.19267	0.232998	0.54193
ENSMUSG00000016382	PLS3	64.9302	1.0762	0.393702	2.73353	0.00626593	0.055972
ENSMUSG00000016386	MPPED2	16.6501	0.859555	0.564088	1.5238	0.12756	0.391791
ENSMUSG00000016409	NKAP	1038.81	-0.111932	0.199821	-0.56016	0.57537	0.819305
ENSMUSG00000016427	NDUFA1	1372.85	0.09452	0.186547	0.506681	0.612379	0.842006
ENSMUSG00000016458	WT1	0.712718	0.287835	0.31133	0.924535	0.355208	NA
ENSMUSG00000016477	E2F3	1298.62	0.00415532	0.192585	0.0215765	0.982786	0.99511
ENSMUSG00000016481	CR1L	2664.57	0.203192	0.0850366	2.38947	0.0168729	0.111965
ENSMUSG00000016487	PPFIBP1	171.691	-0.502152	0.326396	-1.53848	0.123932	0.385118
ENSMUSG00000016493	CD46	67.4873	0.20434	0.463582	0.440785	0.659368	0.866448
ENSMUSG00000016494	CD34	15.6824	0.0925636	0.542277	0.170694	0.864464	0.95409
ENSMUSG00000016495	PLGRKT	1463.08	-0.782566	0.169388	-4.61997	3.83802e-06	0.000167548
ENSMUSG00000016496	CD274	697.986	0.431502	0.246415	1.75112	0.0799254	0.298527
ENSMUSG00000016498	PDCD1LG2	165.328	0.771962	0.343406	2.24796	0.0245788	0.143146
ENSMUSG00000016503	GTF3A	2713.57	-0.213344	0.146954	-1.45177	0.146565	0.425452
ENSMUSG00000016510	MTIF3	782.976	-0.192869	0.170242	-1.13291	0.25725	0.568626
ENSMUSG00000016520	LNX2	1395.35	-0.418996	0.155878	-2.68797	0.00718874	0.0616997
ENSMUSG00000016524	IL19	0.837846	0.534503	0.571521	0.935228	0.349671	NA
ENSMUSG00000016526	DYRK3	212.72	0.877697	0.294374	2.98157	0.00286776	0.0311594
ENSMUSG00000016528	MAPKAPK2	6041.56	0.561964	0.197287	2.84846	0.00439314	0.0432277
ENSMUSG00000016529	IL10	5.02458	-1.11273	0.652234	-1.70603	0.0880016	0.316063
ENSMUSG00000016534	LAMP2	3212.02	-0.71874	0.187047	-3.84256	0.000121758	0.00282243
ENSMUSG00000016541	ATXN10	5327.1	-0.398987	0.13725	-2.907	0.00364912	0.0376063
ENSMUSG00000016552	FOXRED2	1214.2	0.146334	0.203986	0.717373	0.473144	0.754136
ENSMUSG00000016554	EIF3D	10258	-0.319487	0.168195	-1.8995	0.057499	0.244919
ENSMUSG00000016559	H3F3B	22858.4	0.178667	0.110325	1.61946	0.105348	0.350142
ENSMUSG00000016619	NUP50	4827.89	-0.0690046	0.110286	-0.625689	0.531519	0.793449
ENSMUSG00000016624	PHF21B	14.472	0.431324	0.416237	1.03625	0.300087	0.613996
ENSMUSG00000016626	NLRP14	0	NA	NA	NA	NA	NA
ENSMUSG00000016637	IFT27	716.856	-0.365723	0.218934	-1.67047	0.0948262	0.33003
ENSMUSG00000016664	PACSIN2	617.947	-1.14375	0.310582	-3.68261	0.000230857	0.00459045
ENSMUSG00000016756	CMAH	5193.83	0.702174	0.394097	1.78173	0.0747937	0.287128
ENSMUSG00000016757	TTLL12	4435.1	-0.567941	0.170174	-3.33742	0.0008456	0.0123057
ENSMUSG00000016758	BIK	4.71169	-0.341814	0.619968	-0.551341	0.5814	0.823462
ENSMUSG00000016763	SCUBE1	5.98334	-0.327062	0.654897	-0.49941	0.61749	0.844196
ENSMUSG00000016831	TOX4	6220.63	0.0275917	0.101629	0.271493	0.786012	0.924273
ENSMUSG00000016833	MRPS18C	1083.84	-0.0596614	0.213079	-0.279996	0.779481	0.921311
ENSMUSG00000016918	SULF1	2.7338	0.444278	0.671145	0.66197	0.50799	0.777622
ENSMUSG00000016921	SRSF6	9988.36	-0.537991	0.127194	-4.22969	2.34018e-05	0.000748163
ENSMUSG00000016933	PLCG1	11859.8	-0.146724	0.184385	-0.795745	0.42618	0.7217
ENSMUSG00000016940	KCTD2	1247.7	-0.0401064	0.149668	-0.267969	0.788724	0.92571
ENSMUSG00000016942	TMPRSS6	0.150825	0	0.282173	0	1	NA
ENSMUSG00000016946	KCTD5	1145.88	-0.030327	0.0898627	-0.337481	0.735754	0.903862
ENSMUSG00000016982	POM121L2	0.0422322	0	0.282173	0	1	NA
ENSMUSG00000016984	ETAA1	789.377	-0.194072	0.288671	-0.672295	0.501396	0.772623
ENSMUSG00000016995	MATN4	0	NA	NA	NA	NA	NA
ENSMUSG00000016998	SVS4	0	NA	NA	NA	NA	NA
ENSMUSG00000017000	SVS6	0	NA	NA	NA	NA	NA
ENSMUSG00000017002	SLPI	5.56214	1.00478	0.672225	1.4947	0.134993	0.405461
ENSMUSG00000017003	SVS3A	0	NA	NA	NA	NA	NA
ENSMUSG00000017004	SVS5	0	NA	NA	NA	NA	NA
ENSMUSG00000017007	RBPJL	0	NA	NA	NA	NA	NA
ENSMUSG00000017009	SDC4	90.9192	2.82827	0.474211	5.96417	2.45875e-09	3.24034e-07
ENSMUSG00000017049	CCDC70	0	NA	NA	NA	NA	NA
ENSMUSG00000017057	IL13RA1	6.24659	-0.0475101	0.520456	-0.0912855	0.927266	0.97556
ENSMUSG00000017064	PRL5A1	0	NA	NA	NA	NA	NA
ENSMUSG00000017119	NBR1	3310.23	-0.0907462	0.13762	-0.659398	0.50964	0.778857
ENSMUSG00000017132	CYTH1	5075.94	0.407498	0.20158	2.02152	0.0432263	0.205045
ENSMUSG00000017144	RND3	8.1959	0.255754	0.565411	0.452333	0.651029	0.862622
ENSMUSG00000017146	BRCA1	1024.5	-0.0119817	0.378863	-0.0316254	0.974771	0.992016
ENSMUSG00000017165	GAST	0	NA	NA	NA	NA	NA
ENSMUSG00000017167	CNTNAP1	943.478	2.10452	0.528166	3.98457	6.76022e-05	0.00178337
ENSMUSG00000017176	NT5C3B	2868.99	-0.0507603	0.197892	-0.256506	0.79756	0.929343
ENSMUSG00000017188	COA3	1235.03	-0.0875941	0.155987	-0.561549	0.574423	0.818897
ENSMUSG00000017195	ZPBP2	26.4396	0.0951113	0.466857	0.203727	0.838567	0.946476
ENSMUSG00000017204	GSDMA	0.0921922	0	0.282173	0	1	NA
ENSMUSG00000017210	MED24	5715.19	-0.032763	0.147303	-0.22242	0.823987	0.940341
ENSMUSG00000017211	GSDMA2	0	NA	NA	NA	NA	NA
ENSMUSG00000017221	PSMD3	7704.97	-0.0720703	0.148927	-0.483931	0.628435	0.850956
ENSMUSG00000017264	EXOSC10	5013.95	-0.170509	0.138412	-1.23189	0.217989	0.525026
ENSMUSG00000017286	GLOD4	3811.15	0.204385	0.13253	1.54218	0.123029	0.383559
ENSMUSG00000017288	VPS53	2055.42	-0.0629692	0.116703	-0.539569	0.589494	0.828982
ENSMUSG00000017291	TAOK1	2530.63	-0.0624446	0.30473	-0.204918	0.837636	0.946348
ENSMUSG00000017299	DNTTIP1	1427.76	-0.0515754	0.149841	-0.3442	0.730696	0.902197
ENSMUSG00000017300	TNNC2	0.365391	-0.0882795	0.370895	-0.238017	0.811868	NA
ENSMUSG00000017307	ACOT8	515.517	-0.228281	0.176031	-1.29683	0.194691	0.494755
ENSMUSG00000017309	CD300LG	0.237016	-0.0934676	0.282173	-0.331242	0.740462	NA
ENSMUSG00000017310	SPINT4	0	NA	NA	NA	NA	NA
ENSMUSG00000017311	PYY	0	NA	NA	NA	NA	NA
ENSMUSG00000017314	MPP2	17.4746	1.50082	0.625313	2.40011	0.0163902	0.109736
ENSMUSG00000017316	PPY	0	NA	NA	NA	NA	NA
ENSMUSG00000017344	VTN	0.140835	0	0.282173	0	1	NA
ENSMUSG00000017376	NLK	1412.88	-0.153513	0.208483	-0.736333	0.461528	0.747062
ENSMUSG00000017386	TRAF4	3237.18	0.326732	0.19366	1.68715	0.0915749	0.323329
ENSMUSG00000017390	ALDOC	127.954	-1.29585	0.269474	-4.80883	1.51816e-06	7.74849e-05
ENSMUSG00000017400	STAC2	4.87229	0.843324	0.670673	1.25743	0.208598	0.513068
ENSMUSG00000017404	RPL19	51370.2	-0.399741	0.185665	-2.15302	0.0313172	0.167508
ENSMUSG00000017405	NEK8	487.876	0.868131	0.201674	4.30462	1.67273e-05	0.000576867
ENSMUSG00000017412	CACNB4	1.1414	0.820627	0.600198	1.36726	0.171544	NA
ENSMUSG00000017417	PLXDC1	794.985	-1.16282	0.305391	-3.80765	0.000140292	0.00312163
ENSMUSG00000017418	ARL5B	1338.42	0.0571405	0.255215	0.223891	0.822842	0.939749
ENSMUSG00000017421	ZFP207	7587.69	-0.372977	0.135915	-2.74419	0.00606596	0.0546254
ENSMUSG00000017428	PSMD11	3977.81	0.0620217	0.0782717	0.792389	0.428134	0.723299
ENSMUSG00000017446	C1QTNF1	849.221	1.29113	0.584033	2.21071	0.0270556	0.151997
ENSMUSG00000017453	PIPOX	107.533	-0.472578	0.406962	-1.16123	0.245547	0.556444
ENSMUSG00000017466	TIMP2	3250.74	0.108442	0.233993	0.463442	0.643048	0.858009
ENSMUSG00000017478	ZC3H18	4895.7	-0.00283365	0.119696	-0.0236738	0.981113	0.994478
ENSMUSG00000017485	TOP2B	10875.2	-0.358367	0.246733	-1.45245	0.146376	0.425209
ENSMUSG00000017491	RARB	0.443207	0.311055	0.321976	0.966081	NA	NA
ENSMUSG00000017493	IGFBP4	16975.4	1.61402	0.582215	2.77221	0.00556775	0.0510204
ENSMUSG00000017499	CDC6	1884.5	-0.187994	0.338198	-0.555869	0.5783	0.821504
ENSMUSG00000017548	SUZ12	3736.94	-0.213273	0.305104	-0.699018	0.484541	0.761203
ENSMUSG00000017550	ATAD5	1641.22	-0.210546	0.335404	-0.627736	0.530177	0.792581
ENSMUSG00000017561	CRLF3	3974.27	-0.116437	0.135469	-0.859507	0.390061	0.695166
ENSMUSG00000017588	KRT27	0	NA	NA	NA	NA	NA
ENSMUSG00000017607	TNS4	113.923	0.622685	0.614403	1.01348	0.310831	0.625265
ENSMUSG00000017615	TNFAIP1	895.909	0.812827	0.132737	6.12359	9.14883e-10	1.43054e-07
ENSMUSG00000017631	ABR	7967	0.0692543	0.140557	0.492712	0.622216	0.847225
ENSMUSG00000017639	RAB11FIP4	2284.44	-0.542364	0.259152	-2.09284	0.0363636	0.183579
ENSMUSG00000017652	CD40	2.51468	1.68029	0.66419	2.52983	0.0114117	0.0854886
ENSMUSG00000017664	SLC35C2	1428.86	-0.0676189	0.216357	-0.312534	0.754634	0.910272
ENSMUSG00000017667	ZFP334	0.246541	0.0417955	0.289674	0.144284	0.885276	NA
ENSMUSG00000017670	ELMO2	1963.37	0.26915	0.137199	1.96175	0.0497912	0.223956
ENSMUSG00000017677	WSB1	1888.84	-0.239852	0.181381	-1.32236	0.186048	0.482762
ENSMUSG00000017679	TTPAL	2644.3	-0.450514	0.127766	-3.5261	0.000421729	0.00721583
ENSMUSG00000017686	RHOT1	1958.23	0.0333119	0.154182	0.216055	0.828945	0.943274
ENSMUSG00000017688	HNF4G	0	NA	NA	NA	NA	NA
ENSMUSG00000017692	RHBDL3	141.445	0.213127	0.468335	0.455073	0.649057	0.861425
ENSMUSG00000017697	ADA	1587.69	0.414192	0.258603	1.60165	0.109233	0.357936
ENSMUSG00000017707	SERINC3	28970.1	0.718277	0.191977	3.74148	0.000182938	0.00380475
ENSMUSG00000017713	THA1	157.417	0.746007	0.38962	1.9147	0.0555303	0.239274
ENSMUSG00000017715	PGS1	1509.44	-0.136359	0.126704	-1.07621	0.281835	0.59567
ENSMUSG00000017716	BIRC5	1566.74	0.221203	0.355818	0.621673	0.534157	0.794936
ENSMUSG00000017718	AFMID	419.155	0.767174	0.254442	3.01513	0.00256873	0.0287327
ENSMUSG00000017720	TRP53TG5	0	NA	NA	NA	NA	NA
ENSMUSG00000017721	PIGT	5325.72	0.288917	0.19837	1.45646	0.145266	0.422715
ENSMUSG00000017723	WFDC2	4.29549	0.0184988	0.290441	0.0636922	NA	NA
ENSMUSG00000017724	ETV4	74.6474	1.91356	0.557719	3.43105	0.000601252	0.00946659
ENSMUSG00000017733	EPPIN	0	NA	NA	NA	NA	NA
ENSMUSG00000017734	DBNDD2	19.6302	0.446862	0.650724	0.686715	0.492262	0.767333
ENSMUSG00000017737	MMP9	198.987	2.57461	0.657429	3.91618	8.99633e-05	0.00221686
ENSMUSG00000017740	SLC12A5	2.07506	-0.302733	0.668657	-0.452748	0.65073	NA
ENSMUSG00000017747	GHDC	158.234	0.0581225	0.294162	0.197586	0.843369	0.948016
ENSMUSG00000017754	PLTP	93.4972	1.83751	0.515291	3.56597	0.000362508	0.00645921
ENSMUSG00000017756	SLC12A7	3715.96	-0.440308	0.19725	-2.23223	0.0255995	0.146526
ENSMUSG00000017760	CTSA	7172.79	-0.470519	0.208558	-2.25606	0.0240671	0.14135
ENSMUSG00000017764	ZSWIM1	539.382	0.151754	0.188697	0.80422	0.42127	0.71862
ENSMUSG00000017765	SLC12A4	950.086	0.235507	0.167682	1.40448	0.160175	0.444606
ENSMUSG00000017767	SPATA25	0.440152	0.341237	0.370084	0.922055	0.3565	NA
ENSMUSG00000017774	MYO1C	1077.89	-0.500741	0.287589	-1.74117	0.0816536	0.302225
ENSMUSG00000017776	CRK	2339.91	0.105994	0.179009	0.592116	0.553773	0.807909
ENSMUSG00000017778	COX7C	1829.51	-0.461133	0.212367	-2.1714	0.0299009	0.162443
ENSMUSG00000017781	PITPNA	8641.32	-0.214976	0.101062	-2.12716	0.0334065	0.174099
ENSMUSG00000017801	MLX	1821.72	-0.396814	0.137324	-2.88962	0.00385705	0.0390472
ENSMUSG00000017802	FAM134C	4351.41	0.229345	0.179927	1.27466	0.202431	0.504965
ENSMUSG00000017817	JPH2	68.2647	-1.05966	0.499722	-2.1205	0.033964	0.176088
ENSMUSG00000017830	DHX58	1038.18	0.549311	0.42409	1.29527	0.195227	0.495597
ENSMUSG00000017831	RAB5A	1360.37	0.0344575	0.198975	0.173175	0.862514	0.953483
ENSMUSG00000017832	HSPB9	7.15977	0.565281	0.588362	0.96077	0.336668	0.648425
ENSMUSG00000017837	NKIRAS2	993.102	0.0620025	0.150469	0.41206	0.680295	0.878088
ENSMUSG00000017843	PPP2R5C	6723.94	0.023476	0.112275	0.209094	0.834375	0.945304
ENSMUSG00000017858	IFT52	1844.41	-0.358687	0.100508	-3.56875	0.000358687	0.00642647
ENSMUSG00000017861	MYBL2	1730.01	0.270658	0.333866	0.810678	0.417551	0.715444
ENSMUSG00000017868	SGK2	0	NA	NA	NA	NA	NA
ENSMUSG00000017897	EYA2	751.879	-0.860184	0.322864	-2.66423	0.00771642	0.0649327
ENSMUSG00000017922	PRL3C1	0	NA	NA	NA	NA	NA
ENSMUSG00000017929	B4GALT5	528.743	0.493311	0.276624	1.78333	0.0745333	0.286474
ENSMUSG00000017943	GDAP1L1	5.84535	1.09643	0.649472	1.68819	0.091374	0.323329
ENSMUSG00000017950	HNF4A	9.65232	0.248004	0.613935	0.403958	0.686244	0.881282
ENSMUSG00000017969	PTGIS	1.49965	0.183104	0.553994	0.330516	0.74101	NA
ENSMUSG00000017978	CADPS2	3.10125	0.491792	0.672301	0.731505	0.464471	0.749225
ENSMUSG00000017999	DDX27	3738.51	-0.150143	0.139821	-1.07382	0.282902	0.596476
ENSMUSG00000018001	CYTH3	564.064	0.12129	0.252393	0.480559	0.63083	0.851736
ENSMUSG00000018008	CYTH4	3565.02	-0.665619	0.299281	-2.22406	0.0261446	0.148805
ENSMUSG00000018012	RAC3	14.344	-0.122598	0.461414	-0.2657	0.79047	0.926701
ENSMUSG00000018040	RRP7A	4166.71	-0.127513	0.172375	-0.739745	0.459455	0.746483
ENSMUSG00000018042	CYB5R3	2066.71	-0.0130059	0.150857	-0.0862134	0.931297	0.977322
ENSMUSG00000018068	INTS2	1247.18	-0.428596	0.2107	-2.03416	0.041936	0.201368
ENSMUSG00000018076	MED13L	4779.77	0.213001	0.246273	0.864896	0.387096	0.69345
ENSMUSG00000018102	HIST1H2BC	681.057	1.84751	0.324904	5.68633	1.29798e-08	1.36129e-06
ENSMUSG00000018126	BAIAP2L2	9.70889	-0.207403	0.524	-0.395807	0.692247	0.883792
ENSMUSG00000018143	MAFK	2466.27	0.0702078	0.150517	0.466445	0.640897	0.85683
ENSMUSG00000018160	MED1	4267.65	0.0502303	0.165622	0.303282	0.761675	0.913429
ENSMUSG00000018166	ERBB3	406.057	-0.627695	0.265819	-2.36136	0.0182079	0.117849
ENSMUSG00000018167	STARD3	2044.16	-0.401619	0.204279	-1.96603	0.0492956	0.222383
ENSMUSG00000018168	IKZF3	3845.6	-0.174031	0.439031	-0.396398	0.691812	0.883776
ENSMUSG00000018169	MFNG	2247.05	-0.164061	0.163542	-1.00318	0.315776	0.628902
ENSMUSG00000018171	VMP1	2497.23	-0.0980185	0.123913	-0.791025	0.428929	0.723703
ENSMUSG00000018189	UCHL5	1673.02	0.127721	0.276377	0.462126	0.643991	0.858448
ENSMUSG00000018196	GLRX2	859.664	0.144006	0.128724	1.11873	0.263257	0.57554
ENSMUSG00000018199	TROVE2	317.29	0.358544	0.287542	1.24693	0.212423	0.5184
ENSMUSG00000018209	STK4	13939.4	0.181538	0.174456	1.0406	0.298063	0.611839
ENSMUSG00000018211	WFDC15B	0	NA	NA	NA	NA	NA
ENSMUSG00000018217	PMP22	1.54259	-0.057947	0.661111	-0.087651	0.930154	NA
ENSMUSG00000018238	GDF9	11.8891	0.575116	0.471411	1.21999	0.222469	0.530202
ENSMUSG00000018239	ZCCHC10	401.506	-0.265243	0.14746	-1.79874	0.07206	0.280669
ENSMUSG00000018259	PRL8A2	0	NA	NA	NA	NA	NA
ENSMUSG00000018263	TBX5	0	NA	NA	NA	NA	NA
ENSMUSG00000018286	PSMB6	4847.25	-0.125885	0.18574	-0.677749	0.497931	0.770458
ENSMUSG00000018287	SPAG7	1773.68	0.0818341	0.094742	0.863757	0.387721	0.693667
ENSMUSG00000018293	PFN1	37514.5	-0.132606	0.224806	-0.589869	0.555279	0.808504
ENSMUSG00000018322	TOMM34	2054.14	-0.396835	0.118948	-3.33622	0.000849264	0.0123373
ENSMUSG00000018326	YWHAB	8660.54	-0.214681	0.100257	-2.1413	0.0322501	0.170415
ENSMUSG00000018334	KSR1	1309.31	0.917239	0.176621	5.19325	2.0665e-07	1.42175e-05
ENSMUSG00000018339	GPX3	1.28534	1.2009	0.658971	1.82238	0.0683967	NA
ENSMUSG00000018340	ANXA6	16436.9	-0.243524	0.282865	-0.86092	0.389282	0.69493
ENSMUSG00000018341	IL12RB2	1297.17	-0.20092	0.326492	-0.615392	0.538296	0.797881
ENSMUSG00000018347	ZKSCAN6	893.562	-0.118446	0.1789	-0.662079	0.507921	0.777622
ENSMUSG00000018362	KPNA2	3396.92	-0.425735	0.562492	-0.756873	0.449126	0.738526
ENSMUSG00000018363	SMURF2	1317.1	0.0738374	0.278374	0.265245	0.790821	0.926781
ENSMUSG00000018372	CEP95	701.661	-0.625202	0.143972	-4.34252	1.40859e-05	0.000492433
ENSMUSG00000018377	VEZF1	3435.1	-0.162515	0.203427	-0.798887	0.424356	0.720345
ENSMUSG00000018378	CUEDC1	475.598	-0.849029	0.344141	-2.4671	0.0136213	0.0967727
ENSMUSG00000018379	SRSF1	12943.3	-0.302866	0.244575	-1.23834	0.215591	0.522646
ENSMUSG00000018381	ABI3	5109.2	-0.307097	0.224884	-1.36558	0.172072	0.461858
ENSMUSG00000018387	SHROOM1	0.121388	0	0.282173	0	1	NA
ENSMUSG00000018395	KIF3A	309.382	-1.00234	0.235709	-4.25246	2.11432e-05	0.000691376
ENSMUSG00000018398	SEPT8	79.0684	-1.55223	0.537919	-2.88562	0.00390645	0.03927
ENSMUSG00000018401	MTMR4	2237.25	0.201778	0.0970163	2.07983	0.0375408	0.187295
ENSMUSG00000018405	MRM1	821.925	0.0105063	0.187397	0.0560644	0.95529	0.98601
ENSMUSG00000018411	MAPT	3.56264	0.40309	0.6697	0.601896	0.547243	0.803533
ENSMUSG00000018412	KANSL1	5009.76	0.0761158	0.123802	0.614817	0.538676	0.798217
ENSMUSG00000018415	GID4	2209.88	0.217449	0.191675	1.13447	0.256599	0.568107
ENSMUSG00000018417	MYO1B	7.85085	0.973	0.646193	1.50574	0.132134	0.399912
ENSMUSG00000018425	DHX40	2420.36	-0.198235	0.253123	-0.783157	0.433535	0.726855
ENSMUSG00000018427	YPEL2	1478.79	-1.04033	0.313433	-3.31916	0.000902888	0.0129199
ENSMUSG00000018428	AKAP1	1447.32	-0.0536194	0.25927	-0.206809	0.836159	0.945758
ENSMUSG00000018433	NOL11	2092.44	-0.278803	0.128757	-2.16535	0.0303611	0.163857
ENSMUSG00000018442	DERL2	1034.03	0.0232719	0.117994	0.197229	0.843648	0.948069
ENSMUSG00000018446	C1QBP	4807.23	-0.366462	0.22726	-1.61252	0.106848	0.353216
ENSMUSG00000018449	RPAIN	561.124	0.508631	0.160535	3.16835	0.00153309	0.0194049
ENSMUSG00000018451	6330403K07RIK	15.4246	1.10526	0.644677	1.71444	0.0864484	0.313034
ENSMUSG00000018459	SLC13A3	5.43609	0.166973	0.645325	0.258742	0.795834	0.928849
ENSMUSG00000018470	KCNAB3	168.102	-0.508294	0.325036	-1.56381	0.117863	0.373961
ENSMUSG00000018474	CHD3	22687.2	0.559388	0.187796	2.97871	0.00289468	0.0313728
ENSMUSG00000018476	KDM6B	7964.5	0.114019	0.235634	0.48388	0.628471	0.850956
ENSMUSG00000018479	1700125H20RIK	0.580549	-0.432181	0.503964	-0.857563	0.391134	NA
ENSMUSG00000018481	APPBP2	3403.62	0.153785	0.158225	0.971939	0.331081	0.643656
ENSMUSG00000018486	WNT9B	0.0524242	0	0.282173	0	1	NA
ENSMUSG00000018500	ADORA2B	36.2053	1.18095	0.475867	2.48167	0.0130767	0.0939511
ENSMUSG00000018501	NCOR1	14515.7	-0.102569	0.16289	-0.629684	0.528901	0.792154
ENSMUSG00000018507	TRPV2	4712.35	0.36522	0.266567	1.37009	0.17066	0.459943
ENSMUSG00000018509	CENPV	160.927	-0.224441	0.416124	-0.539361	0.589637	0.828982
ENSMUSG00000018537	PCGF2	51.844	0.501753	0.450063	1.11485	0.264914	0.576826
ENSMUSG00000018541	CWC25	1471.14	-0.0228396	0.109218	-0.20912	0.834355	0.945304
ENSMUSG00000018543	1700001P01RIK	2.08224	-0.472338	0.668331	-0.706744	0.479726	NA
ENSMUSG00000018547	PIP4K2B	5660.37	0.159632	0.159893	0.99837	0.3181	0.630372
ENSMUSG00000018548	TRIM37	2330.09	-0.190908	0.292494	-0.652688	0.513957	0.781822
ENSMUSG00000018554	YBX2	92.032	0.189432	0.669364	0.283004	0.777174	0.92026
ENSMUSG00000018559	CTDNEP1	3468.25	0.0213909	0.145754	0.14676	0.883321	0.961109
ENSMUSG00000018565	ELP5	1782.85	0.0357003	0.147658	0.241777	0.808953	0.934326
ENSMUSG00000018566	SLC2A4	7.25137	0.68329	0.647797	1.05479	0.291521	0.605722
ENSMUSG00000018567	GABARAP	5453.72	-0.167444	0.185775	-0.901328	0.367414	0.676993
ENSMUSG00000018569	CLDN7	0.674248	0	0.358513	0	1	NA
ENSMUSG00000018570	2810408A11RIK	287.572	0.53461	0.173068	3.08901	0.00200823	0.023997
ENSMUSG00000018572	PHF23	3024.02	0.0722465	0.165546	0.436414	0.662536	0.86816
ENSMUSG00000018574	ACADVL	2053.67	-0.278115	0.189235	-1.46968	0.141648	0.417043
ENSMUSG00000018581	DNAH11	20.0044	0.0389462	0.403998	0.0964021	0.923201	0.974686
ENSMUSG00000018583	G3BP1	14088.8	-0.19251	0.148926	-1.29266	0.19613	0.496661
ENSMUSG00000018585	ATOX1	1022.57	-0.0896341	0.218024	-0.411119	0.680985	0.878307
ENSMUSG00000018589	GLRA2	0	NA	NA	NA	NA	NA
ENSMUSG00000018593	SPARC	2.3188	0.333941	0.672305	0.496711	0.619393	0.845655
ENSMUSG00000018595	GLRA4	0	NA	NA	NA	NA	NA
ENSMUSG00000018599	MIEF2	448.248	0.0561323	0.207542	0.270463	0.786804	0.924577
ENSMUSG00000018604	TBX3	0.0945778	-0.0491284	0.282173	-0.174107	0.861781	NA
ENSMUSG00000018620	MMP20	0	NA	NA	NA	NA	NA
ENSMUSG00000018623	MMP7	0	NA	NA	NA	NA	NA
ENSMUSG00000018634	CRHR1	0	NA	NA	NA	NA	NA
ENSMUSG00000018648	DUSP14	3.67734	-0.1146	0.660965	-0.173383	0.862351	0.953483
ENSMUSG00000018651	TADA2A	552.994	-0.268571	0.209825	-1.27998	0.200553	0.502592
ENSMUSG00000018654	IKZF1	29283.2	0.0644597	0.124988	0.515728	0.606045	0.838546
ENSMUSG00000018656	TCAF3	0	NA	NA	NA	NA	NA
ENSMUSG00000018659	PNPO	1334.63	-0.000175282	0.203457	-0.000861518	0.999313	1
ENSMUSG00000018661	COG1	2008.1	0.0943486	0.161676	0.583567	0.559511	0.809418
ENSMUSG00000018666	CBX1	4214.26	-0.0505143	0.175387	-0.288016	0.773334	0.918982
ENSMUSG00000018669	CDK5RAP3	3198.39	0.19393	0.174183	1.11337	0.26555	0.577315
ENSMUSG00000018672	COPZ2	4.38733	0.502239	0.654646	0.767192	0.442968	0.733611
ENSMUSG00000018677	SLC25A39	2553.98	-0.341424	0.198699	-1.7183	0.0857418	0.311854
ENSMUSG00000018678	SP2	1905.2	0.0757009	0.15749	0.48067	0.630751	0.851736
ENSMUSG00000018697	AATF	1889.99	-0.032063	0.18708	-0.171386	0.86392	0.954039
ENSMUSG00000018698	LHX1	0	NA	NA	NA	NA	NA
ENSMUSG00000018707	DYNC1H1	20948.2	0.481303	0.163562	2.94262	0.00325443	0.0342362
ENSMUSG00000018727	CPSF4L	112.249	-0.460727	0.660932	-0.697086	0.485749	0.762451
ENSMUSG00000018733	PEX12	478.912	0.00287382	0.155737	0.0184531	0.985277	0.995668
ENSMUSG00000018736	NDEL1	1283.24	-0.13941	0.110799	-1.25822	0.208313	0.512788
ENSMUSG00000018740	SLC25A35	321.692	0.186872	0.251801	0.742142	0.458001	0.745352
ENSMUSG00000018750	ZBTB4	804.789	-0.673987	0.305162	-2.20862	0.0272013	0.152597
ENSMUSG00000018752	TNFSFM13	2.66226	0.575426	0.669276	0.859774	0.389913	0.695035
ENSMUSG00000018761	MPDU1	1735.48	0.293965	0.164632	1.78558	0.0741666	0.28532
ENSMUSG00000018765	FXR2	3336.46	0.261578	0.123974	2.10994	0.0348638	0.179109
ENSMUSG00000018770	ATP5G3	6223.89	-0.0935615	0.16494	-0.567244	0.570548	0.816697
ENSMUSG00000018774	CD68	93.6224	0.299547	0.302922	0.988859	0.322732	0.635061
ENSMUSG00000018776	SLC35G3	7.62617	-0.591411	0.64283	-0.92001	0.357567	0.668068
ENSMUSG00000018796	ACSL1	342.257	0.51515	0.261543	1.96966	0.0488777	0.221561
ENSMUSG00000018800	ABCA5	9.31614	0.680526	0.544098	1.25074	0.211028	0.516536
[truncated: 46,796 more rows]

## Sheet: 24 hours KO vs HET unfiltered
ID	gene	baseMean	log2FoldChange	lfcSE	stat	pvalue	padj
ENSMUSG00000000001	GNAI3	10504.4	0.0339508	0.282618	0.12013	0.90438	0.965089
ENSMUSG00000000003	PBSN	0	NA	NA	NA	NA	NA
ENSMUSG00000000028	CDC45	1597.1	-0.6464	0.333865	-1.93611	0.0528543	0.200866
ENSMUSG00000000031	H19	10327.6	-1.87056	0.584831	-3.19847	0.00138159	0.0155146
ENSMUSG00000000037	SCML2	65.5556	-1.32374	0.369624	-3.58132	0.000341861	0.00535904
ENSMUSG00000000049	APOH	1.70369	1.22836	0.668176	1.83837	0.0660076	NA
ENSMUSG00000000056	NARF	1982.71	-0.0515529	0.215452	-0.239278	0.81089	0.925618
ENSMUSG00000000058	CAV2	2.00738	0.124304	0.671606	0.185085	0.853163	NA
ENSMUSG00000000078	KLF6	1647.36	0.234328	0.258893	0.905114	0.365405	0.634694
ENSMUSG00000000085	SCMH1	1195.44	0.00359967	0.159538	0.022563	0.981999	0.994388
ENSMUSG00000000088	COX5A	3359.84	-0.0293174	0.154248	-0.190066	0.849257	0.941098
ENSMUSG00000000093	TBX2	2.0632	0.341637	0.665557	0.513309	0.607735	NA
ENSMUSG00000000094	TBX4	0.424463	0	0.282303	0	1	NA
ENSMUSG00000000103	ZFY2	0	NA	NA	NA	NA	NA
ENSMUSG00000000120	NGFR	36.6058	-0.284619	0.614488	-0.463181	0.643235	0.838671
ENSMUSG00000000125	WNT3	0.884114	0.437188	0.616919	0.708664	0.478533	NA
ENSMUSG00000000126	WNT9A	4.84536	0.410965	0.626312	0.656166	NA	NA
ENSMUSG00000000127	FER	44.1557	0.777202	0.300453	2.58677	0.00968796	0.0637275
ENSMUSG00000000131	XPO6	5793.68	-0.239607	0.128146	-1.86981	0.0615106	0.221989
ENSMUSG00000000134	TFE3	1402.18	0.792269	0.202401	3.91436	9.06444e-05	0.0018795
ENSMUSG00000000142	AXIN2	891.911	0.134188	0.223602	0.600119	0.548427	0.779167
ENSMUSG00000000148	BRAT1	1370.78	0.215349	0.152607	1.41114	0.158204	0.400852
ENSMUSG00000000149	GNA12	2086.33	0.298746	0.125482	2.38078	0.0172761	0.0948765
ENSMUSG00000000154	SLC22A18	1.60429	-0.420219	0.665765	-0.631182	0.527922	NA
ENSMUSG00000000157	ITGB2L	0.0611446	0.048088	0.282173	0.17042	0.86468	NA
ENSMUSG00000000159	IGSF5	1.73872	1.29025	0.620693	2.07872	0.0376426	NA
ENSMUSG00000000167	PIH1D2	37.7746	0.645	0.357434	1.80453	0.0711488	0.244909
ENSMUSG00000000168	DLAT	1677.7	-0.119892	0.0962596	-1.2455	0.212947	0.47478
ENSMUSG00000000171	SDHD	2904.19	-0.201086	0.1227	-1.63885	0.101245	0.305272
ENSMUSG00000000182	FGF23	0	NA	NA	NA	NA	NA
ENSMUSG00000000183	FGF6	0.0758083	0	0.282173	0	1	NA
ENSMUSG00000000184	CCND2	18069.7	0.484781	0.221189	2.19171	0.0284005	0.13248
ENSMUSG00000000194	GPR107	1676	0.0813187	0.177671	0.457692	0.647174	0.840252
ENSMUSG00000000197	NALCN	0	NA	NA	NA	NA	NA
ENSMUSG00000000202	BTBD17	0.660877	-0.459688	0.539006	-0.852845	0.393745	NA
ENSMUSG00000000204	SLFN4	0.813163	-0.377038	0.60102	-0.62733	0.530443	NA
ENSMUSG00000000214	TH	0.0984641	0	0.282173	0	1	NA
ENSMUSG00000000215	INS2	0	NA	NA	NA	NA	NA
ENSMUSG00000000216	SCNN1G	0.0945778	0	0.282173	0	1	NA
ENSMUSG00000000223	DRP2	6.79824	-0.357441	0.516159	-0.692502	0.488622	0.735179
ENSMUSG00000000244	TSPAN32	1320.87	0.805238	0.624305	1.28981	0.197115	0.454943
ENSMUSG00000000247	LHX2	18.1787	-1.14307	0.558049	-2.04833	0.0405277	0.169336
ENSMUSG00000000248	CLEC2G	5.89332	0.114489	0.424951	0.269417	0.787608	0.915613
ENSMUSG00000000253	GMPR	495.435	-1.01104	0.230358	-4.38901	1.1387e-05	0.000354015
ENSMUSG00000000263	GLRA1	0	NA	NA	NA	NA	NA
ENSMUSG00000000266	MID2	1.22492	0	0.614398	0	1	NA
ENSMUSG00000000275	TRIM25	5331.62	-0.477361	0.222647	-2.14402	0.032031	0.143791
ENSMUSG00000000276	DGKE	2548.78	-1.06641	0.414271	-2.57418	0.0100477	0.0653729
ENSMUSG00000000278	SCPEP1	367.699	0.11715	0.292179	0.400954	0.688454	0.863866
ENSMUSG00000000282	MNT	2755.31	-0.0116866	0.198845	-0.0587726	0.953133	0.98341
ENSMUSG00000000290	ITGB2	8922.93	0.78724	0.345195	2.28056	0.0225743	0.112973
ENSMUSG00000000295	HDDC2	635.118	-0.465646	0.184813	-2.51955	0.0117505	0.0728276
ENSMUSG00000000296	TPD52L1	0.178091	0	0.282173	0	1	NA
ENSMUSG00000000301	PEMT	96.8606	0.0626119	0.247095	0.253392	0.799965	0.921427
ENSMUSG00000000303	CDH1	1343.55	-1.17046	0.400236	-2.92443	0.00345089	0.0305313
ENSMUSG00000000305	CDH4	1.22984	-0.316885	0.645004	-0.491291	0.62322	NA
ENSMUSG00000000308	CKMT1	0.536038	0.405986	0.433934	0.935595	0.349482	NA
ENSMUSG00000000317	BCL6B	20.556	-0.32764	0.528597	-0.61983	0.53537	0.770072
ENSMUSG00000000318	CLEC10A	1.92373	0.342476	0.664534	0.515363	0.6063	NA
ENSMUSG00000000320	ALOX12	0.681067	-0.181393	0.423327	-0.428494	0.668292	NA
ENSMUSG00000000325	ARVCF	654.155	-0.518426	0.281936	-1.8388	0.065944	0.232707
ENSMUSG00000000326	COMT	677.047	0.105767	0.196361	0.538638	0.590137	0.806504
ENSMUSG00000000339	RTCA	1129.73	-0.464064	0.0996386	-4.65748	3.20111e-06	0.000120467
ENSMUSG00000000340	DBT	857.99	-0.157978	0.192735	-0.819666	0.412407	0.675865
ENSMUSG00000000346	DAZAP2	10706.9	0.0282575	0.128659	0.219631	0.826159	0.932318
ENSMUSG00000000355	MCTS1	915.774	-0.106534	0.243577	-0.437373	0.661841	0.847804
ENSMUSG00000000359	REM1	0.19907	0.0924272	0.282173	0.327555	0.743248	NA
ENSMUSG00000000365	RNF17	7.3812	-0.539307	0.598798	-0.900648	0.367775	0.636986
ENSMUSG00000000374	TRAPPC10	3723.6	0.141373	0.122198	1.15691	0.247308	0.517766
ENSMUSG00000000378	CCM2	4024.59	-0.357778	0.196739	-1.81854	0.0689817	0.240127
ENSMUSG00000000381	WAP	0	NA	NA	NA	NA	NA
ENSMUSG00000000384	TBRG4	2501.15	-0.115683	0.165612	-0.698517	0.484854	0.732281
ENSMUSG00000000385	TMPRSS2	1.07585	0.28337	0.608838	0.465427	0.641625	NA
ENSMUSG00000000386	MX1	178.273	-1.45327	0.535454	-2.71408	0.006646	0.0490083
ENSMUSG00000000392	FAP	1.78709	-0.479524	0.642793	-0.746	0.455667	NA
ENSMUSG00000000394	GCG	0.0592209	0	0.282173	0	1	NA
ENSMUSG00000000399	NDUFA9	2995.29	-0.08257	0.128022	-0.644965	0.51895	0.757056
ENSMUSG00000000402	EGFL6	0.558456	0	0.339931	0	1	NA
ENSMUSG00000000409	LCK	47518.6	-0.956339	0.170079	-5.62292	1.87754e-08	1.507e-06
ENSMUSG00000000411	TSSK3	0.169159	0.0924272	0.282173	0.327555	0.743248	NA
ENSMUSG00000000416	CTTNBP2	22.0502	0.425473	0.606757	0.701224	0.483163	0.730851
ENSMUSG00000000420	GALNT1	6324.02	0.14939	0.200044	0.746788	0.455191	0.709673
ENSMUSG00000000435	MYF5	0	NA	NA	NA	NA	NA
ENSMUSG00000000439	MKRN2	1523.53	0.0540113	0.0756556	0.71391	0.475283	0.724773
ENSMUSG00000000440	PPARG	77.591	-0.412238	0.509015	-0.809874	0.418013	0.680198
ENSMUSG00000000441	RAF1	4201.46	0.164179	0.0826281	1.98696	0.0469263	0.185912
ENSMUSG00000000486	SEPT1	17715.2	-0.257166	0.181579	-1.41628	0.156695	0.398395
ENSMUSG00000000489	PDGFB	7.91076	1.30339	0.588289	2.21555	0.0267222	0.126705
ENSMUSG00000000530	ACVRL1	77.3816	-0.0181367	0.390543	-0.0464398	0.96296	0.987628
ENSMUSG00000000531	GRASP	362.672	-1.72902	0.405165	-4.26744	1.97725e-05	0.000558208
ENSMUSG00000000532	ACVR1B	1555.96	0.447617	0.184661	2.42399	0.0153509	0.0880397
ENSMUSG00000000538	TOM1L2	907.718	0.279311	0.18162	1.53789	0.124076	0.346455
ENSMUSG00000000544	GPA33	0.356316	0.00452073	0.355978	0.0126995	0.989868	NA
ENSMUSG00000000552	ZFP385A	1723.47	-0.245328	0.244655	-1.00275	0.31598	0.588573
ENSMUSG00000000555	ITGA5	925.044	-1.16439	0.23193	-5.02045	5.15505e-07	2.67278e-05
ENSMUSG00000000560	GABRA2	0.520326	-0.220484	0.464721	-0.474444	0.635183	NA
ENSMUSG00000000561	WDR77	3377.32	-0.146203	0.193973	-0.753731	0.451011	0.706462
ENSMUSG00000000562	ADORA3	25.1509	1.92093	0.46375	4.14217	3.44029e-05	0.000862398
ENSMUSG00000000563	ATP5F1	10174.6	-0.179126	0.143941	-1.24444	0.213337	0.475522
ENSMUSG00000000567	SOX9	0.769766	0.0562586	0.595013	0.0945502	0.924672	NA
ENSMUSG00000000568	HNRNPD	7961.1	-0.523194	0.223677	-2.33906	0.0193325	0.102459
ENSMUSG00000000579	DYNLT1C	703.501	-0.0653241	0.233512	-0.279746	0.779672	0.912232
ENSMUSG00000000581	C1D	1414.07	-0.029199	0.196799	-0.148369	0.882051	0.955231
ENSMUSG00000000594	GM2A	6527.04	0.185906	0.177284	1.04863	0.294348	0.567126
ENSMUSG00000000600	KRIT1	1628.55	0.314857	0.233898	1.34613	0.178261	0.429608
ENSMUSG00000000605	CLCN4	2111.94	0.161739	0.186681	0.866391	0.386276	0.653183
ENSMUSG00000000606	VMN2R88	0	NA	NA	NA	NA	NA
ENSMUSG00000000617	GRM6	0.61508	0	0.472198	0	1	NA
ENSMUSG00000000627	SEMA4F	260.853	0.361233	0.483746	0.746741	0.45522	0.709673
ENSMUSG00000000628	HK2	786.74	0.735735	0.284572	2.58541	0.00972626	0.0639291
ENSMUSG00000000631	MYO18A	6032.76	-0.34684	0.201805	-1.71868	0.0856718	0.275492
ENSMUSG00000000632	SEZ6	0.167738	0.0924272	0.282173	0.327555	0.743248	NA
ENSMUSG00000000673	HAAO	38.377	-0.377284	0.661082	-0.570707	0.568198	0.790981
ENSMUSG00000000682	CD52	5689.07	1.25282	0.436227	2.87195	0.00407953	0.0342139
ENSMUSG00000000686	ABHD15	940.379	-0.267233	0.289951	-0.921648	0.356712	0.627381
ENSMUSG00000000690	HOXB6	0	NA	NA	NA	NA	NA
ENSMUSG00000000693	LOXL3	11.1918	0.238745	0.518914	0.460085	0.645455	0.839263
ENSMUSG00000000701	TCL1B5	0	NA	NA	NA	NA	NA
ENSMUSG00000000706	BTN1A1	1.41475	0.655207	0.657799	0.996059	0.319221	NA
ENSMUSG00000000708	KAT2B	1509.63	-0.472556	0.236895	-1.99479	0.0460655	0.183809
ENSMUSG00000000711	RAB5B	3305.4	0.113395	0.176805	0.641354	0.521293	0.75876
ENSMUSG00000000724	CRYBA1	0	NA	NA	NA	NA	NA
ENSMUSG00000000730	DNMT3L	14.9379	-1.15661	0.558297	-2.07168	0.0382955	0.162683
ENSMUSG00000000731	AIRE	65.2245	-0.167417	0.506437	-0.330579	0.740962	0.892383
ENSMUSG00000000732	ICOSL	385.678	-0.545824	0.284963	-1.91542	0.0554393	0.207142
ENSMUSG00000000738	SPG7	1908.92	0.401362	0.124979	3.21144	0.00132072	0.0150725
ENSMUSG00000000739	SULT5A1	2.81751	0.569388	0.664691	0.856621	0.391654	0.658145
ENSMUSG00000000740	RPL13	21033.5	-0.131142	0.187782	-0.69837	0.484946	0.732353
ENSMUSG00000000743	CHMP1A	3032.34	-0.0469336	0.199511	-0.235243	0.81402	0.926841
ENSMUSG00000000751	RPA1	7314.51	-0.43258	0.14871	-2.90888	0.00362721	0.0315891
ENSMUSG00000000753	SERPINF1	30.2651	0.935115	0.483889	1.9325	0.0532981	0.202
ENSMUSG00000000759	TUBGCP3	2240.36	-0.14668	0.0933229	-1.57175	0.116008	0.333005
ENSMUSG00000000766	OPRM1	0.28013	-0.0458954	0.299097	-0.153447	0.878046	NA
ENSMUSG00000000776	POLR3D	850.618	-0.358492	0.228557	-1.5685	0.116765	0.334142
ENSMUSG00000000782	TCF7	84410.3	-0.279699	0.115725	-2.41693	0.0156521	0.0890328
ENSMUSG00000000787	DDX3X	17102	-0.316391	0.271779	-1.16415	0.244365	0.51433
ENSMUSG00000000791	IL12RB1	1714.93	-0.152431	0.295634	-0.515607	0.606129	0.816695
ENSMUSG00000000792	SLC5A5	2.34866	1.54928	0.668371	2.31799	0.0204496	NA
ENSMUSG00000000794	KCNN3	1.99808	-0.386141	0.667509	-0.57848	0.56294	NA
ENSMUSG00000000804	USP32	1401.39	0.164385	0.197399	0.832755	0.404983	0.670076
ENSMUSG00000000805	CAR4	0.228713	0.048088	0.282173	0.17042	NA	NA
ENSMUSG00000000811	TXNRD3	392.377	0.884399	0.326464	2.70902	0.00674823	0.0493611
ENSMUSG00000000817	FASL	67.5288	-0.210039	0.493112	-0.425946	0.670147	0.853207
ENSMUSG00000000823	ZFP512B	2203	-0.241246	0.216352	-1.11507	0.264822	0.536945
ENSMUSG00000000826	DNAJC5	5943.64	-0.047399	0.11852	-0.399922	0.689214	0.864105
ENSMUSG00000000827	TPD52L2	1992.61	-0.00845307	0.129806	-0.0651206	0.948078	0.981287
ENSMUSG00000000838	FMR1	1700.15	-0.160231	0.31525	-0.508266	0.611267	0.819339
ENSMUSG00000000861	BCL11A	112.82	-1.07871	0.537498	-2.00692	0.0447587	0.180711
ENSMUSG00000000869	IL4	9.79724	1.44777	0.670993	2.15766	0.0309546	0.140727
ENSMUSG00000000876	PXMP4	1188.83	-0.374832	0.127966	-2.92915	0.00339886	0.0301991
ENSMUSG00000000881	DLG3	651.534	-0.310217	0.145676	-2.1295	0.0332132	0.146925
ENSMUSG00000000884	GNB1L	604.856	-0.226028	0.184344	-1.22612	0.220153	0.483549
ENSMUSG00000000889	DBH	0.67598	-0.150288	0.532307	-0.282334	0.777688	NA
ENSMUSG00000000901	MMP11	131.722	-0.197013	0.357607	-0.550921	0.581688	0.800846
ENSMUSG00000000902	SMARCB1	3819.14	0.0282258	0.155891	0.181061	0.85632	0.943901
ENSMUSG00000000903	VPREB3	0.728092	-0.141152	0.425806	-0.331494	0.740272	NA
ENSMUSG00000000915	HIP1R	1857.4	0.444484	0.24729	1.79742	0.0722689	0.247493
ENSMUSG00000000916	NSUN5	832.776	-0.236406	0.182938	-1.29227	0.196263	0.453824
ENSMUSG00000000934	TOP1MT	221.593	-0.027182	0.206599	-0.131569	0.895325	0.961437
ENSMUSG00000000938	HOXA10	0.735732	-0.190331	0.451955	-0.421129	0.673661	NA
ENSMUSG00000000942	HOXA4	8.58454	-0.369308	0.607935	-0.60748	0.543533	0.775115
ENSMUSG00000000948	GM38393	0.024507	0	0.282173	0	1	NA
ENSMUSG00000000957	MMP14	97.8531	0.660113	0.456076	1.44737	0.147792	0.385303
ENSMUSG00000000958	SLC7A7	36.0503	-0.756431	0.377271	-2.00501	0.044962	0.181179
ENSMUSG00000000959	OXA1L	3248.01	0.247229	0.137266	1.8011	0.071687	0.246207
ENSMUSG00000000976	HEATR6	1604.81	-0.160021	0.124805	-1.28217	0.199784	0.457593
ENSMUSG00000000982	CCL3	96.5099	2.26828	0.670805	3.38143	0.000721093	0.00962788
ENSMUSG00000000983	WFDC18	0.29934	0.048088	0.282173	0.17042	0.86468	NA
ENSMUSG00000001014	ICAM4	10.9151	0.440042	0.521277	0.844161	0.398579	0.664119
ENSMUSG00000001016	ILF2	4116.54	-0.276817	0.127422	-2.17244	0.0298223	0.136894
ENSMUSG00000001017	CHTOP	7351.63	0.108463	0.0914237	1.18638	0.235473	0.503231
ENSMUSG00000001018	SNAPIN	1006.35	0.198476	0.174168	1.13956	0.254469	0.526112
ENSMUSG00000001020	S100A4	971.186	1.22149	0.657469	1.85787	0.063187	0.225987
ENSMUSG00000001021	S100A3	8.28002	0.383622	0.670725	0.571951	0.567355	0.790452
ENSMUSG00000001023	S100A5	0.397335	0	0.282346	0	1	NA
ENSMUSG00000001025	S100A6	385.24	0.73728	0.636674	1.15802	0.246856	0.517552
ENSMUSG00000001027	SCN4A	3.09747	0.687076	0.662371	1.0373	0.299597	0.571893
ENSMUSG00000001029	ICAM2	1459.55	0.0570646	0.188012	0.303517	0.761496	0.901836
ENSMUSG00000001034	MAPK7	986.141	-0.25158	0.25447	-0.98864	0.322839	0.59532
ENSMUSG00000001036	EPN2	16.463	-0.68595	0.471424	-1.45506	0.145653	0.382038
ENSMUSG00000001039	B9D1	81.4496	-1.24793	0.448866	-2.78019	0.0054327	0.0421663
ENSMUSG00000001052	SEC24B	4418.5	0.0685905	0.127861	0.536447	0.591649	0.80719
ENSMUSG00000001053	N4BP3	696.953	-0.374539	0.244725	-1.53045	0.125906	0.349285
ENSMUSG00000001054	RMND5B	2087.78	0.0725737	0.187805	0.386432	0.699177	0.870009
ENSMUSG00000001056	NHP2	2672.3	-0.58623	0.226415	-2.58918	0.00962038	0.0634329
ENSMUSG00000001062	VPS9D1	582.835	0.24523	0.204262	1.20057	0.22992	0.496445
ENSMUSG00000001065	ZFP276	793.262	0.0497583	0.15961	0.31175	0.755231	0.898303
ENSMUSG00000001076	C1QL4	0.269458	0	0.282173	0	1	NA
ENSMUSG00000001082	MFSD10	1241.76	0.125771	0.156346	0.804439	0.421144	0.682703
ENSMUSG00000001089	LUZP1	768.804	0.350832	0.23162	1.51469	0.129851	0.356186
ENSMUSG00000001095	SLC13A2	0.686268	0	0.362824	0	1	NA
ENSMUSG00000001098	KCTD10	3193.01	0.504886	0.213753	2.36201	0.0181763	0.0980815
ENSMUSG00000001100	POLDIP2	2450.25	-0.155662	0.166847	-0.932964	0.350839	0.623045
ENSMUSG00000001103	SEBOX	1.74179	0.035454	0.287881	0.123155	NA	NA
ENSMUSG00000001105	IFT20	1021.83	-0.0814204	0.114649	-0.71017	0.477599	0.726492
ENSMUSG00000001119	COL6A1	5.70206	3.59683	0.667289	5.39022	NA	NA
ENSMUSG00000001120	PCBP3	344.577	-0.444812	0.231271	-1.92333	0.054438	0.204752
ENSMUSG00000001123	LGALS9	15799	-0.731675	0.187487	-3.90254	9.51873e-05	0.00195708
ENSMUSG00000001127	ARAF	1806.87	0.0196721	0.138291	0.142252	0.886881	0.957419
ENSMUSG00000001128	CFP	98.163	0.055655	0.301985	0.184297	0.85378	0.943041
ENSMUSG00000001131	TIMP1	0.677084	-0.0153466	0.583829	-0.0262861	0.979029	NA
ENSMUSG00000001134	UXT	535.868	-0.315797	0.160276	-1.97034	0.0487998	0.191079
ENSMUSG00000001138	CNNM3	1375.68	0.202022	0.109548	1.84414	0.0651623	0.230827
ENSMUSG00000001143	LMAN2L	2982.77	-0.417343	0.210801	-1.97979	0.0477268	0.18813
ENSMUSG00000001150	MCM3AP	3763.57	-0.0343534	0.107156	-0.320591	0.74852	0.895408
ENSMUSG00000001151	PCNT	3544.26	-0.088465	0.185707	-0.476369	0.633812	0.83336
ENSMUSG00000001155	FTCD	0.0309578	0	0.282173	0	1	NA
ENSMUSG00000001156	MXD1	901.323	0.278917	0.223317	1.24898	0.211674	0.473205
ENSMUSG00000001157	GMCL1	1571.47	0.142158	0.201134	0.706783	0.479701	0.727791
ENSMUSG00000001158	SNRNP27	1540.53	-0.502343	0.143042	-3.51186	0.000444985	0.00653389
ENSMUSG00000001166	OAS1C	281.631	-0.559616	0.26947	-2.07672	0.037827	0.161391
ENSMUSG00000001168	OAS1H	0	NA	NA	NA	NA	NA
ENSMUSG00000001173	OCRL	453.869	-0.303648	0.19382	-1.56665	0.117198	0.334807
ENSMUSG00000001175	CALM1	13298.8	-0.0327614	0.18097	-0.181032	0.856342	0.943901
ENSMUSG00000001211	AGPAT3	4319.1	-0.25156	0.196718	-1.27879	0.200973	0.459184
ENSMUSG00000001225	SLC26A3	0.0289605	0	0.282173	0	1	NA
ENSMUSG00000001227	SEMA6B	80.1059	0.232974	0.36965	0.630256	0.528527	0.764375
ENSMUSG00000001228	UHRF1	13700.7	-0.890099	0.30579	-2.91082	0.00360479	0.0314595
ENSMUSG00000001229	DPP9	3033.22	-0.158266	0.111706	-1.41682	0.156536	0.398208
ENSMUSG00000001240	RAMP2	12.9069	0.784669	0.628096	1.24928	0.211562	0.473087
ENSMUSG00000001247	LSR	106.483	-0.662451	0.387526	-1.70944	0.0873699	0.279219
ENSMUSG00000001248	GRAMD1A	4364.42	0.712993	0.348004	2.04881	0.040481	0.169261
ENSMUSG00000001249	HPN	6.81971	2.89138	0.611208	4.7306	2.2386e-06	8.91574e-05
ENSMUSG00000001260	GABRG1	0.122289	0.0924272	0.282173	0.327555	0.743248	NA
ENSMUSG00000001270	CKB	103.635	1.06581	0.446712	2.38591	0.0170369	0.0941515
ENSMUSG00000001280	SP1	6802.54	-0.0648544	0.196188	-0.330574	0.740967	0.892383
ENSMUSG00000001281	ITGB7	6333.13	0.408559	0.602879	0.67768	0.497975	0.742161
ENSMUSG00000001285	MYG1	1679.75	-0.51025	0.182431	-2.79695	0.00515881	0.0407217
ENSMUSG00000001288	RARG	231.733	1.17697	0.596009	1.97475	0.0482967	0.189436
ENSMUSG00000001289	PFDN5	4605.02	0.0199564	0.182382	0.109421	0.912869	0.968317
ENSMUSG00000001300	EFNB2	26.2632	2.90361	0.448177	6.47872	9.25044e-11	1.44102e-08
ENSMUSG00000001305	RRP15	1193.76	-0.195203	0.193746	-1.00752	0.313685	0.586381
ENSMUSG00000001313	RND2	152.446	0.582246	0.242892	2.39714	0.0165234	0.0924019
ENSMUSG00000001323	SRR	656.243	0.315757	0.120252	2.6258	0.00864464	0.0590034
ENSMUSG00000001333	SYNC	0.236108	0.136766	0.282173	0.48469	0.627896	NA
ENSMUSG00000001334	FNDC5	0.083621	0.048088	0.282173	0.17042	0.86468	NA
ENSMUSG00000001348	ACP5	2632.34	-1.06259	0.363987	-2.91932	0.00350799	0.0308989
ENSMUSG00000001349	CNN1	0.141424	-0.0849298	0.282173	-0.300984	0.763426	NA
ENSMUSG00000001366	FBXO9	1379.14	0.445082	0.167023	2.6648	0.00770345	0.0543802
ENSMUSG00000001376	VPS50	797.108	-0.155609	0.213136	-0.730095	0.465332	0.717598
ENSMUSG00000001380	HARS	2958.15	-0.313634	0.109097	-2.87482	0.00404263	0.034018
ENSMUSG00000001383	ZMAT2	3321.97	-0.277862	0.102384	-2.71392	0.00664916	0.04901
ENSMUSG00000001403	UBE2C	1978.05	-0.248078	0.376667	-0.658615	0.510143	0.750389
ENSMUSG00000001415	SMG5	4303.84	-0.436657	0.145822	-2.99445	0.00274938	0.0258889
ENSMUSG00000001416	CCT3	10616.4	-0.244327	0.170257	-1.43504	0.151275	0.390889
ENSMUSG00000001418	GLMP	2764.73	0.0434075	0.198822	0.218323	0.827177	0.932459
ENSMUSG00000001419	MEF2D	8223.21	0.0671906	0.184088	0.364991	0.715118	0.878973
ENSMUSG00000001420	TMEM79	69.9127	0.330654	0.265451	1.24563	0.212901	0.474741
ENSMUSG00000001424	SND1	8592.41	-0.209779	0.146344	-1.43346	0.151727	0.391451
ENSMUSG00000001435	COL18A1	1.73769	1.85265	0.662682	2.79569	0.00517888	NA
ENSMUSG00000001436	SLC19A1	1219.89	-0.107972	0.262506	-0.411311	0.680845	0.859676
ENSMUSG00000001440	KPNB1	17943.2	-0.271938	0.13768	-1.97515	0.0482509	0.189318
ENSMUSG00000001441	NPEPPS	3214.45	0.334495	0.0973982	3.4343	0.000594086	0.00825835
ENSMUSG00000001444	TBX21	43.457	1.84689	0.519439	3.55554	0.000377199	0.00576152
ENSMUSG00000001445	MRPL10	1919.95	-0.172183	0.132727	-1.29727	0.194537	0.45156
ENSMUSG00000001467	CYP51	2395.69	-0.614537	0.249056	-2.46746	0.0136074	0.0806446
ENSMUSG00000001472	TCF25	14013.4	-0.151707	0.126392	-1.20029	0.230027	0.496484
ENSMUSG00000001473	TUBB6	8.36653	0.964896	0.549783	1.75505	0.0792513	0.262052
ENSMUSG00000001482	DEF8	2343.79	0.0671192	0.185588	0.361656	0.717609	0.880529
ENSMUSG00000001493	MEOX1	0	NA	NA	NA	NA	NA
ENSMUSG00000001494	SOST	0	NA	NA	NA	NA	NA
ENSMUSG00000001496	NKX2-1	0	NA	NA	NA	NA	NA
ENSMUSG00000001497	PAX9	2.02793	-0.0166101	0.672759	-0.0246896	0.980303	NA
ENSMUSG00000001504	IRX2	0.464377	0.206424	0.417467	0.494468	0.620976	NA
ENSMUSG00000001506	COL1A1	29.7443	-0.389842	0.412956	-0.944029	0.345155	0.617021
ENSMUSG00000001507	ITGA3	78.3598	1.65208	0.38038	4.34323	1.40405e-05	0.000420836
ENSMUSG00000001508	SGCA	1.86537	0.173408	0.651039	0.266356	0.789965	NA
ENSMUSG00000001510	DLX3	0.492466	0.267266	0.386479	0.691541	0.489226	NA
ENSMUSG00000001517	FOXM1	1882.93	-0.139651	0.358949	-0.389056	0.697235	0.869254
ENSMUSG00000001518	ITFG2	752.28	0.0616551	0.145629	0.42337	0.672025	0.854109
ENSMUSG00000001520	NRIP2	1.60875	-0.323271	0.653004	-0.495052	0.620564	NA
ENSMUSG00000001521	TULP3	410.133	-0.43568	0.246281	-1.76904	0.0768877	0.257501
ENSMUSG00000001524	GTF2H4	864.677	-0.0575505	0.192743	-0.298586	0.765256	0.90398
ENSMUSG00000001525	TUBB5	49811.6	-0.591053	0.170522	-3.46615	0.000527978	0.00747633
ENSMUSG00000001542	ELL2	122.73	1.33813	0.354917	3.77027	0.000163074	0.00301496
ENSMUSG00000001552	JUP	493.17	-0.222494	0.575532	-0.386589	0.69906	0.870009
ENSMUSG00000001555	FKBP10	19.1733	0.337565	0.610081	0.553312	NA	NA
ENSMUSG00000001558	KLHL10	29.712	0.110049	0.337382	0.326186	0.744284	0.893579
ENSMUSG00000001566	MNX1	0.0264254	0	0.282173	0	1	NA
ENSMUSG00000001569	NOM1	2063.37	-0.0767848	0.118026	-0.650575	0.515321	0.754234
ENSMUSG00000001576	ERGIC1	4059.34	-0.19886	0.145077	-1.37073	0.17046	0.419121
ENSMUSG00000001583	TNK1	1.19985	-0.182615	0.64923	-0.281279	0.778496	NA
ENSMUSG00000001588	ACAP1	11342.4	0.282893	0.184672	1.53187	0.125555	0.348875
ENSMUSG00000001604	TCEA3	0.516852	0.144506	0.475737	0.303752	0.761317	NA
ENSMUSG00000001622	CSN3	0	NA	NA	NA	NA	NA
ENSMUSG00000001627	IFRD1	1004.73	0.0675828	0.199122	0.339404	0.734305	0.88951
ENSMUSG00000001630	STK38L	309.384	0.539973	0.160153	3.37161	0.000747314	0.00990191
ENSMUSG00000001632	BRPF1	3133.89	-0.139545	0.0972711	-1.4346	0.151402	0.391043
ENSMUSG00000001642	AKR1B3	9154.54	0.123072	0.156914	0.78433	0.432847	0.692588
ENSMUSG00000001655	HOXC13	0	NA	NA	NA	NA	NA
ENSMUSG00000001656	HOXC11	0	NA	NA	NA	NA	NA
ENSMUSG00000001657	HOXC8	0	NA	NA	NA	NA	NA
ENSMUSG00000001661	HOXC6	0	NA	NA	NA	NA	NA
ENSMUSG00000001663	GSTT1	6.79136	1.81037	0.594353	3.04595	0.00231949	0.0226588
ENSMUSG00000001665	GSTT3	164.929	0.397497	0.253891	1.56562	0.117438	0.335252
ENSMUSG00000001666	DDT	1179.85	0.384429	0.1807	2.12745	0.0333829	0.14748
ENSMUSG00000001670	TAT	0	NA	NA	NA	NA	NA
ENSMUSG00000001672	MARVELD3	0.0309578	0	0.282173	0	1	NA
ENSMUSG00000001674	DDX18	3886.93	-0.137031	0.142312	-0.962895	0.3356	0.607861
ENSMUSG00000001687	UBL3	1352.34	0.018668	0.184132	0.101384	0.919246	0.971518
ENSMUSG00000001700	GRAMD3	66.124	0.655522	0.630928	1.03898	NA	NA
ENSMUSG00000001707	EEF1E1	1362.48	-0.203331	0.194167	-1.0472	0.295008	0.567808
ENSMUSG00000001729	AKT1	8321.97	-0.616465	0.15969	-3.86038	0.00011321	0.00225274
ENSMUSG00000001739	CLDN15	3.89644	-0.417947	0.621888	-0.672061	0.501545	0.744955
ENSMUSG00000001741	IL16	9219.36	-0.297588	0.167842	-1.77302	0.0762254	0.256276
ENSMUSG00000001750	TCIRG1	1741.25	0.30323	0.177742	1.70601	0.0880054	0.280498
ENSMUSG00000001751	NAGLU	565.131	-0.182689	0.206936	-0.88283	0.377328	0.645833
ENSMUSG00000001755	COASY	1054.76	0.0636743	0.170083	0.374371	0.708128	0.874617
ENSMUSG00000001761	SMO	5906.97	-0.725826	0.264838	-2.74064	0.00613199	0.0460313
ENSMUSG00000001763	TSPAN33	8.42562	-1.23129	0.563364	-2.1856	0.0288445	0.133699
ENSMUSG00000001767	CRNKL1	2136.86	-0.161887	0.12832	-1.26159	0.207097	0.467029
ENSMUSG00000001768	RIN2	15.7021	0.385433	0.426868	0.902932	0.366562	0.635819
ENSMUSG00000001773	FOLH1	0.0418921	0	0.282173	0	1	NA
ENSMUSG00000001774	CHORDC1	2748.67	-0.0112643	0.21101	-0.053383	0.957427	0.985402
ENSMUSG00000001783	RTCB	6498.37	0.0685945	0.115533	0.593722	0.552698	0.782041
ENSMUSG00000001785	PWP1	2667.29	0.0279039	0.119836	0.23285	0.815878	0.927608
ENSMUSG00000001786	FBXO7	1579.5	-0.113496	0.106523	-1.06547	0.286665	0.559686
ENSMUSG00000001794	CAPNS1	7762.86	0.141195	0.211478	0.667661	0.50435	0.746668
ENSMUSG00000001802	LRP3	0.093726	0.048088	0.282173	0.17042	0.86468	NA
ENSMUSG00000001804	DSG4	0	NA	NA	NA	NA	NA
ENSMUSG00000001815	EVX2	0	NA	NA	NA	NA	NA
ENSMUSG00000001819	HOXD13	0	NA	NA	NA	NA	NA
ENSMUSG00000001823	HOXD12	0	NA	NA	NA	NA	NA
ENSMUSG00000001827	FOLR1	0	NA	NA	NA	NA	NA
ENSMUSG00000001829	CLPB	1256.27	0.362045	0.12472	2.90286	0.00369773	0.0320029
ENSMUSG00000001833	SEPT7	6447.33	0.299738	0.223426	1.34156	0.17974	0.43164
ENSMUSG00000001844	ZDHHC4	1376.75	0.370367	0.139511	2.65474	0.00793689	0.055535
ENSMUSG00000001847	RAC1	9070.16	-0.351728	0.0948592	-3.7079	0.000208985	0.00364578
ENSMUSG00000001855	NUP214	4762.74	-0.14382	0.141112	-1.01919	0.308112	0.581101
ENSMUSG00000001864	AIF1L	14.8297	1.04496	0.581039	1.79844	0.0721075	0.247245
ENSMUSG00000001865	CPA3	9051.1	2.6029	0.557649	4.66764	3.04676e-06	0.000115213
ENSMUSG00000001870	LTBP1	3.11802	0.202394	0.67234	0.301029	0.763392	0.902865
ENSMUSG00000001891	UGP2	937.856	0.0269358	0.221101	0.121826	0.903037	0.965089
ENSMUSG00000001901	KCNH6	0.233394	0.048088	0.282173	0.17042	0.86468	NA
ENSMUSG00000001909	TRMT1	3355.47	0.424572	0.18573	2.28596	0.0222564	0.111952
ENSMUSG00000001910	NACC1	9319.04	0.0247829	0.168149	0.147387	0.882827	0.955599
ENSMUSG00000001911	NFIX	1339.72	-0.524812	0.26652	-1.96913	0.0489384	0.191386
ENSMUSG00000001918	SLC1A5	3542.11	0.0303408	0.126765	0.239347	0.810836	0.925618
ENSMUSG00000001924	UBA1	24759.2	-0.14208	0.151808	-0.935922	0.349313	0.621328
ENSMUSG00000001930	VWF	4.54865	0.809233	0.639454	1.26551	0.20569	0.465026
ENSMUSG00000001942	SIAE	1375.43	1.31776	0.225987	5.83116	5.50429e-09	5.07702e-07
ENSMUSG00000001943	VSIG2	0.507739	-0.183811	0.332729	-0.552435	0.580651	NA
ENSMUSG00000001946	ESAM	2.20164	1.02912	0.67147	1.53264	0.125364	NA
ENSMUSG00000001948	SPA17	21.7595	-0.608277	0.312926	-1.94384	0.0519151	0.198653
ENSMUSG00000001962	FAM50A	1373.11	0.0171882	0.103935	0.165374	0.868649	0.949401
ENSMUSG00000001964	EMD	2718.11	-0.32929	0.162914	-2.02125	0.0432535	0.175954
ENSMUSG00000001983	TACO1	521.927	0.04571	0.136689	0.334408	0.738071	0.891271
ENSMUSG00000001985	GRIK3	0	NA	NA	NA	NA	NA
ENSMUSG00000001986	GRIA3	1414.19	-0.116521	0.280695	-0.415115	0.678057	0.858174
ENSMUSG00000001988	NPAS1	0.457521	-0.2565	0.504248	-0.508679	0.610978	NA
ENSMUSG00000001995	SIPA1L2	283.205	-0.149849	0.333493	-0.449334	0.653191	0.843619
ENSMUSG00000001998	AP4E1	576.344	-0.332089	0.253273	-1.31119	0.189792	0.445401
ENSMUSG00000001999	BLVRA	565.023	-0.702676	0.143363	-4.90138	9.5164e-07	4.48803e-05
ENSMUSG00000002006	PDZD4	700.459	-1.30977	0.328699	-3.98471	6.75625e-05	0.00149003
ENSMUSG00000002007	SRPK3	0.193163	0.0924272	0.282173	0.327555	0.743248	NA
ENSMUSG00000002010	IDH3G	5089.86	-0.0724409	0.149162	-0.485654	0.627213	0.829327
ENSMUSG00000002012	PNCK	115.777	-1.20759	0.38548	-3.13269	0.00173211	0.0182791
ENSMUSG00000002014	SSR4	2616.95	-0.204775	0.174525	-1.17333	0.240665	0.509741
ENSMUSG00000002015	BCAP31	4139.55	0.125845	0.114019	1.10372	0.269713	0.542102
ENSMUSG00000002017	FAM98A	1540.71	0.0772344	0.136168	0.567202	0.570577	0.793287
ENSMUSG00000002020	LTBP2	0.303281	0.048088	0.282173	0.17042	0.86468	NA
ENSMUSG00000002028	KMT2A	11897.3	0.0431444	0.344008	0.125417	0.900194	0.964069
ENSMUSG00000002031	IFT46	1294.28	-0.344753	0.143807	-2.39733	0.0165151	0.0924019
ENSMUSG00000002032	TMEM25	8.92855	1.24491	0.523497	2.37805	0.0174043	0.0954548
ENSMUSG00000002033	CD3G	36200.9	-0.384491	0.218484	-1.75981	0.0784398	0.260193
ENSMUSG00000002043	TRAPPC6A	794.858	-0.118965	0.233237	-0.51006	0.61001	0.818593
ENSMUSG00000002052	SUPT6	7685.15	0.101131	0.123248	0.820548	0.411904	0.675315
ENSMUSG00000002055	SPAG5	1339.76	-0.156815	0.362186	-0.432968	0.665038	0.850129
ENSMUSG00000002057	FOXN1	4.67944	0.788164	0.641749	1.22815	0.219391	0.48251
ENSMUSG00000002058	UNC119	976.264	0.570732	0.306904	1.85964	0.062936	0.225379
ENSMUSG00000002059	RAB34	50.3814	-1.3576	0.539553	-2.51615	0.0118643	0.0733067
ENSMUSG00000002064	SDF2	1712.81	0.50142	0.204197	2.45557	0.0140662	0.082601
ENSMUSG00000002068	CCNE1	519.52	-0.689641	0.32087	-2.14928	0.0316122	0.142392
ENSMUSG00000002076	HSF2BP	46.3294	-0.758734	0.539362	-1.40673	0.159509	0.402874
ENSMUSG00000002083	BBC3	309.925	1.98924	0.307359	6.47205	9.668e-11	1.4808e-08
ENSMUSG00000002100	MYBPC3	0.445642	0.143795	0.366744	0.392087	0.694994	NA
ENSMUSG00000002102	PSMC3	6607.42	-0.283194	0.161812	-1.75015	0.0800932	0.263797
ENSMUSG00000002103	ACP2	1133.49	0.245899	0.162291	1.51517	0.129728	0.356102
ENSMUSG00000002104	RAPSN	266.201	0.752853	0.455164	1.65403	0.0981224	0.299863
ENSMUSG00000002105	SLC39A13	208.668	0.558998	0.24636	2.26903	0.0232665	0.115537
ENSMUSG00000002107	CELF2	8491.16	0.268946	0.204258	1.3167	0.187938	0.442606
ENSMUSG00000002108	NR1H3	66.0248	1.15332	0.339117	3.40095	0.000671531	0.00912222
ENSMUSG00000002109	DDB2	1091.09	-0.309152	0.134597	-2.29687	0.0216263	0.109675
ENSMUSG00000002111	SPI1	50.6636	0.169799	0.433323	0.391852	0.695167	0.86766
ENSMUSG00000002129	SF3A1	8162.73	-0.373466	0.152784	-2.44441	0.014509	0.0844882
ENSMUSG00000002147	STAT6	7569.57	-0.214647	0.157241	-1.36509	0.172226	0.421476
ENSMUSG00000002190	CLGN	1.17811	0.66282	0.625378	1.05987	0.289203	NA
ENSMUSG00000002204	NAPSA	519.772	1.86998	0.448252	4.17173	3.023e-05	0.000782465
ENSMUSG00000002205	VRK3	2868.24	0.0785689	0.162096	0.484707	0.627885	0.829708
ENSMUSG00000002210	SMG9	1322.67	0.0651097	0.183546	0.354732	0.722791	0.883
ENSMUSG00000002221	PAXIP1	1962.25	-0.3115	0.159013	-1.95896	0.0501179	0.194405
ENSMUSG00000002222	RMND5A	5502.51	0.130648	0.260954	0.500654	0.616614	0.822038
ENSMUSG00000002227	MOV10	2585.06	-0.48883	0.227239	-2.15117	0.0314624	0.142112
ENSMUSG00000002228	PPM1J	23.7748	0.921448	0.54951	1.67685	0.093571	0.291503
ENSMUSG00000002233	RHOC	26.3863	0.0233808	0.614414	0.0380539	0.969645	0.990224
ENSMUSG00000002240	PRR27	0	NA	NA	NA	NA	NA
ENSMUSG00000002249	TEAD3	20.0829	-1.01593	0.498957	-2.03611	0.0417394	0.172102
ENSMUSG00000002250	PPARD	1048.19	0.0122431	0.194257	0.0630251	0.949747	0.98204
ENSMUSG00000002257	DEF6	8108.43	-0.432524	0.172767	-2.50352	0.0122966	0.0753085
ENSMUSG00000002265	PEG3	0.444141	0.166631	0.366741	0.454357	0.649572	NA
ENSMUSG00000002266	ZIM1	0.0296678	0.048088	0.282173	0.17042	0.86468	NA
ENSMUSG00000002274	METRN	1249.22	-0.554265	0.216603	-2.5589	0.0105005	0.0674772
ENSMUSG00000002279	LMF1	698.229	0.218955	0.199827	1.09572	0.273201	0.545848
ENSMUSG00000002280	NARFL	865.455	0.0843714	0.175333	0.481208	0.630369	0.831312
ENSMUSG00000002289	ANGPTL4	558.668	-0.572811	0.283869	-2.01787	0.0436045	0.17708
ENSMUSG00000002297	DBF4	1323.06	-0.256184	0.295887	-0.865817	0.38659	0.653526
ENSMUSG00000002307	DAXX	2629.85	-0.401455	0.144949	-2.76963	0.00561202	0.043028
ENSMUSG00000002308	CD320	565.559	0.517435	0.231948	2.23082	0.0256928	0.123614
ENSMUSG00000002319	IPO4	2983.2	0.0454544	0.245699	0.185	0.853229	0.942917
ENSMUSG00000002320	TM9SF1	2073.75	0.0208401	0.0825893	0.252334	0.800783	0.921433
ENSMUSG00000002324	REC8	111.859	-0.0388512	0.593622	-0.0654477	0.947818	0.9812
ENSMUSG00000002325	IRF9	2854.4	-0.351043	0.268214	-1.30882	0.190597	0.446724
ENSMUSG00000002326	GMPR2	818.6	-0.395081	0.106702	-3.70267	0.00021334	0.00368327
ENSMUSG00000002329	MDP1	1606.17	0.168868	0.131171	1.28738	0.197961	0.455856
ENSMUSG00000002332	DHRS1	1298.36	0.0175566	0.184255	0.0952843	0.924089	0.973021
ENSMUSG00000002341	NCAN	0.0269766	0	0.282173	0	1	NA
ENSMUSG00000002342	TMEM161A	1017.83	0.11136	0.153075	0.727486	0.466928	0.71891
ENSMUSG00000002343	ARMC6	405.807	0.162025	0.205793	0.787323	0.431093	0.691251
ENSMUSG00000002345	BORCS8	1107.67	-0.703891	0.156689	-4.49229	7.04621e-06	0.000233406
ENSMUSG00000002346	SLC25A42	202.991	0.227106	0.246628	0.920845	0.357132	0.627381
ENSMUSG00000002365	SNX9	535.153	1.01609	0.293796	3.45848	0.00054323	0.0076469
ENSMUSG00000002372	RANBP3	3732.68	-0.241475	0.133678	-1.8064	0.0708566	0.244276
ENSMUSG00000002379	NDUFA11	1461.4	-0.57995	0.198734	-2.91822	0.00352036	0.0309492
ENSMUSG00000002384	BMP8B	1.95794	0.0780511	0.672685	0.116029	0.907629	NA
ENSMUSG00000002393	NR2F6	384.26	0.966018	0.262921	3.67418	0.000238612	0.00406908
ENSMUSG00000002395	USE1	3453.46	0.1466	0.210166	0.697543	0.485463	0.732819
ENSMUSG00000002396	OCEL1	688.405	-0.465475	0.171379	-2.71605	0.00660664	0.0488043
ENSMUSG00000002409	DYRK1B	1006.67	-0.0682085	0.269141	-0.253431	0.799935	0.921427
ENSMUSG00000002413	BRAF	1143.46	0.0395829	0.263706	0.150102	0.880684	0.95516
ENSMUSG00000002416	NDUFB2	982.006	-0.219601	0.191127	-1.14898	0.250564	0.521787
ENSMUSG00000002428	HLTF	1855.45	0.11517	0.209489	0.549768	0.582478	0.800949
ENSMUSG00000002455	PRPF6	3657.25	0.021988	0.0817518	0.268961	0.78796	0.915811
ENSMUSG00000002458	RGS19	2149.56	-0.153585	0.146064	-1.05149	0.293033	0.565401
ENSMUSG00000002459	RGS20	0.300985	-0.0405905	0.282173	-0.14385	NA	NA
ENSMUSG00000002475	ABHD3	1.31846	1.01561	0.642768	1.58006	0.114092	NA
ENSMUSG00000002477	SNRPD1	3286.03	-0.509189	0.213045	-2.39005	0.016846	0.0933127
ENSMUSG00000002486	TCHP	508.239	0.0238504	0.177337	0.134492	0.893013	0.960574
ENSMUSG00000002489	TIAM1	3183.47	0.452125	0.164681	2.74546	0.00604262	0.0455242
ENSMUSG00000002496	TSC2	3828.28	-0.037293	0.145438	-0.256419	0.797628	0.920594
ENSMUSG00000002500	RPL3L	33.4791	-1.19939	0.56142	-2.13636	0.0326503	0.145479
ENSMUSG00000002504	SLC9A3R2	18.2686	0.504691	0.490243	1.02947	0.303258	0.575853
ENSMUSG00000002524	PUF60	6583.48	-0.259647	0.145316	-1.78678	0.0739736	0.250861
ENSMUSG00000002546	GOLGA2	2467.84	0.121665	0.124206	0.979539	0.327314	0.599704
ENSMUSG00000002550	UCK1	2287.34	-0.162451	0.133357	-1.21817	0.223161	0.487924
ENSMUSG00000002565	SCIN	4775.31	-0.0920179	0.431225	-0.213387	0.831025	0.93425
ENSMUSG00000002578	IKZF4	598.461	0.602225	0.23769	2.53365	0.011288	0.0709273
ENSMUSG00000002580	MIEN1	1899.21	-0.128561	0.20922	-0.614478	0.538899	0.772382
ENSMUSG00000002588	PON1	0.0328834	-0.0405905	0.282173	-0.14385	0.885619	NA
ENSMUSG00000002602	AXL	694.212	0.37908	0.206254	1.83793	0.0660726	0.232964
ENSMUSG00000002603	TGFB1	9384.24	0.21549	0.231229	0.931935	0.35137	0.623504
ENSMUSG00000002608	CCDC97	2710.71	-0.37632	0.191531	-1.9648	0.0494374	0.192886
ENSMUSG00000002617	ZFP40	209.218	0.112207	0.366785	0.30592	0.759666	0.90101
ENSMUSG00000002625	AKAP8L	1173.01	-0.197756	0.176637	-1.11956	0.262901	0.535174
ENSMUSG00000002633	SHH	0	NA	NA	NA	NA	NA
ENSMUSG00000002635	PDCD2L	669.974	0.122782	0.168639	0.72808	0.466565	0.718637
ENSMUSG00000002658	GTF2F1	3203.95	-0.223548	0.147593	-1.51462	0.129869	0.356186
ENSMUSG00000002660	CLPP	1193.91	0.145457	0.18317	0.794111	0.427131	0.687984
ENSMUSG00000002661	ALKBH7	427.989	0.379924	0.222711	1.70591	0.0880245	0.280506
ENSMUSG00000002664	PSPN	0.0395512	0	0.282173	0	1	NA
ENSMUSG00000002668	DENND1C	1134.95	-0.197224	0.323377	-0.609887	0.541937	0.773897
ENSMUSG00000002679	MED6	410.035	-0.106587	0.207952	-0.512553	0.608264	0.817866
ENSMUSG00000002688	PRKD1	0.0490141	0	0.282173	0	1	NA
ENSMUSG00000002699	LCP2	15611.7	0.384697	0.176684	2.17731	0.0294572	0.135703
ENSMUSG00000002718	CSE1L	4743.76	-0.23221	0.229226	-1.01302	0.311051	0.583962
ENSMUSG00000002728	NAA20	1175.69	-0.365998	0.145282	-2.51923	0.0117612	0.0728584
ENSMUSG00000002731	PRKRA	609.646	-0.0571852	0.15296	-0.373858	0.70851	0.874651
ENSMUSG00000002732	FKBP7	63.8341	0.672436	0.236537	2.84283	0.00447145	0.0364862
ENSMUSG00000002733	PLEKHA3	667.841	-0.0943074	0.158451	-0.595185	0.55172	0.781583
ENSMUSG00000002741	YKT6	3164.34	-0.147139	0.119844	-1.22775	0.219539	0.48268
ENSMUSG00000002748	BAZ1B	9234.06	-0.140504	0.156786	-0.896151	0.370172	0.63845
ENSMUSG00000002763	PEX6	3909.63	0.0504217	0.225525	0.223574	0.823089	0.930946
ENSMUSG00000002767	MRPL2	1453.79	-0.317311	0.181307	-1.75013	0.0800951	0.263797
ENSMUSG00000002768	MEA1	1555.37	-0.138145	0.212892	-0.648898	0.516404	0.754936
ENSMUSG00000002769	GNMT	4.32372	0.827147	0.653523	1.26567	0.20563	0.464985
ENSMUSG00000002771	GRIN2D	10.6175	0.484362	0.443937	1.09106	0.275246	0.547813
ENSMUSG00000002778	KDELR1	2642.88	0.00221189	0.167857	0.0131772	0.989486	0.996535
ENSMUSG00000002781	TMEM143	443.515	0.567695	0.177363	3.20076	0.00137065	0.0154615
ENSMUSG00000002791	PDXK-PS	6.45076	0.607207	0.552896	1.09823	0.272104	0.544606
ENSMUSG00000002797	GGCT	194.293	0.298581	0.19852	1.50403	0.132573	0.36059
ENSMUSG00000002799	JAG2	181.276	-0.0749252	0.226559	-0.330709	0.740864	0.892383
ENSMUSG00000002803	BTBD6	678.365	-0.0499516	0.191503	-0.26084	0.794216	0.919114
ENSMUSG00000002804	NUDT14	717.939	-0.476205	0.201689	-2.36109	0.0182214	0.0981449
ENSMUSG00000002808	EPDR1	8.74855	-0.496662	0.638932	-0.777332	0.436963	0.695784
ENSMUSG00000002812	FLII	7701.18	-0.334613	0.149623	-2.23637	0.0253277	0.1226
ENSMUSG00000002814	TOP3A	1373.31	0.00119505	0.114422	0.0104443	0.991667	0.997162
ENSMUSG00000002820	ATG4D	1128.22	-0.22659	0.207713	-1.09088	0.275325	0.547813
ENSMUSG00000002825	QTRT1	501.348	-0.291686	0.192997	-1.51135	0.130699	0.357258
ENSMUSG00000002831	PLIN4	0.108847	-0.0405905	0.282173	-0.14385	0.885619	NA
ENSMUSG00000002833	HDGFRP2	3046.22	-0.17256	0.10978	-1.57188	0.115979	0.333005
ENSMUSG00000002835	CHAF1A	2605.13	-0.805285	0.286121	-2.8145	0.00488538	0.0390433
ENSMUSG00000002844	ADPRH	3008.11	-0.0987268	0.177998	-0.55465	0.579134	0.79926
ENSMUSG00000002845	TMEM39A	907.822	-0.0180697	0.113933	-0.1586	0.873984	0.952737
ENSMUSG00000002846	TIMMDC1	857.897	-0.0375385	0.139253	-0.26957	0.787491	0.915604
ENSMUSG00000002847	PLA1A	3.25572	0.623157	0.659853	0.944388	0.344972	0.616916
ENSMUSG00000002870	MCM2	11251.5	-0.989118	0.2476	-3.99481	6.47449e-05	0.00143548
ENSMUSG00000002871	TPRA1	914.637	0.221708	0.151576	1.46268	0.143555	0.378258
ENSMUSG00000002881	NAB1	1959.55	-0.279241	0.223101	-1.25163	0.210703	0.47192
ENSMUSG00000002885	ADGRE5	895.254	-0.373537	0.428677	-0.871372	0.383551	0.650949
ENSMUSG00000002897	IL17RA	7103.97	0.172331	0.163122	1.05645	0.290762	0.563467
ENSMUSG00000002900	LAMB1	13.3331	-1.60644	0.659673	-2.4352	0.0148835	0.0860742
ENSMUSG00000002908	KCNN1	1.7927	-0.817841	0.661287	-1.23674	0.216183	NA
ENSMUSG00000002910	ARRDC2	342.571	-0.448663	0.1834	-2.44636	0.0144307	0.0842672
ENSMUSG00000002930	PPP1R17	0	NA	NA	NA	NA	NA
ENSMUSG00000002944	CD36	2.65559	0.498974	0.672145	0.742361	0.457869	NA
ENSMUSG00000002948	MAP2K7	3890.76	0.158388	0.166085	0.953658	0.340257	0.612991
ENSMUSG00000002949	TIMM44	1819.25	-0.0441915	0.0882444	-0.500785	0.616523	0.821981
ENSMUSG00000002957	AP2A2	4750.05	0.066393	0.103315	0.642627	0.520466	0.758153
ENSMUSG00000002963	PNKP	1563.83	-0.00231982	0.212702	-0.0109064	0.991298	0.99705
ENSMUSG00000002968	MED25	2472.19	-0.12017	0.173854	-0.69121	0.489433	0.735803
ENSMUSG00000002980	BCAM	121.799	-0.658603	0.247657	-2.65934	0.00782947	0.0549907
ENSMUSG00000002981	CLPTM1	4698.38	0.114906	0.168967	0.68005	0.496473	0.741312
ENSMUSG00000002983	RELB	955.211	1.02797	0.240649	4.27167	1.94011e-05	0.000548986
ENSMUSG00000002984	TOMM40	2478.15	-0.437129	0.196835	-2.22079	0.0263649	0.125487
ENSMUSG00000002985	APOE	526.052	0.0105016	0.437562	0.0240002	0.980852	0.993979
ENSMUSG00000002992	APOC2	0.245963	0	0.291077	0	1	NA
ENSMUSG00000002996	HBP1	2677.82	0.664559	0.180543	3.6809	0.000232414	0.00397964
ENSMUSG00000002997	PRKAR2B	1118.53	0.110504	0.272142	0.406054	0.684703	0.861932
ENSMUSG00000003031	CDKN1B	2668.73	0.503956	0.165388	3.04712	0.00231046	0.0226103
ENSMUSG00000003032	KLF4	32.3313	2.38573	0.466082	5.11869	3.07661e-07	1.7008e-05
ENSMUSG00000003033	AP1M1	4440.69	-0.394202	0.154671	-2.54865	0.010814	0.068908
ENSMUSG00000003037	RAB8A	5380.36	-0.480048	0.134734	-3.56293	0.000366733	0.00563776
ENSMUSG00000003038	HMGN2	16668	-0.654252	0.257864	-2.5372	0.0111743	0.070398
ENSMUSG00000003039	FAM32A	3487.92	-0.226215	0.152328	-1.48505	0.137529	0.368311
ENSMUSG00000003051	ELF3	0.713707	0	0.430701	0	1	NA
ENSMUSG00000003053	CYP2C29	0	NA	NA	NA	NA	NA
ENSMUSG00000003062	STARD3NL	567.022	0.0175868	0.172921	0.101705	0.918991	0.971518
ENSMUSG00000003068	STK11	4105.44	-0.113441	0.123587	-0.917904	0.358669	0.628659
ENSMUSG00000003070	EFNA2	5.48729	-0.531956	0.642657	-0.827745	0.407815	0.672121
ENSMUSG00000003072	ATP5D	5775.47	-0.486791	0.209893	-2.31923	0.0203827	0.105614
ENSMUSG00000003099	PPP5C	4571.89	0.109623	0.148461	0.738396	0.460274	0.713554
ENSMUSG00000003119	CDK12	3486.85	-0.0474225	0.142044	-0.333857	0.738488	0.891271
ENSMUSG00000003123	LIPE	594.4	0.665799	0.197596	3.3695	0.000753034	0.00993046
ENSMUSG00000003131	PAFAH1B2	3206.19	-0.0833055	0.110234	-0.755716	0.449819	0.705353
ENSMUSG00000003134	TBC1D8	367.041	-1.09049	0.370234	-2.94542	0.00322519	0.0290424
ENSMUSG00000003135	CNOT11	2377.75	0.216502	0.100632	2.15142	0.0314429	0.142096
ENSMUSG00000003153	SLC2A3	2696.17	2.08585	0.217891	9.57292	1.0393e-21	1.73511e-18
ENSMUSG00000003154	FOXJ2	1405.23	0.607686	0.218333	2.7833	0.00538087	0.0418415
ENSMUSG00000003161	SRI	2961.54	-0.223146	0.140222	-1.59138	0.111524	0.324938
ENSMUSG00000003166	DGCR2	4170.27	0.129176	0.1222	1.05709	0.290472	0.563089
ENSMUSG00000003184	IRF3	2656.75	-0.401233	0.138099	-2.9054	0.00366781	0.0318498
ENSMUSG00000003190	BCL2L12	979.117	-0.481736	0.167782	-2.87121	0.00408909	0.0342535
ENSMUSG00000003198	ZFP959	286.733	0.183552	0.297794	0.616372	0.537649	0.771369
ENSMUSG00000003199	MPND	2209.28	-0.190022	0.172993	-1.09844	0.272012	0.544606
ENSMUSG00000003200	SH3GL1	2745.68	-0.10405	0.132625	-0.784544	0.432721	0.692588
ENSMUSG00000003206	EBI3	4.91953	0.482084	0.637659	0.756022	0.449636	0.705325
ENSMUSG00000003208	CCDC94	713.035	-0.146002	0.166313	-0.877877	0.38001	0.64797
ENSMUSG00000003226	RANBP2	8615.61	0.0700323	0.280637	0.249548	0.802937	0.922474
ENSMUSG00000003227	EDAR	3.95789	2.40112	0.656161	3.65935	0.000252858	0.00424837
ENSMUSG00000003228	GRK5	287.279	2.31386	0.201341	11.4922	1.44306e-30	8.03065e-27
ENSMUSG00000003233	DVL3	1007.33	0.280996	0.179143	1.56856	0.116751	0.334142
ENSMUSG00000003234	ABCF3	1905.98	-0.163068	0.132572	-1.23003	0.218687	0.481271
ENSMUSG00000003235	EIF2B5	3152.21	-0.196192	0.148178	-1.32403	0.185492	0.439199
ENSMUSG00000003269	CYTH2	2073.55	-0.110794	0.167676	-0.66076	0.508767	0.749745
ENSMUSG00000003271	SULT2B1	96.3456	-0.574365	0.314292	-1.82749	0.0676262	0.236444
ENSMUSG00000003273	CAR11	13.41	2.29997	0.602091	3.81998	0.000133464	0.00256228
ENSMUSG00000003279	DLGAP1	0.123402	0	0.282173	0	1	NA
ENSMUSG00000003282	PLAG1	24.0275	0.765324	0.473764	1.61541	0.106221	0.315171
ENSMUSG00000003283	HCK	31.8584	-0.0162516	0.463195	-0.0350858	0.972011	0.990744
ENSMUSG00000003299	MRPL4	1889.31	-0.18995	0.189953	-0.999983	0.317319	0.589876
ENSMUSG00000003308	KEAP1	3216.4	-0.291848	0.123151	-2.36984	0.0177959	0.0968107
ENSMUSG00000003309	AP1M2	19.4689	-0.543431	0.414375	-1.31145	0.189707	0.445346
ENSMUSG00000003316	GLG1	5886.94	0.605219	0.128198	4.72096	2.34728e-06	9.21294e-05
ENSMUSG00000003341	ATP8B3	3.3698	-0.328773	0.626624	-0.524674	0.59981	0.812066
ENSMUSG00000003344	BTBD2	2748.59	0.369786	0.19342	1.91182	0.0558988	0.208264
ENSMUSG00000003345	CSNK1G2	8364.16	-0.408731	0.164633	-2.48268	0.0130399	0.0783382
ENSMUSG00000003346	ABHD17A	2526.83	-0.302944	0.220174	-1.37593	0.168843	0.416823
ENSMUSG00000003348	MOB3A	9162.3	0.057142	0.254208	0.224784	0.822147	0.930938
ENSMUSG00000003352	CACNB3	121.173	-1.21827	0.489046	-2.49112	NA	NA
ENSMUSG00000003354	CCDC65	0.461811	-0.288809	0.333644	-0.86562	0.386698	NA
ENSMUSG00000003355	FKBP11	15.9759	-1.27706	0.517323	-2.46859	0.0135646	0.0804196
ENSMUSG00000003360	DDX23	4669.15	0.0333944	0.10117	0.33008	0.741339	0.892383
ENSMUSG00000003363	PLD3	8409.55	0.522573	0.314015	1.66416	0.0960798	0.296244
ENSMUSG00000003378	GRIK5	289.923	1.83937	0.383535	4.79582	1.6201e-06	6.88235e-05
ENSMUSG00000003379	CD79A	4.99852	-0.123346	0.672532	-0.183406	NA	NA
ENSMUSG00000003380	RABAC1	2290.88	0.661847	0.213385	3.10166	0.00192439	0.0197702
ENSMUSG00000003382	ETV3	4369.86	0.484191	0.218179	2.21924	0.0264706	0.125905
ENSMUSG00000003402	PRKCSH	5086.64	0.0786553	0.177374	0.443444	0.657444	0.845351
ENSMUSG00000003410	ELAVL3	4.31589	0.316929	0.667471	0.474821	0.634915	0.833701
ENSMUSG00000003411	RAB3B	1.22737	0.685106	0.627286	1.09217	0.274756	NA
ENSMUSG00000003418	ST8SIA6	31.6434	2.31955	0.578454	4.00992	6.07391e-05	0.00136479
ENSMUSG00000003420	FCGRT	21.437	-0.848605	0.507539	-1.672	0.0945241	0.293177
ENSMUSG00000003421	NOSIP	2329.28	0.0621812	0.176087	0.353129	0.723992	0.883685
ENSMUSG00000003423	PIH1D1	1373.05	-0.158553	0.1692	-0.937079	0.348718	0.6206
ENSMUSG00000003429	RPS11	42833.8	-0.222474	0.157635	-1.41133	0.158148	0.400852
ENSMUSG00000003435	SUPT5	9238.5	-0.0424841	0.133051	-0.319308	0.749493	0.895408
ENSMUSG00000003436	DLL3	0.401644	-0.092739	0.415993	-0.222934	0.823587	NA
ENSMUSG00000003437	PAF1	2324.45	-0.0575661	0.124577	-0.462094	0.644014	0.838722
ENSMUSG00000003438	TIMM50	1878.35	-0.308364	0.204514	-1.50779	0.131608	0.359076
ENSMUSG00000003444	MED29	646.334	-0.545317	0.201253	-2.7096	0.00673635	0.049326
ENSMUSG00000003452	BICD1	76.6517	0.182037	0.500275	0.363875	0.715952	0.87953
ENSMUSG00000003458	NCSTN	3406.62	0.118314	0.162561	0.727814	0.466728	0.718787
ENSMUSG00000003464	PEX19	2054.33	-0.0454796	0.118552	-0.383626	0.701256	0.87063
ENSMUSG00000003469	PHYHIP	1.09154	0.4774	0.639866	0.746093	0.455611	NA
ENSMUSG00000003476	CRHR2	0	NA	NA	NA	NA	NA
ENSMUSG00000003477	INMT	4.76422	-0.722955	0.661493	-1.09291	0.274431	0.54693
ENSMUSG00000003484	CYP4F18	1.89032	0.526482	0.666412	0.790025	0.429513	NA
ENSMUSG00000003500	IMPDH1	6382.61	-0.545118	0.17576	-3.10149	0.00192551	0.0197702
ENSMUSG00000003505	PSG18	0	NA	NA	NA	NA	NA
ENSMUSG00000003518	DUSP3	8.86288	0.559266	0.56198	0.995171	0.319653	0.592101
ENSMUSG00000003526	PRODH	513.189	-0.699271	0.400019	-1.74809	0.0804478	0.264489
ENSMUSG00000003527	DGCR14	1385.02	-0.173264	0.186025	-0.931399	0.351647	0.623729
ENSMUSG00000003528	SLC25A1	1912.12	-0.116888	0.181864	-0.642723	0.520404	0.758128
ENSMUSG00000003531	DGCR6	1119.37	-0.637863	0.225285	-2.83136	0.00463511	0.0374737
ENSMUSG00000003534	DDR1	9.1929	0.224644	0.587518	0.38236	0.702194	0.870865
ENSMUSG00000003541	IER3	66.0561	1.08622	0.45583	2.38295	0.0171747	0.0945375
ENSMUSG00000003545	FOSB	199.414	0.785574	0.329589	2.3835	0.0171489	0.0944266
ENSMUSG00000003546	KLC4	826.531	0.422018	0.218719	1.9295	0.0536693	0.202763
ENSMUSG00000003549	ERCC1	742.083	0.145106	0.20463	0.709118	0.478251	0.726846
ENSMUSG00000003555	CYP17A1	0	NA	NA	NA	NA	NA
ENSMUSG00000003559	AS3MT	755.357	-0.477738	0.288974	-1.65322	0.0982855	0.300087
ENSMUSG00000003573	HOMER3	1243.07	-0.637332	0.150356	-4.23882	2.24693e-05	0.000615968
ENSMUSG00000003575	CRTC1	2939.67	0.320008	0.187322	1.70833	0.087575	0.279714
ENSMUSG00000003581	RNF215	450.275	0.705032	0.219852	3.20685	0.00134198	0.0152722
ENSMUSG00000003585	SEC14L2	28.0233	0.589169	0.309325	1.90469	0.0568198	0.210848
ENSMUSG00000003604	AVEN	707.922	-0.124094	0.098358	-1.26165	0.207074	0.467029
ENSMUSG00000003617	CP	1.57938	-0.573974	0.638838	-0.898465	0.368938	NA
ENSMUSG00000003623	CROT	1503.74	0.133063	0.227991	0.583632	0.559468	0.785707
ENSMUSG00000003644	RPS6KA1	6382.21	-0.166104	0.272007	-0.610661	0.541424	0.773695
ENSMUSG00000003657	CALB2	0	NA	NA	NA	NA	NA
ENSMUSG00000003660	SNRNP200	13041.6	-0.12633	0.0984618	-1.28303	0.199481	0.457262
ENSMUSG00000003662	CIAO1	1770.27	-0.0885556	0.122949	-0.72026	0.471365	0.722099
ENSMUSG00000003665	HAS1	0.0563155	0	0.282173	0	1	NA
ENSMUSG00000003680	TAF6L	1460.29	-0.111206	0.13273	-0.837838	0.402122	0.667471
ENSMUSG00000003721	INSIG2	504.592	0.0379251	0.141504	0.268014	0.788689	0.916144
ENSMUSG00000003731	KPNA6	3311.14	0.0935951	0.0959942	0.975008	0.329556	0.602091
ENSMUSG00000003746	MAN1A	3010.53	0.560079	0.238573	2.34762	0.0188938	0.100841
ENSMUSG00000003752	ITPKC	520.919	0.121883	0.191982	0.634867	0.525515	0.761785
ENSMUSG00000003762	COQ8B	600.753	0.025051	0.208667	0.120052	0.904442	0.965089
ENSMUSG00000003778	BRD8	2481.28	0.0776186	0.138244	0.561459	0.574484	0.796199
ENSMUSG00000003779	KIF20A	1994.27	-0.451471	0.357367	-1.26333	0.206472	0.466173
ENSMUSG00000003808	FARSA	2525.06	-0.270325	0.144946	-1.86501	0.06218	0.223535
ENSMUSG00000003809	GCDH	668.649	-0.737968	0.14987	-4.92406	8.4769e-07	4.05507e-05
ENSMUSG00000003810	MAST2	2355.99	0.0176337	0.200288	0.088042	0.929843	0.975178
ENSMUSG00000003812	DNASE2A	466.555	0.0906671	0.133895	0.677152	0.49831	0.742329
ENSMUSG00000003813	RAD23A	2662.43	-0.435975	0.136771	-3.18762	0.00143451	0.0159449
ENSMUSG00000003814	CALR	23907.3	0.322764	0.151679	2.12795	0.0333415	0.147375
ENSMUSG00000003824	SYCE2	1407.84	-0.790189	0.319709	-2.47159	0.0134514	0.0799684
ENSMUSG00000003847	NFAT5	2226.07	0.48649	0.295849	1.64439	0.100096	0.303286
ENSMUSG00000003848	NOB1	2600.07	0.249708	0.159581	1.56477	0.117636	0.335535
ENSMUSG00000003849	NQO1	50.5194	-0.21283	0.440179	-0.483508	0.628735	0.830361
ENSMUSG00000003863	PPFIA3	2.27986	-0.843582	0.664208	-1.27006	0.204064	NA
ENSMUSG00000003865	GYS1	1113.58	-0.0230138	0.187032	-0.123048	0.902069	0.965017
ENSMUSG00000003868	RUVBL2	3893.99	-0.174872	0.171938	-1.01706	0.309124	0.581961
ENSMUSG00000003872	LIN7B	1.2097	1.07312	0.590196	1.81824	0.0690279	NA
ENSMUSG00000003873	BAX	1938.38	-0.0344138	0.163462	-0.21053	0.833254	0.93425
ENSMUSG00000003882	IL7R	5378.02	0.512542	0.245878	2.08453	0.0371116	0.159233
ENSMUSG00000003923	TFAM	2105.16	-0.362574	0.161086	-2.25082	0.0243971	0.119446
ENSMUSG00000003929	ZFP81	910.055	0.0639611	0.261348	0.244735	0.806661	0.923717
ENSMUSG00000003934	EFNB3	38.6282	0.0560099	0.327783	0.170875	0.864322	0.947712
ENSMUSG00000003948	MMD	2005.7	0.563056	0.228756	2.46138	0.0138404	0.0815909
ENSMUSG00000003949	HLF	11.0315	0.216922	0.535316	0.405222	0.685314	0.862261
ENSMUSG00000003955	FAM162A	1058.98	-0.313774	0.203348	-1.54304	0.122821	0.344274
ENSMUSG00000003970	RPL8	49856.4	-0.387795	0.18185	-2.1325	0.0329658	0.146257
ENSMUSG00000003974	GRM3	0	NA	NA	NA	NA	NA
ENSMUSG00000003992	SSBP2	1573.62	0.394211	0.208307	1.89246	0.0584303	0.214206
ENSMUSG00000004018	FANCL	359.576	-1.03078	0.216231	-4.76702	1.86972e-06	7.70742e-05
ENSMUSG00000004031	BRINP2	0	NA	NA	NA	NA	NA
ENSMUSG00000004032	GSTM5	1.254	-1.05039	0.651324	-1.61269	0.106811	NA
ENSMUSG00000004035	GSTM7	49.6388	0.393075	0.528759	0.743392	0.457244	0.711037
ENSMUSG00000004038	GSTM3	0	NA	NA	NA	NA	NA
ENSMUSG00000004040	STAT3	9957.35	0.276779	0.179799	1.53937	0.123713	0.345811
ENSMUSG00000004043	STAT5A	8862.19	0.00293011	0.138294	0.0211876	0.983096	0.994607
ENSMUSG00000004044	PTRF	15.1409	0.68534	0.526806	1.30094	0.193281	0.450736
ENSMUSG00000004054	MAP3K11	3680.91	-0.189895	0.203682	-0.932313	0.351175	0.623348
ENSMUSG00000004056	AKT2	7608.04	-0.321338	0.18425	-1.74404	0.0811528	0.265699
ENSMUSG00000004069	DNAJA3	1961.51	0.0334093	0.108074	0.309133	0.75722	0.899579
ENSMUSG00000004070	HMOX2	3069.7	-0.206308	0.136161	-1.51518	0.129728	0.356102
ENSMUSG00000004071	CDIP1	1559.17	-0.175649	0.144055	-1.21933	0.222721	0.487457
ENSMUSG00000004085	MAP3K20	203.105	-0.753126	0.444733	-1.69344	0.0903726	0.284996
ENSMUSG00000004096	CWC15	2687.91	-0.244227	0.142025	-1.7196	0.0855046	0.275313
ENSMUSG00000004098	COL5A3	0.270685	0.048088	0.282173	0.17042	0.86468	NA
ENSMUSG00000004099	DNMT1	18055.5	-0.512172	0.207766	-2.46514	0.0136961	0.0811127
ENSMUSG00000004100	PPAN	2438.67	-0.381049	0.23687	-1.60869	0.107684	0.317407
ENSMUSG00000004105	ANGPTL2	3097.85	-1.98575	0.232785	-8.53038	1.45868e-17	1.15965e-14
ENSMUSG00000004110	CACNA1E	12.0782	0.133481	0.632451	0.211053	NA	NA
ENSMUSG00000004113	CACNA1B	0.624086	-0.23496	0.4363	-0.538529	0.590212	NA
ENSMUSG00000004127	TRMT10A	383.977	-0.441034	0.206804	-2.13261	0.0329564	0.146254
ENSMUSG00000004151	ETV1	36.2814	0.469431	0.545471	0.860597	0.38946	0.656374
ENSMUSG00000004187	KIFC2	117.114	0.467869	0.314209	1.48904	0.136478	0.36679
ENSMUSG00000004207	PSAP	21537.8	0.242992	0.161458	1.50499	0.132328	0.360218
ENSMUSG00000004221	IKBKG	1942.06	0.222732	0.141399	1.5752	0.115209	0.33193
ENSMUSG00000004231	PAX2	0.312127	0	0.282173	0	1	NA
ENSMUSG00000004233	WARS2	391.752	0.39562	0.155629	2.54208	0.0110194	0.0697545
ENSMUSG00000004263	ATN1	2336.61	0.72873	0.254105	2.86783	0.00413292	0.0345341
ENSMUSG00000004264	PHB2	7779.11	-0.204978	0.181252	-1.1309	0.258095	0.530686
ENSMUSG00000004266	PTPN6	11633.8	0.28666	0.220565	1.29966	0.193717	0.450969
ENSMUSG00000004267	ENO2	36.1271	2.10537	0.435796	4.83108	1.35797e-06	5.96614e-05
ENSMUSG00000004268	EMG1	4413.49	-0.880173	0.129686	-6.78694	1.1454e-11	2.30391e-09
ENSMUSG00000004270	LPCAT3	2088.59	0.176188	0.17101	1.03028	0.302881	0.575397
ENSMUSG00000004285	ATP6V1F	3319.36	-0.140275	0.186262	-0.753102	0.451389	0.70667
ENSMUSG00000004296	IL12B	0.620598	-0.0113817	0.431235	-0.0263934	0.978944	NA
ENSMUSG00000004317	CLCN5	867.985	0.685294	0.246078	2.78486	0.00535504	0.0417267
ENSMUSG00000004319	CLCN3	2082.99	0.624131	0.201539	3.09682	0.00195607	0.0200102
ENSMUSG00000004328	HIF3A	454.282	0.0199701	0.23619	0.0845511	0.932618	0.976147
ENSMUSG00000004341	GPX6	0	NA	NA	NA	NA	NA
ENSMUSG00000004344	GPX5	0	NA	NA	NA	NA	NA
ENSMUSG00000004347	PDE1C	2.60116	-0.328732	0.669407	-0.491079	0.623371	NA
ENSMUSG00000004356	UTP20	3240.43	-0.0903836	0.219352	-0.412048	0.680304	0.859389
ENSMUSG00000004359	SPIC	14.3784	0.446065	0.565526	0.788762	0.430251	0.69081
ENSMUSG00000004360	9330159F19RIK	0.0664731	0	0.282173	0	1	NA
ENSMUSG00000004364	CUL3	5216.9	0.104812	0.227449	0.460814	0.644932	0.839168
ENSMUSG00000004366	SST	0	NA	NA	NA	NA	NA
ENSMUSG00000004371	IL11	0.455085	0.121771	0.420405	0.289651	0.772083	NA
ENSMUSG00000004383	LARGE1	248.883	0.798308	0.312838	2.55182	0.0107161	0.0684411
ENSMUSG00000004393	DDX56	2077.73	-0.268038	0.170751	-1.56976	0.116471	0.333661
ENSMUSG00000004394	TMED4	1605.25	0.538281	0.111931	4.80903	1.51667e-06	6.51986e-05
ENSMUSG00000004415	COL26A1	0.640894	-0.108287	0.46476	-0.232996	0.815765	NA
ENSMUSG00000004446	BID	906.834	-0.135252	0.207717	-0.651134	0.51496	0.754126
ENSMUSG00000004451	RALB	961.639	-0.242119	0.201561	-1.20122	0.229667	0.496144
ENSMUSG00000004455	PPP1CC	10486.2	-0.321302	0.119657	-2.6852	0.00724863	0.0519828
ENSMUSG00000004460	DNAJB11	3052.09	0.0120983	0.102451	0.118088	0.905998	0.965519
ENSMUSG00000004462	TBCCD1	589.809	0.250923	0.10096	2.48537	0.0129415	0.078056
ENSMUSG00000004473	CLEC11A	190.218	-1.03462	0.369259	-2.80189	0.00508037	0.0403176
ENSMUSG00000004500	ZFP324	719.91	-0.0594017	0.16884	-0.351823	0.724971	0.884363
ENSMUSG00000004508	GAB2	556.484	1.51426	0.277387	5.45901	4.78798e-08	3.38328e-06
ENSMUSG00000004530	CORO1C	5802.67	-0.476709	0.189552	-2.51492	0.0119059	0.0735095
ENSMUSG00000004535	TAX1BP1	6659.45	0.149114	0.230035	0.648223	0.516841	0.755178
ENSMUSG00000004540	PSG17	4.27687	0	0.290455	0	NA	NA
ENSMUSG00000004542	PSG19	0.0423077	0	0.282173	0	1	NA
ENSMUSG00000004552	CTSE	5949.34	-0.0623773	0.660244	-0.0944762	0.924731	0.973232
ENSMUSG00000004558	NDRG2	398.775	0.558078	0.323105	1.72723	0.0841257	0.271712
ENSMUSG00000004561	METTL17	876.794	0.252698	0.123436	2.0472	0.0406384	0.169336
ENSMUSG00000004562	ARHGEF40	318.037	1.09102	0.344513	3.16685	0.00154101	0.0167713
ENSMUSG00000004565	PNPLA6	847.778	1.03892	0.181266	5.73148	9.95585e-09	8.70224e-07
ENSMUSG00000004567	MCOLN1	789.305	0.186905	0.188578	0.991125	0.321625	0.594079
ENSMUSG00000004568	ARHGEF18	3696.81	-0.250742	0.272134	-0.921393	0.356845	0.627381
ENSMUSG00000004591	PKN2	2238.6	0.044339	0.211678	0.209464	0.834086	0.934505
ENSMUSG00000004609	CD33	11.9252	-0.0955625	0.562654	-0.169842	0.865134	0.948043
ENSMUSG00000004610	ETFB	2403.04	-0.198734	0.195635	-1.01584	0.309706	0.582547
ENSMUSG00000004612	NKG7	6811	0.904296	0.303765	2.97696	0.00291124	0.0270974
ENSMUSG00000004613	LIM2	0	NA	NA	NA	NA	NA
ENSMUSG00000004626	STXBP2	3967.87	-0.209119	0.180565	-1.15814	0.246807	0.517514
ENSMUSG00000004630	PCP2	0.898594	0	0.563303	0	1	NA
ENSMUSG00000004631	SGCE	0.564162	-0.742229	0.513144	-1.44643	0.148055	NA
ENSMUSG00000004633	CHN2	1124.01	0.968735	0.558529	1.73444	0.0828399	0.269045
ENSMUSG00000004637	WWOX	746.038	-0.0786212	0.241062	-0.326145	0.744315	0.893579
ENSMUSG00000004642	SLBP	4314.53	-0.566471	0.23923	-2.3679	0.0178894	0.0970634
ENSMUSG00000004651	TYR	0	NA	NA	NA	NA	NA
ENSMUSG00000004654	GHRHR	0	NA	NA	NA	NA	NA
ENSMUSG00000004655	AQP1	2.4647	-0.20595	0.669519	-0.30761	0.758379	NA
ENSMUSG00000004661	ARID3B	665.615	0.0628627	0.204314	0.307677	0.758328	0.900319
ENSMUSG00000004665	CNN2	11031.2	-0.665345	0.292164	-2.2773	0.0227684	0.113638
ENSMUSG00000004667	POLR2E	2312.41	-0.140611	0.170148	-0.8264	0.408577	0.67237
ENSMUSG00000004668	ABCA13	0.433722	0.107435	0.468114	0.229505	0.818476	NA
ENSMUSG00000004677	MYO9B	7281.14	-0.0631453	0.139882	-0.451418	0.651688	0.842948
ENSMUSG00000004698	HDAC9	308.246	0.516034	0.469812	1.09839	0.272036	0.544606
ENSMUSG00000004707	LY9	2772.11	0.184704	0.252261	0.732194	0.46405	0.716946
ENSMUSG00000004709	CD244	93.9218	1.82345	0.574771	3.17248	0.00151145	0.0165339
ENSMUSG00000004730	ADGRE1	38.5329	0.76899	0.441915	1.74013	0.0818359	0.267
ENSMUSG00000004748	MTFP1	166.367	0.673402	0.252741	2.6644	0.00771262	0.0543989
ENSMUSG00000004768	RAB23	91.3483	0.181342	0.239053	0.758582	0.448102	0.703906
ENSMUSG00000004771	RAB11A	1558.65	-0.028217	0.138221	-0.204145	0.83824	0.935769
ENSMUSG00000004788	EIF2B2	2780.61	-0.131257	0.194642	-0.674351	0.500088	0.74385
ENSMUSG00000004789	DLST	4270.74	0.0324499	0.130655	0.248363	0.803854	0.922931
ENSMUSG00000004791	PGF	10.1257	-0.716839	0.645253	-1.11094	0.266593	0.538314
ENSMUSG00000004798	ULK2	1687.61	-0.027036	0.21056	-0.1284	0.897832	0.962804
ENSMUSG00000004814	CCL24	0.580413	-0.0871374	0.283182	-0.307708	0.758304	NA
ENSMUSG00000004815	DGKQ	530.438	-0.105964	0.166123	-0.637865	0.523562	0.760526
ENSMUSG00000004821	TMED11	0	NA	NA	NA	NA	NA
ENSMUSG00000004837	GRAP	2355.2	0.118906	0.237924	0.499764	0.617241	0.822545
ENSMUSG00000004842	POU1F1	0.0841244	0	0.282173	0	1	NA
ENSMUSG00000004843	CHMP2B	1372.73	0.216602	0.180065	1.20291	0.229011	0.495188
ENSMUSG00000004846	PLOD3	850.489	0.481841	0.248972	1.93532	0.0529509	0.201095
ENSMUSG00000004849	AP1S1	1897.05	-0.420956	0.158101	-2.66258	0.00775444	0.0545786
ENSMUSG00000004864	MAPK13	1.30665	0.770073	0.639581	1.20403	0.228579	NA
ENSMUSG00000004865	SRPK1	5366.15	-0.0587228	0.153105	-0.383547	0.701314	0.87063
ENSMUSG00000004872	PAX3	0.0296105	0	0.282173	0	1	NA
ENSMUSG00000004880	LBR	10578.3	-0.254922	0.170985	-1.4909	0.135988	0.366107
ENSMUSG00000004885	CRABP2	1.70036	0.947016	0.668713	1.41618	0.156724	NA
ENSMUSG00000004891	NES	19.2661	0.00790011	0.51727	0.0152727	0.987815	0.995747
ENSMUSG00000004892	BCAN	0.499239	0.0878476	0.334496	0.262627	0.792838	NA
ENSMUSG00000004894	HAPLN2	0.0563155	0	0.282173	0	1	NA
ENSMUSG00000004895	PRCC	2914.65	-0.0160515	0.169574	-0.0946578	0.924587	0.973203
ENSMUSG00000004896	RRNAD1	668.024	0.299353	0.147341	2.0317	0.0421844	0.173439
ENSMUSG00000004897	HDGF	12339.7	-0.031657	0.168374	-0.188016	0.850864	0.941738
ENSMUSG00000004902	SLC25A18	0.0619156	0	0.282173	0	1	NA
ENSMUSG00000004929	THOP1	1242.15	-0.560132	0.25242	-2.21905	0.0264834	0.125925
ENSMUSG00000004931	APBA3	903.988	-0.0262378	0.23492	-0.111688	0.911071	0.967701
ENSMUSG00000004933	MATK	774.308	0.280378	0.296897	0.944362	0.344985	0.616916
ENSMUSG00000004934	PIAS4	1271.25	-0.0270275	0.160767	-0.168116	0.866492	0.948519
ENSMUSG00000004936	MAP2K1	1953.31	0.110179	0.110494	0.99715	0.318692	0.591266
ENSMUSG00000004937	SGTA	2745.08	-0.223955	0.180888	-1.23809	0.215683	0.477353
ENSMUSG00000004939	NMRK2	0.0264254	0	0.282173	0	1	NA
ENSMUSG00000004945	TMEM242	3320.32	-0.338179	0.20474	-1.65175	0.0985861	0.300455
ENSMUSG00000004947	DTX2	1309.21	0.0555315	0.211734	0.26227	0.793114	0.918432
ENSMUSG00000004948	ZP3	0.0849964	0	0.282173	0	1	NA
ENSMUSG00000004951	HSPB1	0.246034	0.136766	0.282173	0.48469	0.627896	NA
ENSMUSG00000004952	RASA4	1220.88	-0.377424	0.471018	-0.801294	0.422961	0.684128
ENSMUSG00000004961	SYT5	8.87221	0.867198	0.610402	1.4207	0.155404	0.396708
ENSMUSG00000004980	HNRNPA2B1	27425.8	-0.184468	0.205046	-0.899644	0.36831	0.636986
ENSMUSG00000004988	FXYD4	1.42994	-0.0631941	0.498105	-0.126869	0.899044	NA
ENSMUSG00000004994	CCDC130	434.669	0.238428	0.170502	1.39839	0.161996	0.407185
ENSMUSG00000004996	MRI1	1511.61	-0.156237	0.185997	-0.839996	0.400911	0.665924
ENSMUSG00000005034	PRKACB	8737.42	0.702681	0.189097	3.71599	0.000202413	0.00355849
ENSMUSG00000005043	SGSH	1534.16	0.28516	0.339856	0.839061	0.401435	0.666662
ENSMUSG00000005045	CHD5	6.66482	0.815935	0.63556	1.28381	0.19921	0.457185
ENSMUSG00000005054	CSTB	1246.2	-0.147109	0.186209	-0.79002	0.429516	0.69036
ENSMUSG00000005057	SH2B2	130.436	-0.251592	0.424631	-0.592495	0.553519	0.782305
ENSMUSG00000005069	PEX5	2290.93	0.447063	0.164513	2.71749	0.00657788	0.0486781
ENSMUSG00000005078	JKAMP	570.743	0.207753	0.18504	1.12275	0.261544	0.533865
ENSMUSG00000005087	CD44	199.262	1.33915	0.463701	2.88797	0.00387741	0.0330947
ENSMUSG00000005089	SLC1A2	0.390909	-0.14412	0.362063	-0.398051	0.690593	NA
ENSMUSG00000005102	EIF2AK4	851.774	-0.29388	0.125376	-2.34399	0.0190785	0.101567
ENSMUSG00000005103	WDR1	12093.3	-0.478705	0.162693	-2.94239	0.00325689	0.0292489
ENSMUSG00000005107	SLC2A9	620.304	0.0784694	0.214936	0.365082	0.71505	0.878973
ENSMUSG00000005124	WISP1	0.0541748	0.048088	0.282173	0.17042	0.86468	NA
ENSMUSG00000005125	NDRG1	5440.95	-0.658413	0.345786	-1.90411	0.0568964	0.210945
ENSMUSG00000005131	4930550C14RIK	8.10886	0.32613	0.619009	0.526859	0.598292	0.811175
ENSMUSG00000005142	MAN2B1	4938.84	-0.131947	0.175458	-0.752014	0.452043	0.707184
ENSMUSG00000005148	KLF5	1.82585	0.0899607	0.662659	0.135757	0.892013	NA
ENSMUSG00000005150	WDR83	746.572	-0.0231129	0.0937711	-0.246483	0.805309	0.92344
ENSMUSG00000005161	PRDX2	8513.27	-0.314814	0.19676	-1.59999	0.1096	0.321352
ENSMUSG00000005198	POLR2A	20458.9	0.227318	0.128038	1.7754	0.0758319	0.255502
ENSMUSG00000005202	SHBG	0	NA	NA	NA	NA	NA
ENSMUSG00000005204	SENP3	3983.66	0.0505554	0.123781	0.408427	0.68296	0.860924
ENSMUSG00000005220	CORIN	0.111665	0	0.282173	0	1	NA
ENSMUSG00000005225	PLEKHA8	49.0791	0.971254	0.57672	1.6841	0.0921623	0.288532
ENSMUSG00000005232	G6PC2	0.024507	0	0.282173	0	1	NA
ENSMUSG00000005233	SPC25	772.529	-0.325628	0.409523	-0.79514	0.426532	0.687285
ENSMUSG00000005237	DNAH2	1.2151	-0.433569	0.56388	-0.768903	0.441951	NA
ENSMUSG00000005251	RIPK4	4.28111	1.21827	0.62339	1.95427	0.0506692	0.195634
ENSMUSG00000005262	UFD1L	1623.67	0.0385399	0.0807401	0.477332	0.633125	0.832973
ENSMUSG00000005267	ZFP287	181.086	-0.625853	0.22311	-2.80513	0.00502963	0.0400236
ENSMUSG00000005268	PRLR	1.23918	1.12837	0.6323	1.78454	0.0743353	NA
ENSMUSG00000005299	LETM1	3611.75	0.23503	0.103765	2.26503	0.0235106	0.116437
ENSMUSG00000005312	UBQLN1	4788.25	-0.0444567	0.0923106	-0.481599	0.630091	0.831312
ENSMUSG00000005320	FGFR4	0.275618	0.0527596	0.294867	0.178927	0.857995	NA
ENSMUSG00000005338	CADM3	0.199401	0.00374873	0.282173	0.0132852	0.9894	NA
ENSMUSG00000005339	FCER1A	0.829273	0	0.283793	0	NA	NA
ENSMUSG00000005354	TXN2	3799.81	-0.13016	0.154167	-0.844274	0.398516	0.664119
ENSMUSG00000005355	CASP14	0	NA	NA	NA	NA	NA
ENSMUSG00000005357	SLC1A6	0.158866	0	0.282173	0	1	NA
ENSMUSG00000005360	SLC1A3	5.78259	0.630754	0.625728	1.00803	0.313439	0.586315
ENSMUSG00000005362	CRBN	2270.11	0.309316	0.190516	1.62357	0.104468	0.311446
ENSMUSG00000005364	IL5RA	5.69119	-0.50849	0.672595	-0.756012	0.449642	0.705325
ENSMUSG00000005370	MSH6	6451.07	-0.362033	0.157855	-2.29345	0.0218223	0.110334
ENSMUSG00000005371	FBXO11	1779.03	0.262347	0.243583	1.07703	0.281466	0.554076
ENSMUSG00000005373	MLXIPL	1.73743	-0.147794	0.641027	-0.230558	0.817658	NA
ENSMUSG00000005374	TBL2	1627.45	0.404005	0.136614	2.95728	0.00310369	0.0282531
ENSMUSG00000005378	WBSCR22	1708.94	-0.0503779	0.147243	-0.342142	0.732244	0.888713
ENSMUSG00000005397	NID1	1.98503	0	0.446207	0	NA	NA
ENSMUSG00000005410	MCM5	10757.4	-0.804272	0.290083	-2.77256	0.0055618	0.0427309
ENSMUSG00000005413	HMOX1	51.598	-0.0464406	0.282625	-0.164319	0.86948	0.949898
ENSMUSG00000005417	MPRIP	7707.64	-0.464936	0.120272	-3.86571	0.000110767	0.00221601
ENSMUSG00000005442	CIC	8391.38	-0.183273	0.236634	-0.774499	0.438636	0.697431
ENSMUSG00000005447	PAFAH1B3	1385.84	-0.45372	0.184434	-2.46006	0.0138912	0.0818039
ENSMUSG00000005465	IL27RA	3272.62	0.250441	0.176571	1.41836	0.156085	0.397718
ENSMUSG00000005469	PRKACA	2898.25	-0.217611	0.153843	-1.4145	0.157214	0.399374
ENSMUSG00000005470	ASF1B	1613.51	-0.632243	0.333139	-1.89783	0.057718	0.212778
ENSMUSG00000005474	MYL10	5905.84	-1.75626	0.405103	-4.33533	1.4554e-05	0.000433117
ENSMUSG00000005481	DDX39	3339.83	-0.756488	0.162457	-4.65656	3.21542e-06	0.000120632
ENSMUSG00000005483	DNAJB1	4444.05	-0.0266342	0.15219	-0.175006	0.861075	0.945904
ENSMUSG00000005493	MSH4	0.778565	0.261222	0.606948	0.430385	0.666915	NA
ENSMUSG00000005501	USP40	597.389	-0.119107	0.266758	-0.446498	0.655238	0.844281
ENSMUSG00000005503	EVX1	0.109706	0	0.282173	0	1	NA
ENSMUSG00000005505	KBTBD4	1319.5	0.117784	0.115903	1.01623	0.309518	0.582308
ENSMUSG00000005506	CELF1	6511.64	-0.0658643	0.164723	-0.399849	0.689268	0.864108
ENSMUSG00000005510	NDUFS3	2344.64	-0.209385	0.149953	-1.39634	0.162612	0.407874
ENSMUSG00000005514	POR	3738.8	0.144693	0.221733	0.652553	0.514044	0.753465
ENSMUSG00000005533	IGF1R	1703.71	0.524204	0.374904	1.39823	0.162043	0.407242
ENSMUSG00000005534	INSR	1021.36	-0.427001	0.277053	-1.54122	0.123263	0.344948
ENSMUSG00000005540	FCER2A	0	NA	NA	NA	NA	NA
ENSMUSG00000005547	CYP2A5	0.282338	-0.0405905	0.282173	-0.14385	0.885619	NA
ENSMUSG00000005553	ATP4A	2.37173	0.502664	0.667716	0.752811	0.451563	NA
ENSMUSG00000005566	TRIM28	21519.8	-0.0497338	0.171758	-0.289557	0.772155	0.907801
ENSMUSG00000005575	UBE2M	4801.58	-0.0646327	0.158546	-0.407659	0.683524	0.861224
ENSMUSG00000005580	ADCY9	62.6723	1.23362	0.479171	2.57449	0.0100387	0.0653397
ENSMUSG00000005583	MEF2C	520.259	1.48232	0.633954	2.33821	NA	NA
ENSMUSG00000005609	CTR9	3669.75	0.263637	0.0853545	3.08873	0.00201011	0.0203881
ENSMUSG00000005610	EIF4G2	42932.5	-0.157253	0.126483	-1.24327	0.213767	0.475994
ENSMUSG00000005611	MRVI1	49.9902	1.53157	0.484565	3.1607	0.0015739	0.0170183
ENSMUSG00000005615	PCYT1A	1357.29	-0.692815	0.269228	-2.57334	0.0100722	0.0655064
ENSMUSG00000005621	ZFP592	4122.03	0.119925	0.153689	0.78031	0.435208	0.694406
ENSMUSG00000005625	PSMD4	4303.32	-0.120171	0.14708	-0.817047	0.413902	0.676857
ENSMUSG00000005628	TMOD4	23.2587	0.171974	0.585429	0.293757	0.768944	0.906111
ENSMUSG00000005640	INSRR	0.566263	0.103217	0.434061	0.237795	0.81204	NA
ENSMUSG00000005649	CABP5	0.0289605	0	0.282173	0	1	NA
ENSMUSG00000005656	SNX6	2360.47	-0.16535	0.180559	-0.915765	0.35979	0.629369
ENSMUSG00000005667	MTHFD2	1999.15	0.362165	0.183544	1.97318	0.048475	0.190063
ENSMUSG00000005672	KIT	2134.61	0.50843	0.409004	1.24309	0.213834	0.475994
ENSMUSG00000005674	TOMM40L	1213.75	0.0151524	0.167221	0.0906132	0.9278	0.974271
ENSMUSG00000005677	NR1I3	7.6686	-0.292277	0.568815	-0.513834	0.607368	0.817084
ENSMUSG00000005681	APOA2	13.0172	0.941385	0.428599	2.19643	0.0280614	0.131364
ENSMUSG00000005682	PAN2	1687.84	0.0151906	0.118348	0.128355	0.897868	0.962804
ENSMUSG00000005683	CS	9097.64	-0.24619	0.0890504	-2.76461	0.005699	0.0435047
ENSMUSG00000005686	AMPD3	139.516	-0.445625	0.339903	-1.31104	0.189845	0.445462
ENSMUSG00000005687	BCAS2	1891.49	-0.124296	0.129629	-0.958861	0.337629	0.610166
ENSMUSG00000005696	SH2D1A	2856.87	-0.102777	0.24264	-0.42358	0.671872	0.854101
ENSMUSG00000005698	CTCF	7605.25	-0.106507	0.136354	-0.781104	0.434741	0.694147
ENSMUSG00000005699	PARD6A	330.817	0.317713	0.210004	1.51289	0.130307	0.356653
ENSMUSG00000005705	AGRP	11.4111	-0.333515	0.503712	-0.662115	0.507898	0.748861
ENSMUSG00000005716	PVALB	0	NA	NA	NA	NA	NA
ENSMUSG00000005718	TFAP4	1522.67	-0.252968	0.253353	-0.998478	0.318048	0.59068
ENSMUSG00000005732	RANBP1	5634.3	-0.932159	0.240797	-3.87114	0.000108326	0.00217893
ENSMUSG00000005763	CD247	12591.6	-0.861089	0.20952	-4.10982	3.95966e-05	0.000975023
ENSMUSG00000005774	RFX5	1513.73	0.157062	0.111969	1.40273	0.160697	0.404834
ENSMUSG00000005779	PSMB4	5337.32	-0.202764	0.182015	-1.11399	0.265282	0.537095
ENSMUSG00000005800	MMP8	0.264076	0	0.282173	0	1	NA
ENSMUSG00000005802	SLC30A4	1821.05	0.492697	0.277098	1.77806	0.0753944	0.254593
ENSMUSG00000005803	SQRDL	164.142	-0.757507	0.367885	-2.05909	0.0394858	0.166133
ENSMUSG00000005804	BLOC1S6	1284.11	0.126991	0.106843	1.18858	0.234606	0.502216
ENSMUSG00000005813	METAP1	1650.36	-0.010499	0.113931	-0.092152	0.926577	0.97409
ENSMUSG00000005823	GPR108	1350.27	0.44855	0.156929	2.85829	0.00425926	0.0352895
ENSMUSG00000005824	TNFSF14	388.2	1.34355	0.328434	4.09076	4.29955e-05	0.0010403
ENSMUSG00000005836	GATA6	0.293859	0	0.282173	0	1	NA
ENSMUSG00000005846	RSL1D1	5163.63	-0.323899	0.217766	-1.48737	0.136917	0.367259
ENSMUSG00000005864	CNGA2	0	NA	NA	NA	NA	NA
ENSMUSG00000005871	APC	2774.35	0.215244	0.23356	0.921577	0.356749	0.627381
ENSMUSG00000005873	REEP5	2653.47	0.0322954	0.209477	0.154172	0.877474	0.954112
ENSMUSG00000005881	ERGIC3	3406.73	0.014873	0.200515	0.0741739	0.940872	0.978805
ENSMUSG00000005882	UQCC1	1100.39	-0.254822	0.103001	-2.47399	0.0133614	0.0795255
ENSMUSG00000005883	SPO11	173.789	-0.792177	0.367124	-2.15779	0.0309441	0.140727
ENSMUSG00000005886	NCOA2	5587.16	-0.115358	0.180002	-0.640868	0.521609	0.759088
ENSMUSG00000005891	PRL4A1	0	NA	NA	NA	NA	NA
ENSMUSG00000005892	TRH	0.0264254	0	0.282173	0	1	NA
ENSMUSG00000005893	NR2C2	4435.59	-0.0691875	0.184642	-0.374711	0.707875	0.874434
ENSMUSG00000005897	NR2C1	498.037	-0.156828	0.151678	-1.03395	0.301158	0.57343
ENSMUSG00000005899	SMPD4	2413.93	-0.289512	0.171703	-1.68611	0.0917737	0.288097
ENSMUSG00000005907	PEX1	724.979	0.377852	0.107077	3.52879	0.000417467	0.00619521
ENSMUSG00000005917	OTX1	0.695438	0.451126	0.314481	1.43451	0.151428	NA
ENSMUSG00000005936	KCTD20	4040.8	-0.19883	0.0881283	-2.25614	0.024062	0.11849
ENSMUSG00000005947	ITGAE	1337.17	0.42126	0.436077	0.966023	0.334033	0.606094
ENSMUSG00000005949	CTNS	568.658	0.495001	0.174108	2.84307	0.00446817	0.0364862
ENSMUSG00000005950	P2RX5	1.17174	-0.0163637	0.600661	-0.0272427	0.978266	NA
ENSMUSG00000005951	SHPK	230.841	0.995084	0.200241	4.96944	6.71449e-07	3.31652e-05
ENSMUSG00000005952	TRPV1	0.0863122	0.0924272	0.282173	0.327555	0.743248	NA
ENSMUSG00000005958	EPHB3	3.75818	2.54795	0.657692	3.87408	0.00010703	0.00215545
ENSMUSG00000005968	TUFT1	113.449	0.301883	0.293902	1.02716	0.304347	0.576871
ENSMUSG00000005973	RCN1	1159.59	0.481686	0.166634	2.89068	0.00384414	0.0328948
ENSMUSG00000005980	DNASE1	3.84495	-1.18456	0.663609	-1.78503	0.0742562	0.251564
ENSMUSG00000005981	TRAP1	5732.11	-0.0467494	0.138818	-0.336768	0.736292	0.890624
ENSMUSG00000005982	NAA60	3072.95	0.0424272	0.155429	0.272969	0.784877	0.914471
ENSMUSG00000005983	1700037C18RIK	98.3599	0.0856125	0.233548	0.366574	0.713937	0.878198
ENSMUSG00000005986	ANKRD13D	308.661	-0.0906692	0.191376	-0.473774	0.635661	0.834002
ENSMUSG00000005994	TYRP1	0	NA	NA	NA	NA	NA
ENSMUSG00000006005	TPR	7919.87	0.0690777	0.199093	0.346962	0.72862	0.886805
ENSMUSG00000006007	PDC	0	NA	NA	NA	NA	NA
ENSMUSG00000006010	BC003331	617.578	0.606001	0.209906	2.88701	0.0038892	0.0331785
ENSMUSG00000006014	PRG4	21.736	-0.430407	0.670167	-0.642239	0.520718	0.758254
ENSMUSG00000006019	DHX34	2211.78	0.573317	0.178974	3.20336	0.00135835	0.0153851
ENSMUSG00000006021	KPTN	655.716	0.203007	0.18885	1.07496	0.282391	0.554827
ENSMUSG00000006024	NAPA	3613.18	0.20096	0.133656	1.50356	0.132695	0.360747
ENSMUSG00000006050	SRA1	1908.63	-0.0694989	0.135994	-0.511044	0.60932	0.81828
ENSMUSG00000006056	CALCOCO2	0.0423077	0	0.282173	0	1	NA
ENSMUSG00000006057	ATP5G1	2951.97	-0.504367	0.203562	-2.47771	0.013223	0.0790398
ENSMUSG00000006058	SNF8	1487.87	-0.142033	0.111069	-1.27878	0.200974	0.459184
ENSMUSG00000006095	TBCB	1471.19	0.024279	0.175493	0.138347	0.889966	0.958898
ENSMUSG00000006127	INPP5K	2448.57	0.0113829	0.178363	0.0638184	0.949115	0.981752
ENSMUSG00000006134	CRKL	3606.26	0.00369093	0.111327	0.0331541	0.973552	0.991175
ENSMUSG00000006143	UPK3BL	0.780734	0	0.307925	0	1	NA
ENSMUSG00000006154	EPS8L1	849.806	1.19593	0.462356	2.58659	0.009693	0.0637356
ENSMUSG00000006169	CLINT1	6549.25	-0.0653779	0.126913	-0.515138	0.606457	0.816856
ENSMUSG00000006179	PRSS16	59.14	0.0865632	0.412477	0.209862	0.833776	0.934343
ENSMUSG00000006191	CDKAL1	747.045	-0.0603215	0.104189	-0.578964	0.562614	0.787592
ENSMUSG00000006200	RHOX6	0	NA	NA	NA	NA	NA
ENSMUSG00000006204	5430419D17RIK	0	NA	NA	NA	NA	NA
ENSMUSG00000006205	HTRA1	1.43158	0.499156	0.660224	0.756041	0.449624	NA
ENSMUSG00000006215	ZBTB17	2027.58	-0.106109	0.187644	-0.565482	0.571746	0.794372
ENSMUSG00000006216	CLCNKB	0.0296105	0	0.282173	0	1	NA
ENSMUSG00000006218	FAM131C	0.101453	0	0.282173	0	1	NA
ENSMUSG00000006219	FBLIM1	7.23686	0.950925	0.613777	1.5493	0.121309	0.34181
ENSMUSG00000006221	HSPB7	1.38149	-0.279256	0.53321	-0.523725	0.600469	NA
ENSMUSG00000006235	EPOR	8.91231	0.0991326	0.605712	0.163663	0.869996	0.950284
ENSMUSG00000006241	CCDC159	0.783693	-0.837889	0.590217	-1.41963	0.155716	NA
ENSMUSG00000006262	MOB1B	684.856	-0.1247	0.300137	-0.415478	0.677792	0.858033
ENSMUSG00000006269	ATP6V1B1	0	NA	NA	NA	NA	NA
ENSMUSG00000006270	VAX1	0.0264254	0	0.282173	0	1	NA
ENSMUSG00000006273	ATP6V1B2	3142.01	0.284017	0.131918	2.15298	0.03132	0.14171
ENSMUSG00000006276	EPS15L1	3444.43	-0.208919	0.126152	-1.65609	0.0977029	0.299129
ENSMUSG00000006281	TEP1	1245.56	0.204786	0.189057	1.0832	0.278722	0.551128
ENSMUSG00000006288	TTC5	1680.31	-0.0334712	0.166033	-0.201594	0.840234	0.936492
ENSMUSG00000006289	OSGEP	2043.58	-0.0555095	0.143799	-0.386022	0.69948	0.870009
ENSMUSG00000006299	AAMP	6062.97	0.190307	0.167837	1.13388	0.256845	0.528828
ENSMUSG00000006301	TMBIM1	252.061	0.107797	0.196593	0.548328	0.583467	0.801529
ENSMUSG00000006304	ARPC2	12410	-0.0160915	0.13255	-0.1214	0.903374	0.965089
ENSMUSG00000006307	KMT2B	4793.61	0.0915452	0.219384	0.417282	0.676472	0.857402
ENSMUSG00000006310	ZBTB32	1.10316	-0.286744	0.612239	-0.468353	0.639532	NA
ENSMUSG00000006311	ETV2	0.378938	0	0.310923	0	1	NA
ENSMUSG00000006313	UPK1A	9.29636	-1.12745	0.585552	-1.92545	0.0541727	0.204018
ENSMUSG00000006315	TMEM147	1405.86	0.186901	0.189564	0.985955	0.324155	0.596609
ENSMUSG00000006333	RPS9	54379.5	-0.115352	0.182448	-0.632244	0.527227	0.763205
ENSMUSG00000006335	TFPT	651.152	0.0486583	0.125131	0.388858	0.697381	0.869254
ENSMUSG00000006342	SUSD2	87.4178	0.503489	0.350014	1.43848	0.150298	0.389388
ENSMUSG00000006344	GGT5	124.419	0.398407	0.396076	1.00589	0.314471	0.58693
ENSMUSG00000006345	GGT1	168.833	-0.112868	0.629257	-0.179368	0.857649	0.944115
ENSMUSG00000006356	CRIP2	239.459	-0.0771116	0.366611	-0.210336	0.833405	0.93425
ENSMUSG00000006360	CRIP1	19710	-0.926026	0.235674	-3.92927	8.52057e-05	0.00179157
ENSMUSG00000006362	CBFA2T3	2890.63	0.287479	0.284921	1.00898	0.312986	0.585927
ENSMUSG00000006369	FBLN1	23.0955	-1.92991	0.593239	-3.25318	0.00114122	0.0135221
ENSMUSG00000006373	PGRMC1	2414.41	0.313627	0.164389	1.90784	0.0564125	0.209663
ENSMUSG00000006378	GCAT	99.3951	-0.238263	0.392024	-0.607777	0.543336	0.775033
ENSMUSG00000006386	TEK	0.396654	0	0.363364	0	1	NA
ENSMUSG00000006389	MPL	2.93531	0.54894	0.644348	0.851931	0.394252	0.660516
ENSMUSG00000006390	ELOVL1	1795.88	0.275979	0.189839	1.45375	0.146016	0.382809
ENSMUSG00000006392	MED8	1108.59	-0.439497	0.102611	-4.28314	1.84275e-05	0.00052321
ENSMUSG00000006395	HYI	239.282	0.40011	0.194602	2.05605	0.0397781	0.167117
ENSMUSG00000006398	CDC20	2274.18	-0.32731	0.309787	-1.05656	0.290711	0.563433
ENSMUSG00000006403	ADAMTS4	1.19173	0.0746984	0.613371	0.121783	0.903071	NA
ENSMUSG00000006411	NECTIN4	9.47116	1.90917	0.536069	3.56142	0.000368851	0.00565254
ENSMUSG00000006412	PFDN2	1291.9	-0.12578	0.121023	-1.03931	0.298663	0.571088
ENSMUSG00000006418	RNF114	6086.4	-0.157366	0.217983	-0.721917	0.470345	0.721464
ENSMUSG00000006423	C330007P06RIK	1694.34	-0.108668	0.21792	-0.498662	0.618018	0.822861
ENSMUSG00000006435	NEURL1A	6.82529	0.148475	0.660723	0.224716	0.8222	0.930938
ENSMUSG00000006442	SRM	2835.83	-0.837207	0.305183	-2.74329	0.00608265	0.0457432
ENSMUSG00000006445	EPHA2	71.0675	-1.02193	0.457399	-2.23422	0.0254687	0.12295
ENSMUSG00000006456	RBM14	3475.47	-0.360551	0.186047	-1.93796	0.0526281	0.200371
ENSMUSG00000006457	ACTN3	19.1388	-0.129229	0.403161	-0.320538	0.74856	0.895408
ENSMUSG00000006462	A530013C23RIK	0.1098	0	0.282173	0	1	NA
ENSMUSG00000006463	ZDHHC24	313.631	0.342261	0.204143	1.67657	0.0936261	0.291533
ENSMUSG00000006464	BBS1	141.379	-0.563659	0.331424	-1.70072	0.0889961	0.282469
ENSMUSG00000006469	SLC34A3	0	NA	NA	NA	NA	NA
ENSMUSG00000006471	NDOR1	1874.79	0.0365171	0.158756	0.230021	0.818075	0.928847
ENSMUSG00000006476	NSMF	452.53	0.0220223	0.251442	0.0875841	0.930207	0.975307
ENSMUSG00000006488	PRL7A1	0	NA	NA	NA	NA	NA
ENSMUSG00000006490	PRL8A9	0	NA	NA	NA	NA	NA
ENSMUSG00000006494	PDK1	3894.21	0.273057	0.139993	1.95051	0.0511153	0.196765
ENSMUSG00000006498	PTBP1	22475.4	-0.533184	0.161996	-3.29134	0.00099711	0.0122854
ENSMUSG00000006517	MVD	801.853	-0.229295	0.245935	-0.932339	0.351161	0.623348
ENSMUSG00000006519	CYBA	3705.85	-0.0499099	0.197335	-0.252919	0.80033	0.921433
ENSMUSG00000006522	ITIH3	0	NA	NA	NA	NA	NA
ENSMUSG00000006526	TMEM110	502.971	-0.200802	0.145663	-1.37853	0.168039	0.4158
ENSMUSG00000006527	SFMBT1	1269.09	-0.21585	0.177984	-1.21275	0.225226	0.490817
ENSMUSG00000006529	ITIH1	0	NA	NA	NA	NA	NA
ENSMUSG00000006538	IHH	3.05778	0.219051	0.666971	0.328426	0.742589	0.892895
ENSMUSG00000006542	PRKAG3	0.419888	-0.143459	0.369103	-0.388669	0.697521	NA
ENSMUSG00000006546	CRYBA2	0	NA	NA	NA	NA	NA
ENSMUSG00000006567	ATP7B	24.5232	0.220597	0.513045	0.429976	0.667213	0.851404
ENSMUSG00000006570	DEFB2	0	NA	NA	NA	NA	NA
ENSMUSG00000006574	SLC4A1	0.572302	-0.423083	0.468376	-0.903298	0.366368	NA
ENSMUSG00000006575	RUNDC3A	125.59	1.1175	0.438777	2.54685	0.01087	0.0690729
ENSMUSG00000006576	SLC4A3	0.254844	0.0039743	0.290116	0.013699	0.98907	NA
ENSMUSG00000006585	CDT1	2873.1	-0.791209	0.253938	-3.11575	0.00183475	0.0190967
ENSMUSG00000006586	RUNX1T1	0	NA	NA	NA	NA	NA
ENSMUSG00000006587	SNAI3	750.055	-0.802853	0.331649	-2.42079	0.015487	0.0884855
ENSMUSG00000006589	APRT	1619.39	-0.89126	0.234703	-3.79739	0.00014623	0.00275854
ENSMUSG00000006599	GTF2H1	1832.13	-0.0803735	0.147158	-0.54617	0.584949	0.80264
ENSMUSG00000006611	HFE	49.7056	-1.60105	0.404256	-3.9605	7.47942e-05	0.00160914
ENSMUSG00000006638	ABHD1	119.147	-0.0794489	0.377111	-0.210678	0.833139	0.93425
ENSMUSG00000006641	SLC5A6	725.891	0.128119	0.266963	0.479911	0.631291	0.8318
ENSMUSG00000006642	TCF23	0.0269766	0	0.282173	0	1	NA
ENSMUSG00000006649	NPHS1	173.951	-0.441981	0.393354	-1.12362	0.261174	0.533491
ENSMUSG00000006651	APLP1	21.3879	0.362423	0.611163	0.593006	0.553177	0.782122
ENSMUSG00000006673	QRICH1	5334.23	-0.10351	0.0912469	-1.13439	0.256631	0.528488
ENSMUSG00000006675	P4HTM	118.114	-0.170446	0.241505	-0.705765	0.480335	0.728421
ENSMUSG00000006676	USP19	6913.77	-0.0151552	0.13453	-0.112653	0.910305	0.967276
ENSMUSG00000006678	POLA1	1895.77	-0.644813	0.379103	-1.70089	0.0889636	0.28242
ENSMUSG00000006699	CDC42	13376.7	-0.0275971	0.116466	-0.236955	0.812692	0.926269
ENSMUSG00000006705	PKNOX1	2161.37	0.025228	0.122428	0.206064	0.836741	0.935158
ENSMUSG00000006711	D130043K22RIK	1.05615	1.46409	0.619199	2.36449	0.0180548	NA
ENSMUSG00000006715	GMNN	1095.85	-0.618344	0.312851	-1.97648	0.0481005	0.188892
ENSMUSG00000006717	ACOT13	760.204	-0.0671025	0.140429	-0.477838	0.632766	0.832836
ENSMUSG00000006720	ZFP184	225.024	-0.62779	0.310507	-2.02182	0.043195	0.175759
ENSMUSG00000006724	CYP27B1	6.9427	0.0272455	0.63639	0.0428126	0.965851	0.988529
ENSMUSG00000006728	CDK4	13667.6	-0.603911	0.17348	-3.48115	0.000499269	0.00717672
ENSMUSG00000006731	B4GALNT1	9276.59	0.535087	0.342705	1.56136	0.118438	0.33714
ENSMUSG00000006732	METTL1	821.855	-0.339765	0.263743	-1.28824	0.197662	0.455593
ENSMUSG00000006736	TSPAN31	3123.11	0.413382	0.188932	2.188	0.0286698	0.133111
ENSMUSG00000006740	KIF5B	3861.38	0.0646965	0.242843	0.266413	0.789921	0.916621
ENSMUSG00000006763	SAAL1	939.892	-0.527741	0.0919679	-5.73832	9.56193e-09	8.44637e-07
ENSMUSG00000006764	TPH2	0.0309578	0	0.282173	0	1	NA
ENSMUSG00000006777	KRT23	0	NA	NA	NA	NA	NA
ENSMUSG00000006782	CNP	8746.02	-0.473689	0.168032	-2.81905	0.00481659	0.0386415
ENSMUSG00000006784	TTC25	4.94185	-0.220407	0.603169	-0.365415	0.714801	0.878958
ENSMUSG00000006800	SULF2	32.4758	1.67572	0.472545	3.54616	0.000390891	0.00590515
ENSMUSG00000006818	SOD2	2539.7	0.256064	0.134878	1.89849	0.057631	0.212616
ENSMUSG00000006850	TMCO6	652.871	-0.0320271	0.161807	-0.197934	0.843097	0.938242
ENSMUSG00000006906	STAMBP	1131.18	0.155129	0.0912775	1.69953	0.0892197	0.282976
ENSMUSG00000006920	EZH1	2205.81	0.277079	0.21319	1.29968	0.193711	0.450969
ENSMUSG00000006930	HAP1	14.6227	0.413661	0.556446	0.743399	0.45724	0.711037
ENSMUSG00000006931	P3H4	3.72011	0.711308	0.652965	1.08935	0.275999	0.548432
ENSMUSG00000006932	CTNNB1	11087.8	0.16285	0.0982811	1.65698	0.097523	0.298941
ENSMUSG00000006941	EIF1B	2431.88	-0.0152101	0.144537	-0.105233	0.916191	0.970216
ENSMUSG00000006948	KLK4	0	NA	NA	NA	NA	NA
ENSMUSG00000006958	CHRD	0.191616	0	0.282173	0	1	NA
ENSMUSG00000006998	PSMD2	8946.77	-0.233196	0.10039	-2.32291	0.0201839	0.105042
ENSMUSG00000007021	SYNGR3	1.77689	0.446026	0.666017	0.669692	0.503054	NA
ENSMUSG00000007029	VARS	12205.7	0.00705228	0.178542	0.0394993	0.968492	0.989474
ENSMUSG00000007030	VWA7	7.18715	1.3539	0.612711	2.2097	0.0271263	0.128111
ENSMUSG00000007033	HSPA1L	1.63914	0.594267	0.645981	0.919946	0.357601	NA
ENSMUSG00000007034	SLC44A4	0.182984	0.0924272	0.282173	0.327555	0.743248	NA
ENSMUSG00000007035	MSH5	194.16	-0.309025	0.190408	-1.62297	0.104596	0.311772
ENSMUSG00000007036	ABHD16A	1912.31	-0.08788	0.148579	-0.591471	0.554205	0.782912
ENSMUSG00000007038	NEU1	1277.42	-0.289788	0.14983	-1.93412	0.0530983	0.201518
ENSMUSG00000007039	DDAH2	822.053	-0.29827	0.337882	-0.882763	0.377364	0.645833
ENSMUSG00000007041	CLIC1	11848.6	-0.245801	0.169275	-1.45208	0.14648	0.383424
ENSMUSG00000007050	LSM2	1382.8	-0.500028	0.210495	-2.37549	0.0175255	0.0959304
ENSMUSG00000007080	POLE	3232.01	-0.532458	0.304487	-1.74871	0.080342	0.264402
ENSMUSG00000007097	ATP1A2	1.33129	0.505759	0.619681	0.81616	0.414409	NA
ENSMUSG00000007107	ATP1A4	0	NA	NA	NA	NA	NA
ENSMUSG00000007122	CASQ1	0.0745184	0.048088	0.282173	0.17042	0.86468	NA
ENSMUSG00000007207	STX1A	99.3095	1.41861	0.473271	2.99745	0.00272244	0.025766
ENSMUSG00000007209	CEACAM9	0.0423077	0	0.282173	0	1	NA
ENSMUSG00000007216	ZFP775	566.398	-0.441904	0.192814	-2.29187	0.0219133	0.110727
ENSMUSG00000007279	SCUBE2	0	NA	NA	NA	NA	NA
ENSMUSG00000007338	MRPL49	1564.1	-0.230901	0.120303	-1.91933	0.0549431	0.205944
ENSMUSG00000007379	DENND2C	39.6837	0.224557	0.395715	0.56747	0.570395	0.793099
ENSMUSG00000007411	MARK3	2231.48	-0.0156436	0.0967682	-0.161661	0.871573	0.951537
ENSMUSG00000007415	GATAD1	2353.3	0.0725839	0.107068	0.677926	0.497818	0.742161
ENSMUSG00000007440	PCDHA11	0	NA	NA	NA	NA	NA
ENSMUSG00000007457	2310003L06RIK	0	NA	NA	NA	NA	NA
ENSMUSG00000007458	M6PR	8259.78	0.287461	0.0917539	3.13296	0.00173055	0.0182743
ENSMUSG00000007476	LRRC8A	1319.51	-0.301331	0.188543	-1.5982	0.109998	0.321928
ENSMUSG00000007480	MC5R	4.09923	1.54002	0.671276	2.29417	0.0217807	0.110257
ENSMUSG00000007564	PPP2R1A	8875.54	-0.229082	0.156564	-1.46318	0.143417	0.377955
ENSMUSG00000007570	FANCE	635.024	-0.212927	0.182545	-1.16644	0.243437	0.513154
ENSMUSG00000007589	TINF2	1252.14	-0.295051	0.132705	-2.22337	0.0261911	0.125251
ENSMUSG00000007591	TSSK4	31.2455	-0.309413	0.374071	-0.827151	0.408152	0.672175
ENSMUSG00000007594	HAPLN4	0.475408	0	0.376142	0	1	NA
ENSMUSG00000007603	DUS3L	1567.3	0.506859	0.129934	3.9009	9.58354e-05	0.00196799
ENSMUSG00000007610	GTPBP3	722.287	0.0796743	0.142411	0.559467	0.575843	0.796958
ENSMUSG00000007613	TGFBR1	2149.74	-0.0549974	0.311811	-0.17638	0.859995	0.945202
ENSMUSG00000007617	HOMER1	436.227	1.07445	0.265985	4.03952	5.35596e-05	0.00123321
ENSMUSG00000007646	RAD51C	221.388	-0.946254	0.270067	-3.50377	0.00045872	0.00669434
ENSMUSG00000007653	GABRB2	0	NA	NA	NA	NA	NA
ENSMUSG00000007655	CAV1	0.78771	1.26065	0.57683	2.18547	0.0288541	NA
ENSMUSG00000007656	ARPP19	2169.25	-0.474663	0.166768	-2.84625	0.00442373	0.036203
ENSMUSG00000007659	BCL2L1	1327.41	0.592734	0.213523	2.77597	0.00550379	0.0424611
ENSMUSG00000007670	KHSRP	6699.61	0.0442226	0.175859	0.251466	0.801454	0.921698
ENSMUSG00000007682	DIO2	404.583	-0.319884	0.337114	-0.948888	0.342677	0.615003
ENSMUSG00000007721	CCDC124	1722.24	-0.310164	0.219975	-1.41	0.158541	0.40128
ENSMUSG00000007739	CCT4	9904.31	-0.163889	0.142194	-1.15257	0.249086	0.519811
ENSMUSG00000007777	0610009B22RIK	414.763	0.270972	0.177157	1.52956	0.126126	0.34972
ENSMUSG00000007783	CPT1C	3.66608	-0.194616	0.636765	-0.305632	0.759885	0.901078
ENSMUSG00000007805	TWIST2	0	NA	NA	NA	NA	NA
ENSMUSG00000007812	ZFP655	1599.22	0.128445	0.203139	0.632301	0.52719	0.763205
ENSMUSG00000007815	RHOA	18052.3	-0.0486529	0.101852	-0.477682	0.632876	0.832836
ENSMUSG00000007817	ZMIZ1	10517.7	0.167252	0.166365	1.00533	0.314738	0.587109
ENSMUSG00000007827	ANKRD26	592.337	-0.599877	0.241393	-2.48507	0.0129527	0.0780954
ENSMUSG00000007833	ALDH16A1	1920.99	0.435648	0.16417	2.65364	0.0079629	0.055647
ENSMUSG00000007836	HNRNPA0	11985.9	0.15393	0.107524	1.43158	0.152264	0.392049
ENSMUSG00000007837	PRRG2	111.28	0.60527	0.271989	2.22535	0.0260578	0.124792
ENSMUSG00000007850	HNRNPH1	6896.38	-0.353212	0.260689	-1.35491	0.175445	0.425982
ENSMUSG00000007867	IFT43	10.3167	-0.811853	0.564017	-1.43941	0.150034	0.388964
ENSMUSG00000007872	ID3	4478.64	-0.0972361	0.322823	-0.301206	0.763258	0.902833
ENSMUSG00000007877	TCAP	2.33041	0.100031	0.672628	0.148716	0.881778	NA
ENSMUSG00000007880	ARID1A	18440.8	-0.0097679	0.205353	-0.0475665	0.962062	0.987375
ENSMUSG00000007888	CRLF1	4.14335	-0.435646	0.653076	-0.667068	0.504729	0.746856
ENSMUSG00000007891	CTSD	13666.7	0.229702	0.197182	1.16492	0.24405	0.513993
ENSMUSG00000007892	RPLP1	37921.2	-0.287826	0.212189	-1.35646	0.174953	0.424974
ENSMUSG00000007907	CABS1	0	NA	NA	NA	NA	NA
ENSMUSG00000007908	HMGCLL1	0.668897	0	0.496202	0	1	NA
ENSMUSG00000007944	TTC9B	1.3286	0.439642	0.649098	0.677312	0.498208	NA
ENSMUSG00000007946	PHOX2A	0	NA	NA	NA	NA	NA
ENSMUSG00000007950	ABHD8	5851.15	-0.109094	0.236378	-0.461521	0.644425	0.838934
ENSMUSG00000007987	IFT22	331.353	-0.434356	0.225339	-1.92756	0.0539097	0.203266
ENSMUSG00000007989	FZD3	15.73	-0.168083	0.468923	-0.358445	0.72001	0.881338
ENSMUSG00000008028	1700008O03RIK	10.3677	1.00956	0.562782	1.79388	0.0728324	0.248709
ENSMUSG00000008035	MID1IP1	920.357	0.0377727	0.150917	0.250289	0.802364	0.922045
ENSMUSG00000008036	AP2S1	2931.56	-0.325508	0.174737	-1.86284	0.0624845	0.224223
ENSMUSG00000008090	FGFRL1	272.621	0.171166	0.207418	0.825222	0.409245	0.672873
ENSMUSG00000008129	4930432K21RIK	137.626	-0.178166	0.215621	-0.826294	0.408637	0.672403
ENSMUSG00000008136	FHL2	480.598	-0.860148	0.31317	-2.74658	0.00602197	0.0454301
ENSMUSG00000008140	EMC10	4720.53	0.0225879	0.187454	0.120498	0.904088	0.965089
ENSMUSG00000008153	CLSTN3	70.4377	-0.366187	0.521949	-0.701577	0.482943	0.730783
ENSMUSG00000008167	FBXW9	297.53	0.404951	0.210458	1.92414	0.0543366	0.204451
ENSMUSG00000008193	SPIB	553.997	-1.35243	0.606484	-2.22996	0.0257504	0.12382
ENSMUSG00000008200	FNBP4	3479.54	-0.0444027	0.18911	-0.234798	0.814365	0.926841
ENSMUSG00000008206	CERS4	350.44	1.72367	0.45246	3.80956	0.000139214	0.00264111
ENSMUSG00000008226	SCRN3	201.396	0.449539	0.188497	2.38487	0.0170853	0.0942316
ENSMUSG00000008301	PHAX	1603.24	0.0334696	0.112453	0.297631	0.765985	0.904777
ENSMUSG00000008305	TLE1	562.131	0.842811	0.281638	2.99253	0.00276674	0.0260377
ENSMUSG00000008307	1700109H08RIK	61.4632	0.26017	0.450087	0.578043	0.563235	0.787934
ENSMUSG00000008318	RELT	922.176	0.150372	0.23624	0.636523	0.524436	0.761189
ENSMUSG00000008333	SNRPB2	2335.25	-0.216405	0.198915	-1.08793	0.276628	0.549141
ENSMUSG00000008348	UBC	20490.4	-0.119966	0.159045	-0.754291	0.450675	0.706149
ENSMUSG00000008373	PRPF31	3175.67	-0.323757	0.154293	-2.09833	0.0358763	0.155734
ENSMUSG00000008384	SERTAD1	627.047	0.503854	0.257423	1.9573	0.0503117	0.194739
ENSMUSG00000008393	CARHSP1	1326.55	-0.207675	0.327317	-0.634475	0.525771	0.761957
ENSMUSG00000008398	ELK3	2660.31	0.41149	0.297078	1.38512	0.166014	0.41303
ENSMUSG00000008429	HERPUD2	1246.6	0.272934	0.131769	2.07131	0.0383301	0.162785
ENSMUSG00000008435	RDH13	650.198	0.454517	0.131574	3.45445	0.000551427	0.0077427
ENSMUSG00000008438	ADAM21	2.56918	0.700887	0.67177	1.04334	0.296789	NA
ENSMUSG00000008450	NUTF2	939.306	-0.691052	0.189358	-3.64946	0.000262797	0.00436557
ENSMUSG00000008461	FUT1	0.155332	0	0.282173	0	1	NA
ENSMUSG00000008475	ARPC5	8644.94	-0.220118	0.126337	-1.7423	0.0814553	0.266333
ENSMUSG00000008482	RNF151	1.44849	0.150284	0.656943	0.228763	0.819053	NA
ENSMUSG00000008489	ELAVL2	0.234957	0.136766	0.282173	0.48469	0.627896	NA
ENSMUSG00000008496	POU2F2	155.755	1.28115	0.424117	3.02075	0.00252147	0.0241931
ENSMUSG00000008540	MGST1	30.357	0.992371	0.499741	1.98577	0.0470588	0.186216
ENSMUSG00000008575	NFIB	3.21019	-0.0304853	0.669385	-0.0455422	0.963675	0.987748
ENSMUSG00000008590	HTR3B	0	NA	NA	NA	NA	NA
ENSMUSG00000008601	RAB25	2.44133	0.993742	0.671737	1.47936	0.139044	NA
ENSMUSG00000008604	UBQLN4	3570.46	0.232961	0.153099	1.52163	0.128101	0.353261
ENSMUSG00000008658	RBFOX1	0.142207	0	0.282173	0	1	NA
ENSMUSG00000008668	RPS18	34760	-0.273235	0.180457	-1.51413	0.129994	0.356186
ENSMUSG00000008682	RPL10	8545.79	0.0831541	0.228374	0.364113	0.715773	0.879455
ENSMUSG00000008683	RPS15A	27383	-0.117033	0.175451	-0.667041	0.504746	0.746856
ENSMUSG00000008690	NCAPH2	5978.27	-0.348171	0.179959	-1.93473	0.0530236	0.20128
ENSMUSG00000008730	HIPK1	9388.73	-0.139762	0.194574	-0.718297	0.472574	0.722702
ENSMUSG00000008734	GPRC5B	321.842	-0.951556	0.491414	-1.93636	0.0528232	0.200793
ENSMUSG00000008763	MAN1A2	2711.35	0.416307	0.151283	2.75184	0.00592617	0.0448086
ENSMUSG00000008789	CEACAM5	0	NA	NA	NA	NA	NA
ENSMUSG00000008813	TPPP2	0.123696	0.048088	0.282173	0.17042	0.86468	NA
ENSMUSG00000008822	ACYP1	557.44	-0.509512	0.160245	-3.17958	0.00147487	0.0162506
ENSMUSG00000008843	CLDN13	0	NA	NA	NA	NA	NA
ENSMUSG00000008845	CD163	116.444	1.19148	0.267574	4.4529	8.47175e-06	0.000273042
ENSMUSG00000008855	HDAC5	1241.48	0.742568	0.22283	3.33245	0.000860863	0.0110047
ENSMUSG00000008859	RALA	1325.09	-0.0463128	0.159875	-0.289681	0.77206	0.907778
ENSMUSG00000008874	CLEC3A	0	NA	NA	NA	NA	NA
ENSMUSG00000008892	VDAC3	3896.45	-0.151906	0.149687	-1.01483	0.310189	0.583101
ENSMUSG00000008932	SLC1A7	0	NA	NA	NA	NA	NA
ENSMUSG00000008958	VPS72	2307.78	-0.0739244	0.195759	-0.37763	0.705706	0.873049
ENSMUSG00000008976	GABPA	2344.78	-0.192193	0.193208	-0.994743	0.319861	0.592224
ENSMUSG00000008999	BMP7	288.389	0.220132	0.341377	0.644836	0.519033	0.757056
ENSMUSG00000009013	DYNLL1	5798.85	-0.232845	0.193727	-1.20192	0.229395	0.49576
ENSMUSG00000009030	PDCL	1417.97	0.317856	0.150565	2.11109	0.0347646	0.152015
ENSMUSG00000009035	TMEM184B	1685.8	0.0827036	0.189625	0.436142	0.662734	0.848557
ENSMUSG00000009047	GM5965	0	NA	NA	NA	NA	NA
ENSMUSG00000009070	RSPH14	0.070509	0	0.282173	0	1	NA
ENSMUSG00000009073	NF2	2894.35	0.0500629	0.101828	0.49164	0.622974	0.82603
ENSMUSG00000009075	CABP7	5.86627	-0.368686	0.638642	-0.577297	0.563739	0.78823
ENSMUSG00000009076	ZMAT5	865.273	0.200387	0.206218	0.971725	0.331188	0.603029
ENSMUSG00000009079	EWSR1	15076.6	-0.377852	0.127514	-2.96323	0.00304432	0.0278645
ENSMUSG00000009090	AP1B1	6876.53	0.159449	0.19703	0.809262	0.418364	0.680494
ENSMUSG00000009092	DERL3	27.8073	-0.446519	0.531822	-0.839603	0.401131	0.666224
ENSMUSG00000009093	GSTT4	0.973355	-0.0290119	0.624129	-0.0464837	0.962925	NA
ENSMUSG00000009097	TBX1	0.324223	0.152766	0.356999	0.427916	0.668712	NA
ENSMUSG00000009108	GNAT2	9.49749	-1.44018	0.601242	-2.39534	0.0166048	0.0926616
ENSMUSG00000009112	BCL2L13	3180.72	0.195108	0.0719813	2.71053	0.00671755	0.0493182
ENSMUSG00000009114	2610028H24RIK	0.14594	0.00374873	0.282173	0.0132852	0.9894	NA
ENSMUSG00000009115	SPATC1L	0.799734	0.430044	0.480383	0.89521	0.370675	NA
ENSMUSG00000009145	DQX1	68.531	-0.517699	0.356674	-1.45146	0.146651	0.383692
ENSMUSG00000009185	CCL8	6.59445	1.83046	0.591596	3.09411	0.00197408	0.0201327
ENSMUSG00000009207	LNPK	279.688	-0.686996	0.287279	-2.39139	0.0167847	0.0931275
ENSMUSG00000009210	PRR29	3.73825	0	0.664322	0	1	1
ENSMUSG00000009214	TMEM8C	0.939298	0	0.431295	0	1	NA
ENSMUSG00000009216	FAM163B	923.256	-3.96508	0.588992	-6.73197	1.67381e-11	3.17548e-09
ENSMUSG00000009246	TRPM5	1.59515	0.609933	0.659573	0.924739	0.355102	NA
ENSMUSG00000009248	ASCL2	0.0992939	0.048088	0.282173	0.17042	0.86468	NA
ENSMUSG00000009281	RARRES2	3.85577	0.85905	0.662341	1.29699	0.194635	0.45156
ENSMUSG00000009291	PTTG1IP	2444.72	0.732915	0.15381	4.76507	1.88787e-06	7.76304e-05
ENSMUSG00000009292	TRPM2	15.4846	0.0288147	0.504621	0.0571016	0.954464	0.984114
ENSMUSG00000009293	UBE2G2	1921.5	-0.0664208	0.138411	-0.479882	0.631311	0.8318
ENSMUSG00000009350	MPO	16.6498	0.133562	0.454197	0.294063	0.76871	0.906111
ENSMUSG00000009356	LPO	0	NA	NA	NA	NA	NA
ENSMUSG00000009376	MET	6.6835	1.2205	0.655297	1.86252	0.0625296	0.224223
ENSMUSG00000009378	SLC16A12	0.452118	0.1477	0.456632	0.323457	0.74635	NA
ENSMUSG00000009394	SYN2	0.3312	0.0477764	0.282197	0.169301	0.86556	NA
ENSMUSG00000009406	ELK1	1041.71	0.00282892	0.204013	0.0138663	0.988937	0.996277
ENSMUSG00000009418	NAV1	99.8846	1.55444	0.476046	3.26532	0.0010934	0.0131377
ENSMUSG00000009470	TNPO1	6780.74	-0.155486	0.211629	-0.734708	0.462517	0.715306
ENSMUSG00000009471	MYOD1	0.0788999	0.048088	0.282173	0.17042	0.86468	NA
ENSMUSG00000009487	OTOG	0.0868815	0	0.282173	0	1	NA
ENSMUSG00000009535	RNMT	1666.67	0.0544716	0.195071	0.27924	0.780061	0.912238
ENSMUSG00000009545	KCNQ1	0.0400477	0	0.282173	0	1	NA
ENSMUSG00000009549	SRP14	3219.92	-0.078339	0.132661	-0.590521	0.554841	0.78321
ENSMUSG00000009551	6330409D20RIK	0.0765375	0.048088	0.282173	0.17042	0.86468	NA
ENSMUSG00000009555	CDK9	3927.65	-0.0796378	0.108827	-0.731784	0.4643	0.717001
ENSMUSG00000009563	TOR2A	2037.59	0.0654655	0.190446	0.343749	0.731035	0.8883
ENSMUSG00000009566	FPGS	1333.9	0.15506	0.199355	0.777805	0.436684	0.695586
ENSMUSG00000009569	MKL2	1256.03	-0.386138	0.170315	-2.2672	0.0233781	0.115953
ENSMUSG00000009575	CBX5	8351.4	-0.247071	0.30904	-0.799479	0.424012	0.684811
ENSMUSG00000009580	ODAM	0	NA	NA	NA	NA	NA
ENSMUSG00000009585	APOBEC3	10908.1	0.159475	0.151174	1.05491	0.291469	0.564247
ENSMUSG00000009588	ST6GALNAC1	5.11024	1.09502	0.658988	1.66167	0.0965782	0.297047
ENSMUSG00000009596	TAF7L	0	NA	NA	NA	NA	NA
ENSMUSG00000009614	SARDH	17.1458	0.0219693	0.509678	0.0431043	0.965618	0.988446
ENSMUSG00000009621	VAV2	1147.21	-0.503755	0.141065	-3.57108	0.000355517	0.00551616
ENSMUSG00000009628	TEX15	34.1411	-0.167031	0.632185	-0.264213	0.791616	0.917334
ENSMUSG00000009630	PPP2CB	3212.98	-0.114402	0.105391	-1.08549	0.277703	0.55044
ENSMUSG00000009633	G0S2	59.433	-1.1029	0.436237	-2.52821	0.0114646	0.0716589
ENSMUSG00000009640	DMAP1	1172.14	-0.0881505	0.144628	-0.609498	0.542194	0.773901
ENSMUSG00000009646	PLA2G12B	0.172567	0.048088	0.282173	0.17042	0.86468	NA
ENSMUSG00000009647	MCU	659.312	-0.0363333	0.192107	-0.189131	0.84999	0.941197
ENSMUSG00000009654	OIT3	0.673619	0.32279	0.448887	0.71909	0.472085	NA
ENSMUSG00000009670	TEX11	67.3487	-1.04616	0.380546	-2.74909	NA	NA
ENSMUSG00000009681	BCR	4812.88	0.2891	0.185648	1.55725	0.119411	0.338993
ENSMUSG00000009687	FXYD5	5550.46	0.285424	0.237273	1.20293	0.229001	0.495188
ENSMUSG00000009731	KCND1	7.89226	0.868952	0.59277	1.46592	0.14267	0.37679
ENSMUSG00000009733	TFCP2	387.65	-0.0768546	0.166176	-0.462491	0.64373	0.838722
ENSMUSG00000009734	POU6F2	0	NA	NA	NA	NA	NA
ENSMUSG00000009739	POU6F1	681.322	-1.70912	0.247488	-6.90586	4.98998e-12	1.11077e-09
ENSMUSG00000009741	UBP1	2552.01	0.275766	0.145219	1.89897	0.057569	0.212569
ENSMUSG00000009772	NUAK2	165.784	0.0514485	0.231871	0.221884	0.824404	0.931608
ENSMUSG00000009828	ICK	1261.5	0.120966	0.139289	0.868452	0.385147	0.652133
[truncated: 47,520 more rows]

## Sheet: 48 hours KO vs HET unfiltered
ID	gene	baseMean	log2FoldChange	lfcSE	stat	pvalue	padj
[truncated: 48,795 more rows]
