# Supplementary material for: Critical role of WNK1 in MYC-dependent early mouse thymocyte development
Source: eLife. 2020 Oct 14;9:e56934. doi: 10.7554/eLife.56934 (PMC7591260; doi:10.7554/eLife.56934)
Supplement: Supplementary file 3. — Analysis of RNAseq experiment described in Figure 3A, showing differential gene expression analysis with DESeq2 as in Supplementary file 2 but showing only genes that were statistically significantly differentially expressed (padj ≤0.05) and had an average expression value of TPM >3 over all conditions. [file elife-56934-supp3.xlsx]

## Sheet: Read me
DESeq2 analysis of differential gene expression
Gene list has been filtered to display only genes that are statstically significantly changed (padj < 0.05) and whose expression on average over all experimental conditions is above 3 TPM
Samples:
0 hours: 4 Wnk1fl/flRag1-/-CD2-Cre and 3 Wnk1fl/+Rag1-/-CD2-Cre
3 hours: 3 Wnk1fl/flRag1-/-CD2-Cre and 3 Wnk1fl/+Rag1-/-CD2-Cre
24 hours: 3 Wnk1fl/flRag1-/-CD2-Cre and 3 Wnk1fl/+Rag1-/-CD2-Cre
48 hours: 3 Wnk1fl/flRag1-/-CD2-Cre and 3 Wnk1fl/+Rag1-/-CD2-Cre
Worksheets
Sheets show differential gene expression analysis between Wnk1fl/flRag1-/-CD2-Cre (KO) and Wnk1fl/+Rag1-/-CD2-Cre(HET) at 0, 3, 24 and 48 h after anti-CD3e injection
Columns	Meaning
ID	Gene ID in Ensembl
gene	Gene symbol in MGI
baseMean	Average of the normalized counts taken over all samples
log2FoldChange	Log2fold change between Wnk1fl/flRag1-/-CD2-Cre (KO) and Wnk1fl/+Rag1-/-CD2-Cre(HET)
lfcSE	Standard error of the log2FoldChange estimate
stat	Wald statistic
pvalue	Wald test p-value
padj	Benjamini-Hochberg adjusted p-value
NA, not available

## Sheet: 0 hours KO vs HET filtered
ID	gene	baseMean	log2FoldChange	lfcSE	stat	pvalue	padj
ENSMUSG00000050272	DSCAM	244.711	6.96997	0.465906	14.96	1.33972e-50	7.68105e-47
ENSMUSG00000030156	CD69	2429.08	5.25416	0.301117	17.4489	3.50965e-68	6.0366e-64
ENSMUSG00000029581	FSCN1	191.731	5.05515	0.475793	10.6247	2.28779e-26	1.71087e-23
ENSMUSG00000036492	RNF39	22.2693	4.47785	0.521968	8.57879	9.5879e-18	3.66471e-15
ENSMUSG00000022996	WNT10B	204.692	4.45914	0.336166	13.2647	3.71006e-40	1.59533e-36
ENSMUSG00000053175	BCL3	275.961	4.35467	0.407539	10.6853	1.19302e-26	9.77142e-24
ENSMUSG00000034855	CXCL10	323.532	4.33731	0.511389	8.48142	2.2246e-17	7.97149e-15
ENSMUSG00000035042	CCL5	172.739	4.01018	0.517493	7.74925	9.2439e-15	1.8928e-12
ENSMUSG00000026764	KIF5C	49.628	4.00848	0.440021	9.10975	8.25757e-20	4.30394e-17
ENSMUSG00000037679	INF2	865.64	3.83521	0.317081	12.0954	1.11712e-33	2.74492e-30
ENSMUSG00000017009	SDC4	90.9192	3.73672	0.461655	8.09418	5.7651e-16	1.4371e-13
ENSMUSG00000068923	SYT11	926.687	3.69562	0.329417	11.2186	3.30288e-29	4.73413e-26
ENSMUSG00000108090	GM6637	30.6277	3.62837	0.522085	6.94977	3.6587e-12	4.19531e-10
ENSMUSG00000023990	TFEB	376.744	3.58147	0.322739	11.0971	1.29569e-28	1.59185e-25
ENSMUSG00000092500	GM20400	198.893	3.36284	0.386935	8.69097	3.59349e-18	1.50751e-15
ENSMUSG00000021217	TSHZ3	40.9919	3.33157	0.469542	7.09535	1.29028e-12	1.57408e-10
ENSMUSG00000035298	KLHL35	30.6559	3.30533	0.442571	7.46849	8.11225e-14	1.35467e-11
ENSMUSG00000055170	IFNG	46.0667	3.28777	0.543258	6.05195	1.43102e-09	8.88578e-08
ENSMUSG00000086320	GM12840	172.401	3.22718	0.361829	8.91907	4.70225e-19	2.37878e-16
ENSMUSG00000026700	TNFSF4	39.3494	3.10309	0.457206	6.78707	1.14433e-11	1.20015e-09
ENSMUSG00000026358	RGS1	415.643	3.09339	0.367156	8.42528	3.59878e-17	1.21371e-14
ENSMUSG00000041782	LAD1	109.211	3.06472	0.495795	6.18143	6.35225e-10	4.33566e-08
ENSMUSG00000003032	KLF4	32.3313	3.01344	0.42271	7.12886	1.01201e-12	1.299e-10
ENSMUSG00000104213	IGHD	93.1549	2.98528	0.373148	8.00026	1.24154e-15	2.96589e-13
ENSMUSG00000032470	MRAS	100.279	2.95293	0.359348	8.21747	2.07839e-16	5.49973e-14
ENSMUSG00000023034	NR4A1	9276.64	2.9141	0.366168	7.95835	1.74355e-15	4.05257e-13
ENSMUSG00000047205	DUSP18	56.3447	2.89288	0.491824	5.88195	4.05471e-09	2.22815e-07
ENSMUSG00000025854	FAM20C	21.9673	2.89006	0.55841	5.17551	2.27288e-07	7.39494e-06
ENSMUSG00000062785	KCNC3	59.2078	2.79401	0.385638	7.24516	4.31942e-13	5.84992e-11
ENSMUSG00000002983	RELB	955.211	2.79026	0.232322	12.0103	3.13783e-33	6.74634e-30
ENSMUSG00000048481	MYPOP	71.8547	2.74325	0.331613	8.27244	1.31246e-16	3.71052e-14
ENSMUSG00000028121	BCAR3	34.6758	2.73341	0.597201	4.57703	4.71626e-06	0.000101909
ENSMUSG00000049709	NLRP10	52.8229	2.73303	0.489732	5.58067	2.39597e-08	1.03805e-06
ENSMUSG00000004267	ENO2	36.1271	2.73186	0.514392	5.31085	1.09118e-07	3.90193e-06
ENSMUSG00000081219	BAMBI-PS1	59.7084	2.70384	0.554933	4.87237	1.10268e-06	2.91786e-05
ENSMUSG00000028542	SLC6A9	35.4573	2.6649	0.550674	4.83935	1.30262e-06	3.38446e-05
ENSMUSG00000016498	PDCD1LG2	165.328	2.65686	0.446673	5.94812	2.71238e-09	1.5603e-07
ENSMUSG00000022696	SIDT1	769.957	2.64781	0.32117	8.24427	1.66165e-16	4.53658e-14
ENSMUSG00000003273	CAR11	13.41	2.62865	0.551604	4.76547	1.88411e-06	4.66956e-05
ENSMUSG00000040998	NPNT	228.808	2.61379	0.378842	6.89942	5.2214e-12	5.83169e-10
ENSMUSG00000044037	ALS2CL	758.681	2.56834	0.443506	5.79099	6.99712e-09	3.55016e-07
ENSMUSG00000025557	SLC15A1	1417.81	2.56001	0.394948	6.48189	9.05806e-11	7.75117e-09
ENSMUSG00000025790	SLCO3A1	691.844	2.5502	0.226873	11.2407	2.57358e-29	4.02415e-26
ENSMUSG00000038550	CIART	229.09	2.53744	0.305298	8.31134	9.46241e-17	2.85532e-14
ENSMUSG00000079071	GM14085	71.3088	2.52322	0.589747	4.27848	1.88174e-05	0.000323013
ENSMUSG00000021025	NFKBIA	3237.81	2.52217	0.206912	12.1896	3.53182e-34	1.01245e-30
ENSMUSG00000021375	KIF13A	566.06	2.51084	0.309497	8.11266	4.95237e-16	1.25266e-13
ENSMUSG00000031880	RRAD	611.794	2.4921	0.234548	10.6251	2.27769e-26	1.71087e-23
ENSMUSG00000089672	NA	32.6334	2.48384	0.546726	4.54311	5.5429e-06	0.00011655
ENSMUSG00000021636	MARVELD2	108.857	2.45973	0.432991	5.68079	1.34078e-08	6.29833e-07
ENSMUSG00000032285	DNAJA4	30.2526	2.42475	0.508932	4.76439	1.89423e-06	4.68787e-05
ENSMUSG00000089762	IER5L	25.7273	2.41999	0.499887	4.84107	1.29142e-06	3.36553e-05
ENSMUSG00000029304	SPP1	16.9297	2.4189	0.523826	4.61776	3.87907e-06	8.76742e-05
ENSMUSG00000044197	GPR146	1568.56	2.40944	0.290983	8.28037	1.22798e-16	3.64158e-14
ENSMUSG00000037124	TRIM58	47.8043	2.40499	0.632783	3.80066	0.000144312	0.00171302
ENSMUSG00000038936	SCCPDH	127.858	2.40275	0.399409	6.01575	1.79057e-09	1.09212e-07
ENSMUSG00000091705	H2-Q2	474.629	2.40085	0.521876	4.60043	4.21628e-06	9.36952e-05
ENSMUSG00000103034	GM8797	1290.56	2.38277	0.533161	4.46913	7.8538e-06	0.000156893
ENSMUSG00000054855	RND1	22.9383	2.37813	0.397699	5.97972	2.23523e-09	1.31664e-07
ENSMUSG00000028362	TNFSF8	709.387	2.37721	0.431511	5.50903	3.60808e-08	1.48112e-06
ENSMUSG00000062593	LILRB4A	105.066	2.3756	0.387831	6.12534	9.04894e-10	5.87327e-08
ENSMUSG00000029419	GM996	47.2574	2.36393	0.453553	5.21203	1.86784e-07	6.17825e-06
ENSMUSG00000068606	GM4841	51.7537	2.35312	0.519151	4.53264	5.82513e-06	0.000121593
ENSMUSG00000100529	GM19261	30.2162	2.34785	0.44278	5.30252	1.14214e-07	4.03492e-06
ENSMUSG00000051062	FBLL1	13.3469	2.34482	0.526108	4.45691	8.31483e-06	0.000164422
ENSMUSG00000028680	PLK3	470.076	2.32732	0.3161	7.36262	1.8033e-13	2.76936e-11
ENSMUSG00000036867	SMAD6	34.0719	2.31567	0.409079	5.6607	1.50754e-08	6.97033e-07
ENSMUSG00000038418	EGR1	7085.8	2.30457	0.345325	6.67364	2.49541e-11	2.4113e-09
ENSMUSG00000018500	ADORA2B	36.2053	2.30048	0.56493	4.07216	4.65797e-05	0.000680111
ENSMUSG00000036902	NETO2	298.194	2.29412	0.345518	6.63964	3.14447e-11	2.95546e-09
ENSMUSG00000050132	SARM1	32.9692	2.28334	0.519035	4.39919	1.08655e-05	0.000203287
ENSMUSG00000032997	CHPF	412.825	2.25107	0.272029	8.27511	1.28334e-16	3.71052e-14
ENSMUSG00000072437	NANOS1	277.834	2.23788	0.204412	10.9479	6.8023e-28	7.31247e-25
ENSMUSG00000020601	TRIB2	2415.53	2.23713	0.397257	5.63145	1.78697e-08	8.15276e-07
ENSMUSG00000019960	DUSP6	1515.43	2.23483	0.283732	7.87655	3.36555e-15	7.42146e-13
ENSMUSG00000003228	GRK5	287.279	2.23382	0.204601	10.918	9.45998e-28	9.57127e-25
ENSMUSG00000081824	BC002163	31.8072	2.23365	0.624918	3.57431	0.000351152	0.00354034
ENSMUSG00000028278	RRAGD	152.97	2.22953	0.383323	5.81632	6.01565e-09	3.11654e-07
ENSMUSG00000027254	MAP1A	152.301	2.21892	0.374113	5.93115	3.00822e-09	1.71329e-07
ENSMUSG00000038718	PBX3	20.9825	2.20723	0.447051	4.93732	7.92051e-07	2.20441e-05
ENSMUSG00000026994	GALNT3	404.234	2.204	0.266499	8.27018	1.33751e-16	3.71052e-14
ENSMUSG00000033377	PALMD	93.0718	2.19698	0.670269	3.27776	0.00104633	0.00859043
ENSMUSG00000024597	SLC12A2	480.358	2.18653	0.273	8.00927	1.15391e-15	2.79538e-13
ENSMUSG00000062585	CNR2	226.859	2.18318	0.506903	4.30689	1.65563e-05	0.000289105
ENSMUSG00000013089	ETV5	5607.81	2.18043	0.308786	7.0613	1.64953e-12	1.97849e-10
ENSMUSG00000027993	TRIM2	88.0168	2.17159	0.332686	6.52744	6.69023e-11	5.89618e-09
ENSMUSG00000041907	GPR45	72.6813	2.16827	0.467781	4.63522	3.56556e-06	8.16613e-05
ENSMUSG00000046727	CYSTM1	7.78255	2.16753	0.574114	3.77544	0.000159728	0.00186512
ENSMUSG00000066363	SERPINA3F	57.9449	2.16632	0.555456	3.90008	9.61619e-05	0.00123057
ENSMUSG00000047821	TRIM16	1128.42	2.15079	0.29673	7.24831	4.22002e-13	5.76067e-11
ENSMUSG00000031367	AP1S2	530.448	2.14621	0.256465	8.36843	5.83924e-17	1.82609e-14
ENSMUSG00000017692	RHBDL3	141.445	2.13537	0.456331	4.67943	2.87678e-06	6.79679e-05
ENSMUSG00000090877	HSPA1B	56.9604	2.1261	0.579153	3.67105	0.000241554	0.00262294
ENSMUSG00000062782	OLFR527	16.3651	2.12394	0.505481	4.20182	2.64783e-05	0.000430054
ENSMUSG00000033350	CHST2	447.125	2.12372	0.415869	5.10671	3.27821e-07	1.03649e-05
ENSMUSG00000032238	RORA	763.167	2.1151	0.458283	4.61527	3.92578e-06	8.84972e-05
ENSMUSG00000069114	ZBTB10	122.186	2.09323	0.443619	4.71854	2.37547e-06	5.71441e-05
ENSMUSG00000046280	SHE	233.92	2.0915	0.47815	4.37415	1.21907e-05	0.000224258
ENSMUSG00000052155	ACVR2A	80.9952	2.08139	0.35536	5.85712	4.70951e-09	2.51564e-07
ENSMUSG00000029417	CXCL9	37.5303	2.07988	0.442745	4.69768	2.63135e-06	6.26859e-05
ENSMUSG00000020142	SLC1A4	44.7509	2.07246	0.45182	4.58693	4.49813e-06	9.82923e-05
ENSMUSG00000029924	SLC37A3	1135.19	2.04996	0.24319	8.42947	3.47242e-17	1.19451e-14
ENSMUSG00000073409	H2-Q6	7629.99	2.04055	0.388151	5.25709	1.46349e-07	5.02435e-06
ENSMUSG00000025608	PODXL	242.695	2.03978	0.609699	3.34555	0.000821208	0.00706592
ENSMUSG00000034394	LIF	774.555	2.03922	0.413596	4.93046	8.20365e-07	2.26853e-05
ENSMUSG00000032501	TRIB1	1760.31	2.0338	0.26572	7.65391	1.94957e-14	3.60565e-12
ENSMUSG00000063388	BC023105	11.8721	2.0335	0.572679	3.55085	0.000383994	0.0037958
ENSMUSG00000079415	CNTF	42.1965	2.03284	0.486474	4.17873	2.93147e-05	0.00046343
ENSMUSG00000028950	TAS1R1	154.398	2.02898	0.524215	3.87051	0.000108608	0.00136155
ENSMUSG00000028341	NR4A3	1855.64	1.99562	0.375892	5.30904	1.10205e-07	3.93264e-06
ENSMUSG00000025402	NAB2	4585.68	1.99488	0.302913	6.58566	4.52863e-11	4.12445e-09
ENSMUSG00000042129	RASSF4	389.578	1.9879	0.33701	5.89865	3.66496e-09	2.04004e-07
ENSMUSG00000064352	MT-TS1	5.10726	1.98738	0.655505	3.03183	0.00243078	0.0163254
ENSMUSG00000029923	RAB19	754.699	1.98686	0.389251	5.10432	3.31992e-07	1.04202e-05
ENSMUSG00000028300	3110043O21RIK	107.858	1.98026	0.23388	8.46699	2.5182e-17	8.8394e-15
ENSMUSG00000020262	ADARB1	85.019	1.97164	0.452503	4.35719	1.31744e-05	0.000238778
ENSMUSG00000097223	GM2449	6.43566	1.96369	0.588884	3.33459	0.000854246	0.00728098
ENSMUSG00000027834	SERPINI1	271.665	1.96261	0.3007	6.5268	6.71891e-11	5.89618e-09
ENSMUSG00000047880	CXCR5	200.214	1.95901	0.497763	3.93563	8.29798e-05	0.0010962
ENSMUSG00000033538	CASP4	353.103	1.95558	0.340308	5.74648	9.11196e-09	4.45244e-07
ENSMUSG00000039782	CPEB2	101.522	1.95107	0.509761	3.82742	0.000129494	0.00156852
ENSMUSG00000001507	ITGA3	78.3598	1.94995	0.381903	5.10587	3.2928e-07	1.03877e-05
ENSMUSG00000048720	TBC1D12	40.922	1.94788	0.302791	6.4331	1.2503e-10	1.02896e-08
ENSMUSG00000029108	PCDH7	294.227	1.94542	0.371169	5.24133	1.59424e-07	5.40845e-06
ENSMUSG00000027784	PPM1L	1405.99	1.94344	0.178614	10.8807	1.42498e-27	1.36165e-24
ENSMUSG00000087298	GM9392	12.2043	1.93518	0.542141	3.56951	0.000357644	0.00359525
ENSMUSG00000035355	KCNH4	33.169	1.9302	0.501317	3.85026	0.000117992	0.00145794
ENSMUSG00000033502	CDC14A	811.476	1.91978	0.263291	7.2915	3.06515e-13	4.39338e-11
ENSMUSG00000030970	CTBP2	32.2393	1.91365	0.436865	4.38042	1.18453e-05	0.000219546
ENSMUSG00000025762	LARP1B	543.448	1.91184	0.166335	11.4939	1.41534e-30	2.43438e-27
ENSMUSG00000017167	CNTNAP1	943.478	1.90631	0.523516	3.64137	0.000271191	0.00288643
ENSMUSG00000028047	THBS3	15.0577	1.90147	0.465972	4.08065	4.49101e-05	0.000660217
ENSMUSG00000056708	IER5	1059.57	1.89134	0.170673	11.0817	1.53976e-28	1.76559e-25
ENSMUSG00000025359	PMEL	23.3141	1.8881	0.386132	4.88977	1.00953e-06	2.70045e-05
ENSMUSG00000037419	ENDOD1	610.899	1.87837	0.317043	5.92468	3.12913e-09	1.77043e-07
ENSMUSG00000026672	OPTN	25.7007	1.87725	0.421245	4.45644	8.33318e-06	0.000164559
ENSMUSG00000089809	RASGEF1B	89.0499	1.87697	0.35588	5.27417	1.33357e-07	4.62447e-06
ENSMUSG00000020669	SH3YL1	39.8551	1.87307	0.361213	5.18549	2.15448e-07	7.05847e-06
ENSMUSG00000097178	2310002F09RIK	14.1532	1.87005	0.599985	3.11683	0.0018281	0.0132148
ENSMUSG00000099041	GM28035	159.496	1.86979	0.442153	4.22882	2.34919e-05	0.000389268
ENSMUSG00000021614	VCAN	77.6796	1.86241	0.432066	4.31047	1.6291e-05	0.000285632
ENSMUSG00000018168	IKZF3	3845.6	1.86103	0.422648	4.40327	1.06634e-05	0.000200229
ENSMUSG00000105858	2310074N15RIK	8.52714	1.85675	0.504607	3.6796	0.000233604	0.0025566
ENSMUSG00000020227	IRAK3	106.383	1.85372	0.535066	3.46448	0.000531262	0.00492865
ENSMUSG00000027175	TCP11L1	108.947	1.85281	0.297369	6.23069	4.64389e-10	3.31422e-08
ENSMUSG00000029070	MXRA8	25.2097	1.84097	0.444001	4.14632	3.37855e-05	0.000521643
ENSMUSG00000024678	MS4A4D	16.4882	1.84021	0.492664	3.73523	0.000187547	0.0021363
ENSMUSG00000037664	CDKN1C	47.6539	1.83552	0.330184	5.5591	2.71171e-08	1.1488e-06
ENSMUSG00000043017	PTGIR	925.361	1.83407	0.429774	4.26752	1.97657e-05	0.000336578
ENSMUSG00000031355	ARHGAP6	39.7575	1.83131	0.462394	3.96049	7.47969e-05	0.00101061
ENSMUSG00000003153	SLC2A3	2696.17	1.81829	0.205705	8.83929	9.63252e-19	4.73369e-16
ENSMUSG00000036587	FUT7	452.479	1.81782	0.40369	4.50301	6.69986e-06	0.000137844
ENSMUSG00000031520	VEGFC	33.3624	1.81691	0.45826	3.96481	7.34532e-05	0.000996368
ENSMUSG00000048911	RNF24	213.966	1.81312	0.248032	7.31	2.67134e-13	3.96095e-11
ENSMUSG00000046532	AR	676.454	1.81156	0.44088	4.10897	3.97424e-05	0.000598049
ENSMUSG00000026342	SLC35F5	126.432	1.81141	0.360166	5.02938	4.92071e-07	1.45673e-05
ENSMUSG00000025779	LY96	52.1438	1.81122	0.353293	5.12669	2.94881e-07	9.39249e-06
ENSMUSG00000054871	TMEM158	81.2434	1.80664	0.419271	4.30901	1.6399e-05	0.000286941
ENSMUSG00000035849	KRT222	27.4459	1.79995	0.476579	3.77681	0.000158851	0.0018596
ENSMUSG00000055413	H2-Q5	729.553	1.7952	0.406732	4.41371	1.01615e-05	0.000192487
ENSMUSG00000040314	CTSG	19.3377	1.78471	0.61481	2.90287	0.0036976	0.0226491
ENSMUSG00000083218	GM16425	42.5137	1.78414	0.619284	2.88098	0.00396445	0.023951
ENSMUSG00000051615	RAP2A	584.282	1.781	0.223259	7.97729	1.49576e-15	3.52426e-13
ENSMUSG00000031428	ZCCHC18	134.885	1.77266	0.339791	5.21691	1.81931e-07	6.06436e-06
ENSMUSG00000028459	CD72	503.227	1.77133	0.339233	5.22157	1.77408e-07	5.95981e-06
ENSMUSG00000022265	ANK	291.833	1.76553	0.30421	5.80365	6.48855e-09	3.32152e-07
ENSMUSG00000036764	DNAJC12	262.246	1.76379	0.22985	7.67366	1.67155e-14	3.15942e-12
ENSMUSG00000046057	GM15428	10.6965	1.76187	0.621674	2.83407	0.00459589	0.0268612
ENSMUSG00000061175	FNIP2	79.3046	1.75931	0.414938	4.23995	2.23572e-05	0.000373706
ENSMUSG00000023032	SLC4A8	98.1026	1.75055	0.575747	3.04049	0.00236193	0.0159942
ENSMUSG00000029359	TESC	142.765	1.74033	0.381536	4.56137	5.08212e-06	0.000108587
ENSMUSG00000031079	ZFP300	36.6523	1.73803	0.370141	4.69558	2.65849e-06	6.32449e-05
ENSMUSG00000034028	CD226	606.998	1.73525	0.41605	4.17077	3.03567e-05	0.0004751
ENSMUSG00000002393	NR2F6	384.26	1.73361	0.252454	6.86705	6.55443e-12	7.22668e-10
ENSMUSG00000075269	BEX6	164.382	1.73345	0.421556	4.11202	3.92219e-05	0.000593213
ENSMUSG00000106344	MIR1892	11.9738	1.72989	0.5565	3.10851	0.00188032	0.0135433
ENSMUSG00000105112	GM42778	19.105	1.72659	0.589155	2.93063	0.0033828	0.0211118
ENSMUSG00000034449	DHRS11	171.769	1.71943	0.358636	4.79437	1.63187e-06	4.14597e-05
ENSMUSG00000097022	BC001981	5.60299	1.71862	0.580356	2.96132	0.00306325	0.0195068
ENSMUSG00000023905	TNFRSF12A	58.9153	1.71108	0.292904	5.84177	5.16494e-09	2.70959e-07
ENSMUSG00000031519	ASB5	26.2182	1.71059	0.388055	4.40811	1.04277e-05	0.000196447
ENSMUSG00000020424	GATSL3	271.431	1.70951	0.385434	4.43529	9.19493e-06	0.0001781
ENSMUSG00000027171	PRRG4	516.596	1.70495	0.313922	5.43113	5.59971e-08	2.18401e-06
ENSMUSG00000068205	MACROD2	84.4371	1.70204	0.230324	7.38976	1.47096e-13	2.30004e-11
ENSMUSG00000038068	RNF144B	74.7981	1.69389	0.353508	4.79167	1.65401e-06	4.18982e-05
ENSMUSG00000015243	ABCA1	609.989	1.69359	0.439537	3.85312	0.000116622	0.00144518
ENSMUSG00000005947	ITGAE	1337.17	1.69355	0.407866	4.15222	3.29259e-05	0.000510204
ENSMUSG00000023132	GZMA	12079.1	1.6914	0.409406	4.13135	3.60647e-05	0.000551389
ENSMUSG00000043807	LY6G5B	84.6085	1.68935	0.324862	5.2002	1.99072e-07	6.55945e-06
ENSMUSG00000025245	LZTFL1	2359.21	1.68661	0.26045	6.47576	9.43362e-11	8.03258e-09
ENSMUSG00000098557	KCTD12	1195.09	1.68467	0.322104	5.2302	1.69329e-07	5.72192e-06
ENSMUSG00000070858	GM1673	8.44837	1.68353	0.580747	2.89891	0.00374458	0.0228406
ENSMUSG00000032344	MB21D1	485.249	1.68255	0.269394	6.24568	4.21957e-10	3.03668e-08
ENSMUSG00000042510	AA986860	36.2744	1.6747	0.366914	4.56429	5.01198e-06	0.000107355
ENSMUSG00000063954	HIST2H2AA2	493.799	1.66619	0.271812	6.12994	8.79101e-10	5.74925e-08
ENSMUSG00000036181	HIST1H1C	686.645	1.65738	0.197063	8.4104	4.08618e-17	1.32608e-14
ENSMUSG00000038963	SLCO4A1	852.188	1.65471	0.276876	5.97637	2.28158e-09	1.33935e-07
ENSMUSG00000096655	1700065D16RIK	55.936	1.65224	0.334896	4.93361	8.07229e-07	2.2358e-05
ENSMUSG00000007617	HOMER1	436.227	1.64817	0.252499	6.52742	6.69108e-11	5.89618e-09
ENSMUSG00000056043	RGS9BP	61.3673	1.64661	0.33706	4.88521	1.03317e-06	2.75512e-05
ENSMUSG00000002980	BCAM	121.799	1.64536	0.262181	6.27567	3.48135e-10	2.54833e-08
ENSMUSG00000008855	HDAC5	1241.48	1.63882	0.219861	7.45386	9.06479e-14	1.47089e-11
ENSMUSG00000028332	HEMGN	114.508	1.63532	0.436919	3.74284	0.000181952	0.0020836
ENSMUSG00000041202	PLA2G2D	18.3398	1.63459	0.468437	3.48946	0.000483991	0.00456646
ENSMUSG00000032387	RBPMS2	38.943	1.63291	0.531731	3.07093	0.00213392	0.0148838
ENSMUSG00000036989	TRIM3	148.733	1.62878	0.244005	6.67519	2.46914e-11	2.39956e-09
ENSMUSG00000073643	WDFY1	652.715	1.62573	0.424451	3.83019	0.000128047	0.00155647
ENSMUSG00000040502	2009-03-01	290.527	1.62367	0.258725	6.27565	3.48173e-10	2.54833e-08
ENSMUSG00000020275	REL	1460.33	1.61469	0.232926	6.9322	4.14334e-12	4.68852e-10
ENSMUSG00000049580	TSKU	20.1052	1.61329	0.456176	3.53655	0.000405388	0.00396625
ENSMUSG00000031728	ZFP821	559.071	1.61091	0.28959	5.56273	2.65584e-08	1.12791e-06
ENSMUSG00000057606	COLQ	2009.36	1.60442	0.368885	4.34939	1.36517e-05	0.000246649
ENSMUSG00000043953	CCRL2	48.0895	1.59926	0.383513	4.17004	3.0455e-05	0.000476205
ENSMUSG00000070392	GM20634	239.873	1.59871	0.248324	6.43802	1.21045e-10	1.0156e-08
ENSMUSG00000078794	DACT3	31.687	1.59865	0.444527	3.59629	0.000322782	0.00333335
ENSMUSG00000021200	ASB2	277.038	1.59854	0.48239	3.31379	0.000920408	0.00778234
ENSMUSG00000055013	AGAP1	200.116	1.59325	0.399563	3.98748	6.67782e-05	0.000921818
ENSMUSG00000027030	STK39	558.316	1.59064	0.314674	5.0549	4.30624e-07	1.31325e-05
ENSMUSG00000042763	MANEAL	25.1092	1.58954	0.415464	3.82593	0.000130278	0.0015758
ENSMUSG00000060771	TSGA10	123.646	1.58895	0.287493	5.52692	3.25907e-08	1.35075e-06
ENSMUSG00000028655	MFSD2A	197.074	1.58567	0.35683	4.44376	8.84001e-06	0.000171916
ENSMUSG00000035172	PLEKHH3	125.643	1.58561	0.519904	3.0498	0.00228992	0.0156607
ENSMUSG00000021314	AMPH	35.1083	1.58463	0.614394	2.57918	0.00990345	0.0478213
ENSMUSG00000105652	4930519L02RIK	201.831	1.58356	0.483665	3.27409	0.00106004	0.00866569
ENSMUSG00000026782	ABI2	852.713	1.58104	0.196464	8.04747	8.45256e-16	2.07691e-13
ENSMUSG00000044468	FAM46C	108.632	1.5808	0.404799	3.90516	9.41626e-05	0.00120956
ENSMUSG00000035158	MITF	63.5866	1.58035	0.256068	6.17161	6.75982e-10	4.55956e-08
ENSMUSG00000090173	FBXW10	92.917	1.56966	0.464388	3.38007	0.000724667	0.00635284
ENSMUSG00000025912	MYBL1	94.3683	1.56662	0.444156	3.52719	0.000419995	0.0040744
ENSMUSG00000042622	MAFF	143.009	1.56465	0.265744	5.88783	3.91295e-09	2.16408e-07
ENSMUSG00000044162	TNIP3	20.726	1.55524	0.541156	2.87393	0.00405405	0.0244066
ENSMUSG00000040818	DENND6A	1643.58	1.55505	0.207205	7.50492	6.14673e-14	1.03651e-11
ENSMUSG00000083307	AA414768	46.9165	1.5545	0.49045	3.16954	0.00152678	0.0115229
ENSMUSG00000042759	APOBR	521.975	1.55303	0.343906	4.51585	6.30631e-06	0.000130446
ENSMUSG00000038304	CD160	1544.95	1.55235	0.384163	4.04086	5.32548e-05	0.000765231
ENSMUSG00000106978	N4BP2OS	51.3946	1.55076	0.29246	5.30247	1.14244e-07	4.03492e-06
ENSMUSG00000030499	KCTD15	88.5687	1.54922	0.449853	3.44384	0.000573514	0.00524965
ENSMUSG00000031712	IL15	21.2658	1.54615	0.457297	3.38107	0.00072205	0.00634283
ENSMUSG00000107319	GM42670	20.1565	1.54405	0.405163	3.81093	0.000138445	0.00166057
ENSMUSG00000025977	BOLL	33.3715	1.54369	0.383432	4.02598	5.67394e-05	0.000801246
ENSMUSG00000020474	POLM	388.435	1.54011	0.338326	4.55214	5.31031e-06	0.000112484
ENSMUSG00000052151	PLPP2	56.6503	1.5398	0.42146	3.65349	0.000258698	0.00278101
ENSMUSG00000025437	USP33	852.246	1.53895	0.270894	5.68099	1.33921e-08	6.29833e-07
ENSMUSG00000075502	KBTBD6	164.123	1.53344	0.345087	4.44362	8.84569e-06	0.000171916
ENSMUSG00000049811	FAM161A	13.8034	1.53229	0.562364	2.72472	0.00643551	0.0346667
ENSMUSG00000070604	VSIG10L	113.815	1.52986	0.290013	5.27514	1.32657e-07	4.6095e-06
ENSMUSG00000032715	TRIB3	50.9758	1.52816	0.494509	3.09025	0.00199985	0.0141728
ENSMUSG00000102059	GM20257	102.657	1.52447	0.292319	5.21509	1.83732e-07	6.11256e-06
ENSMUSG00000029530	CCR9	10899.1	1.52289	0.287323	5.30029	1.1562e-07	4.07512e-06
ENSMUSG00000107868	GM5112	34.9688	1.52287	0.346077	4.40038	1.08063e-05	0.00020247
ENSMUSG00000094377	GM24407	11.2799	1.51861	0.577034	2.63175	0.00849468	0.0425447
ENSMUSG00000097075	D830044I16RIK	13.0361	1.51409	0.493847	3.06591	0.00217006	0.0150627
ENSMUSG00000087049	BACH2IT1	8.02241	1.51188	0.50229	3.00997	0.00261277	0.0172315
ENSMUSG00000031555	ADAM9	324.675	1.50858	0.247941	6.08442	1.16912e-09	7.4477e-08
ENSMUSG00000038764	PTPN3	633.962	1.50833	0.427692	3.52667	0.000420813	0.00408004
ENSMUSG00000045672	COL27A1	328.898	1.50399	0.456274	3.29625	0.000979856	0.00817735
ENSMUSG00000051146	CAMK2N2	35.2378	1.50392	0.381363	3.94354	8.02887e-05	0.00106969
ENSMUSG00000105851	9130604C24RIK	65.2618	1.50315	0.269096	5.58594	2.32438e-08	1.01471e-06
ENSMUSG00000025997	IKZF2	7570.57	1.50233	0.271276	5.53803	3.05901e-08	1.27397e-06
ENSMUSG00000106874	GM20186	157.171	1.5022	0.413845	3.62987	0.000283564	0.00299589
ENSMUSG00000085255	TACO1OS	13.9645	1.49979	0.467233	3.20994	0.00132764	0.0102355
ENSMUSG00000096983	2010015M23RIK	47.4637	1.49499	0.281454	5.31166	1.08633e-07	3.89268e-06
ENSMUSG00000022500	LITAF	496.365	1.49214	0.345038	4.32456	1.52834e-05	0.000271005
ENSMUSG00000037995	IGSF9	41.097	1.49072	0.38514	3.87058	0.000108575	0.00136155
ENSMUSG00000056367	ACTR3B	53.2271	1.48595	0.501895	2.96068	0.00306964	0.019533
ENSMUSG00000026357	RGS18	298.234	1.48354	0.392725	3.77756	0.000158375	0.00185689
ENSMUSG00000054582	PABPC1L	22.1486	1.48277	0.520616	2.84811	0.00439794	0.0260036
ENSMUSG00000041481	SERPINA3G	170.258	1.48088	0.483075	3.06552	0.00217292	0.0150627
ENSMUSG00000073678	PGAP1	209.438	1.4779	0.360527	4.09926	4.14472e-05	0.000619367
ENSMUSG00000006356	CRIP2	239.459	1.47656	0.34253	4.31074	1.62707e-05	0.000285567
ENSMUSG00000032041	TIRAP	22.9175	1.47613	0.52418	2.81607	0.00486152	0.0279753
ENSMUSG00000021701	PLK2	62.206	1.47188	0.395324	3.72322	0.000196698	0.00221705
ENSMUSG00000078134	GM12355	27.59	1.4717	0.395797	3.71832	0.000200551	0.00224868
ENSMUSG00000038205	PRKAB2	269.375	1.47162	0.201915	7.28829	3.13906e-13	4.42556e-11
ENSMUSG00000038515	GRTP1	70.6226	1.46946	0.477308	3.07864	0.0020795	0.0146038
ENSMUSG00000058975	KCNC1	55.7316	1.46538	0.561714	2.60877	0.00908679	0.0447574
ENSMUSG00000032135	MCAM	117.032	1.46248	0.351551	4.16007	3.18156e-05	0.00049523
ENSMUSG00000041329	ATP1B2	76.7235	1.46083	0.379125	3.85316	0.000116602	0.00144518
ENSMUSG00000059674	CDH24	612.716	1.45532	0.29985	4.85351	1.21298e-06	3.18038e-05
ENSMUSG00000015766	EPS8	25.9814	1.45518	0.533191	2.72918	0.00634919	0.0343112
ENSMUSG00000002104	RAPSN	266.201	1.45228	0.498924	2.91083	0.00360465	0.0221587
ENSMUSG00000041649	KLF8	79.7946	1.45166	0.403286	3.59958	0.000318729	0.00331047
ENSMUSG00000053646	PLXNB1	247.27	1.44804	0.311116	4.65432	3.25046e-06	7.54494e-05
ENSMUSG00000031155	PIM2	1110.16	1.43917	0.382585	3.7617	0.00016876	0.00195335
ENSMUSG00000020570	SYPL	2997.95	1.4364	0.197118	7.28701	3.169e-13	4.43145e-11
ENSMUSG00000045287	RTN4RL1	806.103	1.43459	0.309797	4.63075	3.64336e-06	8.31111e-05
ENSMUSG00000004562	ARHGEF40	318.037	1.43262	0.324129	4.4199	9.8746e-06	0.000188715
ENSMUSG00000079227	CCR5	28.8499	1.43088	0.485178	2.9492	0.00318602	0.0201127
ENSMUSG00000054945	GM9958	61.0249	1.42828	0.303576	4.70486	2.5404e-06	6.07716e-05
ENSMUSG00000034842	ART3	25.2469	1.42764	0.545828	2.61555	0.00890838	0.0440933
ENSMUSG00000028480	GLIPR2	872.223	1.42565	0.271585	5.24935	1.5264e-07	5.19884e-06
ENSMUSG00000084230	GM14388	69.9643	1.42432	0.508237	2.80248	0.0050711	0.0288531
ENSMUSG00000019088	DNASE1L1	165.17	1.42336	0.202352	7.03407	2.00591e-12	2.36313e-10
ENSMUSG00000022797	TFRC	5857.96	1.42165	0.377527	3.76571	0.000166078	0.0019236
ENSMUSG00000032462	PIK3CB	139.801	1.41824	0.251842	5.63146	1.78691e-08	8.15276e-07
ENSMUSG00000042417	CCNO	38.9707	1.41677	0.435155	3.2558	0.00113075	0.00910863
ENSMUSG00000025289	PRDX4	311.967	1.41671	0.4019	3.52504	0.000423423	0.00409841
ENSMUSG00000050138	KCNK12	62.0554	1.41198	0.432326	3.26601	0.00109076	0.00886212
ENSMUSG00000024892	PCX	286.917	1.40736	0.30642	4.59293	4.37056e-06	9.61299e-05
ENSMUSG00000033276	STK36	35.9785	1.40436	0.302503	4.64246	3.44288e-06	7.91678e-05
ENSMUSG00000064358	MT-CO3	9999.23	1.4021	0.547279	2.56195	0.0104085	0.0497295
ENSMUSG00000052364	B630019K06RIK	36.9194	1.40136	0.471042	2.97501	0.00292976	0.018839
ENSMUSG00000070407	HS3ST3B1	206.847	1.40113	0.520434	2.69223	0.00709763	0.0373445
ENSMUSG00000025931	PAQR8	397.729	1.40061	0.343673	4.07541	4.5933e-05	0.00067181
ENSMUSG00000002083	BBC3	309.925	1.39759	0.286816	4.87276	1.1005e-06	2.91658e-05
ENSMUSG00000031530	DUSP4	1399.67	1.397	0.304161	4.59297	4.36991e-06	9.61299e-05
ENSMUSG00000096188	CMTM4	510.372	1.39378	0.159103	8.7602	1.94896e-18	8.83432e-16
ENSMUSG00000024524	GNAL	94.285	1.38646	0.268341	5.1668	2.38133e-07	7.69905e-06
ENSMUSG00000030410	DMWD	976.141	1.38496	0.343803	4.02836	5.61669e-05	0.000795775
ENSMUSG00000052658	5830454E08RIK	81.2416	1.3791	0.241979	5.69924	1.20341e-08	5.78174e-07
ENSMUSG00000014303	GLIS2	256.853	1.37197	0.265476	5.16797	2.36649e-07	7.66548e-06
ENSMUSG00000047632	FGFBP3	70.8598	1.37031	0.23393	5.85777	4.69135e-09	2.51374e-07
ENSMUSG00000044583	TLR7	122.694	1.36746	0.370391	3.69194	0.000222552	0.00246008
ENSMUSG00000104950	4833413G10RIK	108.677	1.36677	0.295684	4.6224	3.7933e-06	8.59614e-05
ENSMUSG00000066952	MYO1H	92.2042	1.3641	0.332967	4.0968	4.18895e-05	0.000623809
ENSMUSG00000025855	PRKAR1B	16.4387	1.36278	0.493723	2.76022	0.00577617	0.0319762
ENSMUSG00000018102	HIST1H2BC	681.057	1.36253	0.303693	4.48653	7.23909e-06	0.000146558
ENSMUSG00000034336	INA	55.3193	1.36033	0.382094	3.5602	0.000370575	0.0036822
ENSMUSG00000107096	GM43597	83.3454	1.35837	0.326269	4.16334	3.13628e-05	0.000488623
ENSMUSG00000040747	CD53	12048.4	1.35416	0.310236	4.36494	1.27156e-05	0.000231895
ENSMUSG00000026836	ACVR1	26.8351	1.35154	0.431982	3.12869	0.0017559	0.0128517
ENSMUSG00000024620	PDGFRB	8040.89	1.34957	0.225547	5.98354	2.18343e-09	1.29485e-07
ENSMUSG00000005802	SLC30A4	1821.05	1.34694	0.259934	5.18185	2.19697e-07	7.18399e-06
ENSMUSG00000055866	PER2	339.371	1.34305	0.258592	5.19371	2.06141e-07	6.76645e-06
ENSMUSG00000038079	TMEM237	279.772	1.34098	0.23782	5.63862	1.7142e-08	7.86249e-07
ENSMUSG00000039232	STX11	48.4063	1.34087	0.33344	4.02133	5.78715e-05	0.000813892
ENSMUSG00000022667	CD200R1	99.5501	1.34071	0.437365	3.06543	0.00217358	0.0150627
ENSMUSG00000048142	NAT8L	198.02	1.33971	0.3483	3.84645	0.000119844	0.00147553
ENSMUSG00000042042	CSGALNACT2	552.244	1.33967	0.222807	6.01266	1.82503e-09	1.10744e-07
ENSMUSG00000021185	9030617O03RIK	472.313	1.33857	0.38188	3.50522	0.00045623	0.00435469
ENSMUSG00000051727	KCTD14	162.922	1.33708	0.36655	3.64775	0.000264545	0.00283475
ENSMUSG00000022102	DOK2	4626.03	1.33592	0.273375	4.88676	1.02507e-06	2.73776e-05
ENSMUSG00000040631	DOK4	41.32	1.3357	0.440341	3.03334	0.00241864	0.0162566
ENSMUSG00000087406	E130215H24RIK	88.3096	1.33565	0.286301	4.6652	3.08315e-06	7.20519e-05
ENSMUSG00000057897	CAMK2B	544.93	1.33466	0.374134	3.56733	0.000360635	0.00361476
ENSMUSG00000047648	FBXO30	353.473	1.32899	0.288225	4.61095	4.00823e-06	8.97677e-05
ENSMUSG00000109836	GM45884	212.407	1.32741	0.420825	3.1543	0.00160885	0.0120105
ENSMUSG00000084910	C630043F03RIK	23.8816	1.3274	0.434058	3.05812	0.0022273	0.0153177
ENSMUSG00000075602	LY6A	2507.26	1.32224	0.341184	3.87545	0.000106426	0.00133909
ENSMUSG00000039959	HIP1	732.262	1.32222	0.354854	3.7261	0.000194462	0.00220049
ENSMUSG00000021823	VCL	627.374	1.32219	0.232536	5.68596	1.30081e-08	6.16361e-07
ENSMUSG00000021959	LATS2	1314.79	1.31819	0.262711	5.01765	5.23065e-07	1.53528e-05
ENSMUSG00000019055	PLOD1	891.578	1.31812	0.237613	5.54733	2.90059e-08	1.2228e-06
ENSMUSG00000042340	CTF1	20.5526	1.31721	0.479842	2.74508	0.00604954	0.0331482
ENSMUSG00000027660	SKIL	957.667	1.31647	0.25674	5.12766	2.93367e-07	9.36163e-06
ENSMUSG00000019732	CALR3	50.6176	1.31628	0.289628	4.54471	5.50098e-06	0.00011581
ENSMUSG00000052837	JUNB	1820.17	1.315	0.213001	6.17367	6.67239e-10	4.51831e-08
ENSMUSG00000045414	1190002N15RIK	3248.18	1.31242	0.220531	5.95119	2.66203e-09	1.53647e-07
ENSMUSG00000106025	GM42940	30.307	1.31228	0.403551	3.25182	0.00114669	0.0092051
ENSMUSG00000044934	ZFP367	1040.58	1.31132	0.32296	4.06032	4.90056e-05	0.000712507
ENSMUSG00000041556	FBXO2	12.2682	1.30974	0.498446	2.62766	0.00859755	0.0429379
ENSMUSG00000062373	TMEM65	192.756	1.29847	0.311173	4.17283	3.0084e-05	0.000471682
ENSMUSG00000087452	GM11998	79.5487	1.29843	0.468074	2.77398	0.00553749	0.0308936
ENSMUSG00000032370	LACTB	557.455	1.29843	0.180172	7.20661	5.7363e-13	7.58957e-11
ENSMUSG00000030806	STX1B	35.253	1.29472	0.493009	2.62615	0.00863572	0.0430638
ENSMUSG00000000562	ADORA3	25.1509	1.29451	0.487303	2.65648	0.00789618	0.0403489
ENSMUSG00000036019	TMTC2	210.445	1.29292	0.30985	4.17274	3.00959e-05	0.000471682
ENSMUSG00000025058	5430427O19RIK	212.982	1.2904	0.25537	5.05308	4.34748e-07	1.31881e-05
ENSMUSG00000048406	B330016D10RIK	131.186	1.28726	0.198198	6.49483	8.31298e-11	7.18509e-09
ENSMUSG00000044786	ZFP36	2267.13	1.28565	0.288616	4.45452	8.40798e-06	0.000165656
ENSMUSG00000016526	DYRK3	212.72	1.28521	0.280746	4.57785	4.6978e-06	0.000101766
ENSMUSG00000096056	GM21986	58.9808	1.28338	0.271083	4.73428	2.19829e-06	5.33047e-05
ENSMUSG00000019302	ATP6V0A1	199.907	1.28244	0.306973	4.17771	2.94465e-05	0.000464235
ENSMUSG00000048878	HEXIM1	3042.01	1.28012	0.117968	10.8514	1.96391e-27	1.77786e-24
ENSMUSG00000097842	9330104G04RIK	25.6931	1.27773	0.432975	2.95105	0.00316696	0.0200192
ENSMUSG00000024164	C3	76.8202	1.27103	0.412575	3.08074	0.0020649	0.0145439
ENSMUSG00000030137	TUBA8	1382.85	1.2707	0.355927	3.57012	0.000356819	0.00359115
ENSMUSG00000034266	BATF	895.577	1.26891	0.253191	5.01168	5.39557e-07	1.57295e-05
ENSMUSG00000046731	KCTD11	101.617	1.26824	0.280898	4.51494	6.33336e-06	0.000130773
ENSMUSG00000026637	TRAF5	167.749	1.26423	0.45985	2.74922	0.00597373	0.0328584
ENSMUSG00000098090	2700099C18RIK	188.888	1.26344	0.342578	3.68805	0.000225981	0.00248999
ENSMUSG00000035133	ARHGAP5	1150.29	1.2628	0.345568	3.65427	0.000257917	0.00277435
ENSMUSG00000050192	EIF5A2	319.622	1.26278	0.27378	4.61237	3.98101e-06	8.93909e-05
ENSMUSG00000019944	RHOBTB1	35.8734	1.26128	0.355432	3.54857	0.000387325	0.00382434
ENSMUSG00000030103	BHLHE40	1171.3	1.25928	0.252607	4.98512	6.19226e-07	1.78297e-05
ENSMUSG00000053580	TANC2	379.641	1.25767	0.376133	3.34368	0.000826754	0.00709235
ENSMUSG00000055435	MAF	1762.49	1.25547	0.25288	4.96469	6.88094e-07	1.94764e-05
ENSMUSG00000029560	SNX8	108.806	1.25294	0.324445	3.86181	0.000112552	0.00140152
ENSMUSG00000030309	CAPRIN2	213.737	1.24767	0.1851	6.74049	1.57848e-11	1.59705e-09
ENSMUSG00000053137	MAPK11	560.507	1.24396	0.468149	2.65718	0.00787977	0.040289
ENSMUSG00000029223	UCHL1	252.117	1.24174	0.345398	3.59509	0.000324275	0.00334184
ENSMUSG00000022791	TNK2	4289.19	1.23759	0.344309	3.59443	0.000325103	0.00334636
ENSMUSG00000097887	GM26542	23.6917	1.23608	0.363571	3.39983	0.000674282	0.00597509
ENSMUSG00000033450	TAGAP	1278	1.23434	0.381268	3.23747	0.00120595	0.0095631
ENSMUSG00000001089	LUZP1	768.804	1.23359	0.220867	5.5852	2.33435e-08	1.01648e-06
ENSMUSG00000057706	MEX3B	1827.94	1.2316	0.206675	5.95913	2.53578e-09	1.46853e-07
ENSMUSG00000045441	GPRIN3	1503.06	1.23129	0.332912	3.69855	0.000216834	0.00240902
ENSMUSG00000019943	ATP2B1	1708.26	1.2312	0.195903	6.28478	3.28328e-10	2.44469e-08
ENSMUSG00000045140	PIGW	268.832	1.23111	0.204955	6.00671	1.89321e-09	1.13857e-07
ENSMUSG00000048807	SLC35E4	140.913	1.22937	0.336951	3.64852	0.000263754	0.00283005
ENSMUSG00000051427	CCDC157	256.507	1.22788	0.262858	4.67128	2.99332e-06	7.01432e-05
ENSMUSG00000043155	HPDL	26.6791	1.22748	0.454957	2.69802	0.00697533	0.0367936
ENSMUSG00000028970	ABCB1B	381.506	1.22507	0.275459	4.44737	8.69271e-06	0.00016971
ENSMUSG00000019831	WASF1	26.8719	1.22503	0.439051	2.79018	0.00526781	0.0296584
ENSMUSG00000031995	ST14	559.683	1.22296	0.434565	2.8142	0.00488984	0.0281006
ENSMUSG00000003545	FOSB	199.414	1.22264	0.361597	3.38122	0.000721658	0.00634263
ENSMUSG00000099757	BE692007	149.112	1.22243	0.434155	2.81565	0.00486787	0.0279969
ENSMUSG00000051341	ZFP52	397.832	1.21849	0.313993	3.88062	0.000104191	0.00131771
ENSMUSG00000040794	C1QTNF4	14.0862	1.21674	0.411689	2.95548	0.00312179	0.0198063
ENSMUSG00000090164	BC035044	1015.93	1.21544	0.304205	3.99546	6.45689e-05	0.000896356
ENSMUSG00000020841	CPD	206.582	1.2151	0.26656	4.55847	5.15274e-06	0.000109687
ENSMUSG00000057132	RPGRIP1	406.803	1.21476	0.25435	4.77593	1.78879e-06	4.47198e-05
ENSMUSG00000043110	LRRN4	117.522	1.21361	0.428297	2.83357	0.00460305	0.0268837
ENSMUSG00000029499	PXMP2	111.611	1.21293	0.272616	4.44924	8.61742e-06	0.000168815
ENSMUSG00000035578	IQCG	73.2835	1.21249	0.280394	4.32424	1.5306e-05	0.000271125
ENSMUSG00000015882	LCORL	612.069	1.21248	0.353489	3.43003	0.000603508	0.00547486
ENSMUSG00000028212	CCNE2	970.415	1.21207	0.406044	2.98508	0.00283501	0.0183657
ENSMUSG00000015312	GADD45B	231.471	1.211	0.282797	4.28224	1.85022e-05	0.000318238
ENSMUSG00000053198	PRX	320.238	1.21003	0.240921	5.02251	5.10014e-07	1.49953e-05
ENSMUSG00000021998	LCP1	46753	1.20975	0.172886	6.99738	2.608e-12	3.01058e-10
ENSMUSG00000107742	9530085L11RIK	52.4194	1.20748	0.304088	3.97084	7.16212e-05	0.000976136
ENSMUSG00000021365	NEDD9	2896.3	1.20655	0.223174	5.40633	6.43289e-08	2.48085e-06
ENSMUSG00000063972	NR6A1	105.797	1.20424	0.219044	5.49771	3.84758e-08	1.57193e-06
ENSMUSG00000032417	RWDD2A	58.7445	1.20169	0.267774	4.48771	7.19941e-06	0.000146026
ENSMUSG00000040997	ABHD4	1728.01	1.19759	0.20391	5.87316	4.27559e-09	2.33461e-07
ENSMUSG00000037999	ARAP2	2535.21	1.19447	0.257726	4.63463	3.57568e-06	8.17841e-05
ENSMUSG00000000732	ICOSL	385.678	1.19443	0.263992	4.5245	6.0539e-06	0.000125757
ENSMUSG00000097487	PTGES3L	40.6695	1.19233	0.360446	3.30792	0.000939921	0.00788617
ENSMUSG00000049804	ARMCX4	973.813	1.19094	0.334005	3.56563	0.00036299	0.0036299
ENSMUSG00000060470	ADGRG3	1526.57	1.19008	0.431479	2.75814	0.00581305	0.0321287
ENSMUSG00000082674	GM11914	102.072	1.18983	0.388126	3.06557	0.00217252	0.0150627
ENSMUSG00000075514	GM13375	33.208	1.18893	0.389056	3.05593	0.0022436	0.015399
ENSMUSG00000031149	PRAF2	943.21	1.18824	0.259589	4.5774	4.70795e-06	0.000101858
ENSMUSG00000050855	ZFP940	466.788	1.18803	0.122035	9.73522	2.13355e-22	1.31061e-19
ENSMUSG00000043635	ADAMTS3	188.202	1.18772	0.227659	5.2171	1.81741e-07	6.06436e-06
ENSMUSG00000029552	TES	5098.66	1.18757	0.370243	3.20755	0.0013387	0.0103069
ENSMUSG00000021094	DHRS7	223.315	1.18586	0.418428	2.83408	0.00459578	0.0268612
ENSMUSG00000030031	KBTBD8	420.012	1.18514	0.256257	4.62482	3.74933e-06	8.51894e-05
ENSMUSG00000079659	TMEM243	250.254	1.18478	0.234458	5.05326	4.34325e-07	1.31881e-05
ENSMUSG00000037405	ICAM1	1100.85	1.18213	0.173783	6.80234	1.02932e-11	1.08616e-09
ENSMUSG00000041977	ARHGEF11	555.971	1.18056	0.353916	3.33571	0.000850814	0.00725533
ENSMUSG00000022885	ST6GAL1	5568.77	1.1804	0.330725	3.56913	0.000358164	0.00359838
ENSMUSG00000073664	NBEAL1	533.657	1.17933	0.384616	3.06625	0.00216764	0.0150627
ENSMUSG00000021281	TNFAIP2	23.437	1.17902	0.452968	2.60287	0.00924478	0.0453537
ENSMUSG00000031749	ST3GAL2	1379.84	1.17639	0.429369	2.73981	0.00614743	0.0335091
ENSMUSG00000099655	2310034G01RIK	27.7148	1.17461	0.364361	3.22376	0.00126517	0.00988416
ENSMUSG00000106990	GM42547	491.664	1.17386	0.280029	4.19193	2.76588e-05	0.000442952
ENSMUSG00000066632	PGK1-RS7	2502.84	1.17381	0.346233	3.39024	0.000698314	0.00615633
ENSMUSG00000045932	IFIT2	884.162	1.17201	0.335211	3.49633	0.000471696	0.00447007
ENSMUSG00000099583	HIST1H3D	40.7836	1.17113	0.439302	2.6659	0.00767834	0.0395411
ENSMUSG00000108176	GM43965	31.3658	1.17104	0.421012	2.78148	0.00541116	0.0302969
ENSMUSG00000041633	KCTD12B	51.8812	1.16949	0.392827	2.97711	0.00290979	0.0187587
ENSMUSG00000036622	ATP13A2	5158.71	1.16915	0.257509	4.54025	5.61882e-06	0.000118002
ENSMUSG00000001627	IFRD1	1004.73	1.16761	0.186364	6.26519	3.72373e-10	2.70657e-08
ENSMUSG00000026094	STK17B	8525.59	1.16654	0.240989	4.84065	1.29416e-06	3.36756e-05
ENSMUSG00000047227	GM527	24.6462	1.16437	0.371989	3.13012	0.00174732	0.0127944
ENSMUSG00000058402	ZFP420	153.663	1.16294	0.228156	5.09711	3.44872e-07	1.0746e-05
ENSMUSG00000022015	TNFSF11	1073.56	1.15742	0.222609	5.19935	1.99989e-07	6.57709e-06
ENSMUSG00000041075	FZD7	252.4	1.15728	0.316249	3.6594	0.000252808	0.0027245
ENSMUSG00000082163	GM14276	64.0181	1.15384	0.323535	3.56636	0.000361975	0.00362396
ENSMUSG00000039384	DUSP10	1788.03	1.15236	0.23624	4.87793	1.07207e-06	2.85003e-05
ENSMUSG00000046314	STXBP6	38.5597	1.14986	0.41821	2.74947	0.00596911	0.0328483
ENSMUSG00000031565	FGFR1	432.057	1.14632	0.290826	3.94159	8.09432e-05	0.00107342
ENSMUSG00000065947	MT-ND4L	9198.92	1.14499	0.389237	2.94162	0.003265	0.0205064
ENSMUSG00000049119	FAM110B	171.322	1.14481	0.362757	3.15586	0.00160024	0.0119722
ENSMUSG00000032348	GSTA4	88.9924	1.14474	0.282919	4.04618	5.20592e-05	0.000749931
ENSMUSG00000030203	DUSP16	594.594	1.14327	0.206735	5.53011	3.20035e-08	1.32961e-06
ENSMUSG00000045975	C2CD2	678.26	1.14306	0.1171	9.7614	1.64863e-22	1.09063e-19
ENSMUSG00000021376	TPMT	64.7956	1.14028	0.28875	3.94902	7.84706e-05	0.00104953
ENSMUSG00000110185	IGIP	91.2173	1.13978	0.37909	3.00663	0.00264165	0.0173753
ENSMUSG00000043629	1700019D03RIK	40.4025	1.13941	0.375694	3.03282	0.00242282	0.0162783
ENSMUSG00000021003	GALC	429.393	1.13938	0.11695	9.74247	1.98665e-22	1.26557e-19
ENSMUSG00000034173	ZBED5	250.543	1.13723	0.248572	4.57506	4.76093e-06	0.000102745
ENSMUSG00000073902	GM1966	1624.06	1.13222	0.359262	3.15151	0.00162426	0.0120888
ENSMUSG00000092622	KHDC3	22.8994	1.13156	0.39472	2.86674	0.00414717	0.0248715
ENSMUSG00000053897	SLC39A8	373.251	1.1306	0.234034	4.83092	1.35905e-06	3.50985e-05
ENSMUSG00000058715	FCER1G	189.067	1.13024	0.337006	3.35377	0.000797198	0.00687998
ENSMUSG00000073987	GGH	372.304	1.12943	0.27371	4.12639	3.68507e-05	0.000561409
ENSMUSG00000022722	ARL6	71.3091	1.1289	0.367601	3.07098	0.00213357	0.0148838
ENSMUSG00000008305	TLE1	562.131	1.12866	0.260583	4.33128	1.48244e-05	0.000264502
ENSMUSG00000031799	TPM4	6746.58	1.12852	0.257984	4.37437	1.21786e-05	0.000224258
ENSMUSG00000037465	KLF10	1415.9	1.12846	0.200961	5.61529	1.96235e-08	8.81266e-07
ENSMUSG00000100975	GM28875	178.451	1.1282	0.224997	5.01428	5.32326e-07	1.55714e-05
ENSMUSG00000034903	COBLL1	697.39	1.1271	0.304795	3.69791	0.000217383	0.00241225
ENSMUSG00000027007	SSFA2	961.045	1.12471	0.171366	6.56318	5.26714e-11	4.76814e-09
ENSMUSG00000049321	ZFP2	92.3982	1.12402	0.370346	3.03506	0.00240486	0.0161893
ENSMUSG00000020646	MBOAT2	35.3334	1.12346	0.430744	2.60818	0.00910238	0.0448213
ENSMUSG00000051817	SOX12	724.646	1.12337	0.378296	2.96955	0.00298233	0.0190975
ENSMUSG00000066595	MFSD7B	922.631	1.12068	0.203703	5.50152	3.76524e-08	1.54195e-06
ENSMUSG00000020063	SIRT1	1181	1.11887	0.252507	4.43103	9.37861e-06	0.000181046
ENSMUSG00000048012	ZFP473	96.5845	1.11753	0.285036	3.92066	8.83075e-05	0.00114893
ENSMUSG00000043019	EDEM3	1987.36	1.11748	0.232334	4.80979	1.51086e-06	3.86134e-05
ENSMUSG00000074826	GM10767	55.0243	1.11698	0.32708	3.41502	0.000637783	0.00570159
ENSMUSG00000022634	YAF2	615.382	1.11556	0.179061	6.23004	4.66303e-10	3.31422e-08
ENSMUSG00000062101	ZFP119B	135.78	1.11494	0.322291	3.45943	0.000541317	0.00499498
ENSMUSG00000008496	POU2F2	155.755	1.11465	0.422918	2.63561	0.0083985	0.0422697
ENSMUSG00000019796	LRP11	57.6906	1.1145	0.369338	3.01755	0.00254824	0.0169398
ENSMUSG00000039629	STRIP2	1153.81	1.11091	0.311846	3.56237	0.000367523	0.00367096
ENSMUSG00000028793	RNF19B	1784.05	1.1098	0.166629	6.66032	2.73233e-11	2.61089e-09
ENSMUSG00000031012	CASK	82.1989	1.10515	0.372051	2.97042	0.00297389	0.019072
ENSMUSG00000027806	TSC22D2	970.812	1.10491	0.184675	5.983	2.1907e-09	1.29485e-07
ENSMUSG00000048644	CTXN1	318.331	1.10488	0.254506	4.34128	1.41652e-05	0.000254142
ENSMUSG00000022863	BTG3	347.45	1.10448	0.389182	2.83796	0.00454031	0.0266363
ENSMUSG00000053560	IER2	2533.62	1.10292	0.207627	5.31202	1.08417e-07	3.89268e-06
ENSMUSG00000059482	2610301B20RIK	739.483	1.10287	0.179644	6.13923	8.29207e-10	5.48552e-08
ENSMUSG00000027663	ZMAT3	407.558	1.10196	0.249805	4.41129	1.02758e-05	0.000194011
ENSMUSG00000028161	PPP3CA	2184.77	1.09908	0.149443	7.35452	1.91614e-13	2.9166e-11
ENSMUSG00000101438	GM19412	46.2603	1.09781	0.351937	3.11934	0.00181256	0.0131467
ENSMUSG00000024610	CD74	1265.79	1.09315	0.311352	3.51098	0.000446463	0.00428047
ENSMUSG00000109398	GM3854	53.6862	1.0928	0.315034	3.46884	0.000522703	0.00486762
ENSMUSG00000067336	BMPR2	616.312	1.09279	0.307636	3.55221	0.000382007	0.00378051
ENSMUSG00000103103	4833445I07RIK	68.4846	1.09241	0.276643	3.94881	7.85403e-05	0.00104964
ENSMUSG00000041895	WIPI1	109.326	1.08928	0.366759	2.97003	0.00297775	0.0190896
ENSMUSG00000063286	GM8995	12102.9	1.08912	0.30435	3.57853	0.000345531	0.00349596
ENSMUSG00000097093	C330013E15RIK	21.8762	1.08903	0.376506	2.89247	0.00382224	0.023243
ENSMUSG00000039286	FNDC3B	133.238	1.08758	0.330802	3.28771	0.00101006	0.00836447
ENSMUSG00000027134	LPCAT4	885.792	1.08487	0.187806	5.77652	7.62634e-09	3.82429e-07
ENSMUSG00000099689	ZFP383	165.158	1.0841	0.243621	4.44993	8.58981e-06	0.000168658
ENSMUSG00000028412	SLC44A1	852.393	1.08265	0.164021	6.60069	4.09246e-11	3.80488e-09
ENSMUSG00000047777	PHF13	855.582	1.08238	0.140747	7.69022	1.4688e-14	2.84077e-12
ENSMUSG00000040339	FAM102B	1557.09	1.0808	0.391843	2.75825	0.00581123	0.0321287
ENSMUSG00000022636	ALCAM	410.594	1.07858	0.327602	3.29235	0.000993556	0.00827162
ENSMUSG00000024521	PMAIP1	233.096	1.07817	0.327971	3.2874	0.00101117	0.00836963
ENSMUSG00000027805	PFN2	95.0319	1.07486	0.224215	4.7939	1.63567e-06	4.1495e-05
ENSMUSG00000083899	GM12346	196.501	1.07246	0.333414	3.21661	0.00129715	0.0100573
ENSMUSG00000012889	PODNL1	807.028	1.06949	0.230284	4.64424	3.41324e-06	7.88023e-05
ENSMUSG00000041025	IFFO2	318.619	1.06802	0.323089	3.30565	0.000947549	0.00794242
ENSMUSG00000038291	SNX25	562.744	1.0664	0.167427	6.36938	1.89796e-10	1.47049e-08
ENSMUSG00000033577	MYO6	637.846	1.06405	0.399361	2.66437	0.00771325	0.0396734
ENSMUSG00000031803	B3GNT3	75.0396	1.06338	0.233675	4.55067	5.34762e-06	0.000113135
ENSMUSG00000014547	WDFY2	263.448	1.06306	0.22034	4.82462	1.40268e-06	3.61168e-05
ENSMUSG00000042271	NXT2	172.411	1.06233	0.295184	3.59889	0.000319583	0.00331534
ENSMUSG00000056592	ZFP658	397.237	1.06232	0.161973	6.55862	5.43065e-11	4.89043e-09
ENSMUSG00000034317	TRIM59	3281.15	1.06124	0.294938	3.59819	0.000320445	0.00331827
ENSMUSG00000020572	NAMPT	2118.78	1.06	0.210222	5.04228	4.60007e-07	1.37842e-05
ENSMUSG00000022186	OXCT1	4725.88	1.05994	0.213008	4.97607	6.48884e-07	1.86014e-05
ENSMUSG00000040957	CABLES1	40.1247	1.05943	0.360843	2.93599	0.00332482	0.0207877
ENSMUSG00000064363	MT-ND4	93764.8	1.0589	0.295778	3.58004	0.000343536	0.00348192
ENSMUSG00000031755	BBS2	331.676	1.05705	0.213252	4.95683	7.16508e-07	2.02032e-05
ENSMUSG00000032540	ABHD5	139.977	1.05639	0.395133	2.6735	0.00750636	0.0389235
ENSMUSG00000046169	ADAMTS6	482.362	1.0556	0.338516	3.11833	0.00181881	0.0131666
ENSMUSG00000035356	NFKBIZ	273.012	1.05503	0.288006	3.66323	0.000249051	0.00269244
ENSMUSG00000034640	TIPARP	539.97	1.05124	0.210884	4.98491	6.19893e-07	1.78297e-05
ENSMUSG00000106205	C230096K16RIK	74.1204	1.05119	0.360049	2.91956	0.00350527	0.0217029
ENSMUSG00000031245	HMGN5	1792.97	1.04997	0.319194	3.28943	0.00100389	0.0083254
ENSMUSG00000043154	PPP2R3A	297.035	1.04884	0.237567	4.41493	1.01042e-05	0.000191703
ENSMUSG00000067203	H2-K2	71.7313	1.04787	0.399045	2.62595	0.00864067	0.0430657
ENSMUSG00000043931	GIMAP7	848.484	1.047	0.314494	3.32917	0.000871056	0.00741691
ENSMUSG00000064125	PRR36	280.252	1.04686	0.322105	3.25006	0.00115379	0.00925184
ENSMUSG00000028214	GEM	801.86	1.04551	0.394683	2.64899	0.00807332	0.0410346
ENSMUSG00000076431	SOX4	19351.9	1.04497	0.104472	10.0024	1.4879e-23	1.02368e-20
ENSMUSG00000097354	2310001H17RIK	395.409	1.04181	0.180464	5.77297	7.78873e-09	3.89437e-07
ENSMUSG00000026062	SLC9A2	140.549	1.04061	0.279298	3.72579	0.000194707	0.0022009
ENSMUSG00000039637	CORO7	11055.7	1.03982	0.244362	4.25523	2.08838e-05	0.000352504
ENSMUSG00000020097	SGPL1	2285.79	1.03936	0.169593	6.12852	8.86982e-10	5.77882e-08
ENSMUSG00000026655	FAM107B	12211.9	1.03891	0.170171	6.10512	1.02723e-09	6.61736e-08
ENSMUSG00000020396	NEFH	1429.75	1.03839	0.29545	3.5146	0.000440423	0.00423673
ENSMUSG00000072568	FAM84B	1394.44	1.03712	0.328297	3.15909	0.00158264	0.0118702
ENSMUSG00000031328	FLNA	35767.8	1.03692	0.29376	3.52983	0.000415829	0.00404083
ENSMUSG00000021377	DEK	5070.38	1.03507	0.340741	3.03771	0.00238385	0.0160793
ENSMUSG00000046982	TSHZ1	1690.44	1.03455	0.13213	7.82979	4.88688e-15	1.02505e-12
ENSMUSG00000022048	DPYSL2	1594.97	1.0329	0.203973	5.06389	4.10796e-07	1.25948e-05
ENSMUSG00000047141	ZFP654	1298.56	1.03289	0.230226	4.48643	7.24267e-06	0.000146558
ENSMUSG00000092192	DYX1C1	63.6539	1.03269	0.353338	2.92266	0.00347058	0.0215222
ENSMUSG00000035473	GALM	472.962	1.03247	0.280517	3.6806	0.000232689	0.00254921
ENSMUSG00000042473	TBC1D8B	432.66	1.03193	0.260659	3.95892	7.52895e-05	0.00101647
ENSMUSG00000040717	IL17RD	136.174	1.02965	0.364478	2.825	0.00472805	0.0273998
ENSMUSG00000030704	RAB6A	2438.55	1.0281	0.146493	7.01808	2.24933e-12	2.63187e-10
ENSMUSG00000039176	POLG	1895.1	1.02723	0.279909	3.66989	0.000242652	0.00263319
ENSMUSG00000022462	SLC38A2	9483.13	1.02527	0.194566	5.26949	1.36804e-07	4.72496e-06
ENSMUSG00000017707	SERINC3	28970.1	1.02518	0.18001	5.69515	1.23263e-08	5.90566e-07
ENSMUSG00000047881	RELL1	470.573	1.02501	0.183151	5.59652	2.18697e-08	9.66988e-07
ENSMUSG00000032000	BIRC3	1082.71	1.02479	0.176354	5.81098	6.21083e-09	3.18884e-07
ENSMUSG00000041238	RBBP8	1157.5	1.0238	0.294257	3.47927	0.000502775	0.00471523
ENSMUSG00000044433	CAMSAP3	53.4535	1.02306	0.367522	2.78366	0.0053749	0.0301284
ENSMUSG00000024795	KIF20B	902.319	1.02188	0.365936	2.79251	0.00523016	0.0295164
ENSMUSG00000005968	TUFT1	113.449	1.02043	0.288878	3.53239	0.000411817	0.00401314
ENSMUSG00000044641	PARD6B	132.09	1.02029	0.181941	5.60783	2.04882e-08	9.12946e-07
ENSMUSG00000038351	SGSM2	648.507	1.02011	0.181661	5.61546	1.96045e-08	8.81266e-07
ENSMUSG00000032328	TMEM30A	2408.24	1.01881	0.257513	3.95635	7.61033e-05	0.00102584
ENSMUSG00000017929	B4GALT5	528.743	1.01686	0.269554	3.77236	0.000161712	0.00188445
ENSMUSG00000041762	GPR155	90.3075	1.01659	0.339517	2.99421	0.00275153	0.0179402
ENSMUSG00000041773	ENC1	754.43	1.01488	0.365976	2.77309	0.00555274	0.0309485
ENSMUSG00000079293	CLEC7A	56.287	1.01468	0.379122	2.6764	0.00744179	0.0386703
ENSMUSG00000097461	GM26735	269.79	1.01422	0.191099	5.30732	1.11248e-07	3.96162e-06
ENSMUSG00000027534	SNX16	97.9198	1.01206	0.213944	4.7305	2.23966e-06	5.40281e-05
ENSMUSG00000045102	POLN	45.3797	1.01145	0.353081	2.86466	0.00417461	0.0250099
ENSMUSG00000030154	KLRB1F	68.7512	1.01084	0.321113	3.14791	0.0016444	0.0122123
ENSMUSG00000047735	SAMD9L	3043.6	1.01082	0.359884	2.80874	0.00497354	0.0284486
ENSMUSG00000043881	KBTBD7	600.205	1.01041	0.187939	5.37628	7.60418e-08	2.86168e-06
ENSMUSG00000001542	ELL2	122.73	1.01035	0.334543	3.02009	0.00252697	0.01684
ENSMUSG00000039701	USP53	316.729	1.00782	0.232568	4.33345	1.46789e-05	0.000262177
ENSMUSG00000013033	ADGRL1	2730.92	1.00758	0.156881	6.42259	1.33974e-10	1.08696e-08
ENSMUSG00000037661	GPR160	139.555	1.00717	0.28119	3.58181	0.000341222	0.00346459
ENSMUSG00000021196	PFKP	2605.61	1.00561	0.210736	4.77192	1.82481e-06	4.53565e-05
ENSMUSG00000032413	RASA2	1670.81	1.00477	0.236062	4.2564	2.07745e-05	0.000351004
ENSMUSG00000041231	UBLCP1	485.701	1.00475	0.227484	4.41678	1.00184e-05	0.000190404
ENSMUSG00000025870	ARL10	139.442	1.00271	0.2289	4.38055	1.1838e-05	0.000219546
ENSMUSG00000025981	COQ10B	308.216	1.00263	0.218944	4.57939	4.66338e-06	0.000101148
ENSMUSG00000022639	DUBR	125.309	1.00262	0.374648	2.67618	0.00744674	0.038674
ENSMUSG00000037759	PTGER2	52.8399	1.00234	0.318904	3.14308	0.00167179	0.0123571
ENSMUSG00000095105	EDARADD	703.248	1.00138	0.286403	3.4964	0.00047159	0.00447007
ENSMUSG00000039814	XKR5	184.012	0.997056	0.289374	3.44556	0.000569871	0.00522762
ENSMUSG00000027950	CHRNB2	282.07	0.996905	0.227504	4.38193	1.17634e-05	0.000218499
ENSMUSG00000000628	HK2	786.74	0.996471	0.270815	3.67953	0.000233661	0.0025566
ENSMUSG00000030641	DDIAS	257.766	0.994816	0.349173	2.84906	0.00438482	0.0259618
ENSMUSG00000028268	GBP3	1067.01	0.993296	0.285607	3.47783	0.000505483	0.00473288
ENSMUSG00000037242	CLIC4	4369	0.986521	0.120641	8.17736	2.90135e-16	7.5611e-14
ENSMUSG00000090236	CAR15	62.0538	0.984906	0.278919	3.53116	0.000413748	0.00402287
ENSMUSG00000021886	GPR65	2214.14	0.983692	0.179668	5.47505	4.37379e-08	1.75359e-06
ENSMUSG00000035376	HACD2	545.215	0.983632	0.12966	7.58625	3.29291e-14	5.7794e-12
ENSMUSG00000087213	2810408I11RIK	70.0942	0.98164	0.335424	2.92656	0.00342732	0.0213123
ENSMUSG00000000290	ITGB2	8922.93	0.980944	0.326819	3.00149	0.00268661	0.0176373
ENSMUSG00000026049	TEX30	998.007	0.979294	0.250163	3.91462	9.05461e-05	0.00117097
ENSMUSG00000024399	LTB	4542.23	0.978423	0.303292	3.22601	0.00125527	0.00983627
ENSMUSG00000035109	SHC4	210.704	0.978023	0.300359	3.25618	0.00112922	0.00910147
ENSMUSG00000014496	ANKRD28	3344.81	0.977839	0.190539	5.13197	2.86733e-07	9.16692e-06
ENSMUSG00000101249	GM29216	49519.1	0.974911	0.151919	6.41732	1.38697e-10	1.11767e-08
ENSMUSG00000033578	TMEM35A	127.768	0.97344	0.315993	3.08057	0.00206605	0.0145461
ENSMUSG00000044348	SLC25A53	555.966	0.971202	0.223867	4.33831	1.43585e-05	0.000256989
ENSMUSG00000024290	ROCK1	4152.83	0.970725	0.257438	3.77071	0.000162786	0.0018944
ENSMUSG00000027699	ECT2	1615.59	0.970332	0.353087	2.74814	0.00599345	0.0329142
ENSMUSG00000035310	LIN54	836.564	0.970283	0.232252	4.17772	2.94445e-05	0.000464235
ENSMUSG00000020397	MED7	757.773	0.969421	0.145228	6.67518	2.46931e-11	2.39956e-09
ENSMUSG00000030259	RASSF8	100.907	0.967389	0.300932	3.21465	0.00130606	0.0101144
ENSMUSG00000064360	MT-ND3	12092.8	0.966944	0.372245	2.5976	0.00938775	0.045898
ENSMUSG00000022876	SAMSN1	2069.77	0.966655	0.23587	4.09825	4.16279e-05	0.000620989
ENSMUSG00000097769	SNHG4	478.226	0.963742	0.25273	3.81333	0.000137106	0.0016468
ENSMUSG00000060002	CHPT1	280.252	0.963397	0.239381	4.02453	5.70892e-05	0.000805524
ENSMUSG00000054150	SYNE3	1968.12	0.961456	0.163282	5.88832	3.90151e-09	2.16408e-07
ENSMUSG00000040929	RFX3	492.563	0.960311	0.307322	3.12477	0.00177943	0.0129852
ENSMUSG00000028458	TESK1	1908.81	0.960289	0.20861	4.60327	4.15902e-06	9.26621e-05
ENSMUSG00000021908	GM6768	206.232	0.957461	0.305723	3.13179	0.00173745	0.0127389
ENSMUSG00000020029	NUDT4	1798.16	0.956606	0.207731	4.60502	4.12433e-06	9.20083e-05
ENSMUSG00000027347	RASGRP1	23240.5	0.956432	0.201248	4.75251	2.00908e-06	4.92956e-05
ENSMUSG00000004508	GAB2	556.484	0.955935	0.258722	3.69483	0.000220032	0.00243536
ENSMUSG00000048007	TIMM8A1	428.654	0.95593	0.338774	2.82173	0.0047765	0.0276318
ENSMUSG00000030107	USP18	1503.28	0.9553	0.362567	2.63482	0.00841815	0.0423122
ENSMUSG00000025597	KLHL4	574.23	0.954987	0.311113	3.06958	0.00214362	0.0149393
ENSMUSG00000022686	B3GNT5	718.654	0.954649	0.274779	3.47424	0.000512309	0.00478638
ENSMUSG00000059588	CALCRL	1761.72	0.954534	0.207265	4.60538	4.11714e-06	9.19674e-05
ENSMUSG00000071748	GM14698	786.96	0.953134	0.307346	3.10117	0.00192754	0.0138081
ENSMUSG00000034998	FOXN2	1788.21	0.95247	0.190241	5.00664	5.53882e-07	1.61197e-05
ENSMUSG00000055493	EPM2A	91.5999	0.952143	0.368304	2.58521	0.009732	0.0471124
ENSMUSG00000071847	APCDD1	244.908	0.949862	0.212525	4.46942	7.84327e-06	0.000156865
ENSMUSG00000020962	GTF2A1	1220.26	0.949364	0.238537	3.97995	6.89289e-05	0.000945436
ENSMUSG00000027115	KIF18A	527.887	0.949002	0.357692	2.65313	0.00797498	0.040667
ENSMUSG00000036863	SYDE2	558.902	0.948828	0.188864	5.02387	5.06413e-07	1.49405e-05
ENSMUSG00000044024	RELL2	188.453	0.947974	0.32649	2.90353	0.00368981	0.0226175
ENSMUSG00000106317	GM43848	53.3475	0.947353	0.3335	2.84064	0.00450236	0.0264754
ENSMUSG00000027087	ITGAV	1188.99	0.945767	0.248455	3.80659	0.000140895	0.00168174
ENSMUSG00000034833	TESPA1	3837.48	0.944891	0.177698	5.3174	1.05262e-07	3.80359e-06
ENSMUSG00000022421	NPTXR	68.2894	0.943533	0.327382	2.88205	0.00395095	0.0238779
ENSMUSG00000021775	NR1D2	853.91	0.942358	0.33241	2.83492	0.00458364	0.0268282
ENSMUSG00000034799	UNC13A	73.2316	0.941572	0.312003	3.01783	0.00254594	0.0169335
ENSMUSG00000048895	CDK5R1	89.128	0.941222	0.301344	3.12341	0.00178767	0.0130178
ENSMUSG00000086429	GT(ROSA)26SOR	282.522	0.939682	0.29338	3.20295	0.00136029	0.0104544
ENSMUSG00000054484	TMEM62	270.352	0.938882	0.197899	4.74426	2.09267e-06	5.11278e-05
ENSMUSG00000040328	OLFR56	78.492	0.935424	0.351742	2.6594	0.00782788	0.0400594
ENSMUSG00000021552	GKAP1	58.1105	0.934571	0.29694	3.14734	0.00164766	0.0122297
ENSMUSG00000027002	NCKAP1	407.405	0.934129	0.264427	3.53265	0.00041141	0.00401148
ENSMUSG00000032946	RASGRP2	5118.98	0.932789	0.209229	4.45821	8.26455e-06	0.000163767
ENSMUSG00000004768	RAB23	91.3483	0.932147	0.230295	4.04763	5.17393e-05	0.000747201
ENSMUSG00000046675	TMEM251	918.754	0.931884	0.162399	5.73825	9.56623e-09	4.63491e-07
ENSMUSG00000086370	FTX	195.024	0.930641	0.334734	2.78024	0.00543191	0.0303982
ENSMUSG00000037020	WDR62	737.742	0.928885	0.280272	3.31423	0.000918967	0.00777483
ENSMUSG00000039910	CITED2	1068.1	0.927637	0.176284	5.26218	1.42359e-07	4.89713e-06
ENSMUSG00000022892	APP	80.7331	0.926769	0.281576	3.29136	0.000997043	0.00828461
ENSMUSG00000046269	USP27X	85.6267	0.926411	0.241554	3.83522	0.000125451	0.00153142
ENSMUSG00000020828	PLD2	71.3654	0.926387	0.302406	3.06339	0.00218848	0.0151294
ENSMUSG00000058927	GM10053	2527.96	0.925372	0.20595	4.49319	7.01654e-06	0.000143161
ENSMUSG00000028068	IQGAP3	1008.98	0.924631	0.336287	2.74953	0.00596815	0.0328483
ENSMUSG00000032012	NECTIN1	101.883	0.922888	0.335877	2.7477	0.00600155	0.0329482
ENSMUSG00000018796	ACSL1	342.257	0.922039	0.24749	3.72556	0.000194882	0.0022009
ENSMUSG00000023087	NOCT	934.007	0.921026	0.156864	5.87148	4.31909e-09	2.3509e-07
ENSMUSG00000070709	ZFP974	153.992	0.920776	0.286006	3.21943	0.00128445	0.0100012
ENSMUSG00000020189	OSBPL8	4382.41	0.919623	0.253088	3.63361	0.000279482	0.00296185
ENSMUSG00000097347	GM17275	138.255	0.919167	0.304512	3.01849	0.00254038	0.0169162
ENSMUSG00000031398	PLXNA3	467.92	0.916161	0.231726	3.95364	7.69718e-05	0.0010335
ENSMUSG00000078185	CHML	446.54	0.915856	0.331081	2.76626	0.00567032	0.0314815
ENSMUSG00000023150	IVNS1ABP	9996.27	0.915352	0.253292	3.61383	0.000301709	0.00316813
ENSMUSG00000011831	EVI5	276.017	0.913915	0.256633	3.56118	0.000369196	0.00368041
ENSMUSG00000050846	ZFP623	491.458	0.911174	0.124576	7.31418	2.5895e-13	3.87299e-11
ENSMUSG00000022995	ENAH	31.2983	0.910521	0.330104	2.75829	0.00581051	0.0321287
ENSMUSG00000020021	FGD6	264.219	0.910181	0.218131	4.17263	3.01109e-05	0.000471682
ENSMUSG00000048027	RGMB	60.424	0.909803	0.34528	2.63497	0.0084144	0.0423056
ENSMUSG00000074743	THBD	118.406	0.909487	0.339545	2.67854	0.00739432	0.0384818
ENSMUSG00000022309	ANGPT1	1739.33	0.909334	0.349918	2.59871	0.00935758	0.0458026
ENSMUSG00000031563	WWC2	362.926	0.909304	0.171165	5.31245	1.08162e-07	3.89201e-06
ENSMUSG00000048100	TAF13	520.193	0.909162	0.19461	4.67171	2.98709e-06	7.01163e-05
ENSMUSG00000024789	JAK2	3219.99	0.905102	0.218438	4.14352	3.4201e-05	0.000526169
ENSMUSG00000041658	RRAGB	428.818	0.904465	0.142278	6.35704	2.05675e-10	1.56532e-08
ENSMUSG00000103400	GM15853	30.8704	0.904226	0.329201	2.74673	0.00601927	0.0330172
ENSMUSG00000025757	HSPA4L	2450.5	0.9037	0.208397	4.33644	1.44808e-05	0.000258909
ENSMUSG00000020290	XPO1	5721.91	0.903479	0.290839	3.10645	0.00189345	0.0136095
ENSMUSG00000036499	EEA1	401.448	0.903186	0.280065	3.22492	0.00126009	0.00985611
ENSMUSG00000026158	OGFRL1	991.12	0.902027	0.187254	4.81713	1.45637e-06	3.73874e-05
ENSMUSG00000068798	RAP1A	4835.36	0.898981	0.203466	4.41832	9.94688e-06	0.000189885
ENSMUSG00000044408	SPTSSA	1910.81	0.898537	0.24699	3.63795	0.000274812	0.00291956
ENSMUSG00000008384	SERTAD1	627.047	0.897947	0.242847	3.69757	0.000217669	0.00241387
ENSMUSG00000110156	GM45248	71.016	0.897931	0.295992	3.03363	0.00241628	0.0162471
ENSMUSG00000090115	USP49	987.521	0.897149	0.178937	5.01376	5.33759e-07	1.55868e-05
ENSMUSG00000033610	PANK1	189.465	0.89644	0.249574	3.59188	0.000328302	0.00336519
ENSMUSG00000051499	ZFP786	92.0612	0.896431	0.226956	3.9498	7.82158e-05	0.00104694
ENSMUSG00000024659	ANXA1	90.9448	0.894835	0.334729	2.67331	0.00751064	0.0389269
ENSMUSG00000040268	PLEKHA1	594.071	0.894276	0.195977	4.56316	5.03882e-06	0.000107796
ENSMUSG00000020653	KLF11	443.181	0.893593	0.341129	2.61952	0.00880541	0.0437341
ENSMUSG00000047368	ABHD17B	631.083	0.893247	0.212807	4.19745	2.69942e-05	0.000437194
ENSMUSG00000097195	SNHG5	1096.85	0.892233	0.214138	4.16662	3.0915e-05	0.000482084
ENSMUSG00000008393	CARHSP1	1326.55	0.891656	0.309527	2.88071	0.00396783	0.023963
ENSMUSG00000056145	AI504432	4431.75	0.890089	0.308164	2.88836	0.00387253	0.0234864
ENSMUSG00000049439	CYP20A1	227.676	0.889317	0.293044	3.03475	0.00240735	0.0161997
ENSMUSG00000040918	SLC19A2	159.471	0.889296	0.216415	4.10921	3.97012e-05	0.000597952
ENSMUSG00000023044	CSAD	659.059	0.888433	0.148185	5.99544	2.02939e-09	1.212e-07
ENSMUSG00000021371	MCUR1	1316.7	0.888394	0.187128	4.74751	2.05934e-06	5.0385e-05
ENSMUSG00000026819	SLC25A25	890.228	0.887842	0.139686	6.35598	2.071e-10	1.56921e-08
ENSMUSG00000025193	CUTC	393.057	0.887836	0.170638	5.20303	1.96061e-07	6.47265e-06
ENSMUSG00000107201	5930420M18RIK	40.1146	0.887108	0.343671	2.58127	0.00984383	0.0475601
ENSMUSG00000060550	H2-Q7	17388.5	0.88667	0.244727	3.6231	0.000291094	0.00306415
ENSMUSG00000022508	BCL6	564.551	0.88654	0.278084	3.18803	0.00143244	0.0109196
ENSMUSG00000022263	TRIO	477.099	0.886208	0.261973	3.38282	0.000717465	0.00631223
ENSMUSG00000054364	RHOB	85.5694	0.886073	0.341344	2.59584	0.00943608	0.0460819
ENSMUSG00000038594	CEP85L	114.329	0.883598	0.273371	3.23223	0.0012283	0.00969115
ENSMUSG00000017615	TNFAIP1	895.909	0.883327	0.127444	6.9311	4.17592e-12	4.6945e-10
ENSMUSG00000057069	ERO1LB	526.62	0.883304	0.22476	3.92999	8.49496e-05	0.00111793
ENSMUSG00000074785	PLXNC1	304.092	0.883116	0.309133	2.85675	0.00428008	0.0255173
ENSMUSG00000066232	IPO7	5530.19	0.882344	0.287709	3.0668	0.00216366	0.0150485
ENSMUSG00000035329	FBXO33	975.493	0.881216	0.195936	4.49748	6.87645e-06	0.000140971
ENSMUSG00000028645	SLC2A1	918.277	0.880319	0.150224	5.86003	4.62777e-09	2.51097e-07
ENSMUSG00000044150	A830080D01RIK	432.021	0.87974	0.282034	3.11927	0.00181302	0.0131467
ENSMUSG00000089417	GM22009	60.3322	0.879658	0.311279	2.82595	0.00471407	0.0273741
ENSMUSG00000099632	2900093K20RIK	68.3663	0.877736	0.270933	3.23968	0.00119665	0.00952962
ENSMUSG00000000838	FMR1	1700.15	0.877412	0.2969	2.95524	0.00312423	0.0198144
ENSMUSG00000030729	PGM2L1	1247.15	0.875074	0.213316	4.10224	4.09167e-05	0.000611971
ENSMUSG00000046410	KCNK6	46.1914	0.874674	0.323774	2.70149	0.00690288	0.0365033
ENSMUSG00000034993	VAT1	4878.66	0.874492	0.176093	4.96609	6.83173e-07	1.93904e-05
ENSMUSG00000053716	DUSP7	1175.96	0.874389	0.150057	5.82704	5.64201e-09	2.9318e-07
ENSMUSG00000095595	FAM177A	858.272	0.87329	0.172712	5.05633	4.27393e-07	1.30729e-05
ENSMUSG00000020231	DIP2A	195.734	0.872537	0.287208	3.038	0.00238155	0.0160701
ENSMUSG00000026643	NMT2	1095.94	0.871129	0.193762	4.49587	6.92876e-06	0.000141875
ENSMUSG00000034156	TSPOAP1	225.258	0.87102	0.339031	2.56915	0.0101949	0.0488582
ENSMUSG00000061244	EXOC5	1929.15	0.870322	0.251545	3.45991	0.000540355	0.00498878
ENSMUSG00000023828	SLC22A3	2737.52	0.869932	0.274672	3.16716	0.00153934	0.0115973
ENSMUSG00000034171	FAAH	1637.86	0.869581	0.222418	3.90966	9.24259e-05	0.00119081
ENSMUSG00000037573	TOB1	343.713	0.867708	0.22438	3.86714	0.000110119	0.00137749
ENSMUSG00000035840	LYSMD3	840.35	0.866835	0.272273	3.1837	0.00145404	0.0110417
ENSMUSG00000035299	MID1	318.832	0.866488	0.306526	2.8268	0.00470161	0.0273109
ENSMUSG00000019878	HSF2	479.817	0.865286	0.216087	4.00434	6.2191e-05	0.00086825
ENSMUSG00000050050	CCDC158	38.3316	0.865143	0.324635	2.66497	0.00769947	0.0396262
ENSMUSG00000028460	SIT1	908.774	0.864766	0.221997	3.8954	9.80388e-05	0.0012528
ENSMUSG00000037434	SLC30A1	430.083	0.864134	0.25846	3.34339	0.000827604	0.00709611
ENSMUSG00000042460	C1GALT1	3491.42	0.862859	0.278367	3.09972	0.00193705	0.013836
ENSMUSG00000066175	2510046G10RIK	139.157	0.861988	0.266975	3.22872	0.00124344	0.00979372
ENSMUSG00000038323	1700066M21RIK	242.852	0.861427	0.281676	3.05822	0.00222657	0.0153177
ENSMUSG00000015597	ZFP318	991.93	0.861414	0.244842	3.51825	0.000434403	0.00419525
ENSMUSG00000076617	IGHM	9858.42	0.861347	0.169673	5.07652	3.84416e-07	1.1892e-05
ENSMUSG00000031644	NEK1	747.038	0.86114	0.239561	3.59465	0.000324822	0.00334547
ENSMUSG00000047604	FRAT2	2298.83	0.859862	0.133214	6.45476	1.08387e-10	9.18357e-09
ENSMUSG00000070056	MFHAS1	640.92	0.859733	0.270016	3.18401	0.00145249	0.0110348
ENSMUSG00000014243	ZSWIM7	155.162	0.858771	0.221848	3.87099	0.000108396	0.00136088
ENSMUSG00000037949	ANO10	1067.95	0.858406	0.261476	3.28292	0.00102738	0.00848337
ENSMUSG00000031197	VBP1	1549.28	0.856108	0.257407	3.3259	0.00088135	0.00749344
ENSMUSG00000027195	HSD17B12	2849.52	0.855195	0.113234	7.55248	4.27044e-14	7.34516e-12
ENSMUSG00000079003	SAMD1	1730.03	0.854443	0.203911	4.19027	2.78627e-05	0.000445804
ENSMUSG00000074738	FNDC10	558.592	0.854328	0.237625	3.59527	0.000324052	0.00334154
ENSMUSG00000047371	ZFP768	284.529	0.854243	0.286219	2.98458	0.00283971	0.0183828
ENSMUSG00000100862	GM10925	172393	0.853785	0.332492	2.56784	0.0102336	0.0490026
ENSMUSG00000029836	CBX3	7181.52	0.852475	0.277898	3.06758	0.00215796	0.0150149
ENSMUSG00000035992	FNIP1	909.223	0.848518	0.184462	4.59997	4.22561e-06	9.37813e-05
ENSMUSG00000026064	PTP4A1	2572.85	0.847927	0.221864	3.82183	0.000132464	0.00159887
ENSMUSG00000028266	LMO4	1913.99	0.847587	0.178799	4.74044	2.13257e-06	5.18814e-05
ENSMUSG00000001630	STK38L	309.384	0.846826	0.15195	5.57305	2.50315e-08	1.07609e-06
ENSMUSG00000086350	B230369F24RIK	68.2202	0.845974	0.240213	3.52177	0.000428675	0.00414458
ENSMUSG00000038080	KDM1B	1421.91	0.844905	0.126903	6.65787	2.77819e-11	2.64005e-09
ENSMUSG00000001175	CALM1	13298.8	0.843928	0.169869	4.96811	6.76073e-07	1.92843e-05
ENSMUSG00000094483	PURB	7856.88	0.843879	0.246817	3.41904	0.000628416	0.00563382
ENSMUSG00000022905	KPNA1	2768.71	0.843124	0.171021	4.92995	8.22516e-07	2.27083e-05
ENSMUSG00000073478	D730003I15RIK	38.9387	0.842941	0.298794	2.82115	0.00478525	0.0276567
ENSMUSG00000021285	PPP1R13B	3428.36	0.842221	0.182738	4.60889	4.04817e-06	9.05442e-05
ENSMUSG00000032932	HSPA13	1098.57	0.840673	0.24281	3.46227	0.000535632	0.00496239
ENSMUSG00000023495	PCBP4	279.392	0.840507	0.327453	2.56681	0.010264	0.049121
ENSMUSG00000023755	RHEBL1	230.486	0.840048	0.14637	5.73921	9.51194e-09	4.62162e-07
ENSMUSG00000108435	GM45051	215.235	0.839085	0.216406	3.87737	0.000105593	0.00133073
ENSMUSG00000062861	ZFP28	201.8	0.836857	0.252023	3.32056	0.000898384	0.00762319
ENSMUSG00000025171	UBTD1	455.073	0.836528	0.224215	3.73091	0.000190789	0.00216732
ENSMUSG00000054426	A930005H10RIK	709.707	0.836438	0.299148	2.79607	0.00517281	0.0292816
ENSMUSG00000024293	ESCO1	1575.72	0.835748	0.304711	2.74276	0.00609252	0.0333094
ENSMUSG00000039168	DAP	2901.07	0.834991	0.244256	3.41851	0.000629649	0.0056406
ENSMUSG00000006720	ZFP184	225.024	0.830585	0.290183	2.86227	0.00420613	0.0251811
ENSMUSG00000025486	SIRT3	655.124	0.829682	0.21485	3.86168	0.000112611	0.00140152
ENSMUSG00000037640	ZFP60	828.656	0.829607	0.208438	3.98011	6.88833e-05	0.000945436
ENSMUSG00000053819	CAMK2D	2309.07	0.828015	0.195204	4.2418	2.21735e-05	0.000371358
ENSMUSG00000003154	FOXJ2	1405.23	0.827752	0.205057	4.03669	5.42098e-05	0.000773783
ENSMUSG00000030522	MTMR10	312.632	0.826944	0.182216	4.53826	5.6719e-06	0.000118971
ENSMUSG00000034297	MED13	5695.8	0.82666	0.264353	3.12711	0.00176534	0.0129043
ENSMUSG00000037697	DDHD1	899.601	0.826646	0.139245	5.93661	2.90981e-09	1.66829e-07
ENSMUSG00000059495	ARHGEF12	135.464	0.826553	0.2898	2.85215	0.00434249	0.0257555
ENSMUSG00000025626	PHF6	4227.59	0.826549	0.223485	3.69845	0.000216917	0.00240902
ENSMUSG00000063317	USP31	811.739	0.825333	0.260225	3.17161	0.00151596	0.0114462
ENSMUSG00000021123	RDH12	221.446	0.825149	0.255967	3.22365	0.00126566	0.00988416
ENSMUSG00000051495	IRF2BP2	3286.72	0.824869	0.147772	5.58203	2.37728e-08	1.03256e-06
ENSMUSG00000000811	TXNRD3	392.377	0.820877	0.301898	2.71905	0.00654697	0.0351526
ENSMUSG00000024072	YIPF4	942.959	0.820829	0.250575	3.27578	0.00105369	0.00863024
ENSMUSG00000048249	CREBRF	1357.76	0.818903	0.248462	3.29588	0.000981137	0.00818407
ENSMUSG00000046567	4930430F08RIK	278.625	0.817739	0.189125	4.3238	1.53364e-05	0.000271385
ENSMUSG00000037075	RNF139	1534.34	0.817566	0.2051	3.98618	6.7145e-05	0.000925395
ENSMUSG00000049686	ORAI1	1178.14	0.816631	0.224415	3.63894	0.000273765	0.00291203
ENSMUSG00000068959	ZFP619	85.6691	0.81606	0.314337	2.59613	0.00942805	0.0460558
ENSMUSG00000021549	RASA1	2741.66	0.81542	0.221994	3.67317	0.000239565	0.00260973
ENSMUSG00000071072	PTGES3	4912.03	0.815002	0.240564	3.38788	0.000704347	0.00620634
ENSMUSG00000038910	PLCL2	2217.39	0.814335	0.16477	4.94225	7.7228e-07	2.15987e-05
ENSMUSG00000097656	GM26712	99.6276	0.812451	0.209934	3.87004	0.00010882	0.00136322
ENSMUSG00000034111	TMED8	994.419	0.811769	0.198088	4.09803	4.16678e-05	0.000621045
ENSMUSG00000003198	ZFP959	286.733	0.811679	0.282161	2.87665	0.0040192	0.0242137
ENSMUSG00000023892	ZFP51	727.763	0.811628	0.30273	2.68103	0.00733954	0.038301
ENSMUSG00000015342	XK	382.906	0.81157	0.271164	2.99291	0.00276329	0.0180032
ENSMUSG00000029426	SCARB2	4126.25	0.811304	0.164902	4.9199	8.65864e-07	2.3677e-05
ENSMUSG00000044098	RSBN1	1858.05	0.809429	0.222075	3.64484	0.000267557	0.00285985
ENSMUSG00000022698	NAA50	4342.83	0.808481	0.30599	2.64218	0.00823741	0.0416349
ENSMUSG00000074305	PEAK1	2330.8	0.8066	0.213563	3.77687	0.00015881	0.0018596
ENSMUSG00000021831	ERO1L	1434.87	0.806478	0.220385	3.65941	0.000252798	0.0027245
ENSMUSG00000043439	EPOP	404.774	0.804782	0.253317	3.17698	0.00148817	0.0112611
ENSMUSG00000033014	TRIM33	3377.43	0.804198	0.204831	3.92616	8.63122e-05	0.00112895
ENSMUSG00000003382	ETV3	4369.86	0.803524	0.205102	3.91767	8.94082e-05	0.00115923
ENSMUSG00000037722	GNPNAT1	738.591	0.803116	0.165145	4.86311	1.15555e-06	3.04371e-05
ENSMUSG00000025986	SLC39A10	1439.87	0.799667	0.21803	3.66769	0.000244747	0.00265426
ENSMUSG00000038007	ACER2	60.5528	0.799347	0.28142	2.84041	0.00450554	0.026485
ENSMUSG00000054027	NT5DC3	1007.98	0.799106	0.136399	5.85859	4.668e-09	2.51374e-07
ENSMUSG00000059540	TCEA2	115.452	0.798022	0.229287	3.48045	0.000500576	0.00470487
ENSMUSG00000039512	UHRF1BP1	828.421	0.792239	0.184161	4.30189	1.69351e-05	0.00029494
ENSMUSG00000055210	FOXD2	111.13	0.791956	0.273087	2.90001	0.00373147	0.0227916
ENSMUSG00000048490	NRIP1	7304	0.791123	0.176038	4.49405	6.98811e-06	0.00014275
ENSMUSG00000053641	DENND4A	2048.21	0.791028	0.225537	3.50731	0.000452653	0.00432776
ENSMUSG00000023915	TNFRSF21	1010.41	0.790567	0.2584	3.05947	0.00221727	0.015262
ENSMUSG00000026708	CENPL	863.19	0.790293	0.221889	3.56166	0.000368517	0.00367875
ENSMUSG00000002297	DBF4	1323.06	0.789588	0.279055	2.8295	0.00466207	0.0271087
ENSMUSG00000039585	MYO9A	739.661	0.789519	0.251309	3.14162	0.00168017	0.0124029
ENSMUSG00000089945	PAKAP	707.747	0.789335	0.277757	2.84182	0.00448573	0.0263957
ENSMUSG00000039530	TUSC3	1390.06	0.789306	0.170008	4.64276	3.43793e-06	7.91599e-05
ENSMUSG00000006373	PGRMC1	2414.41	0.78763	0.154367	5.10233	3.35496e-07	1.04919e-05
ENSMUSG00000044813	SHB	107.65	0.787595	0.183532	4.29132	1.77617e-05	0.000306728
ENSMUSG00000039942	PTGER4	2891.05	0.787338	0.158175	4.97765	6.43611e-07	1.8481e-05
ENSMUSG00000030157	CLEC2D	4187.55	0.786836	0.19107	4.11805	3.82086e-05	0.00057953
ENSMUSG00000031885	CBFB	6909.09	0.786344	0.156319	5.03038	4.89501e-07	1.45162e-05
ENSMUSG00000031007	ATP6AP2	2397.15	0.786206	0.185231	4.24447	2.19109e-05	0.000367676
ENSMUSG00000044340	PHLPP1	718.523	0.785749	0.163644	4.80157	1.57425e-06	4.01142e-05
ENSMUSG00000020647	NCOA1	1168.51	0.785359	0.2106	3.72916	0.000192121	0.00217687
ENSMUSG00000039086	SS18L1	282.163	0.7833	0.202838	3.86171	0.000112597	0.00140152
ENSMUSG00000024187	FAM234A	681.293	0.782403	0.23539	3.32386	0.000887816	0.00754096
ENSMUSG00000063253	SCOC	453.081	0.781847	0.255123	3.06459	0.00217967	0.0150928
ENSMUSG00000043372	HEXIM2	292.231	0.781228	0.239726	3.25884	0.0011187	0.00904558
ENSMUSG00000035868	ZFP983	131.993	0.779241	0.293403	2.65587	0.00791039	0.0404095
ENSMUSG00000040710	ST8SIA4	2676.31	0.778251	0.296885	2.62139	0.00875713	0.0435577
ENSMUSG00000041219	ARHGAP11A	1710.99	0.77794	0.289456	2.68759	0.00719697	0.0377345
ENSMUSG00000051098	MBLAC2	373.703	0.775931	0.193485	4.0103	6.06427e-05	0.000847322
ENSMUSG00000014786	SLC9A5	128.732	0.775599	0.241105	3.21685	0.00129607	0.0100573
ENSMUSG00000071266	ZFP946	176.238	0.775431	0.292845	2.64792	0.0080988	0.0411034
ENSMUSG00000018199	TROVE2	317.29	0.771215	0.269673	2.85982	0.00423884	0.0253417
ENSMUSG00000083012	FAM220A	584.644	0.771142	0.18345	4.20355	2.62759e-05	0.00042717
ENSMUSG00000037533	RAPGEF6	4470.7	0.770386	0.191898	4.01456	5.95559e-05	0.00083417
ENSMUSG00000003882	IL7R	5378.02	0.770063	0.231069	3.33261	0.000860364	0.0073295
ENSMUSG00000029392	RILPL1	253.494	0.76847	0.201877	3.80662	0.000140878	0.00168174
ENSMUSG00000071076	JUND	4348.48	0.767538	0.205803	3.72947	0.00019188	0.00217557
ENSMUSG00000007837	PRRG2	111.28	0.767514	0.256107	2.99685	0.00272784	0.0178196
ENSMUSG00000085436	ZFP335OS	190.211	0.767295	0.18699	4.1034	4.07124e-05	0.000609977
ENSMUSG00000042138	MSANTD2	385.436	0.76672	0.162713	4.71209	2.45185e-06	5.88079e-05
ENSMUSG00000021929	KPNA3	2970.94	0.766641	0.269427	2.84545	0.00443488	0.0261501
ENSMUSG00000031878	NAE1	913.639	0.765733	0.222063	3.44828	0.000564174	0.00518088
ENSMUSG00000005483	DNAJB1	4444.05	0.76436	0.142322	5.37065	7.84516e-08	2.93341e-06
ENSMUSG00000034066	FARP2	139.379	0.764174	0.233932	3.26664	0.0010883	0.00885051
ENSMUSG00000052783	GRK4	81.4172	0.763963	0.272826	2.80018	0.00510739	0.0289829
ENSMUSG00000028124	GCLM	728.48	0.762819	0.138442	5.51004	3.58744e-08	1.47617e-06
ENSMUSG00000031605	KLHL2	525.207	0.762696	0.130486	5.84506	5.0639e-09	2.67997e-07
ENSMUSG00000054843	ATRNL1	247.606	0.762587	0.265565	2.87157	0.00408445	0.0245541
ENSMUSG00000032479	MAP4	4383.83	0.761411	0.197138	3.86233	0.00011231	0.00140152
ENSMUSG00000014453	BLK	1805.11	0.761163	0.278135	2.73667	0.00620651	0.0337716
ENSMUSG00000064341	MT-ND1	93508.9	0.76112	0.270704	2.81163	0.00492909	0.0282507
ENSMUSG00000035967	INTS6L	822.444	0.761061	0.248986	3.05664	0.0022383	0.015381
ENSMUSG00000027882	STXBP3	663.784	0.759646	0.193248	3.93094	8.46161e-05	0.00111525
ENSMUSG00000098702	1500015A07RIK	230.292	0.758725	0.151045	5.02316	5.08286e-07	1.49701e-05
ENSMUSG00000034574	DAAM1	258.569	0.7582	0.229004	3.31086	0.000930089	0.00783041
ENSMUSG00000022568	SCRIB	3160.11	0.75773	0.184346	4.11036	3.95038e-05	0.000595597
ENSMUSG00000016528	MAPKAPK2	6041.56	0.757345	0.185304	4.08703	4.36928e-05	0.000645801
ENSMUSG00000004748	MTFP1	166.367	0.756895	0.237551	3.18624	0.00144137	0.0109648
ENSMUSG00000061313	DDHD2	585.329	0.755968	0.2105	3.59129	0.000329043	0.00337078
ENSMUSG00000054079	UTP18	1868.71	0.75499	0.170509	4.42786	9.51719e-06	0.00018331
ENSMUSG00000058748	ZFP958	384.009	0.754817	0.277247	2.72254	0.00647814	0.0348636
ENSMUSG00000040734	PPP1R13L	204.891	0.754741	0.266889	2.82792	0.00468509	0.0272242
ENSMUSG00000016984	ETAA1	789.377	0.754527	0.271705	2.77701	0.00548617	0.0306669
ENSMUSG00000079418	ATG4A	620.914	0.75232	0.192159	3.9151	9.03671e-05	0.00116954
ENSMUSG00000012519	MLKL	185.351	0.751854	0.253751	2.96296	0.00304699	0.0194176
ENSMUSG00000028261	NDUFAF4	827.651	0.751662	0.244431	3.07515	0.002104	0.0146989
ENSMUSG00000094870	ZFP131	1478.27	0.751122	0.219478	3.42231	0.000620918	0.00558566
ENSMUSG00000042742	BMT2	622.938	0.750825	0.218349	3.43865	0.000584625	0.00533168
ENSMUSG00000026556	VANGL2	1050.97	0.750754	0.228721	3.2824	0.00102929	0.00849103
ENSMUSG00000073236	2500004C02RIK	124.012	0.75065	0.194864	3.85217	0.000117074	0.00144973
ENSMUSG00000042364	SNX18	1124.45	0.750495	0.114598	6.54893	5.79507e-11	5.17382e-09
ENSMUSG00000101970	1810026B05RIK	967.564	0.750293	0.209898	3.57456	0.000350824	0.00354034
ENSMUSG00000067768	XLR4B	977.986	0.749169	0.198531	3.77357	0.000160931	0.00187662
ENSMUSG00000037458	AZIN1	4172.12	0.747952	0.231691	3.22824	0.00124557	0.00979437
ENSMUSG00000015217	HMGB3	2278.23	0.747292	0.232239	3.21777	0.00129192	0.0100411
ENSMUSG00000042106	FAM212A	410.67	0.746824	0.162844	4.58613	4.51541e-06	9.84347e-05
ENSMUSG00000051674	DCUN1D4	294.759	0.745335	0.178203	4.1825	2.88317e-05	0.000457055
ENSMUSG00000050107	GSG2	530.933	0.74472	0.256544	2.9029	0.00369727	0.0226491
ENSMUSG00000036779	PAPD5	1884.8	0.744707	0.17824	4.17811	2.93943e-05	0.000464235
ENSMUSG00000069237	FAM8A1	704.914	0.74403	0.229906	3.23623	0.00121119	0.00958699
ENSMUSG00000043415	OTUD1	444.873	0.743992	0.214902	3.46201	0.000536155	0.00496239
ENSMUSG00000050786	CCDC126	264.196	0.743775	0.221175	3.36283	0.000771473	0.00670846
ENSMUSG00000041000	TRIM62	314.272	0.743513	0.193879	3.83493	0.0001256	0.00153214
ENSMUSG00000035725	PRKX	1278.1	0.742657	0.17541	4.23383	2.29741e-05	0.000382902
ENSMUSG00000028719	CMPK1	2744.37	0.742466	0.213908	3.47095	0.000518612	0.00483476
ENSMUSG00000097059	FAM120AOS	198.956	0.742285	0.181887	4.08103	4.48375e-05	0.000659713
ENSMUSG00000026663	ATF6	2094.95	0.742104	0.237861	3.1199	0.0018091	0.0131323
ENSMUSG00000039841	ZFP800	1084.92	0.742064	0.181408	4.09059	4.30276e-05	0.000638546
ENSMUSG00000025544	TM9SF2	4996.72	0.742045	0.179197	4.14094	3.4588e-05	0.000531173
ENSMUSG00000073139	TMEM185A	804.155	0.741406	0.154367	4.80289	1.56391e-06	3.99098e-05
ENSMUSG00000026739	BMI1	1861.38	0.740402	0.213592	3.46643	0.000527413	0.0049008
ENSMUSG00000044447	DOCK5	451.083	0.73964	0.224377	3.29642	0.00097926	0.00817634
ENSMUSG00000031266	GLA	293.604	0.738424	0.149599	4.93602	7.97313e-07	2.21547e-05
ENSMUSG00000024287	THOC1	1325.19	0.738051	0.207296	3.56037	0.00037033	0.0036819
ENSMUSG00000021687	SCAMP1	299.926	0.736779	0.263384	2.79736	0.00515218	0.0291889
ENSMUSG00000031137	FGF13	239.771	0.735766	0.280574	2.62236	0.00873233	0.0434711
ENSMUSG00000060681	SLC9A6	879.698	0.735364	0.131492	5.59247	2.2386e-08	9.87278e-07
ENSMUSG00000039634	ZFP189	377.65	0.734374	0.209083	3.51236	0.000444147	0.0042654
ENSMUSG00000038170	PDE4DIP	1150.45	0.733995	0.135597	5.41306	6.19568e-08	2.39474e-06
ENSMUSG00000036707	CAB39	6816.86	0.733246	0.153493	4.77705	1.77883e-06	4.45356e-05
ENSMUSG00000027086	FASTKD1	613.508	0.73257	0.176611	4.14793	3.35499e-05	0.000518937
ENSMUSG00000058317	UBE2E2	139.314	0.732439	0.229762	3.18782	0.00143352	0.0109196
ENSMUSG00000005951	SHPK	230.841	0.731649	0.183947	3.97749	6.96462e-05	0.000952238
ENSMUSG00000026781	ACBD5	760.395	0.73128	0.22222	3.29079	0.000999052	0.00829329
ENSMUSG00000047879	USP14	1959.73	0.730467	0.220714	3.30956	0.000934412	0.00785143
ENSMUSG00000028995	FAM126A	1135.99	0.730434	0.206201	3.54234	0.000396599	0.003898
ENSMUSG00000040270	BACH2	1264.31	0.730321	0.246838	2.95871	0.00308933	0.0196365
ENSMUSG00000039787	CERCAM	467.771	0.729618	0.190232	3.83541	0.000125354	0.00153142
ENSMUSG00000003746	MAN1A	3010.53	0.729091	0.223311	3.26491	0.00109499	0.00888805
ENSMUSG00000024677	MS4A6B	8795.65	0.728912	0.242125	3.01048	0.00260834	0.0172209
ENSMUSG00000064367	MT-ND5	57190.4	0.72784	0.259624	2.80344	0.00505614	0.0287917
ENSMUSG00000029780	NT5C3	1204.95	0.727642	0.162978	4.46466	8.01956e-06	0.000159649
ENSMUSG00000030515	TARSL2	331.074	0.727565	0.217751	3.34127	0.000833972	0.00713293
ENSMUSG00000033906	ZDHHC15	825.035	0.727532	0.192672	3.77602	0.000159351	0.00186325
ENSMUSG00000040850	PSME4	3177.49	0.726862	0.204094	3.5614	0.000368877	0.00368021
ENSMUSG00000057329	BCL2	7654.25	0.726788	0.261713	2.77704	0.00548565	0.0306669
ENSMUSG00000059791	NRM	1114.53	0.726165	0.25816	2.81285	0.00491048	0.028191
ENSMUSG00000037108	ZCWPW1	1008.46	0.725201	0.207341	3.49762	0.000469429	0.00445841
ENSMUSG00000028035	DNAJB4	323.77	0.725006	0.226458	3.2015	0.00136712	0.0104882
ENSMUSG00000033964	ZBTB41	759.243	0.724965	0.277666	2.61093	0.00902969	0.0445527
ENSMUSG00000018363	SMURF2	1317.1	0.724806	0.26244	2.7618	0.00574831	0.0318425
ENSMUSG00000048047	ZBTB33	1876.83	0.724324	0.236414	3.06379	0.00218552	0.0151168
ENSMUSG00000073147	5031425E22RIK	511.351	0.723477	0.159938	4.52347	6.08345e-06	0.000126219
ENSMUSG00000029787	AVL9	2308.46	0.723465	0.207534	3.48601	0.000490281	0.00462326
ENSMUSG00000039943	PLCB4	324.641	0.722006	0.241588	2.98858	0.00280277	0.0182122
ENSMUSG00000025059	GK	357.776	0.721905	0.211432	3.41436	0.000639311	0.00571228
ENSMUSG00000044636	CSRNP2	469.468	0.72151	0.194595	3.70776	0.000209103	0.00233696
ENSMUSG00000025511	TSPAN4	323.17	0.719979	0.257038	2.80106	0.00509346	0.0289229
ENSMUSG00000015733	CAPZA2	6080.97	0.718649	0.21996	3.26719	0.00108622	0.00883772
ENSMUSG00000034165	CCND3	11443.7	0.718592	0.184726	3.89004	0.000100226	0.0012748
ENSMUSG00000043424	EIF3J2	1773.84	0.716082	0.233228	3.0703	0.00213841	0.0149091
ENSMUSG00000020458	RTN4	3652.09	0.713962	0.123532	5.77958	7.4889e-09	3.76635e-07
ENSMUSG00000038264	SEMA7A	1612.68	0.712687	0.217386	3.27843	0.00104386	0.00858648
ENSMUSG00000027387	ZC3H8	153.852	0.712455	0.193851	3.67527	0.000237601	0.00259277
ENSMUSG00000031105	SLC25A14	186.985	0.710327	0.185208	3.8353	0.000125411	0.00153142
ENSMUSG00000026827	GPD2	2345.08	0.709419	0.13272	5.34524	9.02952e-08	3.33279e-06
ENSMUSG00000079083	JRKL	333.065	0.708338	0.255775	2.76939	0.00561622	0.0312517
ENSMUSG00000019699	AKT3	637.956	0.708112	0.224863	3.14908	0.00163785	0.0121741
ENSMUSG00000040111	GRAMD1B	2438.5	0.707796	0.269562	2.62573	0.00864637	0.0430816
ENSMUSG00000040297	SUCO	1818.02	0.707264	0.244242	2.89575	0.00378251	0.0230461
ENSMUSG00000047694	YIPF6	798.825	0.707147	0.241459	2.92864	0.00340445	0.0212316
ENSMUSG00000074221	ZFP568	687.416	0.706734	0.185888	3.80194	0.00014357	0.00170657
ENSMUSG00000097589	DLEU2	435.423	0.706489	0.235706	2.99733	0.00272355	0.0178051
ENSMUSG00000050890	PDIK1L	1178.66	0.706277	0.220525	3.20271	0.00136141	0.0104584
ENSMUSG00000026484	RNF2	3555.9	0.705598	0.178153	3.96063	7.4751e-05	0.00101061
ENSMUSG00000060216	ARRB2	6218.4	0.703397	0.236537	2.97373	0.00294206	0.0189052
ENSMUSG00000051223	BZW1	11986.7	0.703056	0.210243	3.34401	0.000825756	0.00709235
ENSMUSG00000028293	SLC35A1	493.927	0.703012	0.176079	3.99259	6.53552e-05	0.000904517
ENSMUSG00000090035	GALNT4	466.586	0.702564	0.205028	3.42668	0.000611007	0.00552185
ENSMUSG00000040570	RUNDC3B	365.4	0.702114	0.256629	2.73591	0.00622078	0.0338065
ENSMUSG00000051510	MAFG	1107.64	0.701046	0.15158	4.62491	3.74754e-06	8.51894e-05
ENSMUSG00000021643	SERF1	418.846	0.700753	0.249861	2.80457	0.00503844	0.0287243
ENSMUSG00000054604	CGGBP1	4720.71	0.700168	0.195525	3.58096	0.000342336	0.0034718
ENSMUSG00000019810	FUCA2	1498.96	0.697205	0.162029	4.30296	1.68534e-05	0.000293994
ENSMUSG00000027712	ANXA5	1786.3	0.696971	0.222413	3.13368	0.00172628	0.0126997
ENSMUSG00000030446	ZFP273	291.983	0.696098	0.26763	2.60097	0.00929605	0.0455793
ENSMUSG00000000600	KRIT1	1628.55	0.695586	0.219847	3.16395	0.00155642	0.0117055
ENSMUSG00000041272	TOX	8852.71	0.695112	0.230974	3.00949	0.00261688	0.0172519
ENSMUSG00000010751	TNFRSF22	239.447	0.694947	0.221131	3.14269	0.00167404	0.0123648
ENSMUSG00000031112	STK26	3273.32	0.694725	0.219012	3.17209	0.00151346	0.0114374
ENSMUSG00000091264	SMIM13	927.573	0.69307	0.241602	2.86864	0.00412236	0.0247399
ENSMUSG00000047446	ARL4A	906.411	0.693042	0.152417	4.54702	5.44103e-06	0.000114829
ENSMUSG00000036282	NAA30	1186.39	0.692997	0.242371	2.85924	0.00424651	0.0253699
ENSMUSG00000026627	TMEM206	1040.13	0.692224	0.0953934	7.25652	3.97166e-13	5.46501e-11
ENSMUSG00000037315	JADE3	950.364	0.690925	0.228151	3.02837	0.00245877	0.0164941
ENSMUSG00000004565	PNPLA6	847.778	0.690592	0.170485	4.05074	5.10567e-05	0.000738583
ENSMUSG00000022299	SLC25A32	493.913	0.690507	0.226765	3.04503	0.00232654	0.0158428
ENSMUSG00000029475	KDM2B	5520.95	0.690368	0.127706	5.4059	6.44829e-08	2.48122e-06
ENSMUSG00000067199	FRAT1	487.921	0.689554	0.196509	3.50902	0.000449769	0.00430258
ENSMUSG00000084866	A930006K02RIK	79.6935	0.689241	0.236177	2.91832	0.00351924	0.0217699
ENSMUSG00000034659	TMEM109	1407.68	0.688679	0.176588	3.89991	9.62275e-05	0.00123057
ENSMUSG00000022378	FAM49B	3389.84	0.688449	0.212885	3.2339	0.00122114	0.00965685
ENSMUSG00000032120	C2CD2L	813.244	0.68841	0.163436	4.21211	2.52993e-05	0.000414426
ENSMUSG00000079845	XLR4A	1096.98	0.688041	0.21524	3.19662	0.0013905	0.0106343
ENSMUSG00000034158	LRRC58	2592.34	0.687422	0.266568	2.57878	0.00991493	0.0478498
ENSMUSG00000031256	CSTF2	4330.05	0.685365	0.148444	4.61698	3.89356e-06	8.78862e-05
ENSMUSG00000027132	KATNBL1	391.898	0.685329	0.244887	2.79855	0.00513319	0.029108
ENSMUSG00000027698	NCEH1	1315.54	0.684743	0.20302	3.37278	0.00074413	0.00650027
ENSMUSG00000029270	FAM69A	787.622	0.684321	0.193574	3.53519	0.00040748	0.00398219
ENSMUSG00000044330	GM9790	212.411	0.682792	0.207968	3.28316	0.00102651	0.00848026
ENSMUSG00000036591	ARHGAP21	1142.41	0.682781	0.228632	2.98637	0.00282312	0.0183098
ENSMUSG00000035596	MBOAT7	2645.43	0.68256	0.149909	4.55317	5.28428e-06	0.000112071
ENSMUSG00000052681	RAP1B	6479.03	0.681762	0.198786	3.42962	0.000604421	0.00547736
ENSMUSG00000039145	CAMK1D	1492.58	0.68126	0.182501	3.73292	0.000189274	0.00215169
ENSMUSG00000074220	ZFP382	282.892	0.681122	0.179673	3.7909	0.0001501	0.00177194
ENSMUSG00000020525	PPM1D	1312.89	0.680782	0.103269	6.59234	4.32936e-11	3.98209e-09
ENSMUSG00000014956	PPP1CB	6368.53	0.679872	0.234376	2.90078	0.0037224	0.0227443
ENSMUSG00000027835	PDCD10	2152.16	0.679662	0.180276	3.77013	0.000163163	0.0018975
ENSMUSG00000020948	KLHL28	413.331	0.678549	0.247668	2.73975	0.0061486	0.0335091
ENSMUSG00000032244	FEM1B	3657.49	0.677946	0.16775	4.04141	5.31311e-05	0.000764093
ENSMUSG00000031642	SH3RF1	1010.16	0.677731	0.169749	3.99255	6.53671e-05	0.000904517
ENSMUSG00000101111	GM28437	191474	0.677	0.227233	2.97933	0.00288883	0.0186516
ENSMUSG00000022957	ITSN1	114.712	0.676894	0.222028	3.04868	0.00229848	0.0156817
ENSMUSG00000032745	GPBP1	5505.25	0.676322	0.255251	2.64964	0.00805785	0.0409802
ENSMUSG00000085795	ZFP703	1050.4	0.676254	0.227312	2.975	0.0029299	0.018839
ENSMUSG00000061273	MMGT1	1656.59	0.676001	0.216159	3.12734	0.00176398	0.0129028
ENSMUSG00000024696	LPXN	3519.65	0.675581	0.242263	2.78862	0.00529326	0.0297432
ENSMUSG00000041153	OSGIN2	360.313	0.675543	0.207117	3.26165	0.00110766	0.008974
ENSMUSG00000018654	IKZF1	29283.2	0.675147	0.117426	5.74954	8.9485e-09	4.39755e-07
ENSMUSG00000034349	SMC4	18627.8	0.674318	0.248918	2.709	0.00674859	0.0358591
ENSMUSG00000066278	VPS37B	2519.45	0.673928	0.220528	3.05597	0.00224336	0.015399
ENSMUSG00000042505	SDHAF3	198.191	0.673286	0.204571	3.29122	0.000997554	0.00828485
ENSMUSG00000020580	ROCK2	1870.7	0.670815	0.241121	2.78207	0.00540141	0.0302521
ENSMUSG00000020794	UBE2G1	2318.93	0.670048	0.194242	3.44955	0.000561517	0.00515924
ENSMUSG00000020664	DLD	3186.32	0.669813	0.195641	3.42368	0.000617788	0.0055634
ENSMUSG00000005871	APC	2774.35	0.669497	0.219259	3.05345	0.00226229	0.0155087
ENSMUSG00000030380	MZF1	64.0647	0.668045	0.23921	2.79271	0.00522689	0.0295164
ENSMUSG00000039206	DAGLB	213.557	0.66753	0.22426	2.97659	0.00291472	0.0187835
ENSMUSG00000044224	DNAJC21	983.269	0.666965	0.205362	3.24776	0.00116318	0.00930981
ENSMUSG00000017831	RAB5A	1360.37	0.666823	0.187281	3.56054	0.000370088	0.00368161
ENSMUSG00000026502	DESI2	2080.09	0.666718	0.131133	5.08429	3.68997e-07	1.14356e-05
ENSMUSG00000041779	TRAM2	1148.19	0.665746	0.173116	3.84566	0.00012023	0.00147712
ENSMUSG00000022742	CPOX	849.543	0.664445	0.151737	4.37894	1.19259e-05	0.000220803
ENSMUSG00000021557	AGTPBP1	935.524	0.662981	0.178851	3.7069	0.000209814	0.00234185
ENSMUSG00000019952	POC1B	1075.29	0.662777	0.103286	6.41692	1.39059e-10	1.11767e-08
ENSMUSG00000031591	ASAH1	523.538	0.66227	0.201376	3.28873	0.0010064	0.00833815
ENSMUSG00000021431	SNRNP48	771.736	0.661864	0.16354	4.04712	5.18522e-05	0.000747575
ENSMUSG00000025016	TM9SF3	7834.05	0.661548	0.206023	3.21104	0.00132255	0.01021
ENSMUSG00000069206	ZFP874A	653.949	0.660326	0.252478	2.61538	0.00891271	0.044102
ENSMUSG00000021770	SAMD8	544.995	0.660205	0.183433	3.59917	0.000319238	0.00331375
ENSMUSG00000029186	PI4K2B	407.078	0.659956	0.223625	2.95118	0.00316566	0.0200192
ENSMUSG00000029234	TMEM165	1754.17	0.659952	0.123498	5.34381	9.10125e-08	3.35207e-06
ENSMUSG00000056216	CEBPG	2050.92	0.659312	0.191861	3.43641	0.000589472	0.00537019
ENSMUSG00000035898	UBA6	1633.57	0.659136	0.251773	2.61798	0.00884528	0.0438693
ENSMUSG00000030850	ATE1	1325.88	0.65835	0.146449	4.4954	6.9438e-06	0.000142013
ENSMUSG00000005615	PCYT1A	1357.29	0.658064	0.253866	2.59217	0.00953718	0.0464044
ENSMUSG00000101892	9130401M01RIK	1185.89	0.657637	0.170789	3.85058	0.00011784	0.00145711
ENSMUSG00000028771	PTPN12	1438.52	0.657527	0.161852	4.06251	4.8547e-05	0.000707036
ENSMUSG00000045671	SPRED2	2147.29	0.656129	0.149891	4.37738	1.20114e-05	0.00022167
ENSMUSG00000024538	PPIC	1101.76	0.656108	0.245919	2.66798	0.00763086	0.0394028
ENSMUSG00000027206	COPS2	2887.83	0.655136	0.254073	2.57853	0.00992212	0.0478711
ENSMUSG00000021256	VASH1	367.252	0.655064	0.251572	2.60388	0.00921753	0.0452794
ENSMUSG00000022205	SUB1	6703.47	0.654486	0.199409	3.28213	0.00103027	0.00849506
ENSMUSG00000040774	CEPT1	1646.39	0.652976	0.216867	3.01095	0.00260428	0.0172038
ENSMUSG00000031016	WEE1	1750.81	0.652918	0.23383	2.79228	0.0052338	0.0295249
ENSMUSG00000012640	ZFP715	854.261	0.652832	0.195297	3.34276	0.000829495	0.00710562
ENSMUSG00000032727	MIER3	1420.38	0.652707	0.18536	3.5213	0.000429436	0.0041496
ENSMUSG00000034575	PAPD7	1196.82	0.652691	0.155103	4.20811	2.57519e-05	0.000420639
ENSMUSG00000049488	TMEM67	149.767	0.652351	0.243849	2.67522	0.00746803	0.0387715
ENSMUSG00000103041	GM37305	285.768	0.652238	0.155835	4.18545	2.846e-05	0.000452833
ENSMUSG00000043067	DPY19L1	1103.07	0.652086	0.21099	3.0906	0.00199751	0.0141679
ENSMUSG00000053600	ZFP472	633.417	0.650669	0.244036	2.66628	0.00766962	0.0395318
ENSMUSG00000036309	SKP1A	10626.8	0.650564	0.151589	4.29163	1.7737e-05	0.00030661
ENSMUSG00000049225	PDP1	604.03	0.650128	0.204472	3.17954	0.00147508	0.0111768
ENSMUSG00000023026	DIP2B	2895.77	0.649676	0.198514	3.27269	0.00106528	0.00869201
ENSMUSG00000028690	MMACHC	614.682	0.649659	0.157548	4.12356	3.73057e-05	0.000567337
ENSMUSG00000043445	PGP	434.566	0.648948	0.211305	3.07114	0.00213244	0.0148838
ENSMUSG00000021676	IQGAP2	3493.08	0.648628	0.227314	2.85345	0.00432474	0.0256856
ENSMUSG00000037845	FDXACB1	213.477	0.648386	0.129571	5.00411	5.61209e-07	1.62505e-05
ENSMUSG00000066838	ZFP772	207.565	0.647945	0.162218	3.99429	6.48885e-05	0.000900066
ENSMUSG00000005371	FBXO11	1779.03	0.646914	0.228979	2.82521	0.00472495	0.027391
ENSMUSG00000021930	SPRYD7	286.188	0.645057	0.157779	4.08835	4.34455e-05	0.000643637
ENSMUSG00000026784	PDSS1	265.512	0.644063	0.187935	3.42705	0.000610181	0.00551793
ENSMUSG00000024516	SEC11C	2553.69	0.643371	0.158408	4.06148	4.87635e-05	0.000709588
ENSMUSG00000008763	MAN1A2	2711.35	0.642726	0.141655	4.53725	5.69938e-06	0.000119402
ENSMUSG00000050029	RAP2C	1833.61	0.641715	0.230193	2.78772	0.00530798	0.029797
ENSMUSG00000036990	OTUD4	3973.46	0.641617	0.247929	2.58791	0.00965613	0.0468638
ENSMUSG00000044768	D1ERTD622E	963.69	0.641498	0.233209	2.75075	0.00594595	0.0327685
ENSMUSG00000024750	ZFAND5	2466.6	0.639252	0.193006	3.31209	0.000926028	0.00781152
ENSMUSG00000015839	NFE2L2	1936.29	0.638362	0.165758	3.85117	0.000117553	0.00145461
ENSMUSG00000024014	PIM1	3035.11	0.637566	0.204472	3.1181	0.00182018	0.0131709
ENSMUSG00000035614	FAM179B	1480.76	0.637389	0.185946	3.42781	0.00060847	0.00550825
ENSMUSG00000019792	TRMT11	483.524	0.636834	0.207924	3.06283	0.00219257	0.0151496
ENSMUSG00000024259	SLC25A46	1442.46	0.636719	0.217363	2.92929	0.00339733	0.0211948
ENSMUSG00000046138	9930021J03RIK	1748.34	0.636472	0.216004	2.94658	0.00321311	0.0202438
ENSMUSG00000031628	CASP3	4571.09	0.636003	0.184211	3.45258	0.000555252	0.00510713
ENSMUSG00000035958	TDP2	986.365	0.635961	0.235708	2.69808	0.00697399	0.0367936
ENSMUSG00000031861	LPAR2	1329.1	0.635522	0.126995	5.00432	5.60596e-07	1.62505e-05
ENSMUSG00000024383	MAP3K2	1765.03	0.635492	0.245254	2.59116	0.00956525	0.0464884
ENSMUSG00000049184	PURG	179.799	0.635232	0.207338	3.06375	0.00218579	0.0151168
ENSMUSG00000036698	AGO2	7551.73	0.633902	0.21646	2.92849	0.0034061	0.0212341
ENSMUSG00000097167	GM16740	120.684	0.633715	0.210406	3.01187	0.00259641	0.0171934
ENSMUSG00000021392	NOL8	1563.5	0.633715	0.215479	2.94096	0.00327197	0.0205319
ENSMUSG00000037029	ZFP146	2051.59	0.633558	0.198043	3.19909	0.00137862	0.0105615
ENSMUSG00000030521	MPHOSPH10	1662.24	0.633514	0.223047	2.84027	0.0045075	0.0264875
ENSMUSG00000050914	ANKRD37	59.0214	0.633016	0.231505	2.73435	0.00625029	0.0339132
ENSMUSG00000027635	DSN1	505.571	0.632362	0.246195	2.56855	0.0102126	0.0489296
ENSMUSG00000034064	POGLUT1	1322.05	0.631559	0.0886933	7.1207	1.07382e-12	1.36812e-10
ENSMUSG00000035847	IDS	794.825	0.630321	0.195423	3.22541	0.00125792	0.00985254
ENSMUSG00000032412	ATP1B3	8595.51	0.629745	0.219667	2.86681	0.00414634	0.0248715
ENSMUSG00000027346	GPCPD1	1070	0.629715	0.240836	2.6147	0.00893053	0.0441492
ENSMUSG00000074876	SPATA5L1	390.499	0.629247	0.167325	3.76062	0.000169495	0.00196054
ENSMUSG00000026659	DUSP12	585.783	0.629204	0.152157	4.13523	3.54601e-05	0.000542627
ENSMUSG00000078317	F8A	527.547	0.628818	0.175567	3.58163	0.000341455	0.00346491
ENSMUSG00000030452	NIPA2	927.37	0.62764	0.192996	3.25209	0.00114562	0.0092051
ENSMUSG00000022339	EBAG9	594.579	0.627536	0.179766	3.49086	0.000481471	0.00454767
ENSMUSG00000026563	TADA1	1680.23	0.627127	0.0916587	6.84198	7.81045e-12	8.34409e-10
ENSMUSG00000021072	TMX1	1468.09	0.626903	0.206325	3.03843	0.00237817	0.0160538
ENSMUSG00000031715	SMARCA5	7934.71	0.626791	0.222145	2.82154	0.00477935	0.0276318
ENSMUSG00000028187	RPF1	1694.71	0.625724	0.175362	3.56818	0.000359474	0.00360649
ENSMUSG00000047554	TMEM41B	829.418	0.625608	0.161665	3.86979	0.000108929	0.0013636
ENSMUSG00000074398	GM15441	74.7755	0.624974	0.241683	2.58592	0.00971187	0.0470547
ENSMUSG00000005667	MTHFD2	1999.15	0.624709	0.173518	3.60024	0.00031792	0.00330406
ENSMUSG00000008318	RELT	922.176	0.623743	0.223747	2.78772	0.00530803	0.029797
ENSMUSG00000070691	RUNX3	4686.81	0.623012	0.223795	2.78386	0.00537169	0.0301249
ENSMUSG00000062906	HDAC10	531.532	0.622803	0.221816	2.80774	0.00498899	0.028518
ENSMUSG00000024065	EHD3	6051.41	0.621887	0.215268	2.88889	0.00386602	0.0234552
ENSMUSG00000019832	RAB32	313.303	0.620485	0.209778	2.95782	0.00309826	0.0196787
ENSMUSG00000034126	POMT2	725.572	0.619581	0.150618	4.11359	3.89555e-05	0.000589819
ENSMUSG00000039153	RUNX2	1077.94	0.619328	0.228611	2.70909	0.00674677	0.0358591
ENSMUSG00000024754	TMEM2	155.682	0.619059	0.195819	3.16138	0.00157025	0.0117889
ENSMUSG00000037400	ATP11B	3460.3	0.617615	0.236361	2.61301	0.00897478	0.0443199
ENSMUSG00000027397	SLC20A1	2648.92	0.617527	0.143367	4.30732	1.65247e-05	0.000288846
ENSMUSG00000049232	TIGD2	1099.01	0.617462	0.143559	4.30111	1.69942e-05	0.000295477
ENSMUSG00000041187	PRKD2	8795.8	0.616343	0.224877	2.7408	0.00612903	0.0334346
ENSMUSG00000041961	ZNRF3	792.597	0.61602	0.2237	2.75378	0.00589122	0.0324981
ENSMUSG00000023021	CERS5	1445.39	0.615672	0.146735	4.1958	2.71908e-05	0.000439138
ENSMUSG00000028709	MOB3C	730.956	0.615668	0.185524	3.31854	0.000904887	0.0076708
ENSMUSG00000055128	CGRRF1	175.966	0.615255	0.227518	2.7042	0.00684688	0.0363028
ENSMUSG00000050697	PRKAA1	1420.58	0.614635	0.161393	3.8083	0.000139924	0.0016748
ENSMUSG00000046324	ERMP1	2919.64	0.613855	0.116135	5.28569	1.25234e-07	4.3781e-06
ENSMUSG00000048921	ZFP689	391.831	0.613358	0.114013	5.37973	7.45996e-08	2.81385e-06
ENSMUSG00000006494	PDK1	3894.21	0.612545	0.130873	4.68047	2.86219e-06	6.77163e-05
ENSMUSG00000029415	SDAD1	3547.05	0.612251	0.151111	4.05165	5.08568e-05	0.000736931
ENSMUSG00000011008	MCOLN2	944.701	0.611549	0.225651	2.71015	0.00672525	0.0358014
ENSMUSG00000019528	GYG	3339.84	0.610843	0.193793	3.15203	0.00162138	0.0120778
ENSMUSG00000027599	ARMC1	1602.48	0.610772	0.168921	3.61572	0.000299518	0.00314704
ENSMUSG00000020561	TWISTNB	1472.34	0.610685	0.201831	3.02572	0.00248043	0.0165935
ENSMUSG00000060935	TMEM263	901.146	0.609401	0.194543	3.13248	0.00173338	0.0127193
ENSMUSG00000041263	RUSC1	1056.94	0.608668	0.214375	2.83926	0.00452178	0.0265533
ENSMUSG00000031093	DOCK11	6927.67	0.608457	0.232537	2.6166	0.00888099	0.043983
ENSMUSG00000022514	IL1RAP	358.32	0.608347	0.202988	2.99696	0.00272687	0.0178196
ENSMUSG00000038495	OTUD7B	1285.52	0.608198	0.194202	3.13178	0.00173752	0.0127389
ENSMUSG00000029328	HNRNPDL	6218.18	0.605829	0.172539	3.51125	0.000446003	0.00427845
ENSMUSG00000009905	KDSR	1218.96	0.604937	0.149173	4.05526	5.00782e-05	0.000726874
ENSMUSG00000020132	RAB21	1793.6	0.604739	0.160163	3.77577	0.000159516	0.00186391
ENSMUSG00000073131	VMA21	1040.89	0.604613	0.226124	2.67381	0.00749943	0.0388993
ENSMUSG00000041189	CHRNB1	151.273	0.604478	0.235367	2.56824	0.0102217	0.0489593
ENSMUSG00000024642	TLE4	2154.88	0.603859	0.17286	3.49335	0.000477002	0.00450793
ENSMUSG00000078779	ZFP59	378.317	0.603768	0.20563	2.93618	0.00332282	0.0207827
ENSMUSG00000052291	5330438D12RIK	100.728	0.601537	0.1917	3.13791	0.00170158	0.0125342
ENSMUSG00000058013	2011-09-01	5493.64	0.599751	0.184025	3.25907	0.00111779	0.00904327
ENSMUSG00000035370	ADAT3	203.568	0.59951	0.185656	3.22914	0.00124161	0.00978722
ENSMUSG00000028577	PLAA	3248.6	0.599259	0.179147	3.34506	0.000822649	0.00707478
ENSMUSG00000049858	SUOX	1716.94	0.598295	0.210405	2.84354	0.00446148	0.0262799
ENSMUSG00000026864	HSPA5	16037.8	0.597841	0.163187	3.66354	0.00024875	0.00269088
ENSMUSG00000028568	BTF3L4	2479.36	0.597702	0.145262	4.11466	3.87751e-05	0.000587605
ENSMUSG00000103906	TIGD5	209.023	0.59749	0.206691	2.89074	0.00384338	0.0233478
ENSMUSG00000072872	RYBP	1481.27	0.597238	0.18037	3.31117	0.000929053	0.00782552
ENSMUSG00000017776	CRK	2339.91	0.596867	0.16793	3.55426	0.000379049	0.00375556
ENSMUSG00000032252	GLCE	613.423	0.595938	0.222452	2.67895	0.00738526	0.0384579
ENSMUSG00000009030	PDCL	1417.97	0.594864	0.141461	4.20516	2.60901e-05	0.00042455
ENSMUSG00000074746	PDZD8	3288.22	0.594842	0.199109	2.98752	0.00281248	0.0182615
ENSMUSG00000086841	2410006H16RIK	3782.52	0.593303	0.19705	3.01092	0.00260458	0.0172038
ENSMUSG00000075327	ZBTB2	1660.85	0.593056	0.106886	5.54848	2.88166e-08	1.2178e-06
ENSMUSG00000046841	CKAP4	691.656	0.591379	0.196347	3.01192	0.00259605	0.0171934
ENSMUSG00000019861	GOPC	890.813	0.591176	0.201545	2.93322	0.00335461	0.0209547
ENSMUSG00000040212	EMP3	2001.45	0.589198	0.217261	2.71194	0.00668905	0.0356584
ENSMUSG00000032475	NCK1	1590.86	0.589015	0.182521	3.2271	0.00125052	0.00981649
ENSMUSG00000020246	HCFC2	1140.04	0.588321	0.159074	3.69841	0.000216951	0.00240902
ENSMUSG00000037643	PRKCI	1058.84	0.58713	0.143837	4.08191	4.46672e-05	0.000658238
ENSMUSG00000024068	SPAST	2691.87	0.586467	0.18645	3.14544	0.00165836	0.0122789
ENSMUSG00000066647	GM5113	234.262	0.586289	0.183177	3.20066	0.00137112	0.0105142
ENSMUSG00000025630	HPRT	3642.2	0.586104	0.199263	2.94136	0.00326777	0.020513
ENSMUSG00000079427	MTHFSL	349.831	0.585878	0.171035	3.42548	0.000613714	0.00553534
ENSMUSG00000097048	1600020E01RIK	385.23	0.585655	0.145065	4.0372	5.40928e-05	0.000773396
ENSMUSG00000027177	HIPK3	1690.29	0.585178	0.225515	2.59485	0.00946334	0.0461626
ENSMUSG00000000134	TFE3	1402.18	0.585141	0.189683	3.08484	0.00203663	0.0143624
ENSMUSG00000019818	CD164	10826.7	0.583777	0.215424	2.70989	0.00673047	0.0358181
ENSMUSG00000023068	NUS1	1678.68	0.582785	0.219905	2.65017	0.00804512	0.0409518
ENSMUSG00000058240	CRYZL1	429.553	0.581799	0.182538	3.18727	0.00143622	0.0109353
ENSMUSG00000030172	ERC1	931.969	0.581584	0.166157	3.50021	0.00046489	0.00441774
ENSMUSG00000064289	TANK	1218.16	0.580975	0.165164	3.51757	0.000435517	0.00420278
ENSMUSG00000044807	ZFP354C	483.218	0.578918	0.218419	2.6505	0.00803737	0.0409244
ENSMUSG00000025050	PCGF6	762.162	0.576176	0.215063	2.6791	0.00738207	0.0384529
ENSMUSG00000026767	FAM188A	763.466	0.575526	0.137133	4.19684	2.70665e-05	0.000437952
ENSMUSG00000024487	YIPF5	1722.47	0.575167	0.153884	3.73766	0.000185738	0.0021199
ENSMUSG00000033953	PPP3R1	3900.78	0.574745	0.19051	3.01687	0.00255397	0.0169673
ENSMUSG00000021427	SSR1	6920.71	0.573596	0.166178	3.45171	0.000557052	0.00512095
ENSMUSG00000026159	AGFG1	4629.55	0.57355	0.220558	2.60045	0.00931017	0.0456355
ENSMUSG00000049672	ZBTB14	1191.13	0.573088	0.135016	4.24461	2.18978e-05	0.000367676
ENSMUSG00000027722	SPATA5	1341.69	0.57278	0.149688	3.82649	0.000129982	0.00157332
ENSMUSG00000010095	SLC3A2	4386.59	0.572771	0.155333	3.68737	0.000226584	0.00249344
ENSMUSG00000025006	SORBS1	287.135	0.572498	0.222449	2.57361	0.0100644	0.0483676
ENSMUSG00000042167	PAPD4	1717.95	0.571872	0.157338	3.63467	0.00027834	0.00295339
ENSMUSG00000021752	KCTD6	100.387	0.571434	0.193602	2.95159	0.00316147	0.0200063
ENSMUSG00000060073	PSMA3	2466.53	0.571428	0.212719	2.6863	0.00722481	0.0378055
ENSMUSG00000026737	PIP4K2A	3167.39	0.570547	0.129303	4.41249	1.02187e-05	0.000193357
ENSMUSG00000004364	CUL3	5216.9	0.570541	0.213544	2.67177	0.00754521	0.0390309
ENSMUSG00000034610	ZCCHC11	3203.7	0.570484	0.206196	2.76671	0.00566249	0.0314481
ENSMUSG00000032403	2300009A05RIK	328.146	0.570237	0.168922	3.37574	0.000736167	0.00643725
ENSMUSG00000025939	UBE2W	783.092	0.570099	0.191311	2.97996	0.00288291	0.0186204
ENSMUSG00000024052	LPIN2	2349.46	0.569557	0.133581	4.26374	2.01029e-05	0.00034167
ENSMUSG00000032180	TMED1	363.44	0.569109	0.17248	3.29956	0.000968351	0.00809706
ENSMUSG00000029657	HSPH1	3690.97	0.569084	0.216104	2.63338	0.00845394	0.0424301
ENSMUSG00000062078	QK	3168.71	0.568206	0.200154	2.83884	0.00452781	0.0265797
ENSMUSG00000063334	KRR1	1972.6	0.568126	0.201073	2.82548	0.00472103	0.0273867
ENSMUSG00000037395	RCOR3	277.669	0.567761	0.183384	3.09603	0.00196134	0.0139747
ENSMUSG00000036432	SIAH2	638.542	0.567456	0.166434	3.40949	0.000650841	0.00579723
ENSMUSG00000035764	FBXO45	1376.33	0.566786	0.217455	2.60645	0.00914859	0.0450102
ENSMUSG00000073563	CSNK1G3	1635.16	0.566597	0.133438	4.24615	2.17479e-05	0.000366012
ENSMUSG00000052593	ADAM17	2081.04	0.566477	0.196764	2.87896	0.00398987	0.0240539
ENSMUSG00000024317	RNF138	1396.1	0.566425	0.210786	2.6872	0.00720533	0.0377495
ENSMUSG00000078622	CCDC47	2829.11	0.565503	0.195452	2.8933	0.00381214	0.0231938
ENSMUSG00000097403	9230116N13RIK	81.3416	0.565345	0.205899	2.74575	0.00603731	0.0331022
ENSMUSG00000038822	HACE1	518.347	0.565316	0.186844	3.02561	0.00248131	0.0165935
ENSMUSG00000025935	TRAM1	6330.82	0.564273	0.133452	4.22829	2.35477e-05	0.000389818
ENSMUSG00000043929	KLHL15	323.637	0.563678	0.193207	2.91748	0.00352873	0.0218164
ENSMUSG00000027823	GMPS	3830.35	0.562954	0.205785	2.73564	0.00622593	0.0338183
ENSMUSG00000022752	TOMM70A	5258.59	0.562854	0.183043	3.07498	0.00210518	0.0147012
ENSMUSG00000020817	RABEP1	1549.17	0.562395	0.18759	2.998	0.00271761	0.017786
ENSMUSG00000025287	ACOT9	694.763	0.562071	0.172643	3.25569	0.00113117	0.00910863
ENSMUSG00000024190	DUSP1	429.853	0.561708	0.178103	3.15384	0.00161137	0.0120241
ENSMUSG00000066415	MSL2	4784.04	0.560572	0.181717	3.08487	0.00203642	0.0143624
ENSMUSG00000029422	RSRC2	3214.65	0.560228	0.209611	2.6727	0.00752427	0.0389508
ENSMUSG00000026721	RABGAP1L	3478.22	0.560168	0.216837	2.58335	0.0097845	0.0473133
ENSMUSG00000032423	SYNCRIP	10463.8	0.559958	0.207724	2.69569	0.00702435	0.0370156
ENSMUSG00000033769	EXOC6B	1070.27	0.559068	0.180589	3.09581	0.00196279	0.0139752
ENSMUSG00000022744	CLDND1	1351.25	0.558995	0.101758	5.4934	3.94272e-08	1.60463e-06
ENSMUSG00000040351	ANKIB1	2294.6	0.557732	0.177472	3.14265	0.00167428	0.0123648
ENSMUSG00000024528	SRFBP1	1291.39	0.557374	0.176668	3.15492	0.00160544	0.0119903
ENSMUSG00000036533	CDC42EP3	1439.04	0.55595	0.140124	3.96755	7.26163e-05	0.000988133
ENSMUSG00000031681	SMAD1	1163.78	0.553755	0.0975107	5.67891	1.35554e-08	6.3185e-07
ENSMUSG00000059970	HSPA2	166.566	0.553038	0.194984	2.83633	0.00456353	0.0267528
ENSMUSG00000031201	BRCC3	1012.03	0.552746	0.180851	3.05636	0.00224039	0.0153893
ENSMUSG00000045078	RNF216	1248.39	0.552735	0.162257	3.40653	0.000657944	0.00585747
ENSMUSG00000051469	ZFP24	1920.56	0.551383	0.186034	2.96389	0.00303774	0.019373
ENSMUSG00000029290	ZFP326	709.186	0.55077	0.18753	2.93697	0.0033144	0.0207586
ENSMUSG00000039100	2006-03-01	3961.45	0.550115	0.202853	2.71189	0.0066901	0.0356584
ENSMUSG00000021147	WDR37	2154.55	0.5475	0.163737	3.34378	0.000826448	0.00709235
ENSMUSG00000032913	LRIG2	887.706	0.547156	0.187592	2.91673	0.00353725	0.021838
ENSMUSG00000032666	1700025G04RIK	957.019	0.546196	0.169538	3.22167	0.00127444	0.00994121
ENSMUSG00000015961	ADSS	5304.67	0.546138	0.144871	3.76982	0.000163363	0.00189854
ENSMUSG00000054766	SET	11813.1	0.545989	0.184966	2.95183	0.00315894	0.0199977
ENSMUSG00000028849	MAP7D1	5978.23	0.545979	0.198668	2.7482	0.00599238	0.0329142
ENSMUSG00000033319	FEM1C	2049.12	0.544762	0.189619	2.87293	0.00406681	0.0244577
ENSMUSG00000022377	ASAP1	1730.97	0.544029	0.161383	3.37104	0.000748853	0.00653158
ENSMUSG00000031609	SAP30	1050.37	0.543875	0.191983	2.83294	0.00461223	0.0268931
ENSMUSG00000018334	KSR1	1309.31	0.543763	0.16575	3.28063	0.00103577	0.0085324
ENSMUSG00000028232	TMEM68	536.815	0.542781	0.201559	2.69292	0.00708299	0.0372789
ENSMUSG00000026473	GLUL	3505.14	0.541997	0.150248	3.60736	0.000309329	0.00323039
ENSMUSG00000030265	KRAS	2829.19	0.5418	0.206316	2.62607	0.0086378	0.0430638
ENSMUSG00000027739	RAB33B	564.906	0.540909	0.164075	3.29671	0.000978232	0.00817173
ENSMUSG00000020077	SRGN	9388.46	0.54046	0.173405	3.11675	0.00182856	0.0132148
ENSMUSG00000090110	CMC4	178.77	0.540228	0.167816	3.21917	0.00128564	0.0100059
ENSMUSG00000021786	OXSM	580.238	0.539732	0.187964	2.87147	0.00408569	0.0245541
ENSMUSG00000043702	PDE12	1909.17	0.539538	0.15531	3.47394	0.000512878	0.00478649
ENSMUSG00000045867	CRADD	292.336	0.539248	0.159579	3.3792	0.00072697	0.00636978
ENSMUSG00000014905	DNAJB9	870.165	0.538775	0.19824	2.71779	0.00657197	0.0352472
ENSMUSG00000042105	INPP5F	377.314	0.538465	0.18885	2.85129	0.00435425	0.0258074
ENSMUSG00000090946	CCDC71L	858.135	0.538121	0.165851	3.2446	0.00117615	0.00939611
ENSMUSG00000040565	BTAF1	2600.06	0.537657	0.183964	2.92261	0.00347107	0.0215222
ENSMUSG00000037885	STK35	1067.71	0.537003	0.173211	3.10027	0.00193341	0.0138273
ENSMUSG00000040675	MTHFD1L	2627.81	0.536183	0.155254	3.4536	0.000553167	0.0050934
ENSMUSG00000037316	BAG4	1271.27	0.535815	0.108127	4.95542	7.21728e-07	2.02839e-05
ENSMUSG00000030042	POLE4	1895.88	0.534832	0.147583	3.62393	0.000290155	0.00305613
ENSMUSG00000047044	D030056L22RIK	727.849	0.534591	0.162422	3.29137	0.000996996	0.00828461
ENSMUSG00000035049	RRP12	2445.59	0.534217	0.202458	2.63866	0.00832345	0.0419957
ENSMUSG00000000782	TCF7	84410.3	0.534113	0.10837	4.92861	8.28181e-07	2.28281e-05
ENSMUSG00000020328	NUDCD2	1211.07	0.533968	0.206675	2.58361	0.00977722	0.0472914
ENSMUSG00000033813	TCEA1	4517.13	0.533959	0.196388	2.7189	0.00654989	0.0351526
ENSMUSG00000021936	MAPK8	1020.77	0.533438	0.166047	3.21258	0.00131546	0.0101665
ENSMUSG00000020283	PEX13	1511.73	0.532323	0.161696	3.29211	0.000994374	0.00827442
ENSMUSG00000049969	PLEKHF2	1626.36	0.532155	0.180994	2.94018	0.00328017	0.0205739
ENSMUSG00000027357	CRLS1	790.4	0.5321	0.199954	2.66112	0.00778822	0.0399515
ENSMUSG00000011960	CCNT1	3457.6	0.532011	0.184904	2.87723	0.00401187	0.0241781
ENSMUSG00000020696	RFFL	517.818	0.531184	0.163003	3.25873	0.00111913	0.00904558
ENSMUSG00000033417	CACUL1	2776.52	0.531148	0.147802	3.59366	0.000326065	0.00335025
ENSMUSG00000023961	ENPP4	1076.46	0.530571	0.168893	3.14146	0.0016811	0.0124045
ENSMUSG00000024805	PCGF5	1265.59	0.53032	0.172965	3.06606	0.002169	0.0150627
ENSMUSG00000022911	ARL13B	325.015	0.529729	0.165994	3.19125	0.0014166	0.0108195
ENSMUSG00000034538	ZFP418	144.101	0.529712	0.198996	2.66192	0.0077696	0.0399036
ENSMUSG00000036093	ARL5A	1741.18	0.5285	0.205586	2.5707	0.0101492	0.048653
ENSMUSG00000062210	TNFAIP8	4451.92	0.527005	0.188946	2.78919	0.00528407	0.0297013
ENSMUSG00000028098	RNF115	2463.9	0.525962	0.112096	4.69209	2.70433e-06	6.41579e-05
ENSMUSG00000021890	EAF1	4259.5	0.523441	0.11456	4.56913	4.89743e-06	0.000105133
ENSMUSG00000091811	INAFM1	283.774	0.522397	0.16115	3.24169	0.00118825	0.00947952
ENSMUSG00000028273	PDLIM5	892.687	0.522159	0.173698	3.00613	0.00264597	0.0173971
ENSMUSG00000021754	MAP3K1	3557.2	0.52141	0.178349	2.92354	0.00346078	0.0214805
ENSMUSG00000028410	DNAJA1	10365.8	0.521393	0.183231	2.84555	0.00443354	0.0261501
ENSMUSG00000031751	AMFR	3825.28	0.519749	0.138389	3.7557	0.000172854	0.00198869
ENSMUSG00000007415	GATAD1	2353.3	0.519451	0.101062	5.13992	2.74855e-07	8.80356e-06
ENSMUSG00000029471	CAMKK2	2689.81	0.519412	0.181731	2.85813	0.00426139	0.0254411
ENSMUSG00000020585	LAPTM4A	4051.1	0.519382	0.110223	4.71211	2.45169e-06	5.88079e-05
ENSMUSG00000016308	UBE2A	1704.81	0.518852	0.131843	3.93537	8.30673e-05	0.00109651
ENSMUSG00000048661	LEMD3	819.391	0.518491	0.181441	2.85763	0.00426821	0.0254642
ENSMUSG00000074781	UBE2N	2783.75	0.518429	0.170055	3.0486	0.0022991	0.0156817
ENSMUSG00000004319	CLCN3	2082.99	0.517897	0.189358	2.73502	0.00623774	0.0338665
ENSMUSG00000046962	ZBTB21	981.512	0.516889	0.112858	4.58	4.64977e-06	0.00010098
ENSMUSG00000050549	5730508B09RIK	485.529	0.516888	0.148545	3.47966	0.000502046	0.00471096
ENSMUSG00000032202	RAB27A	9781.6	0.516881	0.137498	3.75919	0.000170466	0.00196648
ENSMUSG00000058835	ABI1	4128.12	0.516448	0.12659	4.07969	4.50953e-05	0.000662037
ENSMUSG00000030811	FBXL19	2196.51	0.516345	0.155931	3.31137	0.000928393	0.00782552
ENSMUSG00000031987	EGLN1	3363.44	0.516002	0.130431	3.95612	7.61764e-05	0.00102602
ENSMUSG00000007812	ZFP655	1599.22	0.515135	0.189778	2.71441	0.00663941	0.0354615
ENSMUSG00000018377	VEZF1	3435.1	0.515132	0.191502	2.68995	0.00714622	0.0375199
ENSMUSG00000013662	ATAD1	3232.58	0.515129	0.197106	2.61346	0.00896298	0.0442744
ENSMUSG00000031834	PIK3R2	1552.27	0.514981	0.188638	2.73	0.00633352	0.0342851
ENSMUSG00000020788	ATP2A3	20457.2	0.513777	0.188458	2.72621	0.00640655	0.0345432
ENSMUSG00000049516	SPTY2D1	2028.74	0.512201	0.124795	4.10433	4.05497e-05	0.000608068
ENSMUSG00000035929	H2-Q4	7746.17	0.510327	0.192817	2.64669	0.00812827	0.0412043
ENSMUSG00000004591	PKN2	2238.6	0.510067	0.198175	2.57383	0.010058	0.0483504
ENSMUSG00000033184	TMED7	3624.77	0.509673	0.197872	2.57577	0.0100018	0.0481879
ENSMUSG00000047547	CLTB	1056.96	0.509584	0.1885	2.70337	0.00686402	0.0363529
ENSMUSG00000030245	GOLT1B	1336.31	0.508825	0.121941	4.17273	3.00976e-05	0.000471682
ENSMUSG00000066735	VKORC1L1	1853.88	0.508397	0.152249	3.33924	0.000840079	0.00717802
ENSMUSG00000028274	RNGTT	1238.46	0.507952	0.189494	2.68058	0.00734957	0.0383417
ENSMUSG00000026037	ORC2	1710.84	0.507272	0.195672	2.59247	0.00952899	0.0463776
ENSMUSG00000000605	CLCN4	2111.94	0.507264	0.175526	2.88996	0.00385291	0.0233839
ENSMUSG00000026395	PTPRC	28362.3	0.506062	0.183217	2.76209	0.00574334	0.0318252
ENSMUSG00000026753	PPP6C	2913.74	0.505715	0.148473	3.40611	0.000658952	0.00586341
ENSMUSG00000021728	EMB	3697.85	0.503993	0.164397	3.06571	0.00217157	0.0150627
ENSMUSG00000032567	ASTE1	379.204	0.503714	0.164539	3.06137	0.00220326	0.0151949
ENSMUSG00000051306	USP42	1839.17	0.501767	0.110669	4.53393	5.78969e-06	0.000121
ENSMUSG00000026960	ARL6IP6	1019.57	0.500942	0.192298	2.60502	0.00918679	0.0451723
ENSMUSG00000060733	IPMK	1079.27	0.500886	0.125248	3.99914	6.35727e-05	0.000884669
ENSMUSG00000019877	SERINC1	2911.02	0.500722	0.175324	2.85599	0.00429034	0.0255519
ENSMUSG00000021987	MTMR6	2418.94	0.500711	0.15139	3.30742	0.000941593	0.00789634
ENSMUSG00000024505	DTWD2	238.779	0.500683	0.16179	3.09465	0.00197043	0.0140105
ENSMUSG00000051790	NLGN2	1094.33	0.500524	0.192604	2.59872	0.00935711	0.0458026
ENSMUSG00000020611	GNA13	5555.47	0.500068	0.162594	3.07557	0.00210101	0.01469
ENSMUSG00000070972	DNAJC25	206.092	0.499681	0.180577	2.76714	0.00565502	0.0314168
ENSMUSG00000034175	RHBDD3	323.347	0.498722	0.158592	3.14469	0.00166261	0.0122945
ENSMUSG00000027809	ETFDH	2012.19	0.498527	0.112767	4.42087	9.83065e-06	0.000188084
ENSMUSG00000027088	PHOSPHO2	1002.8	0.498194	0.148451	3.35595	0.000790918	0.00683741
ENSMUSG00000034765	DUSP5	3703.32	0.497315	0.188297	2.64113	0.00826302	0.0417411
ENSMUSG00000042650	ALKBH5	4758.02	0.497184	0.100146	4.96459	6.88467e-07	1.94764e-05
ENSMUSG00000032267	USP28	946.989	0.497053	0.141442	3.51419	0.000441097	0.00424085
ENSMUSG00000022507	1810013L24RIK	1468.65	0.497052	0.167595	2.96578	0.00301914	0.0192974
ENSMUSG00000075033	NXPE3	1273.17	0.496699	0.173806	2.85778	0.00426614	0.0254607
ENSMUSG00000032336	NPTN	2754.4	0.496475	0.133076	3.73076	0.000190901	0.00216732
ENSMUSG00000028788	PTP4A2	12868.6	0.496005	0.130201	3.80954	0.000139228	0.00166879
ENSMUSG00000062198	2700097O09RIK	263.194	0.495768	0.181637	2.72945	0.00634406	0.034303
ENSMUSG00000021905	DPH3	1045.87	0.494996	0.107583	4.60108	4.20315e-06	9.35241e-05
ENSMUSG00000032570	ATP2C1	1222.97	0.494871	0.169342	2.92233	0.00347428	0.0215343
ENSMUSG00000022136	DNAJC3	5139.32	0.49463	0.154375	3.20408	0.00135494	0.0104226
ENSMUSG00000057363	UXS1	976.12	0.494096	0.117367	4.20985	2.55536e-05	0.000417796
ENSMUSG00000024145	PIGF	234.038	0.493722	0.191981	2.57172	0.0101195	0.0485739
ENSMUSG00000055447	CD47	14166	0.493205	0.185313	2.66147	0.00778002	0.0399214
ENSMUSG00000027091	ZC3H15	3477.08	0.493111	0.164104	3.00486	0.00265704	0.0174565
ENSMUSG00000025577	CBX2	2206.73	0.492139	0.189046	2.60328	0.00923372	0.0453331
ENSMUSG00000070923	KLHL9	4297.53	0.492093	0.179348	2.74378	0.00607354	0.0332373
ENSMUSG00000026576	ATP1B1	1788.3	0.491837	0.169069	2.9091	0.00362476	0.0222664
ENSMUSG00000038582	PPTC7	1622.05	0.491793	0.161725	3.04093	0.0023585	0.0159772
ENSMUSG00000025049	TAF5	582.083	0.491324	0.172207	2.8531	0.00432951	0.025705
ENSMUSG00000074825	ITPRIPL1	983.621	0.48999	0.123797	3.958	7.55808e-05	0.0010196
ENSMUSG00000057982	ZFP809	355.304	0.489783	0.174785	2.8022	0.00507551	0.0288686
ENSMUSG00000039361	PICALM	4613.76	0.489702	0.162828	3.00748	0.00263419	0.0173395
ENSMUSG00000030753	THAP12	3362.14	0.489616	0.156403	3.13048	0.00174522	0.0127844
ENSMUSG00000037253	MEX3C	1694.87	0.48864	0.172096	2.83934	0.00452072	0.0265533
ENSMUSG00000073700	KLHL21	1429.91	0.488401	0.15873	3.07692	0.00209152	0.0146415
ENSMUSG00000020654	ADCY3	1351.39	0.483884	0.149387	3.23913	0.00119897	0.0095361
ENSMUSG00000030619	EED	1811.5	0.483669	0.172868	2.79791	0.00514346	0.0291491
ENSMUSG00000041040	FAM117B	1876.99	0.482939	0.174789	2.76298	0.00572769	0.031759
ENSMUSG00000036155	MGAT5	6573.4	0.482506	0.178617	2.70135	0.00690591	0.0365033
ENSMUSG00000071533	PCNP	2841.52	0.482217	0.184415	2.61485	0.00892659	0.0441453
ENSMUSG00000039985	FAM60A	2855.8	0.48198	0.180344	2.67256	0.00752751	0.038951
ENSMUSG00000023852	CHD1	6699.54	0.481745	0.180691	2.66612	0.00767313	0.0395319
ENSMUSG00000070462	MESDC1	1618.77	0.480713	0.164909	2.91502	0.00355662	0.0219169
ENSMUSG00000037339	FAM53A	1959.38	0.479527	0.134663	3.56093	0.000369539	0.00368041
ENSMUSG00000040389	WDR47	325.554	0.478756	0.182805	2.61895	0.00882015	0.0437699
ENSMUSG00000059920	4930453N24RIK	1659.65	0.478752	0.159807	2.99582	0.0027371	0.0178664
ENSMUSG00000059866	TNIP2	436.234	0.476256	0.167818	2.83793	0.00454068	0.0266363
ENSMUSG00000021076	ACTR10	4055.89	0.475279	0.176711	2.68959	0.00715407	0.0375496
ENSMUSG00000029249	REST	4273.12	0.474792	0.15574	3.04862	0.00229895	0.0156817
ENSMUSG00000024556	ME2	3263.42	0.474499	0.115773	4.09851	4.15812e-05	0.00062083
ENSMUSG00000016087	FLI1	3663.69	0.474037	0.146454	3.23676	0.00120895	0.00957991
ENSMUSG00000014177	TVP23B	668.383	0.473898	0.155631	3.04502	0.00232668	0.0158428
ENSMUSG00000028291	AKIRIN2	1410.05	0.473605	0.108671	4.35816	1.3116e-05	0.00023797
ENSMUSG00000083396	GM15542	1615	0.473432	0.162914	2.90602	0.00366061	0.0224626
ENSMUSG00000043162	PYURF	374.054	0.472326	0.150086	3.14703	0.00164941	0.0122336
ENSMUSG00000058587	TMOD3	3354.11	0.471756	0.15214	3.10081	0.00192992	0.0138081
ENSMUSG00000028945	RHEB	1815.24	0.471114	0.156447	3.01134	0.00260101	0.017201
ENSMUSG00000040151	HS2ST1	943.317	0.470627	0.107143	4.3925	1.12054e-05	0.000209265
ENSMUSG00000056952	TATDN2	2757.63	0.470337	0.106082	4.43373	9.26182e-06	0.000179194
ENSMUSG00000025423	PIAS2	1364.41	0.468173	0.147252	3.17941	0.00147577	0.0111771
ENSMUSG00000031347	CETN2	1519.36	0.467519	0.144258	3.24085	0.00119174	0.00949861
ENSMUSG00000002699	LCP2	15611.7	0.467219	0.165765	2.81857	0.00482384	0.0278143
ENSMUSG00000074480	MEX3A	4064.01	0.467145	0.108224	4.31645	1.58557e-05	0.000279543
ENSMUSG00000042396	RBM7	3088.78	0.467043	0.130705	3.57325	0.000352577	0.00355262
ENSMUSG00000040302	RBM48	452.779	0.466738	0.151277	3.08531	0.00203337	0.0143512
ENSMUSG00000071708	SMS	2126.77	0.46606	0.149249	3.1227	0.00179201	0.0130438
ENSMUSG00000039357	FUT11	779.2	0.465752	0.132853	3.50576	0.000455306	0.00435071
ENSMUSG00000021635	RAD17	941.619	0.465633	0.17828	2.61181	0.00900654	0.0444512
ENSMUSG00000047714	PPP1R2	979.293	0.463463	0.15513	2.98759	0.00281189	0.0182615
ENSMUSG00000019087	ATP6AP1	4208.38	0.463281	0.141944	3.26382	0.00109921	0.00891395
ENSMUSG00000020311	ERLEC1	984.488	0.460641	0.142428	3.23421	0.0012198	0.00965069
ENSMUSG00000047613	A430005L14RIK	692.804	0.459391	0.161234	2.84921	0.00438273	0.0259583
ENSMUSG00000047767	ATG16L2	943.594	0.457369	0.124569	3.6716	0.000241039	0.002619
ENSMUSG00000056999	IDE	4516.15	0.45649	0.158478	2.88047	0.00397084	0.0239727
ENSMUSG00000028647	MYCBP	328.043	0.455952	0.172956	2.63623	0.00838324	0.0422573
ENSMUSG00000031146	PLP2	2216.52	0.453535	0.151231	2.99896	0.00270907	0.0177441
ENSMUSG00000031242	2610002M06RIK	1298.14	0.453036	0.172093	2.63251	0.0084757	0.0425021
ENSMUSG00000033430	TERF2IP	1244.06	0.45289	0.122784	3.6885	0.000225576	0.00248871
ENSMUSG00000068015	LRCH1	1768.15	0.452415	0.12392	3.65085	0.000261375	0.00280627
ENSMUSG00000053838	NUDCD3	4376.14	0.452213	0.0837782	5.39774	6.74847e-08	2.57369e-06
ENSMUSG00000107770	GM44126	301.124	0.451823	0.163167	2.76909	0.00562135	0.0312701
ENSMUSG00000034793	G6PC3	965.52	0.450217	0.16422	2.74154	0.00611521	0.0333804
ENSMUSG00000030096	SLC6A6	4903.82	0.450045	0.121042	3.71808	0.000200746	0.0022494
ENSMUSG00000078771	EVI2A	1175.41	0.449432	0.166962	2.69182	0.0071064	0.0373682
ENSMUSG00000036438	CALM2	10119	0.449197	0.142477	3.15277	0.00161729	0.0120578
ENSMUSG00000020642	RNF144A	2949.3	0.447733	0.164967	2.71408	0.00664605	0.0354786
ENSMUSG00000026021	SUMO1	4690.88	0.446464	0.17059	2.61718	0.00886596	0.0439339
ENSMUSG00000024539	PTPN2	2401.46	0.446451	0.147913	3.01834	0.00254163	0.0169179
ENSMUSG00000035062	ZC4H2	424.583	0.445766	0.158692	2.80901	0.00496949	0.0284349
ENSMUSG00000030766	ARHGAP17	1371.95	0.441432	0.142844	3.0903	0.00199953	0.0141728
ENSMUSG00000041426	HIBCH	754.036	0.440894	0.161893	2.72337	0.00646197	0.0347874
ENSMUSG00000036208	NEPRO	578.112	0.440051	0.125967	3.49337	0.000476957	0.00450793
ENSMUSG00000021395	SPIN1	4306.29	0.439684	0.126172	3.4848	0.000492504	0.00464168
ENSMUSG00000021451	SEMA4D	12983.8	0.437833	0.165002	2.6535	0.00796606	0.0406456
ENSMUSG00000020038	CRY1	1600.79	0.436336	0.08911	4.8966	9.7507e-07	2.62765e-05
ENSMUSG00000020472	ZKSCAN17	2539.68	0.435771	0.153089	2.84652	0.00442001	0.0260982
ENSMUSG00000050240	HIC2	605.391	0.434801	0.107819	4.03268	5.51449e-05	0.000783877
ENSMUSG00000047003	ZFP41	666.341	0.434666	0.157073	2.76729	0.0056524	0.0314124
ENSMUSG00000076432	YWHAQ	7789.61	0.433577	0.113239	3.82887	0.000128735	0.00156138
ENSMUSG00000026029	CASP8	3837.4	0.431115	0.155983	2.76385	0.00571234	0.031684
ENSMUSG00000078851	HIST3H2A	674.924	0.429899	0.148582	2.89334	0.00381173	0.0231938
ENSMUSG00000033629	HACD3	3172.69	0.429238	0.113163	3.79309	0.000148783	0.00176002
ENSMUSG00000029550	SPPL3	2764.71	0.428678	0.116066	3.69341	0.000221267	0.00244745
ENSMUSG00000041995	ZBED3	1227.14	0.428432	0.160265	2.67327	0.00751153	0.0389269
ENSMUSG00000034636	ZYG11B	4659.57	0.427803	0.154263	2.7732	0.00555081	0.0309478
ENSMUSG00000021226	ACOT2	542.777	0.427745	0.127916	3.34395	0.000825938	0.00709235
ENSMUSG00000051950	B3GLCT	397.373	0.425593	0.16281	2.61404	0.00894779	0.044212
ENSMUSG00000027668	MFN1	943.894	0.425361	0.159328	2.66972	0.0075915	0.0392488
ENSMUSG00000030691	FCHSD2	1899.65	0.425269	0.143304	2.96759	0.00300141	0.0191983
ENSMUSG00000008435	RDH13	650.198	0.424677	0.119867	3.54291	0.000395739	0.003894
ENSMUSG00000021149	GTPBP4	3771.39	0.424347	0.149791	2.83292	0.00461248	0.0268931
ENSMUSG00000021302	GGPS1	1157.88	0.423816	0.150732	2.81173	0.00492764	0.0282507
ENSMUSG00000039197	ADK	1647.57	0.423751	0.157061	2.698	0.00697581	0.0367936
ENSMUSG00000056214	PARD6G	1102.74	0.423717	0.130069	3.25763	0.00112346	0.00907204
ENSMUSG00000011427	ZFP790	875.015	0.423688	0.153085	2.76766	0.00564599	0.0313869
ENSMUSG00000029640	USP12	1498.85	0.423524	0.136504	3.10265	0.00191797	0.0137627
ENSMUSG00000033356	PUS7L	676.923	0.423384	0.163194	2.59436	0.00947664	0.0462013
ENSMUSG00000024146	CRIPT	1523.56	0.423185	0.155254	2.72576	0.00641527	0.0345793
ENSMUSG00000033793	ATP6V1H	1845.99	0.423014	0.118227	3.57797	0.000346272	0.00350133
ENSMUSG00000034430	ZXDC	1481.97	0.422205	0.143994	2.93211	0.00336673	0.0210191
ENSMUSG00000032350	GCLC	1406.73	0.421565	0.142458	2.95922	0.00308422	0.0196113
ENSMUSG00000028016	INTS12	975.82	0.421439	0.131553	3.20356	0.0013574	0.0104369
ENSMUSG00000029265	DR1	2518.06	0.420942	0.155686	2.70378	0.0068555	0.0363373
ENSMUSG00000022200	GOLPH3	4066.32	0.420047	0.144326	2.9104	0.00360963	0.0221814
ENSMUSG00000029196	TADA2B	761.05	0.419801	0.143385	2.92778	0.00341388	0.0212595
ENSMUSG00000070939	TGFBRAP1	1520.22	0.418454	0.102004	4.10235	4.08976e-05	0.000611971
ENSMUSG00000026696	VAMP4	1147.84	0.41828	0.15268	2.73959	0.00615155	0.0335091
ENSMUSG00000022707	GBE1	1030.1	0.417794	0.158422	2.63722	0.00835875	0.0421491
ENSMUSG00000027427	POLR3F	1063.57	0.416969	0.157363	2.64972	0.00805585	0.0409802
ENSMUSG00000040396	ABHD13	1470.76	0.415878	0.153586	2.70778	0.00677351	0.0359582
ENSMUSG00000049940	PGRMC2	1710.33	0.415377	0.0979303	4.24155	2.21977e-05	0.000371401
ENSMUSG00000028496	MLLT3	2973.87	0.415372	0.136522	3.04253	0.00234596	0.0159237
ENSMUSG00000026155	SMAP1	1819.65	0.415164	0.1181	3.51537	0.000439139	0.00422911
ENSMUSG00000022403	ST13	9106.37	0.415128	0.137752	3.01358	0.00258185	0.0171261
ENSMUSG00000060427	ZFP868	777.621	0.414038	0.149529	2.76896	0.00562362	0.0312726
ENSMUSG00000004771	RAB11A	1558.65	0.413849	0.129338	3.19976	0.00137543	0.0105425
ENSMUSG00000032553	SRPRB	1957.28	0.412616	0.125974	3.27542	0.00105506	0.00863729
ENSMUSG00000014837	4931428F04RIK	724.897	0.411819	0.12471	3.3022	0.000959292	0.00803302
ENSMUSG00000029012	ORC5	876.529	0.410418	0.158266	2.59323	0.00950805	0.0463151
ENSMUSG00000036167	PPHLN1	2430.46	0.409573	0.150073	2.72916	0.00634956	0.0343112
ENSMUSG00000038250	USP38	3272.89	0.408875	0.124811	3.27596	0.00105304	0.00862899
ENSMUSG00000027667	ZFP639	776.027	0.408317	0.146352	2.78996	0.00527141	0.0296689
ENSMUSG00000027865	GDAP2	785.785	0.406642	0.106178	3.82982	0.000128236	0.00155767
ENSMUSG00000022635	ZCRB1	1282.43	0.405914	0.120071	3.3806	0.00072327	0.0063503
ENSMUSG00000032633	FLCN	2050.29	0.405825	0.1144	3.54743	0.00038901	0.00383656
ENSMUSG00000036840	SIAH1A	663.112	0.405819	0.148296	2.73654	0.00620894	0.0337741
ENSMUSG00000063049	ING2	635.923	0.405012	0.134206	3.01784	0.00254587	0.0169335
ENSMUSG00000003316	GLG1	5886.94	0.403397	0.120122	3.35824	0.000784411	0.0068021
ENSMUSG00000041837	PDCD7	1032.39	0.403341	0.106636	3.78242	0.000155312	0.0018272
ENSMUSG00000027937	JTB	1310.22	0.402747	0.153155	2.62966	0.00854691	0.042747
ENSMUSG00000054381	ZFP747	636.294	0.402382	0.116027	3.46799	0.000524364	0.00488045
ENSMUSG00000050079	RSPRY1	1626.04	0.402047	0.142743	2.81658	0.00485384	0.0279404
ENSMUSG00000091337	EID1	2873.62	0.402041	0.152847	2.63035	0.00852966	0.0426855
ENSMUSG00000040331	NSMCE4A	3135.18	0.402005	0.140795	2.85525	0.00430026	0.0255755
ENSMUSG00000051124	GIMAP9	3914.02	0.401426	0.14207	2.82555	0.00471998	0.0273867
ENSMUSG00000011752	PGAM1	6779.95	0.400755	0.148606	2.69676	0.00700176	0.0369176
ENSMUSG00000021374	NUP153	6681.33	0.400189	0.154004	2.59856	0.00936157	0.0458091
ENSMUSG00000008859	RALA	1325.09	0.399659	0.150776	2.65068	0.00803295	0.040914
ENSMUSG00000024581	NAPG	1112.21	0.399618	0.124198	3.21758	0.00129276	0.0100432
ENSMUSG00000035181	HEATR5A	1559.05	0.397704	0.135316	2.93907	0.00329204	0.0206352
ENSMUSG00000025103	BTBD1	3216.73	0.396612	0.107434	3.69167	0.000222785	0.00246108
ENSMUSG00000030722	NFATC2IP	1016.34	0.396371	0.0954597	4.15223	3.29246e-05	0.000510204
ENSMUSG00000018481	APPBP2	3403.62	0.395838	0.148691	2.66215	0.00776427	0.0398881
ENSMUSG00000003812	DNASE2A	466.555	0.394751	0.130951	3.01449	0.00257408	0.0170811
ENSMUSG00000017686	RHOT1	1958.23	0.393544	0.144863	2.71666	0.00659436	0.0353453
ENSMUSG00000041712	UBR7	3422.22	0.39216	0.124845	3.14119	0.00168263	0.0124105
ENSMUSG00000021497	TXNDC15	1204.64	0.391683	0.132919	2.94677	0.00321113	0.0202387
ENSMUSG00000047466	8030462N17RIK	696.044	0.390705	0.138856	2.81374	0.00489693	0.0281226
ENSMUSG00000051351	ZFP46	1063.09	0.38994	0.14115	2.76261	0.0057342	0.0317848
ENSMUSG00000091896	UBE2D2A	6678.89	0.388482	0.115236	3.37119	0.000748447	0.00653135
ENSMUSG00000005198	POLR2A	20458.9	0.388338	0.119921	3.23828	0.00120253	0.00954915
ENSMUSG00000031959	WDR59	1151.62	0.388245	0.0983424	3.94788	7.88447e-05	0.00105208
ENSMUSG00000023075	AKIRIN1	2405.95	0.387812	0.132983	2.91626	0.00354255	0.0218464
ENSMUSG00000005299	LETM1	3611.75	0.387535	0.0972947	3.98311	6.80201e-05	0.000935208
ENSMUSG00000021264	YY1	3944.52	0.3873	0.113269	3.4193	0.00062783	0.00563382
ENSMUSG00000027808	SERP1	5943.96	0.386059	0.147487	2.61758	0.0088556	0.0439078
ENSMUSG00000050912	TMEM123	4373.81	0.384602	0.147421	2.60886	0.00908432	0.0447574
ENSMUSG00000054611	KDM2A	8867.24	0.381804	0.142631	2.67687	0.0074314	0.038628
ENSMUSG00000041028	GHITM	5706.11	0.379204	0.107337	3.53284	0.000411114	0.00401087
ENSMUSG00000009741	UBP1	2552.01	0.37918	0.135642	2.79545	0.0051828	0.0293141
ENSMUSG00000032431	CRTAP	810.286	0.378657	0.139314	2.718	0.00656771	0.0352354
ENSMUSG00000035919	BBS9	852.046	0.378463	0.105203	3.59744	0.000321362	0.00332577
ENSMUSG00000027164	TRAF6	3266.67	0.378233	0.131029	2.88665	0.00389369	0.0235981
ENSMUSG00000015619	GATA3	6978.11	0.378219	0.146708	2.57804	0.00993635	0.0479263
ENSMUSG00000047824	PYGO2	2248.6	0.377387	0.143449	2.63081	0.00851811	0.0426401
ENSMUSG00000036402	GNG12	512.109	0.375258	0.129943	2.88787	0.00387862	0.0235151
ENSMUSG00000031754	NUDT21	2967.78	0.374654	0.12924	2.8989	0.0037448	0.0228406
ENSMUSG00000026035	PPIL3	1208.61	0.37417	0.1331	2.81118	0.00493594	0.0282711
ENSMUSG00000020671	RAB10	7811.36	0.373816	0.110762	3.37495	0.000738301	0.00645263
ENSMUSG00000022792	YARS2	650.692	0.372242	0.132116	2.81755	0.00483921	0.0278936
ENSMUSG00000047379	B4GAT1	548.614	0.371533	0.118804	3.12727	0.00176438	0.0129028
ENSMUSG00000020573	PIK3CG	5606.8	0.371403	0.130122	2.85428	0.00431349	0.0256277
ENSMUSG00000030609	AEN	1769.33	0.37073	0.119624	3.09913	0.00194087	0.0138461
ENSMUSG00000045795	WHAMM	755.256	0.370183	0.105947	3.49403	0.000475794	0.00450146
ENSMUSG00000034518	HMGXB4	1621.25	0.369778	0.100899	3.66483	0.000247506	0.00267911
ENSMUSG00000041720	PI4KA	6285.62	0.368105	0.0945634	3.89268	9.91439e-05	0.0012641
ENSMUSG00000049090	ZADH2	1406.6	0.367951	0.126086	2.91826	0.0035199	0.0217699
ENSMUSG00000019795	PCMT1	2324.62	0.367744	0.120143	3.06089	0.0022068	0.0152132
ENSMUSG00000038485	SOCS7	2303.43	0.367532	0.129891	2.82954	0.00466155	0.0271087
ENSMUSG00000026280	ATG4B	1942.09	0.36634	0.136622	2.68141	0.00733121	0.038286
ENSMUSG00000033885	PXK	1521.33	0.365163	0.0990716	3.68585	0.000227939	0.00250674
ENSMUSG00000040843	TIPRL	1734.89	0.364551	0.119135	3.05999	0.00221348	0.015247
ENSMUSG00000030654	ARL6IP1	9791.21	0.364289	0.137794	2.64371	0.00820019	0.0414711
ENSMUSG00000037933	BICD2	2130.62	0.363469	0.123045	2.95396	0.00313726	0.0198793
ENSMUSG00000073725	LMBRD1	1131.43	0.362991	0.129829	2.79591	0.00517534	0.0292816
ENSMUSG00000024083	PJA2	1811.94	0.361875	0.14097	2.56703	0.0102575	0.0491036
ENSMUSG00000046441	CMTR2	633.093	0.360892	0.135938	2.65483	0.00793486	0.0405104
ENSMUSG00000055943	EMC7	1458.91	0.36046	0.104178	3.46006	0.000540064	0.00498878
ENSMUSG00000022125	CLN5	1231.53	0.36022	0.096312	3.74014	0.000183919	0.00210473
ENSMUSG00000024091	VAPA	2572.45	0.359894	0.126039	2.85541	0.00429807	0.0255714
ENSMUSG00000035399	OSER1	1675.5	0.359436	0.0972742	3.69508	0.000219821	0.00243459
ENSMUSG00000028955	VAMP3	1655.52	0.356154	0.111912	3.18246	0.0014603	0.0110843
ENSMUSG00000022201	ZFR	4247.01	0.356018	0.132887	2.6791	0.00738199	0.0384529
ENSMUSG00000079111	KDELR2	1395.78	0.355851	0.0961974	3.69918	0.000216298	0.00240643
ENSMUSG00000020659	CBLL1	1458.28	0.354327	0.126036	2.81132	0.0049339	0.0282689
ENSMUSG00000089911	MFSD14A	2191.65	0.350157	0.0949398	3.6882	0.000225843	0.00248999
ENSMUSG00000027893	AHCYL1	3705.21	0.349667	0.112527	3.1074	0.0018874	0.0135871
ENSMUSG00000024286	CCNY	3062.61	0.349269	0.105057	3.32455	0.000885601	0.00752586
ENSMUSG00000033323	CTDP1	2224.17	0.34847	0.113587	3.06787	0.00215591	0.0150067
ENSMUSG00000025464	PAOX	578.329	0.346772	0.134117	2.58558	0.00972141	0.0470877
ENSMUSG00000038949	CNST	1345.33	0.346533	0.117177	2.95734	0.00310302	0.0197017
ENSMUSG00000038116	PHF20	2301.6	0.34494	0.134146	2.57139	0.0101293	0.0485979
ENSMUSG00000033760	RBM4B	928.092	0.339972	0.111734	3.04269	0.00234475	0.0159217
ENSMUSG00000022864	D16ERTD472E	2116.24	0.338972	0.130218	2.60312	0.00923794	0.0453331
ENSMUSG00000044147	ARF6	6553.92	0.338934	0.0866202	3.91287	9.12052e-05	0.00117772
ENSMUSG00000028191	BCL10	1839.35	0.337375	0.125648	2.68509	0.0072511	0.0379085
ENSMUSG00000031400	G6PDX	2839.98	0.335854	0.129539	2.59268	0.00952314	0.0463623
ENSMUSG00000004936	MAP2K1	1953.31	0.333454	0.103159	3.23244	0.00122737	0.00968832
ENSMUSG00000021248	TMED10	7914.93	0.331463	0.0924384	3.58577	0.000336084	0.00342659
ENSMUSG00000000374	TRAPPC10	3723.6	0.331414	0.114471	2.89517	0.00378952	0.0230806
ENSMUSG00000021215	NET1	1370.16	0.330344	0.122956	2.6867	0.00721626	0.0377742
ENSMUSG00000045071	E130308A19RIK	754.128	0.330324	0.106114	3.11293	0.00185241	0.0133703
ENSMUSG00000052337	IMMT	4786.17	0.32962	0.0905989	3.63824	0.00027451	0.00291815
ENSMUSG00000032512	WDR48	3076.85	0.327674	0.0615482	5.32386	1.01588e-07	3.67854e-06
ENSMUSG00000066441	RDH11	1471.4	0.32627	0.111673	2.92165	0.00348183	0.0215733
ENSMUSG00000032437	STT3B	6923.93	0.325525	0.114871	2.83383	0.00459936	0.0268713
ENSMUSG00000039828	WDR70	990.457	0.32414	0.105838	3.0626	0.00219424	0.0151496
ENSMUSG00000021902	PHF7	569.626	0.322406	0.1125	2.86582	0.00415927	0.0249267
ENSMUSG00000024335	BRD2	15706.7	0.322344	0.105785	3.04717	0.00231008	0.0157422
ENSMUSG00000024127	PREPL	1057.4	0.320343	0.0959381	3.33906	0.000840622	0.0071791
ENSMUSG00000014426	MAP3K4	1551.01	0.320066	0.11404	2.80662	0.00500636	0.0285888
ENSMUSG00000048429	TIMM29	2958.84	0.317367	0.0935249	3.3934	0.000690308	0.00609199
ENSMUSG00000042557	SIN3A	4933.08	0.314918	0.10014	3.14477	0.00166215	0.0122945
ENSMUSG00000043998	MGAT2	2886.68	0.30269	0.105994	2.85573	0.00429386	0.0255551
ENSMUSG00000022131	GPR180	445.58	0.301182	0.11442	2.63226	0.00848195	0.042521
ENSMUSG00000056234	NCOA4	7746.61	0.30007	0.105342	2.84852	0.00439226	0.0259879
ENSMUSG00000050043	TMX2	2239.64	0.297979	0.0925875	3.21835	0.00128932	0.01003
ENSMUSG00000024758	RTN3	7357.17	0.296526	0.108638	2.72949	0.00634315	0.034303
ENSMUSG00000042305	TMEM183A	2112.14	0.292186	0.0918602	3.18077	0.00146885	0.0111363
ENSMUSG00000021877	ARF4	5010.75	0.290731	0.092339	3.14851	0.00164103	0.0121925
ENSMUSG00000031701	DNAJA2	6009.45	0.288623	0.107177	2.69296	0.00708207	0.0372789
ENSMUSG00000020349	PPP2CA	11776.4	0.287746	0.0965873	2.97913	0.00289065	0.0186564
ENSMUSG00000024841	EIF1AD	2957.45	0.284821	0.0988877	2.88024	0.00397368	0.0239731
ENSMUSG00000006932	CTNNB1	11087.8	0.283945	0.0920031	3.08626	0.00202693	0.0143293
ENSMUSG00000020986	SEC23A	1496.4	0.275882	0.104168	2.64843	0.00808676	0.0410787
ENSMUSG00000057101	ZFP180	1368.79	0.27283	0.0968993	2.81561	0.00486853	0.0279969
ENSMUSG00000075000	NRBF2	1026.1	0.26995	0.100872	2.67617	0.00744699	0.038674
ENSMUSG00000025024	SMNDC1	2321.77	0.260555	0.0856212	3.04311	0.00234146	0.0159057
ENSMUSG00000026634	ANGEL2	2724.41	0.250762	0.079162	3.1677	0.00153649	0.011586
ENSMUSG00000049657	ZBTB5	1274.45	0.250724	0.0967351	2.59187	0.0095457	0.0464196
ENSMUSG00000033096	APMAP	1214.96	0.249488	0.0961849	2.59384	0.00949115	0.0462458
ENSMUSG00000037174	ELF2	3826.8	0.247731	0.0931305	2.66004	0.00781315	0.0400104
ENSMUSG00000019518	AP4M1	1093.33	0.244468	0.0917681	2.66398	0.0077223	0.0397013
ENSMUSG00000027282	MTCH2	2091.68	0.244317	0.087129	2.80408	0.00504609	0.0287583
ENSMUSG00000028567	TXNDC12	1618.81	0.243046	0.0947738	2.56449	0.0103329	0.049423
ENSMUSG00000042506	USP22	6245.25	0.227994	0.0722327	3.15638	0.0015974	0.0119662
ENSMUSG00000050627	GPD1L	2823.17	0.22701	0.0874632	2.59549	0.00944561	0.046113
ENSMUSG00000030738	EIF3C	15830.5	0.220717	0.0833544	2.64793	0.00809854	0.0411034
ENSMUSG00000038848	YTHDF1	3717.81	0.187911	0.0601437	3.12436	0.00178192	0.0129868
ENSMUSG00000015120	UBE2I	8362.93	-0.195812	0.0558757	-3.50442	0.00045761	0.00436302
ENSMUSG00000043962	THRAP3	14847	-0.197176	0.075077	-2.62632	0.00863134	0.0430566
ENSMUSG00000035949	FBXW2	2229.83	-0.214946	0.0800043	-2.68668	0.00721662	0.0377742
ENSMUSG00000024271	ELP2	3993.38	-0.223864	0.081503	-2.7467	0.00601989	0.0330172
ENSMUSG00000027411	VPS16	2365.62	-0.225682	0.0797231	-2.83083	0.00464277	0.0270331
ENSMUSG00000063808	GPATCH1	946.012	-0.231146	0.0873507	-2.64618	0.00814063	0.0412548
ENSMUSG00000039354	SMARCAL1	1895.02	-0.232246	0.0841568	-2.75969	0.00578566	0.0320185
ENSMUSG00000050379	2006-09-01	13592.6	-0.239623	0.0897567	-2.6697	0.0075919	0.0392488
ENSMUSG00000001847	RAC1	9070.16	-0.242908	0.0888736	-2.73319	0.00627242	0.0339904
ENSMUSG00000031575	ASH2L	3076.9	-0.243765	0.0891089	-2.73559	0.00622689	0.0338183
ENSMUSG00000014763	FAM120B	1499.76	-0.244085	0.092719	-2.63252	0.00847541	0.0425021
ENSMUSG00000005882	UQCC1	1100.39	-0.250985	0.0959759	-2.61508	0.00892063	0.0441285
ENSMUSG00000038685	RTEL1	1198.24	-0.256637	0.094084	-2.72774	0.00637694	0.0344159
ENSMUSG00000029125	STX18	810.102	-0.259907	0.0863135	-3.0112	0.00260214	0.017201
ENSMUSG00000046032	SNX12	1305.72	-0.26063	0.0870672	-2.99344	0.00275856	0.0179793
ENSMUSG00000027651	RPRD1B	2179.53	-0.260975	0.0953398	-2.73731	0.0061943	0.0337158
ENSMUSG00000058655	EIF4B	29856	-0.262114	0.0979103	-2.67708	0.00742661	0.0386265
ENSMUSG00000042369	RBM45	1568.41	-0.265728	0.0855958	-3.10445	0.00190633	0.0136905
ENSMUSG00000030286	EMC3	3015.36	-0.267525	0.0777416	-3.44122	0.000579108	0.00528978
ENSMUSG00000001138	CNNM3	1375.68	-0.273149	0.100777	-2.71043	0.00671955	0.0357821
ENSMUSG00000026254	EIF4E2	3446.48	-0.274798	0.101643	-2.70355	0.00686025	0.0363513
ENSMUSG00000024589	NEDD4L	1836.24	-0.277548	0.101039	-2.74692	0.00601571	0.0330154
ENSMUSG00000089715	CBX6	4930.76	-0.279545	0.104403	-2.67755	0.00741634	0.0385847
ENSMUSG00000028629	EXO5	1034.18	-0.280293	0.0989015	-2.83406	0.00459607	0.0268612
ENSMUSG00000034432	COPS8	1886.5	-0.280788	0.107128	-2.62104	0.00876623	0.0435904
ENSMUSG00000033444	SPECC1L	3750	-0.283856	0.104377	-2.71954	0.00653735	0.0351273
ENSMUSG00000044148	1810030O07RIK	1878.73	-0.284061	0.0982136	-2.89228	0.00382461	0.023245
ENSMUSG00000024668	SDHAF2	1689.82	-0.284495	0.0991283	-2.86997	0.00410514	0.0246538
ENSMUSG00000057572	ZBTB8OS	1264.21	-0.284594	0.0936505	-3.0389	0.00237447	0.0160538
ENSMUSG00000042709	ATPAF2	1166.97	-0.284678	0.10144	-2.80637	0.00501038	0.0286022
ENSMUSG00000022771	PPIL2	4822.97	-0.289825	0.112103	-2.58535	0.0097281	0.0471068
ENSMUSG00000015971	ACTR8	1328.63	-0.291366	0.0929029	-3.13624	0.00171127	0.0125947
ENSMUSG00000029404	ARL6IP4	2055.07	-0.291752	0.102678	-2.84142	0.00449131	0.0264194
ENSMUSG00000029387	GTF2H3	1647.28	-0.291887	0.101594	-2.87307	0.00406499	0.0244553
ENSMUSG00000047045	TMEM164	3578.27	-0.29403	0.1033	-2.84637	0.00442207	0.0261015
ENSMUSG00000015478	RNF5	1292.93	-0.296381	0.101798	-2.91145	0.00359752	0.0221307
ENSMUSG00000038957	EDC3	2985.5	-0.297308	0.0988114	-3.00884	0.00262245	0.017282
ENSMUSG00000061288	TAOK3	4115.11	-0.298584	0.108341	-2.75596	0.00585195	0.0323021
ENSMUSG00000044066	CEP68	2080.68	-0.302487	0.102065	-2.96366	0.00304002	0.0193804
ENSMUSG00000043384	GPRASP1	1329.84	-0.302659	0.115006	-2.63167	0.00849656	0.0425447
ENSMUSG00000017679	TTPAL	2644.3	-0.310319	0.120516	-2.57493	0.010026	0.0482432
ENSMUSG00000029454	MAPKAPK5	1270.57	-0.311023	0.0741768	-4.19299	2.75304e-05	0.000441799
ENSMUSG00000106864	GTF3C2	3591	-0.311052	0.0903248	-3.44371	0.000573799	0.00524965
ENSMUSG00000026554	DCAF8	6941.33	-0.311867	0.115582	-2.69822	0.00697113	0.0367936
ENSMUSG00000020755	SAP30BP	2399.82	-0.312486	0.118933	-2.62741	0.00860366	0.0429558
ENSMUSG00000037353	LETMD1	1918.72	-0.313321	0.107043	-2.92706	0.00342186	0.0212966
ENSMUSG00000025607	COPG2	2144.03	-0.314317	0.116438	-2.69943	0.00694573	0.0366799
ENSMUSG00000005682	PAN2	1687.84	-0.317441	0.110004	-2.88571	0.00390529	0.0236435
ENSMUSG00000003068	STK11	4105.44	-0.321717	0.115125	-2.7945	0.00519808	0.0293908
ENSMUSG00000020946	GOSR2	4598.15	-0.322395	0.0933138	-3.45496	0.000550379	0.00507045
ENSMUSG00000019808	ADAT2	273.672	-0.323199	0.12545	-2.57631	0.00998619	0.048133
ENSMUSG00000061032	RRP1	10007.3	-0.325483	0.100814	-3.22855	0.0012442	0.0097942
ENSMUSG00000039989	CBX4	4763.31	-0.325553	0.12123	-2.68541	0.00724399	0.0378943
ENSMUSG00000031985	GNPAT	3642.41	-0.326934	0.0758592	-4.30975	1.63441e-05	0.000286271
ENSMUSG00000071454	DTNB	1137.83	-0.327	0.116728	-2.80138	0.0050884	0.0289037
ENSMUSG00000092558	MED20	1457.37	-0.327593	0.0828361	-3.95471	7.66277e-05	0.00102969
ENSMUSG00000046806	3110062M04RIK	499.363	-0.32857	0.107997	-3.04239	0.0023471	0.0159251
ENSMUSG00000032498	MLH1	896.769	-0.329218	0.112976	-2.91405	0.00356768	0.0219707
ENSMUSG00000037134	PRMT9	1053.22	-0.330581	0.108576	-3.04468	0.00232925	0.0158503
ENSMUSG00000070000	FCHO1	6432.3	-0.330885	0.120781	-2.73955	0.00615243	0.0335091
ENSMUSG00000025373	RNF41	1739.75	-0.330947	0.109597	-3.01968	0.00253044	0.0168566
ENSMUSG00000020956	DTD2	424.609	-0.331101	0.124473	-2.66002	0.00781366	0.0400104
ENSMUSG00000014748	TEX261	3469.85	-0.33161	0.0909844	-3.64469	0.000267711	0.00285985
ENSMUSG00000021646	MCCC2	602.575	-0.333007	0.127785	-2.606	0.00916057	0.0450563
ENSMUSG00000026617	BPNT1	449.446	-0.334656	0.121559	-2.75304	0.00590453	0.032561
ENSMUSG00000025722	WDR73	1358.69	-0.336126	0.127106	-2.64445	0.00818244	0.0414179
ENSMUSG00000068742	CRY2	718.395	-0.336668	0.128511	-2.61977	0.00879901	0.0437155
ENSMUSG00000038619	ENSA	3359.43	-0.337657	0.106989	-3.15599	0.00159955	0.0119722
ENSMUSG00000078619	SMARCD2	12109.9	-0.338285	0.13051	-2.59203	0.00954125	0.0464111
ENSMUSG00000022685	PARN	2385.74	-0.33887	0.0940219	-3.60416	0.000313166	0.00326254
ENSMUSG00000038025	PHF2	6369.04	-0.340055	0.112543	-3.02154	0.00251488	0.0167919
ENSMUSG00000026127	IMP4	2978.89	-0.340512	0.130439	-2.61051	0.00904085	0.044595
ENSMUSG00000025474	TUBGCP2	2276.33	-0.341819	0.120035	-2.84766	0.00440423	0.0260318
ENSMUSG00000011257	PABPC4	4802.18	-0.342782	0.0943294	-3.63389	0.000279183	0.00296051
ENSMUSG00000024983	VTI1A	999.417	-0.34301	0.0999921	-3.43038	0.000602747	0.00547301
ENSMUSG00000060739	NSA2	9123.29	-0.344278	0.11612	-2.96485	0.00302833	0.0193274
ENSMUSG00000020523	FAM114A2	1980.45	-0.344693	0.0789612	-4.36535	1.26922e-05	0.000231827
ENSMUSG00000030881	ARFIP2	1545.31	-0.345317	0.131591	-2.62416	0.00868626	0.0432678
ENSMUSG00000030602	PAK4	1003.16	-0.346489	0.131862	-2.62766	0.00859756	0.0429379
ENSMUSG00000049489	FAM58B	765.376	-0.346852	0.121918	-2.84495	0.00444183	0.0261821
ENSMUSG00000013465	NELFB	3452.17	-0.347157	0.121316	-2.86159	0.00421517	0.0252177
ENSMUSG00000012609	TTLL5	1147.02	-0.3475	0.129418	-2.68511	0.00725067	0.0379085
ENSMUSG00000022721	TRMT2A	2018.39	-0.347723	0.13085	-2.65743	0.00787398	0.0402713
ENSMUSG00000023994	NFYA	3122.66	-0.348206	0.115497	-3.01485	0.00257102	0.0170674
ENSMUSG00000005150	WDR83	746.572	-0.348347	0.0871632	-3.99649	6.42886e-05	0.000893185
ENSMUSG00000024981	ACSL5	5024.73	-0.348439	0.122871	-2.83582	0.00457086	0.0267805
ENSMUSG00000029192	TBC1D14	2270	-0.348618	0.0967125	-3.60468	0.000312537	0.00325796
ENSMUSG00000017801	MLX	1821.72	-0.350256	0.129274	-2.70941	0.00674039	0.0358426
ENSMUSG00000037761	ACTR5	801.638	-0.352884	0.11311	-3.11984	0.00180951	0.0131323
ENSMUSG00000037523	MAVS	1269.88	-0.35326	0.129894	-2.7196	0.00653608	0.0351273
ENSMUSG00000012117	DHDDS	2318.87	-0.353789	0.113365	-3.12079	0.00180365	0.0131119
ENSMUSG00000026470	STX6	2096.41	-0.35663	0.134677	-2.64803	0.00809614	0.0411034
ENSMUSG00000026277	STK25	2262.62	-0.356913	0.133542	-2.67266	0.00752521	0.0389508
ENSMUSG00000016940	KCTD2	1247.7	-0.357328	0.138558	-2.57891	0.00991133	0.0478459
ENSMUSG00000027198	EXT2	3174.62	-0.358015	0.13586	-2.63518	0.00840928	0.0422923
ENSMUSG00000029993	NFU1	1264.34	-0.360285	0.107288	-3.35813	0.000784726	0.0068021
ENSMUSG00000039382	WDR45	1193.86	-0.360299	0.11862	-3.03742	0.00238611	0.0160819
ENSMUSG00000067567	HDAC8	553.828	-0.360941	0.110559	-3.26468	0.00109589	0.00889116
ENSMUSG00000039069	MTG2	705.553	-0.361625	0.137989	-2.62069	0.00877532	0.043623
ENSMUSG00000013495	TMEM175	733.104	-0.362623	0.109556	-3.30994	0.000933165	0.00784862
ENSMUSG00000019923	ZWINT	2506.89	-0.36319	0.0811312	-4.47657	7.58511e-06	0.000152589
ENSMUSG00000029621	ARPC1A	2986.39	-0.363468	0.110512	-3.28893	0.00100567	0.0083362
ENSMUSG00000021996	ESD	2914.92	-0.363706	0.122661	-2.96514	0.00302548	0.0193164
ENSMUSG00000052406	REXO4	1986.07	-0.364433	0.0838937	-4.34398	1.39922e-05	0.000251726
ENSMUSG00000006058	SNF8	1487.87	-0.365816	0.104353	-3.50558	0.000455609	0.00435118
ENSMUSG00000018143	MAFK	2466.27	-0.366625	0.141169	-2.59706	0.00940262	0.0459446
ENSMUSG00000070953	RABEPK	812.375	-0.367813	0.121099	-3.03729	0.00238716	0.0160827
ENSMUSG00000025381	CNPY2	3003.91	-0.367944	0.139675	-2.63429	0.00843142	0.0423541
ENSMUSG00000015488	CACFD1	1407.49	-0.368065	0.118019	-3.11868	0.00181663	0.0131618
ENSMUSG00000068114	CCDC134	716.32	-0.369104	0.125182	-2.94854	0.00319274	0.020145
ENSMUSG00000040795	IQCC	820.148	-0.369336	0.0918742	-4.02001	5.81949e-05	0.000817771
ENSMUSG00000063888	RPL7L1	3409.57	-0.36938	0.0853912	-4.32574	1.52023e-05	0.000270278
ENSMUSG00000063236	1110038F14RIK	869.446	-0.369662	0.130411	-2.83458	0.00458853	0.0268444
ENSMUSG00000027255	ARFGAP2	4382.78	-0.369853	0.126093	-2.93317	0.00335519	0.0209547
ENSMUSG00000026273	MTERF4	551.543	-0.370357	0.111784	-3.31316	0.000922496	0.00778936
ENSMUSG00000026926	PMPCA	3528.75	-0.370915	0.102334	-3.62453	0.000289485	0.00305469
ENSMUSG00000031402	MPP1	5361.38	-0.371871	0.08602	-4.32308	1.53864e-05	0.00027199
ENSMUSG00000058558	RPL5	2029.29	-0.372557	0.13937	-2.67315	0.00751421	0.0389291
ENSMUSG00000036270	EDC4	3489.83	-0.372688	0.135932	-2.74172	0.0061118	0.0333724
ENSMUSG00000033106	SLC7A6OS	955.425	-0.372836	0.0914338	-4.07766	4.54913e-05	0.000665915
ENSMUSG00000028797	TMEM234	3550.39	-0.377248	0.119184	-3.16527	0.00154941	0.011663
ENSMUSG00000062762	EI24	1673.4	-0.377696	0.122683	-3.07864	0.00207949	0.0146038
ENSMUSG00000031065	CDK16	1788.21	-0.378117	0.137778	-2.74439	0.00606239	0.0331975
ENSMUSG00000056167	CNOT10	2672.38	-0.378579	0.0846331	-4.47318	7.7065e-06	0.000154309
ENSMUSG00000048307	ANKRD46	1865.33	-0.38007	0.0793264	-4.79122	1.65773e-06	4.19308e-05
ENSMUSG00000049588	CCDC69	607.574	-0.380307	0.148335	-2.56385	0.0103518	0.0495001
ENSMUSG00000024422	DHX16	3320.49	-0.380444	0.103606	-3.67203	0.000240635	0.00261792
ENSMUSG00000038290	SMG6	3862.49	-0.381664	0.116484	-3.27653	0.00105091	0.00861902
ENSMUSG00000025495	PTDSS2	689.486	-0.381917	0.140704	-2.71434	0.00664079	0.0354615
ENSMUSG00000006705	PKNOX1	2161.37	-0.382967	0.114516	-3.34421	0.00082516	0.00709235
ENSMUSG00000026812	TSC1	1465.39	-0.383611	0.128894	-2.97617	0.00291875	0.0187954
ENSMUSG00000002871	TPRA1	914.637	-0.385011	0.140998	-2.73061	0.00632182	0.0342473
ENSMUSG00000019849	PREP	3310.46	-0.385667	0.131349	-2.9362	0.00332261	0.0207827
ENSMUSG00000025036	SFXN2	608.397	-0.386912	0.142507	-2.71504	0.00662683	0.0354306
ENSMUSG00000058638	ZFP110	1306.87	-0.387275	0.125819	-3.07803	0.00208376	0.0146088
ENSMUSG00000024949	SF1	13758.2	-0.387396	0.143657	-2.69667	0.00700361	0.0369176
ENSMUSG00000068917	CLK2	1798.92	-0.387968	0.144806	-2.67922	0.00737943	0.0384529
ENSMUSG00000007564	PPP2R1A	8875.54	-0.389114	0.146653	-2.6533	0.00797083	0.0406579
ENSMUSG00000048497	MMGT2	883.572	-0.389885	0.0987708	-3.94737	7.90141e-05	0.00105352
ENSMUSG00000057506	BLOC1S2	987.445	-0.390827	0.102704	-3.80537	0.000141591	0.00168655
ENSMUSG00000008373	PRPF31	3175.67	-0.391258	0.144226	-2.71282	0.0066713	0.0355913
ENSMUSG00000026942	TRAF2	1741.46	-0.391364	0.146848	-2.66509	0.00769671	0.0396239
ENSMUSG00000034867	ANKRD27	3087.54	-0.391708	0.109128	-3.58943	0.000331402	0.00338889
ENSMUSG00000056820	TSNAX	2903.73	-0.393071	0.0649667	-6.05035	1.44533e-09	8.94236e-08
ENSMUSG00000033530	TTC7B	1476.78	-0.393201	0.131687	-2.98588	0.00282761	0.018331
ENSMUSG00000028886	EYA3	2785.31	-0.394241	0.100521	-3.92198	8.78238e-05	0.00114437
ENSMUSG00000049751	RPL36AL	7894.16	-0.394577	0.151191	-2.6098	0.00905964	0.044662
ENSMUSG00000030960	METTL10	535.106	-0.39524	0.149369	-2.64606	0.00814346	0.041257
ENSMUSG00000058586	SERHL	706.859	-0.395573	0.120833	-3.27372	0.00106141	0.00867278
ENSMUSG00000054836	ELP6	381.411	-0.396452	0.130467	-3.03871	0.00237594	0.0160538
ENSMUSG00000058076	SDHC	3258.79	-0.398276	0.140989	-2.82487	0.00473005	0.0274021
ENSMUSG00000016520	LNX2	1395.35	-0.398853	0.147048	-2.71239	0.00667997	0.0356265
ENSMUSG00000026578	CCDC181	354.948	-0.399859	0.135783	-2.94483	0.00323129	0.0203219
ENSMUSG00000033940	BRK1	4181.78	-0.400003	0.113005	-3.5397	0.000400585	0.00392479
ENSMUSG00000028245	NSMAF	2584.58	-0.400406	0.140581	-2.84823	0.00439632	0.026003
ENSMUSG00000042787	EXOG	599.212	-0.400686	0.107548	-3.72566	0.000194807	0.0022009
ENSMUSG00000037260	HGSNAT	756.216	-0.401596	0.134539	-2.98498	0.002836	0.0183657
ENSMUSG00000034032	RPAP1	1739.1	-0.401726	0.145273	-2.76532	0.0056867	0.0315622
ENSMUSG00000037085	TRMT12	315.418	-0.401949	0.121482	-3.30871	0.000937265	0.00786772
ENSMUSG00000034194	R3HCC1	1102.92	-0.402054	0.141231	-2.84679	0.00441624	0.0260849
ENSMUSG00000030816	RNF40	3987.76	-0.402761	0.141089	-2.85465	0.00430838	0.0256061
ENSMUSG00000002550	UCK1	2287.34	-0.402879	0.124292	-3.24139	0.00118949	0.00948502
ENSMUSG00000026600	SOAT1	2440.43	-0.403436	0.151578	-2.66158	0.00777756	0.0399206
ENSMUSG00000005936	KCTD20	4040.8	-0.404167	0.0820467	-4.92606	8.39056e-07	2.30539e-05
ENSMUSG00000007610	GTPBP3	722.287	-0.404662	0.131582	-3.07537	0.00210243	0.014694
ENSMUSG00000031792	USB1	1370.16	-0.404858	0.152792	-2.64973	0.0080557	0.0409802
ENSMUSG00000025421	HDHD2	916.69	-0.405753	0.077061	-5.26534	1.3993e-07	4.82325e-06
ENSMUSG00000016503	GTF3A	2713.57	-0.406877	0.137413	-2.96098	0.00306659	0.0195209
ENSMUSG00000023186	VWA5A	1659.33	-0.407017	0.126682	-3.21289	0.00131405	0.0101626
ENSMUSG00000003037	RAB8A	5380.36	-0.407266	0.126165	-3.22803	0.00124646	0.00979437
ENSMUSG00000040848	SFT2D2	3965.49	-0.407658	0.135845	-3.0009	0.00269179	0.0176578
ENSMUSG00000028936	RPL22	14968.1	-0.407875	0.146581	-2.78258	0.00539281	0.0302138
ENSMUSG00000006392	MED8	1108.59	-0.407917	0.0963771	-4.2325	2.31104e-05	0.000384056
ENSMUSG00000019362	D8ERTD738E	2229.8	-0.408577	0.154251	-2.64878	0.00807836	0.0410481
ENSMUSG00000013997	NIT1	1253.82	-0.408718	0.120435	-3.39367	0.000689618	0.00608903
ENSMUSG00000061474	MRPS36	1042.62	-0.409342	0.144869	-2.82559	0.00471932	0.0273867
ENSMUSG00000034709	PPP1R21	1696.45	-0.40958	0.112607	-3.63726	0.00027555	0.00292559
ENSMUSG00000034343	UBE2F	1418.31	-0.409775	0.118358	-3.46218	0.000535828	0.00496239
ENSMUSG00000004207	PSAP	21537.8	-0.410571	0.151202	-2.71537	0.00662015	0.0354173
ENSMUSG00000036819	JMJD4	919.4	-0.4111	0.106842	-3.84774	0.000119211	0.00146879
ENSMUSG00000031349	NSDHL	847.946	-0.412349	0.138104	-2.98578	0.00282852	0.018331
ENSMUSG00000024830	RPS6KB2	828.567	-0.412491	0.150096	-2.74819	0.00599253	0.0329142
ENSMUSG00000028684	UROD	2042.24	-0.412852	0.155522	-2.65462	0.00793987	0.040524
ENSMUSG00000049287	IBA57	566.896	-0.413242	0.136001	-3.03851	0.0023775	0.0160538
ENSMUSG00000035392	DENND1A	1743.72	-0.413262	0.144268	-2.86455	0.00417608	0.02501
ENSMUSG00000019710	MRPL24	3769.74	-0.413487	0.131267	-3.14997	0.00163287	0.0121467
ENSMUSG00000026389	STEAP3	876.936	-0.413547	0.159828	-2.58745	0.00966888	0.046886
ENSMUSG00000040112	MRPS35	1113.97	-0.413603	0.12089	-3.42132	0.000623174	0.00560011
ENSMUSG00000027466	RBCK1	6179.06	-0.414572	0.138669	-2.98964	0.00279303	0.0181626
ENSMUSG00000029030	TPRGL	4045.21	-0.415226	0.1545	-2.68754	0.00719807	0.0377345
ENSMUSG00000068391	CHRAC1	978.875	-0.415671	0.147257	-2.82275	0.00476136	0.0275557
ENSMUSG00000038696	MAPKAP1	1944.09	-0.416197	0.0930231	-4.47413	7.67248e-06	0.000153885
ENSMUSG00000021144	MTA1	6720.86	-0.41676	0.134728	-3.09334	0.00197915	0.0140609
ENSMUSG00000032295	MAN2C1	1610.6	-0.417004	0.148264	-2.81258	0.00491458	0.0282011
ENSMUSG00000034931	DHX8	4465.01	-0.41723	0.104719	-3.9843	6.76805e-05	0.000931284
ENSMUSG00000063904	DPP3	4159.67	-0.417546	0.149521	-2.79256	0.0052293	0.0295164
ENSMUSG00000027751	SUPT20	2171.22	-0.41774	0.16003	-2.61039	0.00904382	0.0445968
ENSMUSG00000032478	NME6	392.947	-0.418115	0.157668	-2.65186	0.00800498	0.0407837
ENSMUSG00000051238	SWSAP1	398.123	-0.418544	0.141501	-2.9579	0.00309747	0.0196787
ENSMUSG00000011158	BRF1	2033.44	-0.418872	0.0769675	-5.44218	5.26311e-08	2.07152e-06
ENSMUSG00000017288	VPS53	2055.42	-0.41921	0.109406	-3.8317	0.000127259	0.00155019
ENSMUSG00000086583	GM15500	47036	-0.419986	0.138567	-3.03092	0.00243812	0.0163684
ENSMUSG00000026142	RHBDD1	696.657	-0.420346	0.161958	-2.5954	0.0094482	0.046113
ENSMUSG00000029524	SIRT4	221.129	-0.420872	0.135963	-3.09549	0.00196487	0.0139825
ENSMUSG00000028898	TRNAU1AP	904.218	-0.421218	0.148537	-2.83578	0.00457137	0.0267805
ENSMUSG00000037669	LDAH	1309.69	-0.421296	0.0736075	-5.72355	1.04324e-08	5.04036e-07
ENSMUSG00000003500	IMPDH1	6382.61	-0.42154	0.164305	-2.5656	0.0102998	0.0492787
ENSMUSG00000054715	ZSCAN22	814.725	-0.422927	0.130232	-3.24748	0.0011643	0.00931443
ENSMUSG00000062761	ZFP512	1398.67	-0.423012	0.0951283	-4.44675	8.71779e-06	0.000169814
ENSMUSG00000031691	TNPO2	3635.11	-0.423293	0.10741	-3.94091	8.1172e-05	0.00107562
ENSMUSG00000052369	TMEM106C	1197.98	-0.423403	0.136794	-3.09518	0.00196693	0.0139914
ENSMUSG00000047731	WBP1L	3569.4	-0.423545	0.157959	-2.68137	0.00733222	0.038286
ENSMUSG00000026927	SDCCAG3	1987.68	-0.42428	0.10998	-3.85781	0.00011441	0.0014198
ENSMUSG00000033985	TESK2	226.349	-0.424327	0.150788	-2.81406	0.004892	0.0281036
ENSMUSG00000040725	HNRNPUL1	17298.3	-0.425056	0.100658	-4.22278	2.41308e-05	0.000397938
ENSMUSG00000029068	CCNL2	2775.6	-0.425393	0.150214	-2.83192	0.00462692	0.0269499
ENSMUSG00000035051	DHX57	1342.49	-0.425463	0.142299	-2.98992	0.00279053	0.0181616
ENSMUSG00000034007	SCAPER	721.11	-0.425675	0.162053	-2.62676	0.00862013	0.0430256
ENSMUSG00000058388	PHTF1	2097.54	-0.426331	0.13125	-3.24823	0.00116127	0.0092988
ENSMUSG00000021140	PCNX	4299.65	-0.426932	0.156413	-2.72953	0.00634251	0.034303
ENSMUSG00000013822	ELOF1	1433.65	-0.427245	0.157398	-2.71442	0.00663929	0.0354615
ENSMUSG00000029538	SRSF9	1881.88	-0.42919	0.105439	-4.07052	4.69074e-05	0.000684315
ENSMUSG00000021686	AP3B1	4166.42	-0.429364	0.0972072	-4.41699	1.00084e-05	0.000190404
ENSMUSG00000028857	TMEM222	1967.27	-0.430151	0.138785	-3.09941	0.00193904	0.0138445
ENSMUSG00000024767	OTUB1	3435.1	-0.430478	0.147566	-2.91719	0.003532	0.0218164
ENSMUSG00000029165	AGBL5	1692.26	-0.430684	0.111556	-3.8607	0.000113063	0.00140511
ENSMUSG00000028398	TMEM261	1509.9	-0.431011	0.146758	-2.93688	0.00331534	0.0207586
ENSMUSG00000038398	UPF3A	1100.88	-0.431455	0.0904117	-4.77211	1.82304e-06	4.53565e-05
ENSMUSG00000022677	FOPNL	1586.11	-0.431793	0.0994764	-4.34065	1.42061e-05	0.000254526
ENSMUSG00000017188	COA3	1235.03	-0.432312	0.144917	-2.98317	0.00285284	0.0184608
ENSMUSG00000020265	SUMO3	5482.64	-0.432769	0.136889	-3.16147	0.00156977	0.0117889
ENSMUSG00000003184	IRF3	2656.75	-0.432985	0.129022	-3.3559	0.000791073	0.00683741
ENSMUSG00000022216	PSME1	9724.45	-0.433542	0.145057	-2.98877	0.00280099	0.0182075
ENSMUSG00000051149	ADNP	2438.9	-0.434205	0.157636	-2.75449	0.0058784	0.0324377
ENSMUSG00000001999	BLVRA	565.023	-0.435048	0.134313	-3.23907	0.00119922	0.0095361
ENSMUSG00000098274	RPL24	14433.9	-0.435386	0.159198	-2.73488	0.00624033	0.0338699
ENSMUSG00000025583	RPTOR	3176.88	-0.436325	0.124115	-3.5155	0.000438934	0.00422911
ENSMUSG00000032305	FAM219B	750.724	-0.436657	0.108548	-4.0227	5.75355e-05	0.000810658
ENSMUSG00000027166	DNAJC24	295.773	-0.436696	0.155269	-2.81252	0.00491551	0.0282011
ENSMUSG00000078429	CTDSP2	8598.18	-0.436891	0.15329	-2.8501	0.0043705	0.0258948
ENSMUSG00000022386	TRMU	376.27	-0.437399	0.134122	-3.26121	0.00110938	0.00898365
ENSMUSG00000079605	ZBTB9	1751.01	-0.438136	0.133669	-3.27777	0.00104631	0.00859043
ENSMUSG00000062352	ITGB1BP1	1078.56	-0.438528	0.141253	-3.10457	0.00190558	0.0136905
ENSMUSG00000036975	TMEM177	385.799	-0.438594	0.140818	-3.11462	0.00184183	0.0133051
ENSMUSG00000052085	DOCK8	13172.9	-0.439134	0.143204	-3.06649	0.00216589	0.0150579
ENSMUSG00000029577	UBE3B	5035.29	-0.440156	0.123667	-3.55922	0.000371958	0.00369381
ENSMUSG00000036644	TBC1D9B	9664.35	-0.441368	0.150363	-2.93536	0.00333166	0.0208229
ENSMUSG00000054455	VAPB	1860.11	-0.441523	0.10928	-4.04028	5.33868e-05	0.00076585
ENSMUSG00000026181	PPM1F	3699.62	-0.441653	0.122031	-3.61919	0.000295524	0.00310698
ENSMUSG00000030225	DERA	1643.08	-0.442459	0.130687	-3.38565	0.000710106	0.00625068
ENSMUSG00000079197	PSME2	4981.83	-0.442522	0.1469	-3.0124	0.0025919	0.0171861
ENSMUSG00000030697	PPP4C	5505.29	-0.443502	0.137989	-3.21404	0.0013088	0.0101266
ENSMUSG00000043866	TAF10	3216.37	-0.443884	0.157317	-2.8216	0.00477847	0.0276318
ENSMUSG00000029433	DIABLO	2385.52	-0.444411	0.119454	-3.72036	0.000198943	0.00223502
ENSMUSG00000014551	MRPS25	927.936	-0.444839	0.125942	-3.5321	0.00041228	0.00401314
ENSMUSG00000049957	CCDC137	1008.95	-0.444959	0.112486	-3.95567	7.632e-05	0.00102715
ENSMUSG00000034544	RSRC1	997.311	-0.444977	0.125693	-3.54018	0.000399856	0.00392328
ENSMUSG00000034613	PPM1H	6382.63	-0.445013	0.169437	-2.62641	0.00862901	0.0430566
ENSMUSG00000030435	U2AF2	12426.1	-0.445197	0.128668	-3.46006	0.000540059	0.00498878
ENSMUSG00000061650	MED9	761.552	-0.44563	0.143319	-3.10936	0.00187495	0.0135103
ENSMUSG00000035674	NDUFA3	2254.01	-0.445726	0.171152	-2.60427	0.00920699	0.0452458
ENSMUSG00000037410	TBC1D2B	3973.17	-0.446242	0.168762	-2.64422	0.00818804	0.0414219
ENSMUSG00000011884	GLTP	4572.91	-0.447579	0.145835	-3.06908	0.00214721	0.0149583
ENSMUSG00000035048	ANAPC13	833.987	-0.448648	0.165188	-2.71598	0.00660791	0.0353944
ENSMUSG00000000486	2001-09-01	17715.2	-0.449174	0.170203	-2.63905	0.00831391	0.0419621
ENSMUSG00000010142	TNFRSF13B	1758.16	-0.449584	0.138366	-3.24924	0.00115715	0.00927014
ENSMUSG00000003234	ABCF3	1905.98	-0.449792	0.123415	-3.64455	0.000267861	0.00285985
ENSMUSG00000020901	PIK3R5	3422.05	-0.450026	0.172779	-2.60464	0.00919714	0.0452103
ENSMUSG00000031930	WWP2	4035.41	-0.45011	0.139934	-3.21659	0.00129725	0.0100573
ENSMUSG00000021193	PITRM1	4018.9	-0.450354	0.160929	-2.79847	0.00513451	0.029108
ENSMUSG00000029642	POLR1D	3636.25	-0.450427	0.130903	-3.44091	0.000579765	0.00529297
ENSMUSG00000005469	PRKACA	2898.25	-0.45043	0.144675	-3.11338	0.00184955	0.0133553
ENSMUSG00000027679	DNAJC19	866.593	-0.451003	0.146548	-3.07751	0.00208736	0.0146243
ENSMUSG00000027475	KIF3B	1658.43	-0.452039	0.1525	-2.96419	0.00303482	0.0193616
ENSMUSG00000031723	TXNL4B	471.48	-0.45257	0.127953	-3.537	0.000404706	0.00396183
ENSMUSG00000022434	FAM118A	271.049	-0.45288	0.166811	-2.71494	0.00662882	0.0354306
ENSMUSG00000026201	STK16	2551.22	-0.453624	0.121083	-3.74638	0.000179408	0.00205721
ENSMUSG00000018347	ZKSCAN6	893.562	-0.45382	0.166904	-2.71905	0.00654693	0.0351526
ENSMUSG00000003345	CSNK1G2	8364.16	-0.454088	0.154185	-2.94508	0.00322867	0.0203195
ENSMUSG00000030868	DCTN5	2284.82	-0.454531	0.108077	-4.20561	2.60373e-05	0.000424495
ENSMUSG00000030979	UROS	412.738	-0.455244	0.134008	-3.39715	0.000680909	0.00602451
ENSMUSG00000015092	EDF1	3586.31	-0.455957	0.173245	-2.63186	0.00849184	0.0425447
ENSMUSG00000055923	AASDH	515.348	-0.456415	0.144054	-3.16837	0.00153298	0.0115646
ENSMUSG00000060261	GTF2I	13396.7	-0.456801	0.108287	-4.21843	2.46011e-05	0.000405306
ENSMUSG00000070034	SP110	7703.52	-0.457387	0.1251	-3.65618	0.000255997	0.00275714
ENSMUSG00000047153	KHNYN	1261.68	-0.457701	0.16526	-2.76959	0.00561266	0.031247
ENSMUSG00000029534	ST7	759.224	-0.457732	0.105074	-4.35627	1.323e-05	0.000239533
ENSMUSG00000000194	GPR107	1676	-0.457747	0.16686	-2.74329	0.00608265	0.033266
ENSMUSG00000024135	SRBD1	996.188	-0.457941	0.12304	-3.7219	0.000197728	0.00222428
ENSMUSG00000028479	GNE	1888.29	-0.458006	0.141924	-3.22712	0.00125042	0.00981649
ENSMUSG00000015837	SQSTM1	7851.17	-0.458072	0.176555	-2.5945	0.00947278	0.0461956
ENSMUSG00000029146	SNX17	3507.53	-0.459741	0.141662	-3.24535	0.00117308	0.00937588
ENSMUSG00000052833	SAE1	4951	-0.460303	0.107867	-4.26732	1.97838e-05	0.000336578
ENSMUSG00000052488	CHERP	4998.89	-0.461288	0.163582	-2.81993	0.00480346	0.0277281
ENSMUSG00000028622	MRPL37	1646.52	-0.461345	0.149925	-3.07717	0.00208976	0.0146352
ENSMUSG00000050732	VAMP8	1653.54	-0.46136	0.152679	-3.02177	0.00251305	0.0167862
ENSMUSG00000024220	ZFP523	1227	-0.46161	0.148833	-3.10152	0.00192531	0.013798
ENSMUSG00000029703	LRWD1	3403.28	-0.462281	0.143557	-3.22019	0.00128107	0.00998843
ENSMUSG00000025237	PARP6	1072.67	-0.462906	0.120427	-3.84387	0.000121108	0.00148614
ENSMUSG00000036372	TMEM258	2335.04	-0.463176	0.165094	-2.80553	0.00502333	0.0286477
ENSMUSG00000022312	EIF3H	16004.1	-0.4632	0.168756	-2.74479	0.00605496	0.0331673
ENSMUSG00000024002	BRD4	9692.17	-0.463404	0.163448	-2.83518	0.00457994	0.0268216
ENSMUSG00000037971	1110032A03RIK	454.739	-0.463524	0.174737	-2.65269	0.00798533	0.0407077
ENSMUSG00000035069	OMA1	550.533	-0.464509	0.105482	-4.40366	1.0644e-05	0.000200229
ENSMUSG00000031072	ORAOV1	624.461	-0.465129	0.110097	-4.22472	2.39242e-05	0.000394911
ENSMUSG00000041203	2310036O22RIK	3689.77	-0.465433	0.147981	-3.14523	0.00165956	0.0122824
ENSMUSG00000036751	COX6B1	5206.05	-0.465801	0.169683	-2.74513	0.00604875	0.0331482
ENSMUSG00000032812	ARAP1	5067.09	-0.466582	0.161845	-2.88289	0.0039405	0.0238314
ENSMUSG00000045302	PREB	3616.35	-0.467211	0.0915227	-5.10487	3.3103e-07	1.0409e-05
ENSMUSG00000071451	PSMG4	559.844	-0.467247	0.172048	-2.71579	0.00661176	0.0353944
ENSMUSG00000095597	GM6472	37269	-0.467747	0.176893	-2.64425	0.00818731	0.0414219
ENSMUSG00000035781	R3HDM4	4205.7	-0.468074	0.145887	-3.20846	0.00133446	0.0102835
ENSMUSG00000019432	DDX39B	15258.5	-0.46813	0.124522	-3.75942	0.000170311	0.00196601
ENSMUSG00000040054	BAZ2A	7748.37	-0.468431	0.16124	-2.90518	0.00367042	0.0225147
ENSMUSG00000031129	SLC9A9	5570.88	-0.469034	0.160817	-2.91656	0.0035391	0.0218416
ENSMUSG00000075705	MSRB1	1114.72	-0.469188	0.161022	-2.91381	0.00357047	0.02198
ENSMUSG00000030842	LAMTOR1	2408.88	-0.469316	0.16752	-2.80156	0.00508569	0.0288979
ENSMUSG00000037742	EEF1A1	411052	-0.469898	0.112717	-4.16883	3.06168e-05	0.0004783
ENSMUSG00000036817	SUN1	1418.21	-0.470211	0.153965	-3.05402	0.00225801	0.0154855
ENSMUSG00000078584	AU022252	1020.98	-0.470585	0.116997	-4.02218	5.76613e-05	0.000811599
ENSMUSG00000060671	ATP8B2	4128.45	-0.4714	0.158407	-2.97587	0.00292158	0.0188066
ENSMUSG00000015889	LTA4H	11304.6	-0.471617	0.137641	-3.42643	0.000611577	0.00552185
ENSMUSG00000022554	HGH1	842.825	-0.47188	0.157422	-2.99756	0.00272154	0.0177987
ENSMUSG00000084786	UBL5	3775.25	-0.473182	0.13822	-3.4234	0.000618435	0.00556624
ENSMUSG00000021559	DAPK1	2777.27	-0.473211	0.157762	-2.99953	0.00270399	0.0177176
ENSMUSG00000028861	MRPS15	1328.05	-0.473315	0.131614	-3.59622	0.00032287	0.00333335
ENSMUSG00000038564	IFT172	1036.1	-0.473559	0.151536	-3.12506	0.00177767	0.0129779
ENSMUSG00000033540	IDUA	601.117	-0.473563	0.175766	-2.69427	0.00705424	0.0371503
ENSMUSG00000029097	TRMT44	480.905	-0.474628	0.144844	-3.27683	0.00104981	0.00861485
ENSMUSG00000064030	PYM1	2281.58	-0.474752	0.162144	-2.92796	0.00341192	0.021255
ENSMUSG00000041775	MAPK1IP1	350.977	-0.474964	0.167542	-2.83489	0.00458419	0.0268282
ENSMUSG00000039599	FAM149B	867.561	-0.47535	0.11948	-3.97851	6.93489e-05	0.000949682
ENSMUSG00000041346	WRAP53	918.394	-0.476235	0.126297	-3.77074	0.000162765	0.0018944
ENSMUSG00000043065	SPICE1	543.671	-0.476378	0.181864	-2.61942	0.00880784	0.0437341
ENSMUSG00000035790	CEP19	980.822	-0.476727	0.132371	-3.60144	0.000316465	0.00329292
ENSMUSG00000021290	2010107E04RIK	2315.07	-0.476968	0.184433	-2.58613	0.00970601	0.0470396
ENSMUSG00000052712	BC004004	1661.17	-0.47788	0.137393	-3.47821	0.000504781	0.00473146
ENSMUSG00000020091	EIF4EBP2	5398.74	-0.477988	0.134347	-3.55787	0.000373879	0.00371075
ENSMUSG00000005054	CSTB	1246.2	-0.478371	0.175021	-2.73322	0.00627187	0.0339904
ENSMUSG00000070284	GMPPB	679.374	-0.478997	0.177234	-2.70262	0.00687956	0.0364088
ENSMUSG00000036880	ACAA2	2861.1	-0.479114	0.149776	-3.19888	0.00137963	0.0105615
ENSMUSG00000052395	RFT1	491.77	-0.479304	0.122608	-3.90924	9.25878e-05	0.001192
ENSMUSG00000025532	CRCP	832.596	-0.479532	0.0918726	-5.21953	1.79373e-07	6.00238e-06
ENSMUSG00000060036	RPL3	61984	-0.479608	0.128958	-3.71911	0.000199927	0.00224315
ENSMUSG00000054920	KLHL5	865.062	-0.480181	0.155989	-3.07829	0.00208189	0.0146038
ENSMUSG00000053870	FPGT	375.575	-0.481063	0.183333	-2.62399	0.0086907	0.0432774
ENSMUSG00000033233	TRIM45	222.769	-0.481157	0.170671	-2.81921	0.00481419	0.027768
ENSMUSG00000020718	POLG2	249.451	-0.48142	0.156001	-3.086	0.00202869	0.0143318
ENSMUSG00000004849	AP1S1	1897.05	-0.481446	0.147995	-3.25312	0.00114145	0.00918289
ENSMUSG00000006782	CNP	8746.02	-0.481464	0.157222	-3.06232	0.0021963	0.015153
ENSMUSG00000025793	HGS	1755.73	-0.482149	0.144248	-3.34249	0.000830302	0.00710562
ENSMUSG00000073684	FAAP20	806.327	-0.482417	0.181328	-2.66046	0.00780332	0.0399813
ENSMUSG00000063511	SNRNP70	8570.66	-0.484164	0.156138	-3.10087	0.00192954	0.0138081
ENSMUSG00000052102	GNPDA1	938.85	-0.484667	0.161555	-3.00001	0.00269968	0.0177028
ENSMUSG00000072946	PTGR2	1162.04	-0.484675	0.16977	-2.85489	0.00430513	0.0255957
ENSMUSG00000021611	TERT	335.548	-0.485052	0.175104	-2.77007	0.00560435	0.0312159
ENSMUSG00000049517	RPS23	9555.54	-0.486168	0.146151	-3.32647	0.000879543	0.00748177
ENSMUSG00000032231	ANXA2	11598.7	-0.486285	0.173057	-2.80996	0.00495469	0.0283691
ENSMUSG00000024236	SVIL	4193.69	-0.486352	0.179226	-2.71362	0.00665527	0.0355168
ENSMUSG00000032788	PDXK	2257.99	-0.486667	0.186953	-2.60315	0.00923704	0.0453331
ENSMUSG00000001211	AGPAT3	4319.1	-0.487042	0.184768	-2.63596	0.00839003	0.0422573
ENSMUSG00000068735	TRP53I11	6345.79	-0.487357	0.137841	-3.53564	0.000406791	0.00397772
ENSMUSG00000032602	SLC25A20	1414.97	-0.487806	0.16406	-2.97333	0.00294584	0.0189132
ENSMUSG00000029022	MIIP	1218.18	-0.488451	0.178135	-2.74202	0.00610627	0.0333592
ENSMUSG00000007038	NEU1	1277.42	-0.489	0.139032	-3.51717	0.00043617	0.00420523
ENSMUSG00000039218	SRRM2	26682.8	-0.48947	0.172786	-2.83281	0.00461409	0.0268934
ENSMUSG00000005354	TXN2	3799.81	-0.490842	0.144205	-3.40378	0.0006646	0.00590756
ENSMUSG00000041560	GLTSCR2	13100.6	-0.49241	0.175954	-2.79853	0.00513364	0.029108
ENSMUSG00000057219	ARMC7	2469.57	-0.492507	0.190682	-2.58287	0.00979809	0.0473657
ENSMUSG00000042625	SAFB2	3240.5	-0.492511	0.119067	-4.1364	3.52791e-05	0.000540339
ENSMUSG00000002257	DEF6	8108.43	-0.492723	0.161872	-3.04389	0.00233537	0.0158768
ENSMUSG00000061104	SAP18B	3250.06	-0.492886	0.158825	-3.10333	0.00191358	0.0137369
ENSMUSG00000005103	WDR1	12093.3	-0.49293	0.152646	-3.22924	0.0012412	0.00978722
ENSMUSG00000022066	GM21685	865.559	-0.493005	0.176728	-2.78962	0.00527692	0.0296902
ENSMUSG00000025512	CHID1	1114.36	-0.493479	0.154267	-3.19886	0.00137974	0.0105615
ENSMUSG00000033938	NDUFB7	2336.2	-0.493689	0.175933	-2.80613	0.00501405	0.0286097
ENSMUSG00000021460	AUH	1106.86	-0.493738	0.0939866	-5.25328	1.49414e-07	5.10919e-06
ENSMUSG00000030104	EDEM1	10178.6	-0.495584	0.177572	-2.79089	0.00525637	0.0296328
ENSMUSG00000023967	MRPS18A	1256.81	-0.495775	0.155454	-3.1892	0.00142668	0.010882
ENSMUSG00000015095	FBXW5	1824.25	-0.496419	0.145788	-3.40507	0.000661474	0.00588281
ENSMUSG00000028107	TARS2	1872.17	-0.496616	0.111657	-4.44768	8.68042e-06	0.000169663
ENSMUSG00000063856	GPX1	7213.9	-0.497323	0.17486	-2.84412	0.00445338	0.0262413
ENSMUSG00000040033	STAT2	1884.95	-0.497392	0.169859	-2.92826	0.00340868	0.0212425
ENSMUSG00000050973	GDPGP1	364.908	-0.497741	0.162397	-3.06496	0.002177	0.0150803
ENSMUSG00000025102	3110040N11RIK	381.257	-0.49895	0.179696	-2.77664	0.00549243	0.030682
ENSMUSG00000025737	WDR24	1476.05	-0.499486	0.139261	-3.5867	0.000334886	0.00341639
ENSMUSG00000004056	AKT2	7608.04	-0.499623	0.172736	-2.89241	0.00382294	0.023243
ENSMUSG00000021127	ZFP36L1	3926.97	-0.499824	0.169385	-2.95082	0.00316932	0.0200192
ENSMUSG00000032353	TMED3	1243.83	-0.500482	0.162505	-3.0798	0.00207137	0.0145716
ENSMUSG00000050299	GM9843	11181.3	-0.501899	0.192755	-2.60382	0.00921911	0.0452794
ENSMUSG00000005897	NR2C1	498.037	-0.502578	0.140906	-3.56676	0.000361416	0.00362047
ENSMUSG00000021481	ZFP346	1151.94	-0.502999	0.106995	-4.70117	2.58677e-06	6.17094e-05
ENSMUSG00000024393	PRRC2A	24014.8	-0.503584	0.189656	-2.65525	0.00792505	0.0404723
ENSMUSG00000025209	TWNK	1279.77	-0.503802	0.188849	-2.66775	0.00763602	0.0394058
ENSMUSG00000001158	SNRNP27	1540.53	-0.503805	0.133712	-3.76783	0.000164674	0.00191119
ENSMUSG00000020133	2310011J03RIK	1525.74	-0.503907	0.169902	-2.96587	0.00301829	0.0192974
ENSMUSG00000024824	RAD9A	1163.21	-0.504652	0.136983	-3.68404	0.000229566	0.00252142
ENSMUSG00000036985	ZDHHC9	760.582	-0.504734	0.145465	-3.4698	0.000520837	0.00485287
ENSMUSG00000022956	ATP5O	5096.37	-0.505423	0.171059	-2.95467	0.00313004	0.019844
ENSMUSG00000022223	SDR39U1	947.854	-0.50589	0.192206	-2.63202	0.00848795	0.0425387
ENSMUSG00000026727	RSU1	1853.63	-0.505989	0.128978	-3.92308	8.74246e-05	0.00114003
ENSMUSG00000055681	COPE	3340.76	-0.506245	0.157044	-3.22358	0.00126598	0.00988416
ENSMUSG00000071456	1110002L01RIK	607.731	-0.506563	0.117838	-4.29882	1.71707e-05	0.000297717
ENSMUSG00000002250	PPARD	1048.19	-0.506977	0.182587	-2.77664	0.00549243	0.030682
ENSMUSG00000018567	GABARAP	5453.72	-0.507273	0.174026	-2.91493	0.00355768	0.0219169
ENSMUSG00000029705	CUX1	16704	-0.507808	0.130421	-3.89359	9.87702e-05	0.00126121
ENSMUSG00000021486	PRELID1	7510.19	-0.508904	0.160302	-3.17465	0.00150015	0.0113468
ENSMUSG00000031198	FUNDC2	1646.21	-0.50903	0.129547	-3.92931	8.51917e-05	0.00112026
[truncated: 1,308 more rows]

## Sheet: 3 hours KO vs HET filtered
ID	gene	baseMean	log2FoldChange	lfcSE	stat	pvalue	padj
ENSMUSG00000050272	DSCAM	244.711	6.09245	0.431652	14.1143	3.10296e-45	5.33708e-41
ENSMUSG00000068923	SYT11	926.687	4.42316	0.354088	12.4917	8.28871e-36	7.12829e-32
ENSMUSG00000108090	GM6637	30.6277	4.10048	0.487461	8.41192	4.03337e-17	3.30352e-14
ENSMUSG00000022996	WNT10B	204.692	3.79984	0.329242	11.5412	8.18048e-31	3.5176e-27
ENSMUSG00000049709	NLRP10	52.8229	3.75735	0.457475	8.21324	2.15291e-16	1.4812e-13
ENSMUSG00000104213	IGHD	93.1549	3.64707	0.337206	10.8155	2.90582e-27	9.99601e-24
ENSMUSG00000040998	NPNT	228.808	3.63201	0.411542	8.82537	1.09099e-18	1.44346e-15
ENSMUSG00000027254	MAP1A	152.301	3.60995	0.416499	8.66737	4.42231e-18	5.43312e-15
ENSMUSG00000041782	LAD1	109.211	3.56583	0.523416	6.81262	9.58352e-12	2.74728e-09
ENSMUSG00000026764	KIF5C	49.628	3.36513	0.406983	8.26846	1.35699e-16	9.72507e-14
ENSMUSG00000034855	CXCL10	323.532	3.33462	0.52237	6.38365	1.72914e-10	3.45185e-08
ENSMUSG00000028121	BCAR3	34.6758	3.2968	0.620826	5.31034	1.0942e-07	8.18615e-06
ENSMUSG00000048481	MYPOP	71.8547	3.26174	0.334263	9.75803	1.70437e-22	3.25725e-19
ENSMUSG00000029581	FSCN1	191.731	3.25226	0.491195	6.62111	3.56511e-11	8.39997e-09
ENSMUSG00000035042	CCL5	172.739	3.16158	0.518224	6.1008	1.05537e-09	1.59231e-07
ENSMUSG00000034177	RNF43	86.068	3.15744	0.609282	5.18223	2.19253e-07	1.49057e-05
ENSMUSG00000032470	MRAS	100.279	3.07232	0.390895	7.85969	3.85074e-15	2.13654e-12
ENSMUSG00000047880	CXCR5	200.214	3.00901	0.501179	6.00387	1.92668e-09	2.63008e-07
ENSMUSG00000086513	9130208D14RIK	72.3364	2.87417	0.672137	4.27617	1.90136e-05	0.000637493
ENSMUSG00000023990	TFEB	376.744	2.86631	0.333063	8.60589	7.57264e-18	8.6833e-15
ENSMUSG00000036867	SMAD6	34.0719	2.86265	0.460031	6.22272	4.88601e-10	8.40394e-08
ENSMUSG00000025608	PODXL	242.695	2.84829	0.62743	4.53962	5.63544e-06	0.000224558
ENSMUSG00000017009	SDC4	90.9192	2.82827	0.474211	5.96417	2.45875e-09	3.24034e-07
ENSMUSG00000107486	TRBV4	7.24064	2.81857	0.627227	4.4937	6.99975e-06	0.000270552
ENSMUSG00000027175	TCP11L1	108.947	2.76967	0.32318	8.57005	1.0344e-17	1.04657e-14
ENSMUSG00000032285	DNAJA4	30.2526	2.75361	0.518544	5.31026	1.09466e-07	8.18615e-06
ENSMUSG00000041481	SERPINA3G	170.258	2.7154	0.50301	5.39829	6.72787e-08	5.48433e-06
ENSMUSG00000020227	IRAK3	106.383	2.7138	0.55004	4.93383	8.06344e-07	4.57727e-05
ENSMUSG00000066363	SERPINA3F	57.9449	2.68948	0.564668	4.76295	1.90787e-06	9.32257e-05
ENSMUSG00000048142	NAT8L	198.02	2.68354	0.370518	7.24268	4.39888e-13	1.89152e-10
ENSMUSG00000001507	ITGA3	78.3598	2.66359	0.415683	6.40774	1.47688e-10	3.02409e-08
ENSMUSG00000042129	RASSF4	389.578	2.63392	0.36253	7.2654	3.71925e-13	1.64029e-10
ENSMUSG00000027639	SAMHD1	1730.26	2.62967	0.619558	4.24442	2.19156e-05	0.000712569
ENSMUSG00000089762	IER5L	25.7273	2.6122	0.460336	5.67455	1.39054e-08	1.42034e-06
ENSMUSG00000021217	TSHZ3	40.9919	2.60576	0.415844	6.26618	3.70014e-10	6.56107e-08
ENSMUSG00000030499	KCTD15	88.5687	2.59378	0.460396	5.63381	1.76275e-08	1.75256e-06
ENSMUSG00000041907	GPR45	72.6813	2.57752	0.496047	5.19611	2.035e-07	1.4057e-05
ENSMUSG00000017737	MMP9	198.987	2.57461	0.657429	3.91618	8.99633e-05	0.00221686
ENSMUSG00000066362	RPS13-PS1	1039.01	2.56456	0.667479	3.84216	0.000121956	0.00282322
ENSMUSG00000033209	TTC28	986.282	2.55167	0.305006	8.36597	5.962e-17	4.45854e-14
ENSMUSG00000092470	GM20518	33.9889	2.53406	0.470284	5.38836	7.11031e-08	5.74166e-06
ENSMUSG00000089809	RASGEF1B	89.0499	2.53377	0.321712	7.8759	3.38307e-15	1.93963e-12
ENSMUSG00000015437	GZMB	187.485	2.52172	0.672494	3.7498	0.000176978	0.00371194
ENSMUSG00000002104	RAPSN	266.201	2.49608	0.482779	5.17022	2.33812e-07	1.57093e-05
ENSMUSG00000005225	PLEKHA8	49.0791	2.46308	0.596393	4.12996	3.62832e-05	0.00106315
ENSMUSG00000003273	CAR11	13.41	2.45613	0.547775	4.48383	7.33161e-06	0.000282744
ENSMUSG00000056367	ACTR3B	53.2271	2.44825	0.523387	4.67771	2.90095e-06	0.000131482
ENSMUSG00000057337	CHST3	51.7317	2.44514	0.459717	5.31879	1.04461e-07	8.02113e-06
ENSMUSG00000025557	SLC15A1	1417.81	2.43405	0.421925	5.76891	7.97877e-09	8.9696e-07
ENSMUSG00000047205	DUSP18	56.3447	2.43238	0.476883	5.10057	3.38634e-07	2.16094e-05
ENSMUSG00000024597	SLC12A2	480.358	2.43209	0.287598	8.45657	2.75365e-17	2.36814e-14
ENSMUSG00000038179	SLAMF7	47.3244	2.40804	0.608195	3.95932	7.51621e-05	0.00193531
ENSMUSG00000033377	PALMD	93.0718	2.40776	0.672741	3.57902	0.000344884	0.00621803
ENSMUSG00000022696	SIDT1	769.957	2.40493	0.333309	7.21531	5.38097e-13	2.20364e-10
ENSMUSG00000054672	5830411N06RIK	9114.87	2.38706	0.386322	6.17894	6.45331e-10	1.05711e-07
ENSMUSG00000021094	DHRS7	223.315	2.37467	0.445213	5.33379	9.61818e-08	7.51966e-06
ENSMUSG00000100529	GM19261	30.2162	2.36178	0.499398	4.72926	2.25345e-06	0.000106509
ENSMUSG00000028300	3110043O21RIK	107.858	2.34165	0.279369	8.3819	5.2078e-17	4.07155e-14
ENSMUSG00000031520	VEGFC	33.3624	2.32058	0.439585	5.27902	1.29876e-07	9.46557e-06
ENSMUSG00000022747	ST3GAL6	208.954	2.31892	0.450675	5.14544	2.66893e-07	1.75884e-05
ENSMUSG00000032737	INPPL1	77.6881	2.30571	0.628692	3.66748	0.000244956	0.00480416
ENSMUSG00000031428	ZCCHC18	134.885	2.2906	0.371723	6.16213	7.17745e-10	1.15376e-07
ENSMUSG00000037679	INF2	865.64	2.28652	0.320233	7.14018	9.32069e-13	3.33991e-10
ENSMUSG00000092500	GM20400	198.893	2.28033	0.395964	5.75894	8.46413e-09	9.39245e-07
ENSMUSG00000020841	CPD	206.582	2.25868	0.292338	7.72626	1.1075e-14	5.60265e-12
ENSMUSG00000040502	2009-03-01	290.527	2.24979	0.279932	8.0369	9.21387e-16	5.46478e-13
ENSMUSG00000062782	OLFR527	16.3651	2.24606	0.528793	4.24752	2.16145e-05	0.000705446
ENSMUSG00000068205	MACROD2	84.4371	2.24542	0.274176	8.18971	2.61864e-16	1.68407e-13
ENSMUSG00000099655	2310034G01RIK	27.7148	2.24407	0.41801	5.36847	7.94078e-08	6.35262e-06
ENSMUSG00000049580	TSKU	20.1052	2.2419	0.509923	4.39655	1.09984e-05	0.00039826
ENSMUSG00000109398	GM3854	53.6862	2.2362	0.35519	6.29577	3.05872e-10	5.53789e-08
ENSMUSG00000035172	PLEKHH3	125.643	2.22953	0.506846	4.39884	1.08833e-05	0.000395755
ENSMUSG00000003153	SLC2A3	2696.17	2.22701	0.21851	10.1918	2.15742e-24	5.31407e-21
ENSMUSG00000099397	GM7809	22.2504	2.20848	0.479585	4.60499	4.12495e-06	0.000176428
ENSMUSG00000050132	SARM1	32.9692	2.20775	0.541909	4.07403	4.62074e-05	0.00131584
ENSMUSG00000052364	B630019K06RIK	36.9194	2.17681	0.479531	4.53945	5.64005e-06	0.000224558
ENSMUSG00000026249	SERPINE2	138.532	2.17355	0.576503	3.77023	0.000163097	0.00351538
ENSMUSG00000041633	KCTD12B	51.8812	2.17196	0.450539	4.82081	1.42976e-06	7.40721e-05
ENSMUSG00000051146	CAMK2N2	35.2378	2.16817	0.400416	5.4148	6.13584e-08	5.09838e-06
ENSMUSG00000037613	TNFRSF23	28.868	2.1623	0.609181	3.54953	0.000385925	0.00675957
ENSMUSG00000038764	PTPN3	633.962	2.16094	0.4488	4.81494	1.47245e-06	7.548e-05
ENSMUSG00000001542	ELL2	122.73	2.15814	0.350634	6.15498	7.50865e-10	1.19582e-07
ENSMUSG00000024511	RAB27B	71.8774	2.15252	0.607339	3.54419	0.000393827	0.00683534
ENSMUSG00000036181	HIST1H1C	686.645	2.14765	0.215181	9.98066	1.85228e-23	3.98239e-20
ENSMUSG00000034818	CELF5	70.9275	2.14557	0.528862	4.05695	4.9717e-05	0.00140026
ENSMUSG00000003228	GRK5	287.279	2.1392	0.209899	10.1916	2.1627e-24	5.31407e-21
ENSMUSG00000084403	RPS15A-PS8	203.446	2.13748	0.655359	3.26153	0.00110811	0.015107
ENSMUSG00000090215	TRIM34B	27.6664	2.13336	0.632659	3.37205	0.000746105	0.0111688
ENSMUSG00000026342	SLC35F5	126.432	2.12587	0.390885	5.43861	5.36993e-08	4.59517e-06
ENSMUSG00000062785	KCNC3	59.2078	2.12328	0.353384	6.00841	1.87347e-09	2.57789e-07
ENSMUSG00000001020	S100A4	971.186	2.12286	0.657804	3.22719	0.00125013	0.0164516
ENSMUSG00000045709	SMKR-PS	11.8597	2.12179	0.578991	3.66463	0.000247693	0.0048523
ENSMUSG00000055170	IFNG	46.0667	2.11862	0.421399	5.02759	4.9668e-07	2.99751e-05
ENSMUSG00000033276	STK36	35.9785	2.1135	0.341861	6.18235	6.31558e-10	1.0445e-07
ENSMUSG00000068606	GM4841	51.7537	2.1092	0.541915	3.89212	9.93704e-05	0.00237715
ENSMUSG00000024892	PCX	286.917	2.10915	0.331412	6.36414	1.96385e-10	3.83843e-08
ENSMUSG00000049119	FAM110B	171.322	2.10483	0.389327	5.40634	6.43269e-08	5.29389e-06
ENSMUSG00000017167	CNTNAP1	943.478	2.10452	0.528166	3.98457	6.76022e-05	0.00178337
ENSMUSG00000078480	MRPL48-PS	49.7744	2.09195	0.598747	3.49389	0.000476046	0.00793409
ENSMUSG00000038718	PBX3	20.9825	2.09114	0.440031	4.75226	2.01159e-06	9.71891e-05
ENSMUSG00000021123	RDH12	221.446	2.08215	0.301666	6.90216	5.12184e-12	1.51889e-09
ENSMUSG00000052151	PLPP2	56.6503	2.07529	0.445916	4.65399	3.25571e-06	0.00014545
ENSMUSG00000021556	GOLM1	185.144	2.07278	0.457933	4.52639	5.99993e-06	0.000236694
ENSMUSG00000053181	A830005F24RIK	15.8167	2.06886	0.451098	4.58628	4.51213e-06	0.000189752
ENSMUSG00000025491	IFITM1	6.87303	2.0468	0.600172	3.41035	0.000648785	0.0100532
ENSMUSG00000024427	SPRY4	259.507	2.04673	0.417771	4.89918	9.62398e-07	5.35704e-05
ENSMUSG00000051062	FBLL1	13.3469	2.04469	0.535679	3.817	0.000135084	0.00303322
ENSMUSG00000069833	AHNAK	1177.11	2.04356	0.601035	3.40007	0.000673694	0.0103698
ENSMUSG00000032648	PYGM	117.226	2.03233	0.509718	3.98718	6.68647e-05	0.00176934
ENSMUSG00000109931	GM45243	5.89065	2.01745	0.629524	3.20472	0.00135192	0.0174703
ENSMUSG00000070385	AMPD1	112.343	2.01587	0.593861	3.39451	0.00068751	0.0105113
ENSMUSG00000039563	2210406O10RIK	11.2677	2.01583	0.524193	3.84559	0.000120265	0.00279157
ENSMUSG00000100838	GM29094	9.193	2.01467	0.664354	3.03253	0.00242514	0.0275802
ENSMUSG00000045672	COL27A1	328.898	2.0105	0.478734	4.19961	2.67371e-05	0.000836141
ENSMUSG00000021200	ASB2	277.038	2.00112	0.502312	3.98383	6.7814e-05	0.00178522
ENSMUSG00000038807	RAP1GAP2	1075.71	1.99153	0.577229	3.45016	0.000560253	0.00895976
ENSMUSG00000029359	TESC	142.765	1.98666	0.418894	4.74262	2.1097e-06	0.000100797
ENSMUSG00000022589	CYP11B2	23.2427	1.98495	0.671836	2.95452	0.0031316	0.0334141
ENSMUSG00000073555	GM4951	146.602	1.98295	0.557224	3.55862	0.000372815	0.00657683
ENSMUSG00000055013	AGAP1	200.116	1.97841	0.420167	4.70863	2.49387e-06	0.000114691
ENSMUSG00000005947	ITGAE	1337.17	1.97785	0.430796	4.59115	4.40807e-06	0.000186287
ENSMUSG00000031155	PIM2	1110.16	1.97641	0.401711	4.91999	8.65476e-07	4.88072e-05
ENSMUSG00000078794	DACT3	31.687	1.97335	0.41904	4.70922	2.48671e-06	0.000114669
ENSMUSG00000046314	STXBP6	38.5597	1.96737	0.458803	4.28806	1.80242e-05	0.000610267
ENSMUSG00000040717	IL17RD	136.174	1.95717	0.399921	4.89389	9.88645e-07	5.46775e-05
ENSMUSG00000032841	PRR5L	54.1862	1.95342	0.522261	3.74031	0.000183793	0.00381333
ENSMUSG00000021636	MARVELD2	108.857	1.9469	0.432537	4.50113	6.75944e-06	0.000263037
ENSMUSG00000086320	GM12840	172.401	1.93833	0.364952	5.3112	1.08906e-07	8.18615e-06
ENSMUSG00000027834	SERPINI1	271.665	1.93602	0.32542	5.9493	2.69293e-09	3.48259e-07
ENSMUSG00000044433	CAMSAP3	53.4535	1.93363	0.409482	4.72214	2.33376e-06	0.000109078
ENSMUSG00000028459	CD72	503.227	1.9228	0.358487	5.36367	8.15486e-08	6.49368e-06
ENSMUSG00000029419	GM996	47.2574	1.91643	0.435104	4.40454	1.06007e-05	0.000388768
ENSMUSG00000019944	RHOBTB1	35.8734	1.91599	0.35521	5.39396	6.8923e-08	5.59187e-06
ENSMUSG00000017724	ETV4	74.6474	1.91356	0.557719	3.43105	0.000601252	0.00946659
ENSMUSG00000020669	SH3YL1	39.8551	1.91309	0.408108	4.68771	2.76279e-06	0.000125714
ENSMUSG00000028278	RRAGD	152.97	1.90931	0.403251	4.7348	2.19269e-06	0.000104472
ENSMUSG00000026070	IL18R1	227.137	1.90753	0.672398	2.8369	0.00455536	0.0443896
ENSMUSG00000029070	MXRA8	25.2097	1.90737	0.478208	3.98857	6.64727e-05	0.0017644
ENSMUSG00000092367	GM20479	31.2966	1.9067	0.671195	2.84075	0.0045007	0.0440382
ENSMUSG00000031519	ASB5	26.2182	1.9036	0.432457	4.40183	1.0734e-05	0.000391154
ENSMUSG00000107868	GM5112	34.9688	1.90186	0.361356	5.26313	1.41625e-07	1.01923e-05
ENSMUSG00000028214	GEM	801.86	1.89614	0.333693	5.68228	1.32908e-08	1.37712e-06
ENSMUSG00000056043	RGS9BP	61.3673	1.88987	0.364017	5.19172	2.08362e-07	1.42215e-05
ENSMUSG00000036019	TMTC2	210.445	1.88741	0.329801	5.72286	1.04747e-08	1.12603e-06
ENSMUSG00000004267	ENO2	36.1271	1.887	0.450502	4.18866	2.806e-05	0.000864933
ENSMUSG00000105112	GM42778	19.105	1.87946	0.586267	3.20581	0.00134681	0.0174398
ENSMUSG00000027030	STK39	558.316	1.87744	0.332874	5.6401	1.69952e-08	1.70945e-06
ENSMUSG00000029417	CXCL9	37.5303	1.87674	0.44667	4.20162	2.65006e-05	0.000830257
ENSMUSG00000029304	SPP1	16.9297	1.87413	0.537075	3.4895	0.00048392	0.00802645
ENSMUSG00000053175	BCL3	275.961	1.87094	0.404329	4.62728	3.70496e-06	0.000162564
ENSMUSG00000004383	LARGE1	248.883	1.84913	0.311654	5.93327	2.96955e-09	3.81166e-07
ENSMUSG00000018102	HIST1H2BC	681.057	1.84751	0.324904	5.68633	1.29798e-08	1.36129e-06
ENSMUSG00000022883	ROBO1	67.8222	1.84112	0.537618	3.42459	0.000615719	0.00963459
ENSMUSG00000004633	CHN2	1124.01	1.84077	0.565263	3.25648	0.00112802	0.015252
ENSMUSG00000019302	ATP6V0A1	199.907	1.83947	0.330955	5.55807	2.72776e-08	2.57788e-06
ENSMUSG00000032348	GSTA4	88.9924	1.83917	0.310222	5.92854	3.05637e-09	3.89405e-07
ENSMUSG00000017754	PLTP	93.4972	1.83751	0.515291	3.56597	0.000362508	0.00645921
ENSMUSG00000037703	LZTS3	116.564	1.83458	0.255255	7.18725	6.61089e-13	2.58426e-10
ENSMUSG00000026700	TNFSF4	39.3494	1.8307	0.43725	4.18685	2.82857e-05	0.00086779
ENSMUSG00000054871	TMEM158	81.2434	1.82753	0.429234	4.25765	2.0659e-05	0.000682025
ENSMUSG00000032238	RORA	763.167	1.82673	0.478999	3.81364	0.000136937	0.00306682
ENSMUSG00000034156	TSPOAP1	225.258	1.81502	0.353091	5.14038	2.74182e-07	1.79313e-05
ENSMUSG00000036492	RNF39	22.2693	1.81258	0.442833	4.09316	4.25541e-05	0.00122396
ENSMUSG00000051314	FFAR2	33.7806	1.81244	0.566556	3.19905	0.00137883	0.0177647
ENSMUSG00000027257	PACSIN3	12.615	1.80283	0.511311	3.5259	0.000422042	0.00721583
ENSMUSG00000054855	RND1	22.9383	1.79892	0.442927	4.06144	4.87707e-05	0.00137956
ENSMUSG00000104950	4833413G10RIK	108.677	1.798	0.309475	5.80983	6.25377e-09	7.36745e-07
ENSMUSG00000070392	GM20634	239.873	1.79607	0.257687	6.96998	3.16995e-12	1.02874e-09
ENSMUSG00000021675	F2RL2	21.1434	1.79556	0.613466	2.9269	0.00342355	0.0356232
ENSMUSG00000036764	DNAJC12	262.246	1.79374	0.251083	7.144	9.06508e-13	3.31743e-10
ENSMUSG00000036989	TRIM3	148.733	1.78851	0.263625	6.7843	1.16654e-11	3.2362e-09
ENSMUSG00000031762	MT2	82.1945	1.7829	0.559393	3.1872	0.00143656	0.0183846
ENSMUSG00000023132	GZMA	12079.1	1.78015	0.431995	4.12076	3.77631e-05	0.00109946
ENSMUSG00000105851	9130604C24RIK	65.2618	1.76428	0.301591	5.84991	4.91846e-09	5.91591e-07
ENSMUSG00000019055	PLOD1	891.578	1.75856	0.254251	6.91661	4.62571e-12	1.44659e-09
ENSMUSG00000033538	CASP4	353.103	1.75617	0.361501	4.85799	1.18586e-06	6.33528e-05
ENSMUSG00000058881	ZFP516	313.136	1.74686	0.318036	5.49264	3.95966e-08	3.52881e-06
ENSMUSG00000028392	BSPRY	256.461	1.74285	0.429617	4.05675	4.97594e-05	0.00140026
ENSMUSG00000055493	EPM2A	91.5999	1.73545	0.397814	4.36248	1.28598e-05	0.000457073
ENSMUSG00000042340	CTF1	20.5526	1.73397	0.516633	3.35629	0.000789947	0.0116928
ENSMUSG00000056602	FRY	359.995	1.73359	0.373623	4.63993	3.48529e-06	0.00015371
ENSMUSG00000022479	VDR	52.134	1.725	0.472177	3.6533	0.000258894	0.00500897
ENSMUSG00000058297	SPOCK2	204.402	1.72256	0.618617	2.78453	0.0053605	0.0497843
ENSMUSG00000034981	PARM1	54.9837	1.70615	0.544629	3.13269	0.00173212	0.0214547
ENSMUSG00000053580	TANC2	379.641	1.69864	0.397487	4.27344	1.9248e-05	0.000641601
ENSMUSG00000056055	SAG	36.0429	1.6976	0.566553	2.99636	0.00273222	0.0301245
ENSMUSG00000081137	BC022960	18.9419	1.69307	0.469779	3.60398	0.000313384	0.00576566
ENSMUSG00000001444	TBX21	43.457	1.68842	0.542667	3.11134	0.00186238	0.0226541
ENSMUSG00000067336	BMPR2	616.312	1.68302	0.325261	5.17437	2.28679e-07	1.54246e-05
ENSMUSG00000051817	SOX12	724.646	1.67933	0.399566	4.20288	2.63539e-05	0.000829709
ENSMUSG00000035158	MITF	63.5866	1.67873	0.281867	5.95573	2.58908e-09	3.37365e-07
ENSMUSG00000006356	CRIP2	239.459	1.67616	0.363494	4.61125	4.00246e-06	0.000171677
ENSMUSG00000047415	GPR68	897.777	1.67422	0.572202	2.92592	0.00343438	0.0356937
ENSMUSG00000035473	GALM	472.962	1.6689	0.299433	5.57352	2.4965e-08	2.38554e-06
ENSMUSG00000047632	FGFBP3	70.8598	1.65693	0.240054	6.90233	5.11575e-12	1.51889e-09
ENSMUSG00000030786	ITGAM	81.0497	1.6519	0.544536	3.03359	0.00241659	0.0275267
ENSMUSG00000020828	PLD2	71.3654	1.65009	0.34079	4.84197	1.28559e-06	6.80376e-05
ENSMUSG00000027438	NAPB	41.3924	1.64983	0.372132	4.43345	9.27371e-06	0.000346756
ENSMUSG00000022885	ST6GAL1	5568.77	1.64915	0.329936	4.99839	5.78122e-07	3.44073e-05
ENSMUSG00000020646	MBOAT2	35.3334	1.64746	0.465358	3.54021	0.00039981	0.00692521
ENSMUSG00000020424	GATSL3	271.431	1.64226	0.411125	3.99455	6.48179e-05	0.0017258
ENSMUSG00000030970	CTBP2	32.2393	1.63847	0.434819	3.76817	0.00016445	0.00353602
ENSMUSG00000015766	EPS8	25.9814	1.62771	0.545824	2.98212	0.0028626	0.0311427
ENSMUSG00000025870	ARL10	139.442	1.62341	0.242915	6.68305	2.34018e-11	5.83348e-09
ENSMUSG00000083816	GM13033	12.6258	1.62182	0.452872	3.58118	0.000342041	0.00617326
ENSMUSG00000039782	CPEB2	101.522	1.6214	0.519181	3.12299	0.00179025	0.0220102
ENSMUSG00000049811	FAM161A	13.8034	1.61434	0.559526	2.88519	0.00391177	0.0393005
ENSMUSG00000045231	BC106179	90.9688	1.61249	0.45305	3.5592	0.000371991	0.00656903
ENSMUSG00000038729	AKAP2	1255.82	1.61062	0.397535	4.05152	5.08861e-05	0.00142547
ENSMUSG00000042616	OSCP1	79.0564	1.6104	0.31669	5.08511	3.6742e-07	2.31488e-05
ENSMUSG00000031079	ZFP300	36.6523	1.60831	0.410788	3.91518	9.03362e-05	0.00222286
ENSMUSG00000091764	ZFP964	40.9039	1.60652	0.443842	3.61958	0.000295087	0.00554538
ENSMUSG00000053137	MAPK11	560.507	1.60116	0.43857	3.65086	0.000261362	0.00505105
ENSMUSG00000026836	ACVR1	26.8351	1.59578	0.434917	3.66915	0.000243355	0.0047782
ENSMUSG00000015312	GADD45B	231.471	1.5948	0.30168	5.2864	1.2475e-07	9.16965e-06
ENSMUSG00000041649	KLF8	79.7946	1.59466	0.424511	3.75646	0.000172331	0.00363248
ENSMUSG00000034487	KDELC2	107.218	1.589	0.51478	3.08675	0.00202356	0.0240867
ENSMUSG00000054843	ATRNL1	247.606	1.58464	0.283387	5.59176	2.24774e-08	2.18425e-06
ENSMUSG00000059495	ARHGEF12	135.464	1.58094	0.305971	5.16695	2.37949e-07	1.5925e-05
ENSMUSG00000031149	PRAF2	943.21	1.57968	0.27626	5.71808	1.07735e-08	1.15096e-06
ENSMUSG00000092368	A930015D03RIK	155.996	1.57959	0.534113	2.9574	0.00310245	0.0331854
ENSMUSG00000030410	DMWD	976.141	1.57162	0.361419	4.34847	1.37091e-05	0.00048227
ENSMUSG00000046280	SHE	233.92	1.57047	0.497218	3.15852	0.00158574	0.0199079
ENSMUSG00000049488	TMEM67	149.767	1.57022	0.263301	5.9636	2.46734e-09	3.24034e-07
ENSMUSG00000027505	FAM209	7.38455	1.56998	0.563815	2.78457	0.00535989	0.0497843
ENSMUSG00000025359	PMEL	23.3141	1.56694	0.413292	3.79137	0.000149819	0.00329105
ENSMUSG00000013033	ADGRL1	2730.92	1.55877	0.166595	9.35664	8.23091e-21	1.41572e-17
ENSMUSG00000028184	ADGRL2	137.618	1.55068	0.34692	4.46985	7.8274e-06	0.000297857
ENSMUSG00000066952	MYO1H	92.2042	1.54313	0.354528	4.35262	1.34519e-05	0.000476076
ENSMUSG00000027805	PFN2	95.0319	1.54078	0.249537	6.17453	6.63614e-10	1.07681e-07
ENSMUSG00000097842	9330104G04RIK	25.6931	1.53913	0.450783	3.41435	0.000639337	0.00993369
ENSMUSG00000022114	SPRY2	242.963	1.53673	0.476576	3.22452	0.00126182	0.0165674
ENSMUSG00000105858	2310074N15RIK	8.52714	1.53635	0.522668	2.93944	0.0032881	0.034527
ENSMUSG00000014813	STC1	115.307	1.53432	0.543599	2.82253	0.00476471	0.0456817
ENSMUSG00000037995	IGSF9	41.097	1.53383	0.390719	3.92566	8.64909e-05	0.00214358
ENSMUSG00000022265	ANK	291.833	1.5322	0.312049	4.91013	9.10152e-07	5.09922e-05
ENSMUSG00000020231	DIP2A	195.734	1.52877	0.302217	5.05852	4.22524e-07	2.61418e-05
ENSMUSG00000030409	DMPK	53.1309	1.52448	0.450657	3.3828	0.000717507	0.0108066
ENSMUSG00000085633	BLOC1S6OS	11.1575	1.51956	0.478918	3.17291	0.00150919	0.0191714
ENSMUSG00000081564	GM13717	15.8555	1.51914	0.496648	3.05878	0.0022224	0.0258978
ENSMUSG00000032656	2003-03-01	14.7178	1.51694	0.47042	3.22465	0.00126126	0.0165674
ENSMUSG00000037664	CDKN1C	47.6539	1.51505	0.331698	4.56756	4.93446e-06	0.000202078
ENSMUSG00000039232	STX11	48.4063	1.51471	0.357631	4.23539	2.28152e-05	0.000734872
ENSMUSG00000031220	AWAT2	22.591	1.51303	0.388266	3.8969	9.74313e-05	0.00234275
ENSMUSG00000057897	CAMK2B	544.93	1.51063	0.395822	3.81643	0.000135394	0.00303622
ENSMUSG00000087406	E130215H24RIK	88.3096	1.50664	0.30526	4.9356	7.99031e-07	4.56589e-05
ENSMUSG00000022332	KHDRBS3	39.041	1.5045	0.492514	3.05474	0.00225254	0.0261384
ENSMUSG00000048027	RGMB	60.424	1.50298	0.38555	3.89829	9.68763e-05	0.00234027
ENSMUSG00000034266	BATF	895.577	1.50134	0.268544	5.59068	2.26181e-08	2.18556e-06
ENSMUSG00000008540	MGST1	30.357	1.49953	0.508841	2.94695	0.00320927	0.0339277
ENSMUSG00000004562	ARHGEF40	318.037	1.49401	0.347089	4.30441	1.67433e-05	0.000576867
ENSMUSG00000045287	RTN4RL1	806.103	1.49286	0.325812	4.58195	4.60652e-06	0.000192779
ENSMUSG00000074643	CPNE1	2337.27	1.49135	0.274773	5.42757	5.71266e-08	4.84028e-06
ENSMUSG00000090236	CAR15	62.0538	1.48879	0.29578	5.03344	4.81748e-07	2.91763e-05
ENSMUSG00000024402	LTA	135.673	1.48535	0.459309	3.23388	0.00122123	0.0161234
ENSMUSG00000000127	FER	44.1557	1.47979	0.374703	3.94925	7.83956e-05	0.0020006
ENSMUSG00000047227	GM527	24.6462	1.47964	0.410549	3.60406	0.000313284	0.00576566
ENSMUSG00000106874	GM20186	157.171	1.47912	0.434563	3.4037	0.000664806	0.0102737
ENSMUSG00000028047	THBS3	15.0577	1.47612	0.445212	3.31553	0.000914688	0.0130453
ENSMUSG00000108176	GM43965	31.3658	1.47522	0.474475	3.10916	0.00187619	0.0227898
ENSMUSG00000014547	WDFY2	263.448	1.46951	0.232781	6.31283	2.73979e-10	5.05368e-08
ENSMUSG00000015243	ABCA1	609.989	1.46941	0.462832	3.17483	0.00149925	0.0190875
ENSMUSG00000029919	HPGDS	22.0135	1.46154	0.450364	3.24525	0.00117347	0.0156221
ENSMUSG00000046550	SPIN2C	40.9344	1.4604	0.489543	2.98319	0.00285256	0.0311009
ENSMUSG00000021375	KIF13A	566.06	1.45892	0.322945	4.51754	6.25619e-06	0.000245677
ENSMUSG00000038079	TMEM237	279.772	1.45613	0.250791	5.80614	6.393e-09	7.48024e-07
ENSMUSG00000044080	S100A1	67.8271	1.45273	0.372812	3.89667	9.75238e-05	0.00234275
ENSMUSG00000035640	CBARP	458.588	1.44897	0.315399	4.59409	4.34639e-06	0.000184587
ENSMUSG00000024524	GNAL	94.285	1.44875	0.279663	5.18035	2.21473e-07	1.49974e-05
ENSMUSG00000039556	PPP1R3F	73.3972	1.44755	0.342649	4.22459	2.39375e-05	0.000761044
ENSMUSG00000038515	GRTP1	70.6226	1.44407	0.514099	2.80893	0.00497064	0.0471566
ENSMUSG00000079502	CFAP77	109.065	1.44373	0.400567	3.60421	0.000313103	0.00576566
ENSMUSG00000045102	POLN	45.3797	1.4404	0.384729	3.74392	0.000181172	0.00377457
ENSMUSG00000021701	PLK2	62.206	1.44027	0.330972	4.35163	1.35128e-05	0.000477249
ENSMUSG00000041202	PLA2G2D	18.3398	1.43524	0.479486	2.99328	0.00275994	0.0303717
ENSMUSG00000043155	HPDL	26.6791	1.43317	0.446415	3.21039	0.00132555	0.0172201
ENSMUSG00000040997	ABHD4	1728.01	1.43289	0.216866	6.60727	3.91483e-11	9.09932e-09
ENSMUSG00000003452	BICD1	76.6517	1.43066	0.493884	2.89676	0.00377035	0.0384182
ENSMUSG00000084866	A930006K02RIK	79.6935	1.41957	0.279001	5.08805	3.61761e-07	2.28761e-05
ENSMUSG00000036587	FUT7	452.479	1.41824	0.427718	3.31582	0.000913735	0.0130425
ENSMUSG00000035298	KLHL35	30.6559	1.41733	0.403276	3.51454	0.000440525	0.00748718
ENSMUSG00000031803	B3GNT3	75.0396	1.40815	0.238939	5.89337	3.78405e-09	4.75078e-07
ENSMUSG00000068463	B630019A10RIK	209.017	1.4069	0.469482	2.99671	0.0027291	0.0301094
ENSMUSG00000027950	CHRNB2	282.07	1.40139	0.239082	5.86156	4.58539e-09	5.674e-07
ENSMUSG00000059970	HSPA2	166.566	1.4011	0.215778	6.49325	8.40052e-11	1.87648e-08
ENSMUSG00000024579	PCYOX1L	142.6	1.3971	0.289372	4.82802	1.379e-06	7.20935e-05
ENSMUSG00000035713	USP35	68.5607	1.39584	0.422482	3.3039	0.000953511	0.0134872
ENSMUSG00000034799	UNC13A	73.2316	1.39454	0.304125	4.58542	4.53072e-06	0.000190069
ENSMUSG00000041762	GPR155	90.3075	1.39428	0.340015	4.10065	4.11996e-05	0.00119098
ENSMUSG00000042510	AA986860	36.2744	1.39359	0.387267	3.59854	0.000320011	0.00586176
ENSMUSG00000032387	RBPMS2	38.943	1.39064	0.442228	3.14463	0.00166299	0.0207271
ENSMUSG00000107476	ZFP862-PS	145.601	1.38822	0.268959	5.16143	2.45068e-07	1.63379e-05
ENSMUSG00000032607	AMT	23.05	1.38606	0.478174	2.89864	0.00374781	0.038302
ENSMUSG00000034751	MAST4	515.505	1.38504	0.368511	3.75847	0.000170957	0.00361359
ENSMUSG00000029223	UCHL1	252.117	1.38472	0.368982	3.7528	0.000174873	0.00367704
ENSMUSG00000074570	CASS4	105.725	1.38379	0.259793	5.32652	1.00114e-07	7.75655e-06
ENSMUSG00000046269	USP27X	85.6267	1.38051	0.249436	5.53452	3.12084e-08	2.88594e-06
ENSMUSG00000022957	ITSN1	114.712	1.38011	0.238256	5.79253	6.93319e-09	8.00342e-07
ENSMUSG00000035849	KRT222	27.4459	1.3746	0.475176	2.89282	0.00381796	0.0387199
ENSMUSG00000032462	PIK3CB	139.801	1.37351	0.260587	5.27082	1.35813e-07	9.85647e-06
ENSMUSG00000031755	BBS2	331.676	1.36751	0.228989	5.97193	2.34458e-09	3.16451e-07
ENSMUSG00000027171	PRRG4	516.596	1.36249	0.332836	4.09359	4.24749e-05	0.00122373
ENSMUSG00000031714	GAB1	227.457	1.36067	0.393016	3.46213	0.000535925	0.00866344
ENSMUSG00000107096	GM43597	83.3454	1.35917	0.33672	4.03649	5.42572e-05	0.00149795
ENSMUSG00000044583	TLR7	122.694	1.35853	0.393312	3.45408	0.000552184	0.00885966
ENSMUSG00000033450	TAGAP	1278	1.35768	0.399427	3.39907	0.000676145	0.0103929
ENSMUSG00000028068	IQGAP3	1008.98	1.35675	0.357637	3.79364	0.000148454	0.00327361
ENSMUSG00000070802	PNMAL2	133.38	1.35395	0.307931	4.39692	1.09798e-05	0.00039826
ENSMUSG00000031217	EFNB1	206.04	1.35186	0.277558	4.87054	1.11292e-06	6.05766e-05
ENSMUSG00000031880	RRAD	611.794	1.35141	0.224036	6.03211	1.61832e-09	2.30043e-07
ENSMUSG00000030257	SRGAP3	302.261	1.35058	0.373056	3.62031	0.000294254	0.00554538
ENSMUSG00000106928	GM43860	97.5245	1.34777	0.252286	5.34223	9.18087e-08	7.22643e-06
ENSMUSG00000020474	POLM	388.435	1.34755	0.338274	3.9836	6.78797e-05	0.00178522
ENSMUSG00000042190	CMKLR1	62.1792	1.34629	0.40488	3.32515	0.00088371	0.0126983
ENSMUSG00000001089	LUZP1	768.804	1.34201	0.232313	5.77673	7.61685e-09	8.67615e-07
ENSMUSG00000032606	NICN1	223.71	1.34023	0.189112	7.08697	1.37077e-12	4.71543e-10
ENSMUSG00000026994	GALNT3	404.234	1.34004	0.265727	5.04294	4.58436e-07	2.78625e-05
ENSMUSG00000073409	H2-Q6	7629.99	1.33172	0.410103	3.24729	0.00116509	0.0155813
ENSMUSG00000019732	CALR3	50.6176	1.32851	0.304533	4.36244	1.28618e-05	0.000457073
ENSMUSG00000079057	CYP4V3	250.528	1.32836	0.340119	3.90557	9.40051e-05	0.00229118
ENSMUSG00000041329	ATP1B2	76.7235	1.32823	0.391927	3.38897	0.000701555	0.0106035
ENSMUSG00000031728	ZFP821	559.071	1.32774	0.301219	4.40787	1.04391e-05	0.000385307
ENSMUSG00000024187	FAM234A	681.293	1.32741	0.251912	5.26933	1.3692e-07	9.89506e-06
ENSMUSG00000027947	IL6RA	176.408	1.32633	0.46711	2.83945	0.00451917	0.0440903
ENSMUSG00000044468	FAM46C	108.632	1.32297	0.41072	3.2211	0.00127701	0.0167032
ENSMUSG00000026663	ATF6	2094.95	1.32185	0.252048	5.24443	1.56763e-07	1.12347e-05
ENSMUSG00000044968	NAPEPLD	119.697	1.32028	0.311922	4.23273	2.30867e-05	0.000742226
ENSMUSG00000053646	PLXNB1	247.27	1.31997	0.325029	4.06108	4.8846e-05	0.00137956
ENSMUSG00000026672	OPTN	25.7007	1.31755	0.430029	3.06386	0.002185	0.0255506
ENSMUSG00000038936	SCCPDH	127.858	1.31724	0.40087	3.28596	0.00101636	0.0141894
ENSMUSG00000043953	CCRL2	48.0895	1.31538	0.401024	3.28006	0.00103785	0.0144309
ENSMUSG00000068551	ZFP467	364.246	1.31497	0.310738	4.23177	2.31861e-05	0.000742646
ENSMUSG00000031214	OPHN1	20.9498	1.31287	0.462292	2.83992	0.00451248	0.0440742
ENSMUSG00000096188	CMTM4	510.372	1.31274	0.167421	7.84096	4.47107e-15	2.4032e-12
ENSMUSG00000034028	CD226	606.998	1.31236	0.428187	3.06493	0.00217724	0.0255434
ENSMUSG00000028550	ATG4C	148.869	1.31229	0.352405	3.72383	0.000196226	0.00401319
ENSMUSG00000072437	NANOS1	277.834	1.30895	0.202299	6.47038	9.77572e-11	2.15567e-08
ENSMUSG00000067629	SYNGAP1	181.8	1.30525	0.327919	3.98039	6.88028e-05	0.00180398
ENSMUSG00000032076	CADM1	61.5	1.29903	0.394341	3.29417	0.000987124	0.0139168
ENSMUSG00000031799	TPM4	6746.58	1.29476	0.273665	4.73119	2.23206e-06	0.000106054
ENSMUSG00000044197	GPR146	1568.56	1.29462	0.294062	4.40255	1.06984e-05	0.000390686
ENSMUSG00000038068	RNF144B	74.7981	1.29289	0.383844	3.36827	0.00075641	0.0112545
ENSMUSG00000035578	IQCG	73.2835	1.28945	0.326351	3.95113	7.77826e-05	0.00199086
ENSMUSG00000050138	KCNK12	62.0554	1.2884	0.46171	2.79051	0.00526256	0.049164
ENSMUSG00000040734	PPP1R13L	204.891	1.28725	0.284011	4.5324	5.83172e-06	0.000231119
ENSMUSG00000022102	DOK2	4626.03	1.28671	0.290025	4.43654	9.14148e-06	0.000342557
ENSMUSG00000024610	CD74	1265.79	1.28653	0.330539	3.89222	9.93329e-05	0.00237715
ENSMUSG00000051537	GM5124	69.3388	1.28614	0.396273	3.24558	0.0011721	0.0156159
ENSMUSG00000035275	RAVER2	272.748	1.28579	0.433726	2.96451	0.00303162	0.0326103
ENSMUSG00000066647	GM5113	234.262	1.2855	0.201044	6.39409	1.61508e-10	3.26816e-08
ENSMUSG00000027555	CAR13	51.2484	1.28132	0.352667	3.63324	0.000279889	0.00534306
ENSMUSG00000034394	LIF	774.555	1.28123	0.419342	3.05535	0.00224802	0.0261384
ENSMUSG00000037108	ZCWPW1	1008.46	1.27768	0.221432	5.77009	7.92308e-09	8.96559e-07
ENSMUSG00000038637	LRRC56	113.954	1.27624	0.29652	4.30406	1.67694e-05	0.000576867
ENSMUSG00000032192	GNB5	45.6848	1.27617	0.398718	3.20069	0.00137097	0.0176767
ENSMUSG00000046410	KCNK6	46.1914	1.27567	0.332336	3.83851	0.000123786	0.00286171
ENSMUSG00000051074	4930579K19RIK	26.942	1.2753	0.355089	3.59148	0.000328802	0.0060036
ENSMUSG00000021376	TPMT	64.7956	1.27508	0.333135	3.82753	0.000129434	0.00293937
ENSMUSG00000063382	BCL9L	3642.4	1.27252	0.288841	4.40561	1.05488e-05	0.00038769
ENSMUSG00000042659	ARRDC4	479.612	1.26772	0.275319	4.60454	4.13376e-06	0.000176428
ENSMUSG00000007837	PRRG2	111.28	1.26375	0.284269	4.44562	8.76393e-06	0.000330569
ENSMUSG00000022263	TRIO	477.099	1.25909	0.27625	4.55781	5.16905e-06	0.000210184
ENSMUSG00000025486	SIRT3	655.124	1.25885	0.230988	5.44985	5.04111e-08	4.33536e-06
ENSMUSG00000105504	GBP5	727.895	1.2519	0.31661	3.95406	7.68357e-05	0.00197545
ENSMUSG00000037940	INPP4B	1454.28	1.24806	0.410419	3.04095	0.00235833	0.0270912
ENSMUSG00000019088	DNASE1L1	165.17	1.244	0.218736	5.68724	1.29111e-08	1.36129e-06
ENSMUSG00000062861	ZFP28	201.8	1.23908	0.270042	4.58847	4.46505e-06	0.000188233
ENSMUSG00000022912	PROS1	45.9391	1.2361	0.333213	3.70964	0.000207555	0.00420519
ENSMUSG00000035376	HACD2	545.215	1.23293	0.137278	8.98125	2.67708e-19	3.83714e-16
ENSMUSG00000000732	ICOSL	385.678	1.23051	0.286059	4.30158	1.69584e-05	0.000581044
ENSMUSG00000091472	GM3739	22.1227	1.21927	0.420511	2.89949	0.00373769	0.0382541
ENSMUSG00000033720	SFXN5	45.1096	1.21623	0.389498	3.12256	0.00179287	0.0220267
ENSMUSG00000044072	EML6	80.0846	1.21077	0.410543	2.94921	0.00318591	0.0337217
ENSMUSG00000048807	SLC35E4	140.913	1.21014	0.355181	3.40711	0.000656536	0.010155
ENSMUSG00000082292	GM12250	734.54	1.20975	0.402561	3.00515	0.00265454	0.0294949
ENSMUSG00000048478	SPATA33	26.4976	1.20872	0.431468	2.80141	0.00508797	0.0479524
ENSMUSG00000025790	SLCO3A1	691.844	1.20314	0.229949	5.23222	1.6749e-07	1.18552e-05
ENSMUSG00000061740	CYP2D22	53.5911	1.20115	0.349151	3.4402	0.000581281	0.00923179
ENSMUSG00000030380	MZF1	64.0647	1.19888	0.268636	4.46285	8.08749e-06	0.000306398
ENSMUSG00000010751	TNFRSF22	239.447	1.19848	0.226781	5.28473	1.25891e-07	9.21412e-06
ENSMUSG00000022722	ARL6	71.3091	1.19747	0.397251	3.01439	0.00257499	0.028741
ENSMUSG00000022500	LITAF	496.365	1.19714	0.364317	3.28599	0.00101625	0.0141894
ENSMUSG00000004565	PNPLA6	847.778	1.19536	0.181721	6.57804	4.76697e-11	1.09322e-08
ENSMUSG00000107741	GM2011	47.2461	1.18967	0.390281	3.04825	0.00230182	0.0265713
ENSMUSG00000096655	1700065D16RIK	55.936	1.18639	0.33345	3.55794	0.000373778	0.00658124
ENSMUSG00000027784	PPM1L	1405.99	1.18274	0.184374	6.41488	1.40937e-10	2.92062e-08
ENSMUSG00000052572	DLG2	32.1225	1.18038	0.382317	3.08744	0.00201889	0.0240478
ENSMUSG00000073987	GGH	372.304	1.18	0.294708	4.00395	6.22932e-05	0.00167152
ENSMUSG00000036002	FAM214B	327.919	1.1748	0.3345	3.51212	0.000444546	0.00754062
ENSMUSG00000033863	KLF9	216.39	1.17422	0.275749	4.25828	2.06008e-05	0.000681914
ENSMUSG00000024232	BAMBI	147.465	1.17265	0.347868	3.37098	0.000749017	0.011193
ENSMUSG00000031565	FGFR1	432.057	1.17189	0.308842	3.79446	0.000147964	0.00326698
ENSMUSG00000022892	APP	80.7331	1.17109	0.297614	3.93493	8.32202e-05	0.00208451
ENSMUSG00000102059	GM20257	102.657	1.16856	0.285888	4.08748	4.36084e-05	0.0012522
ENSMUSG00000028690	MMACHC	614.682	1.16552	0.167587	6.95474	3.53216e-12	1.12506e-09
ENSMUSG00000038304	CD160	1544.95	1.16552	0.402538	2.89542	0.00378651	0.0385479
ENSMUSG00000030107	USP18	1503.28	1.16053	0.383993	3.02227	0.00250888	0.028272
ENSMUSG00000048720	TBC1D12	40.922	1.15881	0.306649	3.77894	0.000157498	0.0034161
ENSMUSG00000043154	PPP2R3A	297.035	1.15785	0.25348	4.5678	4.92867e-06	0.000202078
ENSMUSG00000071648	ROM1	296.79	1.15746	0.333376	3.47195	0.000516702	0.00843194
ENSMUSG00000019866	AIM1	189.242	1.15445	0.392035	2.94475	0.00323215	0.0340458
ENSMUSG00000038260	TRPM4	56.4988	1.15144	0.364597	3.15811	0.00158794	0.0199079
ENSMUSG00000020689	ITGB3	6785.22	1.14727	0.382398	3.00019	0.00269808	0.0298053
ENSMUSG00000037020	WDR62	737.742	1.14443	0.29883	3.8297	0.000128299	0.00292543
ENSMUSG00000055150	ZFP78	57.7099	1.1419	0.329317	3.46749	0.000525352	0.00853476
ENSMUSG00000013698	PEA15A	832.48	1.13983	0.377463	3.01971	0.00253014	0.0284248
ENSMUSG00000061751	KALRN	86.834	1.13868	0.297944	3.82179	0.000132489	0.00299057
ENSMUSG00000097908	4933404O12RIK	728.861	1.13854	0.365207	3.11753	0.00182371	0.0223052
ENSMUSG00000020808	FAM64A	686.129	1.13192	0.327948	3.45151	0.000557449	0.00892749
ENSMUSG00000047371	ZFP768	284.529	1.13084	0.303595	3.72482	0.000195455	0.00400694
ENSMUSG00000029499	PXMP2	111.611	1.1293	0.287027	3.93447	8.33805e-05	0.00208451
ENSMUSG00000049191	RGAG4	71.7768	1.12759	0.289018	3.90146	9.56162e-05	0.00231838
ENSMUSG00000085282	GM15663	25.6913	1.12657	0.343244	3.28213	0.00103025	0.0143485
ENSMUSG00000053819	CAMK2D	2309.07	1.12578	0.207738	5.41924	5.98513e-08	4.99965e-06
ENSMUSG00000015202	CNKSR3	593.195	1.12514	0.258798	4.34754	1.37671e-05	0.00048227
ENSMUSG00000050192	EIF5A2	319.622	1.1231	0.290111	3.87127	0.000108268	0.00255098
ENSMUSG00000046798	CLDN12	94.5128	1.12292	0.319863	3.51062	0.000447059	0.00757579
ENSMUSG00000068747	SORT1	1867.49	1.11891	0.26277	4.25811	2.0616e-05	0.000681914
ENSMUSG00000068740	CELSR2	526.617	1.11626	0.236473	4.72044	2.3533e-06	0.000109102
ENSMUSG00000011267	ZFP296	40.8187	1.11483	0.388656	2.86842	0.00412523	0.0411565
ENSMUSG00000087038	2900079G21RIK	799.895	1.11242	0.251643	4.42065	9.84028e-06	0.000366335
ENSMUSG00000024754	TMEM2	155.682	1.10721	0.217954	5.08001	3.77419e-07	2.36059e-05
ENSMUSG00000049321	ZFP2	92.3982	1.10692	0.395047	2.80199	0.00507888	0.0479263
ENSMUSG00000038437	MLLT6	5114.96	1.10634	0.288358	3.83667	0.000124714	0.00286775
ENSMUSG00000051851	CXX1C	204.289	1.10405	0.330532	3.34024	0.000837069	0.0122533
ENSMUSG00000048911	RNF24	213.966	1.10264	0.243186	4.53414	5.78382e-06	0.00022975
ENSMUSG00000071064	ZFP827	668.87	1.09736	0.323915	3.3878	0.000704568	0.0106303
ENSMUSG00000002083	BBC3	309.925	1.09643	0.303875	3.60816	0.000308377	0.00573415
ENSMUSG00000023905	TNFRSF12A	58.9153	1.09628	0.290654	3.77177	0.000162091	0.00349808
ENSMUSG00000030309	CAPRIN2	213.737	1.09571	0.190037	5.76574	8.12997e-09	9.08023e-07
ENSMUSG00000048406	B330016D10RIK	131.186	1.09475	0.216011	5.06803	4.01962e-07	2.50498e-05
ENSMUSG00000005951	SHPK	230.841	1.08968	0.205201	5.31032	1.09433e-07	8.18615e-06
ENSMUSG00000025762	LARP1B	543.448	1.08875	0.168404	6.46511	1.01225e-10	2.20388e-08
ENSMUSG00000021003	GALC	429.393	1.08646	0.127866	8.49689	1.94735e-17	1.76286e-14
ENSMUSG00000106978	N4BP2OS	51.3946	1.08333	0.276764	3.91427	9.06776e-05	0.0022249
ENSMUSG00000031563	WWC2	362.926	1.08193	0.181423	5.96357	2.46793e-09	3.24034e-07
ENSMUSG00000000278	SCPEP1	367.699	1.08082	0.301063	3.59002	0.00033065	0.00602121
ENSMUSG00000037419	ENDOD1	610.899	1.07669	0.331611	3.24685	0.0011669	0.0155813
ENSMUSG00000032417	RWDD2A	58.7445	1.07542	0.317159	3.39079	0.000696923	0.0105706
ENSMUSG00000054945	GM9958	61.0249	1.0752	0.313667	3.42783	0.000608417	0.00953944
ENSMUSG00000037434	SLC30A1	430.083	1.07425	0.270222	3.97544	7.02494e-05	0.00183352
ENSMUSG00000066175	2510046G10RIK	139.157	1.07383	0.287544	3.73448	0.000188102	0.00389802
ENSMUSG00000026826	NR4A2	161.562	1.07179	0.360431	2.97362	0.00294309	0.0317972
ENSMUSG00000063077	KIF1B	894.718	1.07157	0.345004	3.10596	0.0018966	0.0229567
ENSMUSG00000061393	ACVR2B	103.956	1.07086	0.368109	2.90907	0.00362507	0.0374482
ENSMUSG00000100975	GM28875	178.451	1.06972	0.221448	4.83058	1.36134e-06	7.16058e-05
ENSMUSG00000048644	CTXN1	318.331	1.06653	0.271281	3.93144	8.44393e-05	0.00210182
ENSMUSG00000042759	APOBR	521.975	1.0644	0.361318	2.94589	0.00322032	0.0340021
ENSMUSG00000056413	ADAP1	412.79	1.06186	0.369138	2.87658	0.0040201	0.0402478
ENSMUSG00000020230	PRMT2	296.453	1.06085	0.364799	2.90803	0.00363709	0.0375273
ENSMUSG00000038393	TXNIP	18013.2	1.06071	0.214093	4.95445	7.25338e-07	4.18651e-05
ENSMUSG00000058715	FCER1G	189.067	1.05949	0.355274	2.98218	0.00286202	0.0311427
ENSMUSG00000026893	GCA	33.0652	1.05919	0.319313	3.3171	0.000909572	0.0130047
ENSMUSG00000028460	SIT1	908.774	1.05875	0.237172	4.46407	8.04167e-06	0.000305335
ENSMUSG00000098702	1500015A07RIK	230.292	1.05872	0.156267	6.77508	1.2434e-11	3.39469e-09
ENSMUSG00000096056	GM21986	58.9808	1.0583	0.251433	4.2091	2.56392e-05	0.00081065
ENSMUSG00000032890	RIMS3	92.6266	1.05796	0.26769	3.95219	7.74404e-05	0.00198506
ENSMUSG00000036699	ZCCHC12	353.183	1.05712	0.367946	2.87304	0.00406536	0.04063
ENSMUSG00000051615	RAP2A	584.282	1.05595	0.231859	4.55427	5.25687e-06	0.000211752
ENSMUSG00000035285	NAT14	50.0656	1.05437	0.281847	3.74094	0.000183334	0.00380839
ENSMUSG00000041025	IFFO2	318.619	1.05384	0.315725	3.33784	0.000844334	0.0123057
ENSMUSG00000092486	2610524H06RIK	709.886	1.05297	0.309835	3.39849	0.000677599	0.010406
ENSMUSG00000060550	H2-Q7	17388.5	1.05294	0.260497	4.04205	5.29867e-05	0.00146883
ENSMUSG00000026880	STOM	729.789	1.05251	0.291898	3.60576	0.000311236	0.00575619
ENSMUSG00000037594	BC022687	105.351	1.05237	0.279687	3.76268	0.000168099	0.00358278
ENSMUSG00000074826	GM10767	55.0243	1.04257	0.350938	2.97081	0.00297017	0.0320295
ENSMUSG00000097487	PTGES3L	40.6695	1.03981	0.359935	2.88889	0.00386607	0.0390696
ENSMUSG00000044465	FAM160A2	653.861	1.03605	0.242356	4.27491	1.91216e-05	0.000639865
ENSMUSG00000028914	CASP9	574.605	1.03462	0.180667	5.72667	1.02421e-08	1.10795e-06
ENSMUSG00000039873	NEURL2	85.5557	1.03099	0.318775	3.23421	0.00121979	0.0161234
ENSMUSG00000030156	CD69	2429.08	1.02187	0.306675	3.33208	0.000862003	0.0124803
ENSMUSG00000076617	IGHM	9858.42	1.02104	0.180799	5.64739	1.62898e-08	1.64815e-06
ENSMUSG00000019832	RAB32	313.303	1.01955	0.22633	4.50469	6.64686e-06	0.000259242
ENSMUSG00000039328	RNF122	665.657	1.01923	0.348345	2.92591	0.00343448	0.0356937
ENSMUSG00000028413	B4GALT1	3982.21	1.01921	0.206224	4.94224	7.72309e-07	4.42791e-05
ENSMUSG00000045975	C2CD2	678.26	1.01773	0.124745	8.15845	3.39352e-16	2.08459e-13
ENSMUSG00000063145	BBS5	50.9366	1.01478	0.30271	3.3523	0.000801428	0.0118322
ENSMUSG00000013089	ETV5	5607.81	1.01313	0.310952	3.25817	0.00112135	0.0151987
ENSMUSG00000063954	HIST2H2AA2	493.799	1.0119	0.288921	3.50234	0.000461191	0.00775414
ENSMUSG00000020021	FGD6	264.219	1.00395	0.224278	4.47636	7.59278e-06	0.000290859
ENSMUSG00000039787	CERCAM	467.771	1.00171	0.204111	4.90765	9.2174e-07	5.14738e-05
ENSMUSG00000086841	2410006H16RIK	3782.52	0.995513	0.210885	4.72065	2.35088e-06	0.000109102
ENSMUSG00000031847	1700030J22RIK	27.1031	0.99246	0.354643	2.79848	0.00513443	0.0482581
ENSMUSG00000061603	AKAP6	517.115	0.99043	0.346705	2.8567	0.00428076	0.0424026
ENSMUSG00000031227	MAGEE1	298.044	0.990034	0.246	4.02453	5.70886e-05	0.00155689
ENSMUSG00000026792	LRSAM1	339.287	0.989649	0.214271	4.61869	3.86173e-06	0.000167732
ENSMUSG00000034917	TJP3	1336.27	0.987609	0.206555	4.78135	1.74124e-06	8.68098e-05
ENSMUSG00000036295	LRRN3	214.201	0.984731	0.285907	3.44423	0.000572687	0.00911213
ENSMUSG00000067199	FRAT1	487.921	0.981712	0.210126	4.67202	2.98248e-06	0.000134289
ENSMUSG00000043931	GIMAP7	848.484	0.980586	0.331313	2.9597	0.00307938	0.0330207
ENSMUSG00000034171	FAAH	1637.86	0.975275	0.235876	4.13469	3.5543e-05	0.00104503
ENSMUSG00000048232	FBXO10	187.589	0.973875	0.277715	3.50675	0.000453621	0.00766229
ENSMUSG00000019320	NOXO1	31.7323	0.973555	0.33261	2.92702	0.00342224	0.0356232
ENSMUSG00000058755	OSM	654.357	0.971998	0.300085	3.23908	0.00119916	0.0159148
ENSMUSG00000062380	TUBB3	1448.8	0.970185	0.284323	3.41227	0.000644249	0.00999525
ENSMUSG00000041075	FZD7	252.4	0.969807	0.325255	2.98168	0.0028667	0.0311594
ENSMUSG00000032875	ARHGEF17	116.693	0.968534	0.344183	2.81401	0.00489277	0.046572
ENSMUSG00000099689	ZFP383	165.158	0.967373	0.265542	3.64301	0.000269468	0.00517789
ENSMUSG00000028101	PIAS3	612.848	0.965917	0.255969	3.77357	0.000160928	0.00347734
ENSMUSG00000036046	5031439G07RIK	614.427	0.964578	0.174841	5.51688	3.45069e-08	3.14031e-06
ENSMUSG00000025026	ADD3	3971.3	0.960225	0.306526	3.13261	0.00173259	0.0214547
ENSMUSG00000025277	ABHD6	232.432	0.958753	0.282225	3.39713	0.000680971	0.0104391
ENSMUSG00000051427	CCDC157	256.507	0.952787	0.275409	3.45954	0.000541096	0.00872245
ENSMUSG00000052658	5830454E08RIK	81.2416	0.95225	0.270571	3.51941	0.000432509	0.0073728
ENSMUSG00000027177	HIPK3	1690.29	0.951377	0.2401	3.96243	7.41909e-05	0.00191604
ENSMUSG00000026556	VANGL2	1050.97	0.951043	0.2439	3.89932	9.64648e-05	0.00233361
ENSMUSG00000032344	MB21D1	485.249	0.950491	0.283468	3.35308	0.000799181	0.0118194
ENSMUSG00000038524	FCHSD1	814.085	0.949461	0.23139	4.1033	4.07297e-05	0.00117938
ENSMUSG00000054434	TMEM120B	669.952	0.949292	0.187697	5.05757	4.24625e-07	2.61776e-05
ENSMUSG00000030811	FBXL19	2196.51	0.94389	0.166356	5.67393	1.39556e-08	1.42034e-06
ENSMUSG00000090115	USP49	987.521	0.942829	0.189084	4.9863	6.15468e-07	3.61299e-05
ENSMUSG00000057103	NAT8F1	143.209	0.94	0.267245	3.51738	0.000435836	0.00741482
ENSMUSG00000043807	LY6G5B	84.6085	0.93968	0.33175	2.83249	0.00461868	0.0446551
ENSMUSG00000028199	CRYZ	175.787	0.939463	0.284043	3.30747	0.000941436	0.0133493
ENSMUSG00000001156	MXD1	901.323	0.938215	0.224094	4.1867	2.83041e-05	0.00086779
ENSMUSG00000024799	TM7SF2	510.876	0.937074	0.193601	4.84023	1.29688e-06	6.84242e-05
ENSMUSG00000061411	NOL4L	291.483	0.936863	0.1818	5.15326	2.55998e-07	1.69352e-05
ENSMUSG00000024958	GPR137	506.847	0.93362	0.214099	4.3607	1.29648e-05	0.000459782
ENSMUSG00000045867	CRADD	292.336	0.933418	0.171973	5.42771	5.70812e-08	4.84028e-06
ENSMUSG00000025193	CUTC	393.057	0.932219	0.184098	5.0637	4.11207e-07	2.55334e-05
ENSMUSG00000029924	SLC37A3	1135.19	0.931037	0.244365	3.81002	0.000138955	0.00309991
ENSMUSG00000028977	CASZ1	166.07	0.928703	0.316854	2.93102	0.00337855	0.035283
ENSMUSG00000053964	LGALS4	80.4023	0.927808	0.311306	2.98037	0.002879	0.0312618
ENSMUSG00000021009	PTPN21	135.467	0.926381	0.297073	3.11836	0.00181859	0.0222815
ENSMUSG00000050855	ZFP940	466.788	0.925554	0.125965	7.34771	2.01627e-13	9.12628e-11
ENSMUSG00000015452	AGER	58.9613	0.925215	0.31625	2.92558	0.00343814	0.0357102
ENSMUSG00000031398	PLXNA3	467.92	0.924193	0.241325	3.82966	0.000128323	0.00292543
ENSMUSG00000038170	PDE4DIP	1150.45	0.920535	0.144798	6.35736	2.05255e-10	3.90109e-08
ENSMUSG00000018334	KSR1	1309.31	0.917239	0.176621	5.19325	2.0665e-07	1.42175e-05
ENSMUSG00000026525	OPN3	44.63	0.911493	0.300153	3.03676	0.00239136	0.0273117
ENSMUSG00000031367	AP1S2	530.448	0.908778	0.26579	3.41915	0.000628161	0.00976887
ENSMUSG00000015597	ZFP318	991.93	0.907818	0.258868	3.50687	0.00045341	0.00766229
ENSMUSG00000103088	PCDHGB6	83.8739	0.907183	0.300179	3.02214	0.00250997	0.028272
ENSMUSG00000037405	ICAM1	1100.85	0.906847	0.1858	4.88078	1.0567e-06	5.7699e-05
ENSMUSG00000049858	SUOX	1716.94	0.900989	0.224697	4.00979	6.07731e-05	0.0016384
ENSMUSG00000095105	EDARADD	703.248	0.900297	0.301712	2.98396	0.00284543	0.0310936
ENSMUSG00000056592	ZFP658	397.237	0.899612	0.168409	5.34183	9.2011e-08	7.22643e-06
ENSMUSG00000068854	HIST2H2BE	687.192	0.896651	0.247761	3.61901	0.000295729	0.00554694
ENSMUSG00000035062	ZC4H2	424.583	0.894619	0.173924	5.14374	2.6932e-07	1.76805e-05
ENSMUSG00000029095	ABLIM2	222.595	0.892769	0.315004	2.83415	0.00459478	0.0445491
ENSMUSG00000021025	NFKBIA	3237.81	0.891129	0.219036	4.06841	4.73351e-05	0.0013435
ENSMUSG00000012889	PODNL1	807.028	0.890295	0.243534	3.65573	0.000256449	0.0049841
ENSMUSG00000039206	DAGLB	213.557	0.889615	0.236672	3.75885	0.000170696	0.00361359
ENSMUSG00000051590	MAP3K19	134.817	0.889263	0.247276	3.59624	0.000322847	0.0059074
ENSMUSG00000024677	MS4A6B	8795.65	0.88584	0.258342	3.42894	0.000605939	0.00951795
ENSMUSG00000024190	DUSP1	429.853	0.88548	0.188627	4.69435	2.67456e-06	0.000122347
ENSMUSG00000099632	2900093K20RIK	68.3663	0.883648	0.305003	2.89718	0.00376538	0.0384005
ENSMUSG00000032558	NPHP3	50.228	0.880941	0.310637	2.83592	0.00456944	0.044417
ENSMUSG00000057093	ZFP607B	83.0919	0.87905	0.280394	3.13505	0.00171822	0.0213074
ENSMUSG00000008855	HDAC5	1241.48	0.878364	0.222853	3.94144	8.09934e-05	0.00204866
ENSMUSG00000016526	DYRK3	212.72	0.877697	0.294374	2.98157	0.00286776	0.0311594
ENSMUSG00000037692	AHDC1	2516.26	0.872131	0.245848	3.54744	0.000388993	0.00678132
ENSMUSG00000015944	GATSL2	1364.57	0.87142	0.225813	3.85904	0.000113835	0.00266751
ENSMUSG00000034800	ZFP661	168.75	0.8689	0.222934	3.89756	9.71668e-05	0.00234275
ENSMUSG00000017405	NEK8	487.876	0.868131	0.201674	4.30462	1.67273e-05	0.000576867
ENSMUSG00000038351	SGSM2	648.507	0.863832	0.189779	4.55179	5.31918e-06	0.000213762
ENSMUSG00000048012	ZFP473	96.5845	0.862297	0.297999	2.89362	0.00380826	0.0386872
ENSMUSG00000041000	TRIM62	314.272	0.862087	0.203241	4.2417	2.21834e-05	0.000718559
ENSMUSG00000021591	GLRX	932.052	0.861439	0.281136	3.06413	0.00218301	0.0255506
ENSMUSG00000005968	TUFT1	113.449	0.854919	0.301721	2.83347	0.00460449	0.044568
ENSMUSG00000023755	RHEBL1	230.486	0.854739	0.15599	5.47947	4.2661e-08	3.78231e-06
ENSMUSG00000021127	ZFP36L1	3926.97	0.853947	0.180008	4.74395	2.09594e-06	0.000100418
ENSMUSG00000059540	TCEA2	115.452	0.851289	0.239951	3.54776	0.000388527	0.00678132
ENSMUSG00000043290	ZFP784	235.209	0.84917	0.185642	4.57422	4.77994e-06	0.000197632
ENSMUSG00000050394	ARMCX6	396.954	0.845667	0.204434	4.13663	3.52444e-05	0.0010398
ENSMUSG00000030522	MTMR10	312.632	0.841976	0.190543	4.41881	9.92436e-06	0.000367886
ENSMUSG00000021687	SCAMP1	299.926	0.838929	0.278264	3.01487	0.00257091	0.0287327
ENSMUSG00000032946	RASGRP2	5118.98	0.837819	0.222515	3.76523	0.000166399	0.0035642
ENSMUSG00000078851	HIST3H2A	674.924	0.836164	0.163248	5.12205	3.02235e-07	1.96168e-05
ENSMUSG00000078566	BNIP3	165.321	0.835048	0.276522	3.01983	0.00252918	0.0284248
ENSMUSG00000089945	PAKAP	707.747	0.834343	0.295409	2.82437	0.00473743	0.0454708
ENSMUSG00000078651	AOC2	167.577	0.832549	0.24507	3.39719	0.000680807	0.0104391
ENSMUSG00000028458	TESK1	1908.81	0.831129	0.221236	3.75675	0.000172135	0.00363248
ENSMUSG00000022075	RHOBTB2	2043.91	0.830611	0.209289	3.96873	7.2256e-05	0.00187735
ENSMUSG00000074738	FNDC10	558.592	0.828501	0.25165	3.29227	0.000993809	0.0139881
ENSMUSG00000036854	HSPB6	214.392	0.827573	0.225339	3.67258	0.000240118	0.00472543
ENSMUSG00000021240	ABCD4	290.341	0.827466	0.193072	4.28579	1.82089e-05	0.000615311
ENSMUSG00000003154	FOXJ2	1405.23	0.826862	0.216899	3.8122	0.000137736	0.0030807
ENSMUSG00000074480	MEX3A	4064.01	0.826641	0.114566	7.2154	5.37743e-13	2.20364e-10
ENSMUSG00000025171	UBTD1	455.073	0.825547	0.240412	3.43389	0.00059499	0.00940609
ENSMUSG00000056708	IER5	1059.57	0.822314	0.176818	4.65064	3.30909e-06	0.000146315
ENSMUSG00000001313	RND2	152.446	0.820209	0.243354	3.37043	0.000750504	0.0111957
ENSMUSG00000044244	IL20RB	86.9973	0.818544	0.235372	3.47766	0.000505816	0.00828576
ENSMUSG00000019960	DUSP6	1515.43	0.814558	0.288916	2.81936	0.00481193	0.0460062
ENSMUSG00000002393	NR2F6	384.26	0.814048	0.258837	3.14502	0.00166075	0.0207143
ENSMUSG00000014837	4931428F04RIK	724.897	0.81403	0.131551	6.18794	6.09539e-10	1.03669e-07
ENSMUSG00000000134	TFE3	1402.18	0.813798	0.201695	4.0348	5.46484e-05	0.00150633
ENSMUSG00000017615	TNFAIP1	895.909	0.812827	0.132737	6.12359	9.14883e-10	1.43054e-07
ENSMUSG00000002105	SLC39A13	208.668	0.812522	0.249559	3.25583	0.0011306	0.015252
ENSMUSG00000097403	9230116N13RIK	81.3416	0.807105	0.239078	3.37591	0.00073571	0.011051
ENSMUSG00000048878	HEXIM1	3042.01	0.804949	0.125044	6.43734	1.21585e-10	2.58181e-08
ENSMUSG00000053198	PRX	320.238	0.803562	0.258185	3.11235	0.00185604	0.022609
ENSMUSG00000051950	B3GLCT	397.373	0.803117	0.173881	4.61878	3.8601e-06	0.000167732
ENSMUSG00000097059	FAM120AOS	198.956	0.800784	0.190751	4.19805	2.69226e-05	0.000837376
ENSMUSG00000025077	DCLRE1A	168.853	0.799094	0.246138	3.24654	0.00116819	0.0155813
ENSMUSG00000061119	PRCP	677.002	0.799093	0.231375	3.45367	0.000553014	0.00886472
ENSMUSG00000020668	KIF3C	1362.37	0.797088	0.163808	4.866	1.13882e-06	6.15449e-05
ENSMUSG00000044952	KCTD21	120.685	0.796429	0.230524	3.45486	0.000550569	0.00885046
ENSMUSG00000079427	MTHFSL	349.831	0.796141	0.185945	4.28161	1.8555e-05	0.000624551
ENSMUSG00000034993	VAT1	4878.66	0.795887	0.187826	4.23736	2.26161e-05	0.000731198
ENSMUSG00000072825	CEP170B	610.828	0.795711	0.233932	3.40147	0.000670251	0.0103378
ENSMUSG00000039166	AKAP7	87.6752	0.791975	0.260771	3.03705	0.00238908	0.0273038
ENSMUSG00000059791	NRM	1114.53	0.79121	0.275225	2.87477	0.00404316	0.0404551
ENSMUSG00000019952	POC1B	1075.29	0.788858	0.110602	7.13241	9.86259e-13	3.46197e-10
ENSMUSG00000047777	PHF13	855.582	0.787747	0.147199	5.35157	8.71945e-08	6.91127e-06
ENSMUSG00000037573	TOB1	343.713	0.786802	0.233713	3.36654	0.000761176	0.0113157
ENSMUSG00000044813	SHB	107.65	0.786754	0.195852	4.01709	5.89213e-05	0.00160102
ENSMUSG00000007777	0610009B22RIK	414.763	0.786365	0.183194	4.29253	1.76647e-05	0.00060046
ENSMUSG00000100594	2810414N06RIK	58.3501	0.784545	0.276681	2.83556	0.00457451	0.044417
ENSMUSG00000051517	ARHGEF39	374.644	0.783103	0.209781	3.73296	0.000189244	0.00391226
ENSMUSG00000024136	DNASE1L2	104.367	0.782006	0.260488	3.00208	0.00268143	0.0296786
ENSMUSG00000044641	PARD6B	132.09	0.779186	0.187777	4.14954	3.33148e-05	0.000989663
ENSMUSG00000027663	ZMAT3	407.558	0.777646	0.257855	3.01583	0.00256276	0.0287162
ENSMUSG00000060216	ARRB2	6218.4	0.776963	0.251535	3.08889	0.00200905	0.023997
ENSMUSG00000064105	CNNM2	251.125	0.776805	0.199025	3.90306	9.49845e-05	0.00230753
ENSMUSG00000046567	4930430F08RIK	278.625	0.771664	0.207566	3.71768	0.000201058	0.00409738
ENSMUSG00000108435	GM45051	215.235	0.767692	0.232125	3.30723	0.000942236	0.0133496
ENSMUSG00000017718	AFMID	419.155	0.767174	0.254442	3.01513	0.00256873	0.0287327
ENSMUSG00000025795	RASSF3	646.686	0.766643	0.226689	3.38191	0.000719837	0.0108322
ENSMUSG00000066278	VPS37B	2519.45	0.761848	0.233989	3.25592	0.00113027	0.015252
ENSMUSG00000054484	TMEM62	270.352	0.761635	0.208098	3.65999	0.000252226	0.00490757
ENSMUSG00000044991	1110034G24RIK	242.401	0.760198	0.263118	2.88919	0.0038624	0.0390554
ENSMUSG00000021257	ANGEL1	382.482	0.759419	0.269198	2.82104	0.00478683	0.0458683
ENSMUSG00000035596	MBOAT7	2645.43	0.759151	0.159282	4.76608	1.87842e-06	9.25755e-05
ENSMUSG00000107121	1110006O24RIK	60.268	0.757061	0.246637	3.06954	0.0021439	0.0252569
ENSMUSG00000059316	SLC27A4	1158.28	0.756652	0.181378	4.17168	3.0236e-05	0.000912385
ENSMUSG00000058317	UBE2E2	139.314	0.755616	0.248546	3.04014	0.00236464	0.0271146
ENSMUSG00000040390	MAP3K10	691.043	0.753913	0.199233	3.78408	0.000154281	0.00336328
ENSMUSG00000026819	SLC25A25	890.228	0.753354	0.14414	5.22653	1.72721e-07	1.21257e-05
ENSMUSG00000041189	CHRNB1	151.273	0.751936	0.243245	3.09127	0.001993	0.0239049
ENSMUSG00000031983	2310022B05RIK	550.052	0.751466	0.208477	3.60454	0.000312703	0.00576566
ENSMUSG00000037339	FAM53A	1959.38	0.748749	0.143986	5.20016	1.99117e-07	1.38657e-05
ENSMUSG00000025374	NABP2	1826.49	0.747305	0.232685	3.21166	0.00131971	0.0171702
ENSMUSG00000030583	SIPA1L3	1373.64	0.747225	0.158586	4.71181	2.45529e-06	0.000113524
ENSMUSG00000066838	ZFP772	207.565	0.746106	0.179629	4.1536	3.27279e-05	0.00097391
ENSMUSG00000002983	RELB	955.211	0.745673	0.238635	3.12475	0.00177959	0.0219105
ENSMUSG00000034574	DAAM1	258.569	0.74408	0.241148	3.08558	0.00203159	0.0241655
ENSMUSG00000027007	SSFA2	961.045	0.742918	0.17779	4.17862	2.9328e-05	0.000892817
ENSMUSG00000039145	CAMK1D	1492.58	0.742489	0.193634	3.83449	0.000125826	0.00288176
ENSMUSG00000001420	TMEM79	69.9127	0.741508	0.263958	2.80919	0.00496664	0.0471447
ENSMUSG00000070425	XNTRPC	149.156	0.740646	0.262903	2.81718	0.00484475	0.046166
ENSMUSG00000024777	PPP2R5B	696.593	0.7393	0.223448	3.30861	0.000937617	0.0133086
ENSMUSG00000026797	STXBP1	399.529	0.738271	0.210695	3.50397	0.000458372	0.00772941
ENSMUSG00000034640	TIPARP	539.97	0.738168	0.224557	3.28721	0.00101184	0.0141493
ENSMUSG00000046982	TSHZ1	1690.44	0.738123	0.138837	5.31648	1.05796e-07	8.08752e-06
ENSMUSG00000097167	GM16740	120.684	0.737619	0.226323	3.25914	0.00111749	0.0151849
ENSMUSG00000028161	PPP3CA	2184.77	0.734749	0.158838	4.62579	3.73172e-06	0.000163322
ENSMUSG00000028641	P3H1	393.872	0.733918	0.210729	3.48275	0.000496288	0.00816076
ENSMUSG00000028124	GCLM	728.48	0.73361	0.147366	4.97815	6.41951e-07	3.75563e-05
ENSMUSG00000026158	OGFRL1	991.12	0.733015	0.199498	3.67429	0.000238512	0.00470999
ENSMUSG00000050786	CCDC126	264.196	0.730831	0.23557	3.10239	0.00191963	0.0231883
ENSMUSG00000021196	PFKP	2605.61	0.726614	0.222622	3.2639	0.00109891	0.0150249
ENSMUSG00000066640	FBXL18	969.573	0.72413	0.173965	4.16249	3.1479e-05	0.000941632
ENSMUSG00000021902	PHF7	569.626	0.722852	0.124338	5.8136	6.11452e-09	7.30078e-07
ENSMUSG00000017707	SERINC3	28970.1	0.718277	0.191977	3.74148	0.000182938	0.00380475
ENSMUSG00000020097	SGPL1	2285.79	0.715283	0.180437	3.96417	7.36505e-05	0.00190495
ENSMUSG00000047604	FRAT2	2298.83	0.706508	0.142356	4.96295	6.94316e-07	4.03454e-05
ENSMUSG00000032402	SMAD3	7244.56	0.704037	0.21471	3.27901	0.00104171	0.0144683
ENSMUSG00000004748	MTFP1	166.367	0.703643	0.252897	2.78233	0.00539702	0.0499348
ENSMUSG00000041187	PRKD2	8795.8	0.701286	0.239337	2.93012	0.00338829	0.0353632
ENSMUSG00000020308	TPGS1	844.678	0.700945	0.250736	2.79555	0.00518114	0.0486174
ENSMUSG00000022514	IL1RAP	358.32	0.700546	0.214535	3.26541	0.00109305	0.0149924
ENSMUSG00000026489	COQ8A	660.636	0.699784	0.212091	3.29945	0.000968754	0.0136803
ENSMUSG00000034126	POMT2	725.572	0.698454	0.15949	4.3793	1.19062e-05	0.000428425
ENSMUSG00000073139	TMEM185A	804.155	0.698058	0.164559	4.24199	2.21544e-05	0.000718559
ENSMUSG00000018899	IRF1	5269.86	0.695794	0.157367	4.42147	9.80331e-06	0.000365763
ENSMUSG00000075254	HEG1	6735.13	0.694332	0.213577	3.25096	0.00115015	0.0154431
ENSMUSG00000057706	MEX3B	1827.94	0.693263	0.219523	3.15804	0.00158831	0.0199079
ENSMUSG00000028793	RNF19B	1784.05	0.692576	0.175843	3.93861	8.19539e-05	0.00205957
ENSMUSG00000026627	TMEM206	1040.13	0.691438	0.101784	6.79319	1.09682e-11	3.09266e-09
ENSMUSG00000069631	STRADA	1570.24	0.6858	0.159072	4.31126	1.6233e-05	0.000564054
ENSMUSG00000044447	DOCK5	451.083	0.683528	0.235936	2.89709	0.00376637	0.0384005
ENSMUSG00000035585	TSEN34	949.904	0.68208	0.204232	3.33973	0.000838593	0.0122549
ENSMUSG00000024137	E4F1	1257.13	0.681704	0.140593	4.84876	1.24236e-06	6.61568e-05
ENSMUSG00000034121	MKS1	253.289	0.679529	0.166576	4.0794	4.51519e-05	0.00129005
ENSMUSG00000020818	MFSD11	678.522	0.679335	0.120554	5.63511	1.7495e-08	1.7495e-06
ENSMUSG00000003382	ETV3	4369.86	0.678984	0.218046	3.11395	0.00184602	0.0225029
ENSMUSG00000054723	VMAC	1195.17	0.676671	0.201433	3.35929	0.000781428	0.0115767
ENSMUSG00000024620	PDGFRB	8040.89	0.6764	0.239942	2.81901	0.0048172	0.046031
ENSMUSG00000006019	DHX34	2211.78	0.67535	0.178625	3.78083	0.000156306	0.00339452
ENSMUSG00000079563	PGLYRP2	5381.36	0.671702	0.232885	2.88426	0.00392335	0.0393938
ENSMUSG00000032000	BIRC3	1082.71	0.671421	0.186316	3.60367	0.000313759	0.00576566
ENSMUSG00000022742	CPOX	849.543	0.670712	0.160587	4.17663	2.95862e-05	0.000899087
ENSMUSG00000029392	RILPL1	253.494	0.667689	0.218876	3.05054	0.00228433	0.0264049
ENSMUSG00000027809	ETFDH	2012.19	0.667588	0.120773	5.52764	3.24567e-08	2.96944e-06
ENSMUSG00000070691	RUNX3	4686.81	0.667173	0.237443	2.80983	0.00495679	0.0470772
ENSMUSG00000035929	H2-Q4	7746.17	0.665376	0.205755	3.23382	0.00122144	0.0161234
ENSMUSG00000034538	ZFP418	144.101	0.66476	0.21709	3.06214	0.00219758	0.0256434
ENSMUSG00000045282	TMEM86B	296.881	0.664679	0.225373	2.94925	0.0031855	0.0337217
ENSMUSG00000022358	FBXO32	753.413	0.664333	0.226576	2.93205	0.0033673	0.0352252
ENSMUSG00000035847	IDS	794.825	0.664201	0.207092	3.20728	0.00133998	0.0173944
ENSMUSG00000026708	CENPL	863.19	0.662047	0.237285	2.7901	0.00526923	0.0491756
ENSMUSG00000026782	ABI2	852.713	0.661172	0.201923	3.27438	0.00105895	0.0146179
ENSMUSG00000001630	STK38L	309.384	0.660399	0.157419	4.19516	2.72677e-05	0.000845846
ENSMUSG00000021809	NUDT13	302.204	0.659957	0.155796	4.23602	2.27518e-05	0.000734203
ENSMUSG00000051351	ZFP46	1063.09	0.659005	0.15056	4.37701	1.20318e-05	0.000432039
ENSMUSG00000028645	SLC2A1	918.277	0.656399	0.157687	4.16267	3.14554e-05	0.000941632
ENSMUSG00000039086	SS18L1	282.163	0.655656	0.210519	3.11447	0.00184273	0.0224787
ENSMUSG00000047379	B4GAT1	548.614	0.655571	0.129698	5.0546	4.31303e-07	2.64944e-05
ENSMUSG00000103906	TIGD5	209.023	0.651015	0.216827	3.00247	0.00267797	0.0296786
ENSMUSG00000035919	BBS9	852.046	0.647832	0.112621	5.75231	8.80346e-09	9.64455e-07
ENSMUSG00000023050	MAP3K12	566.633	0.645468	0.226281	2.8525	0.00433763	0.0428285
ENSMUSG00000058402	ZFP420	153.663	0.643576	0.231366	2.78164	0.00540849	0.0499871
ENSMUSG00000021033	GSTZ1	915.702	0.643393	0.165759	3.88149	0.000103817	0.00245957
ENSMUSG00000031959	WDR59	1151.62	0.641786	0.104447	6.14461	8.0159e-10	1.26489e-07
ENSMUSG00000048921	ZFP689	391.831	0.641151	0.117158	5.47252	4.43674e-08	3.91343e-06
ENSMUSG00000026709	DARS2	931.005	0.640727	0.163875	3.90985	9.23516e-05	0.00226275
ENSMUSG00000029521	CHEK2	459.175	0.638701	0.197442	3.23488	0.00121695	0.0161011
ENSMUSG00000107068	GM42742	1447.08	0.637892	0.1769	3.60594	0.000311031	0.00575619
ENSMUSG00000060681	SLC9A6	879.698	0.637054	0.140259	4.54198	5.5727e-06	0.000222908
ENSMUSG00000003380	RABAC1	2290.88	0.636621	0.213113	2.98725	0.002815	0.0308764
ENSMUSG00000060397	ZFP128	310.965	0.636213	0.183428	3.46846	0.000523443	0.00851771
ENSMUSG00000038497	TMCO3	578.017	0.633858	0.156544	4.04908	5.14194e-05	0.00143807
ENSMUSG00000040918	SLC19A2	159.471	0.63265	0.226398	2.79441	0.00519944	0.0487094
ENSMUSG00000056698	ELMOD3	758.231	0.632029	0.179508	3.5209	0.000430083	0.00733871
ENSMUSG00000021476	HABP4	200.99	0.631732	0.21041	3.00238	0.00267878	0.0296786
ENSMUSG00000027806	TSC22D2	970.812	0.631539	0.194515	3.24673	0.00116737	0.0155813
ENSMUSG00000038545	CUL7	3741.19	0.631351	0.178765	3.53174	0.000412832	0.00710782
ENSMUSG00000021226	ACOT2	542.777	0.631008	0.135213	4.66678	3.0595e-06	0.000137398
ENSMUSG00000049823	ZBTB12	431.508	0.63074	0.213703	2.95148	0.00316258	0.0336403
ENSMUSG00000029461	FAM168A	2635.21	0.63001	0.173632	3.62842	0.000285164	0.00540775
ENSMUSG00000030096	SLC6A6	4903.82	0.627036	0.128873	4.86554	1.14144e-06	6.15449e-05
ENSMUSG00000039810	ZC3H10	1423.41	0.626445	0.158577	3.95041	7.80174e-05	0.00199391
ENSMUSG00000030323	IFT122	529.872	0.626369	0.154557	4.05268	5.06346e-05	0.00142074
ENSMUSG00000054150	SYNE3	1968.12	0.626308	0.171605	3.64971	0.000262534	0.00506231
ENSMUSG00000037321	TAP1	8742.45	0.62427	0.181119	3.44675	0.000567381	0.00903606
ENSMUSG00000007603	DUS3L	1567.3	0.622965	0.129249	4.81987	1.43654e-06	7.41995e-05
ENSMUSG00000078580	E430018J23RIK	399.296	0.621566	0.166498	3.73318	0.00018908	0.00391226
ENSMUSG00000039512	UHRF1BP1	828.421	0.620511	0.194594	3.18874	0.00142893	0.0183142
ENSMUSG00000036882	ARHGAP33	437.236	0.620269	0.173619	3.5726	0.000353456	0.00634598
ENSMUSG00000026510	TRP53BP2	1354.42	0.61884	0.132688	4.66389	3.10285e-06	0.000138982
ENSMUSG00000026239	PDE6D	716.548	0.618498	0.165184	3.7443	0.000180894	0.00377457
ENSMUSG00000079003	SAMD1	1730.03	0.616729	0.21636	2.85047	0.00436544	0.0430043
ENSMUSG00000022048	DPYSL2	1594.97	0.616339	0.217518	2.83351	0.00460397	0.044568
ENSMUSG00000094525	TRBV12-2	206.251	0.615862	0.214947	2.86518	0.00416771	0.0414497
ENSMUSG00000031938	4931406C07RIK	501.761	0.611804	0.16439	3.72167	0.000197908	0.00404278
ENSMUSG00000040811	EML2	807.627	0.609403	0.215062	2.83361	0.00460248	0.044568
ENSMUSG00000001666	DDT	1179.85	0.607466	0.181576	3.34552	0.000821289	0.012053
ENSMUSG00000005949	CTNS	568.658	0.606173	0.177805	3.4092	0.000651532	0.0100867
ENSMUSG00000021044	ADCK1	1095.46	0.604631	0.183279	3.29897	0.000970415	0.0136925
ENSMUSG00000043881	KBTBD7	600.205	0.603286	0.199167	3.02905	0.00245328	0.0277791
ENSMUSG00000026209	DNPEP	2165.29	0.601829	0.169499	3.55064	0.000384301	0.00674488
ENSMUSG00000034793	G6PC3	965.52	0.600418	0.174502	3.44075	0.000580105	0.00922163
ENSMUSG00000039220	PPP1R10	4755.05	0.598351	0.120802	4.95315	7.30207e-07	4.20052e-05
ENSMUSG00000018809	SMYD4	403.627	0.596846	0.183234	3.25729	0.00112482	0.0152266
ENSMUSG00000034403	PJA1	1583.17	0.59677	0.18738	3.18481	0.00144848	0.0185096
ENSMUSG00000015711	PRUNE1	1167.76	0.595895	0.157497	3.78353	0.000154621	0.00336643
ENSMUSG00000041779	TRAM2	1148.19	0.593191	0.184036	3.22324	0.0012675	0.0166205
ENSMUSG00000045140	PIGW	268.832	0.592899	0.209828	2.82565	0.00471848	0.045365
ENSMUSG00000101249	GM29216	49519.1	0.590711	0.16216	3.64276	0.000269732	0.00517789
ENSMUSG00000059842	ZFP341	421.018	0.589232	0.210772	2.79558	0.00518061	0.0486174
ENSMUSG00000055991	ZKSCAN5	735.429	0.588177	0.140985	4.1719	3.02071e-05	0.000912385
ENSMUSG00000092564	BC051226	261.508	0.583678	0.184243	3.16798	0.00153505	0.0194138
ENSMUSG00000023044	CSAD	659.059	0.582185	0.157613	3.69375	0.000220968	0.00441423
ENSMUSG00000049106	DCAF5	3355.58	0.580084	0.154229	3.76119	0.00016911	0.00359797
ENSMUSG00000041720	PI4KA	6285.62	0.57897	0.10077	5.74545	9.16795e-09	9.9803e-07
ENSMUSG00000015619	GATA3	6978.11	0.575831	0.155739	3.6974	0.000217821	0.00435642
ENSMUSG00000031860	PBX4	499.035	0.573214	0.167027	3.43186	0.000599462	0.00945941
ENSMUSG00000018931	NATD1	1435.45	0.572716	0.1993	2.87363	0.00405786	0.0405786
ENSMUSG00000041975	METTL8	1660.5	0.572286	0.120499	4.74931	2.04115e-06	9.83413e-05
ENSMUSG00000069920	B3GNT9	210.476	0.571128	0.200527	2.84813	0.0043977	0.0432478
ENSMUSG00000003199	MPND	2209.28	0.570846	0.173741	3.28562	0.00101758	0.0141949
ENSMUSG00000031969	ACAD8	547.133	0.570028	0.125974	4.52498	6.04014e-06	0.000237735
ENSMUSG00000020696	RFFL	517.818	0.569098	0.171166	3.32483	0.000884722	0.0127022
ENSMUSG00000054027	NT5DC3	1007.98	0.568639	0.142461	3.99154	6.56457e-05	0.00174514
ENSMUSG00000022179	4931414P19RIK	443.704	0.566093	0.192978	2.93345	0.00335216	0.0350926
ENSMUSG00000032370	LACTB	557.455	0.563744	0.186137	3.02866	0.00245643	0.0277964
ENSMUSG00000045078	RNF216	1248.39	0.563181	0.172604	3.26284	0.001103	0.0150622
ENSMUSG00000016528	MAPKAPK2	6041.56	0.561964	0.197287	2.84846	0.00439314	0.0432277
ENSMUSG00000031605	KLHL2	525.207	0.560395	0.134491	4.16678	3.08935e-05	0.000927343
ENSMUSG00000071661	ZBTB3	120.122	0.559601	0.189554	2.95221	0.00315511	0.0336232
ENSMUSG00000042628	ZFYVE1	1791.74	0.559501	0.154781	3.6148	0.000300581	0.00561346
ENSMUSG00000018474	CHD3	22687.2	0.559388	0.187796	2.97871	0.00289468	0.0313728
ENSMUSG00000045251	ZFP688	421.398	0.558521	0.199083	2.80547	0.00502429	0.0474823
ENSMUSG00000020747	TMEM94	2557.4	0.555578	0.158587	3.5033	0.000459535	0.00774142
ENSMUSG00000052419	2610001J05RIK	809.849	0.554422	0.132301	4.1906	2.78212e-05	0.000859111
ENSMUSG00000062944	9130023H24RIK	327.843	0.553499	0.180158	3.0723	0.00212419	0.0251058
ENSMUSG00000032120	C2CD2L	813.244	0.552991	0.172006	3.21496	0.00130463	0.0170126
ENSMUSG00000020458	RTN4	3652.09	0.549639	0.131804	4.17012	3.04435e-05	0.000917036
ENSMUSG00000041607	MBP	8709.39	0.549293	0.143154	3.83707	0.000124511	0.00286692
ENSMUSG00000076431	SOX4	19351.9	0.548058	0.111425	4.91864	8.71477e-07	4.8985e-05
ENSMUSG00000034430	ZXDC	1481.97	0.545845	0.152989	3.56788	0.000359886	0.00643455
ENSMUSG00000029726	MEPCE	4312.1	0.544807	0.148219	3.67568	0.000237217	0.00469521
ENSMUSG00000033430	TERF2IP	1244.06	0.542839	0.131102	4.14058	3.46433e-05	0.00102559
ENSMUSG00000045980	TMEM104	548.55	0.54279	0.183944	2.95084	0.00316911	0.0336572
ENSMUSG00000057667	BLOC1S3	534.881	0.54198	0.178099	3.04314	0.00234121	0.0269202
ENSMUSG00000034445	CYB561A3	558.962	0.541396	0.164602	3.28912	0.001005	0.0140998
ENSMUSG00000034341	WBP2	4132.76	0.540954	0.178439	3.03159	0.00243268	0.0276094
ENSMUSG00000049090	ZADH2	1406.6	0.540652	0.133764	4.04185	5.30316e-05	0.00146883
ENSMUSG00000085436	ZFP335OS	190.211	0.539116	0.193256	2.78964	0.00527664	0.0492181
ENSMUSG00000047454	GPHN	996.548	0.538326	0.174817	3.07937	0.00207438	0.0246065
ENSMUSG00000034175	RHBDD3	323.347	0.537121	0.169793	3.16339	0.00155944	0.0196357
ENSMUSG00000027086	FASTKD1	613.508	0.535253	0.185396	2.88708	0.0038884	0.0392031
ENSMUSG00000062116	ZFP954	831.203	0.535099	0.167581	3.19308	0.00140765	0.0181089
ENSMUSG00000018570	2810408A11RIK	287.572	0.53461	0.173068	3.08901	0.00200823	0.023997
ENSMUSG00000047003	ZFP41	666.341	0.528488	0.16908	3.12567	0.00177402	0.0218576
ENSMUSG00000046792	ZFP787	878.992	0.525164	0.177323	2.96162	0.00306025	0.0328361
ENSMUSG00000039530	TUSC3	1390.06	0.524206	0.180752	2.90014	0.00373001	0.038211
ENSMUSG00000040282	BC052040	440.725	0.522941	0.137923	3.79154	0.000149716	0.00329105
ENSMUSG00000030766	ARHGAP17	1371.95	0.52284	0.151219	3.45749	0.000545223	0.00878075
ENSMUSG00000036968	CNPY4	772.994	0.521817	0.13423	3.8875	0.000101282	0.00241281
ENSMUSG00000060012	KIF13B	1317.34	0.518516	0.151483	3.42293	0.000619492	0.00966902
ENSMUSG00000019518	AP4M1	1093.33	0.516807	0.0989042	5.22533	1.73844e-07	1.21549e-05
ENSMUSG00000044617	ZBTB39	818.629	0.516673	0.150891	3.42415	0.000616725	0.00963459
ENSMUSG00000038888	CTU1	733.476	0.513663	0.156245	3.28755	0.00101064	0.014144
ENSMUSG00000099843	GM7160	153.961	0.511699	0.180605	2.83326	0.00460764	0.0445734
ENSMUSG00000034371	TKFC	868.944	0.510232	0.180284	2.83016	0.0046525	0.0449315
ENSMUSG00000024654	ASRGL1	1460.6	0.508818	0.108473	4.69074	2.72223e-06	0.000124197
ENSMUSG00000018449	RPAIN	561.124	0.508631	0.160535	3.16835	0.00153309	0.0194049
ENSMUSG00000097048	1600020E01RIK	385.23	0.508583	0.154893	3.28344	0.0010255	0.0142939
ENSMUSG00000032840	2410131K14RIK	602.17	0.507481	0.17798	2.85133	0.00435365	0.0429374
ENSMUSG00000034951	COG7	749.693	0.502625	0.143505	3.50248	0.000460941	0.00775414
ENSMUSG00000019986	AHI1	1119.12	0.501241	0.128382	3.90431	9.44959e-05	0.00229891
ENSMUSG00000040560	WDR7	1442.09	0.50113	0.15629	3.20642	0.00134399	0.0174202
ENSMUSG00000005198	POLR2A	20458.9	0.499924	0.128006	3.90546	9.40449e-05	0.00229118
ENSMUSG00000058486	WDR91	1506.9	0.496922	0.13123	3.78666	0.000152686	0.00333275
ENSMUSG00000040365	TRIM41	1251.11	0.494701	0.127271	3.88699	0.000101495	0.00241454
ENSMUSG00000020387	JADE2	4957.13	0.494405	0.158111	3.12694	0.00176634	0.0217785
ENSMUSG00000043162	PYURF	374.054	0.494296	0.161794	3.05509	0.00224989	0.0261384
ENSMUSG00000001829	CLPB	1256.27	0.493606	0.126309	3.90793	9.30913e-05	0.00227763
ENSMUSG00000048930	TADA3	1607.92	0.491541	0.166882	2.94543	0.00322505	0.0340312
ENSMUSG00000033885	PXK	1521.33	0.490202	0.105382	4.65164	3.29299e-06	0.000145978
ENSMUSG00000013622	ATRAID	863.844	0.49002	0.160279	3.05729	0.00223347	0.0260093
ENSMUSG00000020777	ACOX1	2027.64	0.488935	0.153313	3.18913	0.00142701	0.0183032
ENSMUSG00000028032	PAPSS1	1779.13	0.486058	0.111169	4.37225	1.22975e-05	0.000439803
ENSMUSG00000039952	DAG1	2173.38	0.482816	0.148037	3.26145	0.00110843	0.015107
ENSMUSG00000018707	DYNC1H1	20948.2	0.481303	0.163562	2.94262	0.00325443	0.0342362
ENSMUSG00000031066	USP11	6494.78	0.481059	0.144778	3.32273	0.000891406	0.0127768
ENSMUSG00000028567	TXNDC12	1618.81	0.480391	0.101183	4.74774	2.057e-06	9.88282e-05
ENSMUSG00000031310	ZMYM3	3440.68	0.479776	0.142687	3.36243	0.0007726	0.0114657
ENSMUSG00000028405	ACO1	2108.55	0.478905	0.150138	3.18975	0.00142395	0.0182775
ENSMUSG00000023143	NAGPA	1010.58	0.477132	0.158364	3.01287	0.00258786	0.0288659
ENSMUSG00000022475	HDAC7	15760.4	0.477035	0.161299	2.95747	0.00310179	0.0331854
ENSMUSG00000026585	KIFAP3	711.565	0.476442	0.150266	3.17065	0.00152097	0.0192926
ENSMUSG00000048997	ATXN7L2	924.755	0.475076	0.140438	3.38281	0.000717482	0.0108066
ENSMUSG00000053838	NUDCD3	4376.14	0.473526	0.0891525	5.31142	1.08775e-07	8.18615e-06
ENSMUSG00000021179	NRDE2	1492.76	0.467159	0.143269	3.2607	0.00111136	0.0151349
ENSMUSG00000049657	ZBTB5	1274.45	0.465673	0.103926	4.4808	7.43653e-06	0.000285697
ENSMUSG00000091811	INAFM1	283.774	0.464786	0.166283	2.79514	0.00518766	0.048652
ENSMUSG00000030823	9130019O22RIK	501.959	0.464372	0.153282	3.02953	0.00244935	0.0277528
ENSMUSG00000067825	PEX26	740.456	0.464089	0.12456	3.72583	0.000194674	0.0039957
ENSMUSG00000045216	HS6ST1	2266.28	0.462164	0.149255	3.09647	0.00195837	0.0235552
ENSMUSG00000019087	ATP6AP1	4208.38	0.456241	0.151347	3.01454	0.00257367	0.028741
ENSMUSG00000002731	PRKRA	609.646	0.45366	0.150603	3.0123	0.00259275	0.0288829
ENSMUSG00000038982	BLOC1S5	543.084	0.452036	0.155907	2.89939	0.00373889	0.0382541
ENSMUSG00000003316	GLG1	5886.94	0.451679	0.127979	3.52931	0.000416645	0.00716629
ENSMUSG00000038949	CNST	1345.33	0.450503	0.12418	3.62781	0.000285835	0.00541449
ENSMUSG00000031400	G6PDX	2839.98	0.449108	0.138183	3.2501	0.00115363	0.0154657
ENSMUSG00000024666	TMEM138	455.773	0.449096	0.148929	3.01551	0.00256547	0.0287279
ENSMUSG00000050043	TMX2	2239.64	0.448483	0.100093	4.48066	7.44141e-06	0.000285697
ENSMUSG00000025464	PAOX	578.329	0.446273	0.144246	3.09383	0.00197591	0.0237496
ENSMUSG00000049940	PGRMC2	1710.33	0.445107	0.103509	4.30016	1.70672e-05	0.000583152
ENSMUSG00000048351	COA7	621.629	0.443535	0.121842	3.64026	0.000272365	0.00522262
ENSMUSG00000036026	TMEM63B	616.766	0.442024	0.133601	3.30855	0.000937791	0.0133086
ENSMUSG00000022744	CLDND1	1351.25	0.44025	0.10675	4.1241	3.72179e-05	0.00108684
ENSMUSG00000090150	ACAD11	1082.88	0.439724	0.13612	3.23042	0.00123609	0.0163042
ENSMUSG00000034617	MTRR	828.44	0.439108	0.114113	3.848	0.000119087	0.00277167
ENSMUSG00000037242	CLIC4	4369	0.438471	0.128151	3.42151	0.00062274	0.0097109
ENSMUSG00000041658	RRAGB	428.818	0.437392	0.148422	2.94694	0.00320932	0.0339277
ENSMUSG00000005823	GPR108	1350.27	0.437391	0.156849	2.78861	0.0052934	0.0493477
ENSMUSG00000038080	KDM1B	1421.91	0.437184	0.134395	3.25297	0.00114204	0.0153822
ENSMUSG00000024400	WDR33	4519.89	0.436798	0.0885807	4.93108	8.17759e-07	4.6268e-05
ENSMUSG00000006494	PDK1	3894.21	0.436099	0.139267	3.13139	0.00173981	0.0215131
ENSMUSG00000050240	HIC2	605.391	0.433259	0.110276	3.92888	8.53437e-05	0.00212126
ENSMUSG00000051306	USP42	1839.17	0.429449	0.116356	3.69082	0.00022353	0.00446023
ENSMUSG00000025008	TCTN3	225.146	0.424801	0.132516	3.20566	0.00134753	0.0174398
ENSMUSG00000039914	COQ10A	490.076	0.419376	0.147913	2.83528	0.00457857	0.044417
ENSMUSG00000059851	KMT5C	1298.74	0.417512	0.143844	2.90254	0.00370154	0.0379871
ENSMUSG00000030269	MTMR14	1236.03	0.41745	0.123078	3.39175	0.00069448	0.0105532
ENSMUSG00000027775	MFSD1	1354.88	0.417094	0.138587	3.00961	0.00261583	0.0291024
ENSMUSG00000042650	ALKBH5	4758.02	0.414442	0.106348	3.89703	9.73788e-05	0.00234275
ENSMUSG00000004394	TMED4	1605.25	0.41327	0.112554	3.67176	0.000240886	0.00473513
ENSMUSG00000040697	DNAJC16	843.018	0.413266	0.136283	3.03241	0.0024261	0.0275802
ENSMUSG00000029640	USP12	1498.85	0.412532	0.14496	2.84584	0.0044295	0.0434364
ENSMUSG00000050846	ZFP623	491.458	0.409739	0.128534	3.18779	0.00143366	0.0183611
ENSMUSG00000047248	C2CD3	4350.22	0.404618	0.1321	3.06296	0.00219156	0.0255906
ENSMUSG00000034064	POGLUT1	1322.05	0.403506	0.0944029	4.27429	1.91746e-05	0.000640393
ENSMUSG00000042364	SNX18	1124.45	0.400697	0.119934	3.34098	0.000834845	0.0122311
ENSMUSG00000015869	PRPSAP1	2191.94	0.400016	0.130207	3.07215	0.00212523	0.0251058
ENSMUSG00000050627	GPD1L	2823.17	0.399669	0.0939411	4.25446	2.09552e-05	0.000687842
ENSMUSG00000039901	9130011E15RIK	737.875	0.385423	0.132385	2.91137	0.00359848	0.0372181
ENSMUSG00000005299	LETM1	3611.75	0.383293	0.103465	3.70457	0.000211753	0.00425982
ENSMUSG00000040669	PHC1	1925.12	0.382812	0.117287	3.2639	0.00109889	0.0150249
ENSMUSG00000024127	PREPL	1057.4	0.382241	0.100887	3.7888	0.000151379	0.0033141
ENSMUSG00000026790	ODF2	2868.31	0.381251	0.122613	3.10939	0.00187475	0.0227884
ENSMUSG00000008429	HERPUD2	1246.6	0.374245	0.130655	2.86437	0.00417834	0.0414939
ENSMUSG00000026027	STRADB	952.537	0.373899	0.106773	3.50182	0.000462085	0.00776158
ENSMUSG00000020744	SLC25A19	1056.6	0.369847	0.121841	3.03549	0.00240147	0.027409
ENSMUSG00000070939	TGFBRAP1	1520.22	0.367765	0.107273	3.42832	0.000607337	0.00953121
ENSMUSG00000014426	MAP3K4	1551.01	0.366489	0.120894	3.03149	0.00243348	0.0276094
ENSMUSG00000031681	SMAD1	1163.78	0.363742	0.102531	3.54763	0.000388716	0.00678132
ENSMUSG00000030801	KAT8	1247.56	0.359871	0.109924	3.2738	0.0010611	0.0146359
ENSMUSG00000020986	SEC23A	1496.4	0.359008	0.110919	3.23665	0.0012094	0.016026
ENSMUSG00000025231	SUFU	2319.37	0.352212	0.113967	3.09047	0.00199843	0.0239533
ENSMUSG00000002814	TOP3A	1373.31	0.351566	0.113322	3.10237	0.00191977	0.0231883
ENSMUSG00000096740	LBHD1	736.66	0.348896	0.117754	2.96292	0.00304732	0.0327178
ENSMUSG00000041870	ANKRD13A	13358.1	0.345818	0.105491	3.27818	0.00104478	0.0144831
ENSMUSG00000039108	LSM14B	1745.11	0.34405	0.10341	3.32705	0.000877692	0.0126326
ENSMUSG00000031161	HDAC6	1490.35	0.342178	0.117838	2.9038	0.00368666	0.0379023
ENSMUSG00000037426	DEPDC5	1894.16	0.339854	0.0958014	3.54748	0.00038893	0.00678132
ENSMUSG00000050382	KIF7	605.306	0.332355	0.115143	2.88645	0.00389617	0.0392355
ENSMUSG00000026563	TADA1	1680.23	0.325148	0.097523	3.33406	0.000855867	0.0124122
ENSMUSG00000063870	CHD4	38209.7	0.313475	0.108046	2.9013	0.00371617	0.0381146
ENSMUSG00000030095	TMEM43	2650.05	0.309975	0.106499	2.9106	0.00360735	0.0372875
ENSMUSG00000030536	IQGAP1	26513.3	0.308813	0.110936	2.7837	0.00537422	0.0498409
ENSMUSG00000042506	USP22	6245.25	0.308749	0.0771981	3.99943	6.34939e-05	0.00169844
ENSMUSG00000048429	TIMM29	2958.84	0.296654	0.0999118	2.96916	0.00298617	0.0321818
ENSMUSG00000004462	TBCCD1	589.809	0.290833	0.102699	2.83189	0.00462736	0.0447138
ENSMUSG00000028920	FBXO42	2355.07	0.28268	0.100229	2.82034	0.0047973	0.045943
ENSMUSG00000028089	CHD1L	1911.56	0.280384	0.0805439	3.48113	0.000499307	0.00820256
ENSMUSG00000032512	WDR48	3076.85	0.258047	0.064817	3.98115	6.85817e-05	0.00180092
ENSMUSG00000033628	PIK3C3	2148.92	0.236389	0.0794761	2.97434	0.00293623	0.031743
ENSMUSG00000032458	COPB2	6860.96	-0.213905	0.0639998	-3.34227	0.000830947	0.0121844
ENSMUSG00000031985	GNPAT	3642.41	-0.229347	0.081166	-2.82565	0.00471849	0.045365
ENSMUSG00000043962	THRAP3	14847	-0.231865	0.0801463	-2.89302	0.00381556	0.0387183
ENSMUSG00000031660	BRD7	3957.67	-0.24316	0.0829359	-2.9319	0.00336892	0.0352252
ENSMUSG00000024271	ELP2	3993.38	-0.252965	0.0869848	-2.90815	0.00363578	0.0375273
ENSMUSG00000021576	PDCD6	2048.08	-0.254125	0.0863766	-2.94206	0.00326034	0.0342775
ENSMUSG00000032199	POLR2M	5406.88	-0.258766	0.0856783	-3.02021	0.00252601	0.0284155
ENSMUSG00000044147	ARF6	6553.92	-0.259287	0.0920028	-2.81825	0.00482865	0.0460442
ENSMUSG00000025421	HDHD2	916.69	-0.260801	0.0831533	-3.13639	0.00171041	0.0212565
ENSMUSG00000060373	HNRNPC	14789	-0.263575	0.0884591	-2.97962	0.00288603	0.0312987
ENSMUSG00000037669	LDAH	1309.69	-0.268203	0.0815481	-3.28889	0.00100584	0.0140998
ENSMUSG00000029454	MAPKAPK5	1270.57	-0.280328	0.0783326	-3.57869	0.000345326	0.00621949
ENSMUSG00000055319	SEC23IP	2743.99	-0.281994	0.0918893	-3.06884	0.00214889	0.0252707
ENSMUSG00000001847	RAC1	9070.16	-0.285121	0.0947854	-3.00807	0.00262912	0.0292313
ENSMUSG00000020088	SAR1A	4154.63	-0.286578	0.0804452	-3.56239	0.000367489	0.00650959
ENSMUSG00000026869	PSMD5	2123.2	-0.292497	0.0946909	-3.08897	0.0020085	0.023997
ENSMUSG00000092558	MED20	1457.37	-0.294061	0.0907266	-3.24118	0.00119038	0.0158226
ENSMUSG00000038398	UPF3A	1100.88	-0.294277	0.0961663	-3.06009	0.00221272	0.0258026
ENSMUSG00000033106	SLC7A6OS	955.425	-0.29564	0.0972403	-3.0403	0.0023634	0.0271146
ENSMUSG00000024668	SDHAF2	1689.82	-0.300641	0.105853	-2.84016	0.00450902	0.0440654
ENSMUSG00000005936	KCTD20	4040.8	-0.300922	0.0879725	-3.42064	0.000624736	0.0097332
ENSMUSG00000026926	PMPCA	3528.75	-0.306249	0.108873	-2.8129	0.00490974	0.0466819
ENSMUSG00000044066	CEP68	2080.68	-0.306691	0.108825	-2.81821	0.00482929	0.0460442
ENSMUSG00000015120	UBE2I	8362.93	-0.311174	0.0595065	-5.22925	1.70203e-07	1.19979e-05
ENSMUSG00000020171	YEATS4	2290.48	-0.313893	0.0959545	-3.27127	0.00107064	0.0147299
ENSMUSG00000035530	EIF1	12751.1	-0.315104	0.1076	-2.92849	0.00340618	0.0355283
ENSMUSG00000002845	TMEM39A	907.822	-0.315418	0.110524	-2.85384	0.00431943	0.0426882
ENSMUSG00000032058	PPP2R1B	1875.65	-0.317936	0.110968	-2.86512	0.00416854	0.0414497
ENSMUSG00000019897	CCDC59	1144.09	-0.31901	0.101691	-3.13706	0.00170651	0.0212234
ENSMUSG00000021288	KLC1	1781.94	-0.319426	0.110584	-2.88855	0.00387024	0.0390887
ENSMUSG00000040028	ELAVL1	4592.95	-0.321087	0.0923852	-3.47552	0.000509861	0.00833614
ENSMUSG00000028343	ERP44	2178.77	-0.322068	0.108685	-2.96331	0.00304346	0.0326967
ENSMUSG00000007458	M6PR	8259.78	-0.322954	0.0914005	-3.53339	0.000410263	0.00707066
ENSMUSG00000030056	ISY1	2283.06	-0.32597	0.0885794	-3.67997	0.000233257	0.00462747
ENSMUSG00000026843	FUBP3	1558.33	-0.326098	0.0961257	-3.39241	0.000692808	0.0105454
ENSMUSG00000027332	IVD	2183.11	-0.332973	0.117154	-2.84218	0.00448057	0.0439121
ENSMUSG00000020250	TXNRD1	4113.88	-0.333996	0.115431	-2.89346	0.00381024	0.0386872
ENSMUSG00000021460	AUH	1106.86	-0.334475	0.10245	-3.26478	0.00109549	0.0150139
ENSMUSG00000028790	KHDRBS1	10359.7	-0.334966	0.115592	-2.89784	0.00375748	0.038378
ENSMUSG00000040128	PNRC1	3847.17	-0.344033	0.120555	-2.85373	0.00432094	0.0426882
ENSMUSG00000021686	AP3B1	4166.42	-0.344959	0.103566	-3.33081	0.000865951	0.0124953
ENSMUSG00000094936	RBM4	1290.06	-0.349538	0.120394	-2.90328	0.00369274	0.0379287
ENSMUSG00000020873	SLC35B1	1221.44	-0.349903	0.115717	-3.02378	0.00249636	0.0281741
ENSMUSG00000017858	IFT52	1844.41	-0.358687	0.100508	-3.56875	0.000358687	0.00642647
ENSMUSG00000019923	ZWINT	2506.89	-0.359138	0.0868548	-4.13492	3.55076e-05	0.00104503
ENSMUSG00000020946	GOSR2	4598.15	-0.360383	0.0998176	-3.61041	0.000305712	0.00570309
ENSMUSG00000023994	NFYA	3122.66	-0.363933	0.123301	-2.95158	0.00316155	0.0336403
ENSMUSG00000036819	JMJD4	919.4	-0.364485	0.111791	-3.26041	0.00111253	0.0151389
ENSMUSG00000024273	2700062C07RIK	499.476	-0.368398	0.0993332	-3.70871	0.000208316	0.00421233
ENSMUSG00000021996	ESD	2914.92	-0.36912	0.131494	-2.80712	0.00499864	0.0472659
ENSMUSG00000014245	PIGL	333.885	-0.369963	0.121574	-3.04311	0.00234143	0.0269202
ENSMUSG00000027942	4933434E20RIK	1922.41	-0.379732	0.101275	-3.74951	0.00017718	0.00371194
ENSMUSG00000025878	UIMC1	1967.02	-0.383435	0.12409	-3.08997	0.00200178	0.0239767
ENSMUSG00000024587	NARS	4494.57	-0.386716	0.136894	-2.82493	0.00472916	0.0454422
ENSMUSG00000028107	TARS2	1872.17	-0.387304	0.119301	-3.24644	0.00116859	0.0155813
ENSMUSG00000028062	LAMTOR2	1047.68	-0.387305	0.12829	-3.01899	0.00253617	0.0284739
ENSMUSG00000032116	STT3A	5171.45	-0.387723	0.126509	-3.06479	0.00217826	0.0255434
ENSMUSG00000022285	YWHAZ	20431.9	-0.391473	0.132635	-2.95151	0.00316228	0.0336403
ENSMUSG00000025532	CRCP	832.596	-0.391651	0.0995887	-3.93269	8.40017e-05	0.00209396
ENSMUSG00000017801	MLX	1821.72	-0.396814	0.137324	-2.88962	0.00385705	0.0390472
ENSMUSG00000018322	TOMM34	2054.14	-0.396835	0.118948	-3.33622	0.000849264	0.0123373
ENSMUSG00000029432	GBAS	1231.65	-0.397208	0.121529	-3.26843	0.00108147	0.0148454
ENSMUSG00000016541	ATXN10	5327.1	-0.398987	0.13725	-2.907	0.00364912	0.0376063
ENSMUSG00000006705	PKNOX1	2161.37	-0.399933	0.121622	-3.28834	0.0010078	0.0141158
ENSMUSG00000031622	SIN3B	5067.12	-0.401355	0.14218	-2.82287	0.0047596	0.0456582
ENSMUSG00000028869	GNL2	2682.13	-0.40424	0.137412	-2.9418	0.0032631	0.0342855
ENSMUSG00000074238	AP1AR	1759.06	-0.405137	0.137638	-2.94349	0.00324539	0.034162
ENSMUSG00000028525	PDE4B	2079.53	-0.40554	0.132031	-3.07154	0.00212955	0.025124
ENSMUSG00000041215	YEATS2	2678.75	-0.408677	0.134707	-3.03381	0.00241487	0.0275254
ENSMUSG00000034544	RSRC1	997.311	-0.410219	0.134449	-3.0511	0.00228006	0.026391
ENSMUSG00000022283	PABPC1	63170.9	-0.411047	0.134161	-3.06384	0.00218517	0.0255506
ENSMUSG00000071456	1110002L01RIK	607.731	-0.412289	0.125957	-3.27325	0.00106319	0.0146529
ENSMUSG00000087260	LAMTOR5	1225.95	-0.41259	0.13818	-2.98588	0.00282762	0.0309217
ENSMUSG00000045302	PREB	3616.35	-0.413377	0.0973536	-4.24614	2.17486e-05	0.000708478
ENSMUSG00000001158	SNRNP27	1540.53	-0.413893	0.1438	-2.87826	0.0039988	0.0401045
ENSMUSG00000023923	TBC1D5	1655.01	-0.414302	0.148746	-2.78529	0.00534793	0.0497525
ENSMUSG00000026727	RSU1	1853.63	-0.41458	0.137618	-3.01253	0.00259078	0.0288797
ENSMUSG00000025246	TBL1X	5294.74	-0.415831	0.131109	-3.17165	0.00151578	0.0192409
ENSMUSG00000027187	CAT	4451.94	-0.416182	0.119392	-3.48586	0.00049056	0.00812092
ENSMUSG00000024824	RAD9A	1163.21	-0.41888	0.146917	-2.85113	0.00435636	0.0429395
ENSMUSG00000049489	FAM58B	765.376	-0.419191	0.13055	-3.21097	0.0013229	0.0171987
ENSMUSG00000093661	EIF4E3	1756.97	-0.420593	0.146667	-2.86767	0.00413512	0.0412074
ENSMUSG00000022195	6030458C11RIK	1679	-0.421993	0.146962	-2.87145	0.00408596	0.0408121
ENSMUSG00000053094	TMEM248	2403.27	-0.422391	0.112219	-3.76398	0.000167231	0.00357313
ENSMUSG00000048497	MMGT2	883.572	-0.422416	0.106466	-3.96762	7.25947e-05	0.0018833
ENSMUSG00000029534	ST7	759.224	-0.422468	0.110411	-3.82631	0.00013008	0.0029478
ENSMUSG00000022295	ATP6V1C1	1506.71	-0.422967	0.147017	-2.87698	0.00401497	0.0402421
ENSMUSG00000022148	FYB	13871.8	-0.424823	0.139146	-3.05306	0.00226518	0.0262542
ENSMUSG00000056820	TSNAX	2903.73	-0.426301	0.0675426	-6.31159	2.7619e-10	5.05368e-08
ENSMUSG00000058979	CECR5	1169.29	-0.427533	0.144555	-2.95758	0.00310061	0.0331854
ENSMUSG00000046519	GOLPH3L	2017.47	-0.428428	0.136958	-3.12817	0.00175896	0.0217031
ENSMUSG00000032580	RBM5	4820.18	-0.428768	0.137499	-3.11833	0.00181879	0.0222815
ENSMUSG00000040174	ALKBH3	955.242	-0.429498	0.142294	-3.01839	0.00254118	0.0285116
ENSMUSG00000037851	IARS	4593.67	-0.43046	0.148882	-2.89129	0.00383662	0.0388633
ENSMUSG00000026201	STK16	2551.22	-0.430705	0.129044	-3.33765	0.000844895	0.0123057
ENSMUSG00000042369	RBM45	1568.41	-0.433597	0.0900476	-4.8152	1.47052e-06	7.548e-05
ENSMUSG00000063888	RPL7L1	3409.57	-0.442804	0.0911248	-4.85931	1.17797e-06	6.3316e-05
ENSMUSG00000020366	MAPK9	2414.81	-0.44319	0.130807	-3.38812	0.000703736	0.0106271
ENSMUSG00000014551	MRPS25	927.936	-0.444121	0.135734	-3.27199	0.00106793	0.0147065
ENSMUSG00000002524	PUF60	6583.48	-0.445535	0.145132	-3.06987	0.00214155	0.0252465
ENSMUSG00000063268	PARP10	2089.16	-0.446528	0.153569	-2.90766	0.00364138	0.037549
ENSMUSG00000034789	RAB24	781.881	-0.448222	0.123583	-3.62688	0.000286871	0.00542813
ENSMUSG00000021772	NKIRAS1	268.655	-0.448344	0.148348	-3.02225	0.00250901	0.028272
ENSMUSG00000028906	EPB41	7480.83	-0.449694	0.108095	-4.16019	3.17985e-05	0.000947894
ENSMUSG00000017679	TTPAL	2644.3	-0.450514	0.127766	-3.5261	0.000421729	0.00721583
ENSMUSG00000022476	POLR3H	836.807	-0.452336	0.151953	-2.97682	0.0029126	0.0315272
ENSMUSG00000005417	MPRIP	7707.64	-0.452343	0.11977	-3.77676	0.00015888	0.00344173
ENSMUSG00000003809	GCDH	668.649	-0.452388	0.152248	-2.97138	0.00296461	0.0319895
ENSMUSG00000015143	ACTN1	10901.3	-0.453688	0.161583	-2.80776	0.00498869	0.0472237
ENSMUSG00000015363	TRABD	2460.67	-0.455915	0.157972	-2.88605	0.00390107	0.0392388
ENSMUSG00000040701	AP1G2	1379.67	-0.456625	0.146175	-3.12383	0.00178513	0.0219629
ENSMUSG00000011257	PABPC4	4802.18	-0.456953	0.0999602	-4.57135	4.84603e-06	0.000199884
ENSMUSG00000029433	DIABLO	2385.52	-0.462799	0.127436	-3.63162	0.000281645	0.00536466
ENSMUSG00000041453	RPL21	28097.5	-0.464473	0.166013	-2.79782	0.00514495	0.0483305
ENSMUSG00000022822	ABCC5	1682.24	-0.465831	0.166298	-2.80118	0.00509154	0.0479597
ENSMUSG00000021461	FANCC	380.181	-0.467267	0.127213	-3.67312	0.000239609	0.00472082
ENSMUSG00000025137	PCYT2	1799.92	-0.468488	0.147428	-3.17773	0.00148432	0.0189113
ENSMUSG00000060181	SLC35E3	980.601	-0.469523	0.133645	-3.51321	0.000442736	0.00751733
ENSMUSG00000053929	CYHR1	2871.94	-0.471081	0.15089	-3.12203	0.00179612	0.0220508
ENSMUSG00000037085	TRMT12	315.418	-0.475493	0.124794	-3.81023	0.000138837	0.00309991
ENSMUSG00000025041	NT5C2	2981.97	-0.476474	0.104125	-4.576	4.73958e-06	0.00019691
ENSMUSG00000021417	ECI2	1983.15	-0.477075	0.118827	-4.01487	5.94795e-05	0.0016111
ENSMUSG00000085936	2610307P16RIK	700.033	-0.478044	0.137432	-3.4784	0.000504418	0.00827072
ENSMUSG00000031478	NEK3	181.114	-0.47833	0.151639	-3.15439	0.00160832	0.0201333
ENSMUSG00000020718	POLG2	249.451	-0.478586	0.167276	-2.86106	0.00422223	0.0418718
ENSMUSG00000004268	EMG1	4413.49	-0.479608	0.129441	-3.70522	0.000211207	0.00425382
ENSMUSG00000061758	AKR1B10	616.789	-0.480497	0.124525	-3.85864	0.000114019	0.0026682
ENSMUSG00000048307	ANKRD46	1865.33	-0.481067	0.0855921	-5.62045	1.90458e-08	1.8682e-06
ENSMUSG00000015112	SLC25A13	561.821	-0.481217	0.159128	-3.02408	0.00249392	0.0281651
ENSMUSG00000055707	KLHL26	511.143	-0.482921	0.138046	-3.49827	0.000468285	0.00785039
ENSMUSG00000084957	BBIP1	640.864	-0.483709	0.160622	-3.01147	0.00259984	0.0289432
ENSMUSG00000020628	TRAPPC12	2453.43	-0.484716	0.124247	-3.90124	9.57005e-05	0.00231838
ENSMUSG00000050732	VAMP8	1653.54	-0.486023	0.16382	-2.9668	0.00300914	0.0324085
ENSMUSG00000058558	RPL5	2029.29	-0.487764	0.148887	-3.27606	0.00105267	0.0145663
ENSMUSG00000059713	RCAN3	843.638	-0.488407	0.149633	-3.26402	0.00109842	0.0150249
ENSMUSG00000056228	CARS2	860.417	-0.491247	0.152421	-3.22295	0.00126876	0.0166205
ENSMUSG00000086583	GM15500	47036	-0.492274	0.147971	-3.32683	0.000878404	0.0126326
ENSMUSG00000089872	RPS6KC1	530.273	-0.492615	0.17595	-2.79975	0.0051142	0.0481205
ENSMUSG00000050357	CARMIL2	6425.24	-0.49333	0.130702	-3.77446	0.000160353	0.00346928
ENSMUSG00000055681	COPE	3340.76	-0.494041	0.167699	-2.94599	0.00321919	0.0340021
ENSMUSG00000014554	DGUOK	1235.54	-0.495813	0.142007	-3.49147	0.000480378	0.00798623
ENSMUSG00000058388	PHTF1	2097.54	-0.495953	0.140061	-3.54097	0.000398661	0.00691227
ENSMUSG00000071415	RPL23	22258.4	-0.50067	0.139785	-3.58171	0.000341352	0.00616729
ENSMUSG00000024661	FTH1	23396.4	-0.501093	0.14066	-3.56244	0.000367423	0.00650959
ENSMUSG00000079557	2002-03-01	1230.4	-0.504015	0.175739	-2.86798	0.00413102	0.0411904
ENSMUSG00000054312	MRPS21	1647.29	-0.504456	0.160594	-3.14118	0.00168266	0.0209571
ENSMUSG00000054452	AES	10898.2	-0.504916	0.16904	-2.98697	0.00281762	0.0308764
ENSMUSG00000001999	BLVRA	565.023	-0.505832	0.144884	-3.4913	0.000480684	0.00798623
ENSMUSG00000022439	PARVG	12854.9	-0.508653	0.141791	-3.58735	0.000334061	0.00606103
ENSMUSG00000022370	MRPL13	1306.92	-0.510995	0.179501	-2.84676	0.00441666	0.0433705
ENSMUSG00000024338	PSMB8	13959.4	-0.511602	0.152874	-3.34655	0.00081823	0.0120184
ENSMUSG00000038722	BUD31	2199.47	-0.51299	0.163774	-3.1323	0.00173442	0.0214618
ENSMUSG00000028710	ATPAF1	661.385	-0.514333	0.183777	-2.79868	0.00513113	0.0482534
ENSMUSG00000020359	PHYKPL	209.451	-0.514963	0.169059	-3.04606	0.00231865	0.026694
ENSMUSG00000060126	TPT1	61204	-0.516956	0.152343	-3.39336	0.000690406	0.0105417
ENSMUSG00000022241	TARS	3129.45	-0.520403	0.148836	-3.49649	0.000471425	0.00788255
ENSMUSG00000107283	MPV17	541.293	-0.523576	0.175352	-2.98585	0.0028279	0.0309217
ENSMUSG00000021548	CCNH	1584.89	-0.524683	0.171266	-3.06355	0.00218727	0.0255577
ENSMUSG00000019927	UBE2D1	938.5	-0.525107	0.12885	-4.07534	4.59464e-05	0.00131058
ENSMUSG00000054021	SIRT5	370.171	-0.527694	0.147778	-3.57086	0.000355817	0.00638171
ENSMUSG00000036561	PPP6R2	1172.36	-0.528968	0.187871	-2.81559	0.00486881	0.0463697
ENSMUSG00000039781	CEP131	479.892	-0.529546	0.126234	-4.19495	2.72933e-05	0.000845846
ENSMUSG00000010755	CARS	1309.41	-0.529546	0.170584	-3.10432	0.00190718	0.0230686
ENSMUSG00000008822	ACYP1	557.44	-0.53067	0.162006	-3.27562	0.0010543	0.0145704
ENSMUSG00000042055	WDR11	1305.62	-0.530902	0.145044	-3.66028	0.000251941	0.00490757
ENSMUSG00000029094	AFAP1	709.786	-0.532349	0.153026	-3.47883	0.000503614	0.00826541
ENSMUSG00000098332	2310009A05RIK	349.795	-0.532721	0.172531	-3.08769	0.00201721	0.0240478
ENSMUSG00000103009	GM4430	198.019	-0.533857	0.177821	-3.00221	0.00268028	0.0296786
ENSMUSG00000021193	PITRM1	4018.9	-0.534709	0.171579	-3.11639	0.00183079	0.0223489
ENSMUSG00000039740	ALG2	2040.85	-0.534746	0.161768	-3.30563	0.000947642	0.0134152
ENSMUSG00000041852	TCF20	6069.69	-0.537489	0.156581	-3.43267	0.000597679	0.00943992
ENSMUSG00000016921	SRSF6	9988.36	-0.537991	0.127194	-4.22969	2.34018e-05	0.000748163
ENSMUSG00000005886	NCOA2	5587.16	-0.540733	0.179296	-3.01586	0.00256248	0.0287162
ENSMUSG00000031422	MORF4L2	5041.68	-0.540756	0.18665	-2.89716	0.00376561	0.0384005
ENSMUSG00000041891	LMAN1	1924.74	-0.543734	0.171359	-3.17306	0.00150841	0.0191714
ENSMUSG00000062647	RPL7A	41186.9	-0.546394	0.170919	-3.1968	0.00138964	0.0178905
ENSMUSG00000084319	TPT1-PS3	20449	-0.546718	0.196483	-2.78252	0.00539381	0.049932
ENSMUSG00000030802	BCKDK	1836.8	-0.55017	0.145064	-3.7926	0.000149079	0.00328317
ENSMUSG00000071644	EEF1G	33701.5	-0.551474	0.192481	-2.86508	0.00416907	0.0414497
ENSMUSG00000098274	RPL24	14433.9	-0.551503	0.170021	-3.24374	0.00117973	0.0156932
ENSMUSG00000074129	RPL13A	68318.8	-0.554291	0.190748	-2.90589	0.0036621	0.0377174
ENSMUSG00000029815	MALSU1	576.592	-0.556101	0.131543	-4.22751	2.36291e-05	0.000752891
ENSMUSG00000069682	GM10275	44378.7	-0.557817	0.181881	-3.06694	0.00216264	0.0254081
ENSMUSG00000073702	RPL31	11167.6	-0.557925	0.190156	-2.93403	0.00334587	0.0350481
ENSMUSG00000022350	WASHC5	2789.27	-0.558129	0.137144	-4.06965	4.70844e-05	0.0013386
ENSMUSG00000028483	SNAPC3	564.985	-0.559116	0.155798	-3.58872	0.0003323	0.00604181
ENSMUSG00000050549	5730508B09RIK	485.529	-0.559938	0.155584	-3.59894	0.000319521	0.00585902
ENSMUSG00000034587	8430429K09RIK	202.137	-0.56112	0.184594	-3.03976	0.00236769	0.027121
ENSMUSG00000028245	NSMAF	2584.58	-0.562873	0.14966	-3.76101	0.00016923	0.00359797
ENSMUSG00000032231	ANXA2	11598.7	-0.563654	0.184679	-3.05207	0.00227268	0.0263233
ENSMUSG00000037318	TRAF3IP3	3830.55	-0.566839	0.141222	-4.0138	5.97478e-05	0.00161582
ENSMUSG00000016757	TTLL12	4435.1	-0.567941	0.170174	-3.33742	0.0008456	0.0123057
ENSMUSG00000022325	POP1	813.576	-0.571882	0.202907	-2.81845	0.00482565	0.0460442
ENSMUSG00000038633	DEGS1	1989.88	-0.571972	0.09511	-6.0138	1.81228e-09	2.5355e-07
ENSMUSG00000028247	COQ3	291.736	-0.576543	0.163384	-3.52876	0.000417506	0.00717393
ENSMUSG00000013539	TANGO2	432.016	-0.577151	0.155914	-3.70174	0.000214129	0.00429758
ENSMUSG00000026005	RPE	1532.56	-0.578439	0.198532	-2.91358	0.00357305	0.0369774
ENSMUSG00000008668	RPS18	34760	-0.57852	0.180491	-3.20527	0.00134938	0.0174506
ENSMUSG00000022831	HCLS1	10631.7	-0.578775	0.189477	-3.05459	0.00225367	0.0261384
ENSMUSG00000041939	MVK	480.685	-0.578916	0.19046	-3.03957	0.00236917	0.027121
ENSMUSG00000027472	PDRG1	3698.71	-0.579119	0.14906	-3.88514	0.000102272	0.00242968
ENSMUSG00000024776	STAMBPL1	1557.69	-0.579491	0.144699	-4.0048	6.20702e-05	0.00166814
ENSMUSG00000022433	CSNK1E	2423.84	-0.579642	0.166213	-3.48735	0.000487841	0.00808368
ENSMUSG00000078193	GM2000	13322.5	-0.586476	0.192244	-3.05069	0.00228319	0.0264049
ENSMUSG00000028980	H6PD	2631.35	-0.586886	0.144269	-4.068	4.74175e-05	0.00134363
ENSMUSG00000067870	RPL31-PS8	21837.8	-0.587276	0.190921	-3.07601	0.00209792	0.0248514
ENSMUSG00000022280	RNF19A	2403.94	-0.587506	0.207685	-2.82883	0.00467188	0.0450774
ENSMUSG00000062328	RPL17	46445.7	-0.589225	0.165751	-3.55488	0.000378158	0.00664384
ENSMUSG00000040548	TEX2	1948.23	-0.591707	0.1693	-3.49502	0.000474028	0.00790813
ENSMUSG00000005354	TXN2	3799.81	-0.5919	0.153788	-3.84879	0.000118702	0.00276649
ENSMUSG00000052146	RPS10	29059.3	-0.591929	0.206899	-2.86095	0.00422369	0.0418718
ENSMUSG00000061186	SFMBT2	390.138	-0.593154	0.201396	-2.94521	0.00322741	0.0340352
ENSMUSG00000022853	EHHADH	268.42	-0.596607	0.178202	-3.34792	0.000814214	0.0119901
ENSMUSG00000048758	RPL29	21363.9	-0.598769	0.173695	-3.44725	0.000566334	0.00902774
ENSMUSG00000070343	GM10288	11191.6	-0.599612	0.185779	-3.22756	0.00124852	0.0164429
ENSMUSG00000089824	RBM12	1499.46	-0.600968	0.173175	-3.47029	0.000519899	0.00846805
ENSMUSG00000053870	FPGT	375.575	-0.601829	0.19523	-3.08266	0.00205158	0.0243786
ENSMUSG00000002797	GGCT	194.293	-0.602773	0.201473	-2.99183	0.00277307	0.0304771
ENSMUSG00000107176	GM9794	10221.5	-0.60693	0.184527	-3.2891	0.00100507	0.0140998
ENSMUSG00000079435	RPL36A	6514.12	-0.608395	0.198238	-3.06901	0.00214768	0.0252707
ENSMUSG00000053317	SEC61B	4030.93	-0.609523	0.168982	-3.60702	0.000309733	0.00574075
ENSMUSG00000040952	RPS19	21133.9	-0.6109	0.198477	-3.07794	0.0020844	0.0247083
ENSMUSG00000056673	KDM5D	722.407	-0.611109	0.164477	-3.71546	0.000202831	0.00412864
ENSMUSG00000031851	NTPCR	496.542	-0.612732	0.207304	-2.95571	0.00311947	0.0333053
ENSMUSG00000034424	GCSH	1196.71	-0.614849	0.21537	-2.85485	0.00430573	0.0425868
ENSMUSG00000028559	OSBPL9	2099.03	-0.617608	0.174553	-3.53822	0.00040283	0.0069565
ENSMUSG00000026500	COX20	711.838	-0.61863	0.162033	-3.81792	0.000134579	0.00302583
ENSMUSG00000055065	DDX17	17637.3	-0.61954	0.122849	-5.0431	4.58048e-07	2.78625e-05
ENSMUSG00000030688	STARD10	1023.54	-0.622335	0.204086	-3.04937	0.00229318	0.0264894
ENSMUSG00000030220	ARHGDIB	22072.9	-0.622878	0.215253	-2.89369	0.00380739	0.0386872
ENSMUSG00000025290	RPS24	56547	-0.623119	0.14976	-4.16078	3.1716e-05	0.000947074
ENSMUSG00000032047	ACAT1	3000.62	-0.62337	0.114938	-5.42355	5.84261e-08	4.92613e-06
ENSMUSG00000018372	CEP95	701.661	-0.625202	0.143972	-4.34252	1.40859e-05	0.000492433
ENSMUSG00000037805	RPL10A	8219.38	-0.625287	0.179534	-3.48283	0.000496137	0.00816076
ENSMUSG00000031198	FUNDC2	1646.21	-0.626172	0.139212	-4.49797	6.86052e-06	0.000266368
ENSMUSG00000046330	RPL37A	20436.3	-0.627215	0.177405	-3.53551	0.000406992	0.00702132
ENSMUSG00000029171	PGM1	955.459	-0.62786	0.140444	-4.47054	7.80208e-06	0.000297857
ENSMUSG00000068391	CHRAC1	978.875	-0.627979	0.158121	-3.9715	7.14201e-05	0.00186125
ENSMUSG00000042406	ATF4	5087.44	-0.628416	0.143729	-4.37222	1.22992e-05	0.000439803
ENSMUSG00000087412	GM15501	15447.2	-0.629654	0.211073	-2.98311	0.00285333	0.0311009
ENSMUSG00000003970	RPL8	49856.4	-0.63171	0.181855	-3.4737	0.000513335	0.00838495
ENSMUSG00000033526	PPIP5K1	370.297	-0.633401	0.148544	-4.26407	2.00735e-05	0.000666534
ENSMUSG00000026447	PIK3C2B	465.565	-0.634279	0.219141	-2.89438	0.00379903	0.0386418
ENSMUSG00000055401	FBXO6	555.026	-0.637757	0.213224	-2.99102	0.00278051	0.0305395
ENSMUSG00000097290	1300002E11RIK	765.945	-0.637784	0.209834	-3.03947	0.00236993	0.027121
ENSMUSG00000024782	AK3	2157.54	-0.640335	0.135412	-4.72878	2.25869e-06	0.000106509
ENSMUSG00000020740	GGA3	2153.59	-0.640452	0.200038	-3.20165	0.00136642	0.0176312
ENSMUSG00000005103	WDR1	12093.3	-0.642183	0.162627	-3.94882	7.85372e-05	0.00200124
ENSMUSG00000076752	TCRG-C2	20304.4	-0.643579	0.148025	-4.34778	1.37526e-05	0.00048227
ENSMUSG00000037001	ZFP39	587.415	-0.649729	0.194027	-3.34865	0.000812059	0.0119687
ENSMUSG00000094724	RNASET2B	7477.06	-0.653209	0.177427	-3.68156	0.000231808	0.00460404
ENSMUSG00000008683	RPS15A	27383	-0.658477	0.175532	-3.75132	0.000175905	0.00369421
ENSMUSG00000100199	GM20324	323.166	-0.660686	0.182531	-3.61958	0.000295084	0.00554538
ENSMUSG00000030532	HDDC3	231.33	-0.668423	0.190621	-3.50656	0.000453946	0.00766229
ENSMUSG00000056069	FAM105A	1154.19	-0.671927	0.239303	-2.80785	0.0049874	0.0472237
ENSMUSG00000026648	DCLRE1C	531.47	-0.674277	0.220011	-3.06474	0.00217862	0.0255434
ENSMUSG00000027981	RNPC3	635.446	-0.67542	0.241882	-2.79235	0.00523263	0.0489744
ENSMUSG00000073436	EME2	746.569	-0.6766	0.197547	-3.425	0.000614796	0.00963069
ENSMUSG00000040618	PCK2	1193.99	-0.679035	0.226814	-2.9938	0.00275529	0.0303399
ENSMUSG00000062937	MTAP	3032.74	-0.682839	0.199414	-3.42423	0.000616537	0.00963459
ENSMUSG00000059895	PTP4A3	3947.86	-0.684473	0.188241	-3.63615	0.000276748	0.00529484
ENSMUSG00000006589	APRT	1619.39	-0.692281	0.233603	-2.9635	0.00304163	0.0326967
ENSMUSG00000034235	USP54	555.981	-0.693907	0.168484	-4.11852	3.8131e-05	0.00110786
ENSMUSG00000012076	BRMS1L	494.509	-0.694897	0.195991	-3.54555	0.0003918	0.00681391
ENSMUSG00000030319	CAND2	1573.81	-0.696685	0.18813	-3.70322	0.00021288	0.0042775
ENSMUSG00000022948	SETD4	200.88	-0.697045	0.216075	-3.22594	0.00125559	0.0165109
ENSMUSG00000024646	CYB5A	3149.29	-0.697173	0.220622	-3.16004	0.0015775	0.0198341
ENSMUSG00000014980	TSEN15	350.525	-0.698569	0.152906	-4.56863	4.90932e-06	0.00020201
ENSMUSG00000001173	OCRL	453.869	-0.700621	0.189322	-3.70068	0.000215023	0.00430547
ENSMUSG00000035776	CD99L2	707.612	-0.700925	0.217962	-3.21582	0.00130072	0.0169745
ENSMUSG00000023079	GTF2IRD1	1233.74	-0.706897	0.236228	-2.99244	0.00276758	0.0304363
ENSMUSG00000029408	ABCB9	2299.69	-0.708906	0.225122	-3.14898	0.00163843	0.0204655
ENSMUSG00000022471	XRCC6	8541.74	-0.709622	0.251244	-2.82444	0.00473636	0.0454708
ENSMUSG00000060791	GMFG	9593.89	-0.715639	0.127342	-5.61981	1.91165e-08	1.8682e-06
ENSMUSG00000038286	BPHL	617.403	-0.717207	0.167629	-4.27855	1.88115e-05	0.000631949
ENSMUSG00000016534	LAMP2	3212.02	-0.71874	0.187047	-3.84256	0.000121758	0.00282243
ENSMUSG00000042345	UBASH3A	2693.54	-0.719019	0.193825	-3.70962	0.00020757	0.00420519
ENSMUSG00000049588	CCDC69	607.574	-0.719834	0.157745	-4.56328	5.03604e-06	0.00020526
ENSMUSG00000032596	UBA7	2823.47	-0.723336	0.181873	-3.97716	6.97442e-05	0.0018231
ENSMUSG00000037563	RPS16	26112.3	-0.729247	0.193704	-3.76475	0.000166714	0.00356652
ENSMUSG00000038763	ALPK3	94.4438	-0.731609	0.230487	-3.17418	0.00150259	0.0191158
ENSMUSG00000045624	ESF1	1132.75	-0.734546	0.258036	-2.84668	0.00441774	0.0433705
ENSMUSG00000071176	ARHGEF10	223.497	-0.73759	0.254273	-2.90078	0.0037224	0.0381557
ENSMUSG00000054065	PKP3	1114.88	-0.738234	0.265257	-2.78309	0.00538445	0.049899
ENSMUSG00000015702	ANXA9	69.556	-0.741969	0.237971	-3.11789	0.00182151	0.0222989
ENSMUSG00000028495	RPS6	22320.2	-0.743982	0.200376	-3.71293	0.00020487	0.00416028
ENSMUSG00000079834	TMLHE	269.725	-0.745226	0.261776	-2.84681	0.00441596	0.0433705
ENSMUSG00000021286	ZFYVE21	240.528	-0.746796	0.213533	-3.49733	0.000469934	0.00787037
ENSMUSG00000020287	MPG	628.446	-0.746988	0.155707	-4.79739	1.60749e-06	8.13199e-05
ENSMUSG00000030793	PYCARD	2126.16	-0.751612	0.195342	-3.84767	0.000119246	0.00277167
ENSMUSG00000028367	TXN1	5745.59	-0.755087	0.216701	-3.48446	0.000493126	0.00813989
ENSMUSG00000025353	ORMDL2	881.235	-0.75629	0.124878	-6.05624	1.3934e-09	2.03106e-07
ENSMUSG00000029119	MAN2B2	2000.68	-0.764341	0.246796	-3.09706	0.00195452	0.0235254
ENSMUSG00000005267	ZFP287	181.086	-0.76789	0.223813	-3.43094	0.000601494	0.00946659
ENSMUSG00000028494	PLIN2	1744.15	-0.771018	0.165018	-4.67233	2.97803e-06	0.000134289
ENSMUSG00000026202	TUBA4A	7488.59	-0.771912	0.201942	-3.82244	0.000132136	0.00298854
ENSMUSG00000016495	PLGRKT	1463.08	-0.782566	0.169388	-4.61997	3.83802e-06	0.000167548
ENSMUSG00000078087	RPS12L1	12152.7	-0.783462	0.238997	-3.27813	0.00104497	0.0144831
ENSMUSG00000081534	SLC48A1	2757.03	-0.783842	0.206516	-3.79555	0.000147317	0.00325688
ENSMUSG00000000552	ZFP385A	1723.47	-0.787104	0.241789	-3.25533	0.00113259	0.0152669
ENSMUSG00000030104	EDEM1	10178.6	-0.79548	0.189302	-4.20219	2.64349e-05	0.000829709
ENSMUSG00000042249	GRK3	181.587	-0.797704	0.279268	-2.85641	0.00428463	0.0424026
ENSMUSG00000042675	YPEL3	1692.05	-0.799519	0.284169	-2.81354	0.00489998	0.0466149
ENSMUSG00000030161	GABARAPL1	1034.52	-0.804151	0.181927	-4.42019	9.86123e-06	0.000366335
ENSMUSG00000032018	SC5D	888.755	-0.806093	0.186858	-4.31393	1.60379e-05	0.000558404
ENSMUSG00000027907	S100A11	4188.18	-0.806508	0.261205	-3.08765	0.00201749	0.0240478
ENSMUSG00000040434	LARGE2	75.2397	-0.808053	0.290287	-2.78364	0.00537528	0.0498409
ENSMUSG00000030123	PLXND1	1582.65	-0.808475	0.271626	-2.97643	0.0029163	0.0315474
ENSMUSG00000027506	TPD52	2082.01	-0.810496	0.251463	-3.22312	0.001268	0.0166205
ENSMUSG00000021550	2210016F16RIK	666.615	-0.816052	0.21498	-3.79594	0.000147086	0.00325596
ENSMUSG00000067038	RPS12-PS3	8968.92	-0.816399	0.20167	-4.04819	5.16154e-05	0.00143887
ENSMUSG00000022637	CBLB	6207.32	-0.818391	0.234958	-3.48313	0.000495583	0.00816076
ENSMUSG00000048924	CCDC125	460.596	-0.829173	0.26348	-3.147	0.00164954	0.0205893
ENSMUSG00000109715	GM45606	245.046	-0.829919	0.221679	-3.74379	0.000181267	0.00377457
ENSMUSG00000070282	3000002C10RIK	179.19	-0.83022	0.181378	-4.57729	4.71038e-06	0.000196171
ENSMUSG00000070003	SSBP4	2935.89	-0.832469	0.195731	-4.25313	2.10806e-05	0.000690641
ENSMUSG00000035000	DPP4	12569.7	-0.83353	0.251517	-3.31401	0.000919685	0.0131057
ENSMUSG00000023960	ENPP5	499.822	-0.837649	0.23368	-3.58459	0.000337603	0.00610597
ENSMUSG00000061981	FLOT2	1645.85	-0.840082	0.23594	-3.56057	0.000370052	0.00654824
ENSMUSG00000046380	JRK	303.546	-0.840369	0.198562	-4.23228	2.31332e-05	0.000742333
ENSMUSG00000058216	GSTP3	348.024	-0.841248	0.302035	-2.78527	0.0053484	0.0497525
ENSMUSG00000000555	ITGA5	925.044	-0.841714	0.228105	-3.69003	0.000224224	0.0044689
ENSMUSG00000026603	SMYD2	1215.56	-0.846606	0.287057	-2.94926	0.00318538	0.0337217
ENSMUSG00000031604	MSMO1	1118.54	-0.848305	0.221644	-3.82734	0.000129538	0.00293937
ENSMUSG00000064373	SELENOP	2409.59	-0.848504	0.288894	-2.93707	0.00331326	0.0347277
ENSMUSG00000022434	FAM118A	271.049	-0.855053	0.177593	-4.81466	1.47449e-06	7.548e-05
ENSMUSG00000036752	TUBB4B	6005.18	-0.86085	0.228474	-3.76783	0.000164671	0.00353602
ENSMUSG00000004665	CNN2	11031.2	-0.862778	0.292374	-2.95094	0.00316808	0.0336572
ENSMUSG00000002799	JAG2	181.276	-0.864769	0.22548	-3.83524	0.000125443	0.00288066
ENSMUSG00000031816	MTHFSD	656.764	-0.869191	0.186848	-4.65185	3.28971e-06	0.000145978
ENSMUSG00000037972	SNN	2007.55	-0.87083	0.215211	-4.04641	5.20099e-05	0.00144752
ENSMUSG00000015016	ACSF3	520.397	-0.876336	0.181753	-4.82158	1.42428e-06	7.40108e-05
ENSMUSG00000023571	FAM132A	185.09	-0.876814	0.260995	-3.35951	0.000780822	0.0115767
ENSMUSG00000045410	AKR1E1	432.527	-0.877241	0.185733	-4.72312	2.32248e-06	0.000108846
ENSMUSG00000056498	TMEM154	613.441	-0.883447	0.19309	-4.57532	4.75503e-06	0.000197076
ENSMUSG00000046753	CCDC66	416.768	-0.883928	0.255851	-3.45486	0.000550581	0.00885046
ENSMUSG00000040592	CD79B	1066.58	-0.8873	0.224474	-3.9528	7.72426e-05	0.00198294
ENSMUSG00000002345	BORCS8	1107.67	-0.88905	0.156516	-5.68025	1.34499e-08	1.38526e-06
ENSMUSG00000073485	H3F3AOS	63.5277	-0.890171	0.314726	-2.8284	0.00467813	0.0450778
ENSMUSG00000038811	GNGT2	872.893	-0.89026	0.159633	-5.5769	2.44841e-08	2.35266e-06
ENSMUSG00000023094	MSRB2	476.586	-0.892496	0.168236	-5.30501	1.12669e-07	8.38924e-06
ENSMUSG00000052713	ZFP608	511.887	-0.893503	0.319118	-2.79991	0.00511162	0.0481205
ENSMUSG00000019996	MAP7	1688.82	-0.894791	0.252784	-3.53975	0.000400511	0.00693037
ENSMUSG00000044795	CYB5D1	500.447	-0.897931	0.139006	-6.45966	1.04942e-10	2.25625e-08
ENSMUSG00000091421	GM4202	2056.71	-0.900422	0.245056	-3.67436	0.00023845	0.00470999
ENSMUSG00000110148	5830408C22RIK	95.1819	-0.904942	0.283459	-3.19249	0.0014105	0.018132
ENSMUSG00000074916	CHST14	204.939	-0.908094	0.196729	-4.61595	3.91293e-06	0.000169101
ENSMUSG00000032554	TRF	495.4	-0.911132	0.289019	-3.1525	0.00161878	0.0202494
ENSMUSG00000031790	MMP15	286.027	-0.916559	0.236745	-3.87151	0.000108165	0.00255098
ENSMUSG00000097882	0610038B21RIK	51.536	-0.92064	0.278827	-3.30183	0.000960556	0.0135756
ENSMUSG00000002668	DENND1C	1134.95	-0.921913	0.325143	-2.8354	0.00457676	0.044417
ENSMUSG00000024236	SVIL	4193.69	-0.925492	0.19051	-4.85796	1.18602e-06	6.33528e-05
ENSMUSG00000040714	KLC3	612.885	-0.925638	0.281045	-3.29356	0.00098926	0.0139355
ENSMUSG00000063646	JAKMIP1	1705.07	-0.930812	0.248529	-3.74528	0.000180194	0.00376589
ENSMUSG00000044060	BTBD8	392.45	-0.938445	0.336274	-2.79071	0.00525922	0.0491623
ENSMUSG00000092074	DYNLT1A	473.515	-0.939995	0.225216	-4.17375	2.99628e-05	0.000908841
ENSMUSG00000049307	FUT4	116.317	-0.940689	0.289628	-3.24793	0.0011625	0.0155633
ENSMUSG00000037759	PTGER2	52.8399	-0.943932	0.283966	-3.3241	0.00088705	0.012725
ENSMUSG00000034035	CCDC17	51.4258	-0.947769	0.322469	-2.9391	0.00329169	0.0345275
ENSMUSG00000090862	RPS13	5710.79	-0.951712	0.282751	-3.3659	0.000762947	0.0113322
ENSMUSG00000029601	IQCD	34.8061	-0.952789	0.264384	-3.60381	0.00031359	0.00576566
ENSMUSG00000024378	STARD4	1623.75	-0.955972	0.310301	-3.08079	0.0020645	0.0245061
ENSMUSG00000037847	NMRK1	133.595	-0.956248	0.249361	-3.8348	0.000125666	0.00288176
ENSMUSG00000062931	ZFP938	98.7627	-0.956689	0.320638	-2.9837	0.00284786	0.0310979
ENSMUSG00000027165	B230118H07RIK	106.593	-0.965455	0.321688	-3.00122	0.002689	0.0297433
ENSMUSG00000045730	ADRB2	414.157	-0.987086	0.260619	-3.78747	0.000152187	0.00332608
ENSMUSG00000078485	PLEKHN1	132.376	-0.990035	0.345499	-2.86552	0.00416327	0.0414497
ENSMUSG00000020422	TNS3	2154.23	-0.994209	0.303217	-3.27887	0.00104222	0.0144683
ENSMUSG00000000253	GMPR	495.435	-0.99564	0.22273	-4.47016	7.81629e-06	0.000297857
ENSMUSG00000044712	SLC38A6	141.063	-0.997611	0.304978	-3.27109	0.00107134	0.0147299
ENSMUSG00000056598	DRC3	27.6819	-0.997658	0.351791	-2.83594	0.00456916	0.044417
ENSMUSG00000079470	UTP14B	332.504	-0.998009	0.35623	-2.80159	0.00508513	0.0479519
ENSMUSG00000018395	KIF3A	309.382	-1.00234	0.235709	-4.25246	2.11432e-05	0.000691376
ENSMUSG00000062031	PGGHG	826.287	-1.00647	0.189939	-5.29893	1.16485e-07	8.59892e-06
ENSMUSG00000020183	CPM	210.815	-1.00675	0.357212	-2.81835	0.00482712	0.0460442
ENSMUSG00000074735	GM21994	125.489	-1.00977	0.331472	-3.04633	0.00231652	0.0266873
ENSMUSG00000008999	BMP7	288.389	-1.01123	0.338597	-2.98653	0.00282161	0.0308923
ENSMUSG00000044986	TST	87.0081	-1.01324	0.323109	-3.13591	0.00171319	0.0212604
ENSMUSG00000106820	D5ERTD605E	148.459	-1.01405	0.299211	-3.38907	0.000701305	0.0106035
ENSMUSG00000001348	ACP5	2632.34	-1.02009	0.365434	-2.79145	0.00524728	0.0490773
ENSMUSG00000026463	ATP2B4	3570.38	-1.02229	0.282613	-3.61726	0.000297736	0.00557849
ENSMUSG00000045962	WNK1	7346.28	-1.02585	0.241111	-4.25469	2.0934e-05	0.000687842
ENSMUSG00000063450	SYNE2	967.945	-1.02696	0.356494	-2.88073	0.0039676	0.0398149
ENSMUSG00000056880	GADL1	233.007	-1.03297	0.350092	-2.95056	0.003172	0.0336572
ENSMUSG00000026730	PTER	84.9438	-1.03621	0.287677	-3.602	0.000315773	0.00579647
ENSMUSG00000049038	MTERF2	378.91	-1.03838	0.216571	-4.79462	1.6298e-06	8.19668e-05
ENSMUSG00000018427	YPEL2	1478.79	-1.04033	0.313433	-3.31916	0.000902888	0.0129199
ENSMUSG00000045348	NYAP1	351.363	-1.04043	0.33953	-3.06433	0.00218161	0.0255506
ENSMUSG00000024664	FADS3	223.913	-1.04766	0.338856	-3.09176	0.00198972	0.0238989
ENSMUSG00000097154	GM26510	366.322	-1.05042	0.309947	-3.38902	0.000701438	0.0106035
ENSMUSG00000056888	GLIPR1	1528.83	-1.05284	0.264009	-3.98791	6.66568e-05	0.00176656
ENSMUSG00000049807	ARHGAP23	680.101	-1.05335	0.36036	-2.92305	0.00346618	0.0359579
ENSMUSG00000070305	MPZL3	217.95	-1.05584	0.296165	-3.56505	0.000363788	0.00647069
ENSMUSG00000047507	BAIAP3	1133.44	-1.05772	0.311738	-3.39299	0.000691341	0.0105417
ENSMUSG00000095990	ZFP97	176.568	-1.06006	0.351588	-3.01506	0.00256928	0.0287327
ENSMUSG00000041460	CACNA2D4	349.157	-1.06712	0.197553	-5.4017	6.60117e-08	5.40667e-06
ENSMUSG00000021708	RASGRF2	374.716	-1.07279	0.291272	-3.68312	0.000230397	0.00458661
ENSMUSG00000078247	AIRN	113.753	-1.07399	0.288399	-3.72398	0.000196107	0.00401319
ENSMUSG00000049625	TIFAB	209.56	-1.07528	0.364418	-2.95068	0.0031708	0.0336572
ENSMUSG00000096210	H1F0	1168.17	-1.08451	0.316099	-3.43091	0.000601569	0.00946659
ENSMUSG00000048440	CYP4F16	281.071	-1.08541	0.234429	-4.63002	3.65634e-06	0.000160842
ENSMUSG00000032278	PAQR5	247.876	-1.086	0.356368	-3.04742	0.00230817	0.0266089
ENSMUSG00000021069	PYGL	117.288	-1.08607	0.373796	-2.90551	0.00366653	0.0377404
ENSMUSG00000051339	2900026A02RIK	268.743	-1.09368	0.389195	-2.81012	0.00495231	0.0470606
ENSMUSG00000029759	PON3	173.159	-1.09476	0.229409	-4.77207	1.82341e-06	9.03061e-05
ENSMUSG00000029149	KRTCAP3	79.8593	-1.10223	0.378133	-2.91492	0.00355782	0.036842
ENSMUSG00000106951	5930430L01RIK	260.657	-1.10396	0.324573	-3.40126	0.000670752	0.0103378
ENSMUSG00000032714	SYDE1	248.198	-1.10473	0.242501	-4.55556	5.22461e-06	0.000211443
ENSMUSG00000098243	GM4258	44.2035	-1.10559	0.308175	-3.58753	0.000333821	0.00606103
ENSMUSG00000020847	RPH3AL	100.294	-1.10946	0.305053	-3.63692	0.000275913	0.00528475
ENSMUSG00000027201	MYEF2	620.03	-1.11077	0.327355	-3.39315	0.000690937	0.0105417
ENSMUSG00000026601	AXDND1	80.2341	-1.11688	0.374826	-2.97972	0.00288515	0.0312987
ENSMUSG00000022895	ETS2	1907.23	-1.12141	0.254269	-4.41034	1.03208e-05	0.000381759
ENSMUSG00000070315	4930581F22RIK	167.341	-1.12337	0.29712	-3.78086	0.000156289	0.00339452
ENSMUSG00000030878	CDR2	124.933	-1.12523	0.315563	-3.56579	0.000362767	0.00645921
ENSMUSG00000079414	GM11110	42.9168	-1.12837	0.309108	-3.65043	0.000261804	0.00505391
ENSMUSG00000097799	GM26899	53.0771	-1.13866	0.337313	-3.37569	0.000736307	0.011051
ENSMUSG00000073427	GM4924	63.6794	-1.13921	0.397692	-2.86457	0.00417579	0.0414926
ENSMUSG00000034118	TPST1	207.833	-1.14019	0.354173	-3.21929	0.00128508	0.0167831
ENSMUSG00000016664	PACSIN2	617.947	-1.14375	0.310582	-3.68261	0.000230857	0.00459045
ENSMUSG00000102336	GM37233	189.666	-1.1445	0.3455	-3.31259	0.000924358	0.0131614
ENSMUSG00000070942	IL1RL2	143.649	-1.14675	0.317714	-3.60936	0.000306952	0.00571708
ENSMUSG00000110481	GM45705	157.135	-1.14682	0.339899	-3.374	0.000740831	0.0110996
ENSMUSG00000097035	GM26692	32.6123	-1.14836	0.412188	-2.786	0.00533633	0.0496941
ENSMUSG00000028034	FUBP1	5612.89	-1.15677	0.172143	-6.71986	1.81896e-11	4.84467e-09
ENSMUSG00000051285	PCMTD1	2659.38	-1.15706	0.334936	-3.45456	0.000551188	0.00885194
ENSMUSG00000022364	TBC1D31	1378.55	-1.15805	0.243092	-4.76384	1.8994e-06	9.30759e-05
ENSMUSG00000027122	ARL14EP	950.935	-1.15859	0.259853	-4.45864	8.24799e-06	0.000311792
ENSMUSG00000003271	SULT2B1	96.3456	-1.16035	0.290407	-3.9956	6.45304e-05	0.00172081
ENSMUSG00000032375	APH1B	68.024	-1.16125	0.328186	-3.53838	0.000402583	0.0069565
ENSMUSG00000033581	IGF2BP2	197.634	-1.16224	0.305166	-3.80855	0.000139783	0.00311433
ENSMUSG00000017417	PLXDC1	794.985	-1.16282	0.305391	-3.80765	0.000140292	0.00312163
ENSMUSG00000028081	RPS3A1	46605.1	-1.16335	0.412533	-2.82001	0.00480222	0.0459645
ENSMUSG00000082806	RPL13-PS1	150.126	-1.16384	0.38076	-3.05662	0.00223845	0.0260496
ENSMUSG00000107254	GM43769	76.5516	-1.16596	0.367865	-3.16954	0.00152681	0.0193524
ENSMUSG00000066456	HMGN3	651.831	-1.16672	0.274146	-4.25583	2.08271e-05	0.000686255
ENSMUSG00000043336	FILIP1L	608.389	-1.16838	0.265814	-4.39547	1.10536e-05	0.000399415
ENSMUSG00000028378	PTGR1	539.808	-1.17268	0.280247	-4.18446	2.85839e-05	0.000873255
ENSMUSG00000000901	MMP11	131.722	-1.17521	0.360631	-3.25877	0.00111898	0.0151849
ENSMUSG00000052125	F730043M19RIK	63.6777	-1.17772	0.416545	-2.82735	0.00469349	0.0451752
ENSMUSG00000032122	SLC37A2	413.043	-1.18473	0.237398	-4.99048	6.02303e-07	3.54781e-05
ENSMUSG00000034212	ANKMY1	38.3072	-1.18537	0.301329	-3.93382	8.36069e-05	0.00208714
ENSMUSG00000022178	AJUBA	120.734	-1.19377	0.380096	-3.14071	0.00168541	0.0209762
ENSMUSG00000029638	GLCCI1	396.12	-1.19813	0.417405	-2.87042	0.0040993	0.0409217
ENSMUSG00000035168	TANC1	342.14	-1.20172	0.427992	-2.80781	0.00498789	0.0472237
ENSMUSG00000022468	ENDOU	4284.06	-1.20237	0.332132	-3.62017	0.000294413	0.00554538
ENSMUSG00000032198	DOCK6	223.877	-1.20356	0.235571	-5.10911	3.23678e-07	2.08512e-05
ENSMUSG00000040061	PLCB2	2799.34	-1.20449	0.255916	-4.7066	2.51878e-06	0.000115528
ENSMUSG00000070427	IL18BP	153.176	-1.20978	0.318016	-3.80414	0.0001423	0.00315815
ENSMUSG00000028028	ALPK1	222.418	-1.21072	0.391924	-3.08917	0.00200718	0.023997
ENSMUSG00000031570	PLPP5	343.836	-1.21094	0.180348	-6.7145	1.88717e-11	4.84467e-09
ENSMUSG00000038648	CREB3L2	801.842	-1.21293	0.263857	-4.59692	4.28784e-06	0.000182551
ENSMUSG00000029287	TGFBR3	812.002	-1.22367	0.263036	-4.65209	3.28586e-06	0.000145978
ENSMUSG00000078439	SMIM24	540.679	-1.22651	0.196998	-6.226	4.78491e-10	8.31317e-08
ENSMUSG00000043157	ARL11	81.0788	-1.22821	0.315607	-3.8916	9.95867e-05	0.00237748
ENSMUSG00000040219	TTC12	123.646	-1.23254	0.344957	-3.57302	0.000352883	0.0063423
ENSMUSG00000097729	2310015A10RIK	120.163	-1.23362	0.23166	-5.32511	1.00895e-07	7.78201e-06
ENSMUSG00000061684	RPL21-PS8	29.6593	-1.23368	0.368585	-3.34706	0.000816729	0.0120066
ENSMUSG00000085525	GM13166	22.7474	-1.23787	0.380199	-3.25585	0.00113053	0.015252
ENSMUSG00000072653	ZFP783	509.511	-1.24195	0.3168	-3.92028	8.84464e-05	0.00218261
ENSMUSG00000002012	PNCK	115.777	-1.24356	0.374357	-3.32185	0.000894236	0.0128067
ENSMUSG00000097636	MIRT1	304.486	-1.24733	0.345768	-3.60741	0.000309268	0.0057383
ENSMUSG00000032679	CD59A	50.3151	-1.25221	0.313375	-3.99588	6.44532e-05	0.00172081
ENSMUSG00000097346	GM26619	908.747	-1.25585	0.346687	-3.62244	0.000291837	0.00550998
ENSMUSG00000108443	GM44510	438.33	-1.25912	0.36329	-3.46587	0.000528525	0.0085692
ENSMUSG00000078435	AU041133	70.0266	-1.26142	0.437059	-2.88615	0.00389987	0.0392388
ENSMUSG00000048281	DLEU7	92.4662	-1.26224	0.264527	-4.77166	1.82712e-06	9.03061e-05
ENSMUSG00000041921	METAP1D	483.087	-1.27799	0.200243	-6.38217	1.746e-10	3.45185e-08
ENSMUSG00000033427	UPB1	21.0566	-1.27845	0.442751	-2.88752	0.00388289	0.0391705
ENSMUSG00000052563	D930048N14RIK	56.2898	-1.28201	0.351501	-3.64724	0.000265071	0.0050998
ENSMUSG00000067220	CNGA1	99.5299	-1.28793	0.388413	-3.31587	0.000913568	0.0130425
ENSMUSG00000017390	ALDOC	127.954	-1.29585	0.269474	-4.80883	1.51816e-06	7.74849e-05
ENSMUSG00000040183	ANKRD6	85.3481	-1.29863	0.348303	-3.72845	0.000192662	0.00396386
ENSMUSG00000035085	1700020L24RIK	46.745	-1.30091	0.382629	-3.39993	0.000674037	0.0103698
ENSMUSG00000050147	F2RL3	258.065	-1.30308	0.272685	-4.77872	1.76419e-06	8.76994e-05
ENSMUSG00000073538	E330020D12RIK	62.6825	-1.31771	0.340577	-3.86905	0.00010926	0.00257083
ENSMUSG00000049687	FAM109B	580.282	-1.32351	0.316653	-4.17968	2.91925e-05	0.000890268
ENSMUSG00000037815	CTNNA1	1336.43	-1.32955	0.226989	-5.85735	4.70318e-09	5.71464e-07
ENSMUSG00000022197	PDZD2	135.708	-1.33033	0.377059	-3.52817	0.000418444	0.00717571
ENSMUSG00000037683	ARMC3	69.4934	-1.33168	0.322794	-4.12549	3.6995e-05	0.00108217
ENSMUSG00000030672	MYLPF	115.925	-1.33572	0.261667	-5.10468	3.31354e-07	2.1266e-05
ENSMUSG00000030342	CD9	470.757	-1.33907	0.335915	-3.98634	6.70993e-05	0.00177282
ENSMUSG00000005474	MYL10	5905.84	-1.34228	0.402889	-3.33164	0.000863356	0.0124803
ENSMUSG00000097817	GM26810	16.846	-1.34548	0.43432	-3.0979	0.00194894	0.0234747
ENSMUSG00000046463	5930403N24RIK	26.5821	-1.34705	0.476199	-2.82876	0.00467285	0.0450774
ENSMUSG00000030844	RGS10	1263.61	-1.34912	0.34378	-3.92436	8.69607e-05	0.00215212
ENSMUSG00000084808	9430091E24RIK	59.0914	-1.35115	0.2471	-5.46804	4.55052e-08	3.99331e-06
ENSMUSG00000038843	GCNT1	92.387	-1.35442	0.37315	-3.6297	0.000283747	0.00539277
ENSMUSG00000092627	D130058E05RIK	88.4368	-1.35585	0.46672	-2.90506	0.00367188	0.0377729
ENSMUSG00000038623	TM6SF1	3655.51	-1.36187	0.242252	-5.62172	1.89065e-08	1.8682e-06
ENSMUSG00000024008	CPNE5	220.186	-1.37682	0.365821	-3.76363	0.000167462	0.00357363
ENSMUSG00000092550	GM20496	14.9364	-1.38127	0.455468	-3.03264	0.00242423	0.0275802
ENSMUSG00000085379	2310058D17RIK	95.4305	-1.39171	0.267727	-5.19824	2.01179e-07	1.39527e-05
ENSMUSG00000032374	PLOD2	354.241	-1.3926	0.278231	-5.0052	5.58037e-07	3.33272e-05
ENSMUSG00000041801	PHLDA3	73.0726	-1.39458	0.329889	-4.22743	2.36373e-05	0.000752891
ENSMUSG00000030088	ALDH1L1	80.5412	-1.40357	0.393976	-3.56258	0.000367234	0.00650959
ENSMUSG00000025856	PDGFA	64.5559	-1.40751	0.442893	-3.17799	0.00148302	0.0189088
ENSMUSG00000075270	PDE11A	188.53	-1.41444	0.261547	-5.40797	6.37427e-08	5.27103e-06
ENSMUSG00000030170	WNT5B	237.973	-1.41573	0.359095	-3.94248	8.06418e-05	0.00204578
ENSMUSG00000037224	ZFYVE28	207.042	-1.42504	0.346778	-4.10938	3.96721e-05	0.00115069
ENSMUSG00000061544	ZFP229	94.1976	-1.42707	0.380736	-3.74819	0.000178117	0.00372702
ENSMUSG00000097352	C920009B18RIK	71.3953	-1.42877	0.462768	-3.08744	0.00201889	0.0240478
ENSMUSG00000050989	SELENON	177.948	-1.42979	0.341578	-4.18583	2.84128e-05	0.000869574
ENSMUSG00000025221	KCNIP2	27.6672	-1.43113	0.512886	-2.79035	0.00526512	0.049164
ENSMUSG00000022652	MORC1	64.6749	-1.43219	0.371334	-3.85687	0.00011485	0.00268399
ENSMUSG00000030339	LTBR	93.3006	-1.43325	0.36531	-3.92339	8.73102e-05	0.00215767
ENSMUSG00000040877	WDR25	354.916	-1.43355	0.154314	-9.28983	1.54533e-20	2.41633e-17
ENSMUSG00000075555	GM10863	47.5969	-1.44218	0.356221	-4.04856	5.15345e-05	0.00143887
ENSMUSG00000030124	LAG3	153.324	-1.44714	0.490621	-2.94962	0.00318166	0.0337217
ENSMUSG00000070304	SCN2B	264.441	-1.44881	0.445734	-3.25039	0.00115245	0.0154619
ENSMUSG00000082193	RPL5-PS1	23.0896	-1.45409	0.501544	-2.89922	0.0037409	0.0382541
ENSMUSG00000024766	LIPO3	134.145	-1.45451	0.366732	-3.96614	7.30464e-05	0.00189217
ENSMUSG00000029153	OCIAD2	97.9678	-1.45452	0.391723	-3.71314	0.000204705	0.00416028
ENSMUSG00000106634	GM43042	206.551	-1.45584	0.464223	-3.13607	0.00171228	0.0212604
ENSMUSG00000063239	GRM4	170.682	-1.4575	0.511593	-2.84895	0.00438635	0.0431856
ENSMUSG00000072244	TRIM6	48.7906	-1.47276	0.473867	-3.10796	0.00188385	0.0228346
ENSMUSG00000020589	FAM49A	224.133	-1.47372	0.231695	-6.36063	2.00928e-10	3.8831e-08
ENSMUSG00000103427	GM37534	64.2728	-1.48007	0.424688	-3.48508	0.000491988	0.00813673
ENSMUSG00000026090	2010300C02RIK	105.707	-1.4891	0.256785	-5.79901	6.6708e-09	7.75255e-07
ENSMUSG00000103156	GM38293	13.0764	-1.4933	0.491617	-3.03753	0.00238528	0.0272785
ENSMUSG00000075330	A930003A15RIK	221.143	-1.49574	0.452077	-3.3086	0.00093764	0.0133086
ENSMUSG00000051359	NCALD	231.338	-1.49632	0.342867	-4.36416	1.27615e-05	0.000455389
ENSMUSG00000030847	BAG3	314.363	-1.50255	0.249908	-6.0124	1.82792e-09	2.5355e-07
ENSMUSG00000029205	CHRNA9	118.17	-1.50357	0.40316	-3.72946	0.000191888	0.00395267
ENSMUSG00000087006	GM13889	52.6003	-1.50414	0.527466	-2.85164	0.00434944	0.0429204
ENSMUSG00000046442	PPM1E	97.5158	-1.50492	0.414272	-3.6327	0.000280475	0.0053483
ENSMUSG00000104835	GM5547	43.332	-1.50526	0.463462	-3.24787	0.00116273	0.0155633
ENSMUSG00000056671	PRELID2	474.089	-1.50755	0.458009	-3.29152	0.000996482	0.0140143
ENSMUSG00000058470	GM8369	51.5584	-1.51274	0.532563	-2.8405	0.00450427	0.044044
ENSMUSG00000033032	AFAP1L1	383.14	-1.51455	0.298138	-5.08002	3.77403e-07	2.36059e-05
ENSMUSG00000036853	MCOLN3	447.314	-1.51507	0.423614	-3.57653	0.000348182	0.00626436
ENSMUSG00000087543	GM16576	259.307	-1.51585	0.178065	-8.51292	1.696e-17	1.62062e-14
ENSMUSG00000054474	THNSL2	54.3624	-1.51593	0.363238	-4.17337	3.00129e-05	0.000908841
ENSMUSG00000072915	GM12258	544.433	-1.5183	0.297691	-5.10024	3.39218e-07	2.16094e-05
ENSMUSG00000079056	KCNIP3	33.0935	-1.52741	0.482089	-3.16832	0.00153321	0.0194049
ENSMUSG00000023045	SOAT2	27.1414	-1.53129	0.469909	-3.25869	0.00111929	0.0151849
ENSMUSG00000021253	TGFB3	485.982	-1.5339	0.507788	-3.02075	0.00252147	0.028383
ENSMUSG00000071715	NCF4	255.383	-1.53478	0.313401	-4.89717	9.7227e-07	5.39453e-05
ENSMUSG00000033763	MTSS1L	111.883	-1.54466	0.320255	-4.82321	1.41264e-06	7.36284e-05
ENSMUSG00000033722	BC034090	34.9588	-1.54694	0.474929	-3.2572	0.00112518	0.0152266
ENSMUSG00000043263	IFI209	1433.44	-1.54866	0.404403	-3.82948	0.000128413	0.00292543
ENSMUSG00000018398	2008-09-01	79.0684	-1.55223	0.537919	-2.88562	0.00390645	0.03927
ENSMUSG00000026928	CARD9	99.9518	-1.55271	0.386098	-4.02155	5.78154e-05	0.00157346
ENSMUSG00000030559	RAB38	186.216	-1.55387	0.523786	-2.96662	0.00301098	0.0324085
ENSMUSG00000050035	FHL4	52.3557	-1.55591	0.310651	-5.00855	5.48412e-07	3.28665e-05
ENSMUSG00000026604	PTPN14	2000.64	-1.56267	0.411176	-3.80048	0.000144418	0.00320102
ENSMUSG00000015316	SLAMF1	284.755	-1.57017	0.364852	-4.30358	1.68063e-05	0.000576984
ENSMUSG00000049230	GM9833	77.8635	-1.57041	0.356394	-4.40639	1.05109e-05	0.000387124
ENSMUSG00000043789	VWCE	237.672	-1.57157	0.507251	-3.09822	0.00194689	0.0234664
ENSMUSG00000029299	ABCG3	1076.78	-1.5735	0.283321	-5.55377	2.79574e-08	2.62769e-06
ENSMUSG00000020814	MXRA7	169.935	-1.57738	0.49948	-3.15804	0.00158834	0.0199079
ENSMUSG00000076473	TRBV16	19.8105	-1.57782	0.47359	-3.33161	0.000863461	0.0124803
ENSMUSG00000020475	PGAM2	86.004	-1.58052	0.397194	-3.97922	6.91417e-05	0.0018101
ENSMUSG00000030650	TMC5	48.5826	-1.58646	0.55538	-2.85653	0.00428298	0.0424026
ENSMUSG00000032053	POU2AF1	480.282	-1.58895	0.442503	-3.59084	0.000329619	0.00601214
ENSMUSG00000076747	TCRG-V5	12.4056	-1.5945	0.470019	-3.39242	0.000692794	0.0105454
ENSMUSG00000059631	1500035N22RIK	31.0474	-1.59904	0.528448	-3.02591	0.00247886	0.0280134
ENSMUSG00000026765	LYPD6B	255.14	-1.60409	0.254963	-6.29148	3.1446e-10	5.63407e-08
ENSMUSG00000086291	GM15513	35.1719	-1.60428	0.465004	-3.45004	0.000560506	0.00895976
ENSMUSG00000030029	LRIG1	297.366	-1.6061	0.331677	-4.84237	1.28297e-06	6.80376e-05
ENSMUSG00000043088	IL17RE	29.382	-1.61161	0.501611	-3.21288	0.00131411	0.0171103
ENSMUSG00000022123	SCEL	238.38	-1.61307	0.484392	-3.3301	0.000868139	0.0125163
ENSMUSG00000037709	FAM13A	47.7571	-1.61429	0.345124	-4.67744	2.90483e-06	0.000131482
ENSMUSG00000046794	PPP1R3B	395.785	-1.61479	0.257768	-6.26452	3.73966e-10	6.56348e-08
ENSMUSG00000101176	NA	13.8989	-1.62429	0.564614	-2.87681	0.00401719	0.0402421
ENSMUSG00000089718	2310075C17RIK	16.9913	-1.63078	0.477928	-3.41218	0.000644461	0.00999525
ENSMUSG00000084302	GM12194	9.6925	-1.63236	0.558825	-2.92106	0.00348844	0.0361671
ENSMUSG00000045838	A430105I19RIK	133.198	-1.63807	0.361812	-4.52742	5.97092e-06	0.000236091
ENSMUSG00000093801	TRAV14N-2	11.5248	-1.64714	0.520203	-3.16635	0.00154366	0.0194798
ENSMUSG00000095560	TRAV14D-2	11.5248	-1.64714	0.520203	-3.16635	0.00154366	0.0194798
ENSMUSG00000026204	PTPRN	786.418	-1.64756	0.45383	-3.63036	0.000283028	0.00538505
ENSMUSG00000026919	LCN4	383.106	-1.65277	0.443114	-3.7299	0.000191558	0.0039506
ENSMUSG00000004709	CD244	93.9218	-1.65799	0.573822	-2.88939	0.00385994	0.0390535
ENSMUSG00000039474	WFS1	170.798	-1.65875	0.36821	-4.50491	6.63999e-06	0.000259242
ENSMUSG00000044033	CCDC141	50.9015	-1.66042	0.30437	-5.45525	4.8903e-08	4.24814e-06
ENSMUSG00000036356	CSGALNACT1	89.6862	-1.66222	0.46055	-3.60921	0.000307127	0.00571708
ENSMUSG00000034245	HDAC11	145.953	-1.67138	0.303884	-5.50006	3.7966e-08	3.40112e-06
ENSMUSG00000025328	PADI3	146.808	-1.6824	0.401447	-4.19084	2.77922e-05	0.000859111
ENSMUSG00000059900	TMEM40	66.6948	-1.68241	0.469099	-3.58648	0.000335173	0.00607478
ENSMUSG00000031078	CTTN	64.5459	-1.68493	0.561472	-3.00092	0.00269165	0.0297534
ENSMUSG00000036273	LRRK2	60.4801	-1.68796	0.438223	-3.85182	0.000117244	0.00273623
ENSMUSG00000005883	SPO11	173.789	-1.71368	0.357316	-4.79599	1.61871e-06	8.16475e-05
ENSMUSG00000040298	BTBD16	21.6218	-1.71553	0.499403	-3.43517	0.000592178	0.00937888
ENSMUSG00000108980	GM45155	14.7775	-1.73968	0.462783	-3.75917	0.000170476	0.00361359
ENSMUSG00000058099	NFAM1	55.1403	-1.74217	0.420872	-4.13942	3.48187e-05	0.00102901
ENSMUSG00000105558	GM5855	31.689	-1.7448	0.531928	-3.28015	0.00103753	0.0144309
ENSMUSG00000037579	KCNH3	187.839	-1.74907	0.362249	-4.82836	1.37665e-06	7.20935e-05
ENSMUSG00000001865	CPA3	9051.1	-1.76247	0.557697	-3.16027	0.00157622	0.0198325
ENSMUSG00000069255	DUSP22	66.7929	-1.78154	0.340105	-5.2382	1.62153e-07	1.15728e-05
ENSMUSG00000105186	GM43778	12.1556	-1.78755	0.535755	-3.3365	0.000848394	0.0123351
ENSMUSG00000049515	ESPNL	112.45	-1.79781	0.455412	-3.94765	7.89216e-05	0.00200806
ENSMUSG00000050108	BPIFC	462.343	-1.8014	0.58701	-3.06876	0.00214947	0.0252707
ENSMUSG00000097039	PVT1	57.0693	-1.80555	0.298384	-6.05111	1.43855e-09	2.07925e-07
ENSMUSG00000028573	FGGY	132.271	-1.80678	0.233285	-7.74496	9.56145e-15	4.98354e-12
ENSMUSG00000079110	CAPN3	182.46	-1.80728	0.324407	-5.57102	2.53255e-08	2.40662e-06
ENSMUSG00000068323	SLC4A5	38.0837	-1.80853	0.498871	-3.62525	0.000288687	0.00545651
ENSMUSG00000087326	GM12503	103.895	-1.81248	0.594686	-3.04778	0.00230535	0.0265942
ENSMUSG00000022824	MUC13	764.801	-1.81871	0.430901	-4.22071	2.43531e-05	0.000771406
ENSMUSG00000086779	GM13562	25.081	-1.82928	0.530369	-3.44907	0.000562525	0.00897536
ENSMUSG00000086894	GM15708	346.226	-1.82988	0.442797	-4.13255	3.58768e-05	0.00105304
ENSMUSG00000102727	NA	125.14	-1.83068	0.493706	-3.70804	0.000208871	0.00421233
ENSMUSG00000040229	GPR34	141.219	-1.83222	0.619524	-2.95745	0.0031019	0.0331854
ENSMUSG00000046480	SCN4B	1455.2	-1.83306	0.513915	-3.56685	0.000361303	0.00644648
ENSMUSG00000021338	CARMIL1	58.9483	-1.8363	0.540789	-3.39559	0.000684797	0.0104791
ENSMUSG00000040511	PVR	98.1549	-1.83661	0.40325	-4.55452	5.25063e-06	0.000211752
ENSMUSG00000061311	RAG1	4044.42	-1.83941	0.61884	-2.97235	0.00295527	0.0319088
ENSMUSG00000101191	GM28809	38.0041	-1.85637	0.493878	-3.75877	0.000170752	0.00361359
ENSMUSG00000036553	SH3TC1	73.7856	-1.86092	0.506011	-3.67763	0.000235413	0.00466487
ENSMUSG00000064080	FBLN2	279.656	-1.86455	0.507515	-3.67389	0.000238884	0.00471193
ENSMUSG00000085417	GM13919	36.7131	-1.8647	0.461588	-4.03974	5.35095e-05	0.00147968
ENSMUSG00000020787	P2RX1	132.304	-1.86726	0.515908	-3.61937	0.000295324	0.00554538
ENSMUSG00000052160	PLD4	4128.68	-1.86753	0.260646	-7.165	7.77878e-13	2.97322e-10
ENSMUSG00000105343	GM43512	5.23248	-1.86837	0.668576	-2.79455	0.00519724	0.0487094
ENSMUSG00000032719	SBSPON	47.082	-1.87265	0.52614	-3.55922	0.000371955	0.00656903
ENSMUSG00000032377	PLSCR4	46.6586	-1.87433	0.5464	-3.43033	0.000602846	0.00947801
ENSMUSG00000043592	UNC5CL	199.422	-1.87457	0.427887	-4.38099	1.18142e-05	0.000426005
ENSMUSG00000004698	HDAC9	308.246	-1.87757	0.472829	-3.97093	7.15915e-05	0.00186289
ENSMUSG00000027249	F2	42.9857	-1.88666	0.478897	-3.9396	8.16182e-05	0.00205539
ENSMUSG00000103527	GM37261	35.8917	-1.8892	0.606021	-3.11739	0.00182462	0.0223052
ENSMUSG00000015829	TNR	33.9635	-1.89783	0.657119	-2.88812	0.00387558	0.0391197
ENSMUSG00000106219	5830416I19RIK	82.6134	-1.92055	0.287627	-6.67721	2.43542e-11	5.98416e-09
ENSMUSG00000044303	CDKN2A	17.8172	-1.94503	0.671781	-2.89533	0.00378755	0.0385479
ENSMUSG00000030996	ART1	26.8088	-1.95165	0.495255	-3.94071	8.12411e-05	0.00205191
ENSMUSG00000027875	HMGCS2	633.872	-1.95864	0.646009	-3.03191	0.00243011	0.0276076
ENSMUSG00000035277	ARX	26.3807	-1.96434	0.481243	-4.08181	4.46869e-05	0.00128103
ENSMUSG00000034427	MYO15B	68.8086	-1.96549	0.403869	-4.86664	1.13511e-06	6.15449e-05
ENSMUSG00000020811	WSCD1	149.724	-1.99173	0.473973	-4.20221	2.64326e-05	0.000829709
ENSMUSG00000047085	LRRC4B	127.221	-2.00993	0.672232	-2.98994	0.00279032	0.0306276
ENSMUSG00000066180	GM10155	7.21536	-2.01177	0.628323	-3.20181	0.00136569	0.0176312
ENSMUSG00000033949	TRIM36	153.228	-2.01652	0.500474	-4.02922	5.59617e-05	0.00153761
ENSMUSG00000070337	GPR179	138.164	-2.02046	0.303545	-6.65622	2.80954e-11	6.7686e-09
ENSMUSG00000048905	4930539E08RIK	159.293	-2.02331	0.336483	-6.01311	1.81994e-09	2.5355e-07
ENSMUSG00000085550	GM15658	16.8676	-2.02467	0.597261	-3.38992	0.000699137	0.0105949
ENSMUSG00000039115	ITGA9	313.706	-2.03539	0.32144	-6.33208	2.41876e-10	4.52204e-08
ENSMUSG00000013611	SNX31	40.9838	-2.03727	0.537724	-3.78869	0.000151447	0.0033141
ENSMUSG00000043460	ELFN2	411.939	-2.03793	0.367485	-5.54562	2.92908e-08	2.73805e-06
ENSMUSG00000038793	LEFTY1	17.0132	-2.04304	0.532357	-3.83772	0.000124182	0.00286692
ENSMUSG00000074604	MGST2	522.801	-2.05997	0.372131	-5.53561	3.10145e-08	2.88351e-06
ENSMUSG00000069805	FBP1	231.013	-2.07241	0.292616	-7.08236	1.41721e-12	4.77962e-10
ENSMUSG00000059146	NTRK3	96.5362	-2.07744	0.411338	-5.05045	4.40771e-07	2.69796e-05
ENSMUSG00000044265	OLFM5	277.796	-2.07869	0.670841	-3.09863	0.00194418	0.0234502
ENSMUSG00000031383	DUSP9	40.0246	-2.07984	0.501545	-4.14686	3.37059e-05	0.000999554
ENSMUSG00000075225	CCDC162	88.4016	-2.09837	0.369134	-5.68457	1.31139e-08	1.36702e-06
ENSMUSG00000044461	SHISA2	39.2318	-2.10325	0.592909	-3.54734	0.000389138	0.00678132
ENSMUSG00000097368	GM10390	86.6966	-2.10748	0.292478	-7.20559	5.7791e-13	2.31164e-10
ENSMUSG00000085511	GM11738	28.111	-2.11055	0.626027	-3.37134	0.000748026	0.0111879
ENSMUSG00000040964	ARHGEF10L	1530.52	-2.11486	0.518343	-4.08005	4.50263e-05	0.00128861
ENSMUSG00000043557	MDGA1	472.146	-2.11529	0.650489	-3.25184	0.0011466	0.0154315
ENSMUSG00000024866	ACY3	154.733	-2.1153	0.24614	-8.59389	8.40767e-18	9.03825e-15
ENSMUSG00000106588	GM17590	3106.03	-2.11985	0.445236	-4.76118	1.92467e-06	9.35149e-05
ENSMUSG00000044678	LY6K	419.095	-2.13407	0.558474	-3.82125	0.000132775	0.0029931
ENSMUSG00000103169	NA	36.516	-2.14404	0.434532	-4.93415	8.05009e-07	4.57727e-05
ENSMUSG00000041912	TDRKH	138.224	-2.15035	0.373671	-5.75466	8.68157e-09	9.57198e-07
ENSMUSG00000032698	LMO2	369.697	-2.18485	0.636078	-3.43487	0.000592836	0.00938067
ENSMUSG00000036586	GRIFIN	28.6945	-2.19189	0.523529	-4.18675	2.82973e-05	0.00086779
ENSMUSG00000016150	TENM1	547.308	-2.19777	0.628006	-3.4996	0.000465951	0.00781888
ENSMUSG00000081548	GM11692	9.46382	-2.19803	0.568668	-3.86523	0.000110983	0.00260425
ENSMUSG00000033255	GM5134	69.2184	-2.20366	0.403444	-5.46213	4.70467e-08	4.10763e-06
ENSMUSG00000074673	TTLL9	120.272	-2.20468	0.331282	-6.65498	2.83337e-11	6.7686e-09
ENSMUSG00000001552	JUP	493.17	-2.20765	0.576706	-3.82803	0.000129172	0.00293884
ENSMUSG00000020363	GFPT2	35.5543	-2.20877	0.451485	-4.89223	9.96993e-07	5.49624e-05
ENSMUSG00000047592	NXPE5	44.4038	-2.21268	0.651596	-3.39579	0.000684302	0.0104791
ENSMUSG00000041729	CORO2B	311.767	-2.22437	0.339252	-6.55668	5.50192e-11	1.24517e-08
ENSMUSG00000055003	LRTM2	30.563	-2.23705	0.448009	-4.99331	5.93537e-07	3.50819e-05
ENSMUSG00000000120	NGFR	36.6058	-2.23966	0.573246	-3.90698	9.34567e-05	0.00228332
ENSMUSG00000001247	LSR	106.483	-2.24182	0.378449	-5.9237	3.14773e-09	3.98095e-07
ENSMUSG00000046768	RHOJ	118.671	-2.24325	0.56937	-3.93988	8.15233e-05	0.00205539
ENSMUSG00000087066	GM15518	144.829	-2.24478	0.375933	-5.97121	2.35498e-09	3.16451e-07
ENSMUSG00000078490	CFAP74	46.6594	-2.25503	0.598448	-3.76813	0.000164478	0.00353602
ENSMUSG00000051618	UBQLN3	35.3634	-2.27454	0.66167	-3.43758	0.000586945	0.00930457
ENSMUSG00000098197	BC051537	21.0541	-2.2984	0.497853	-4.61663	3.90019e-06	0.000168975
ENSMUSG00000009614	SARDH	17.1458	-2.30573	0.574921	-4.01051	6.05866e-05	0.00163593
ENSMUSG00000048078	TENM4	288.998	-2.30939	0.651462	-3.54493	0.000392721	0.00682304
ENSMUSG00000002500	RPL3L	33.4791	-2.31799	0.508694	-4.55676	5.19498e-06	0.00021074
ENSMUSG00000051437	UBQLNL	23.3166	-2.3318	0.67249	-3.46742	0.000525483	0.00853476
ENSMUSG00000027596	A	16.3799	-2.34786	0.578796	-4.05646	4.9823e-05	0.00140026
ENSMUSG00000032372	PLSCR2	32.5818	-2.3658	0.664943	-3.5579	0.00037383	0.00658124
ENSMUSG00000072949	ACOT1	34.0081	-2.4006	0.525981	-4.56404	5.01796e-06	0.000205009
ENSMUSG00000108393	GM45055	15.7908	-2.41719	0.472064	-5.12047	3.04772e-07	1.9707e-05
ENSMUSG00000034930	RTKN	129.375	-2.42319	0.391794	-6.18485	6.21602e-10	1.03801e-07
ENSMUSG00000025330	PADI4	135.317	-2.42601	0.396428	-6.11967	9.37694e-10	1.44003e-07
ENSMUSG00000039109	F13A1	116.112	-2.45029	0.515269	-4.75537	1.98081e-06	9.59718e-05
ENSMUSG00000029716	TFR2	34.402	-2.4561	0.495544	-4.95637	7.18217e-07	4.15937e-05
ENSMUSG00000019235	RPS6KL1	203.645	-2.45975	0.403703	-6.09296	1.10844e-09	1.65784e-07
ENSMUSG00000024827	GLDC	51.9344	-2.50431	0.671022	-3.73209	0.000189898	0.00392107
ENSMUSG00000030022	ADAMTS9	217.465	-2.51016	0.662213	-3.79056	0.000150307	0.00329755
ENSMUSG00000109002	GM44900	9.35929	-2.54709	0.650655	-3.91466	9.05331e-05	0.00222453
ENSMUSG00000030089	SLC41A3	204.273	-2.59998	0.338202	-7.68766	1.49855e-14	7.33195e-12
ENSMUSG00000044164	RNF182	30.1791	-2.61529	0.607415	-4.3056	1.66532e-05	0.000576327
ENSMUSG00000034450	GULO	37.9653	-2.63154	0.49362	-5.33111	9.76146e-08	7.59716e-06
ENSMUSG00000034226	RHOV	26.6525	-2.6869	0.55916	-4.80524	1.54562e-06	7.8653e-05
ENSMUSG00000027737	SLC7A11	65.3123	-2.69091	0.53867	-4.99548	5.86909e-07	3.48098e-05
ENSMUSG00000021055	ESR2	31.5818	-2.69161	0.668707	-4.02509	5.69525e-05	0.00155689
ENSMUSG00000024909	EFEMP2	103.218	-2.70172	0.495727	-5.45001	5.0367e-08	4.33536e-06
ENSMUSG00000029814	IGF2BP3	223.459	-2.70278	0.62909	-4.29634	1.73643e-05	0.000591419
ENSMUSG00000047230	CLDN2	101.924	-2.81613	0.670743	-4.19852	2.68665e-05	0.000837143
ENSMUSG00000038305	SPATS2L	120.721	-2.83147	0.421691	-6.71456	1.88628e-11	4.84467e-09
ENSMUSG00000052852	REEP1	57.3292	-2.85043	0.598672	-4.76125	1.92395e-06	9.35149e-05
ENSMUSG00000037535	1700021A07RIK	13.503	-2.92612	0.611165	-4.78778	1.68635e-06	8.45634e-05
ENSMUSG00000032511	SCN5A	122.183	-2.9494	0.649098	-4.54385	5.52355e-06	0.000221457
ENSMUSG00000038390	GPR162	46.7144	-2.96011	0.594903	-4.97578	6.49853e-07	3.78897e-05
ENSMUSG00000021751	ACOX2	91.539	-2.96045	0.666035	-4.44489	8.79379e-06	0.00033097
ENSMUSG00000016179	CAMK1G	19.998	-2.96983	0.646722	-4.59212	4.38764e-06	0.00018588
ENSMUSG00000024168	TMEM204	57.2001	-2.97622	0.619487	-4.80433	1.55272e-06	7.87808e-05
ENSMUSG00000105263	GM42427	3635.32	-3.00676	0.631065	-4.76458	1.89246e-06	9.3001e-05
ENSMUSG00000059887	OLFR1507	21.2174	-3.14317	0.665729	-4.72139	2.34237e-06	0.000109102
ENSMUSG00000037577	EPHX3	71.8791	-3.19856	0.59511	-5.37474	7.66919e-08	6.16402e-06
ENSMUSG00000016200	SYT14	83.5503	-3.36526	0.549709	-6.12189	9.24701e-10	1.43287e-07
ENSMUSG00000009216	FAM163B	923.256	-3.55329	0.581484	-6.11072	9.91846e-10	1.50971e-07
ENSMUSG00000085903	GM15340	27.3977	-3.56601	0.613508	-5.8125	6.15473e-09	7.30078e-07
ENSMUSG00000037206	ISLR	68.2221	-3.57487	0.617574	-5.78856	7.09905e-09	8.14024e-07
ENSMUSG00000032561	ACPP	167.116	-3.59088	0.467282	-7.68461	1.53459e-14	7.33195e-12
ENSMUSG00000021983	ATP8A2	140.841	-3.63046	0.525974	-6.90236	5.11445e-12	1.51889e-09
ENSMUSG00000102715	GM6209	16.3326	-3.63663	0.63744	-5.70505	1.16311e-08	1.23491e-06
ENSMUSG00000102895	5830415G21RIK	15.9269	-3.65355	0.623811	-5.85683	4.7179e-09	5.71464e-07
ENSMUSG00000021913	OGDHL	389.596	-3.97096	0.328147	-12.1011	1.04142e-33	5.97083e-30
ENSMUSG00000045591	OLIG3	40.8484	-4.48609	0.655278	-6.84608	7.59009e-12	2.21271e-09

## Sheet: 24 hours KO vs HET filtered
ID	gene	baseMean	log2FoldChange	lfcSE	stat	pvalue	padj
ENSMUSG00000022996	WNT10B	204.692	4.75486	0.397452	11.9633	5.52941e-33	9.23136e-29
ENSMUSG00000036256	IGFBP7	35.3097	4.71772	0.617579	7.63906	2.18821e-14	8.11825e-12
ENSMUSG00000015396	CD83	51.6602	4.71488	0.414649	11.3708	5.84737e-30	2.44055e-26
ENSMUSG00000050272	DSCAM	244.711	4.51877	0.390746	11.5645	6.2375e-31	5.20675e-27
ENSMUSG00000026573	XCL1	138.835	4.40281	0.629523	6.99388	2.6738e-12	6.11494e-10
ENSMUSG00000028042	ZBTB7B	52.9004	4.33095	0.507314	8.53701	1.37741e-17	1.14979e-14
ENSMUSG00000047880	CXCR5	200.214	4.08101	0.492666	8.28352	1.19583e-16	7.98575e-14
ENSMUSG00000017737	MMP9	198.987	4.0357	0.656064	6.15138	7.68124e-10	9.22578e-08
ENSMUSG00000020120	PLEK	230.022	3.92872	0.456699	8.60242	7.80526e-18	7.66523e-15
ENSMUSG00000104213	IGHD	93.1549	3.73059	0.336655	11.0813	1.54546e-28	5.16028e-25
ENSMUSG00000050650	MRGPRA1	16.8266	3.68861	0.605043	6.09645	1.0845e-09	1.23224e-07
ENSMUSG00000048481	MYPOP	71.8547	3.68268	0.347074	10.6107	2.65891e-26	7.39841e-23
ENSMUSG00000026764	KIF5C	49.628	3.64984	0.411789	8.86337	7.76344e-19	9.2579e-16
ENSMUSG00000021200	ASB2	277.038	3.63181	0.493874	7.35372	1.92768e-13	5.85137e-11
ENSMUSG00000108090	GM6637	30.6277	3.5348	0.455589	7.75874	8.57791e-15	3.73218e-12
ENSMUSG00000058715	FCER1G	189.067	3.40731	0.354124	9.6218	6.46886e-22	1.19997e-18
ENSMUSG00000043099	HIC1	77.053	3.3756	0.53181	6.34738	2.19013e-10	2.97271e-08
ENSMUSG00000041481	SERPINA3G	170.258	3.30443	0.501558	6.58834	4.4477e-11	7.73483e-09
ENSMUSG00000017009	SDC4	90.9192	3.21402	0.510579	6.29485	3.07689e-10	4.02281e-08
ENSMUSG00000029419	GM996	47.2574	3.19711	0.477607	6.69401	2.17139e-11	3.98367e-09
ENSMUSG00000040998	NPNT	228.808	3.18403	0.410489	7.75668	8.71848e-15	3.73218e-12
ENSMUSG00000035042	CCL5	172.739	3.18312	0.510369	6.2369	4.46325e-10	5.51955e-08
ENSMUSG00000049709	NLRP10	52.8229	3.18064	0.434532	7.31971	2.48514e-13	7.40882e-11
ENSMUSG00000066363	SERPINA3F	57.9449	3.08109	0.559942	5.50252	3.74397e-08	2.74421e-06
ENSMUSG00000026068	IL18RAP	51.1289	3.06217	0.61152	5.00748	5.51487e-07	2.83295e-05
ENSMUSG00000068923	SYT11	926.687	3.01097	0.334351	9.00544	2.148e-19	2.9884e-16
ENSMUSG00000089762	IER5L	25.7273	2.98464	0.490546	6.08432	1.16989e-09	1.30209e-07
ENSMUSG00000020614	FAM20A	437.361	2.98056	0.55756	5.34573	9.00549e-08	5.82739e-06
ENSMUSG00000034818	CELF5	70.9275	2.94628	0.471678	6.24638	4.20077e-10	5.27308e-08
ENSMUSG00000029304	SPP1	16.9297	2.93461	0.522222	5.61947	1.91544e-08	1.53006e-06
ENSMUSG00000047205	DUSP18	56.3447	2.88514	0.503134	5.73434	9.78911e-09	8.60154e-07
ENSMUSG00000015243	ABCA1	609.989	2.87796	0.469094	6.13514	8.5083e-10	1.00742e-07
ENSMUSG00000028214	GEM	801.86	2.85978	0.333308	8.57999	9.48783e-18	8.79996e-15
ENSMUSG00000049580	TSKU	20.1052	2.85045	0.506219	5.63087	1.79299e-08	1.44608e-06
ENSMUSG00000031520	VEGFC	33.3624	2.83989	0.4419	6.42654	1.30537e-10	1.91168e-08
ENSMUSG00000025351	CD63	30.8966	2.82757	0.443627	6.37376	1.84447e-10	2.54491e-08
ENSMUSG00000036587	FUT7	452.479	2.79364	0.426242	6.55411	5.59755e-11	9.25259e-09
ENSMUSG00000030077	CHL1	47.4272	2.78782	0.629033	4.43192	9.33985e-06	0.000298779
ENSMUSG00000036578	FXYD7	10.8464	2.78149	0.624137	4.45653	8.32953e-06	0.000269499
ENSMUSG00000044258	CTLA2A	2042.43	2.76689	0.356402	7.7634	8.26826e-15	3.73077e-12
ENSMUSG00000031355	ARHGAP6	39.7575	2.75435	0.484078	5.6899	1.27111e-08	1.07177e-06
ENSMUSG00000068551	ZFP467	364.246	2.68988	0.314189	8.56134	1.11567e-17	9.80321e-15
ENSMUSG00000026357	RGS18	298.234	2.66148	0.413151	6.44191	1.17981e-10	1.75866e-08
ENSMUSG00000032470	MRAS	100.279	2.6577	0.364748	7.28639	3.18374e-13	9.16423e-11
ENSMUSG00000021879	DNAH12	182.684	2.64498	0.449985	5.87792	4.15444e-09	4.00915e-07
ENSMUSG00000039851	4932438H23RIK	70.8305	2.63359	0.438475	6.00625	1.89869e-09	1.99362e-07
ENSMUSG00000022868	AHSG	45.0507	2.6319	0.577829	4.5548	5.24352e-06	0.000181243
ENSMUSG00000062524	NCR1	19.7227	2.60374	0.591229	4.40394	1.06301e-05	0.000334218
ENSMUSG00000001865	CPA3	9051.1	2.6029	0.557649	4.66764	3.04676e-06	0.000115213
ENSMUSG00000072945	RIPPLY1	20.7691	2.59874	0.645943	4.02317	5.74194e-05	0.0013078
ENSMUSG00000032769	TRPA1	46.9389	2.59611	0.412628	6.29164	3.14121e-10	4.03404e-08
ENSMUSG00000022114	SPRY2	242.963	2.59581	0.478771	5.42182	5.89939e-08	4.03649e-06
ENSMUSG00000103034	GM8797	1290.56	2.57837	0.555536	4.64122	3.46352e-06	0.000128212
ENSMUSG00000026475	RGS16	38.6773	2.53693	0.562993	4.50614	6.60165e-06	0.000220871
ENSMUSG00000028965	TNFRSF9	767.094	2.52399	0.482719	5.22871	1.707e-07	1.02145e-05
ENSMUSG00000019851	PERP	35.9137	2.52353	0.499695	5.05014	4.41476e-07	2.33242e-05
ENSMUSG00000025608	PODXL	242.695	2.50222	0.630404	3.96923	7.21041e-05	0.00156742
ENSMUSG00000047821	TRIM16	1128.42	2.46275	0.319317	7.71255	1.23324e-14	5.02171e-12
ENSMUSG00000083218	GM16425	42.5137	2.45236	0.640667	3.82782	0.000129284	0.00250976
ENSMUSG00000015222	MAP2	23.7644	2.45235	0.579893	4.22897	2.34765e-05	0.000637302
ENSMUSG00000025094	SLC18A2	68.0684	2.44949	0.412391	5.93973	2.855e-09	2.85415e-07
ENSMUSG00000028392	BSPRY	256.461	2.44467	0.411256	5.9444	2.77474e-09	2.79062e-07
ENSMUSG00000034041	LYL1	401.658	2.4409	0.633002	3.85606	0.000115227	0.00228742
ENSMUSG00000062593	LILRB4A	105.066	2.43039	0.435211	5.58438	2.3453e-08	1.81272e-06
ENSMUSG00000035298	KLHL35	30.6559	2.42113	0.423289	5.7198	1.0665e-08	9.17791e-07
ENSMUSG00000041762	GPR155	90.3075	2.393	0.347673	6.8829	5.86449e-12	1.25523e-09
ENSMUSG00000003032	KLF4	32.3313	2.38573	0.466082	5.11869	3.07661e-07	1.7008e-05
ENSMUSG00000026358	RGS1	415.643	2.37711	0.377718	6.29336	3.10676e-10	4.02281e-08
ENSMUSG00000066362	RPS13-PS1	1039.01	2.37513	0.66747	3.55841	0.000373108	0.00570425
ENSMUSG00000020669	SH3YL1	39.8551	2.37221	0.394107	6.0192	1.7528e-09	1.87583e-07
ENSMUSG00000092500	GM20400	198.893	2.36105	0.444331	5.31372	1.0741e-07	6.89699e-06
ENSMUSG00000086320	GM12840	172.401	2.34403	0.422627	5.54633	2.91732e-08	2.21385e-06
ENSMUSG00000105112	GM42778	19.105	2.3222	0.588361	3.9469	7.91704e-05	0.00168806
ENSMUSG00000003228	GRK5	287.279	2.31386	0.201341	11.4922	1.44306e-30	8.03065e-27
ENSMUSG00000027562	CAR2	52.1858	2.30655	0.47939	4.81143	1.49853e-06	6.48132e-05
ENSMUSG00000003273	CAR11	13.41	2.29997	0.602091	3.81998	0.000133464	0.00256228
ENSMUSG00000030577	CD22	25.2449	2.29946	0.609583	3.77219	0.00016182	0.00299842
ENSMUSG00000000982	CCL3	96.5099	2.26828	0.670805	3.38143	0.000721093	0.00962788
ENSMUSG00000074874	CTLA2B	73.93	2.26722	0.538767	4.20816	2.5746e-05	0.000688829
ENSMUSG00000027175	TCP11L1	108.947	2.26157	0.334217	6.76677	1.31686e-11	2.61727e-09
ENSMUSG00000022883	ROBO1	67.8222	2.26089	0.517224	4.37119	1.2357e-05	0.000379228
ENSMUSG00000056413	ADAP1	412.79	2.25988	0.360622	6.26663	3.68948e-10	4.66636e-08
ENSMUSG00000024610	CD74	1265.79	2.25597	0.331462	6.80612	1.00263e-11	2.09236e-09
ENSMUSG00000027254	MAP1A	152.301	2.24758	0.396548	5.66787	1.44585e-08	1.20092e-06
ENSMUSG00000070392	GM20634	239.873	2.24596	0.277846	8.08349	6.29371e-16	3.71139e-13
ENSMUSG00000032698	LMO2	369.697	2.23953	0.636381	3.51916	0.000432908	0.00639028
ENSMUSG00000062785	KCNC3	59.2078	2.23442	0.367129	6.0862	1.15621e-09	1.29602e-07
ENSMUSG00000084403	RPS15A-PS8	203.446	2.22527	0.65529	3.39586	0.000684131	0.00923492
ENSMUSG00000052364	B630019K06RIK	36.9194	2.22217	0.475107	4.6772	2.90812e-06	0.000110595
ENSMUSG00000026826	NR4A2	161.562	2.20986	0.370784	5.95997	2.52282e-09	2.58396e-07
ENSMUSG00000051062	FBLL1	13.3469	2.206	0.600752	3.67207	0.000240597	0.00409457
ENSMUSG00000091682	TCRG-C3	348.336	2.20436	0.339533	6.49231	8.453e-11	1.33135e-08
ENSMUSG00000041907	GPR45	72.6813	2.19665	0.477522	4.6001	4.22278e-06	0.000151794
ENSMUSG00000046280	SHE	233.92	2.16403	0.475901	4.54722	5.43584e-06	0.000186731
ENSMUSG00000036867	SMAD6	34.0719	2.15362	0.444037	4.85009	1.23407e-06	5.51829e-05
ENSMUSG00000042763	MANEAL	25.1092	2.15253	0.414533	5.19267	2.073e-07	1.21862e-05
ENSMUSG00000029070	MXRA8	25.2097	2.15218	0.433242	4.96761	6.77832e-07	3.33817e-05
ENSMUSG00000028950	TAS1R1	154.398	2.14932	0.548005	3.92209	8.7785e-05	0.00183196
ENSMUSG00000029108	PCDH7	294.227	2.13691	0.393043	5.43684	5.42333e-08	3.75695e-06
ENSMUSG00000043807	LY6G5B	84.6085	2.12988	0.32881	6.47756	9.32197e-11	1.44102e-08
ENSMUSG00000022696	SIDT1	769.957	2.12905	0.334932	6.35666	2.06192e-10	2.82162e-08
ENSMUSG00000056043	RGS9BP	61.3673	2.12691	0.400335	5.31282	1.0794e-07	6.90445e-06
ENSMUSG00000021217	TSHZ3	40.9919	2.11361	0.404017	5.23148	1.68155e-07	1.01066e-05
ENSMUSG00000004267	ENO2	36.1271	2.10537	0.435796	4.83108	1.35797e-06	5.96614e-05
ENSMUSG00000051314	FFAR2	33.7806	2.10237	0.519488	4.04701	5.18751e-05	0.00121127
ENSMUSG00000028332	HEMGN	114.508	2.09536	0.455761	4.59749	4.27609e-06	0.000152541
ENSMUSG00000058975	KCNC1	55.7316	2.09476	0.546636	3.83209	0.00012706	0.00248101
ENSMUSG00000050138	KCNK12	62.0554	2.08666	0.508435	4.10408	4.05927e-05	0.000997376
ENSMUSG00000003153	SLC2A3	2696.17	2.08585	0.217891	9.57292	1.0393e-21	1.73511e-18
ENSMUSG00000038560	SP6	59.7111	2.07696	0.445958	4.6573	3.20379e-06	0.000120467
ENSMUSG00000030970	CTBP2	32.2393	2.0708	0.453263	4.56866	4.90858e-06	0.000172524
ENSMUSG00000030789	ITGAX	56.4149	2.06714	0.543119	3.80606	0.000141196	0.00267567
ENSMUSG00000070469	ADAMTSL3	62.6124	2.06381	0.553582	3.7281	0.000192928	0.00344853
ENSMUSG00000019302	ATP6V0A1	199.907	2.06175	0.327612	6.29327	3.10837e-10	4.02281e-08
ENSMUSG00000069136	A130006I12RIK	5.92444	2.05568	0.575648	3.57107	0.000355519	0.00551616
ENSMUSG00000043017	PTGIR	925.361	2.05103	0.449024	4.56775	4.92994e-06	0.000172911
ENSMUSG00000034177	RNF43	86.068	2.04384	0.609237	3.35476	0.000794341	0.0103444
ENSMUSG00000073409	H2-Q6	7629.99	2.04208	0.41012	4.97923	6.38369e-07	3.21264e-05
ENSMUSG00000034394	LIF	774.555	2.03806	0.424864	4.79698	1.61076e-06	6.8601e-05
ENSMUSG00000030499	KCTD15	88.5687	2.03762	0.444336	4.58578	4.52303e-06	0.000160664
ENSMUSG00000056758	HMGA2	105.018	2.03627	0.566867	3.59215	0.000327959	0.00520464
ENSMUSG00000039232	STX11	48.4063	2.02218	0.344886	5.86332	4.53699e-09	4.3037e-07
ENSMUSG00000036989	TRIM3	148.733	2.01303	0.261642	7.69385	1.42773e-14	5.67185e-12
ENSMUSG00000018930	CCL4	257.896	2.0126	0.468415	4.29662	1.73423e-05	0.000498329
ENSMUSG00000079227	CCR5	28.8499	2.01066	0.44994	4.46872	7.8688e-06	0.000257587
ENSMUSG00000026989	DAPL1	68.3875	2.00281	0.670254	2.98813	0.00280688	0.0263264
ENSMUSG00000044037	ALS2CL	758.681	1.99824	0.466228	4.28597	1.81947e-05	0.000518362
ENSMUSG00000033377	PALMD	93.0718	1.9914	0.672712	2.96026	0.00307376	0.0280417
ENSMUSG00000002083	BBC3	309.925	1.98924	0.307359	6.47205	9.668e-11	1.4808e-08
ENSMUSG00000017607	TNS4	113.923	1.98585	0.559739	3.54782	0.000388429	0.00588994
ENSMUSG00000020646	MBOAT2	35.3334	1.97642	0.449268	4.39921	1.08647e-05	0.000340313
ENSMUSG00000021675	F2RL2	21.1434	1.97318	0.630632	3.1289	0.00175464	0.0184469
ENSMUSG00000107476	ZFP862-PS	145.601	1.95544	0.26485	7.3832	1.5453e-13	4.8677e-11
ENSMUSG00000090173	FBXW10	92.917	1.94908	0.491844	3.96279	7.40788e-05	0.00159786
ENSMUSG00000106634	GM43042	206.551	1.94757	0.460046	4.23343	2.30155e-05	0.000626824
ENSMUSG00000024164	C3	76.8202	1.94551	0.436656	4.45548	8.37076e-06	0.000270309
ENSMUSG00000041782	LAD1	109.211	1.9437	0.50834	3.82361	0.000131512	0.00253532
ENSMUSG00000026809	SPACA9	11.8461	1.93836	0.59709	3.24635	0.00116895	0.0137629
ENSMUSG00000047371	ZFP768	284.529	1.92105	0.309742	6.2021	5.5713e-10	6.74006e-08
ENSMUSG00000029581	FSCN1	191.731	1.92094	0.496864	3.86612	0.00011058	0.00221601
ENSMUSG00000000562	ADORA3	25.1509	1.92093	0.46375	4.14217	3.44029e-05	0.000862398
ENSMUSG00000015766	EPS8	25.9814	1.91633	0.550994	3.47795	0.000505267	0.0072345
ENSMUSG00000023990	TFEB	376.744	1.91579	0.318638	6.01242	1.82769e-09	1.94352e-07
ENSMUSG00000044465	FAM160A2	653.861	1.91406	0.244817	7.81833	5.35267e-15	2.51685e-12
ENSMUSG00000033863	KLF9	216.39	1.91307	0.303672	6.29979	2.98056e-10	3.94925e-08
ENSMUSG00000032656	2003-03-01	14.7178	1.91116	0.487114	3.92345	8.72916e-05	0.00182623
ENSMUSG00000032238	RORA	763.167	1.90391	0.478286	3.9807	6.8712e-05	0.00150742
ENSMUSG00000079293	CLEC7A	56.287	1.89306	0.417665	4.53248	5.8295e-06	0.000198215
ENSMUSG00000022912	PROS1	45.9391	1.89226	0.380562	4.97229	6.61662e-07	3.29957e-05
ENSMUSG00000015312	GADD45B	231.471	1.89223	0.320467	5.90458	3.53545e-09	3.45172e-07
ENSMUSG00000037124	TRIM58	47.8043	1.88521	0.654033	2.88244	0.00394604	0.0334994
ENSMUSG00000024986	HHEX	360.029	1.88272	0.596606	3.15573	0.00160099	0.0172442
ENSMUSG00000030103	BHLHE40	1171.3	1.87937	0.280895	6.69067	2.22154e-11	4.03136e-09
ENSMUSG00000031239	ITM2A	2916.94	1.87052	0.307547	6.08205	1.18655e-09	1.31188e-07
ENSMUSG00000002204	NAPSA	519.772	1.86998	0.448252	4.17173	3.023e-05	0.000782465
ENSMUSG00000042082	ARSB	329.043	1.86991	0.381713	4.89873	9.64566e-07	4.52344e-05
ENSMUSG00000036040	ADAMTSL2	244.997	1.86741	0.446969	4.17795	2.94153e-05	0.000766128
ENSMUSG00000051212	GPR183	153.84	1.86433	0.364321	5.11728	3.09978e-07	1.70795e-05
ENSMUSG00000020021	FGD6	264.219	1.86221	0.235651	7.90244	2.73507e-15	1.3837e-12
ENSMUSG00000027030	STK39	558.316	1.86083	0.325516	5.71655	1.08709e-08	9.30715e-07
ENSMUSG00000030142	CLEC4E	174.761	1.8541	0.668627	2.77299	0.0055543	0.0426929
ENSMUSG00000035355	KCNH4	33.169	1.85237	0.453527	4.08437	4.41965e-05	0.0010632
ENSMUSG00000105652	4930519L02RIK	201.831	1.84697	0.511535	3.61064	0.000305438	0.00492208
ENSMUSG00000001444	TBX21	43.457	1.84689	0.519439	3.55554	0.000377199	0.00576152
ENSMUSG00000042340	CTF1	20.5526	1.845	0.514545	3.58569	0.000336186	0.00529192
ENSMUSG00000033192	LPCAT2	63.1554	1.84422	0.369659	4.98898	6.06991e-07	3.08015e-05
ENSMUSG00000033705	STARD9	85.251	1.84227	0.376593	4.89194	9.98485e-07	4.61765e-05
ENSMUSG00000029919	HPGDS	22.0135	1.84112	0.508729	3.61907	0.000295667	0.00479239
ENSMUSG00000039899	FGL2	520.226	1.83975	0.596029	3.08668	0.00202406	0.0204805
ENSMUSG00000003378	GRIK5	289.923	1.83937	0.383535	4.79582	1.6201e-06	6.88235e-05
ENSMUSG00000076867	TRDV4	5.0812	1.83231	0.665744	2.75227	0.00591829	0.0447896
ENSMUSG00000009185	CCL8	6.59445	1.83046	0.591596	3.09411	0.00197408	0.0201327
ENSMUSG00000004709	CD244	93.9218	1.82345	0.574771	3.17248	0.00151145	0.0165339
ENSMUSG00000021596	MCTP1	32.1712	1.81858	0.567635	3.20378	0.00135636	0.0153835
ENSMUSG00000024659	ANXA1	90.9448	1.81719	0.354846	5.12106	3.03818e-07	1.68513e-05
ENSMUSG00000025855	PRKAR1B	16.4387	1.81397	0.47049	3.85549	0.000115496	0.00229003
ENSMUSG00000048376	F2R	2225.66	1.8096	0.589459	3.06993	0.00214107	0.0214043
ENSMUSG00000022132	CLDN10	30.9699	1.80544	0.595166	3.0335	0.00241735	0.0234229
ENSMUSG00000030325	KLRB1C	58.4835	1.80445	0.604641	2.98433	0.00284196	0.0265658
ENSMUSG00000019944	RHOBTB1	35.8734	1.79196	0.355019	5.04752	4.4759e-07	2.35726e-05
ENSMUSG00000078867	GM14418	11.8413	1.77898	0.647845	2.74599	0.00603288	0.0454713
ENSMUSG00000060470	ADGRG3	1526.57	1.77425	0.454092	3.90724	9.3355e-05	0.00192653
ENSMUSG00000022747	ST3GAL6	208.954	1.77343	0.44645	3.9723	7.11825e-05	0.0015494
ENSMUSG00000039782	CPEB2	101.522	1.77131	0.518998	3.41294	0.000642649	0.00882244
ENSMUSG00000055413	H2-Q5	729.553	1.76947	0.42892	4.12542	3.70061e-05	0.000920741
ENSMUSG00000030584	DPF1	12.7332	1.76308	0.527913	3.33971	0.00083866	0.0107703
ENSMUSG00000022309	ANGPT1	1739.33	1.76191	0.370712	4.75279	2.0063e-06	8.16956e-05
ENSMUSG00000052336	CX3CR1	195.305	1.76077	0.402953	4.36966	1.24438e-05	0.000380493
ENSMUSG00000099655	2310034G01RIK	27.7148	1.76068	0.415523	4.23725	2.26271e-05	0.000619278
ENSMUSG00000017724	ETV4	74.6474	1.76042	0.47962	3.67045	0.000242125	0.00411219
ENSMUSG00000032420	NT5E	955.112	1.75544	0.583693	3.00748	0.00263427	0.0250326
ENSMUSG00000030523	TRPM1	172.976	1.75281	0.627005	2.79553	0.00518148	0.0408427
ENSMUSG00000016386	MPPED2	16.6501	1.74665	0.524911	3.32752	0.00087623	0.0111244
ENSMUSG00000041202	PLA2G2D	18.3398	1.74594	0.526531	3.31594	0.000913368	0.0114911
ENSMUSG00000042106	FAM212A	410.67	1.74491	0.181143	9.63277	5.81417e-22	1.19997e-18
ENSMUSG00000033276	STK36	35.9785	1.74464	0.343892	5.07322	3.91149e-07	2.10635e-05
ENSMUSG00000033538	CASP4	353.103	1.74386	0.359488	4.85096	1.22862e-06	5.51394e-05
ENSMUSG00000028047	THBS3	15.0577	1.74262	0.483496	3.60421	0.000313102	0.00501924
ENSMUSG00000025511	TSPAN4	323.17	1.73402	0.270977	6.39913	1.56266e-10	2.22979e-08
ENSMUSG00000064125	PRR36	280.252	1.72955	0.347362	4.97908	6.38871e-07	3.21264e-05
ENSMUSG00000070407	HS3ST3B1	206.847	1.7288	0.497188	3.47716	0.000506756	0.00724961
ENSMUSG00000008206	CERS4	350.44	1.72367	0.45246	3.80956	0.000139214	0.00264111
ENSMUSG00000084772	GM15473	15.1572	1.71749	0.488278	3.51743	0.000435746	0.00642081
ENSMUSG00000026342	SLC35F5	126.432	1.71733	0.357495	4.80379	1.55693e-06	6.64783e-05
ENSMUSG00000020401	FAM71B	93.9183	1.7165	0.459428	3.73617	0.000186845	0.00335777
ENSMUSG00000089672	NA	32.6334	1.71288	0.591654	2.89507	0.00379079	0.0325719
ENSMUSG00000048720	TBC1D12	40.922	1.71136	0.360194	4.75121	2.02204e-06	8.21361e-05
ENSMUSG00000038515	GRTP1	70.6226	1.70545	0.458327	3.72103	0.000198414	0.00350903
ENSMUSG00000034799	UNC13A	73.2316	1.70456	0.309826	5.50166	3.76232e-08	2.74421e-06
ENSMUSG00000015812	GNRH1	4.84238	1.7029	0.60997	2.79177	0.00524205	0.0412117
ENSMUSG00000039959	HIP1	732.262	1.70279	0.37561	4.53339	5.80445e-06	0.000197766
ENSMUSG00000025870	ARL10	139.442	1.6895	0.242069	6.97941	2.96428e-12	6.68765e-10
ENSMUSG00000040502	2009-03-01	290.527	1.68278	0.278714	6.03765	1.56376e-09	1.68432e-07
ENSMUSG00000015709	ARNT2	67.1094	1.68165	0.563091	2.98646	0.00282226	0.026426
ENSMUSG00000049103	CCR2	304.923	1.67833	0.411799	4.0756	4.58957e-05	0.00109461
ENSMUSG00000006800	SULF2	32.4758	1.67572	0.472545	3.54616	0.000390891	0.00590515
ENSMUSG00000029648	FLT1	66.7409	1.67351	0.522386	3.20358	0.0013573	0.0153837
ENSMUSG00000028121	BCAR3	34.6758	1.67236	0.616901	2.71091	0.00670987	0.0493051
ENSMUSG00000032285	DNAJA4	30.2526	1.67207	0.508941	3.2854	0.00101838	0.0124812
ENSMUSG00000026939	TMEM141	16.1368	1.67176	0.518943	3.22147	0.00127537	0.0147249
ENSMUSG00000069114	ZBTB10	122.186	1.66915	0.4338	3.84774	0.000119213	0.00235813
ENSMUSG00000017692	RHBDL3	141.445	1.66403	0.478234	3.47954	0.000502284	0.00720415
ENSMUSG00000030409	DMPK	53.1309	1.66326	0.428491	3.88168	0.000103738	0.00210438
ENSMUSG00000020027	SOCS2	907	1.66265	0.387099	4.29517	1.74561e-05	0.000500589
ENSMUSG00000107096	GM43597	83.3454	1.66218	0.340466	4.88209	1.04968e-06	4.82765e-05
ENSMUSG00000036764	DNAJC12	262.246	1.66041	0.244077	6.80281	1.02595e-11	2.11459e-09
ENSMUSG00000031880	RRAD	611.794	1.65688	0.230467	7.18924	6.51538e-13	1.6996e-10
ENSMUSG00000059495	ARHGEF12	135.464	1.65685	0.301764	5.49056	4.0067e-08	2.8709e-06
ENSMUSG00000001507	ITGA3	78.3598	1.65208	0.38038	4.34323	1.40405e-05	0.000420836
ENSMUSG00000031530	DUSP4	1399.67	1.65205	0.319479	5.17109	2.32737e-07	1.35385e-05
ENSMUSG00000097075	D830044I16RIK	13.0361	1.64884	0.469731	3.51017	0.000447814	0.00656964
ENSMUSG00000090958	LRRC32	76.0504	1.64517	0.538169	3.05698	0.00223577	0.0221784
ENSMUSG00000033910	GUCY1A3	42.8764	1.63837	0.521028	3.1445	0.00166369	0.0177109
ENSMUSG00000068129	CST7	1623.3	1.6349	0.417027	3.92037	8.84126e-05	0.00184046
ENSMUSG00000067235	H2-Q10	104.734	1.63303	0.46224	3.53285	0.000411098	0.00612793
ENSMUSG00000097494	4933406C10RIK	75.0192	1.62718	0.437033	3.72325	0.000196674	0.00349305
ENSMUSG00000053580	TANC2	379.641	1.62165	0.397444	4.0802	4.4997e-05	0.0010778
ENSMUSG00000061048	CDH3	43.1663	1.61717	0.558554	2.89528	0.00378823	0.0325719
ENSMUSG00000061411	NOL4L	291.483	1.61631	0.194643	8.30398	1.00684e-16	7.0038e-14
ENSMUSG00000028362	TNFSF8	709.387	1.61521	0.442849	3.64731	0.000264997	0.004389
ENSMUSG00000036492	RNF39	22.2693	1.60981	0.575113	2.79912	0.00512426	0.0405064
ENSMUSG00000018500	ADORA2B	36.2053	1.60864	0.561367	2.86558	0.00416248	0.0346901
ENSMUSG00000089809	RASGEF1B	89.0499	1.60237	0.345726	4.6348	3.5729e-06	0.000131387
ENSMUSG00000054006	D630008O14RIK	15.8246	1.5984	0.480103	3.32928	0.000870698	0.0110964
ENSMUSG00000028459	CD72	503.227	1.59393	0.353851	4.50454	6.6517e-06	0.000221657
ENSMUSG00000059970	HSPA2	166.566	1.58806	0.221508	7.16928	7.53956e-13	1.90717e-10
ENSMUSG00000050132	SARM1	32.9692	1.58736	0.52998	2.99513	0.00274326	0.0258571
ENSMUSG00000052512	NAV2	331.831	1.58263	0.436728	3.62383	0.000290267	0.00471721
ENSMUSG00000038517	TBKBP1	153.774	1.57741	0.49341	3.19696	0.00138883	0.0155614
ENSMUSG00000022500	LITAF	496.365	1.57534	0.3619	4.35297	1.34306e-05	0.000406203
ENSMUSG00000030413	PGLYRP1	31.6467	1.57486	0.556169	2.83163	0.0046312	0.0374602
ENSMUSG00000022667	CD200R1	99.5501	1.57187	0.422235	3.72273	0.00019708	0.00349655
ENSMUSG00000029417	CXCL9	37.5303	1.56831	0.423512	3.70311	0.000212974	0.00368327
ENSMUSG00000024910	CTSW	1910.5	1.55806	0.366876	4.24685	2.16801e-05	0.000601245
ENSMUSG00000009418	NAV1	99.8846	1.55444	0.476046	3.26532	0.0010934	0.0131377
ENSMUSG00000055170	IFNG	46.0667	1.54423	0.511836	3.01705	0.00255251	0.024375
ENSMUSG00000034758	TLE6	65.1269	1.54353	0.418317	3.68987	0.000224373	0.00385778
ENSMUSG00000055912	TMEM150A	22.1949	1.53963	0.459791	3.34855	0.000812368	0.0105217
ENSMUSG00000047632	FGFBP3	70.8598	1.53891	0.254688	6.04235	1.51887e-09	1.64659e-07
ENSMUSG00000038550	CIART	229.09	1.5349	0.327685	4.68406	2.81245e-06	0.000107446
ENSMUSG00000005611	MRVI1	49.9902	1.53157	0.484565	3.1607	0.0015739	0.0170183
ENSMUSG00000046532	AR	676.454	1.52977	0.460684	3.32064	0.000898102	0.0113418
ENSMUSG00000022892	APP	80.7331	1.52117	0.320266	4.74972	2.03703e-06	8.25442e-05
ENSMUSG00000052572	DLG2	32.1225	1.52111	0.528151	2.88007	0.00397592	0.0336773
ENSMUSG00000026700	TNFSF4	39.3494	1.51964	0.43326	3.50745	0.000452421	0.00662609
ENSMUSG00000004508	GAB2	556.484	1.51426	0.277387	5.45901	4.78798e-08	3.38328e-06
ENSMUSG00000026062	SLC9A2	140.549	1.50658	0.32452	4.64249	3.44228e-06	0.000127708
ENSMUSG00000104950	4833413G10RIK	108.677	1.49688	0.319028	4.69201	2.70531e-06	0.000104067
ENSMUSG00000021375	KIF13A	566.06	1.49121	0.323614	4.60797	4.0661e-06	0.000146934
ENSMUSG00000032578	CISH	1236.12	1.48778	0.399109	3.72776	0.000193186	0.00344946
ENSMUSG00000020262	ADARB1	85.019	1.48476	0.47006	3.15866	0.00158495	0.0171156
ENSMUSG00000044231	NHLRC1	76.6361	1.48465	0.28735	5.1667	2.38264e-07	1.37641e-05
ENSMUSG00000073643	WDFY1	652.715	1.48377	0.446768	3.32113	0.000896544	0.0113409
ENSMUSG00000097418	MIR155HG	48.4163	1.48325	0.457809	3.23988	0.00119581	0.0140296
ENSMUSG00000019055	PLOD1	891.578	1.48192	0.252231	5.87524	4.22231e-09	4.05123e-07
ENSMUSG00000040732	ERG	924.398	1.48177	0.428386	3.45896	0.000542273	0.00763987
ENSMUSG00000097583	6430590A07RIK	19.4255	1.47938	0.515006	2.87254	0.00407187	0.0341926
ENSMUSG00000086841	2410006H16RIK	3782.52	1.47388	0.210594	6.99867	2.58398e-12	5.99161e-10
ENSMUSG00000024143	RHOQ	172.086	1.47318	0.378088	3.89639	9.76359e-05	0.00200004
ENSMUSG00000057329	BCL2	7654.25	1.47101	0.278419	5.28346	1.26767e-07	7.89073e-06
ENSMUSG00000019256	AHR	3314.58	1.46988	0.329619	4.45931	8.2223e-06	0.000267065
ENSMUSG00000042659	ARRDC4	479.612	1.46814	0.276866	5.30272	1.1409e-07	7.2149e-06
ENSMUSG00000030154	KLRB1F	68.7512	1.46385	0.362469	4.03855	5.37819e-05	0.00123506
ENSMUSG00000027776	IL12A	96.6601	1.45892	0.431542	3.38072	0.000722965	0.0096328
ENSMUSG00000015597	ZFP318	991.93	1.45881	0.258	5.6543	1.56479e-08	1.28691e-06
ENSMUSG00000032076	CADM1	61.5	1.45777	0.397569	3.6667	0.000245697	0.00416016
ENSMUSG00000028184	ADGRL2	137.618	1.45256	0.337668	4.30173	1.69468e-05	0.000487805
ENSMUSG00000044080	S100A1	67.8271	1.45023	0.376002	3.85698	0.000114798	0.00228162
ENSMUSG00000031824	6430548M08RIK	47.4027	1.44751	0.442441	3.27164	0.00106926	0.0129451
ENSMUSG00000038936	SCCPDH	127.858	1.44584	0.382478	3.78017	0.000156719	0.00292519
ENSMUSG00000046169	ADAMTS6	482.362	1.44287	0.356433	4.04807	5.16415e-05	0.0012075
ENSMUSG00000024427	SPRY4	259.507	1.44035	0.416261	3.4602	0.000539773	0.00761751
ENSMUSG00000037940	INPP4B	1454.28	1.43964	0.409728	3.51363	0.000442022	0.00649608
ENSMUSG00000030748	IL4RA	1850.25	1.43168	0.406579	3.52128	0.000429462	0.00634502
ENSMUSG00000021356	IRF4	704.186	1.43056	0.388942	3.67808	0.000235	0.00401979
ENSMUSG00000014453	BLK	1805.11	1.43008	0.295047	4.84695	1.25374e-06	5.58167e-05
ENSMUSG00000038304	CD160	1544.95	1.4264	0.400563	3.56098	0.000369477	0.00565391
ENSMUSG00000032997	CHPF	412.825	1.42272	0.272383	5.22322	1.75841e-07	1.04472e-05
ENSMUSG00000042510	AA986860	36.2744	1.42134	0.38224	3.71844	0.000200458	0.00353395
ENSMUSG00000027805	PFN2	95.0319	1.419	0.257622	5.50809	3.62756e-08	2.70367e-06
ENSMUSG00000048058	LDLRAD3	76.5626	1.41879	0.432404	3.28118	0.00103374	0.0126157
ENSMUSG00000007207	STX1A	99.3095	1.41861	0.473271	2.99745	0.00272244	0.025766
ENSMUSG00000050335	LGALS3	151.838	1.41859	0.470318	3.01624	0.00255932	0.024402
ENSMUSG00000035493	TGFBI	35.7782	1.418	0.44155	3.21142	0.00132082	0.0150725
ENSMUSG00000028161	PPP3CA	2184.77	1.41676	0.158742	8.92488	4.4618e-19	5.72998e-16
ENSMUSG00000057337	CHST3	51.7317	1.41601	0.457751	3.09341	0.00197869	0.0201551
ENSMUSG00000052155	ACVR2A	80.9952	1.41555	0.369501	3.83098	0.000127633	0.00248349
ENSMUSG00000044433	CAMSAP3	53.4535	1.40572	0.422369	3.32818	0.000874153	0.011115
ENSMUSG00000051615	RAP2A	584.282	1.40327	0.229731	6.1083	1.00695e-09	1.16743e-07
ENSMUSG00000068205	MACROD2	84.4371	1.40137	0.251943	5.56226	2.66297e-08	2.03937e-06
ENSMUSG00000100213	GM28151	30.0003	1.39798	0.485611	2.87881	0.00399183	0.0337915
ENSMUSG00000039873	NEURL2	85.5557	1.39792	0.318667	4.38676	1.15052e-05	0.000356364
ENSMUSG00000025931	PAQR8	397.729	1.39632	0.359388	3.88526	0.00010222	0.00207612
ENSMUSG00000030214	PLBD1	39.9396	1.39451	0.41207	3.38417	0.000713933	0.00955823
ENSMUSG00000025790	SLCO3A1	691.844	1.39429	0.232306	6.00195	1.94968e-09	2.03437e-07
ENSMUSG00000106847	PEG13	279.29	1.38644	0.414404	3.34563	0.000820954	0.0106
ENSMUSG00000048652	SAMD13	74.2535	1.38308	0.300761	4.5986	4.25333e-06	0.000152212
ENSMUSG00000036594	H2-AA	376.701	1.38305	0.371784	3.72003	0.000199202	0.00351924
ENSMUSG00000075602	LY6A	2507.26	1.38155	0.362014	3.8163	0.000135466	0.00258174
ENSMUSG00000022015	TNFSF11	1073.56	1.38055	0.230601	5.98678	2.14042e-09	2.21952e-07
ENSMUSG00000048911	RNF24	213.966	1.37636	0.236504	5.81963	5.89766e-09	5.40997e-07
ENSMUSG00000038594	CEP85L	114.329	1.37531	0.289294	4.75401	1.99418e-06	8.14004e-05
ENSMUSG00000071064	ZFP827	668.87	1.37051	0.325391	4.21189	2.53247e-05	0.000678644
ENSMUSG00000059540	TCEA2	115.452	1.36731	0.236978	5.76977	7.93802e-09	7.16353e-07
ENSMUSG00000060586	H2-EB1	277.288	1.36563	0.382663	3.56876	0.000358677	0.00555483
ENSMUSG00000053706	B430305J03RIK	50.8768	1.35936	0.35166	3.86556	0.000110834	0.00221601
ENSMUSG00000086350	B230369F24RIK	68.2202	1.35261	0.272036	4.97217	6.62088e-07	3.29957e-05
ENSMUSG00000098912	1500004A13RIK	116.206	1.35034	0.314409	4.29485	1.74809e-05	0.000500589
ENSMUSG00000031958	LDHD	170.34	1.34991	0.282777	4.77374	1.80832e-06	7.50991e-05
ENSMUSG00000027950	CHRNB2	282.07	1.34903	0.245467	5.49576	3.89024e-08	2.81158e-06
ENSMUSG00000041329	ATP1B2	76.7235	1.34756	0.418624	3.21902	0.00128629	0.0147795
ENSMUSG00000005824	TNFSF14	388.2	1.34355	0.328434	4.09076	4.29955e-05	0.0010403
ENSMUSG00000042759	APOBR	521.975	1.34072	0.357977	3.74526	0.00018021	0.00326787
ENSMUSG00000030156	CD69	2429.08	1.33963	0.307572	4.35549	1.32768e-05	0.000403746
ENSMUSG00000005087	CD44	199.262	1.33915	0.463701	2.88797	0.00387741	0.0330947
ENSMUSG00000001542	ELL2	122.73	1.33813	0.354917	3.77027	0.000163074	0.00301496
ENSMUSG00000028300	3110043O21RIK	107.858	1.3295	0.231192	5.75065	8.88996e-09	7.93678e-07
ENSMUSG00000078794	DACT3	31.687	1.32133	0.404317	3.26804	0.00108293	0.0130633
ENSMUSG00000027223	MAPK8IP1	220.437	1.3192	0.465445	2.83428	0.00459296	0.0372411
ENSMUSG00000032066	BCO2	19.8723	1.31901	0.461607	2.85743	0.00427093	0.0353511
ENSMUSG00000001942	SIAE	1375.43	1.31776	0.225987	5.83116	5.50429e-09	5.07702e-07
ENSMUSG00000030579	TYROBP	72.1677	1.31494	0.395404	3.32557	0.000882382	0.0111941
ENSMUSG00000101249	GM29216	49519.1	1.31055	0.162186	8.08056	6.44687e-16	3.71139e-13
ENSMUSG00000043415	OTUD1	444.873	1.30835	0.228384	5.72874	1.0118e-08	8.79788e-07
ENSMUSG00000024892	PCX	286.917	1.30706	0.323124	4.04506	5.23094e-05	0.00121761
ENSMUSG00000031755	BBS2	331.676	1.30365	0.222654	5.85506	4.76843e-09	4.49768e-07
ENSMUSG00000074826	GM10767	55.0243	1.29309	0.323846	3.99291	6.52682e-05	0.00144516
ENSMUSG00000024187	FAM234A	681.293	1.28951	0.250332	5.15119	2.58842e-07	1.47992e-05
ENSMUSG00000074570	CASS4	105.725	1.28805	0.281423	4.57692	4.71878e-06	0.000166203
ENSMUSG00000027087	ITGAV	1188.99	1.28727	0.261344	4.92558	8.41092e-07	4.0467e-05
ENSMUSG00000051098	MBLAC2	373.703	1.28569	0.210538	6.1067	1.01712e-09	1.17109e-07
ENSMUSG00000012889	PODNL1	807.028	1.28452	0.245873	5.22432	1.74794e-07	1.04221e-05
ENSMUSG00000031749	ST3GAL2	1379.84	1.28239	0.446319	2.87325	0.00406273	0.0341355
ENSMUSG00000041189	CHRNB1	151.273	1.282	0.253509	5.05701	4.25881e-07	2.25717e-05
ENSMUSG00000008496	POU2F2	155.755	1.28115	0.424117	3.02075	0.00252147	0.0241931
ENSMUSG00000030257	SRGAP3	302.261	1.27551	0.373748	3.41274	0.000643121	0.00882244
ENSMUSG00000030766	ARHGAP17	1371.95	1.27148	0.151919	8.36947	5.78792e-17	4.20127e-14
ENSMUSG00000041117	CCDC8	126.966	1.26487	0.38518	3.28384	0.00102402	0.0125337
ENSMUSG00000101493	2810405F17RIK	27.3936	1.25569	0.382657	3.2815	0.00103257	0.0126106
ENSMUSG00000018102	HIST1H2BC	681.057	1.25352	0.322995	3.88092	0.000104062	0.00210839
ENSMUSG00000000682	CD52	5689.07	1.25282	0.436227	2.87195	0.00407953	0.0342139
ENSMUSG00000070604	VSIG10L	113.815	1.25202	0.294557	4.25053	2.13269e-05	0.000596276
ENSMUSG00000066952	MYO1H	92.2042	1.24936	0.378632	3.29967	0.00096798	0.012042
ENSMUSG00000044468	FAM46C	108.632	1.24758	0.38184	3.26729	0.00108582	0.0130886
ENSMUSG00000061143	MAML3	1172.4	1.24686	0.258461	4.82419	1.40574e-06	6.1598e-05
ENSMUSG00000021701	PLK2	62.206	1.24638	0.349803	3.5631	0.0003665	0.00563776
ENSMUSG00000087523	GM12319	14.1801	1.24594	0.441485	2.82215	0.00477025	0.038325
ENSMUSG00000030806	STX1B	35.253	1.23843	0.436736	2.83565	0.00457327	0.037127
ENSMUSG00000025780	ITIH5	1113.06	1.23629	0.356837	3.46458	0.000531056	0.00751354
ENSMUSG00000039137	WHRN	549.758	1.2351	0.21305	5.79725	6.74105e-09	6.14982e-07
ENSMUSG00000031367	AP1S2	530.448	1.23161	0.263307	4.67746	2.90456e-06	0.000110595
ENSMUSG00000031995	ST14	559.683	1.23004	0.444629	2.76644	0.00566723	0.0433812
ENSMUSG00000105851	9130604C24RIK	65.2618	1.22386	0.292858	4.17902	2.92762e-05	0.000763696
ENSMUSG00000084796	MIR142HG	267.027	1.21637	0.315847	3.85112	0.000117578	0.00232855
ENSMUSG00000038007	ACER2	60.5528	1.2163	0.344119	3.53453	0.000408508	0.00609476
ENSMUSG00000086839	GM11973	27.7682	1.21392	0.428401	2.83361	0.00460254	0.0372465
ENSMUSG00000036478	BTG1	9292.11	1.21376	0.285577	4.2502	2.13581e-05	0.000596276
ENSMUSG00000051113	FAM71E1	55.4644	1.21363	0.316784	3.83108	0.00012758	0.00248349
ENSMUSG00000036053	FMNL2	57.9076	1.20952	0.422073	2.86567	0.00416127	0.0346901
ENSMUSG00000024696	LPXN	3519.65	1.20713	0.257647	4.68521	2.79674e-06	0.000107091
ENSMUSG00000107868	GM5112	34.9688	1.20524	0.317496	3.79608	0.000147004	0.00276513
ENSMUSG00000020604	ARSG	62.8157	1.20483	0.357108	3.37386	0.000741222	0.00983681
ENSMUSG00000030410	DMWD	976.141	1.20206	0.359606	3.34273	0.00082958	0.0106784
ENSMUSG00000050022	AMZ1	37.4339	1.19773	0.396664	3.0195	0.00253194	0.0242239
ENSMUSG00000025557	SLC15A1	1417.81	1.19637	0.397371	3.01071	0.00260635	0.0248221
ENSMUSG00000008845	CD163	116.444	1.19148	0.267574	4.4529	8.47175e-06	0.000273042
ENSMUSG00000074657	KIF5A	63.5368	1.18987	0.380088	3.13052	0.001745	0.0183687
ENSMUSG00000068463	B630019A10RIK	209.017	1.18899	0.353675	3.36181	0.000774348	0.0101474
ENSMUSG00000020424	GATSL3	271.431	1.18844	0.400987	2.96379	0.00303875	0.0278594
ENSMUSG00000036181	HIST1H1C	686.645	1.18698	0.2103	5.64422	1.6593e-08	1.34476e-06
ENSMUSG00000060550	H2-Q7	17388.5	1.18684	0.260495	4.55611	5.21098e-06	0.000180492
ENSMUSG00000044024	RELL2	188.453	1.18682	0.350647	3.38465	0.000712704	0.00955335
ENSMUSG00000052658	5830454E08RIK	81.2416	1.18544	0.271185	4.37134	1.23486e-05	0.000379228
ENSMUSG00000103103	4833445I07RIK	68.4846	1.18179	0.281005	4.2056	2.60395e-05	0.000695568
ENSMUSG00000029223	UCHL1	252.117	1.1752	0.367093	3.20137	0.00136777	0.015451
ENSMUSG00000041075	FZD7	252.4	1.17415	0.336304	3.49133	0.000480619	0.00696604
ENSMUSG00000024873	CNIH2	92.773	1.17125	0.418012	2.80194	0.00507958	0.0403176
ENSMUSG00000028381	UGCG	3876.91	1.16896	0.30561	3.82499	0.000130776	0.00252991
ENSMUSG00000024597	SLC12A2	480.358	1.16716	0.284897	4.09676	4.18972e-05	0.00101964
ENSMUSG00000043019	EDEM3	1987.36	1.16433	0.246485	4.72372	2.31569e-06	9.13958e-05
ENSMUSG00000028967	ERRFI1	208.521	1.16212	0.304336	3.81853	0.000134249	0.00256589
ENSMUSG00000075514	GM13375	33.208	1.15937	0.41997	2.76061	0.00576928	0.0438807
ENSMUSG00000014547	WDFY2	263.448	1.15878	0.226979	5.10524	3.30377e-07	1.80841e-05
ENSMUSG00000033578	TMEM35A	127.768	1.15842	0.335769	3.45005	0.000560491	0.00784946
ENSMUSG00000042129	RASSF4	389.578	1.15829	0.360412	3.21381	0.00130988	0.0149682
ENSMUSG00000025762	LARP1B	543.448	1.15773	0.171678	6.74361	1.54498e-11	2.96476e-09
ENSMUSG00000050195	SCD4	57.305	1.15441	0.388055	2.97487	0.00293112	0.0271711
ENSMUSG00000031565	FGFR1	432.057	1.15411	0.316093	3.65117	0.000261044	0.0043451
ENSMUSG00000002108	NR1H3	66.0248	1.15332	0.339117	3.40095	0.000671531	0.00912222
ENSMUSG00000037594	BC022687	105.351	1.15314	0.296489	3.88931	0.000100529	0.00205175
ENSMUSG00000023367	TMEM176A	1862.84	1.14899	0.159789	7.1907	6.44603e-13	1.6996e-10
ENSMUSG00000031996	APLP2	1444.21	1.14887	0.207627	5.53335	3.14168e-08	2.37332e-06
ENSMUSG00000026383	EPB41L5	176.549	1.14849	0.302659	3.79466	0.000147848	0.00277207
ENSMUSG00000033721	VAV3	1194.22	1.14345	0.225535	5.06994	3.97951e-07	2.12942e-05
ENSMUSG00000053964	LGALS4	80.4023	1.13903	0.315564	3.60949	0.000306798	0.00493448
ENSMUSG00000039328	RNF122	665.657	1.13752	0.348898	3.26032	0.00111288	0.0132996
ENSMUSG00000096094	A630095N17RIK	33.2347	1.13409	0.398022	2.84931	0.00438143	0.0359803
ENSMUSG00000021211	AKR1C12	779.856	1.13357	0.371112	3.05453	0.00225413	0.0222943
ENSMUSG00000038718	PBX3	20.9825	1.13265	0.37373	3.03066	0.00244021	0.0236307
ENSMUSG00000099632	2900093K20RIK	68.3663	1.13162	0.319173	3.54547	0.000391908	0.00590515
ENSMUSG00000047227	GM527	24.6462	1.12922	0.387784	2.91198	0.00359147	0.031424
ENSMUSG00000021725	PARP8	1828.66	1.12746	0.219741	5.13088	2.88394e-07	1.62113e-05
ENSMUSG00000056708	IER5	1059.57	1.12555	0.179356	6.27549	3.48535e-10	4.44182e-08
ENSMUSG00000063972	NR6A1	105.797	1.12323	0.25889	4.33863	1.43373e-05	0.000427431
ENSMUSG00000044197	GPR146	1568.56	1.12317	0.294148	3.81839	0.000134327	0.00256589
ENSMUSG00000034156	TSPOAP1	225.258	1.12019	0.347698	3.22175	0.00127411	0.0147249
ENSMUSG00000038351	SGSM2	648.507	1.11865	0.191764	5.83346	5.42882e-09	5.06336e-07
ENSMUSG00000027002	NCKAP1	407.405	1.11848	0.284299	3.93418	8.34825e-05	0.00175977
ENSMUSG00000020007	IL20RA	204.133	1.11845	0.244101	4.58189	4.60797e-06	0.000162987
ENSMUSG00000025058	5430427O19RIK	212.982	1.11753	0.272528	4.10059	4.12104e-05	0.00100881
ENSMUSG00000054027	NT5DC3	1007.98	1.11718	0.147988	7.54917	4.38033e-14	1.49244e-11
ENSMUSG00000031758	CDYL2	745.792	1.11695	0.237174	4.70941	2.48429e-06	9.6454e-05
ENSMUSG00000067931	ZFP948	85.8569	1.11475	0.364061	3.062	0.00219864	0.021875
ENSMUSG00000031155	PIM2	1110.16	1.11207	0.400321	2.77795	0.00547031	0.0423308
ENSMUSG00000043372	HEXIM2	292.231	1.11193	0.25246	4.40438	1.06089e-05	0.000334181
ENSMUSG00000073678	PGAP1	209.438	1.10992	0.374133	2.96666	0.00301053	0.0276766
ENSMUSG00000048807	SLC35E4	140.913	1.10849	0.374945	2.95642	0.00311235	0.0282926
ENSMUSG00000024030	ABCG1	3487.75	1.10599	0.240307	4.60241	4.17636e-06	0.000150592
ENSMUSG00000051590	MAP3K19	134.817	1.10509	0.260477	4.24256	2.20987e-05	0.000607805
ENSMUSG00000096056	GM21986	58.9808	1.1034	0.252206	4.37501	1.21425e-05	0.00037402
ENSMUSG00000034793	G6PC3	965.52	1.10166	0.17648	6.24241	4.30881e-10	5.36833e-08
ENSMUSG00000043618	EIF5AL3-PS	44.9035	1.09899	0.399161	2.75326	0.00590046	0.0446821
ENSMUSG00000035376	HACD2	545.215	1.09898	0.135273	8.12415	4.50491e-16	2.89267e-13
ENSMUSG00000022265	ANK	291.833	1.09755	0.30943	3.54702	0.000389619	0.00589193
ENSMUSG00000036019	TMTC2	210.445	1.09626	0.345538	3.17262	0.0015107	0.0165339
ENSMUSG00000017707	SERINC3	28970.1	1.09387	0.192009	5.69697	1.21954e-08	1.03352e-06
ENSMUSG00000098557	KCTD12	1195.09	1.09361	0.342627	3.19185	0.00141363	0.0157548
ENSMUSG00000025352	GDF11	507.663	1.09297	0.304686	3.58721	0.000334229	0.00527405
ENSMUSG00000025359	PMEL	23.3141	1.09235	0.348437	3.135	0.00171857	0.0181707
ENSMUSG00000058794	NFE2	2245.04	1.09209	0.389568	2.80335	0.00505749	0.040207
ENSMUSG00000039942	PTGER4	2891.05	1.09145	0.169036	6.45692	1.06858e-10	1.62182e-08
ENSMUSG00000004562	ARHGEF40	318.037	1.09102	0.344513	3.16685	0.00154101	0.0167713
ENSMUSG00000066175	2510046G10RIK	139.157	1.08906	0.291883	3.73115	0.000190611	0.00341809
ENSMUSG00000072437	NANOS1	277.834	1.08895	0.199596	5.45577	4.87616e-08	3.42049e-06
ENSMUSG00000012126	UBXN11	166.469	1.08871	0.221783	4.90892	9.15799e-07	4.34354e-05
ENSMUSG00000025597	KLHL4	574.23	1.08504	0.329633	3.29166	0.000995976	0.0122805
ENSMUSG00000037022	MMAA	184.433	1.08278	0.197373	5.48598	4.11193e-08	2.93371e-06
ENSMUSG00000074622	MAFB	115.257	1.07984	0.378564	2.85245	0.0043383	0.0356963
ENSMUSG00000048142	NAT8L	198.02	1.07885	0.377921	2.8547	0.00430773	0.0355076
ENSMUSG00000035095	FAM167A	2473.3	1.07794	0.286752	3.75912	0.000170514	0.00314556
ENSMUSG00000067219	NIPAL1	597.836	1.07751	0.290861	3.70455	0.000211768	0.00368278
ENSMUSG00000007617	HOMER1	436.227	1.07445	0.265985	4.03952	5.35596e-05	0.00123321
ENSMUSG00000041390	MDFIC	1135.11	1.07363	0.249516	4.30287	1.68601e-05	0.000486988
ENSMUSG00000045441	GPRIN3	1503.06	1.06719	0.355501	3.00194	0.00268264	0.0254406
ENSMUSG00000040997	ABHD4	1728.01	1.0643	0.215936	4.92878	8.27454e-07	3.99258e-05
ENSMUSG00000097509	B230322F03RIK	44.9672	1.06361	0.323322	3.28962	0.00100322	0.0123425
ENSMUSG00000085829	GM4285	48.8245	1.05908	0.264312	4.00694	6.15095e-05	0.00137839
ENSMUSG00000062861	ZFP28	201.8	1.05635	0.267709	3.94589	7.95058e-05	0.00169305
ENSMUSG00000025262	FAM120C	775.957	1.05495	0.210966	5.00058	5.7159e-07	2.91826e-05
ENSMUSG00000015377	DENND6B	281.497	1.05202	0.253128	4.15608	3.23753e-05	0.000827137
ENSMUSG00000027956	TMEM144	21.8432	1.05035	0.362917	2.89418	0.00380156	0.0326319
ENSMUSG00000035158	MITF	63.5866	1.04411	0.277953	3.75644	0.000172348	0.00317239
ENSMUSG00000046668	CXXC5	5704.81	1.04147	0.161738	6.43926	1.20054e-10	1.77371e-08
ENSMUSG00000060063	ALOX5AP	910.672	1.04041	0.325705	3.19434	0.00140153	0.0156617
ENSMUSG00000025193	CUTC	393.057	1.03904	0.182173	5.70362	1.17291e-08	9.99072e-07
ENSMUSG00000004565	PNPLA6	847.778	1.03892	0.181266	5.73148	9.95585e-09	8.70224e-07
ENSMUSG00000040111	GRAMD1B	2438.5	1.03856	0.284568	3.64959	0.000262662	0.00436557
ENSMUSG00000037759	PTGER2	52.8399	1.03775	0.326393	3.17943	0.00147564	0.0162506
ENSMUSG00000022508	BCL6	564.551	1.03549	0.292025	3.54591	0.000391266	0.00590515
ENSMUSG00000030522	MTMR10	312.632	1.03479	0.191417	5.40596	6.44622e-08	4.35707e-06
ENSMUSG00000048406	B330016D10RIK	131.186	1.03283	0.225492	4.58036	4.6418e-06	0.000163837
ENSMUSG00000086392	MCCC1OS	37.94	1.03211	0.345583	2.98658	0.0028212	0.026426
ENSMUSG00000103283	GM37276	46.5505	1.03166	0.322477	3.19916	0.00137829	0.0155146
ENSMUSG00000044641	PARD6B	132.09	1.02856	0.184701	5.56879	2.56512e-08	1.97349e-06
ENSMUSG00000002983	RELB	955.211	1.02797	0.240649	4.27167	1.94011e-05	0.000548986
ENSMUSG00000085767	GM13563	35.3184	1.0267	0.377105	2.72258	0.00647738	0.0481263
ENSMUSG00000027663	ZMAT3	407.558	1.02633	0.261485	3.92499	8.67348e-05	0.00182143
ENSMUSG00000110344	GM45716	232.664	1.02489	0.335212	3.05743	0.00223241	0.0221582
ENSMUSG00000027698	NCEH1	1315.54	1.02243	0.21546	4.74531	2.08186e-06	8.39533e-05
ENSMUSG00000034173	ZBED5	250.543	1.02134	0.272158	3.75274	0.00017491	0.00321153
ENSMUSG00000090031	4732440D04RIK	63.5799	1.01885	0.316625	3.21785	0.00129156	0.0148298
ENSMUSG00000002365	SNX9	535.153	1.01609	0.293796	3.45848	0.00054323	0.0076469
ENSMUSG00000031555	ADAM9	324.675	1.01569	0.26271	3.86622	0.000110537	0.00221601
ENSMUSG00000031217	EFNB1	206.04	1.01244	0.281244	3.59988	0.00031836	0.00509102
ENSMUSG00000046982	TSHZ1	1690.44	1.00845	0.14061	7.17192	7.39517e-13	1.89942e-10
ENSMUSG00000039934	GSAP	317.377	1.00795	0.290318	3.47188	0.00051683	0.00736847
ENSMUSG00000109398	GM3854	53.6862	1.00347	0.328717	3.05268	0.00226811	0.0223794
ENSMUSG00000044952	KCTD21	120.685	1.00237	0.232259	4.31575	1.59064e-05	0.00046671
ENSMUSG00000039556	PPP1R3F	73.3972	0.99979	0.330766	3.02265	0.0025057	0.0240972
ENSMUSG00000025017	PIK3AP1	142.081	0.998958	0.314426	3.17708	0.00148765	0.0163504
ENSMUSG00000024620	PDGFRB	8040.89	0.99666	0.240439	4.14517	3.39562e-05	0.000855051
ENSMUSG00000005951	SHPK	230.841	0.995084	0.200241	4.96944	6.71449e-07	3.31652e-05
ENSMUSG00000102059	GM20257	102.657	0.994832	0.290234	3.42769	0.000608732	0.00842685
ENSMUSG00000089875	ETOHD2	37.267	0.983955	0.311134	3.16248	0.00156432	0.0169366
ENSMUSG00000022637	CBLB	6207.32	0.983287	0.235029	4.18368	2.86827e-05	0.00075056
ENSMUSG00000026478	LAMC1	872.047	0.983245	0.209539	4.69242	2.69996e-06	0.000104067
ENSMUSG00000024754	TMEM2	155.682	0.982974	0.204416	4.8087	1.51915e-06	6.51986e-05
ENSMUSG00000041849	CARD6	1105.2	0.982317	0.35974	2.73063	0.00632136	0.0471349
ENSMUSG00000064267	HVCN1	1602.55	0.975432	0.346525	2.81489	0.00487935	0.0390137
ENSMUSG00000044813	SHB	107.65	0.974294	0.225798	4.31489	1.59679e-05	0.000467691
ENSMUSG00000032012	NECTIN1	101.883	0.974022	0.337923	2.88238	0.00394689	0.0334994
ENSMUSG00000029560	SNX8	108.806	0.972207	0.33213	2.92719	0.00342041	0.0303123
ENSMUSG00000051341	ZFP52	397.832	0.969102	0.324476	2.98667	0.00282037	0.026426
ENSMUSG00000002393	NR2F6	384.26	0.966018	0.262921	3.67418	0.000238612	0.00406908
ENSMUSG00000021687	SCAMP1	299.926	0.963321	0.281649	3.42028	0.000625556	0.00861687
ENSMUSG00000097121	D130020L05RIK	63.5326	0.962178	0.300608	3.20077	0.0013706	0.0154615
ENSMUSG00000060600	ENO3	467.057	0.961621	0.332938	2.88829	0.00387346	0.0330779
ENSMUSG00000020275	REL	1460.33	0.961457	0.24509	3.92287	8.75013e-05	0.00182833
ENSMUSG00000048012	ZFP473	96.5845	0.960711	0.295427	3.25194	0.00114619	0.0135618
ENSMUSG00000039910	CITED2	1068.1	0.960007	0.18599	5.16161	2.44831e-07	1.4056e-05
ENSMUSG00000039304	TNFSF10	1981.89	0.959999	0.279615	3.43329	0.000596305	0.0082823
ENSMUSG00000054945	GM9958	61.0249	0.958531	0.323821	2.96007	0.00307573	0.0280444
ENSMUSG00000025486	SIRT3	655.124	0.958186	0.228692	4.18985	2.79141e-05	0.000733899
ENSMUSG00000070738	DGKD	9162.07	0.95736	0.224039	4.27318	1.92705e-05	0.000546215
ENSMUSG00000089774	SLC5A3	729.284	0.957318	0.320751	2.98462	0.00283933	0.0265561
ENSMUSG00000107742	9530085L11RIK	52.4194	0.956037	0.324867	2.94286	0.00325199	0.029221
ENSMUSG00000097354	2310001H17RIK	395.409	0.954946	0.187449	5.09443	3.49796e-07	1.90845e-05
ENSMUSG00000038393	TXNIP	18013.2	0.954794	0.214095	4.45968	8.2084e-06	0.000267065
ENSMUSG00000048878	HEXIM1	3042.01	0.953627	0.125377	7.60606	2.82575e-14	1.00374e-11
ENSMUSG00000026944	ABCA2	7767.03	0.951512	0.199529	4.76878	1.85344e-06	7.65922e-05
ENSMUSG00000096917	2500002B13RIK	68.1746	0.949581	0.321145	2.95686	0.00310791	0.0282761
ENSMUSG00000036534	SLC38A7	813.968	0.949378	0.172834	5.49302	3.95127e-08	2.84338e-06
ENSMUSG00000034066	FARP2	139.379	0.945493	0.253665	3.72733	0.000193523	0.00345177
ENSMUSG00000067336	BMPR2	616.312	0.945053	0.324765	2.90996	0.00361477	0.03153
ENSMUSG00000087385	FRG2F1	101.603	0.944611	0.233859	4.03923	5.36274e-05	0.00123321
ENSMUSG00000024235	MAP3K8	170.139	0.94292	0.23302	4.04652	5.19836e-05	0.0012121
ENSMUSG00000070737	TMEM35B	256.508	0.942907	0.25133	3.75168	0.000175657	0.00321556
ENSMUSG00000096983	2010015M23RIK	47.4637	0.940825	0.304033	3.09448	0.00197159	0.0201196
ENSMUSG00000035578	IQCG	73.2835	0.939927	0.278113	3.37965	0.00072577	0.00965477
ENSMUSG00000028680	PLK3	470.076	0.939793	0.291186	3.22747	0.00124891	0.01453
ENSMUSG00000019732	CALR3	50.6176	0.938838	0.300248	3.12688	0.00176674	0.0185443
ENSMUSG00000046269	USP27X	85.6267	0.936172	0.278729	3.35872	0.000783038	0.0102291
ENSMUSG00000035901	DENND5A	264.286	0.933834	0.21514	4.34058	1.42105e-05	0.000424526
ENSMUSG00000090069	E430024P14RIK	51.0418	0.930852	0.326185	2.85376	0.00432056	0.0355679
ENSMUSG00000037949	ANO10	1067.95	0.928588	0.27602	3.3642	0.000767651	0.0101072
ENSMUSG00000078566	BNIP3	165.321	0.928101	0.265917	3.49019	0.000482671	0.0069889
ENSMUSG00000023915	TNFRSF21	1010.41	0.923826	0.276493	3.34122	0.000834104	0.0107201
ENSMUSG00000074398	GM15441	74.7755	0.922509	0.307555	2.99949	0.00270431	0.0256235
ENSMUSG00000034993	VAT1	4878.66	0.921055	0.188117	4.89617	9.77208e-07	4.54761e-05
ENSMUSG00000045282	TMEM86B	296.881	0.920204	0.228041	4.03525	5.45432e-05	0.00124569
ENSMUSG00000090035	GALNT4	466.586	0.915896	0.215724	4.24569	2.17924e-05	0.000603358
ENSMUSG00000054520	SH3BP2	1110.09	0.914681	0.294507	3.10581	0.0018976	0.0195558
ENSMUSG00000024958	GPR137	506.847	0.914606	0.216031	4.23367	2.29905e-05	0.000626824
ENSMUSG00000035473	GALM	472.962	0.913458	0.293519	3.11209	0.00185769	0.0192755
ENSMUSG00000031149	PRAF2	943.21	0.912761	0.274985	3.31931	0.000902412	0.011379
ENSMUSG00000028793	RNF19B	1784.05	0.90927	0.176968	5.13805	2.77597e-07	1.57101e-05
ENSMUSG00000100594	2810414N06RIK	58.3501	0.904498	0.260728	3.46912	0.000522165	0.0074144
ENSMUSG00000043154	PPP2R3A	297.035	0.904351	0.254498	3.55347	0.000380183	0.0057965
ENSMUSG00000004612	NKG7	6811	0.904296	0.303765	2.97696	0.00291124	0.0270974
ENSMUSG00000024074	CRIM1	1511.16	0.904266	0.301849	2.99576	0.00273764	0.0258366
ENSMUSG00000037692	AHDC1	2516.26	0.902109	0.246528	3.65926	0.000252943	0.00424837
ENSMUSG00000036295	LRRN3	214.201	0.90204	0.292025	3.08891	0.00200889	0.0203881
ENSMUSG00000029672	FAM3C	1127.75	0.901694	0.205538	4.38699	1.14932e-05	0.000356364
ENSMUSG00000073236	2500004C02RIK	124.012	0.897761	0.207655	4.32333	1.53688e-05	0.000454129
ENSMUSG00000039096	RSAD1	383.259	0.892903	0.270355	3.30271	0.000957551	0.011939
ENSMUSG00000037509	ARHGEF4	455.78	0.892721	0.266815	3.34585	0.000820313	0.0105999
ENSMUSG00000085795	ZFP703	1050.4	0.892626	0.244108	3.65668	0.000255504	0.00427847
ENSMUSG00000043923	CCDC84	405.096	0.891905	0.232306	3.83936	0.000123356	0.00242234
ENSMUSG00000022848	DIRC2	102.328	0.890886	0.32673	2.72667	0.00639763	0.0476398
ENSMUSG00000014496	ANKRD28	3344.81	0.890132	0.202751	4.39027	1.1321e-05	0.000352618
ENSMUSG00000049686	ORAI1	1178.14	0.886568	0.239391	3.70344	0.000212697	0.00368327
ENSMUSG00000031304	IL2RG	16591.3	0.886437	0.180876	4.90081	9.54442e-07	4.48857e-05
ENSMUSG00000010751	TNFRSF22	239.447	0.884897	0.226629	3.90461	9.43787e-05	0.00194525
ENSMUSG00000000811	TXNRD3	392.377	0.884399	0.326464	2.70902	0.00674823	0.0493611
ENSMUSG00000024403	ATP6V1G2	111.438	0.883837	0.287564	3.07354	0.00211538	0.0212237
ENSMUSG00000021003	GALC	429.393	0.882024	0.121039	7.28714	3.16612e-13	9.16423e-11
ENSMUSG00000037999	ARAP2	2535.21	0.881971	0.271698	3.24615	0.00116979	0.0137629
ENSMUSG00000030309	CAPRIN2	213.737	0.880907	0.187881	4.68865	2.75015e-06	0.000105549
ENSMUSG00000071847	APCDD1	244.908	0.880394	0.227837	3.86414	0.000111481	0.00222629
ENSMUSG00000101856	1700096K18RIK	132.458	0.880377	0.277914	3.16781	0.00153594	0.016727
ENSMUSG00000025245	LZTFL1	2359.21	0.876431	0.275186	3.18487	0.00144821	0.0160437
ENSMUSG00000056185	SNX32	138.796	0.876073	0.298889	2.9311	0.00337762	0.0300422
ENSMUSG00000013033	ADGRL1	2730.92	0.873543	0.166012	5.26192	1.42559e-07	8.78234e-06
ENSMUSG00000021908	GM6768	206.232	0.871345	0.322013	2.70593	0.00681125	0.0497218
ENSMUSG00000021123	RDH12	221.446	0.869278	0.269803	3.2219	0.00127346	0.0147249
ENSMUSG00000028690	MMACHC	614.682	0.868399	0.168246	5.16148	2.45002e-07	1.4056e-05
ENSMUSG00000019943	ATP2B1	1708.26	0.865842	0.20633	4.19639	2.71197e-05	0.000718673
ENSMUSG00000068854	HIST2H2BE	687.192	0.865544	0.245755	3.52198	0.000428336	0.00633398
ENSMUSG00000091811	INAFM1	283.774	0.862869	0.175412	4.9191	8.69445e-07	4.13544e-05
ENSMUSG00000063954	HIST2H2AA2	493.799	0.862312	0.287917	2.995	0.00274446	0.0258571
ENSMUSG00000034334	FAM151B	49.2418	0.861463	0.245951	3.50258	0.000460771	0.0067184
ENSMUSG00000106978	N4BP2OS	51.3946	0.861383	0.300881	2.86287	0.00419818	0.0348873
ENSMUSG00000087406	E130215H24RIK	88.3096	0.860378	0.293929	2.92716	0.00342068	0.0303123
ENSMUSG00000022951	RCAN1	354.569	0.858933	0.291413	2.94748	0.00320378	0.0288963
ENSMUSG00000022634	YAF2	615.382	0.858234	0.184738	4.64568	3.38954e-06	0.000126032
ENSMUSG00000049858	SUOX	1716.94	0.857034	0.224362	3.81987	0.000133524	0.00256228
ENSMUSG00000020593	LPIN1	1759.85	0.856323	0.211967	4.03989	5.34761e-05	0.00123313
ENSMUSG00000054708	ANKRD24	86.5763	0.852668	0.285174	2.98999	0.00278988	0.0262111
ENSMUSG00000047648	FBXO30	353.473	0.85027	0.306937	2.77018	0.0056026	0.0430048
ENSMUSG00000036622	ATP13A2	5158.71	0.849342	0.273924	3.10065	0.00193099	0.0198021
ENSMUSG00000047221	FAM185A	302.29	0.848338	0.204346	4.15149	3.3032e-05	0.000836828
ENSMUSG00000048644	CTXN1	318.331	0.845501	0.273011	3.09695	0.00195521	0.0200102
ENSMUSG00000044348	SLC25A53	555.966	0.844037	0.240151	3.51462	0.000440391	0.00648354
ENSMUSG00000099689	ZFP383	165.158	0.843885	0.259223	3.25544	0.00113215	0.0134694
ENSMUSG00000055866	PER2	339.371	0.843274	0.258945	3.25658	0.00112763	0.013447
ENSMUSG00000028188	SPATA1	76.5754	0.842964	0.27884	3.02311	0.00250188	0.0240972
ENSMUSG00000008305	TLE1	562.131	0.842811	0.281638	2.99253	0.00276674	0.0260377
ENSMUSG00000026663	ATF6	2094.95	0.842184	0.250847	3.35736	0.000786899	0.0102715
ENSMUSG00000059482	2610301B20RIK	739.483	0.841631	0.191172	4.40249	1.07014e-05	0.000335826
ENSMUSG00000026748	PLXDC2	2951.41	0.838569	0.182362	4.59839	4.25775e-06	0.000152212
ENSMUSG00000056749	NFIL3	89.5082	0.837153	0.253804	3.29842	0.000972289	0.0120808
ENSMUSG00000105509	C130013H08RIK	152.869	0.835779	0.188814	4.42647	9.57898e-06	0.000305193
ENSMUSG00000054484	TMEM62	270.352	0.834407	0.20332	4.1039	4.06239e-05	0.000997376
ENSMUSG00000048249	CREBRF	1357.76	0.834245	0.26561	3.14086	0.00168451	0.0179012
ENSMUSG00000038037	SOCS1	1658.94	0.830846	0.263539	3.15266	0.00161792	0.0173539
ENSMUSG00000042364	SNX18	1124.45	0.828746	0.123912	6.68818	2.25962e-11	4.05638e-09
ENSMUSG00000030452	NIPA2	927.37	0.827952	0.205963	4.01991	5.82212e-05	0.00132245
ENSMUSG00000039206	DAGLB	213.557	0.82642	0.240307	3.43902	0.000583827	0.00814285
ENSMUSG00000069920	B3GNT9	210.476	0.82471	0.207138	3.98145	6.84971e-05	0.00150468
ENSMUSG00000075033	NXPE3	1273.17	0.822886	0.186305	4.41688	1.00135e-05	0.000316775
ENSMUSG00000020097	SGPL1	2285.79	0.822767	0.180255	4.56445	5.00807e-06	0.000174916
ENSMUSG00000015202	CNKSR3	593.195	0.817898	0.259081	3.15691	0.00159448	0.0172074
ENSMUSG00000026655	FAM107B	12211.9	0.817309	0.181073	4.51369	6.37093e-06	0.000214009
ENSMUSG00000028641	P3H1	393.872	0.812519	0.217098	3.74265	0.000182093	0.00329722
ENSMUSG00000021690	JMY	1894.73	0.808697	0.246514	3.28053	0.00103612	0.0126264
ENSMUSG00000067199	FRAT1	487.921	0.80666	0.208917	3.86114	0.000112858	0.00224841
ENSMUSG00000029822	OSBPL3	1046.37	0.803343	0.273718	2.93492	0.00333629	0.0298017
ENSMUSG00000068250	AMN1	286.447	0.80286	0.263447	3.04752	0.0023074	0.0225936
ENSMUSG00000021371	MCUR1	1316.7	0.801069	0.1965	4.07669	4.56809e-05	0.00109105
ENSMUSG00000100975	GM28875	178.451	0.800829	0.230849	3.46907	0.000522272	0.0074144
ENSMUSG00000063889	CREM	323.199	0.794132	0.245633	3.233	0.00122496	0.0143212
ENSMUSG00000049090	ZADH2	1406.6	0.793943	0.134114	5.91993	3.2208e-09	3.18173e-07
ENSMUSG00000101013	A630072M18RIK	181.463	0.793905	0.277977	2.85601	0.00429005	0.0354568
ENSMUSG00000021240	ABCD4	290.341	0.792982	0.188571	4.20522	2.60832e-05	0.000695621
ENSMUSG00000000134	TFE3	1402.18	0.792269	0.202401	3.91436	9.06444e-05	0.0018795
ENSMUSG00000071076	JUND	4348.48	0.790415	0.219643	3.59864	0.000319888	0.00511055
ENSMUSG00000024642	TLE4	2154.88	0.78698	0.183434	4.29027	1.78459e-05	0.000510167
ENSMUSG00000035929	H2-Q4	7746.17	0.786803	0.205766	3.82378	0.000131419	0.00253532
ENSMUSG00000064043	TRERF1	1497.53	0.783176	0.204142	3.83642	0.000124841	0.00244055
ENSMUSG00000059316	SLC27A4	1158.28	0.782453	0.181884	4.30195	1.69305e-05	0.000487805
ENSMUSG00000060681	SLC9A6	879.698	0.779347	0.141623	5.50298	3.73417e-08	2.74421e-06
ENSMUSG00000014243	ZSWIM7	155.162	0.779202	0.241983	3.22007	0.00128158	0.0147558
ENSMUSG00000048234	RNF149	879.062	0.776446	0.179143	4.33423	1.46273e-05	0.000433753
ENSMUSG00000025314	PTPRJ	1479.22	0.775132	0.270275	2.86794	0.0041316	0.0345341
ENSMUSG00000045078	RNF216	1248.39	0.774652	0.172357	4.49446	6.9747e-06	0.000231496
ENSMUSG00000049488	TMEM67	149.767	0.772364	0.248264	3.11106	0.00186419	0.0193068
ENSMUSG00000047141	ZFP654	1298.56	0.770326	0.24496	3.14471	0.00166252	0.0177109
ENSMUSG00000046731	KCTD11	101.617	0.770059	0.277233	2.77766	0.00547515	0.042338
ENSMUSG00000057069	ERO1LB	526.62	0.769725	0.238867	3.2224	0.00127123	0.0147178
ENSMUSG00000037366	PAFAH2	286.521	0.769229	0.19528	3.9391	8.17874e-05	0.00173279
ENSMUSG00000033430	TERF2IP	1244.06	0.769156	0.131115	5.86626	4.45732e-09	4.25228e-07
ENSMUSG00000066640	FBXL18	969.573	0.766235	0.176148	4.34995	1.36171e-05	0.000410356
ENSMUSG00000030380	MZF1	64.0647	0.765124	0.268634	2.8482	0.00439668	0.0360523
ENSMUSG00000074151	NLRC5	4390.11	0.763964	0.275311	2.77492	0.00552161	0.0425255
ENSMUSG00000030096	SLC6A6	4903.82	0.763486	0.12926	5.90658	3.49283e-09	3.43016e-07
ENSMUSG00000093565	RAB26OS	153.744	0.762186	0.248306	3.06955	0.00214383	0.021419
ENSMUSG00000030704	RAB6A	2438.55	0.761639	0.155633	4.89382	9.88989e-07	4.58644e-05
ENSMUSG00000060002	CHPT1	280.252	0.759472	0.256293	2.9633	0.0030436	0.0278645
ENSMUSG00000047904	SSTR2	1464.11	0.757681	0.274706	2.75816	0.00581284	0.0441316
ENSMUSG00000037434	SLC30A1	430.083	0.754733	0.271146	2.78349	0.00537773	0.0418383
ENSMUSG00000039168	DAP	2901.07	0.753517	0.259259	2.90642	0.00365585	0.0317888
ENSMUSG00000062646	GANC	1298.71	0.751901	0.207203	3.62881	0.000284733	0.0046426
ENSMUSG00000021127	ZFP36L1	3926.97	0.751246	0.180766	4.15589	3.24018e-05	0.000827137
ENSMUSG00000037111	SETD7	5716.74	0.750005	0.178888	4.19261	2.75765e-05	0.000727315
ENSMUSG00000043290	ZFP784	235.209	0.74897	0.183554	4.08037	4.49631e-05	0.0010778
ENSMUSG00000037664	CDKN1C	47.6539	0.748809	0.275122	2.72174	0.006494	0.0481641
ENSMUSG00000026280	ATG4B	1942.09	0.748475	0.1463	5.11604	3.1201e-07	1.71349e-05
ENSMUSG00000066278	VPS37B	2519.45	0.748393	0.233654	3.203	0.00136005	0.015394
ENSMUSG00000032640	CHSY1	3895.04	0.746404	0.189652	3.93566	8.29696e-05	0.00175339
ENSMUSG00000037169	MYCN	528.503	0.745359	0.257667	2.89272	0.00381925	0.0327568
ENSMUSG00000030681	MVP	1212.87	0.744986	0.165316	4.50643	6.59274e-06	0.000220871
ENSMUSG00000057132	RPGRIP1	406.803	0.744816	0.268201	2.77708	0.00548495	0.0423745
ENSMUSG00000026821	RALGDS	901.894	0.744494	0.166009	4.48466	7.303e-06	0.000241433
ENSMUSG00000027806	TSC22D2	970.812	0.743706	0.197927	3.75747	0.00017164	0.00316283
ENSMUSG00000008855	HDAC5	1241.48	0.742568	0.22283	3.33245	0.000860863	0.0110047
ENSMUSG00000044447	DOCK5	451.083	0.740157	0.235131	3.14785	0.00164479	0.0175911
ENSMUSG00000056234	NCOA4	7746.61	0.739579	0.112622	6.56693	5.13641e-11	8.68972e-09
ENSMUSG00000035513	NTNG2	539.271	0.7353	0.243476	3.02001	0.00252765	0.0242017
ENSMUSG00000066647	GM5113	234.262	0.735041	0.19667	3.73743	0.000185913	0.00334824
ENSMUSG00000034064	POGLUT1	1322.05	0.734753	0.0947773	7.75241	9.01637e-15	3.76321e-12
ENSMUSG00000009291	PTTG1IP	2444.72	0.732915	0.15381	4.76507	1.88787e-06	7.76304e-05
ENSMUSG00000074305	PEAK1	2330.8	0.729196	0.226413	3.22065	0.00127902	0.0147365
ENSMUSG00000027007	SSFA2	961.045	0.729067	0.180247	4.04481	5.23654e-05	0.00121761
ENSMUSG00000004263	ATN1	2336.61	0.72873	0.254105	2.86783	0.00413292	0.0345341
ENSMUSG00000021892	SH3BP5	1436.54	0.728546	0.216621	3.36323	0.000770364	0.010127
ENSMUSG00000030275	ETNK1	9585.05	0.726945	0.190808	3.80983	0.000139062	0.00264111
ENSMUSG00000041272	TOX	8852.71	0.72665	0.245036	2.96549	0.00302205	0.0277386
ENSMUSG00000032932	HSPA13	1098.57	0.72549	0.258225	2.80952	0.00496153	0.0395572
ENSMUSG00000090946	CCDC71L	858.135	0.720106	0.175819	4.09572	4.20862e-05	0.00102126
ENSMUSG00000061232	H2-K1	43952.9	0.719747	0.21282	3.38196	0.000719717	0.00962023
ENSMUSG00000050043	TMX2	2239.64	0.719648	0.098822	7.28227	3.28251e-13	9.2884e-11
ENSMUSG00000043635	ADAMTS3	188.202	0.718495	0.228323	3.14683	0.00165049	0.0176295
ENSMUSG00000034171	FAAH	1637.86	0.718277	0.235801	3.04611	0.00231823	0.0226588
ENSMUSG00000026627	TMEM206	1040.13	0.717171	0.102018	7.02984	2.06773e-12	4.99571e-10
ENSMUSG00000038650	RNH1	893.799	0.716569	0.2243	3.1947	0.00139977	0.0156525
ENSMUSG00000031751	AMFR	3825.28	0.716066	0.147403	4.85789	1.18646e-06	5.35349e-05
ENSMUSG00000024349	TMEM173	3316.5	0.713439	0.262525	2.7176	0.00657566	0.0486781
ENSMUSG00000039086	SS18L1	282.163	0.709867	0.21846	3.24942	0.0011564	0.0136632
ENSMUSG00000050394	ARMCX6	396.954	0.708022	0.203324	3.48224	0.000497233	0.00716248
ENSMUSG00000020570	SYPL	2997.95	0.707258	0.208534	3.39157	0.000694946	0.00935655
ENSMUSG00000038121	FAM210A	1537.17	0.70696	0.188493	3.75059	0.000176421	0.00321899
ENSMUSG00000032652	CREBL2	277.283	0.706077	0.25409	2.77884	0.00545529	0.0422627
ENSMUSG00000031938	4931406C07RIK	501.761	0.705703	0.162796	4.3349	1.45828e-05	0.000433202
ENSMUSG00000003581	RNF215	450.275	0.705032	0.219852	3.20685	0.00134198	0.0152722
ENSMUSG00000035847	IDS	794.825	0.704864	0.207027	3.40469	0.00066239	0.00904219
ENSMUSG00000050075	GPR171	1794.25	0.704138	0.194467	3.62086	0.000293627	0.00476394
ENSMUSG00000005034	PRKACB	8737.42	0.702681	0.189097	3.71599	0.000202413	0.00355849
ENSMUSG00000044991	1110034G24RIK	242.401	0.70195	0.250574	2.80137	0.00508859	0.040339
ENSMUSG00000038175	MYLIP	1195.29	0.700391	0.252492	2.77391	0.00553864	0.0426118
ENSMUSG00000037697	DDHD1	899.601	0.700144	0.149836	4.67273	2.97228e-06	0.000112778
ENSMUSG00000039202	ABHD2	8602.17	0.70011	0.233679	2.99603	0.00273518	0.0258366
ENSMUSG00000033126	YBEY	319.863	0.699067	0.143572	4.86909	1.12111e-06	5.12792e-05
ENSMUSG00000051335	GFOD1	930.789	0.696814	0.207349	3.36058	0.000777785	0.0101685
ENSMUSG00000074578	ZFAS1	2328.3	0.695437	0.189593	3.66805	0.000244404	0.00414247
ENSMUSG00000043881	KBTBD7	600.205	0.694923	0.200088	3.47309	0.000514511	0.00734795
ENSMUSG00000020777	ACOX1	2027.64	0.69182	0.153184	4.51627	6.2938e-06	0.000211845
ENSMUSG00000037703	LZTS3	116.564	0.691298	0.246141	2.80854	0.00497666	0.0396589
ENSMUSG00000014177	TVP23B	668.383	0.690145	0.166584	4.14292	3.42906e-05	0.000860874
ENSMUSG00000022358	FBXO32	753.413	0.689575	0.226777	3.04076	0.00235981	0.0229738
ENSMUSG00000108435	GM45051	215.235	0.687123	0.241587	2.84421	0.00445216	0.0364
ENSMUSG00000020485	SUPT4A	3094.75	0.685726	0.185793	3.69081	0.000223538	0.00384739
ENSMUSG00000004317	CLCN5	867.985	0.685294	0.246078	2.78486	0.00535504	0.0417267
ENSMUSG00000040151	HS2ST1	943.317	0.684524	0.11545	5.92916	3.04484e-09	3.02581e-07
ENSMUSG00000035834	POLR3G	413.084	0.682181	0.247897	2.75188	0.00592549	0.0448086
ENSMUSG00000045975	C2CD2	678.26	0.680963	0.123821	5.49958	3.80694e-08	2.76334e-06
ENSMUSG00000019986	AHI1	1119.12	0.680772	0.130091	5.23304	1.66746e-07	1.01066e-05
ENSMUSG00000025225	NFKB2	3106.12	0.678868	0.186584	3.6384	0.000274334	0.00451193
ENSMUSG00000098702	1500015A07RIK	230.292	0.677564	0.159657	4.24386	2.19706e-05	0.000606138
ENSMUSG00000025558	DOCK9	917.452	0.677453	0.220771	3.06857	0.00215084	0.0214762
ENSMUSG00000060244	ALYREF2	257.194	0.677329	0.206478	3.2804	0.00103661	0.0126264
ENSMUSG00000023044	CSAD	659.059	0.676443	0.159405	4.24354	2.20018e-05	0.000606138
ENSMUSG00000106928	GM43860	97.5245	0.675103	0.247945	2.7228	0.00647317	0.0481165
ENSMUSG00000021226	ACOT2	542.777	0.673653	0.138621	4.85966	1.17586e-06	5.33453e-05
ENSMUSG00000034800	ZFP661	168.75	0.673381	0.226009	2.97944	0.00288771	0.0269181
ENSMUSG00000002732	FKBP7	63.8341	0.672436	0.236537	2.84283	0.00447145	0.0364862
ENSMUSG00000024425	NDFIP1	3330.35	0.671271	0.212712	3.15577	0.00160076	0.0172442
ENSMUSG00000055128	CGRRF1	175.966	0.670814	0.235669	2.84642	0.00442133	0.0362011
ENSMUSG00000097656	GM26712	99.6276	0.669555	0.223533	2.99533	0.0027415	0.0258571
ENSMUSG00000051510	MAFG	1107.64	0.669327	0.160714	4.16472	3.11737e-05	0.000803155
ENSMUSG00000038085	CNBD2	162.988	0.667858	0.199026	3.35563	0.000791848	0.01032
ENSMUSG00000028496	MLLT3	2973.87	0.66641	0.145928	4.56671	4.95432e-06	0.000173401
ENSMUSG00000040811	EML2	807.627	0.666046	0.215418	3.09188	0.00198893	0.0202168
ENSMUSG00000003123	LIPE	594.4	0.665799	0.197596	3.3695	0.000753034	0.00993046
ENSMUSG00000026489	COQ8A	660.636	0.665526	0.209804	3.17213	0.00151326	0.0165339
ENSMUSG00000096188	CMTM4	510.372	0.664815	0.167685	3.96465	7.35028e-05	0.00158749
ENSMUSG00000002996	HBP1	2677.82	0.664559	0.180543	3.6809	0.000232414	0.00397964
ENSMUSG00000022244	AMACR	144.751	0.662254	0.212425	3.11758	0.0018234	0.0190023
ENSMUSG00000003380	RABAC1	2290.88	0.661847	0.213385	3.10166	0.00192439	0.0197702
ENSMUSG00000057706	MEX3B	1827.94	0.660635	0.217546	3.03676	0.00239139	0.0232388
ENSMUSG00000042111	CCDC115	1352.64	0.657168	0.188181	3.49222	0.000479029	0.00695425
ENSMUSG00000037395	RCOR3	277.669	0.657145	0.205329	3.20045	0.00137214	0.0154678
ENSMUSG00000032846	ZSWIM6	843.931	0.656141	0.2378	2.75922	0.00579399	0.0440286
ENSMUSG00000064105	CNNM2	251.125	0.655044	0.194331	3.37076	0.000749605	0.00990868
ENSMUSG00000030203	DUSP16	594.594	0.654436	0.221201	2.95856	0.00309081	0.0281665
ENSMUSG00000041658	RRAGB	428.818	0.652648	0.152945	4.2672	1.97939e-05	0.000558208
ENSMUSG00000031398	PLXNA3	467.92	0.652248	0.236318	2.76004	0.0057794	0.0439377
ENSMUSG00000032000	BIRC3	1082.71	0.65116	0.187218	3.47808	0.000505019	0.0072345
ENSMUSG00000030727	RABEP2	1064.49	0.648902	0.200616	3.23456	0.00121832	0.0142535
ENSMUSG00000030811	FBXL19	2196.51	0.648763	0.166861	3.88803	0.00010106	0.0020577
ENSMUSG00000045867	CRADD	292.336	0.647108	0.170242	3.8011	0.000144055	0.00272367
ENSMUSG00000036155	MGAT5	6573.4	0.646962	0.190242	3.40073	0.000672054	0.00912222
ENSMUSG00000042742	BMT2	622.938	0.645882	0.23251	2.77787	0.00547169	0.0423308
ENSMUSG00000059866	TNIP2	436.234	0.643188	0.179091	3.59139	0.000328914	0.00520989
ENSMUSG00000021982	CDADC1	574.273	0.642894	0.173567	3.70401	0.000212219	0.00368295
ENSMUSG00000033773	RPAP2	761.892	0.641823	0.140717	4.56109	5.08882e-06	0.000177322
ENSMUSG00000059588	CALCRL	1761.72	0.641555	0.219711	2.92	0.00350037	0.0308546
ENSMUSG00000024799	TM7SF2	510.876	0.640355	0.192123	3.33304	0.000859014	0.0109895
ENSMUSG00000022957	ITSN1	114.712	0.638531	0.2171	2.94118	0.00326961	0.0293158
ENSMUSG00000050174	NUDT6	323.281	0.636499	0.171728	3.70643	0.000210199	0.0036593
ENSMUSG00000019920	LIMS1	3997.34	0.636326	0.196481	3.23861	0.00120115	0.0140725
ENSMUSG00000036052	DNAJB5	407.104	0.635201	0.229744	2.76483	0.00569533	0.0434966
ENSMUSG00000104960	SNHG8	1234.5	0.630259	0.202925	3.10587	0.00189717	0.0195558
ENSMUSG00000021285	PPP1R13B	3428.36	0.630077	0.194383	3.24142	0.00118938	0.0139836
ENSMUSG00000033769	EXOC6B	1070.27	0.630007	0.19355	3.25501	0.00113388	0.0134734
ENSMUSG00000045176	BORCS6	801.578	0.629114	0.203239	3.09544	0.00196521	0.0200759
ENSMUSG00000043162	PYURF	374.054	0.626437	0.162228	3.86146	0.00011271	0.00224814
ENSMUSG00000031146	PLP2	2216.52	0.624765	0.16069	3.88802	0.000101067	0.0020577
ENSMUSG00000004319	CLCN3	2082.99	0.624131	0.201539	3.09682	0.00195607	0.0200102
ENSMUSG00000057667	BLOC1S3	534.881	0.624012	0.177944	3.50679	0.000453551	0.00663631
ENSMUSG00000073411	H2-D1	39066.5	0.620407	0.216027	2.87189	0.00408026	0.0342139
ENSMUSG00000099681	1700052K11RIK	503.341	0.61957	0.195898	3.16271	0.00156307	0.0169341
ENSMUSG00000044857	LEMD2	1534.73	0.618407	0.20847	2.96641	0.00301302	0.0276843
ENSMUSG00000034430	ZXDC	1481.97	0.617507	0.153805	4.01487	5.94781e-05	0.00134187
ENSMUSG00000036208	NEPRO	578.112	0.612484	0.133494	4.58812	4.47255e-06	0.000159209
ENSMUSG00000037890	WDR19	385.384	0.60969	0.217909	2.79791	0.00514344	0.0406388
ENSMUSG00000097048	1600020E01RIK	385.23	0.608765	0.162547	3.74516	0.000180276	0.00326787
ENSMUSG00000039634	ZFP189	377.65	0.60855	0.224795	2.70713	0.00678667	0.0495858
ENSMUSG00000003154	FOXJ2	1405.23	0.607686	0.218333	2.7833	0.00538087	0.0418415
ENSMUSG00000038170	PDE4DIP	1150.45	0.606504	0.144841	4.18739	2.82186e-05	0.000740739
ENSMUSG00000006010	BC003331	617.578	0.606001	0.209906	2.88701	0.0038892	0.0331785
ENSMUSG00000003316	GLG1	5886.94	0.605219	0.128198	4.72096	2.34728e-06	9.21294e-05
ENSMUSG00000076431	SOX4	19351.9	0.603973	0.11162	5.41097	6.26836e-08	4.25408e-06
ENSMUSG00000051705	SENP8	275.266	0.603252	0.209199	2.88362	0.00393133	0.0334523
ENSMUSG00000074221	ZFP568	687.416	0.60062	0.196128	3.06239	0.00219577	0.0218725
ENSMUSG00000034126	POMT2	725.572	0.599231	0.161124	3.71907	0.000199959	0.00352888
ENSMUSG00000050855	ZFP940	466.788	0.598644	0.125784	4.75931	1.94253e-06	7.94866e-05
ENSMUSG00000037405	ICAM1	1100.85	0.595164	0.186061	3.19876	0.00138019	0.0155146
ENSMUSG00000029461	FAM168A	2635.21	0.594921	0.173479	3.42935	0.00060503	0.00838255
ENSMUSG00000029810	TMEM176B	3115.22	0.59364	0.202855	2.92643	0.00342877	0.0303678
ENSMUSG00000007659	BCL2L1	1327.41	0.592734	0.213523	2.77597	0.00550379	0.0424611
ENSMUSG00000085227	6330418K02RIK	96.257	0.592138	0.204597	2.89417	0.00380168	0.0326319
ENSMUSG00000021431	SNRNP48	771.736	0.591888	0.175619	3.37029	0.00075088	0.00991768
ENSMUSG00000087590	EPB41L4AOS	495.008	0.591479	0.200711	2.94692	0.00320953	0.0289325
ENSMUSG00000034121	MKS1	253.289	0.591406	0.158762	3.72512	0.000195222	0.00347095
ENSMUSG00000044617	ZBTB39	818.629	0.590965	0.154236	3.83157	0.00012733	0.00248338
ENSMUSG00000041483	ZFP281	1883.85	0.589302	0.178856	3.29484	0.000984784	0.0121875
ENSMUSG00000027784	PPM1L	1405.99	0.588458	0.186284	3.15893	0.00158351	0.0171111
ENSMUSG00000033379	ATP6V0B	1506.11	0.588211	0.188498	3.12052	0.00180534	0.018873
ENSMUSG00000020015	CDK17	3042.7	0.588134	0.187848	3.1309	0.00174273	0.0183564
ENSMUSG00000038302	LACE1	282.999	0.587952	0.175634	3.34761	0.000815123	0.010541
ENSMUSG00000022280	RNF19A	2403.94	0.586357	0.208165	2.81679	0.00485056	0.0388393
ENSMUSG00000038497	TMCO3	578.017	0.585228	0.15508	3.77371	0.00016084	0.00299022
ENSMUSG00000026576	ATP1B1	1788.3	0.584978	0.179656	3.25611	0.0011295	0.0134597
ENSMUSG00000022377	ASAP1	1730.97	0.584539	0.171716	3.40409	0.000663844	0.00904724
ENSMUSG00000029275	GFI1	3168.8	0.582862	0.164306	3.54741	0.000389032	0.0058911
ENSMUSG00000050240	HIC2	605.391	0.580651	0.117514	4.94113	7.76726e-07	3.76961e-05
ENSMUSG00000046841	CKAP4	691.656	0.580345	0.209946	2.76425	0.00570533	0.0435331
ENSMUSG00000031987	EGLN1	3363.44	0.579445	0.139376	4.15741	3.21872e-05	0.000824179
ENSMUSG00000031563	WWC2	362.926	0.57799	0.186525	3.09873	0.0019435	0.0199182
ENSMUSG00000035992	FNIP1	909.223	0.57465	0.196583	2.92319	0.00346462	0.0306203
ENSMUSG00000025188	HPS1	1550.28	0.574214	0.168912	3.39948	0.000675142	0.00914152
ENSMUSG00000039485	TSPYL4	1282.65	0.573746	0.135864	4.22294	2.41135e-05	0.000650363
ENSMUSG00000032633	FLCN	2050.29	0.573414	0.123406	4.64657	3.37503e-06	0.000125773
ENSMUSG00000006019	DHX34	2211.78	0.573317	0.178974	3.20336	0.00135835	0.0153851
ENSMUSG00000047603	ZFP235	350.592	0.572147	0.137722	4.15435	3.26208e-05	0.000830519
ENSMUSG00000020668	KIF3C	1362.37	0.571601	0.164	3.48537	0.000491454	0.0070976
ENSMUSG00000039530	TUSC3	1390.06	0.569618	0.178806	3.18567	0.00144419	0.0160183
ENSMUSG00000030157	CLEC2D	4187.55	0.569344	0.203689	2.79516	0.00518738	0.0408484
ENSMUSG00000026158	OGFRL1	991.12	0.569171	0.201085	2.83049	0.00464762	0.0375567
ENSMUSG00000023021	CERS5	1445.39	0.5686	0.15585	3.64839	0.000263892	0.00437504
ENSMUSG00000079184	MPHOSPH8	1294.1	0.568467	0.18209	3.1219	0.00179689	0.0187964
ENSMUSG00000033906	ZDHHC15	825.035	0.567847	0.203163	2.79503	0.00518954	0.0408484
ENSMUSG00000002781	TMEM143	443.515	0.567695	0.177363	3.20076	0.00137065	0.0154615
ENSMUSG00000019087	ATP6AP1	4208.38	0.566135	0.151314	3.74146	0.000182951	0.00330917
ENSMUSG00000022742	CPOX	849.543	0.564032	0.162031	3.48102	0.000499512	0.00717672
ENSMUSG00000027134	LPCAT4	885.792	0.563556	0.195804	2.87817	0.00399993	0.0337915
ENSMUSG00000029016	CLCN6	739.892	0.562539	0.160507	3.50476	0.000457024	0.00667543
ENSMUSG00000036894	RAP2B	1537.16	0.560464	0.175573	3.1922	0.00141191	0.0157548
ENSMUSG00000024083	PJA2	1811.94	0.560296	0.14942	3.74982	0.000176963	0.00322533
ENSMUSG00000041040	FAM117B	1876.99	0.558183	0.18612	2.99905	0.00270826	0.0256463
ENSMUSG00000027086	FASTKD1	613.508	0.557654	0.189409	2.94418	0.00323815	0.0291276
ENSMUSG00000036533	CDC42EP3	1439.04	0.557352	0.150086	3.71354	0.000204377	0.0035841
ENSMUSG00000047777	PHF13	855.582	0.55588	0.149103	3.72815	0.000192889	0.00344853
ENSMUSG00000029684	WASL	685.87	0.551028	0.191695	2.87451	0.00404661	0.0340343
ENSMUSG00000027422	RRBP1	2951.3	0.550328	0.153334	3.58909	0.000331832	0.00524614
ENSMUSG00000054723	VMAC	1195.17	0.549677	0.20192	2.72225	0.00648396	0.0481538
ENSMUSG00000076749	TCRG-C1	29459.1	0.545071	0.174812	3.11804	0.00182056	0.0189846
ENSMUSG00000015023	DDX19A	5676.49	0.543348	0.146311	3.71364	0.000204301	0.0035841
ENSMUSG00000025857	DNAAF5	1403.57	0.540594	0.18442	2.93132	0.00337525	0.0300372
ENSMUSG00000001630	STK38L	309.384	0.539973	0.160153	3.37161	0.000747314	0.00990191
ENSMUSG00000078317	F8A	527.547	0.539472	0.189994	2.83942	0.00451953	0.0368425
ENSMUSG00000031969	ACAD8	547.133	0.539226	0.122026	4.41896	9.9176e-06	0.00031478
ENSMUSG00000004394	TMED4	1605.25	0.538281	0.111931	4.80903	1.51667e-06	6.51986e-05
ENSMUSG00000020585	LAPTM4A	4051.1	0.5379	0.117942	4.56071	5.0982e-06	0.000177322
ENSMUSG00000021930	SPRYD7	286.188	0.536335	0.176263	3.04281	0.0023438	0.0228561
ENSMUSG00000021886	GPR65	2214.14	0.535966	0.190471	2.8139	0.00489438	0.0390592
ENSMUSG00000020458	RTN4	3652.09	0.535545	0.131793	4.06353	4.83354e-05	0.00114139
ENSMUSG00000023143	NAGPA	1010.58	0.53052	0.159361	3.32905	0.000871418	0.0110964
ENSMUSG00000025544	TM9SF2	4996.72	0.530131	0.191362	2.77031	0.00560037	0.0430048
ENSMUSG00000031605	KLHL2	525.207	0.529238	0.136747	3.87019	0.000108752	0.00218486
ENSMUSG00000019916	P4HA1	939.022	0.528224	0.144776	3.64856	0.000263715	0.00437504
ENSMUSG00000060012	KIF13B	1317.34	0.525875	0.152209	3.45496	0.000550372	0.00773439
ENSMUSG00000036046	5031439G07RIK	614.427	0.524322	0.173421	3.0234	0.00249951	0.0240972
ENSMUSG00000028032	PAPSS1	1779.13	0.524067	0.11067	4.73541	2.18613e-06	8.77343e-05
ENSMUSG00000040105	PLPP6	669.161	0.521843	0.149774	3.48419	0.00049363	0.00712286
ENSMUSG00000086290	SNHG12	834.311	0.521759	0.179587	2.90534	0.0036686	0.0318498
ENSMUSG00000034403	PJA1	1583.17	0.520118	0.187439	2.77487	0.00552233	0.0425255
ENSMUSG00000090019	GIMAP1	3641.34	0.51941	0.180247	2.88166	0.00395591	0.0335418
ENSMUSG00000022555	DGAT1	414.785	0.518451	0.144996	3.57563	0.000349391	0.00544807
ENSMUSG00000038615	NFE2L1	3861.85	0.517338	0.149079	3.47023	0.000520004	0.00740108
ENSMUSG00000030583	SIPA1L3	1373.64	0.515049	0.159973	3.2196	0.00128369	0.01477
ENSMUSG00000039952	DAG1	2173.38	0.513654	0.149245	3.44169	0.000578082	0.00808298
ENSMUSG00000039662	ICMT	2362.68	0.513572	0.11832	4.34052	1.42145e-05	0.000424526
ENSMUSG00000024516	SEC11C	2553.69	0.513543	0.169119	3.03658	0.0023928	0.023239
ENSMUSG00000075701	SELENOS	1170.61	0.512783	0.150598	3.40498	0.000661699	0.00904015
ENSMUSG00000039725	TRP53RKA	899.002	0.507051	0.15509	3.2694	0.00107776	0.0130197
ENSMUSG00000007603	DUS3L	1567.3	0.506859	0.129934	3.9009	9.58354e-05	0.00196799
ENSMUSG00000054150	SYNE3	1968.12	0.506601	0.173043	2.9276	0.00341589	0.030302
ENSMUSG00000015994	FNTA	2452.19	0.505238	0.116078	4.35257	1.3455e-05	0.000406203
ENSMUSG00000027809	ETFDH	2012.19	0.504434	0.119987	4.20407	2.62158e-05	0.00069693
ENSMUSG00000026563	TADA1	1680.23	0.504399	0.0974434	5.17632	2.26303e-07	1.32102e-05
ENSMUSG00000003031	CDKN1B	2668.73	0.503956	0.165388	3.04712	0.00231046	0.0226103
ENSMUSG00000020375	RUFY1	406.08	0.502993	0.182907	2.74999	0.00595971	0.0450215
ENSMUSG00000046675	TMEM251	918.754	0.502821	0.171369	2.93414	0.00334473	0.0298328
ENSMUSG00000027634	NDRG3	2060.7	0.50167	0.174132	2.88098	0.00396446	0.0335973
ENSMUSG00000066621	TECPR1	4611.55	0.500874	0.177261	2.82563	0.00471878	0.037948
ENSMUSG00000050846	ZFP623	491.458	0.499621	0.133186	3.75132	0.000175909	0.00321665
ENSMUSG00000026502	DESI2	2080.09	0.499036	0.139879	3.56764	0.000360213	0.0055677
ENSMUSG00000038485	SOCS7	2303.43	0.497499	0.139043	3.57803	0.000346195	0.00542189
ENSMUSG00000027195	HSD17B12	2849.52	0.495548	0.119532	4.14572	3.38745e-05	0.000854283
ENSMUSG00000005949	CTNS	568.658	0.495001	0.174108	2.84307	0.00446817	0.0364862
ENSMUSG00000021902	PHF7	569.626	0.492875	0.119755	4.11569	3.86027e-05	0.000956189
ENSMUSG00000028152	TSPAN5	893.548	0.492069	0.139887	3.51762	0.000435442	0.00642081
ENSMUSG00000045594	GLB1	3089.71	0.491276	0.148329	3.31206	0.000926113	0.0116164
ENSMUSG00000019952	POC1B	1075.29	0.490845	0.108603	4.51962	6.19515e-06	0.000208945
ENSMUSG00000030861	ACADSB	985.618	0.490665	0.161055	3.04657	0.00231469	0.0226384
ENSMUSG00000035596	MBOAT7	2645.43	0.48908	0.159058	3.07485	0.0021061	0.021156
ENSMUSG00000036707	CAB39	6816.86	0.487469	0.163751	2.9769	0.00291182	0.0270974
ENSMUSG00000103041	GM37305	285.768	0.484216	0.169162	2.86244	0.00420396	0.0349179
ENSMUSG00000028645	SLC2A1	918.277	0.483412	0.158256	3.05463	0.00225342	0.0222943
ENSMUSG00000030691	FCHSD2	1899.65	0.482922	0.152419	3.16838	0.00153293	0.0167051
ENSMUSG00000013622	ATRAID	863.844	0.482853	0.159732	3.02289	0.00250371	0.0240972
ENSMUSG00000005973	RCN1	1159.59	0.481686	0.166634	2.89068	0.00384414	0.0328948
ENSMUSG00000021468	SPTLC1	1621.45	0.481466	0.127391	3.77944	0.00015718	0.0029287
ENSMUSG00000033629	HACD3	3172.69	0.479592	0.11936	4.01802	5.86883e-05	0.00133125
ENSMUSG00000073147	5031425E22RIK	511.351	0.477269	0.172691	2.76372	0.00571464	0.0435644
ENSMUSG00000038518	JARID2	3861.16	0.476358	0.166801	2.85585	0.0042922	0.0354568
ENSMUSG00000018999	SLC35B4	2877.76	0.476127	0.175854	2.70751	0.00677893	0.0495509
ENSMUSG00000090150	ACAD11	1082.88	0.474473	0.134495	3.5278	0.000419027	0.00621283
ENSMUSG00000032123	DPAGT1	1062.27	0.474128	0.142827	3.31959	0.000901492	0.011376
ENSMUSG00000022744	CLDND1	1351.25	0.471158	0.108214	4.35397	1.33696e-05	0.000405829
ENSMUSG00000023965	FBXL17	915.634	0.46962	0.143257	3.27816	0.00104484	0.0127048
ENSMUSG00000033096	APMAP	1214.96	0.468976	0.10157	4.61726	3.88845e-06	0.000141433
ENSMUSG00000087177	E130307A14RIK	460.202	0.468399	0.138393	3.38455	0.000712954	0.00955335
ENSMUSG00000057156	HOMEZ	693.382	0.467614	0.157611	2.96689	0.00300829	0.0276713
ENSMUSG00000031681	SMAD1	1163.78	0.467118	0.105196	4.44045	8.97721e-06	0.00028822
ENSMUSG00000018171	VMP1	2497.23	0.464055	0.124536	3.72628	0.000194326	0.00346241
ENSMUSG00000075327	ZBTB2	1660.85	0.463691	0.114435	4.05199	5.07831e-05	0.00119244
ENSMUSG00000020818	MFSD11	678.522	0.463201	0.121024	3.82734	0.000129533	0.00251168
ENSMUSG00000052253	ZFP622	2054.4	0.462126	0.141102	3.27512	0.00105617	0.0128052
ENSMUSG00000009905	KDSR	1218.96	0.459328	0.159633	2.87739	0.00400974	0.0337923
ENSMUSG00000036138	ACAA1A	2030.4	0.459131	0.162022	2.83376	0.00460039	0.0372465
ENSMUSG00000036442	THAP11	1650.67	0.45576	0.151827	3.00184	0.00268349	0.0254406
ENSMUSG00000008435	RDH13	650.198	0.454517	0.131574	3.45445	0.000551427	0.0077427
ENSMUSG00000036339	TMEM260	1447.59	0.454386	0.15606	2.9116	0.00359581	0.0314268
ENSMUSG00000031066	USP11	6494.78	0.453954	0.144867	3.13358	0.00172687	0.0182469
ENSMUSG00000079487	MED12	7644.93	0.45332	0.164492	2.75587	0.00585354	0.0444204
ENSMUSG00000002489	TIAM1	3183.47	0.452125	0.164681	2.74546	0.00604262	0.0455242
ENSMUSG00000027341	TMEM230	897.179	0.451936	0.147103	3.07223	0.00212465	0.0212656
ENSMUSG00000033885	PXK	1521.33	0.451373	0.106066	4.25559	2.08497e-05	0.000584037
ENSMUSG00000039357	FUT11	779.2	0.448688	0.14024	3.19943	0.00137701	0.0155122
ENSMUSG00000005823	GPR108	1350.27	0.44855	0.156929	2.85829	0.00425926	0.0352895
ENSMUSG00000005069	PEX5	2290.93	0.447063	0.164513	2.71749	0.00657788	0.0486781
ENSMUSG00000009995	TAZ	1192.85	0.445672	0.141671	3.14583	0.00165616	0.0176562
ENSMUSG00000038250	USP38	3272.89	0.445607	0.132588	3.36083	0.000777086	0.0101673
ENSMUSG00000037845	FDXACB1	213.477	0.442506	0.131327	3.3695	0.000753037	0.00993046
ENSMUSG00000025935	TRAM1	6330.82	0.441288	0.141835	3.11127	0.00186287	0.0193061
ENSMUSG00000049106	DCAF5	3355.58	0.440822	0.154218	2.85843	0.00425744	0.0352895
ENSMUSG00000032046	ABHD12	1471.8	0.440602	0.149329	2.95055	0.0031721	0.0286635
ENSMUSG00000031959	WDR59	1151.62	0.438479	0.105556	4.154	3.26716e-05	0.000830519
ENSMUSG00000026430	RASSF5	8457.94	0.438244	0.157409	2.78411	0.00536755	0.0417963
ENSMUSG00000036620	MGAT4B	979.556	0.437748	0.143519	3.0501	0.00228763	0.0225056
ENSMUSG00000063870	CHD4	38209.7	0.43754	0.108049	4.04944	5.13396e-05	0.00120212
ENSMUSG00000045795	WHAMM	755.256	0.434205	0.11577	3.75058	0.000176423	0.00321899
ENSMUSG00000047635	2810006K23RIK	564.666	0.434107	0.134772	3.22103	0.00127729	0.01473
ENSMUSG00000022159	RAB2B	870.505	0.432841	0.149857	2.88836	0.00387261	0.0330779
ENSMUSG00000026027	STRADB	952.537	0.432501	0.107106	4.03807	5.38932e-05	0.00123592
ENSMUSG00000030823	9130019O22RIK	501.959	0.430174	0.153917	2.79485	0.00519245	0.040852
ENSMUSG00000036026	TMEM63B	616.766	0.428988	0.138326	3.10128	0.00192689	0.0197723
ENSMUSG00000028163	NFKB1	8661.07	0.428384	0.13679	3.1317	0.00173799	0.0183181
ENSMUSG00000028127	ABCD3	887.872	0.427199	0.145674	2.93257	0.0033617	0.0299485
ENSMUSG00000032202	RAB27A	9781.6	0.426518	0.146857	2.90431	0.00368069	0.0318885
ENSMUSG00000021497	TXNDC15	1204.64	0.425721	0.142083	2.99628	0.00273291	0.0258358
ENSMUSG00000040697	DNAJC16	843.018	0.425526	0.1388	3.06576	0.00217116	0.0216533
ENSMUSG00000028826	TMEM57	2322.74	0.424037	0.11978	3.54012	0.000399943	0.00599019
ENSMUSG00000047604	FRAT2	2298.83	0.423641	0.142486	2.97321	0.00294702	0.0272437
ENSMUSG00000028191	BCL10	1839.35	0.420861	0.134081	3.13885	0.00169614	0.0179881
ENSMUSG00000021518	PTDSS1	2499.28	0.419446	0.0991832	4.229	2.34734e-05	0.000637302
ENSMUSG00000098923	TMEM185B	1063.96	0.418352	0.123733	3.38108	0.000722019	0.00962788
ENSMUSG00000053091	LINS1	442.352	0.417093	0.120556	3.45975	0.000540685	0.00762394
ENSMUSG00000015869	PRPSAP1	2191.94	0.416684	0.130046	3.20414	0.00135466	0.0153814
ENSMUSG00000014837	4931428F04RIK	724.897	0.416377	0.132948	3.13188	0.00173691	0.0183181
ENSMUSG00000008763	MAN1A2	2711.35	0.416307	0.151283	2.75184	0.00592617	0.0448086
ENSMUSG00000071669	SNX29	300.46	0.41519	0.14723	2.82001	0.00480217	0.038545
ENSMUSG00000029587	ZFP12	1186.05	0.413393	0.117071	3.53113	0.000413795	0.00615166
ENSMUSG00000063410	STK24	6222.49	0.41257	0.128067	3.22152	0.00127511	0.0147249
ENSMUSG00000035437	RABGAP1	2310.06	0.411334	0.143498	2.86648	0.00415062	0.0346473
ENSMUSG00000078517	EMC1	1604.87	0.408733	0.141358	2.89147	0.00383444	0.0328624
ENSMUSG00000025823	PDIA4	4913.06	0.408185	0.128472	3.17723	0.00148687	0.0163504
ENSMUSG00000029550	SPPL3	2764.71	0.40814	0.124573	3.27632	0.00105171	0.012779
ENSMUSG00000046020	POFUT1	1668.58	0.4067	0.122466	3.32092	0.0008972	0.0113409
ENSMUSG00000022125	CLN5	1231.53	0.404708	0.102644	3.94282	8.05305e-05	0.00170964
ENSMUSG00000005374	TBL2	1627.45	0.404005	0.136614	2.95728	0.00310369	0.0282531
ENSMUSG00000048997	ATXN7L2	924.755	0.402547	0.143043	2.81417	0.00489028	0.0390592
ENSMUSG00000041720	PI4KA	6285.62	0.402531	0.100844	3.99162	6.56245e-05	0.00145113
ENSMUSG00000048921	ZFP689	391.831	0.402056	0.125796	3.1961	0.00139301	0.0155978
ENSMUSG00000038425	POLI	897.274	0.401414	0.131472	3.05323	0.00226392	0.0223564
ENSMUSG00000000738	SPG7	1908.92	0.401362	0.124979	3.21144	0.00132072	0.0150725
ENSMUSG00000075419	DOLK	386.542	0.401289	0.146265	2.74357	0.00607749	0.045725
ENSMUSG00000036968	CNPY4	772.994	0.399579	0.130135	3.0705	0.00213701	0.0213765
ENSMUSG00000021794	GLUD1	5378.15	0.398733	0.103755	3.84304	0.000121521	0.00239244
ENSMUSG00000030894	TPP1	2924	0.395704	0.144084	2.74633	0.00602655	0.0454441
ENSMUSG00000027893	AHCYL1	3705.21	0.393964	0.119889	3.28607	0.00101596	0.0124625
ENSMUSG00000020376	RNF130	3549.28	0.390009	0.120815	3.22815	0.00124595	0.0145057
ENSMUSG00000041530	AGO1	7015.4	0.388032	0.137297	2.82622	0.00471012	0.0378966
ENSMUSG00000032553	SRPRB	1957.28	0.385926	0.134212	2.87549	0.00403401	0.0339626
ENSMUSG00000021458	2010111I01RIK	713.482	0.384709	0.130992	2.9369	0.00331507	0.0296439
ENSMUSG00000030166	RAD52	807.341	0.383759	0.122267	3.1387	0.00169699	0.0179881
ENSMUSG00000029234	TMEM165	1754.17	0.383252	0.131635	2.91147	0.00359729	0.0314268
ENSMUSG00000047379	B4GAT1	548.614	0.379015	0.126688	2.99172	0.00277415	0.0260779
ENSMUSG00000005907	PEX1	724.979	0.377852	0.107077	3.52879	0.000417467	0.00619521
ENSMUSG00000028962	SLC4A2	2424.98	0.377617	0.123558	3.05618	0.00224176	0.0222246
ENSMUSG00000040365	TRIM41	1251.11	0.377433	0.128722	2.93215	0.00336619	0.0299726
ENSMUSG00000066441	RDH11	1471.4	0.376483	0.119468	3.15132	0.00162532	0.017411
ENSMUSG00000016481	CR1L	2664.57	0.373691	0.0853667	4.37748	1.20061e-05	0.000370503
ENSMUSG00000028291	AKIRIN2	1410.05	0.372925	0.115846	3.21915	0.00128571	0.0147795
ENSMUSG00000071650	GANAB	8869.28	0.371797	0.113009	3.28999	0.0010019	0.0123353
ENSMUSG00000038503	MESDC2	3135.65	0.370418	0.092722	3.99493	6.47136e-05	0.00143548
ENSMUSG00000021666	GFM2	1365.38	0.369399	0.0953197	3.87537	0.000106463	0.00214662
ENSMUSG00000013973	DEDD	1385.6	0.364986	0.12651	2.88503	0.00391378	0.03332
ENSMUSG00000024104	WASHC2	3257.64	0.364649	0.115835	3.14801	0.00164387	0.0175911
ENSMUSG00000020986	SEC23A	1496.4	0.363449	0.111738	3.2527	0.00114314	0.0135352
ENSMUSG00000001829	CLPB	1256.27	0.362045	0.12472	2.90286	0.00369773	0.0320029
ENSMUSG00000020409	SLU7	2669.23	0.359144	0.132432	2.71191	0.00668976	0.049252
ENSMUSG00000020964	SEL1L	3020.66	0.357398	0.123282	2.89904	0.00374306	0.0322615
ENSMUSG00000015714	CERS2	4227.3	0.356064	0.0866024	4.11148	3.93134e-05	0.00096948
ENSMUSG00000027243	HARBI1	477.111	0.353936	0.124673	2.83892	0.00452666	0.0368826
ENSMUSG00000039414	HEATR5B	2378.12	0.353484	0.130435	2.71003	0.00672766	0.049326
ENSMUSG00000019518	AP4M1	1093.33	0.349948	0.0985716	3.55019	0.000384957	0.00585059
ENSMUSG00000015937	H2AFY	19779.7	0.349853	0.110611	3.1629	0.00156204	0.016934
ENSMUSG00000032437	STT3B	6923.93	0.346614	0.12252	2.82903	0.00466896	0.0376819
ENSMUSG00000032512	WDR48	3076.85	0.341397	0.0656364	5.20133	1.97866e-07	1.16727e-05
ENSMUSG00000024687	OSBP	4103.08	0.341118	0.106273	3.20983	0.00132812	0.0151455
ENSMUSG00000034354	MTMR3	5734.89	0.335378	0.123439	2.71696	0.00658855	0.0487182
ENSMUSG00000001441	NPEPPS	3214.45	0.334495	0.0973982	3.4343	0.000594086	0.00825835
ENSMUSG00000041915	AMMECR1L	2901.75	0.326759	0.105196	3.1062	0.00189509	0.0195541
ENSMUSG00000020612	PRKAR1A	18847.3	0.32569	0.11212	2.90485	0.00367432	0.0318498
ENSMUSG00000045071	E130308A19RIK	754.128	0.318922	0.113407	2.81219	0.00492062	0.0392497
ENSMUSG00000028759	HP1BP3	17460.7	0.311824	0.109235	2.85461	0.00430898	0.0355076
ENSMUSG00000026698	PIGC	560.874	0.307398	0.102366	3.00293	0.00267391	0.0253786
ENSMUSG00000024127	PREPL	1057.4	0.305937	0.101426	3.01635	0.00255837	0.024402
ENSMUSG00000019143	HARS2	1094.97	0.302038	0.103413	2.9207	0.00349249	0.0308177
ENSMUSG00000027865	GDAP2	785.785	0.299691	0.110627	2.70903	0.00674797	0.0493611
ENSMUSG00000007458	M6PR	8259.78	0.287461	0.0917539	3.13296	0.00173055	0.0182743
ENSMUSG00000039000	UBE3C	2632.05	0.282623	0.104026	2.71683	0.00659095	0.0487182
ENSMUSG00000033628	PIK3C3	2148.92	0.276859	0.079739	3.47206	0.000516476	0.00736847
ENSMUSG00000042305	TMEM183A	2112.14	0.275979	0.0976111	2.82734	0.00469371	0.0378375
ENSMUSG00000048429	TIMM29	2958.84	0.273352	0.100443	2.72146	0.00649937	0.0481825
ENSMUSG00000005609	CTR9	3669.75	0.263637	0.0853545	3.08873	0.00201011	0.0203881
ENSMUSG00000042506	USP22	6245.25	0.261115	0.0776379	3.36325	0.000770319	0.010127
ENSMUSG00000025266	GNL3L	3333.63	0.260281	0.0933382	2.78858	0.00529389	0.0414875
ENSMUSG00000030870	UBFD1	2620.26	0.258121	0.0909571	2.83783	0.00454218	0.036991
ENSMUSG00000009112	BCL2L13	3180.72	0.195108	0.0719813	2.71053	0.00671755	0.0493182
ENSMUSG00000056820	TSNAX	2903.73	-0.224991	0.068254	-3.29637	0.000979422	0.0121333
ENSMUSG00000029454	MAPKAPK5	1270.57	-0.23235	0.0810814	-2.86564	0.00416173	0.0346901
ENSMUSG00000027411	VPS16	2365.62	-0.243754	0.0851271	-2.86342	0.00419101	0.034845
ENSMUSG00000005683	CS	9097.64	-0.24619	0.0890504	-2.76461	0.005699	0.0435047
ENSMUSG00000024271	ELP2	3993.38	-0.251352	0.0873448	-2.8777	0.00400588	0.0337915
ENSMUSG00000031575	ASH2L	3076.9	-0.264392	0.0956925	-2.76293	0.00572848	0.04363
ENSMUSG00000056167	CNOT10	2672.38	-0.265871	0.0909751	-2.92246	0.00347275	0.030676
ENSMUSG00000058440	NRF1	2277.95	-0.269313	0.0955008	-2.82001	0.00480226	0.038545
ENSMUSG00000035232	PDK3	1667.87	-0.273856	0.097939	-2.79619	0.00517086	0.0407782
ENSMUSG00000020946	GOSR2	4598.15	-0.274647	0.100062	-2.74476	0.00605547	0.0455798
ENSMUSG00000001383	ZMAT2	3321.97	-0.277862	0.102384	-2.71392	0.00664916	0.04901
ENSMUSG00000063888	RPL7L1	3409.57	-0.282186	0.0912765	-3.09155	0.00199116	0.0202204
ENSMUSG00000027282	MTCH2	2091.68	-0.283777	0.0925229	-3.0671	0.00216147	0.0215695
ENSMUSG00000042369	RBM45	1568.41	-0.285052	0.0918148	-3.10464	0.00190513	0.0196213
ENSMUSG00000026843	FUBP3	1558.33	-0.288727	0.0978144	-2.95178	0.00315947	0.0285894
ENSMUSG00000028453	FANCG	825.751	-0.302496	0.101211	-2.98876	0.00280111	0.0262869
ENSMUSG00000026755	ARPC5L	2433.38	-0.303199	0.0833557	-3.63741	0.000275394	0.00452085
ENSMUSG00000029404	ARL6IP4	2055.07	-0.309005	0.11039	-2.79922	0.00512268	0.0405064
ENSMUSG00000020171	YEATS4	2290.48	-0.30948	0.0951182	-3.25363	0.0011394	0.0135197
ENSMUSG00000014402	TSG101	2545.19	-0.309894	0.103656	-2.98964	0.00279307	0.0262263
ENSMUSG00000001380	HARS	2958.15	-0.313634	0.109097	-2.87482	0.00404263	0.034018
ENSMUSG00000048497	MMGT2	883.572	-0.314601	0.107354	-2.93049	0.00338424	0.0300851
ENSMUSG00000026309	ILKAP	2031.59	-0.317445	0.100664	-3.1535	0.00161323	0.0173425
ENSMUSG00000021460	AUH	1106.86	-0.319845	0.102901	-3.10828	0.0018818	0.0194393
ENSMUSG00000036819	JMJD4	919.4	-0.320684	0.11487	-2.79171	0.00524311	0.0412117
ENSMUSG00000038417	FIG4	1642.93	-0.320696	0.100059	-3.20507	0.00135031	0.0153461
ENSMUSG00000024218	TAF11	964.867	-0.323813	0.0791405	-4.09162	4.28364e-05	0.00103796
ENSMUSG00000029993	NFU1	1264.34	-0.323907	0.114299	-2.83387	0.00459883	0.0372465
ENSMUSG00000040667	NUP88	2917.81	-0.326312	0.10202	-3.19852	0.00138137	0.0155146
ENSMUSG00000057130	TXNL4A	1227.23	-0.327886	0.118989	-2.75559	0.00585858	0.0444384
ENSMUSG00000014767	TBP	1358.6	-0.328424	0.114378	-2.8714	0.00408659	0.0342498
ENSMUSG00000020228	HELB	1715.25	-0.331468	0.117116	-2.83025	0.00465117	0.0375672
ENSMUSG00000020392	CDKN2AIPNL	4729.69	-0.332588	0.100516	-3.3088	0.000936953	0.011726
ENSMUSG00000028899	TAF12	1549.83	-0.338398	0.0926725	-3.65155	0.000260667	0.00434314
ENSMUSG00000017781	PITPNA	8641.32	-0.343117	0.101243	-3.38903	0.000701392	0.00942813
ENSMUSG00000031479	VPS36	2877.45	-0.343452	0.113622	-3.02277	0.00250472	0.0240972
ENSMUSG00000024258	POLR2D	1160.05	-0.344522	0.123581	-2.78782	0.0053064	0.0414992
ENSMUSG00000025421	HDHD2	916.69	-0.347856	0.0828778	-4.19721	2.70222e-05	0.000717227
ENSMUSG00000018322	TOMM34	2054.14	-0.348493	0.119379	-2.91921	0.00350917	0.0308989
ENSMUSG00000001847	RAC1	9070.16	-0.351728	0.0948592	-3.7079	0.000208985	0.00364578
ENSMUSG00000071646	MTA2	17762.1	-0.352497	0.11655	-3.02443	0.00249102	0.0240391
ENSMUSG00000029676	POT1A	1313.56	-0.357689	0.110122	-3.24812	0.0011617	0.0137162
ENSMUSG00000029472	ANAPC5	14081.6	-0.357917	0.11412	-3.13633	0.00171077	0.0181111
ENSMUSG00000025872	THOC3	2081.05	-0.359	0.129894	-2.76379	0.00571349	0.0435644
ENSMUSG00000028886	EYA3	2785.31	-0.359	0.107845	-3.32886	0.000872023	0.0110964
ENSMUSG00000063895	NUPL1	2139.86	-0.359023	0.111376	-3.22353	0.00126623	0.0146992
ENSMUSG00000026926	PMPCA	3528.75	-0.359137	0.109482	-3.28032	0.00103689	0.0126264
ENSMUSG00000038685	RTEL1	1198.24	-0.361517	0.0992126	-3.64387	0.000268573	0.00443505
ENSMUSG00000024422	DHX16	3320.49	-0.361715	0.110836	-3.26353	0.00110032	0.0131801
ENSMUSG00000030536	IQGAP1	26513.3	-0.363438	0.110957	-3.2755	0.00105477	0.0127975
ENSMUSG00000019923	ZWINT	2506.89	-0.369596	0.0867419	-4.26087	2.03631e-05	0.000573293
ENSMUSG00000020003	PEX7	1009.26	-0.370326	0.136435	-2.71432	0.00664129	0.0489953
ENSMUSG00000057572	ZBTB8OS	1264.21	-0.370835	0.0997764	-3.71666	0.000201876	0.00355519
ENSMUSG00000034544	RSRC1	997.311	-0.37085	0.134092	-2.76564	0.00568107	0.0434075
ENSMUSG00000031516	DCTN6	2546.56	-0.372715	0.0986914	-3.77657	0.000159005	0.00295941
ENSMUSG00000029165	AGBL5	1692.26	-0.373667	0.11969	-3.12195	0.00179656	0.0187964
ENSMUSG00000000876	PXMP4	1188.83	-0.374832	0.127966	-2.92915	0.00339886	0.0301991
ENSMUSG00000020973	DNAAF2	864.293	-0.375846	0.118736	-3.16539	0.00154874	0.0168115
ENSMUSG00000031023	AKIP1	489.735	-0.376516	0.116174	-3.24096	0.00119127	0.013996
ENSMUSG00000009079	EWSR1	15076.6	-0.377852	0.127514	-2.96323	0.00304432	0.0278645
ENSMUSG00000026617	BPNT1	449.446	-0.377897	0.12479	-3.02826	0.00245966	0.0238052
ENSMUSG00000034848	TTC21B	697.379	-0.383593	0.138624	-2.76716	0.00565474	0.0433253
ENSMUSG00000032329	HMG20A	2744.13	-0.385153	0.1228	-3.13644	0.00171014	0.0181111
ENSMUSG00000052997	UBA2	6912.59	-0.387839	0.118937	-3.26088	0.00111069	0.0132829
ENSMUSG00000038633	DEGS1	1989.88	-0.389024	0.0960414	-4.05059	5.1089e-05	0.00119794
ENSMUSG00000091537	TMA7	4433.28	-0.390681	0.126637	-3.08505	0.00203518	0.0205549
ENSMUSG00000015120	UBE2I	8362.93	-0.391236	0.0598537	-6.53654	6.2959e-11	1.03049e-08
ENSMUSG00000017715	PGS1	1509.44	-0.392837	0.128666	-3.05316	0.00226443	0.0223564
ENSMUSG00000014551	MRPS25	927.936	-0.393435	0.136694	-2.87823	0.00399917	0.0337915
ENSMUSG00000002326	GMPR2	818.6	-0.395081	0.106702	-3.70267	0.00021334	0.00368327
ENSMUSG00000032782	CNTROB	1388.2	-0.395392	0.135546	-2.91703	0.00353384	0.031035
ENSMUSG00000019927	UBE2D1	938.5	-0.397316	0.131556	-3.02014	0.00252658	0.0242017
ENSMUSG00000046062	PPP1R15B	5955.11	-0.398117	0.122987	-3.23707	0.00120763	0.0141384
ENSMUSG00000034278	DNAJC17	463.849	-0.399459	0.135915	-2.93903	0.00329241	0.0294886
ENSMUSG00000003184	IRF3	2656.75	-0.401233	0.138099	-2.9054	0.00366781	0.0318498
ENSMUSG00000002307	DAXX	2629.85	-0.401455	0.144949	-2.76963	0.00561202	0.043028
ENSMUSG00000025785	EXOSC7	1030.66	-0.402683	0.140257	-2.87103	0.00409138	0.0342556
ENSMUSG00000030056	ISY1	2283.06	-0.403358	0.0891759	-4.52317	6.09199e-06	0.000205882
ENSMUSG00000062580	TIMM17A	1158.31	-0.403643	0.142323	-2.8361	0.00456675	0.0371026
ENSMUSG00000021288	KLC1	1781.94	-0.40489	0.111702	-3.62475	0.000289245	0.00470657
ENSMUSG00000022681	NTAN1	1486.69	-0.406263	0.0973491	-4.17326	3.00274e-05	0.000778429
ENSMUSG00000025337	SBDS	1554.01	-0.406319	0.116301	-3.49369	0.000476401	0.00692212
ENSMUSG00000063200	NOL7	2210.73	-0.407009	0.147155	-2.76586	0.00567731	0.0434075
ENSMUSG00000025200	CWF19L1	756.217	-0.408702	0.133019	-3.07251	0.00212264	0.0212656
ENSMUSG00000032047	ACAT1	3000.62	-0.410425	0.114444	-3.58625	0.000335467	0.0052886
ENSMUSG00000068742	CRY2	718.395	-0.410594	0.141944	-2.89264	0.00382016	0.0327568
ENSMUSG00000061887	SSBP3	9674.92	-0.410683	0.112687	-3.64445	0.000267959	0.00442928
ENSMUSG00000042079	HNRNPF	31202.4	-0.411747	0.124993	-3.29415	0.000987193	0.0121993
ENSMUSG00000032366	TPM1	785.422	-0.412663	0.144494	-2.85592	0.00429129	0.0354568
ENSMUSG00000070000	FCHO1	6432.3	-0.413195	0.129331	-3.19487	0.00139894	0.0156525
ENSMUSG00000032498	MLH1	896.769	-0.413533	0.121253	-3.4105	0.000648444	0.00888087
ENSMUSG00000071415	RPL23	22258.4	-0.415282	0.139761	-2.97137	0.00296473	0.0273611
ENSMUSG00000106918	MRPL33	1406.74	-0.417021	0.142954	-2.91718	0.00353211	0.031035
ENSMUSG00000042055	WDR11	1305.62	-0.417664	0.146838	-2.84439	0.00444969	0.0363976
ENSMUSG00000020180	SNRPD3	3685.92	-0.419161	0.14885	-2.81599	0.0048627	0.038918
ENSMUSG00000074088	SNRNP40	3027.79	-0.419181	0.144676	-2.89738	0.00376294	0.0323826
ENSMUSG00000024537	PSMG2	974.836	-0.419422	0.15298	-2.74168	0.00611255	0.0459211
ENSMUSG00000017801	MLX	1821.72	-0.41944	0.13794	-3.04074	0.00235999	0.0229738
ENSMUSG00000022964	TMEM50B	1500.46	-0.421735	0.148703	-2.83609	0.00456698	0.0371026
ENSMUSG00000040723	RCSD1	13252.1	-0.423526	0.129777	-3.26348	0.00110052	0.0131801
ENSMUSG00000031349	NSDHL	847.946	-0.426776	0.147011	-2.90302	0.00369583	0.0320029
ENSMUSG00000042901	AIDA	1202.2	-0.427445	0.143888	-2.97068	0.00297145	0.0273928
ENSMUSG00000020720	PSMD12	2827.19	-0.429469	0.144365	-2.97489	0.00293095	0.0271711
ENSMUSG00000068391	CHRAC1	978.875	-0.430822	0.158786	-2.71322	0.00666322	0.049092
ENSMUSG00000058388	PHTF1	2097.54	-0.431136	0.140722	-3.06373	0.00218593	0.0217875
ENSMUSG00000031386	HCFC1	15007.4	-0.431528	0.15115	-2.85496	0.00430417	0.035503
ENSMUSG00000026618	IARS2	2523.13	-0.431701	0.137942	-3.12959	0.00175052	0.0184152
ENSMUSG00000031546	GINS4	1495.5	-0.431918	0.141378	-3.05506	0.00225013	0.0222811
ENSMUSG00000000751	RPA1	7314.51	-0.43258	0.14871	-2.90888	0.00362721	0.0315891
ENSMUSG00000045896	PAIP2B	1898.15	-0.433597	0.136674	-3.1725	0.00151131	0.0165339
ENSMUSG00000035212	LEPROT	986.009	-0.433871	0.148645	-2.91885	0.00351329	0.0309033
ENSMUSG00000020250	TXNRD1	4113.88	-0.434057	0.115767	-3.7494	0.00017726	0.0032266
ENSMUSG00000037364	SRRT	7592.39	-0.434749	0.140523	-3.09378	0.00197624	0.0201425
ENSMUSG00000031485	PROSC	1204.05	-0.43519	0.121044	-3.59531	0.000324009	0.00515666
ENSMUSG00000003813	RAD23A	2662.43	-0.435975	0.136771	-3.18762	0.00143451	0.0159449
ENSMUSG00000027679	DNAJC19	866.593	-0.436621	0.156447	-2.79086	0.00525675	0.0412801
ENSMUSG00000001415	SMG5	4303.84	-0.436657	0.145822	-2.99445	0.00274938	0.0258889
ENSMUSG00000052397	EZR	26793.3	-0.438003	0.141645	-3.09227	0.00198635	0.0202151
ENSMUSG00000021621	ZCCHC9	813.038	-0.438569	0.162194	-2.70397	0.00685156	0.0499943
ENSMUSG00000006392	MED8	1108.59	-0.439497	0.102611	-4.28314	1.84275e-05	0.00052321
ENSMUSG00000032477	CDC25A	2899.83	-0.439702	0.153078	-2.8724	0.00407362	0.0341926
ENSMUSG00000018449	RPAIN	561.124	-0.440119	0.159068	-2.76686	0.0056599	0.043345
ENSMUSG00000039128	CDC123	2075.93	-0.444513	0.151094	-2.94196	0.00326142	0.0292739
ENSMUSG00000032249	ANP32A	10040.7	-0.446725	0.138879	-3.21666	0.00129694	0.0148714
ENSMUSG00000024135	SRBD1	996.188	-0.448722	0.130622	-3.43528	0.000591949	0.00823548
ENSMUSG00000026927	SDCCAG3	1987.68	-0.449352	0.117088	-3.83774	0.000124172	0.00243031
ENSMUSG00000031467	AGPAT5	1505.12	-0.450956	0.15399	-2.92847	0.00340637	0.0302462
ENSMUSG00000016921	SRSF6	9988.36	-0.451406	0.127377	-3.54386	0.000394316	0.00592715
ENSMUSG00000028980	H6PD	2631.35	-0.45177	0.145351	-3.10812	0.0018828	0.0194393
ENSMUSG00000027671	ACTL6A	3701.34	-0.451817	0.121407	-3.72152	0.000198027	0.00350589
ENSMUSG00000041852	TCF20	6069.69	-0.451846	0.156781	-2.88201	0.00395144	0.0335209
ENSMUSG00000061758	AKR1B10	616.789	-0.452008	0.12496	-3.61722	0.000297788	0.00481741
ENSMUSG00000035790	CEP19	980.822	-0.452171	0.142469	-3.17382	0.00150449	0.0165076
ENSMUSG00000035266	HELQ	532.352	-0.452312	0.159418	-2.83727	0.00455004	0.037037
ENSMUSG00000023832	ACAT2	1246.68	-0.452724	0.16707	-2.70979	0.00673257	0.049326
ENSMUSG00000028861	MRPS15	1328.05	-0.453123	0.140947	-3.21484	0.00130517	0.0149348
ENSMUSG00000026946	NMI	1425.74	-0.453202	0.149925	-3.02286	0.00250395	0.0240972
ENSMUSG00000062328	RPL17	46445.7	-0.453542	0.165725	-2.73671	0.00620562	0.0464587
ENSMUSG00000036918	TTC7	3848.36	-0.45546	0.158661	-2.87065	0.00409625	0.0342791
ENSMUSG00000020849	YWHAE	16019.3	-0.458622	0.13602	-3.37171	0.000747021	0.00990191
ENSMUSG00000030225	DERA	1643.08	-0.459114	0.138581	-3.31298	0.000923076	0.011587
ENSMUSG00000017221	PSMD3	7704.97	-0.460037	0.149196	-3.08344	0.00204624	0.0206417
ENSMUSG00000031683	LSM6	1954.79	-0.461091	0.149867	-3.07667	0.00209326	0.0210398
ENSMUSG00000026427	EIF2D	1925.77	-0.461102	0.131859	-3.49693	0.000470646	0.0068564
ENSMUSG00000024454	HDAC3	3508.82	-0.461545	0.12346	-3.73843	0.000185175	0.00334216
ENSMUSG00000043483	GM6863	5189.44	-0.462685	0.169147	-2.7354	0.00623043	0.0465817
ENSMUSG00000040586	OFD1	574.585	-0.463298	0.170143	-2.723	0.00646923	0.0481086
ENSMUSG00000021461	FANCC	380.181	-0.463838	0.130888	-3.54378	0.000394433	0.00592715
ENSMUSG00000043866	TAF10	3216.37	-0.463885	0.168133	-2.75904	0.00579706	0.0440318
ENSMUSG00000025532	CRCP	832.596	-0.463953	0.097853	-4.74133	2.12321e-06	8.54145e-05
ENSMUSG00000000339	RTCA	1129.73	-0.464064	0.0996386	-4.65748	3.20111e-06	0.000120467
ENSMUSG00000101188	EIF4A-PS4	17897.4	-0.464788	0.162226	-2.86507	0.00416918	0.0347154
ENSMUSG00000027472	PDRG1	3698.71	-0.464927	0.149356	-3.11288	0.00185271	0.0192597
ENSMUSG00000005417	MPRIP	7707.64	-0.464936	0.120272	-3.86571	0.000110767	0.00221601
ENSMUSG00000002396	OCEL1	688.405	-0.465475	0.171379	-2.71605	0.00660664	0.0488043
ENSMUSG00000038811	GNGT2	872.893	-0.46713	0.160028	-2.91906	0.00351094	0.0308989
ENSMUSG00000079197	PSME2	4981.83	-0.469574	0.156953	-2.99181	0.00277329	0.0260779
ENSMUSG00000031402	MPP1	5361.38	-0.470487	0.0927503	-5.07262	3.92378e-07	2.10635e-05
ENSMUSG00000059713	RCAN3	843.638	-0.470675	0.148377	-3.17216	0.00151309	0.0165339
ENSMUSG00000022706	MRPL40	1318.3	-0.471009	0.159791	-2.94767	0.00320184	0.0288944
ENSMUSG00000026806	DDX31	910.115	-0.473599	0.125566	-3.7717	0.000162137	0.00300096
ENSMUSG00000006782	CNP	8746.02	-0.473689	0.168032	-2.81905	0.00481659	0.0386415
ENSMUSG00000007656	ARPP19	2169.25	-0.474663	0.166768	-2.84625	0.00442373	0.036203
ENSMUSG00000022721	TRMT2A	2018.39	-0.477506	0.140266	-3.40429	0.000663364	0.00904724
ENSMUSG00000025137	PCYT2	1799.92	-0.477914	0.148929	-3.20901	0.00133193	0.0151682
ENSMUSG00000053317	SEC61B	4030.93	-0.478039	0.169091	-2.82711	0.00469697	0.0378455
ENSMUSG00000005103	WDR1	12093.3	-0.478705	0.162693	-2.94239	0.00325689	0.0292489
[truncated: 868 more rows]

## Sheet: 48 hours KO vs HET filtered
ID	gene	baseMean	log2FoldChange	lfcSE	stat	pvalue	padj
[truncated: 2,128 more rows]
